# Supplementary material for: Disordered proteins interact with the chemical environment to tune their protective function during drying
Source: eLife. 2024 Nov 19;13:RP97231. doi: 10.7554/eLife.97231 (PMC11575898; doi:10.7554/eLife.97231)
Supplement: Figure 1—figure supplement 1—source data 1. [file elife-97231-fig1-figsupp1-data1.xlsx]

## Sheet: figure supplement 1A
Concentration (mg/mL)	At11	At11	At11	At22	At22	At22	At44	At44	At44	Aav11	Aav11	Aav11	He11	He11	He11	Av11	Av11	Av11	At20	At20	At20	Trehalose	Trehalose	Trehalose	Sucrose	Sucrose	Sucrose
1	8.33333	6.66667	5.26316
0.5	5.40541	3.94737	5.55556
0.1	4.16667	4.05405	4.28571
0.05	3.84615	2.66667	4.16667
0.01	2.85714	2.85714	2.7027
0	1.2987	1.28205	1.31579
1				5.88235	7.69231	5.71429
0.5				2.5641	4.93827	6.32911
0.5				4.70588	4.93827	3.44828
0.05				1.21951	1.20482	1.23457
0.01				0.138889	0.655738	3.33333
0				0.810811	0.810811	1.06667
1							1.72414	5.17241	1.75439
0.5							2.5641	1.69492	3.44828
0.1							1.03896	0.987654	0.625
0.05							0.985915	0.869565	0.506329
0.01							0.357143	1.19048	1.07143
0							0.810811	0.810811	1.06667
0.5										22.093	13.9241	19.7674
0.1										8.13953	12.7907	6.97674
0.05										2.43902	3.52941	2.35294
0.01										0.714286	3.57143	1.08434
0										2.43902	0.714286	2.53165
2													32.9412	25.8824	30.1205
1													20	17.6471	11.6279
0.5													15.6627	15.1163	18.3908
0.1													2.35294	4.7619	1.16279
0.05													2.35294	2.38095	0.952381
0.01													2.63158	0.625	1.05882
0													0.941176	0.38961	0.853659
1																5.55556	8	6.49351
0.5																8.86076	5.06329	5.19481
0.1																5.71429	5.26316	5.12821
0.05																3.84615	5.26316	5.26316
0.01																4.05405	3.84615	4.05405
0																1.2987	1.28205	1.31579
20																			82.4324	82.3529	75.3425
15																			75	78.5714	71.4286
10																			73.6111	71.6418	66.1972
5																			54.4304	56.962	59.4595
2																			45.2055	52.7027	50.7692
1																			37.9747	47.5	48.6486
0.5																			38.8889	41.1765	34.7222
0.1																			6.06061	9.23077	12.5
0.05																			4.05405	6.66667	3.27869
0.01																			3.22581	3.37079	3.33333
0																			0.285714	1.42857	1.52542
20																						82.8947	88.3117	85.5263
15																						67.8571	56.1644	58.4416
10																						27.2727	25.3165	23.4568
5																						12.6582	11.25	11.25
2																						6.17284	6.41026	6.09756
1																						3.65854	4.7619	3.84615
0.5																						1.26582	4.93827	1.07143
0.1																						1.26582	0.779221	1.13924
0.05																						1.25	0.897436	1.11111
0.01																						0.759494	0.632911	1.05882
0																						1.19048	0.864198	1.21951
20																									34.2105	26.3158	31.5789
15																									15.5844	15.2778	14.2857
10																									13.5135	12.1622	14.2857
5																									14.0845	7.79221	7.69231
2																									8	8.10811	9.33333
1																									4.22535	5.40541	5
0.5																									2.66667	2.73973	5.55556
0.1																									0.821918	5.47945	2.8169
0.05																									2.66667	1.36986	1.40845
0.01																									0.675676	1.35135	2.66667
0																									1.42857	1.35135	1.35135

## Sheet: 1B_At11 Trehalose
Sample	Ratio	Protectant	Calculation	Protection	Protect_add	Stdev	%Synergy
At11	0.01	Mixed	Synergy	1.6265	1.6265	0.704296	-3.06482
At11	0.1	Mixed	Synergy	2.00871	2.00871	1.64682	-2.68261
At11	1	Mixed	Synergy	1.46949	1.46949	0.956625	-3.22183
At11	10	Mixed	Synergy	6.48076	6.48076	0.732605	1.78945
At11	100	Mixed	Synergy	31.3686	31.3686	1.73705	26.6773
At11	0.01	Protein	Additive	4.69132	5.80853	0.484684
At11	0.1	Protein	Additive	4.69132	5.93128	0.662178
At11	1	Protein	Additive	4.69132	5.5391	1.17103
At11	10	Protein	Additive	4.69132	10.6628	2.42598
At11	100	Protein	Additive	4.69132	44.8487	6.79662
At11	0.01	Sugar	Additive	1.11721	4.69132
At11	0.1	Sugar	Additive	1.23997	4.69132
At11	1	Sugar	Additive	0.847781	4.69132
At11	10	Sugar	Additive	5.97151	4.69132
At11	100	Sugar	Additive	40.1574	4.69132

## Sheet: 1B_At11 Sucrose
Sample	Ratio	Protectant	Calculation	Protection	Protect_add	Stdev	%Synergy
At11	0.01	Mixed	Synergy	2.41447	2.41447	0.131195	-2.27685
At11	0.1	Mixed	Synergy	2.45935	2.45935	0.0352043	-2.23197
At11	1	Mixed	Synergy	2.50104	2.50104	0.0625456	-2.19027
At11	10	Mixed	Synergy	4.03666	4.03666	0.917519	-0.654652
At11	100	Mixed	Synergy	9.02778	9.02778	0.867361	4.33646
At11	0.01	Protein	Additive	4.69132	5.90605	0.627103
At11	0.1	Protein	Additive	4.69132	6.39823	0.187042
At11	1	Protein	Additive	4.69132	6.29047	1.32421
At11	10	Protein	Additive	4.69132	8.07906	1.79191
At11	100	Protein	Additive	4.69132	14.8945	2.10132
At11	0.01	Sugar	Additive	1.21474	4.69132
At11	0.1	Sugar	Additive	1.70692	4.69132
At11	1	Sugar	Additive	1.59916	4.69132
At11	10	Sugar	Additive	3.38774	4.69132
At11	100	Sugar	Additive	10.2032	4.69132

## Sheet: 1B_At22 Trehalose
Sample	Ratio	Protectant	Calculation	Protection	Protect_add	Stdev	%Synergy
At22	0.01	Mixed	Synergy	6.00913	6.00913	0.705921	0.622868
At22	0.1	Mixed	Synergy	7.94116	7.94116	2.07484	2.5549
At22	1	Mixed	Synergy	8.46491	8.46491	1.344	3.07865
At22	10	Mixed	Synergy	12.5012	12.5012	0.68744	7.11489
At22	100	Mixed	Synergy	16.0639	16.0639	0.347802	10.6776
At22	0.01	Protein	Additive	5.38626	7.71682	1.74763
At22	0.1	Protein	Additive	5.38626	7.82602	2.49812
At22	1	Protein	Additive	5.38626	8.16987	1.45544
At22	10	Protein	Additive	5.38626	10.5762	2.7785
At22	100	Protein	Additive	5.38626	45.7036	6.66982
At22	0.01	Sugar	Additive	2.33056	5.38626
At22	0.1	Sugar	Additive	2.43976	5.38626
At22	1	Sugar	Additive	2.78361	5.38626
At22	10	Sugar	Additive	5.18997	5.38626
At22	100	Sugar	Additive	40.3174	5.38626

## Sheet: 1B_At22 Sucrose
Sample	Ratio	Protectant	Calculation	Protection	Protect_add	Stdev	%Synergy
At22	0.01	Mixed	Synergy	6.1281	6.1281	0.226716	0.741842
At22	0.1	Mixed	Synergy	5.66561	5.66561	1.51525	0.279354
At22	1	Mixed	Synergy	6.41847	6.41847	1.62035	1.03221
At22	10	Mixed	Synergy	8.0932	8.0932	1.24787	2.70694
At22	100	Mixed	Synergy	9.01876	9.01876	2.61164	3.6325
At22	0.01	Protein	Additive	5.38626	6.11644	0.63419
At22	0.1	Protein	Additive	5.38626	5.95948	0.87261
At22	1	Protein	Additive	5.38626	6.16895	0.502588
At22	10	Protein	Additive	5.38626	8.21028	1.57074
At22	100	Protein	Additive	5.38626	16.1796	0.606498
At22	0.01	Sugar	Additive	0.730179	5.38626
At22	0.1	Sugar	Additive	0.573223	5.38626
At22	1	Sugar	Additive	0.782686	5.38626
At22	10	Sugar	Additive	2.82402	5.38626
At22	100	Sugar	Additive	10.7934	5.38626

## Sheet: 1B_At44 Trehalose
Sample	Ratio	Protectant	Calculation	Protection	Protect_add	Stdev	%Synergy
At44	0.01	Mixed	Synergy	1.52881	1.52881	0.667674	-1.42194
At44	0.1	Mixed	Synergy	1.87285	1.87285	0.649363	-1.0779
At44	1	Mixed	Synergy	2.21028	2.21028	1.10532	-0.740472
At44	10	Mixed	Synergy	3.43638	3.43638	0.276873	0.485627
At44	100	Mixed	Synergy	12.1306	12.1306	4.22034	9.17983
At44	0.01	Protein	Additive	2.95075	4.59257	0.0355789
At44	0.1	Protein	Additive	2.95075	5.11555	0.708064
At44	1	Protein	Additive	2.95075	4.63058	2.05159
At44	10	Protein	Additive	2.95075	6.56696	0.721923
At44	100	Protein	Additive	2.95075	20.4588	5.27924
At44	0.01	Sugar	Additive	1.64182	2.95075
At44	0.1	Sugar	Additive	2.16479	2.95075
At44	1	Sugar	Additive	1.67982	2.95075
At44	10	Sugar	Additive	3.6162	2.95075
At44	100	Sugar	Additive	17.5081	2.95075

## Sheet: 1B_At44 Sucrose
Sample	Ratio	Protectant	Calculation	Protection	Protect_add	Stdev	%Synergy
At44	0.01	Mixed	Synergy	3.01603	3.01603	0.631427	0.0652778
At44	0.1	Mixed	Synergy	2.62617	2.62617	0.678146	-0.324585
At44	1	Mixed	Synergy	1.49448	1.49448	0.820562	-1.45628
At44	10	Mixed	Synergy	3.42671	3.42671	1.11004	0.475956
At44	100	Mixed	Synergy	10.1175	10.1175	1.19179	7.16671
At44	0.01	Protein	Additive	2.95075	5.80161	1.4787
At44	0.1	Protein	Additive	2.95075	6.98648	0.964099
At44	1	Protein	Additive	2.95075	5.58553	1.1551
At44	10	Protein	Additive	2.95075	6.74026	2.43598
At44	100	Protein	Additive	2.95075	12.1203	0.878235
At44	0.01	Sugar	Additive	2.85086	2.95075
At44	0.1	Sugar	Additive	4.03572	2.95075
At44	1	Sugar	Additive	2.63478	2.95075
At44	10	Sugar	Additive	3.78951	2.95075
At44	100	Sugar	Additive	9.16959	2.95075

## Sheet: 1B_Aav11 Trehalose
Sample	Ratio	Protectant	Calculation	Protection	Protect_add	Stdev	%Synergy
Aav11	0.01	Mixed	Synergy	1.33528	1.33528	0.0633638	-2.97834
Aav11	0.1	Mixed	Synergy	1.78474	1.78474	0.827087	-2.52889
Aav11	1	Mixed	Synergy	4.07143	4.07143	1.78246	-0.242199
Aav11	10	Mixed	Synergy	6.62159	6.62159	1.42679	2.30797
Aav11	100	Mixed	Synergy	19.0297	19.0297	2.66812	14.716
Aav11	0.01	Protein	Additive	4.31362	4.9861	2.02882
Aav11	0.1	Protein	Additive	4.31362	5.25648	1.78092
Aav11	1	Protein	Additive	4.31362	5.82468	2.76206
Aav11	10	Protein	Additive	4.31362	7.40593	2.60122
Aav11	100	Protein	Additive	4.31362	15.2775	1.511
Aav11	0.01	Sugar	Additive	0.672474	4.31362
Aav11	0.1	Sugar	Additive	0.942851	4.31362
Aav11	1	Sugar	Additive	1.51106	4.31362
Aav11	10	Sugar	Additive	3.09231	4.31362
Aav11	100	Sugar	Additive	10.9639	4.31362

## Sheet: 1B_Aav11 Sucrose
Sample	Ratio	Protectant	Calculation	Protection	Protect_add	Stdev	%Synergy
Aav11	0.01	Mixed	Synergy	3.17016	3.17016	0.658966	-1.14347
Aav11	0.1	Mixed	Synergy	5.093	5.093	3.59864	0.779374
Aav11	1	Mixed	Synergy	5.14984	5.14984	1.76704	0.836218
Aav11	10	Mixed	Synergy	6.43233	6.43233	3.08576	2.1187
Aav11	100	Mixed	Synergy	13.6537	13.6537	0.598631	9.34011
Aav11	0.01	Protein	Additive	4.31362	4.91221	1.69558
Aav11	0.1	Protein	Additive	4.31362	5.10515	1.68702
Aav11	1	Protein	Additive	4.31362	6.08918	3.60963
Aav11	10	Protein	Additive	4.31362	5.56455	2.05784
Aav11	100	Protein	Additive	4.31362	11.6152	2.83332
Aav11	0.01	Sugar	Additive	0.598585	4.31362
Aav11	0.1	Sugar	Additive	0.791521	4.31362
Aav11	1	Sugar	Additive	1.77555	4.31362
Aav11	10	Sugar	Additive	1.25093	4.31362
Aav11	100	Sugar	Additive	7.30162	4.31362

## Sheet: 1B_He11 Trehalose
Sample	Ratio	Protectant	Calculation	Protection	Protect_add	Stdev	%Synergy
He11	0.01	Mixed	Synergy	23.3412	23.3412	1.84873	8.0426
He11	0.1	Mixed	Synergy	28.2056	28.2056	1.99306	12.907
He11	1	Mixed	Synergy	28.1163	28.1163	2.16911	12.8177
He11	10	Mixed	Synergy	40.7823	40.7823	3.59331	25.4837
He11	100	Mixed	Synergy	61.7458	61.7458	3.86469	46.4472
He11	0.01	Protein	Additive	15.2986	16.3469	3.47112
He11	0.1	Protein	Additive	15.2986	16.3761	3.53003
He11	1	Protein	Additive	15.2986	16.6664	3.24922
He11	10	Protein	Additive	15.2986	20.3452	2.78274
He11	100	Protein	Additive	15.2986	61.4806	5.36371
He11	0.01	Sugar	Additive	1.04836	15.2986
He11	0.1	Sugar	Additive	1.07752	15.2986
He11	1	Sugar	Additive	1.36783	15.2986
He11	10	Sugar	Additive	5.0466	15.2986
He11	100	Sugar	Additive	46.182	15.2986

[truncated: 7 more sheets: 1B_He11 Sucrose, 1B_Av11 Trehalose, 1B_Av11 Sucrose, 1B_At20 Trehalose, 1B_At20 Sucrose, figure supplement 1C, figure supplement 1D]
