# Supplementary material for: Disordered proteins interact with the chemical environment to tune their protective function during drying
Source: eLife. 2024 Nov 19;13:RP97231. doi: 10.7554/eLife.97231 (PMC11575898; doi:10.7554/eLife.97231)
Supplement: Figure 1—source data 2. [file elife-97231-fig1-data2.xlsx]

## Sheet: 1C_Example Plot
Sample	Protectant	Calculation	Protection	Protect_add	Percent_Synergy	Stdev
Protein1	Mixed	Synergy	40	40	0	2.5
Protein2	Mixed	Synergy	80	80	40	2.5
Protein3	Mixed	Synergy	10	10	-30	2.5
Protein1	Protein	Additive	30	40		2.5
Protein2	Protein	Additive	30	40		2.5
Protein3	Protein	Additive	30	40		2.5
Protein1	Sugar	Additive	10	30
Protein2	Sugar	Additive	10	30
Protein3	Sugar	Additive	10	30

## Sheet: 1D_Peptide_Trehalose
Sample	Protectant	Calculation	Protection	Protect_add	Percent_Synergy	Stdev
At11	Mixed	Synergy	31.3686	31.3686	-13.4801	1.73705
At22	Mixed	Synergy	16.0639	16.0639	-29.6397	0.347802
At44	Mixed	Synergy	12.1306	12.1306	-8.32826	4.22034
Av11	Mixed	Synergy	13.8329	13.8329	-28.4385	3.2251
He11	Mixed	Synergy	61.7458	61.7458	0.265212	3.86469
At20	Mixed	Synergy	75.4044	75.4044	34.2399	2.2082
Aav11	Mixed	Synergy	19.0297	19.0297	3.75218	2.66812
At11	Protein	Additive	4.69132	44.8487		6.79662
At22	Protein	Additive	5.38626	45.7036		6.66982
At44	Protein	Additive	2.95075	20.4588		5.27924
Av11	Protein	Additive	5.90812	42.2714		6.11115
He11	Protein	Additive	15.2986	61.4806		5.36371
At20	Protein	Additive	19.6261	41.1645		1.82199
Aav11	Protein	Additive	4.31362	15.2775		1.511
At11	Sugar	Additive	40.1574	4.69132
At22	Sugar	Additive	45.7036	5.38626
At44	Sugar	Additive	17.5081	2.95075
Av11	Sugar	Additive	36.3633	5.90812
He11	Sugar	Additive	46.182	15.2986
At20	Sugar	Additive	21.5385	19.6261
Aav11	Sugar	Additive	10.9639	4.31362

## Sheet: 1E_Peptide_Sucrose
Sample	Protectant	Calculation	Protection	Protect_add	Percent_Synergy	Stdev
At11	Mixed	Synergy	9.02778	9.02778	-5.86675	0.867361
At22	Mixed	Synergy	9.01876	9.01876	-7.16085	2.61164
At44	Mixed	Synergy	10.1175	10.1175	-2.00288	1.19179
Av11	Mixed	Synergy	6.88596	6.88596	-11.274	0.53177
He11	Mixed	Synergy	31.5699	31.5699	4.4527	3.46604
At20	Mixed	Synergy	68.5952	68.5952	36.7784	3.73309
Aav11	Mixed	Synergy	13.6537	13.6537	2.03848	0.598631
At11	Protein	Additive	4.69132	14.8945		2.10132
At22	Protein	Additive	5.38626	16.1796		0.606498
At44	Protein	Additive	2.95075	12.1203		0.878235
Av11	Protein	Additive	5.90812	18.1599		4.40835
He11	Protein	Additive	15.2986	27.1172		6.42907
At20	Protein	Additive	19.6261	31.8168		1.66774
Aav11	Protein	Additive	4.31362	11.6152		2.83332
At11	Sugar	Additive	10.2032	4.69132
At22	Sugar	Additive	9.01876	5.38626
At44	Sugar	Additive	9.16959	2.95075
Av11	Sugar	Additive	12.2518	5.90812
He11	Sugar	Additive	11.8187	15.2986
At20	Sugar	Additive	12.1907	19.6261
Aav11	Sugar	Additive	7.30162	4.31362

## Sheet: 1F
Peptide	%synergy_tre	%synergy_tre_err	%synergy_suc	%synergy_suc_err
At11	-13.4801	7.9972	-5.86675	1.96405
At22	-29.6397	6.65123	-7.16085	2.11606
At44	-8.32826	5.91899	-2.00288	2.05867
Aav11	3.75218	2.62824	2.03848	3.138
He11	0.265212	6.46125	4.4527	7.93914
Av11	-28.4385	6.53168	-11.274	3.89712
At20	34.2399	1.12137	36.7784	3.55272

## Sheet: Aav11 Trehalose
Samples	Mixture	Type	E1	E2	E3	C1	C2	C3	EC1	EC2	EC3	Average	Stdev
Control	Control	Control	-0.0001	-4e-05	-8e-05	-0.0075	-0.0066	-0.0075	1.33333	0.606061	1.06667	1.00202	0.367921
Aav11	Aav11	Aav11	-0.0005	-0.0003	-0.0002	-0.0077	-0.0076	-0.008	6.49351	3.94737	2.5	4.31362	2.02179
A+T 100:1	Trehalose	Trehalose	-6e-05	-4e-05	-6e-05	-0.0084	-0.007	-0.0082	0.714286	0.571429	0.731707	0.672474	0.0879403
A+T 10:1	Trehalose	Trehalose	-4e-05	-0.0001	-7e-05	-0.0074	-0.0076	-0.0072	0.540541	1.31579	0.972222	0.942851	0.388458
A+T 1:1	Trehalose	Trehalose	-0.0002	-0.0001	-8e-05	-0.0085	-0.008	-0.0086	2.35294	1.25	0.930233	1.51106	0.746417
A+T 1:10	Trehalose	Trehalose	-0.0003	-0.0002	-0.0002	-0.0079	-0.0073	-0.0073	3.79747	2.73973	2.73973	3.09231	0.610688
A+T 1:100	Trehalose	Trehalose	-0.0008	-0.0008	-0.0011	-0.008	-0.0083	-0.0083	10	9.63855	13.253	10.9639	1.99069
A+T 100:1	Experimental	Experimental	-0.0001	-0.0001	-0.0001	-0.0077	-0.0077	-0.0071	1.2987	1.2987	1.40845	1.33528	0.0633638
A+T 10:1	Experimental	Experimental	-0.0001	-0.0002	-0.0001	-0.0077	-0.0073	-0.0076	1.2987	2.73973	1.31579	1.78474	0.827087
A+T 1:1	Experimental	Experimental	-0.0005	-0.0002	-0.0003	-0.0083	-0.0079	-0.0082	6.0241	2.53165	3.65854	4.07143	1.78246
A+T 1:10	Experimental	Experimental	-0.0006	-0.0005	-0.0004	-0.0074	-0.0077	-0.0076	8.10811	6.49351	5.26316	6.62159	1.42679		t-test
A+T 1:100	Experimental	Experimental	-0.0017	-0.0016	-0.0014	-0.0078	-0.0085	-0.0085	21.7949	18.8235	16.4706	19.0297	2.66812
A+T 100:1	Predicted	Predicted							7.20779	4.5188	3.23171	4.9861	2.02882		0.0892138
A+T 10:1	Predicted	Predicted							7.03405	5.26316	3.47222	5.25648	1.78092		0.0593906
A+T 1:1	Predicted	Predicted							8.84645	5.19737	3.43023	5.82468	2.76206		0.41605
A+T 1:10	Predicted	Predicted							10.291	6.68709	5.23973	7.40593	2.60122		0.677187
A+T 1:100	Predicted	Predicted							16.4935	13.5859	15.753	15.2775	1.511		0.119562
Synergy Calculations
1:100 predicted	1:100 exp	% synergy	Avg % synergy	STD
16.4935	21.7949	5.30137	3.75218	2.62824
13.5859	18.8235	5.23761
15.753	16.4706	0.717576

## Sheet: Aav11 Sucrose
Samples	Mixture	Type	E1	E2	E3	C1	C2	C3	EC1	EC2	EC3	Average	Stdev
Control	Control	Control	-0.0001	-4e-05	-8e-05	-0.0075	-0.0066	-0.0075	1.33333	0.606061	1.06667	1.00202	0.367921
Aav11	Aav11	Aav11	-0.0005	-0.0003	-0.0002	-0.0077	-0.0076	-0.008	6.49351	3.94737	2.5	4.31362	2.02179
A+S 100:1	Sucrose	Sucrose	-1e-05	-8e-05	-6e-05	-0.0083	-0.0084	-0.0083	0.120482	0.952381	0.722892	0.598585	0.429655
A+S 10:1	Sucrose	Sucrose	-4e-05	-5e-05	-0.0001	-0.0079	-0.0083	-0.0079	0.506329	0.60241	1.26582	0.791521	0.413558
A+S 1:1	Sucrose	Sucrose	-0.0003	-3e-05	-0.0001	-0.008	-0.0084	-0.0082	3.75	0.357143	1.21951	1.77555	1.76345
A+S 1:10	Sucrose	Sucrose	-0.0001	-0.0001	-0.0001	-0.0077	-0.0082	-0.0081	1.2987	1.21951	1.23457	1.25093	0.0420529
A+S 1:100	Sucrose	Sucrose	-0.0006	-0.0005	-0.0005	-0.0075	-0.0066	-0.0079	8	7.57576	6.32911	7.30162	0.86852
A+S 100:1	Experimental	Experimental	-0.0002	-0.0003	-0.0003	-0.0083	-0.0084	-0.0085	2.40964	3.57143	3.52941	3.17016	0.658966
A+S 10:1	Experimental	Experimental	-0.0003	-0.0008	-0.0002	-0.0083	-0.0087	-0.0081	3.61446	9.1954	2.46914	5.093	3.59864
A+S 1:1	Experimental	Experimental	-0.0006	-0.0003	-0.0004	-0.0085	-0.0084	-0.0083	7.05882	3.57143	4.81928	5.14984	1.76704
A+S 1:10	Experimental	Experimental	-0.0008	-0.0003	-0.0005	-0.0082	-0.0082	-0.0085	9.7561	3.65854	5.88235	6.43233	3.08576		t-test
A+S 1:100	Experimental	Experimental	-0.0011	-0.0012	-0.0011	-0.0084	-0.0084	-0.0081	13.0952	14.2857	13.5802	13.6537	0.598631
A+S 100:1	Predicted	Predicted							6.61399	4.89975	3.22289	4.91221	1.69558		0.209905
A+S 10:1	Predicted	Predicted							6.99984	4.54978	3.76582	5.10515	1.68702		0.996126
A+S 1:1	Predicted	Predicted							10.2435	4.30451	3.71951	6.08918	3.60963		0.713548
A+S 1:10	Predicted	Predicted							7.79221	5.16688	3.73457	5.56455	2.05784		0.70892
A+S 1:100	Predicted	Predicted							14.4935	11.5231	8.82911	11.6152	2.83332		0.338283
Synergy Calculations
1:100 predicted	1:100 exp	% synergy	Avg % synergy	STD
14.4935	13.0952	-1.39827	2.03848	3.138
11.5231	14.2857	2.76259
8.82911	13.5802	4.75113

## Sheet: Av11 Trehalose
Samples	Mixture	Type	E1	E2	E3	C1	C2	C3	EC1	EC2	EC3	Average	Stdev
Control	Control	Control	-2e-05	-1e-05	-8e-05	-0.0071	-0.0075	-0.0079	0.28169	0.133333	1.01266	0.475894	0.470733
Av11	Av11	Av11	-0.0004	-0.0003	-0.0007	-0.008	-0.008	-0.0078	5	3.75	8.97436	5.90812	2.728
A+T 100:1	Trehalose	Trehalose	-3e-05	-4e-05	-0.0002	-0.0079	-0.0079	-0.0077	0.379747	0.506329	2.5974	1.16116	1.24543
A+T 10:1	Trehalose	Trehalose	-0.0002	-0.0002	-0.0001	-0.0082	-0.0082	-0.0083	2.43902	2.43902	1.20482	2.02762	0.712569
A+T 1:1	Trehalose	Trehalose	-0.0001	-0.0001	-0.0001	-0.0086	-0.0083	-0.0083	1.16279	1.20482	1.20482	1.19081	0.0242652
A+T 1:10	Trehalose	Trehalose	-0.0002	-0.0003	-0.0003	-0.0085	-0.0084	-0.0083	2.35294	3.57143	3.61446	3.17961	0.716239
A+T 1:100	Trehalose	Trehalose	-0.0025	-0.0035	-0.0033	-0.0082	-0.0087	-0.0086	30.4878	40.2299	38.3721	36.3633	5.17239
A+T 100:1	Experimental	Experimental	-0.0003	-0.0002	-0.0002	-0.008	-0.0083	-0.0085	3.75	2.40964	2.35294	2.83753	0.790733
A+T 10:1	Experimental	Experimental	-0.0003	-0.0002	-0.0002	-0.0084	-0.0086	-0.0087	3.57143	2.32558	2.29885	2.73195	0.72713
A+T 1:1	Experimental	Experimental	-0.0004	-0.0006	-0.0004	-0.0085	-0.0085	-0.0083	4.70588	7.05882	4.81928	5.52799	1.32695
A+T 1:10	Experimental	Experimental	-0.0006	-0.0006	-0.0005	-0.0086	-0.0085	-0.0085	6.97674	7.05882	5.88235	6.63931	0.656825		t-test
A+T 1:100	Experimental	Experimental	-0.0012	-0.0013	-0.0011	-0.0085	-0.0091	-0.0084	14.1176	14.2857	13.0952	13.8329	3.2251
A+T 100:1	Predicted	Predicted							5.37975	4.25633	11.5718	7.06928	3.93951		0.200188
A+T 10:1	Predicted	Predicted							7.43902	6.18902	10.1792	7.93574	2.04093		0.0357334
A+T 1:1	Predicted	Predicted							6.16279	4.95482	10.1792	7.09893	2.7351		0.438941
A+T 1:10	Predicted	Predicted							7.35294	7.32143	12.5888	9.08773	3.03207		0.29516
A+T 1:100	Predicted	Predicted							35.4878	43.9799	47.3465	42.2714	6.11115		0.0142625
Synergy Calculations
1:100 predicted	1:100 exp	% synergy	Avg % synergy	STD
35.4878	14.1176	-21.3702	-28.4385	6.53168
43.9799	14.2857	-29.6942
47.3465	13.0952	-34.2512

## Sheet: Av11 Sucrose
Samples	Mixture	Type	E1	E2	E3	C1	C2	C3	EC1	EC2	EC3	Average	Stdev
Control	Control	Control	-2e-05	-1e-05	-8e-05	-0.0071	-0.0075	-0.0079	0.28169	0.133333	1.01266	0.475894	0.470733
Av11	Av11	Av11	-0.0004	-0.0003	-0.0007	-0.008	-0.008	-0.0078	5	3.75	8.97436	5.90812	2.728
A+S 100:1	Sucrose	Sucrose	-8e-05	-0.0001	-0.0001	-0.008	-0.008	-0.0081	1	1.25	1.23457	1.16152	0.140095
A+S 10:1	Sucrose	Sucrose	-0.0001	-9e-05	-8e-06	-0.0081	-0.008	-0.0081	1.23457	1.125	0.0987654	0.819444	0.626526
A+S 1:1	Sucrose	Sucrose	-0.0004	-0.0002	-0.0002	-0.0074	-0.0077	-0.0075	5.40541	2.5974	2.66667	3.55649	1.60158
A+S 1:10	Sucrose	Sucrose	-0.0004	-6e-05	-6e-05	-0.0077	-0.0071	-0.0075	5.19481	0.84507	0.8	2.27996	2.52443
A+S 1:100	Sucrose	Sucrose	-0.0009	-0.0008	-0.0011	-0.0076	-0.0074	-0.0078	11.8421	10.8108	14.1026	12.2518	1.68369
A+S 100:1	Experimental	Experimental	-0.0002	-0.0002	-0.0001	-0.0081	-0.0084	-0.0086	2.46914	2.38095	1.16279	2.00429	0.730095
A+S 10:1	Experimental	Experimental	-0.0001	-0.0002	-0.0001	-0.0079	-0.0079	-0.0081	1.26582	2.53165	1.23457	1.67735	0.740011
A+S 1:1	Experimental	Experimental	-0.0003	-9e-05	-0.0001	-0.0082	-0.0079	-0.0082	3.65854	1.13924	1.21951	2.00576	1.43191
A+S 1:10	Experimental	Experimental	-0.0006	-0.0004	-0.0003	-0.0079	-0.0076	-0.0079	7.59494	5.26316	3.79747	5.55185	1.91512		t-test
A+S 1:100	Experimental	Experimental	-0.0005	-0.0005	-0.0006	-0.0076	-0.0076	-0.008	6.57895	6.57895	7.5	6.88596	0.53177
A+S 100:1	Predicted	Predicted							6	5	10.2089	7.06964	2.7643		0.0779979	NS
A+S 10:1	Predicted	Predicted							6.23457	4.875	9.07312	6.72756	2.14204		0.0430949	*
A+S 1:1	Predicted	Predicted							10.4054	6.3474	11.641	9.46461	2.76937		0.0255569	*
A+S 1:10	Predicted	Predicted							10.1948	4.59507	9.77436	8.18808	3.11873		0.292912	NS
A+S 1:100	Predicted	Predicted							16.8421	14.5608	23.0769	18.1599	4.40835		0.0455687	*
Synergy Calculations
1:100 predicted	1:100 exp	% synergy	Avg % synergy	STD
16.8421	6.57895	-10.2632	-11.274	3.89712
14.5608	6.57895	-7.98186
23.0769	7.5	-15.5769

## Sheet: At20 Trehalose
Samples	Mixture	Type	E1	E2	E3	C1	C2	C3	EC1	EC2	EC3	Average	Stdev
Control	Control	Control	-9e-05	-6e-05	-2e-05	-0.0059	-0.0058	-0.0056	1.52542	1.03448	0.357143	0.97235	0.586614
At20	At20	At20	-0.0012	-0.0013	-0.0012	-0.006	-0.0062	-0.0067	20	20.9677	17.9104	19.6261	1.56257
A+T 100:1	Trehalose	Trehalose	-0.0002	-4e-05	-7e-05	-0.0064	-0.0055	-0.0059	3.125	0.727273	1.18644	1.67957	1.27266
A+T 10:1	Trehalose	Trehalose	-8e-06	-0.0001	-0.0002	-0.0066	-0.0062	-0.0056	0.121212	1.6129	3.57143	1.76851	1.73036
A+T 1:1	Trehalose	Trehalose	-0.0002	-0.0002	-0.0002	-0.0073	-0.0068	-0.0065	2.73973	2.94118	3.07692	2.91928	0.169662
A+T 1:10	Trehalose	Trehalose	-0.0003	-0.0004	-0.0004	-0.0065	-0.0066	-0.0065	4.61538	6.06061	6.15385	5.60995	0.862576
A+T 1:100	Trehalose	Trehalose	-0.0015	-0.0013	-0.0014	-0.0065	-0.0065	-0.0065	23.0769	20	21.5385	21.5385	1.53846
A+T 100:1	Experimental	Experimental	-0.0013	-0.0013	-0.0016	-0.0064	-0.0063	-0.0061	20.3125	20.6349	26.2295	22.3923	3.32702
A+T 10:1	Experimental	Experimental	-0.0018	-0.0015	-0.002	-0.007	-0.0064	-0.0067	25.7143	23.4375	29.8507	26.3342	3.25125
A+T 1:1	Experimental	Experimental	-0.0016	-0.0013	-0.0016	-0.0066	-0.0073	-0.0068	24.2424	17.8082	23.5294	21.86	3.52702
A+T 1:10	Experimental	Experimental	-0.0026	-0.0023	-0.0022	-0.007	-0.0054	-0.0061	37.1429	42.5926	36.0656	38.6003	3.4991		t-test
A+T 1:100	Experimental	Experimental	-0.0053	-0.0051	-0.0058	-0.0068	-0.0069	-0.0078	77.9412	73.913	74.359	75.4044	2.2082
A+T 100:1	Predicted	Predicted							23.125	21.695	19.0969	21.3056	2.04209		0.659727
A+T 10:1	Predicted	Predicted							20.1212	22.5806	21.4819	21.3946	1.23204		0.105313
A+T 1:1	Predicted	Predicted							22.7397	23.9089	20.9874	22.5453	1.47044		0.111311
A+T 1:10	Predicted	Predicted							24.6154	27.0283	24.0643	25.236	1.57648		0.0113267
A+T 1:100	Predicted	Predicted							43.0769	40.9677	39.4489	41.1645	1.82199		4.21837e-05
Synergy Calculations
1:100 predicted	1:100 exp	% synergy	Avg % synergy	STD			1:10 predicted	1:10 exp	% synergy	Avg % synergy	STD
43.0769	77.9412	34.8643	34.2399	1.12137			24.6154	37.1429	12.5275	13.3643	1.92326
40.9677	73.913	32.9453					27.0283	42.5926	15.5642
39.4489	74.359	34.9101					24.0643	36.0656	12.0013
1:10 predicted	1:10 exp	% synergy	Avg % synergy	STD
24.6154	37.1429	12.5275	13.3643	1.92326
27.0283	42.5926	15.5642
24.0643	36.0656	12.0013

## Sheet: At20 Sucrose
Samples	Mixture	Type	E1	E2	E3	C1	C2	C3	EC1	EC2	EC3	Average	Stdev
Control	Control	Control	-9e-05	-6e-05	-2e-05	-0.0059	-0.0058	-0.0056	1.52542	1.03448	0.357143	0.97235	0.586614
At20	At20	At20	-0.0012	-0.0013	-0.0012	-0.006	-0.0062	-0.0067	20	20.9677	17.9104	19.6261	1.56257
A+S 100:1	Sucrose	Sucrose	-0.0001	-0.0004	-0.0001	-0.0076	-0.0074	-0.0074	1.31579	5.40541	1.35135	2.69085	2.35094
A+S 10:1	Sucrose	Sucrose	-0.0001	-0.0002	-8e-05	-0.0075	-0.0073	-0.0079	1.33333	2.73973	1.01266	1.69524	0.918653
A+S 1:1	Sucrose	Sucrose	-0.0001	-0.0002	-0.0003	-0.0083	-0.0075	-0.0078	1.20482	2.66667	3.84615	2.57255	1.32318
A+S 1:10	Sucrose	Sucrose	-0.0004	-0.0003	-0.0004	-0.0073	-0.008	-0.0072	5.47945	3.75	5.55556	4.92834	1.02118
A+S 1:100	Sucrose	Sucrose	-0.0008	-0.0008	-0.0012	-0.0076	-0.0078	-0.0076	10.5263	10.2564	15.7895	12.1907	3.11952
A+S 100:1	Experimental	Experimental	-0.002	-0.002	-0.0019	-0.0075	-0.0079	-0.0077	26.6667	25.3165	24.6753	25.5528	1.01649
A+S 10:1	Experimental	Experimental	-0.0019	-0.0018	-0.0018	-0.0075	-0.008	-0.0082	25.3333	22.5	21.9512	23.2615	1.8151
A+S 1:1	Experimental	Experimental	-0.0018	-0.002	-0.0019	-0.008	-0.0081	-0.0076	22.5	24.6914	25	24.0638	1.36304
A+S 1:10	Experimental	Experimental	-0.0031	-0.0027	-0.0026	-0.0076	-0.0074	-0.0077	40.7895	36.4865	33.7662	37.0141	3.54122		t-test
A+S 1:100	Experimental	Experimental	-0.0053	-0.0045	-0.0051	-0.0075	-0.007	-0.0072	70.6667	64.2857	70.8333	68.5952	3.73309
A+S 100:1	Predicted	Predicted							21.3158	26.3731	19.2618	22.3169	3.65985		0.26201
A+S 10:1	Predicted	Predicted							21.3333	23.7075	18.9231	21.3213	2.3922		0.329943
A+S 1:1	Predicted	Predicted							21.2048	23.6344	21.7566	22.1986	1.27368		0.158689
A+S 1:10	Predicted	Predicted							25.4795	24.7177	23.466	24.5544	1.01661		0.0193923
A+S 1:100	Predicted	Predicted							30.5263	31.2242	33.6999	31.8168	1.66774		0.000887417
Synergy Calculations
1:100 predicted	1:100 exp	% synergy	Avg % synergy	STD			1:10 predicted	1:10 exp	% synergy	Avg % synergy	STD
30.5263	70.6667	40.1404	36.7784	3.55272			25.4795	40.7895	15.31	12.4597	2.57537
31.2242	64.2857	33.0616					24.7177	36.4865	11.7687
33.6999	70.8333	37.1334					23.466	33.7662	10.3002
1:10 predicted	1:10 exp	% synergy	Avg % synergy	STD
25.4795	40.7895	15.31	12.4597	2.57537
24.7177	36.4865	11.7687
23.466	33.7662	10.3002

[truncated: 8 more sheets: He11 Trehalose, He11 Sucrose, At22 Trehalose, At22 Sucrose, At44 Trehalose, At44 Sucrose, At11 Trehalose, At11 Sucrose]
