# Supplementary material for: Disordered proteins interact with the chemical environment to tune their protective function during drying
Source: eLife. 2024 Nov 19;13:RP97231. doi: 10.7554/eLife.97231 (PMC11575898; doi:10.7554/eLife.97231)
Supplement: Figure 2—figure supplement 1—source data 1. [file elife-97231-fig2-figsupp1-data1.xlsx]

## Sheet: figure supplement 1A
Concentration (mg/ml)	HeLEA68614	HeLEA68614	HeLEA68614	AvLEA1C	AvLEA1C	AvLEA1C	BSA	BSA	BSA	AtLEA3-3	AtLEA3-3	AtLEA3-3	AavLEA1	AavLEA1	AavLEA1	AtLEA4-2	AtLEA4-2	AtLEA4-2	Trehalose	Trehalose	Trehalose	Sucrose	Sucrose	Sucrose	CAHS D	CAHS D	CAHS D
20	105.063	100	101.22
15	95.4023	97.7011	98.8506
10	94.5652	100	98.7952
5	93.9759	92.7711	94.2529
2	73.8095	85.7143	71.0843
1	30.3797	27.8481	37.931
0.5	22.7848	25.2874	24.7059
0.1	17.4419	17.9775	18.2927
0.05	13.4146	10.7143	10.7143
0.01	6.09756	9.09091	4.7619
0	2.32558	3.65854	1.23457
20				100	101.205	98.7952
15				95.4023	102.299	101.136
10				96.5517	97.7273	92.5532
5				91.0112	91.1111	97.7778
2				55.9524	50.5618	50
1				35.1648	28.8889	29.2135
0.5				26.3736	25.5556	23.8636
0.1				19.5402	20.8791	20
0.05				13.9535	12.5	12.6437
0.01				5.68182	5.55556	8.33333
0				2.53165	2.5	2.5641
20							100	100	101.163
15							100	93.2584	93.2584
10							75.2809	77.0115	73.3333
5							36.6667	38.4615	30.3371
2							20.6897	20.6897	21.4286
1							14.1176	16.2791	11.6279
0.5							8.04598	5.74713	4.7619
0.1							3.61446	4.70588	4.54545
0.05							4.87805	4.87805	3.61446
0.01							1.20482	3.52941	2.29885
0							2.35294	2.38095	1.14943
20										100	103.125	95.5224
15										97.3333	89.6104	91.6667
10										91.0448	88.4615	92.7536
5										58.8235	66.6667	67.6923
2										38.2716	27.1429	22.5352
1										16.4179	13.8889	12.6761
0.5										9.33333	9.45946	11.5942
0.1										9.67742	6.77966	11.4754
0.05										12.9032	6.89655	5
0.01										0.327869	1.2069	1.5873
0										0.147059	1.5873	0.746269
20													102.381	98.8235	101.176
15													100	101.19	102.381
10													64.7059	64.7059	58.6207
5													40.6977	32.9412	32.5581
2													28.7356	31.0345	29.4118
1													13.9535	15.2941	10.3448
0.5													18.3908	9.1954	14.9425
0.1													9.09091	10.4651	6.81818
0.05													10.9756	8.13953	7.05882
0.01													3.57143	4.7619	6.0241
0													3.65854	2.43902	2.43902
20																97.6744	96.7033	103.529
15																91.954	96.5517	93.1818
10																52.9412	50	51.1905
5																34.8837	40	35.7143
2																21.1765	23.5294	18.8235
1																17.8571	13.6364	17.4419
0.5																16.2791	12.9412	14.6067
0.1																10.4651	11.6279	7.05882
0.05																5.95238	4.70588	2.46914
0.01																3.48837	4.5977	3.57143
0																2.40964	2.38095	4.70588
20																			82.8947	88.3117	85.5263
15																			67.8571	56.1644	58.4416
10																			27.2727	25.3165	23.4568
5																			12.6582	11.25	11.25
2																			6.17284	6.41026	6.09756
1																			3.65854	4.7619	3.84615
0.5																			1.26582	4.93827	1.07143
0.1																			1.26582	0.779221	1.13924
0.05																			1.25	0.897436	1.11111
0.01																			0.759494	0.632911	1.05882
0																			1.19048	0.864198	1.21951
20																						34.2105	26.3158	31.5789
15																						15.5844	15.2778	14.2857
10																						13.5135	12.1622	14.2857
5																						14.0845	7.79221	7.69231
2																						8	8.10811	9.33333
1																						4.22535	5.40541	5
0.5																						2.66667	2.73973	5.55556
0.1																						0.821918	5.47945	2.8169
0.05																						2.66667	1.36986	1.40845
0.01																						0.675676	1.35135	2.66667
0																						1.42857	1.35135	1.35135
20																									103.629	86.7185	76.4683
15																									98.2547	104.153	88.2703
10																									82.0936	83.5192	79.3137
5																									84.3301	69.8033	74.6009
2																									58.4712	56.5704	63.5748
1																									54.185	48.745	56.4821
0.5																									46.7284	39.2377	45.7151
0.1																									11.9129	13.7654	17.7964
0.05																									8.73588	4.82718	0.455798
0.01																									7.32576	0.879843	-3.77275

## Sheet: 1B_AtLEA3-3 Trehalose
Sample	Ratio	Protectant	Calculation	Protection	Protect_add	Stdev	%Synergy
AtLEA3-3	0.01	Mixed	Synergy	36.8254	36.8254	8.67103	5.73915
AtLEA3-3	0.1	Mixed	Synergy	32.7318	32.7318	3.03281	1.64552
AtLEA3-3	1	Mixed	Synergy	31.379	31.379	1.7131	0.292746
AtLEA3-3	10	Mixed	Synergy	41.9416	41.9416	2.51455	10.8554
AtLEA3-3	100	Mixed	Synergy	57.277	57.277	1.62634	26.1907
AtLEA3-3	0.01	Protein	Additive	31.0862	32.1483	2.81864
AtLEA3-3	0.1	Protein	Additive	31.0862	32.2089	2.42402
AtLEA3-3	1	Protein	Additive	31.0862	33.3846	1.09834
AtLEA3-3	10	Protein	Additive	31.0862	36.4466	3.18974
AtLEA3-3	100	Protein	Additive	31.0862	42.2434	3.45207
AtLEA3-3	0.01	Sugar	Additive	1.06205	31.0862
AtLEA3-3	0.1	Sugar	Additive	1.12261	31.0862
AtLEA3-3	1	Sugar	Additive	2.29838	31.0862
AtLEA3-3	10	Sugar	Additive	5.3604	31.0862
AtLEA3-3	100	Sugar	Additive	11.1572	31.0862

## Sheet: 1B_AtLEA3-3 Sucrose
Sample	Ratio	Protectant	Calculation	Protection	Protect_add	Stdev	%Synergy
AtLEA3-3	0.01	Mixed	Synergy	26.5279	26.5279	3.26049	-4.55839
AtLEA3-3	0.1	Mixed	Synergy	31.0748	31.0748	0.931434	-0.0114108
AtLEA3-3	1	Mixed	Synergy	30.9851	30.9851	1.30678	-0.101137
AtLEA3-3	10	Mixed	Synergy	42.5703	42.5703	3.18762	11.4841
AtLEA3-3	100	Mixed	Synergy	57.1528	57.1528	1.30823	26.0665
AtLEA3-3	0.01	Protein	Additive	31.0862	31.929	2.70598
AtLEA3-3	0.1	Protein	Additive	31.0862	34.0027	2.45731
AtLEA3-3	1	Protein	Additive	31.0862	34.0903	2.05258
AtLEA3-3	10	Protein	Additive	31.0862	34.6661	1.89359
AtLEA3-3	100	Protein	Additive	31.0862	38.1623	2.34045
AtLEA3-3	0.01	Sugar	Additive	0.842796	31.0862
AtLEA3-3	0.1	Sugar	Additive	2.91642	31.0862
AtLEA3-3	1	Sugar	Additive	3.00402	31.0862
AtLEA3-3	10	Sugar	Additive	3.5799	31.0862
AtLEA3-3	100	Sugar	Additive	7.07602	31.0862

## Sheet: 1B_AavLEA1 Trehalose
Sample	Ratio	Protectant	Calculation	Protection	Protect_add	Stdev	%Synergy
AavLEA1	0.01	Mixed	Synergy	19.7199	19.7199	2.05886	-0.0386898
AavLEA1	0.1	Mixed	Synergy	22.4797	22.4797	4.01105	2.72119
AavLEA1	1	Mixed	Synergy	21.5562	21.5562	1.98346	1.79768
AavLEA1	10	Mixed	Synergy	23.1389	23.1389	3.80089	3.38035
AavLEA1	100	Mixed	Synergy	53.2739	53.2739	5.10405	33.5153
AavLEA1	0.01	Protein	Additive	19.7585	22.6152	1.29953
AavLEA1	0.1	Protein	Additive	19.7585	22.9977	1.93902
AavLEA1	1	Protein	Additive	19.7585	22.1983	1.57077
AavLEA1	10	Protein	Additive	19.7585	23.4203	1.51633
AavLEA1	100	Protein	Additive	19.7585	32.2418	2.03736
AavLEA1	0.01	Sugar	Additive	2.85666	19.7585
AavLEA1	0.1	Sugar	Additive	3.23918	19.7585
AavLEA1	1	Sugar	Additive	2.43974	19.7585
AavLEA1	10	Sugar	Additive	3.66181	19.7585
AavLEA1	100	Sugar	Additive	12.4832	19.7585

## Sheet: 1B_AavLEA1 Sucrose
Sample	Ratio	Protectant	Calculation	Protection	Protect_add	Stdev	%Synergy
AavLEA1	0.01	Mixed	Synergy	22.7321	22.7321	3.01947	2.97354
AavLEA1	0.1	Mixed	Synergy	21.6038	21.6038	2.55275	1.84528
AavLEA1	1	Mixed	Synergy	23.6581	23.6581	2.1741	3.89958
AavLEA1	10	Mixed	Synergy	26.8822	26.8822	2.67222	7.12364
AavLEA1	100	Mixed	Synergy	40.6066	40.6066	2.80173	20.8481
AavLEA1	0.01	Protein	Additive	19.7585	22.1993	1.70119
AavLEA1	0.1	Protein	Additive	19.7585	22.6349	1.29883
AavLEA1	1	Protein	Additive	19.7585	23.4408	0.760565
AavLEA1	10	Protein	Additive	19.7585	23.021	1.97201
AavLEA1	100	Protein	Additive	19.7585	29.2406	0.711273
AavLEA1	0.01	Sugar	Additive	2.44075	19.7585
AavLEA1	0.1	Sugar	Additive	2.8764	19.7585
AavLEA1	1	Sugar	Additive	3.68229	19.7585
AavLEA1	10	Sugar	Additive	3.26243	19.7585
AavLEA1	100	Sugar	Additive	9.48208	19.7585

## Sheet: 1B_HeLEA Trehalose
Sample	Ratio	Protectant	Calculation	Protection	Protect_add	Stdev	%Synergy
HeLEA	0.01	Mixed	Synergy	30.1853	30.1853	4.13955	-2.31764
HeLEA	0.1	Mixed	Synergy	31.259	31.259	1.85436	-1.24396
HeLEA	1	Mixed	Synergy	34.9051	34.9051	1.41393	2.40213
HeLEA	10	Mixed	Synergy	46.7279	46.7279	1.52162	14.2249
HeLEA	100	Mixed	Synergy	59.3236	59.3236	1.76073	26.8206
HeLEA	0.01	Protein	Additive	32.503	35.0846	2.79937
HeLEA	0.1	Protein	Additive	32.503	34.9724	1.45254
HeLEA	1	Protein	Additive	32.503	35.3686	2.96116
HeLEA	10	Protein	Additive	32.503	35.8175	2.16052
HeLEA	100	Protein	Additive	32.503	42.2763	1.96228
HeLEA	0.01	Sugar	Additive	2.58161	32.503
HeLEA	0.1	Sugar	Additive	2.46939	32.503
HeLEA	1	Sugar	Additive	2.8656	32.503
HeLEA	10	Sugar	Additive	3.31452	32.503
HeLEA	100	Sugar	Additive	9.77336	32.503

## Sheet: 1B_HeLEA Sucrose
Sample	Ratio	Protectant	Calculation	Protection	Protect_add	Stdev	%Synergy
HeLEA	0.01	Mixed	Synergy	28.3995	28.3995	2.59929	-4.10353
HeLEA	0.1	Mixed	Synergy	29.8166	29.8166	2.01624	-2.68634
HeLEA	1	Mixed	Synergy	35.0449	35.0449	1.97727	2.54195
HeLEA	10	Mixed	Synergy	38.5192	38.5192	3.81967	6.01625
HeLEA	100	Mixed	Synergy	43.4734	43.4734	2.60926	10.9704
HeLEA	0.01	Protein	Additive	32.503	33.8614	0.95057
HeLEA	0.1	Protein	Additive	32.503	34.9154	2.68829
HeLEA	1	Protein	Additive	32.503	35.42	1.85452
HeLEA	10	Protein	Additive	32.503	35.8164	1.52647
HeLEA	100	Protein	Additive	32.503	39.6882	1.81374
HeLEA	0.01	Sugar	Additive	1.35841	32.503
HeLEA	0.1	Sugar	Additive	2.41237	32.503
HeLEA	1	Sugar	Additive	2.91706	32.503
HeLEA	10	Sugar	Additive	3.31339	32.503
HeLEA	100	Sugar	Additive	7.18519	32.503

## Sheet: 1B_AvLEA1C Trehalose
Sample	Ratio	Protectant	Calculation	Protection	Protect_add	Stdev	%Synergy
AvLEA1C	0.01	Mixed	Synergy	52.057	52.057	5.69718	6.09894
AvLEA1C	0.1	Mixed	Synergy	54.9578	54.9578	8.21874	8.99973
AvLEA1C	1	Mixed	Synergy	50.042	50.042	3.28624	4.08395
AvLEA1C	10	Mixed	Synergy	52.1705	52.1705	5.34611	6.21239
AvLEA1C	100	Mixed	Synergy	55.7997	55.7997	3.8988	9.84159
AvLEA1C	0.01	Protein	Additive	45.9581	48.5942	2.28545
AvLEA1C	0.1	Protein	Additive	45.9581	48.1961	2.82818
AvLEA1C	1	Protein	Additive	45.9581	48.4728	1.56457
AvLEA1C	10	Protein	Additive	45.9581	49.3206	2.09397
AvLEA1C	100	Protein	Additive	45.9581	53.3236	2.1989
AvLEA1C	0.01	Sugar	Additive	2.6361	45.9581
AvLEA1C	0.1	Sugar	Additive	2.23801	45.9581
AvLEA1C	1	Sugar	Additive	2.51473	45.9581
AvLEA1C	10	Sugar	Additive	3.36253	45.9581
AvLEA1C	100	Sugar	Additive	7.3655	45.9581

## Sheet: 1B_AvLEA1C Sucrose
Sample	Ratio	Protectant	Calculation	Protection	Protect_add	Stdev	%Synergy
AvLEA1C	0.01	Mixed	Synergy	48.1923	48.1923	5.21775	2.23422
AvLEA1C	0.1	Mixed	Synergy	47.8103	47.8103	2.40388	1.85221
AvLEA1C	1	Mixed	Synergy	49.0213	49.0213	4.93479	3.06324
AvLEA1C	10	Mixed	Synergy	52.5635	52.5635	3.41583	6.60543
AvLEA1C	100	Mixed	Synergy	55.0192	55.0192	2.28117	9.06108
AvLEA1C	0.01	Protein	Additive	45.9581	48.068	1.53882
AvLEA1C	0.1	Protein	Additive	45.9581	47.1833	1.43691
AvLEA1C	1	Protein	Additive	45.9581	48.6887	1.54854
AvLEA1C	10	Protein	Additive	45.9581	48.1302	1.20335
AvLEA1C	100	Protein	Additive	45.9581	51.2209	0.838826
AvLEA1C	0.01	Sugar	Additive	2.10989	45.9581
AvLEA1C	0.1	Sugar	Additive	1.22523	45.9581
AvLEA1C	1	Sugar	Additive	2.7306	45.9581
AvLEA1C	10	Sugar	Additive	2.17213	45.9581
AvLEA1C	100	Sugar	Additive	5.26279	45.9581

## Sheet: 1B_AtLEA4-2 Trehalose
Sample	Ratio	Protectant	Calculation	Protection	Protect_add	Stdev	%Synergy
AvLEA4-2	0.01	Mixed	Synergy	16.0114	16.0114	1.25178	-0.460665
AvLEA4-2	0.1	Mixed	Synergy	19.6825	19.6825	1.29862	3.21043
AvLEA4-2	1	Mixed	Synergy	19.2304	19.2304	1.08385	2.7583
AvLEA4-2	10	Mixed	Synergy	21.1765	21.1765	3.11265	4.70436
AvLEA4-2	100	Mixed	Synergy	44.2361	44.2361	4.39147	27.764
AvLEA4-2	0.01	Protein	Additive	16.4721	18.1455	0.884366
AvLEA4-2	0.1	Protein	Additive	16.4721	17.94	0.97313
AvLEA4-2	1	Protein	Additive	16.4721	18.1214	0.745111
AvLEA4-2	10	Protein	Additive	16.4721	19.803	2.14684
AvLEA4-2	100	Protein	Additive	16.4721	38.7266	3.10492
AvLEA4-2	0.01	Sugar	Additive	1.67339	16.4721
AvLEA4-2	0.1	Sugar	Additive	1.46792	16.4721
AvLEA4-2	1	Sugar	Additive	1.64929	16.4721
AvLEA4-2	10	Sugar	Additive	3.33089	16.4721
AvLEA4-2	100	Sugar	Additive	22.2545	16.4721

[truncated: 8 more sheets: 1B_AtLEA4-2 Sucrose, 1B_BSA Trehalose, 1B_BSA Sucrose, 1B_CAHS D Trehalose, 1B_CAHS D Sucrose, figure supplement 1C, figure supplement 1D, figure supplement 1E]
