# Supplementary material for: Disordered proteins interact with the chemical environment to tune their protective function during drying
Source: eLife. 2024 Nov 19;13:RP97231. doi: 10.7554/eLife.97231 (PMC11575898; doi:10.7554/eLife.97231)
Supplement: Figure 2—source data 2. [file elife-97231-fig2-data2.xlsx]

## Sheet: 2C
Sample	Protectant	Calculation	Protection	Protect_add	Percent_Synergy	Stdev
AtLEA3-3	Mixed	Synergy	57.277	57.277	15.0336	1.62634
AtLEA4-2	Mixed	Synergy	44.2361	44.2361	5.50952	4.39147
AvLEA1C	Mixed	Synergy	55.7997	55.7997	2.47609	3.8988
AavLEA1	Mixed	Synergy	53.2739	53.2739	21.0321	5.10405
HeLEA68614	Mixed	Synergy	59.3236	59.3236	17.0472	1.76073
CAHS D	Mixed	Synergy	84.3374	84.3374	42.4982	3.20829
BSA	Mixed	Synergy	49.9939	49.9939	5.06457	4.61556
AtLEA3-3	Protein	Additive	31.0862	42.2434		3.45207
AtLEA4-2	Protein	Additive	16.4721	38.7266		3.10492
AvLEA1C	Protein	Additive	45.9581	53.3236		2.1989
AavLEA1	Protein	Additive	19.7585	32.2418		2.03736
HeLEA68614	Protein	Additive	32.503	42.2763		1.96228
CAHS D	Protein	Additive	41.0962	41.8392		3.01819
BSA	Protein	Additive	29.2228	44.9294		5.9477
AtLEA3-3	Sugar	Additive	11.1572	31.0862
AtLEA4-2	Sugar	Additive	22.2545	16.4721
AvLEA1C	Sugar	Additive	7.3655	45.9581
AavLEA1	Sugar	Additive	12.4832	19.7585
HeLEA68614	Sugar	Additive	9.77336	32.503
CAHS D	Sugar	Additive	0.743022	41.0962
BSA	Sugar	Additive	15.7066	29.2228

## Sheet: 2D
Sample	Protectant	Calculation	Protection	Protect_add	Percent_Synergy	Stdev
AtLEA3-3	Mixed	Synergy	57.277	57.1528	18.9905	1.30823
AtLEA4-2	Mixed	Synergy	44.2361	63.8899	35.9874	4.95753
AvLEA1C	Mixed	Synergy	55.7997	55.0192	3.79829	2.28117
AavLEA1	Mixed	Synergy	53.2739	40.6066	11.366	2.80173
HeLEA68614	Mixed	Synergy	59.3236	43.4734	3.78522	2.60926
CAHS D	Mixed	Synergy	66.8641	66.8641	29.9255	0.939256
BSA	Mixed	Synergy	49.9939	43.7266	1.80229	5.62751
AtLEA3-3	Protein	Additive	31.0862	38.1623		2.34045
AtLEA4-2	Protein	Additive	16.4721	27.9024		0.614806
AvLEA1C	Protein	Additive	45.9581	51.2209		0.838826
AavLEA1	Protein	Additive	19.7585	29.2406		0.711273
HeLEA68614	Protein	Additive	32.503	39.6882		1.81374
CAHS D	Protein	Additive	36.1807	36.9386		3.32173
BSA	Protein	Additive	29.2228	41.9243		7.14732
AtLEA3-3	Sugar	Additive	7.07602	31.0862
AtLEA4-2	Sugar	Additive	11.4303	16.4721
AvLEA1C	Sugar	Additive	5.26279	45.9581
AavLEA1	Sugar	Additive	9.48208	19.7585
HeLEA68614	Sugar	Additive	7.18519	32.503
CAHS D	Sugar	Additive	0.757924	36.1807
BSA	Sugar	Additive	12.7015	29.2228

## Sheet: 2E
prot	%synergy_tre	%synergy_tre_err	%synergy_suc	%synergy_suc_err
AtLEA3-3	15.0336	4.60272	18.9905	3.53446
AtLEA4-2	5.50952	7.20008	35.9874	4.9453
AvLEA1C	2.47609	5.69277	3.79829	2.61934
AavLEA1	21.0321	3.39775	11.366	3.31953
HeLEA68614	17.0472	3.226	3.78522	2.41939
CAHS D	45.966	3.74971	30.7904	1.10635
BSA	5.06457	9.2801	1.80229	8.32151

## Sheet: AtLEA3-3 Trehalose
Samples	Mixture	Type	E1	E2	E3	C1	C2	C3	EC1	EC2	EC3	Average	Stdev
Control	Control	Control	-5e-05	-3e-05	-7e-05	-0.006	-0.0064	-0.0063	0.833333	0.46875	1.11111	0.804398	0.322157
AtLEA3-3	AtLEA3-3	AtLEA3-3	-0.0028	-0.0024	-0.0026	-0.0083	-0.0084	-0.0084	33.7349	28.5714	30.9524	31.0862	2.58436
A+T 100:1	Trehalose	Trehalose	-0.0001	-8e-05	-2e-05	-0.0064	-0.0062	-0.006	1.5625	1.29032	0.333333	1.06205	0.645595
A+T 10:1	Trehalose	Trehalose	-4e-05	-6e-05	-0.0001	-0.006	-0.0058	-0.006	0.666667	1.03448	1.66667	1.12261	0.505791
A+T 1:1	Trehalose	Trehalose	-6e-05	-0.0003	-0.0001	-0.007	-0.0066	-0.0067	0.857143	4.54545	1.49254	2.29838	1.97179
A+T 1:10	Trehalose	Trehalose	-0.0004	-0.0004	-0.0002	-0.0063	-0.0061	-0.0063	6.34921	6.55738	3.1746	5.3604	1.89581
A+T 1:100	Trehalose	Trehalose	-0.0004	-0.0006	-0.0009	-0.0058	-0.0053	-0.0059	6.89655	11.3208	15.2542	11.1572	4.18124
A+T 100:1	Experimental	Experimental	-0.0034	-0.0021	-0.0026	-0.0075	-0.0075	-0.007	45.3333	28	37.1429	36.8254	8.67103
A+T 10:1	Experimental	Experimental	-0.0021	-0.0025	-0.0023	-0.0068	-0.0069	-0.0074	30.8824	36.2319	31.0811	32.7318	3.03281
A+T 1:1	Experimental	Experimental	-0.0023	-0.0023	-0.0022	-0.0075	-0.0069	-0.0073	30.6667	33.3333	30.137	31.379	1.7131
A+T 1:10	Experimental	Experimental	-0.0031	-0.003	-0.0022	-0.007	-0.0071	-0.0056	44.2857	42.2535	39.2857	41.9416	2.51455
A+T 1:100	Experimental	Experimental	-0.004	-0.0042	-0.004	-0.0071	-0.0071	-0.0071	56.338	59.1549	56.338	57.277	1.62634
A+T 100:1	Predicted	Predicted							35.2974	29.8618	31.2857	32.1483	2.81864
A+T 10:1	Predicted	Predicted							34.4016	29.6059	32.619	32.2089	2.42402
A+T 1:1	Predicted	Predicted							34.5921	33.1169	32.4449	33.3846	1.09834
A+T 1:10	Predicted	Predicted							40.0841	35.1288	34.127	36.4466	3.18974
A+T 1:100	Predicted	Predicted							40.6315	39.8922	46.2066	42.2434	3.45207
1:100 Predicted	1:100 Experimental		Percent synergy	Avergare synergy	STD			Multiplicative Synergy	Average	STD
40.6315	56.338		15.7065	15.0336	4.60272			1.38656	1.3629	0.133387
39.8922	59.1549		19.2627					1.48287
46.2066	56.338		10.1314					1.21926

## Sheet: AtLEA3-3 Sucrose
Samples	Mixture	Type	E1	E2	E3	C1	C2	C3	EC1	EC2	EC3	Average	Stdev
Control	Control	Control	-5e-05	-3e-05	-7e-05	-0.006	-0.0064	-0.0063	0.833333	0.46875	1.11111	0.804398	0.322157
AtLEA3-3	AtLEA3-3	AtLEA3-3	-0.0028	-0.0024	-0.0026	-0.0083	-0.0084	-0.0084	33.7349	28.5714	30.9524	31.0862	2.58436
A+S 100:1	Sucrose	Sucrose	-6e-05	-4e-05	-8e-05	-0.0073	-0.0069	-0.0071	0.821918	0.57971	1.12676	0.842796	0.274122
A+S 10:1	Sucrose	Sucrose	-0.0002	-0.0002	-0.0002	-0.0072	-0.0066	-0.0068	2.77778	3.0303	2.94118	2.91642	0.12807
A+S 1:1	Sucrose	Sucrose	-0.0002	-0.0004	-0.0001	-0.0077	-0.0079	-0.0074	2.5974	5.06329	1.35135	3.00402	1.88908
A+S 1:10	Sucrose	Sucrose	-0.0002	-0.0003	-0.0003	-0.0076	-0.0074	-0.0074	2.63158	4.05405	4.05405	3.5799	0.821266
A+S 1:100	Sucrose	Sucrose	-0.0005	-0.0006	-0.0005	-0.0071	-0.0078	-0.0077	7.04225	7.69231	6.49351	7.07602	0.600114
A+S 100:1	Experimental	Experimental	-0.0018	-0.0023	-0.0023	-0.0079	-0.0082	-0.008	22.7848	28.0488	28.75	26.5279	3.26049
A+S 10:1	Experimental	Experimental	-0.0024	-0.0024	-0.0025	-0.0076	-0.008	-0.0079	31.5789	30	31.6456	31.0748	0.931434
A+S 1:1	Experimental	Experimental	-0.0025	-0.0024	-0.0025	-0.0082	-0.008	-0.0077	30.4878	30	32.4675	30.9851	1.30678
A+S 1:10	Experimental	Experimental	-0.0036	-0.0035	-0.003	-0.008	-0.008	-0.0077	45	43.75	38.961	42.5703	3.18762
A+S 1:100	Experimental	Experimental	-0.0044	-0.0042	-0.0046	-0.0079	-0.0073	-0.0079	55.6962	57.5342	58.2278	57.1528	1.30823
A+S 100:1	Predicted	Predicted							34.5569	29.1511	32.0791	31.929	2.70598
A+S 10:1	Predicted	Predicted							36.5127	31.6017	33.8936	34.0027	2.45731
A+S 1:1	Predicted	Predicted							36.3323	33.6347	32.3037	34.0903	2.05258
A+S 1:10	Predicted	Predicted							36.3665	32.6255	35.0064	34.6661	1.89359
A+S 1:100	Predicted	Predicted							40.7772	36.2637	37.4459	38.1623	2.34045
1:10 Predicted	1:10 Experimental		Percent synergy	Avergare synergy	STD			Multiplicative Synergy	Average	STD
36.3665	45		8.63348	7.9042	3.64017			1.2374	1.23045	0.114163
32.6255	43.75		11.1245					1.34098
35.0064	38.961		3.9546					1.11297
1:100 Predicted	1:100 Experimental		Percent synergy	Avergare synergy	STD			Multiplicative Synergy	Average	STD
40.7772	55.6962		14.919	18.9905	3.53446			1.36587	1.50247	0.119348
36.2637	57.5342		21.2705					1.58655
37.4459	58.2278		20.782					1.55499

## Sheet: AtLEA4-2 Trehalose
Samples	Mixture	Type	E1	E2	E3	C1	C2	C3	EC1	EC2	EC3	Average	Stdev
Control	Control	Control	-0.0002	-9e-05	-8e-05	-0.008	-0.0078	-0.008	2.5	1.15385	1	1.55128	0.825207
AtLEA4-2	AtLEA4-2	AtLEA4-2	-0.0014	-0.0014	-0.0014	-0.0086	-0.0085	-0.0084	16.2791	16.4706	16.6667	16.4721	0.193803
A+T 100:1	Trehalose	Trehalose	-0.0001	-9e-05	-0.0002	-0.0074	-0.0077	-0.008	1.35135	1.16883	2.5	1.67339	0.721655
A+T 10:1	Trehalose	Trehalose	-0.0001	-0.0002	-4e-05	-0.0075	-0.0078	-0.0079	1.33333	2.5641	0.506329	1.46792	1.03547
A+T 1:1	Trehalose	Trehalose	-0.0002	-0.0001	-8e-05	-0.0074	-0.0082	-0.0078	2.7027	1.21951	1.02564	1.64929	0.917422
A+T 1:10	Trehalose	Trehalose	-0.0001	-0.0003	-0.0004	-0.008	-0.0083	-0.0078	1.25	3.61446	5.12821	3.33089	1.95459
A+T 1:100	Trehalose	Trehalose	-0.002	-0.0016	-0.0015	-0.0077	-0.0076	-0.0076	25.974	21.0526	19.7368	22.2545	3.2877
A+T 100:1	Experimental	Experimental	-0.0013	-0.0015	-0.0013	-0.0086	-0.0086	-0.0084	15.1163	17.4419	15.4762	16.0114	1.25178
A+T 10:1	Experimental	Experimental	-0.0018	-0.0016	-0.0016	-0.0085	-0.0085	-0.0084	21.1765	18.8235	19.0476	19.6825	1.29862
A+T 1:1	Experimental	Experimental	-0.0016	-0.0017	-0.0016	-0.0086	-0.0083	-0.0086	18.6047	20.4819	18.6047	19.2304	1.08385
A+T 1:10	Experimental	Experimental	-0.0021	-0.0017	-0.0016	-0.0085	-0.0085	-0.0085	24.7059	20	18.8235	21.1765	3.11265
A+T 1:100	Experimental	Experimental	-0.003	-0.0028	-0.0027	-0.0074	-0.0065	-0.0055	40.5405	43.0769	49.0909	44.2361	4.39147
A+T 100:1	Predicted	Predicted							17.6304	17.6394	19.1667	18.1455	0.884366
A+T 10:1	Predicted	Predicted							17.6124	19.0347	17.173	17.94	0.97313
A+T 1:1	Predicted	Predicted							18.9818	17.6901	17.6923	18.1214	0.745111
A+T 1:10	Predicted	Predicted							17.5291	20.085	21.7949	19.803	2.14684
A+T 1:100	Predicted	Predicted							42.2531	37.5232	36.4035	38.7266	3.10492
1:100 Predicted	1:100 Experimental		Percent synergy	Avergare synergy	STD			Multiplicative Synergy	Average	STD
42.2531	40.5405		-1.71256	5.50952	7.20008			0.959469	1.152	0.194557
37.5232	43.0769		5.5537					1.14801
36.4035	49.0909		12.6874					1.34852
1:1 Predicted	1:1 Experimental		Percent synergy	Avergare synergy	STD			Multiplicative Synergy	Average	STD
18.9818	18.6047		-0.377121	1.10902	1.5936			0.980132	1.06317	0.0894098
17.6901	20.4819		2.79183					1.15782
17.6923	18.6047		0.912343					1.05157

## Sheet: AtLEA4-2 Sucrose
Samples	Mixture	Type	E1	E2	E3	C1	C2	C3	EC1	EC2	EC3	Average	Stdev
Control	Control	Control	-0.0002	-9e-05	-8e-05	-0.008	-0.0078	-0.008	2.5	1.15385	1	1.55128	0.825207
AtLEA4-2	AtLEA4-2	AtLEA4-2	-0.0014	-0.0014	-0.0014	-0.0086	-0.0085	-0.0084	16.2791	16.4706	16.6667	16.4721	0.193803
A+S 100:1	Sucrose	Sucrose	-3e-05	-7e-05	-0.0001	-0.0078	-0.0076	-0.0074	0.384615	0.921053	1.35135	0.885673	0.484338
A+S 10:1	Sucrose	Sucrose	-0.0002	-5e-05	-7e-05	-0.0077	-0.0079	-0.0076	2.5974	0.632911	0.921053	1.38379	1.06085
A+S 1:1	Sucrose	Sucrose	-0.0002	-0.0001	-0.0002	-0.0076	-0.0079	-0.0081	2.63158	1.26582	2.46914	2.12218	0.746061
A+S 1:10	Sucrose	Sucrose	-0.0003	-0.0001	-0.0003	-0.0075	-0.0079	-0.0077	4	1.26582	3.8961	3.05398	1.54946
A+S 1:100	Sucrose	Sucrose	-0.0009	-0.0008	-0.0008	-0.0075	-0.0068	-0.0076	12	11.7647	10.5263	11.4303	0.791698
A+S 100:1	Experimental	Experimental	-0.0014	-0.0013	-0.0013	-0.0087	-0.0085	-0.0085	16.092	15.2941	15.2941	15.5601	0.460631
A+S 10:1	Experimental	Experimental	-0.0019	-0.0013	-0.0017	-0.0085	-0.0085	-0.0085	22.3529	15.2941	20	19.2157	3.59418
A+S 1:1	Experimental	Experimental	-0.0017	-0.0017	-0.0018	-0.0084	-0.0086	-0.0085	20.2381	19.7674	21.1765	20.394	0.717336
A+S 1:10	Experimental	Experimental	-0.002	-0.0018	-0.002	-0.0065	-0.0065	-0.0065	30.7692	27.6923	30.7692	29.7436	1.77646
A+S 1:100	Experimental	Experimental	-0.0051	-0.0065	-0.0055	-0.0086	-0.0094	-0.0087	59.3023	69.1489	63.2184	63.8899	4.95753
A+S 100:1	Predicted	Predicted							16.6637	17.3916	18.018	17.3578	0.677801
A+S 10:1	Predicted	Predicted							18.8765	17.1035	17.5877	17.8559	0.916405
A+S 1:1	Predicted	Predicted							18.9106	17.7364	19.1358	18.5943	0.751424
A+S 1:10	Predicted	Predicted							20.2791	17.7364	20.5628	19.5261	1.55638
A+S 1:100	Predicted	Predicted							28.2791	28.2353	27.193	27.9024	0.614806
1:10 Predicted	1:10 Experimental		Percent synergy	Avergare synergy	STD			Multiplicative Synergy	Average	STD
20.2791	30.7692		10.4902	10.2175	0.267303			1.51729	1.52499	0.033162
17.7364	27.6923		9.9559					1.56133
20.5628	30.7692		10.2065					1.49636
1:100 Predicted	1:100 Experimental		Percent synergy	Avergare synergy	STD			Multiplicative Synergy	Average	STD
28.2791	59.3023		31.0233	35.9874	4.9453			2.09704	2.29029	0.178513
28.2353	69.1489		40.9136					2.44902
27.193	63.2184		36.0254					2.32481
1:1 Predicted	1:1 Experimental		Percent synergy	Avergare synergy	STD			Multiplicative Synergy	Average	STD
18.9106	20.2381		1.32745	1.79972	0.409025			1.0702	1.09712	0.0236437
17.7364	19.7674		2.03103					1.11451
19.1358	21.1765		2.04067					1.10664

## Sheet: HeLEA68614 Trehalose
Samples	Mixture	Type	E1	E2	E3	C1	C2	C3	EC1	EC2	EC3	Average	Stdev
Control	Control	Control	-0.0002	-0.0002	-0.0002	-0.0082	-0.0079	-0.0081	2.43902	2.53165	2.46914	2.47994	0.0472455
HeLEA68614	HeLEA68614	HeLEA68614	-0.0025	-0.0025	-0.0027	-0.0076	-0.0081	-0.008	32.8947	30.8642	33.75	32.503	1.48225
H+T 100:1	Trehalose	Trehalose	-0.0002	-0.0001	-0.0003	-0.0079	-0.0079	-0.0076	2.53165	1.26582	3.94737	2.58161	1.34147
H+T 10:1	Trehalose	Trehalose	-0.0002	-0.0002	-0.0002	-0.0081	-0.008	-0.0082	2.46914	2.5	2.43902	2.46939	0.0304886
H+T 1:1	Trehalose	Trehalose	-0.0004	-0.0001	-0.0002	-0.0081	-0.0082	-0.0082	4.93827	1.21951	2.43902	2.8656	1.89572
H+T 1:10	Trehalose	Trehalose	-0.0003	-0.0002	-0.0003	-0.0083	-0.0079	-0.0079	3.61446	2.53165	3.79747	3.31452	0.68414
H+T 1:100	Trehalose	Trehalose	-0.0006	-0.0011	-0.0007	-0.0082	-0.0083	-0.008	7.31707	13.253	8.75	9.77336	3.09747
H+T 100:1	Experimental	Experimental	-0.0023	-0.0024	-0.0029	-0.0084	-0.0085	-0.0083	27.381	28.2353	34.9398	30.1853	4.13955
H+T 10:1	Experimental	Experimental	-0.0027	-0.0025	-0.0028	-0.0088	-0.0084	-0.0084	30.6818	29.7619	33.3333	31.259	1.85436
H+T 1:1	Experimental	Experimental	-0.0031	-0.0029	-0.0029	-0.0085	-0.0086	-0.0084	36.4706	33.7209	34.5238	34.9051	1.41393
H+T 1:10	Experimental	Experimental	-0.0038	-0.0039	-0.0037	-0.0081	-0.0081	-0.0082	46.9136	48.1481	45.122	46.7279	1.52162
H+T 1:100	Experimental	Experimental	-0.005	-0.005	-0.005	-0.0082	-0.0084	-0.0087	60.9756	59.5238	57.4713	59.3236	1.76073
H+T 100:1	Predicted	Predicted							35.4264	32.13	37.6974	35.0846	2.79937
H+T 10:1	Predicted	Predicted							35.3639	33.3642	36.189	34.9724	1.45254
H+T 1:1	Predicted	Predicted							37.833	32.0837	36.189	35.3686	2.96116
H+T 1:10	Predicted	Predicted							36.5092	33.3958	37.5475	35.8175	2.16052
H+T 1:100	Predicted	Predicted							40.2118	44.1172	42.5	42.2763	1.96228
1:10 Predicted	1:10 Experimental		Percent synergy	Avergare synergy	STD			Multiplicative Synergy	Average	STD
36.5092	46.9136		10.4044	10.9104	3.61557			1.28498	1.30948	0.121867
33.3958	48.1481		14.7523					1.44174
37.5475	45.122		7.57448					1.20173
1:100 Predicted	1:100 Experimental		Percent synergy	Avergare synergy	STD			Multiplicative Synergy	Average	STD
40.2118	60.9756		20.7638	17.0472	3.226			1.51636	1.40595	0.0956319
44.1172	59.5238		15.4066					1.34922
42.5	57.4713		14.9713					1.35227

## Sheet: HeLEA68614 Sucrose
Samples	Mixture	Type	E1	E2	E3	C1	C2	C3	EC1	EC2	EC3	Average	Stdev
Control	Control	Control	-0.0002	-0.0002	-0.0002	-0.0082	-0.0079	-0.0081	2.43902	2.53165	2.46914	2.47994	0.0472455
HeLEA68614	HeLEA68614	HeLEA68614	-0.0025	-0.0025	-0.0027	-0.0076	-0.0081	-0.008	32.8947	30.8642	33.75	32.503	1.48225
H+S 100:1	Sucrose	Sucrose	-2e-05	-0.0002	-0.0001	-0.0079	-0.0076	-0.0084	0.253165	2.63158	1.19048	1.35841	1.19807
H+S 10:1	Sucrose	Sucrose	-0.0002	-0.0001	-0.0003	-0.0087	-0.0081	-0.0081	2.29885	1.23457	3.7037	2.41237	1.23848
H+S 1:1	Sucrose	Sucrose	-0.0001	-0.0003	-0.0003	-0.008	-0.0081	-0.0079	1.25	3.7037	3.79747	2.91706	1.44448
H+S 1:10	Sucrose	Sucrose	-0.0002	-0.0003	-0.0003	-0.0079	-0.0082	-0.008	2.53165	3.65854	3.75	3.31339	0.678557
H+S 1:100	Sucrose	Sucrose	-0.0007	-0.0006	-0.0004	-0.0079	-0.008	-0.0077	8.86076	7.5	5.19481	7.18519	1.85314
H+S 100:1	Experimental	Experimental	-0.0023	-0.0023	-0.0027	-0.0085	-0.0086	-0.0086	27.0588	26.7442	31.3953	28.3995	2.59929
H+S 10:1	Experimental	Experimental	-0.0025	-0.0027	-0.0024	-0.0087	-0.0084	-0.0084	28.7356	32.1429	28.5714	29.8166	2.01624
H+S 1:1	Experimental	Experimental	-0.0028	-0.0027	-0.0029	-0.0076	-0.0082	-0.0082	36.8421	32.9268	35.3659	35.0449	1.97727
H+S 1:10	Experimental	Experimental	-0.0034	-0.0029	-0.0034	-0.0084	-0.0085	-0.0083	40.4762	34.1176	40.9639	38.5192	3.81967
H+S 1:100	Experimental	Experimental	-0.0038	-0.0038	-0.0034	-0.0084	-0.0085	-0.0084	45.2381	44.7059	40.4762	43.4734	2.60926
H+S 100:1	Predicted	Predicted							33.1479	33.4958	34.9405	33.8614	0.95057
H+S 10:1	Predicted	Predicted							35.1936	32.0988	37.4537	34.9154	2.68829
H+S 1:1	Predicted	Predicted							34.1447	34.5679	37.5475	35.42	1.85452
H+S 1:10	Predicted	Predicted							35.4264	34.5227	37.5	35.8164	1.52647
H+S 1:100	Predicted	Predicted							41.7555	38.3642	38.9448	39.6882	1.81374
1:10 Predicted	1:10 Experimental		Percent synergy	Avergare synergy	STD			Multiplicative Synergy	Average	STD
35.4264	40.4762		5.04981	2.70286	2.80594			1.14254	1.07439	0.0786941
34.5227	34.1176		-0.405087					0.988266
37.5	40.9639		3.46386					1.09237
1:100 Predicted	1:100 Experimental		Percent synergy	Avergare synergy	STD			Multiplicative Synergy	Average	STD
41.7555	45.2381		3.4826	3.78522	2.41939			1.0834	1.09601	0.063929
38.3642	44.7059		6.34168					1.1653
38.9448	40.4762		1.53139					1.03932

## Sheet: AvLEA1C Trehalose
Samples	Mixture	Type	E1	E2	E3	C1	C2	C3	EC1	EC2	EC3	Average	Stdev
Control	Control	Control	-9e-05	-0.0001	-4e-05	-0.0082	-0.0079	-0.0079	1.09756	1.26582	0.506329	0.956571	0.398894
AvLEA1C	AvLEA1C	AvLEA1C	-0.004	-0.0035	-0.004	-0.0085	-0.0079	-0.0086	47.0588	44.3038	46.5116	45.9581	1.45854
A+T 100:1	Trehalose	Trehalose	-0.0003	-0.0002	-0.0001	-0.0073	-0.008	-0.0077	4.10959	2.5	1.2987	2.6361	1.41038
A+T 10:1	Trehalose	Trehalose	-0.0003	-0.0001	-0.0001	-0.0073	-0.0081	-0.0073	4.10959	1.23457	1.36986	2.23801	1.62225
A+T 1:1	Trehalose	Trehalose	-0.0002	-0.0002	-0.0002	-0.0079	-0.0084	-0.0076	2.53165	2.38095	2.63158	2.51473	0.126167
A+T 1:10	Trehalose	Trehalose	-0.0003	-0.0002	-0.0003	-0.0079	-0.0076	-0.0082	3.79747	2.63158	3.65854	3.36253	0.636821
A+T 1:100	Trehalose	Trehalose	-0.0004	-0.0006	-0.0007	-0.0076	-0.008	-0.0075	5.26316	7.5	9.33333	7.3655	2.03842
A+T 100:1	Experimental	Experimental	-0.0044	-0.0044	-0.004	-0.0076	-0.0085	-0.0086	57.8947	51.7647	46.5116	52.057	5.69718
A+T 10:1	Experimental	Experimental	-0.0054	-0.004	-0.0043	-0.0084	-0.0082	-0.0083	64.2857	48.7805	51.8072	54.9578	8.21874
A+T 1:1	Experimental	Experimental	-0.0044	-0.0042	-0.004	-0.0083	-0.0083	-0.0086	53.012	50.6024	46.5116	50.042	3.28624
A+T 1:10	Experimental	Experimental	-0.0049	-0.004	-0.0041	-0.0084	-0.0082	-0.0083	58.3333	48.7805	49.3976	52.1705	5.34611
A+T 1:100	Experimental	Experimental	-0.0045	-0.005	-0.0045	-0.0083	-0.0083	-0.0085	54.2169	60.241	52.9412	55.7997	3.8988
A+T 100:1	Predicted	Predicted							51.1684	46.8038	47.8103	48.5942	2.28545
A+T 10:1	Predicted	Predicted							51.1684	45.5384	47.8815	48.1961	2.82818
A+T 1:1	Predicted	Predicted							49.5905	46.6847	49.1432	48.4728	1.56457
A+T 1:10	Predicted	Predicted							50.8563	46.9354	50.1702	49.3206	2.09397
A+T 1:100	Predicted	Predicted							52.322	51.8038	55.845	53.3236	2.1989
1:100 Predicted	1:100 Experimental		Percent synergy	Avergare synergy	STD			Multiplicative Synergy	Average	STD
52.322	54.2169		1.89489	2.47609	5.69277			1.03622	1.04903	0.108004
51.8038	60.241		8.43717					1.16287
55.845	52.9412		-2.90378					0.948003

[truncated: 7 more sheets: AvLEA1C Sucrose, AavLEA1 Trehalose, AavLEA1 Sucrose, BSA Trehalose, BSA Sucrose, CAHS D Trehalose, CAHS D Sucrose]
