# Supplementary material for: Disordered proteins interact with the chemical environment to tune their protective function during drying
Source: eLife. 2024 Nov 19;13:RP97231. doi: 10.7554/eLife.97231 (PMC11575898; doi:10.7554/eLife.97231)
Supplement: Figure 3—figure supplement 1—source data 1. [file elife-97231-fig3-figsupp1-data1.xlsx]

## Sheet: fig supp1A-B
Protein	Condition	Solvent	Ratio	Error
AtLEA3-3	Dehydrated	Buffer	0.863408	0.0165512
AtLEA4-2	Dehydrated	Buffer	0.967092	0.0204431
AvLEA1C	Dehydrated	Buffer	1.26032	0.187255
AavLEA1	Dehydrated	Buffer	0.997232	0.0237466
HeLEA68614	Dehydrated	Buffer	0.889071	0.0121829
CAHS_D	Dehydrated	Buffer	1.089	0.0787912
BSA	Dehydrated	Buffer	0.933876	0.0282248
AtLEA3-3	Dehydrated	Trehalose	0.979942	0.0620857
AtLEA4-2	Dehydrated	Trehalose	1.00318	0.040459
AvLEA1C	Dehydrated	Trehalose	1.78541	0.3284
AavLEA1	Dehydrated	Trehalose	0.988567	0.0403143
HeLEA68614	Dehydrated	Trehalose	1.08972	0.217626
CAHS_D	Dehydrated	Trehalose	1.12931	0.103344
BSA	Dehydrated	Trehalose	0.937492	0.0205013
AtLEA3-3	Dehydrated	Sucrose	1.02495	0.22561
AtLEA4-2	Dehydrated	Sucrose	1.17725	0.0948667
AvLEA1C	Dehydrated	Sucrose	1.46805	0.188562
AavLEA1	Dehydrated	Sucrose	1.0213	0.0696014
HeLEA68614	Dehydrated	Sucrose	1.06167	0.192781
CAHS_D	Dehydrated	Sucrose	1.05492	0.0684341
BSA	Dehydrated	Sucrose	0.941593	0.028978
AtLEA3-3	Hydrated	Buffer	0.585678	0.029773
AtLEA4-2	Hydrated	Buffer	0.576292	0.0198861
AvLEA1C	Hydrated	Buffer	0.579921	0.0425317
AavLEA1	Hydrated	Buffer	0.545569	0.0639549
HeLEA68614	Hydrated	Buffer	0.583705	0.0911039
CAHS_D	Hydrated	Buffer	0.805488	0.00643297
BSA	Hydrated	Buffer	0.926677	0.0104106
AtLEA3-3	Hydrated	Trehalose	0.587619	0.0311092
AtLEA4-2	Hydrated	Trehalose	0.601231	0.00505395
AvLEA1C	Hydrated	Trehalose	0.627692	0.0413456
AavLEA1	Hydrated	Trehalose	0.580524	0.0199016
HeLEA68614	Hydrated	Trehalose	0.568227	0.0465293
CAHS_D	Hydrated	Trehalose	0.829147	0.0203403
BSA	Hydrated	Trehalose	0.925853	0.0051611
AtLEA3-3	Hydrated	Sucrose	0.532423	0.0377945
AtLEA4-2	Hydrated	Sucrose	0.616511	0.00992579
AvLEA1C	Hydrated	Sucrose	0.631108	0.0204485
AavLEA1	Hydrated	Sucrose	0.535362	0.0428555
HeLEA68614	Hydrated	Sucrose	0.569978	0.0728203
CAHS_D	Hydrated	Sucrose	0.816299	0.013846
BSA	Hydrated	Sucrose	0.93269	0.00428466

## Sheet: fig supp1C
Protein	% Synergy with Trehalose	% Synergy with Trehalose_err	d222/d210	d222/d210	d222/d210
AtLEA3-3	15.0336	4.60272	0.0204288	-0.0183306	0.00372556
AavLEA1	21.0321	3.39775	0.0412854	-0.0136272	0.0772043
HeLEA68614	17.0472	3.226	0.0374654	-0.0590505	-0.024847
AvLEA1C	2.47609	5.69277	0.0370527	0.0677519	0.0385075
AtLEA4-2	5.50952	7.20008	0.0321416	0.0364451	0.00343958
CAHS D	47.5866	5.04086	0.0524369	-0.0004195	0.01896
BSA	5.06457	9.2801	-0.0061401	0.00451335	-0.0008446

## Sheet: fig supp1D
Protein	% Synergy with trehalose	% Synergy with trehalose_err	d222/d210	d222/d210	d222/d210
AtLEA3-3	15.0336	4.60272	0.192341	0.0655647	0.0916958
AavLEA1	21.0321	3.39775	-0.0579634	0.00233602	0.0296319
HeLEA68614	17.0472	3.226	0.432015	0.180271	-0.0103343
AvLEA1C	2.47609	5.69277	0.593318	0.294162	0.687813
AtLEA4-2	5.50952	7.20008	-0.0312268	0.0670849	0.0724127
CAHS D	47.5866	5.04086	0.178881	-0.121186	-0.0395645
BSA	5.06457	9.2801	0.0349069	0.0188823	-0.042939

## Sheet: fig supp1E
Protein	% Synergy with Sucrose	% Synergy with Sucrose_err	d222/d210	d222/d210	d222/d210
AtLEA3-3	18.9905	3.53446	-0.0678214	-0.0403038	-0.0516407
AavLEA1	11.366	3.31953	-0.0069019	-0.0330569	0.00933565
HeLEA68614	3.78522	2.41939	0.00932923	-0.0145103	-0.0360008
AvLEA1C	3.79829	2.61934	0.061463	0.0839341	0.00816295
AtLEA4-2	35.9874	4.9453	0.047431	0.0444557	0.0287705
CAHS D	28.6026	0.345064	0.0266404	0.0113806	-0.0055889
BSA	1.80229	8.32151	-0.0085177	0.0192592	0.00729841

## Sheet: fig supp1F
Protein	% Synergy with Sucrose	% Synergy with Sucrose_err	d222/d210	d222/d210	d222/d210
AtLEA3-3	18.9905	3.53446	0.0869449	0.42544	-0.0277545
AavLEA1	11.366	3.31953	0.0277972	-0.0274915	0.0719068
HeLEA68614	3.78522	2.41939	0.40553	0.050396	0.0618695
AvLEA1C	3.79829	2.61934	0.281049	0.120813	0.221336
AtLEA4-2	35.9874	4.9453	0.297382	0.14386	0.189246
CAHS D	28.6026	0.345064	-0.0164615	-0.153178	0.0673876
BSA	1.80229	8.32151	0.0440567	0.00154403	-0.0224481
