# Supplementary material for: Disordered proteins interact with the chemical environment to tune their protective function during drying
Source: eLife. 2024 Nov 19;13:RP97231. doi: 10.7554/eLife.97231 (PMC11575898; doi:10.7554/eLife.97231)
Supplement: Figure 3—source data 1. [file elife-97231-fig3-data1.xlsx]

## Sheet: 3A-B
pepConc (uM)	100	100	100	100	100	100	100	100	100	100	100	100	100	100	100	100	100	100	100	100	100	100	100	100	100	100	100	100	100	100	100	100	100	100	100	100	100	100	100	100	100	100	100	100	100	100	100	100	100
pep	AtLEA4-2	AtLEA4-2	AtLEA4-2	AtLEA4-2	AtLEA4-2	AtLEA4-2	AtLEA4-2	AtLEA4-2	AtLEA4-2	AtLEA4-2	AtLEA4-2	AtLEA4-2	AtLEA4-2	AtLEA4-2	AtLEA4-2	AtLEA4-2	AtLEA4-2	AtLEA4-2	AtLEA4-2	AtLEA4-2	AtLEA4-2	AtLEA4-2	AtLEA4-2	AtLEA4-2	AtLEA4-2	AtLEA4-2	AtLEA4-2	AtLEA4-2	AtLEA4-2	AtLEA4-2	AtLEA4-2	AtLEA4-2	AtLEA4-2	HeLEA68614	HeLEA68614	HeLEA68614	HeLEA68614	HeLEA68614	HeLEA68614	HeLEA68614	HeLEA68614	HeLEA68614	HeLEA68614	HeLEA68614	HeLEA68614	HeLEA68614	HeLEA68614	HeLEA68614	HeLEA68614
solConc (mM)	0	0	0	0	0	0	0	0	0	10	10	10	10	10	10	10	10	10	10	10	10	10	10	10	10	10	10	0.1	0.1	0.1	0.1	0.1	0.1	0	0	0	0	0	0	0	0	0	10	10	10	10	10	10	10
sol	None	None	None	None	None	None	None	None	None	Trehalose	Trehalose	Trehalose	Trehalose	Trehalose	Trehalose	Trehalose	Trehalose	Trehalose	Sucrose	Sucrose	Sucrose	Sucrose	Sucrose	Sucrose	Sucrose	Sucrose	Sucrose	Trehalose	Trehalose	Trehalose	Sucrose	Sucrose	Sucrose	None	None	None	None	None	None	None	None	None	Trehalose	Trehalose	Trehalose	Trehalose	Trehalose	Trehalose	Trehalose
time	0min	0min	0min	60min	60min	60min	60min	60min	60min	0min	0min	0min	60min	60min	60min	60min	60min	60min	0min	0min	0min	60min	60min	60min	60min	60min	60min	0min	60min	60min	0min	60min	60min	0min	0min	0min	60min	60min	60min	60min	60min	60min	0min	0min	0min	60min	60min	60min	60min
state	Aqueous	Aqueous	Aqueous	Desiccated	Desiccated	Desiccated	Rehydrated	Rehydrated	Rehydrated	Aqueous	Aqueous	Aqueous	Desiccated	Desiccated	Desiccated	Rehydrated	Rehydrated	Rehydrated	Aqueous	Aqueous	Aqueous	Desiccated	Desiccated	Desiccated	Rehydrated	Rehydrated	Rehydrated	Aqueous	Desiccated	Rehydrated	Aqueous	Desiccated	Rehydrated	Aqueous	Aqueous	Aqueous	Desiccated	Desiccated	Desiccated	Rehydrated	Rehydrated	Rehydrated	Aqueous	Aqueous	Aqueous	Desiccated	Desiccated	Desiccated	Rehydrated
cuvette	0.05	0.05	0.05	0.05	0.05	0.05	0.05	0.05	0.05	0.05	0.05	0.05	0.05	0.05	0.05	0.05	0.05	0.05	0.05	0.05	0.05	0.05	0.05	0.05	0.05	0.05	0.05	0.05	0.05	0.05	0.05	0.05	0.05	0.05	0.05	0.05	0.05	0.05	0.05	0.05	0.05	0.05	0.05	0.05	0.05	0.05	0.05	0.05	0.05
repeat	1	2	3	1	2	3	1	2	3	1	2	3	1	2	3	1	2	3	1	2	3	1	2	3	1	2	3	1	1	1	1	1	1	1	2	3	1	2	3	1	2	3	1	2	3	1	2	3	1
260	-0.203232	-0.125602	0.308347	-0.343295	-0.332043	-0.384522	-0.194041	-0.254569	0.0412202	-0.163106	-0.176407	-0.163969	-0.3752	-0.318418	-0.465388	-0.239689	-0.0717343	-0.25559	-0.0556078	-0.0451491	-0.117169	-0.677288	-0.602794	-0.266749	-0.202623	-0.379015	-0.189319	-0.2609	-0.0130734	-0.0755108	-0.202683	-0.300248	-0.0607683	-0.226187	0.240907	-0.188012	-0.391436	0.00966882	-0.129438	-0.274051	-0.156767	-0.189081	-0.29988	0.0596618	-0.166262	-0.316441	-0.464909	-0.187297	0.0433725
259.9	-0.220458	-0.131162	0.308542	-0.344302	-0.399683	-0.385548	-0.212766	-0.224651	0.0463553	-0.148645	-0.205241	-0.145021	-0.354481	-0.337656	-0.434038	-0.262965	-0.0830691	-0.250178	-0.0549721	-0.0786066	-0.0944977	-0.664657	-0.605263	-0.235408	-0.174348	-0.390806	-0.18901	-0.264735	-0.0040184	-0.10085	-0.201881	-0.335547	-0.0802428	-0.292057	0.23598	-0.188118	-0.390189	-0.0143791	-0.13457	-0.287802	-0.114734	-0.172837	-0.295122	0.0799264	-0.180869	-0.361446	-0.437439	-0.181217	0.0308386
259.8	-0.210439	-0.116627	0.297753	-0.31928	-0.348717	-0.402931	-0.178418	-0.176228	0.059794	-0.126901	-0.231446	-0.117212	-0.33825	-0.331038	-0.365323	-0.300213	-0.10687	-0.224078	-0.0633845	-0.0699657	-0.08789	-0.718275	-0.581423	-0.25758	-0.213143	-0.413449	-0.212778	-0.22477	-0.0266685	-0.138308	-0.180429	-0.284487	-0.0781692	-0.281878	0.222314	-0.231663	-0.43187	-0.082607	-0.139514	-0.279014	-0.0507082	-0.160391	-0.296956	0.103971	-0.143698	-0.361637	-0.454448	-0.150257	0.0118341
259.7	-0.103432	-0.113937	0.316047	-0.314074	-0.31498	-0.40103	-0.210008	-0.185405	0.0340205	-0.123722	-0.298463	-0.144573	-0.375805	-0.325141	-0.343386	-0.260192	-0.116056	-0.280048	-0.0798199	-0.0820801	-0.133427	-0.683943	-0.561246	-0.301802	-0.214777	-0.41824	-0.226609	-0.217563	0.010544	-0.139773	-0.186465	-0.287621	-0.0530907	-0.275303	0.211253	-0.234246	-0.441432	-0.0642148	-0.132823	-0.273928	-0.0710778	-0.135041	-0.308454	0.0289817	-0.116922	-0.363763	-0.427122	-0.182108	0.0122804
259.6	-0.105682	-0.105717	0.338176	-0.282681	-0.350598	-0.350428	-0.202566	-0.173217	0.0393496	-0.117022	-0.291215	-0.145116	-0.363341	-0.301393	-0.334736	-0.232497	-0.0717541	-0.29985	-0.128686	-0.111546	-0.160987	-0.654589	-0.612784	-0.319486	-0.240073	-0.370366	-0.287486	-0.233391	0.0264983	-0.109186	-0.207886	-0.259162	-0.0251802	-0.317479	0.188855	-0.227831	-0.417285	-0.0930211	-0.0727953	-0.289627	-0.116442	-0.12243	-0.306158	-0.0168706	-0.0870472	-0.387172	-0.439407	-0.21336	-0.0083262
259.5	-0.129625	-0.0642371	0.308986	-0.291103	-0.31635	-0.299872	-0.20305	-0.189025	0.00715762	-0.129537	-0.290885	-0.131918	-0.428448	-0.260018	-0.336833	-0.225306	-0.0576577	-0.346381	-0.137463	-0.0955715	-0.173695	-0.651111	-0.626248	-0.314646	-0.196769	-0.355813	-0.253908	-0.236711	0.0808523	-0.0994945	-0.234149	-0.283374	0.0298141	-0.322158	0.156223	-0.261177	-0.370518	-0.117252	-0.110024	-0.300369	-0.0691694	-0.123474	-0.263584	-0.0717201	-0.166539	-0.414011	-0.398449	-0.212781	-0.0035678
259.4	-0.161711	-0.119895	0.285479	-0.280354	-0.355505	-0.306942	-0.198581	-0.243001	0.0692431	-0.18241	-0.274383	-0.121346	-0.451638	-0.324977	-0.315347	-0.25596	-0.059171	-0.347096	-0.0767436	-0.114958	-0.208033	-0.734848	-0.647753	-0.269942	-0.120452	-0.33487	-0.265327	-0.215338	0.0339127	-0.0468926	-0.221237	-0.282245	0.0135029	-0.287799	0.118545	-0.169647	-0.339511	-0.0624442	-0.113604	-0.305664	-0.0589468	-0.170079	-0.266763	-0.0805445	-0.237038	-0.454011	-0.392832	-0.208177	-0.028799
259.3	-0.135074	-0.136979	0.264368	-0.262778	-0.373554	-0.324042	-0.21441	-0.258726	0.0363438	-0.215456	-0.242722	-0.115775	-0.467656	-0.353065	-0.314929	-0.285964	-0.0927946	-0.320586	-0.0897894	-0.129508	-0.184406	-0.707634	-0.612607	-0.28479	-0.102642	-0.355181	-0.304255	-0.196221	0.0164836	-0.0757464	-0.227654	-0.261257	0.00070495	-0.349998	0.106358	-0.145016	-0.345646	-0.0583377	-0.0993549	-0.319927	-0.0283717	-0.202378	-0.224779	-0.0468146	-0.262276	-0.457186	-0.442078	-0.186333	-0.0334216
259.2	-0.158784	-0.162325	0.271721	-0.266084	-0.342799	-0.3257	-0.226553	-0.234322	0.0442773	-0.176029	-0.252627	-0.131451	-0.485212	-0.341647	-0.344643	-0.319954	-0.0732221	-0.354474	-0.11149	-0.073315	-0.176719	-0.733757	-0.563523	-0.273226	-0.0703965	-0.355668	-0.302524	-0.159281	0.052667	-0.0836764	-0.208713	-0.205043	-0.0019996	-0.314864	0.157654	-0.138832	-0.321594	-0.0352831	-0.127368	-0.326759	-0.0138626	-0.234023	-0.16402	-0.0713796	-0.269014	-0.494879	-0.481771	-0.209555	-0.0469198
259.1	-0.150787	-0.167346	0.270056	-0.266972	-0.316396	-0.303052	-0.264523	-0.190125	-0.0032068	-0.200486	-0.252426	-0.188652	-0.430591	-0.343727	-0.342086	-0.355493	-0.0635354	-0.334207	-0.104244	-0.105012	-0.178932	-0.725546	-0.516662	-0.348484	-0.065809	-0.362484	-0.314103	-0.157081	0.0588145	-0.0621934	-0.271229	-0.241932	-0.0007622	-0.295298	0.123821	-0.146617	-0.307908	-0.0049055	-0.131725	-0.349696	-0.0303198	-0.283647	-0.137705	-0.125605	-0.244989	-0.582525	-0.479223	-0.223247	-0.0630698
259	-0.16373	-0.145143	0.248831	-0.223869	-0.327846	-0.260863	-0.256202	-0.207931	-0.0222063	-0.194625	-0.26848	-0.19413	-0.380423	-0.30656	-0.368674	-0.325395	-0.0582968	-0.327997	-0.114509	-0.0580129	-0.160271	-0.703498	-0.531781	-0.340171	-0.0366526	-0.296037	-0.353158	-0.145198	0.0621038	-0.0721759	-0.24157	-0.285848	-0.0061582	-0.237841	0.14759	-0.124634	-0.302866	-0.0294148	-0.131478	-0.364709	-0.0266114	-0.264084	-0.177168	-0.0475217	-0.244062	-0.608827	-0.483086	-0.220792	-0.0397575
258.9	-0.180053	-0.147926	0.2264	-0.23843	-0.311551	-0.271456	-0.261254	-0.187043	-0.0368991	-0.202328	-0.248005	-0.122514	-0.359574	-0.340351	-0.424935	-0.274776	-0.0576468	-0.322943	-0.0827164	-0.0466549	-0.131675	-0.687379	-0.535906	-0.344214	-0.0114023	-0.339044	-0.340135	-0.167988	0.0815181	-0.0893014	-0.212674	-0.249717	0.0022114	-0.245299	0.135651	-0.176034	-0.259453	-0.0608846	-0.143446	-0.341766	-0.014068	-0.217846	-0.159711	-0.0894683	-0.205519	-0.621537	-0.42844	-0.221656	-0.0504586
258.8	-0.151496	-0.146494	0.215878	-0.233466	-0.32916	-0.258012	-0.273124	-0.183379	-0.0536628	-0.147656	-0.193828	-0.113339	-0.400498	-0.362013	-0.419122	-0.266132	-0.041939	-0.314109	-0.14315	-0.0515949	-0.0969602	-0.731892	-0.548402	-0.291979	-0.0071458	-0.382096	-0.32322	-0.132192	0.0646607	-0.0823611	-0.237298	-0.256608	-0.0472147	-0.24263	0.134785	-0.167161	-0.251521	-0.0943888	-0.16758	-0.349602	-0.0408269	-0.207008	-0.176804	-0.0943671	-0.181226	-0.635275	-0.415856	-0.220829	-0.0288064
258.7	-0.169061	-0.108032	0.232407	-0.204082	-0.310098	-0.243385	-0.258156	-0.179592	0.0251487	-0.113239	-0.128568	-0.13619	-0.397212	-0.341766	-0.391017	-0.269215	-0.0123499	-0.26148	-0.16189	-0.0136099	-0.0934887	-0.796183	-0.590818	-0.31604	0.0115548	-0.368779	-0.33199	-0.155596	0.0688827	-0.088794	-0.254884	-0.260517	-0.0434367	-0.253559	0.113366	-0.233057	-0.265179	-0.071108	-0.137642	-0.380279	-0.0852872	-0.230416	-0.133018	-0.145078	-0.200043	-0.636774	-0.436992	-0.206325	-0.0325253
258.6	-0.169999	-0.0729623	0.193373	-0.218929	-0.298875	-0.274371	-0.237863	-0.134102	-0.0447273	-0.103247	-0.134802	-0.0994485	-0.398628	-0.354239	-0.396703	-0.238118	0.0356043	-0.260618	-0.17225	-0.0764926	-0.131686	-0.841346	-0.513158	-0.37607	-0.0581293	-0.325064	-0.307011	-0.138202	0.117339	-0.0946313	-0.257077	-0.288274	-0.0763576	-0.207484	0.0937118	-0.20072	-0.296877	-0.0917137	-0.242995	-0.42387	-0.0769873	-0.23895	-0.146271	-0.17536	-0.194719	-0.679343	-0.46967	-0.241266	-0.0250428
258.5	-0.163756	-0.0774504	0.182303	-0.232229	-0.327672	-0.256484	-0.278195	-0.0865881	-0.0138043	-0.0628884	-0.108424	-0.0791201	-0.389356	-0.405342	-0.420337	-0.221855	0.026762	-0.238007	-0.176598	-0.0588715	-0.144517	-0.867465	-0.500011	-0.410425	-0.0596131	-0.274659	-0.285648	-0.167361	0.0856561	-0.101999	-0.232585	-0.284575	-0.0539712	-0.212697	0.0856821	-0.208584	-0.257485	-0.143079	-0.216421	-0.367081	-0.0011053	-0.260697	-0.0843111	-0.160285	-0.203916	-0.728154	-0.467556	-0.206498	-0.0626026
258.4	-0.136788	-0.0032993	0.176277	-0.232343	-0.284586	-0.250053	-0.232661	-0.0814554	-0.0400913	-0.107106	-0.0759839	-0.122169	-0.345691	-0.439785	-0.434912	-0.272402	0.0101113	-0.269319	-0.162198	-0.067971	-0.0987024	-0.900302	-0.494652	-0.452679	-0.105831	-0.288309	-0.251903	-0.150106	0.0898312	-0.134169	-0.185267	-0.310604	-0.078277	-0.188926	0.0304644	-0.213456	-0.230417	-0.180178	-0.205805	-0.328931	-0.0379034	-0.269256	-0.063088	-0.162454	-0.191195	-0.756666	-0.470023	-0.242869	-0.018726
258.3	-0.155465	-0.0714244	0.18358	-0.183067	-0.244319	-0.241925	-0.237459	-0.0779596	-0.0424834	-0.121663	-0.0661901	-0.145096	-0.372092	-0.463389	-0.48311	-0.250804	-0.0333296	-0.250031	-0.18707	-0.11768	-0.095632	-0.908594	-0.500331	-0.478947	-0.102406	-0.260297	-0.249593	-0.126099	0.0930695	-0.0943599	-0.223911	-0.281075	-0.062198	-0.152033	0.0356533	-0.229579	-0.279192	-0.10223	-0.2047	-0.308814	-0.0322704	-0.247996	-0.0408773	-0.179662	-0.206463	-0.716741	-0.406507	-0.23776	-0.0040028
258.2	-0.11567	-0.0549423	0.126187	-0.12017	-0.28447	-0.280852	-0.25473	-0.059851	-0.0709471	-0.117062	-0.060101	-0.164119	-0.305446	-0.478205	-0.421165	-0.250701	0.0207754	-0.257593	-0.239662	-0.0861869	-0.0665606	-0.897366	-0.489173	-0.476884	-0.0758982	-0.24541	-0.277275	-0.139661	0.0326412	-0.110167	-0.262214	-0.315034	-0.0321011	-0.214774	0.0354269	-0.258628	-0.259538	-0.161478	-0.169649	-0.291257	-0.0524591	-0.289312	-0.0596224	-0.187491	-0.210003	-0.675095	-0.444397	-0.269304	-0.0029649
258.1	-0.130167	-0.0517462	0.12588	-0.10297	-0.252971	-0.244512	-0.221662	-0.0306288	-0.0940166	-0.123846	-0.0427929	-0.196302	-0.279833	-0.464678	-0.438714	-0.271933	0.00805711	-0.295096	-0.267392	-0.0843972	-0.0453296	-0.868423	-0.510136	-0.475399	-0.0766919	-0.223273	-0.291976	-0.139083	-0.0663166	-0.0862646	-0.281774	-0.333014	-0.0276157	-0.218461	0.0365294	-0.292729	-0.235506	-0.163994	-0.202265	-0.307398	-0.0381389	-0.246055	-0.0949088	-0.170257	-0.245881	-0.679935	-0.478309	-0.289122	-0.0166229
258	-0.164439	-0.0509689	0.0850892	-0.116001	-0.290679	-0.22757	-0.22552	0.0041293	-0.167076	-0.138093	-0.009673	-0.21597	-0.294323	-0.434456	-0.40468	-0.24067	0.00434128	-0.259287	-0.275409	-0.0475912	-0.0984855	-0.901879	-0.461074	-0.524324	-0.0947036	-0.227405	-0.261528	-0.105434	-0.0910681	-0.0943084	-0.308481	-0.325008	-0.0165148	-0.199034	0.0457097	-0.335889	-0.28007	-0.134174	-0.221977	-0.271556	0.0481154	-0.231829	-0.102538	-0.150283	-0.23168	-0.669127	-0.444447	-0.289094	-0.0365169
257.9	-0.17348	-0.0356977	0.0557291	-0.0837972	-0.27018	-0.268325	-0.161338	0.00694984	-0.216221	-0.139654	-0.0123051	-0.226213	-0.266905	-0.460812	-0.448954	-0.266344	0.0185942	-0.23181	-0.29515	-0.0775626	-0.138978	-0.889241	-0.470308	-0.554578	-0.078152	-0.239767	-0.290374	-0.0859164	-0.0294834	-0.0737358	-0.287731	-0.311747	-0.016729	-0.217926	0.0743125	-0.321629	-0.247881	-0.0707108	-0.256718	-0.268601	0.0659421	-0.256066	-0.116286	-0.159235	-0.161426	-0.741538	-0.401026	-0.308921	-0.0344014
257.8	-0.103378	-0.0350212	0.0670387	-0.0564691	-0.256631	-0.264457	-0.169578	0.00838072	-0.235189	-0.136463	0.0240995	-0.214133	-0.256853	-0.463404	-0.463021	-0.247663	-0.064931	-0.227149	-0.33617	-0.109266	-0.105584	-0.902603	-0.491882	-0.574982	-0.0445462	-0.234129	-0.305672	-0.0794356	-0.0394481	-0.092856	-0.283699	-0.304026	0.0538486	-0.274789	0.0603234	-0.291185	-0.2278	-0.0585853	-0.254537	-0.307319	0.015922	-0.234591	-0.102732	-0.0972968	-0.165729	-0.778519	-0.352383	-0.311032	-0.0698894
257.7	-0.121165	-0.0526776	0.071471	-0.0487462	-0.280901	-0.307926	-0.154667	0.0209746	-0.294097	-0.126991	0.0296196	-0.193801	-0.295855	-0.505017	-0.471296	-0.214247	-0.0522793	-0.231328	-0.330164	-0.112409	-0.129359	-0.870609	-0.449705	-0.601425	-0.0371322	-0.244118	-0.279307	-0.0426218	0.0048811	-0.111006	-0.263913	-0.337098	0.0832374	-0.244246	0.0764626	-0.279081	-0.226682	-0.11233	-0.287011	-0.294326	0.0221727	-0.207946	-0.130554	-0.166066	-0.190138	-0.700812	-0.370832	-0.27245	-0.0648296
257.6	-0.135888	-0.0414933	0.0675104	-0.0460839	-0.253196	-0.318317	-0.146087	0.0278248	-0.285215	-0.100124	0.052059	-0.205761	-0.293262	-0.512959	-0.443559	-0.206615	-0.0783958	-0.255803	-0.367189	-0.114067	-0.114403	-0.909346	-0.447085	-0.558255	-0.0612843	-0.213456	-0.26649	-0.0242352	-0.0313456	-0.104786	-0.284153	-0.329946	0.0391925	-0.31346	0.0697957	-0.268071	-0.256395	-0.129215	-0.282401	-0.322845	0.0385909	-0.188464	-0.120105	-0.127183	-0.189097	-0.691389	-0.345565	-0.283408	-0.114192
257.5	-0.0995958	-0.0120242	0.10247	-0.005982	-0.280333	-0.35715	-0.117236	0.00426275	-0.296127	-0.0632612	0.0965432	-0.176741	-0.24997	-0.518268	-0.474266	-0.194204	-0.0728527	-0.239484	-0.361437	-0.100056	-0.0963925	-0.903829	-0.415552	-0.604609	-0.0756409	-0.226197	-0.249786	-0.0205014	-0.0627014	-0.0844721	-0.308617	-0.36202	-0.0119765	-0.308989	0.0666508	-0.212126	-0.203322	-0.200742	-0.279001	-0.345344	0.0205643	-0.164208	-0.136792	-0.107036	-0.175905	-0.694795	-0.322835	-0.300978	-0.142446
257.4	-0.0726351	-0.0438833	0.0632194	-0.0281997	-0.247161	-0.309108	-0.0990038	0.00717933	-0.30046	-0.0637131	0.069111	-0.133749	-0.28784	-0.539882	-0.423065	-0.187822	-0.0783438	-0.231377	-0.397281	-0.0976481	-0.124294	-0.8622	-0.407982	-0.548654	-0.0877569	-0.174407	-0.232505	-0.0295575	-0.0724876	-0.12536	-0.318426	-0.362378	-0.0077542	-0.341475	0.0527563	-0.191603	-0.248968	-0.166585	-0.276516	-0.373536	0.0242629	-0.131189	-0.150749	-0.0745912	-0.189242	-0.669357	-0.348867	-0.24677	-0.100114
257.3	-0.0301476	0.00210966	0.0587653	-0.0285627	-0.245645	-0.231589	-0.0453104	-0.0162353	-0.34634	-0.0688815	0.0725723	-0.133887	-0.285338	-0.540632	-0.404705	-0.186474	-0.095709	-0.236622	-0.39588	-0.120672	-0.112153	-0.886976	-0.412368	-0.527082	-0.103758	-0.157104	-0.206957	-0.0030285	-0.0327897	-0.131967	-0.308043	-0.377317	-0.0320607	-0.322096	0.0370658	-0.190136	-0.260811	-0.182513	-0.335198	-0.42087	0.0390745	-0.10278	-0.155287	-0.105149	-0.26937	-0.667789	-0.336155	-0.250104	-0.0767828
257.2	-0.0617144	-0.0139218	0.0388011	-0.0101442	-0.197121	-0.218596	0.00209778	-0.0536693	-0.354469	-0.0787674	0.0676323	-0.142619	-0.271963	-0.55942	-0.382745	-0.206275	-0.101343	-0.252436	-0.438102	-0.113002	-0.0943685	-0.901607	-0.397378	-0.470456	-0.116053	-0.191459	-0.219476	-0.0108608	0.00913158	-0.111527	-0.278749	-0.35379	-0.0371296	-0.300317	0.0288603	-0.179034	-0.232597	-0.174878	-0.350148	-0.452162	-0.0193341	-0.0423577	-0.158154	-0.144898	-0.292823	-0.650254	-0.337411	-0.256249	-0.0593692
257.1	-0.113448	0.0244584	0.08203	-0.0077879	-0.185148	-0.23972	-0.0133925	-0.0407749	-0.315253	-0.0403349	0.045437	-0.19627	-0.258504	-0.557487	-0.409251	-0.228379	-0.129417	-0.222741	-0.384032	-0.0583805	-0.0775579	-0.863734	-0.448591	-0.4946	-0.0908354	-0.180986	-0.213248	-0.0042229	-0.0065385	-0.116204	-0.245319	-0.349763	-0.0636864	-0.291684	-0.0395526	-0.208547	-0.221376	-0.159179	-0.34354	-0.43593	-0.0358214	-0.0471362	-0.208875	-0.123311	-0.300214	-0.723487	-0.332028	-0.304045	-0.0847104
257	-0.152695	0.0803813	0.0406497	-0.0087619	-0.209398	-0.23566	0.00669464	-0.059104	-0.337062	-0.0371001	0.0429301	-0.196627	-0.309306	-0.605684	-0.353709	-0.237666	-0.135979	-0.220975	-0.380258	-0.107355	-0.0926282	-0.818955	-0.403662	-0.471516	-0.141038	-0.176207	-0.135464	0.0198426	-0.0049871	-0.156793	-0.202367	-0.3096	-0.0579669	-0.272886	-0.0367345	-0.246441	-0.215946	-0.137694	-0.307422	-0.425297	-0.0333052	-0.0590867	-0.179835	-0.137316	-0.313642	-0.755864	-0.40187	-0.284637	-0.0846071
256.9	-0.170426	0.0442013	0.063963	0.0304799	-0.22212	-0.238062	-0.0127914	-0.0634592	-0.307596	-0.0356842	0.055094	-0.189937	-0.323839	-0.575512	-0.327542	-0.263001	-0.139019	-0.234572	-0.40404	-0.147912	-0.10156	-0.890773	-0.45197	-0.485402	-0.146462	-0.16608	-0.155774	-0.0038886	-0.0777543	-0.103876	-0.204152	-0.301256	-0.0422339	-0.264378	-0.0643761	-0.188933	-0.249813	-0.211443	-0.324579	-0.440391	-0.0375586	-0.0755399	-0.150698	-0.149405	-0.292411	-0.761803	-0.385807	-0.293785	-0.0801156
256.8	-0.127957	0.0339937	0.0243235	0.0607038	-0.199087	-0.242304	0.0093502	-0.0791244	-0.350125	-0.0061461	0.0528334	-0.185216	-0.294127	-0.627988	-0.283626	-0.256234	-0.17935	-0.265288	-0.437577	-0.146821	-0.0875033	-0.942432	-0.457505	-0.504191	-0.135962	-0.138781	-0.163188	-0.0630951	-0.119637	-0.0647498	-0.157474	-0.26341	-0.058658	-0.228366	-0.0344447	-0.217603	-0.237638	-0.213877	-0.372484	-0.437785	-0.0577642	-0.0990293	-0.169492	-0.17771	-0.296208	-0.768587	-0.282025	-0.321173	-0.0517339
256.7	-0.123703	0.00712754	0.034604	0.0865779	-0.214779	-0.263083	0.0248332	-0.11645	-0.327919	-0.0247392	0.050274	-0.146075	-0.33314	-0.573032	-0.221744	-0.259479	-0.19874	-0.264558	-0.497644	-0.148969	-0.106189	-0.969004	-0.445736	-0.554257	-0.169772	-0.117334	-0.200592	-0.0853888	-0.106667	-0.0670748	-0.17661	-0.252377	-0.0474864	-0.206676	-0.0367491	-0.225493	-0.196753	-0.246696	-0.333916	-0.455722	-0.0638818	-0.0921898	-0.116443	-0.236294	-0.296324	-0.732086	-0.328969	-0.327356	-0.0998653
256.6	-0.121923	0.00828228	0.049796	0.0366161	-0.205695	-0.197666	0.0382679	-0.143961	-0.303314	-0.0120296	0.0686153	-0.170896	-0.359612	-0.560449	-0.239437	-0.228857	-0.157228	-0.24211	-0.483955	-0.197683	-0.131745	-0.909024	-0.453043	-0.545783	-0.16029	-0.137623	-0.198628	-0.0558847	-0.0620187	-0.060251	-0.194064	-0.286257	-0.0290835	-0.22172	-0.0660652	-0.200489	-0.176455	-0.187799	-0.335202	-0.451172	-0.0751715	-0.0871361	-0.105196	-0.217638	-0.305305	-0.728502	-0.322809	-0.309421	-0.105267
256.5	-0.115023	-0.0081063	0.0715993	0.043202	-0.224782	-0.20916	0.0377319	-0.140422	-0.279241	-0.0073282	0.105763	-0.168228	-0.373275	-0.557395	-0.266655	-0.179631	-0.202199	-0.238386	-0.536083	-0.175993	-0.103447	-0.896682	-0.483536	-0.476937	-0.115728	-0.142771	-0.216302	-0.109135	-0.0571047	-0.0584017	-0.219888	-0.298839	-0.0383339	-0.209903	-0.0443774	-0.161893	-0.0989196	-0.160232	-0.350364	-0.447578	-0.0912105	-0.0553735	-0.134273	-0.247755	-0.368352	-0.713814	-0.368273	-0.278849	-0.0840185
256.4	-0.140013	-0.0039657	0.0578621	0.0535825	-0.269651	-0.205931	0.0628604	-0.146222	-0.286182	0.0345399	0.0961748	-0.151518	-0.353695	-0.549273	-0.256807	-0.122061	-0.238783	-0.198735	-0.524503	-0.218657	-0.0794035	-0.874051	-0.490459	-0.459923	-0.109635	-0.202738	-0.201327	-0.115556	-0.079891	-0.118453	-0.210302	-0.293533	-0.0449034	-0.210684	-0.0494091	-0.18188	-0.0551861	-0.197223	-0.297684	-0.438251	-0.0933743	-0.0225954	-0.0920104	-0.228526	-0.373007	-0.698163	-0.33781	-0.216646	-0.0594036
256.3	-0.100843	0.0266861	0.0988853	0.0340654	-0.244515	-0.222668	0.123822	-0.128337	-0.231499	-0.0126382	0.0987009	-0.120862	-0.359133	-0.540984	-0.283901	-0.161488	-0.225923	-0.168856	-0.513089	-0.184173	-0.0466242	-0.915398	-0.534156	-0.445489	-0.067443	-0.260287	-0.142969	-0.095822	-0.106022	-0.108612	-0.171222	-0.291848	-0.0961418	-0.18247	-0.0682144	-0.204748	-0.105977	-0.244376	-0.292278	-0.398959	-0.129745	-0.0385853	-0.106705	-0.207008	-0.37891	-0.694288	-0.332166	-0.200048	-0.0645049
256.2	-0.0620632	0.0410097	0.0581612	0.0319084	-0.220078	-0.282399	0.127697	-0.0850084	-0.22431	-0.0170065	0.101739	-0.130135	-0.33107	-0.520663	-0.325671	-0.133643	-0.218789	-0.132188	-0.534283	-0.19557	-0.0389644	-0.967756	-0.550624	-0.466523	-0.0578998	-0.244663	-0.140395	-0.130838	-0.126437	-0.0660031	-0.196588	-0.293095	-0.160738	-0.183699	-0.0426469	-0.220251	-0.120536	-0.216888	-0.267102	-0.413589	-0.104639	-0.0303803	-0.0902502	-0.204306	-0.296227	-0.669912	-0.287863	-0.219294	-0.0790426
256.1	-0.0651544	0.0359453	0.0798458	0.0917384	-0.231362	-0.244593	0.0816418	-0.0822908	-0.227923	0.0243815	0.103196	-0.124096	-0.278304	-0.497522	-0.267697	-0.096939	-0.205593	-0.120299	-0.50922	-0.241029	-0.0148961	-0.912091	-0.548361	-0.510091	-0.117969	-0.226409	-0.130019	-0.135692	-0.14143	-0.101143	-0.211724	-0.289083	-0.169473	-0.203859	-0.0211283	-0.220091	-0.125954	-0.274157	-0.316298	-0.415905	-0.0922451	0.00994263	-0.0913658	-0.213688	-0.221067	-0.628717	-0.384505	-0.237218	-0.0690717
256	-0.0956034	0.0429127	0.146928	0.0811177	-0.225745	-0.281151	0.0962306	-0.0385575	-0.195503	0.0404951	0.101324	-0.125306	-0.221678	-0.586303	-0.309295	-0.109246	-0.217506	-0.10226	-0.488604	-0.234864	-0.0212129	-0.910169	-0.595321	-0.530236	-0.145895	-0.207549	-0.073344	-0.160341	-0.148405	-0.110633	-0.224846	-0.32449	-0.15846	-0.210784	-0.0718622	-0.230398	-0.118032	-0.299532	-0.329518	-0.385711	-0.0821333	0.0098058	-0.0649242	-0.243234	-0.228267	-0.634306	-0.351804	-0.22758	-0.0686654
255.9	-0.0694937	0.0909411	0.126962	0.110853	-0.236211	-0.264295	0.112441	-0.059617	-0.183787	0.0481913	0.136072	-0.104645	-0.179515	-0.611176	-0.328574	-0.0757999	-0.234953	-0.0858535	-0.472913	-0.250328	-0.0436718	-0.861889	-0.623833	-0.538427	-0.205832	-0.214677	-0.0616989	-0.211924	-0.186752	-0.107192	-0.240169	-0.389721	-0.135862	-0.193195	-0.0946099	-0.190409	-0.127352	-0.349064	-0.294047	-0.350741	-0.103166	0.0207233	-0.113021	-0.224586	-0.204711	-0.649913	-0.340722	-0.232658	-0.0912847
255.8	-0.0401657	0.0754257	0.132442	0.0484487	-0.224111	-0.2806	0.142204	-0.069211	-0.13438	0.00970007	0.128348	-0.100679	-0.228363	-0.581939	-0.366923	-0.0279549	-0.233614	-0.14563	-0.426204	-0.230545	-0.0733949	-0.894047	-0.64449	-0.494702	-0.192185	-0.233177	-0.0727362	-0.202147	-0.171748	-0.125401	-0.186964	-0.400007	-0.127268	-0.191335	-0.0677319	-0.15399	-0.142379	-0.327634	-0.315374	-0.297505	-0.0663434	0.046625	-0.0901163	-0.204754	-0.208562	-0.604873	-0.308181	-0.193928	-0.0763256
255.7	-0.0217567	0.0721109	0.142801	0.0246128	-0.241176	-0.280037	0.122306	-0.0614665	-0.132344	-0.0004395	0.162091	-0.0506444	-0.202208	-0.599542	-0.307668	0.0119485	-0.21807	-0.162877	-0.47902	-0.287189	-0.0710524	-0.879657	-0.654818	-0.54885	-0.225404	-0.207007	-0.110938	-0.223583	-0.216653	-0.0830951	-0.17892	-0.31902	-0.0962266	-0.221771	-0.0955401	-0.15401	-0.153029	-0.333335	-0.356352	-0.249823	-0.0235709	0.124922	-0.0826295	-0.237082	-0.177711	-0.616132	-0.293145	-0.231052	-0.107921
255.6	-0.0228358	0.0456798	0.152412	0.0973656	-0.293134	-0.303037	0.109652	-0.0443023	-0.192098	-0.0143144	0.175999	-0.0595174	-0.192307	-0.492599	-0.312782	-0.0124865	-0.172743	-0.137479	-0.498108	-0.292045	-0.0876788	-0.936392	-0.669639	-0.490401	-0.226953	-0.17132	-0.113676	-0.254183	-0.200548	-0.109894	-0.207709	-0.359	-0.0914135	-0.240651	-0.100751	-0.0904418	-0.181125	-0.359771	-0.371832	-0.262663	-0.0544164	0.0895969	-0.0466221	-0.223918	-0.191966	-0.606453	-0.341581	-0.218391	-0.10624
255.5	-0.0288742	0.0665958	0.17598	0.144013	-0.30209	-0.273439	0.111984	-0.051118	-0.159382	-0.0373892	0.137484	-0.108762	-0.201533	-0.494661	-0.293438	-0.0209497	-0.16882	-0.0973232	-0.463601	-0.308595	-0.0974237	-0.935148	-0.641319	-0.518673	-0.246351	-0.0637445	-0.104687	-0.285561	-0.209106	-0.147302	-0.21768	-0.318637	-0.0681072	-0.20835	-0.056517	-0.10227	-0.208138	-0.343885	-0.390148	-0.239626	0.00948341	0.0805761	0.00941496	-0.161626	-0.164197	-0.627483	-0.279124	-0.182522	-0.119878
255.4	-0.0287889	0.0685677	0.157873	0.0997776	-0.310599	-0.259116	0.0941427	-0.0558989	-0.195618	0.00286213	0.146736	-0.10443	-0.200747	-0.554446	-0.307852	0.00410214	-0.199309	-0.137265	-0.43585	-0.339693	-0.153734	-0.935769	-0.669191	-0.458124	-0.276612	-0.0905315	-0.0833493	-0.238543	-0.252092	-0.167963	-0.230264	-0.347089	-0.0736518	-0.156288	-0.0165937	-0.0976053	-0.200887	-0.359778	-0.391626	-0.186222	-0.0170904	0.142135	-0.0322164	-0.126303	-0.114348	-0.617203	-0.232123	-0.154106	-0.0970876
255.3	-0.0526653	0.0327678	0.168941	0.11782	-0.306157	-0.234356	0.110135	-0.105569	-0.188633	-0.0244508	0.0936779	-0.16161	-0.259456	-0.551163	-0.352948	-0.0010629	-0.248109	-0.203968	-0.373352	-0.354043	-0.118829	-0.913542	-0.716813	-0.435098	-0.275453	-0.10847	-0.106051	-0.254791	-0.278426	-0.151672	-0.212489	-0.350287	-0.0740225	-0.133763	0.00890725	-0.142357	-0.213334	-0.357875	-0.372442	-0.178219	-0.0123478	0.114674	-0.0131731	-0.113009	-0.120155	-0.572755	-0.223713	-0.177335	-0.11292
255.2	-0.0857278	0.0311902	0.184285	0.147115	-0.279891	-0.247019	0.103354	-0.111887	-0.179606	-0.0492192	0.080797	-0.180556	-0.27608	-0.520238	-0.308986	0.0129351	-0.204489	-0.224625	-0.350072	-0.356461	-0.147659	-0.877312	-0.746848	-0.363958	-0.242725	-0.100425	-0.138524	-0.249778	-0.229624	-0.159804	-0.238576	-0.314722	-0.0794479	-0.109684	-0.0110384	-0.133674	-0.267503	-0.365173	-0.369552	-0.180924	-0.0088561	0.100632	-0.0248595	-0.125995	-0.110429	-0.57182	-0.2319	-0.176096	-0.125286
255.1	-0.0366373	-0.0006744	0.184976	0.134504	-0.304529	-0.250641	0.0961174	-0.0975458	-0.142567	-0.0644244	0.115987	-0.13396	-0.314881	-0.478684	-0.270746	0.0679614	-0.183302	-0.185795	-0.361403	-0.383492	-0.199772	-0.837429	-0.76102	-0.317248	-0.233509	-0.083158	-0.164462	-0.290739	-0.18354	-0.126485	-0.256061	-0.280353	-0.103422	-0.0728488	-0.0296659	-0.14988	-0.236069	-0.346072	-0.414317	-0.164968	0.00621582	0.122945	-0.0444291	-0.101729	-0.167064	-0.630601	-0.210101	-0.191564	-0.10958
255	-0.0566686	0.0160671	0.147681	0.0345446	-0.315103	-0.3105	0.109815	-0.0921643	-0.168252	-0.0266183	0.102532	-0.0970795	-0.33843	-0.466102	-0.278381	0.0420631	-0.206704	-0.185314	-0.271581	-0.412764	-0.217889	-0.831134	-0.756695	-0.342571	-0.301887	-0.075805	-0.154652	-0.277723	-0.133643	-0.158541	-0.214066	-0.246424	-0.0890867	-0.0657379	-0.0645955	-0.140945	-0.24693	-0.360067	-0.432792	-0.188017	0.00559909	0.115157	-0.0514501	-0.0523773	-0.125945	-0.705156	-0.213621	-0.178135	-0.151908
254.9	-0.0411348	0.0103017	0.123447	-0.0601237	-0.310995	-0.266866	0.0557534	-0.16521	-0.122143	-0.0417761	0.0732394	-0.0756329	-0.355651	-0.428956	-0.317079	0.00471334	-0.230673	-0.175373	-0.232521	-0.440639	-0.270221	-0.842783	-0.725551	-0.355645	-0.319431	-0.043338	-0.178981	-0.286099	-0.10247	-0.17594	-0.207033	-0.244502	-0.096432	-0.0872599	-0.0738239	-0.087825	-0.271449	-0.336063	-0.406135	-0.179164	0.0286124	0.110331	-0.0716026	-0.0234936	-0.163732	-0.712194	-0.158597	-0.163711	-0.144054
254.8	-0.0604441	-0.0518083	0.141794	-0.0413525	-0.323901	-0.294466	0.0545174	-0.185308	-0.079809	-0.0690157	-0.0075291	-0.0192061	-0.363194	-0.444682	-0.29607	0.0454298	-0.260997	-0.228435	-0.242498	-0.43482	-0.277199	-0.887037	-0.74733	-0.302151	-0.296068	-0.0365308	-0.141307	-0.244967	-0.0183647	-0.192013	-0.164595	-0.232558	-0.10555	-0.144931	-0.070554	-0.0755596	-0.278409	-0.332984	-0.398784	-0.206191	-0.0020877	0.0692973	-0.0586784	-0.0661967	-0.202669	-0.761787	-0.160992	-0.118981	-0.158815
254.7	-0.0396995	-0.0614601	0.135012	-0.0833277	-0.2649	-0.273552	0.0299473	-0.188591	-0.0966688	-0.0492748	0.00544002	0.00571043	-0.346827	-0.445703	-0.291182	0.0213637	-0.265854	-0.224201	-0.226937	-0.444686	-0.2217	-0.89256	-0.776158	-0.26269	-0.284648	-0.0859664	-0.150331	-0.28904	0.00712533	-0.192079	-0.180318	-0.284742	-0.0552018	-0.168607	-0.0762835	-0.0768562	-0.316098	-0.334709	-0.40409	-0.236416	-0.0396378	0.066302	-0.0708061	-0.056001	-0.245763	-0.765452	-0.160747	-0.204326	-0.122011
254.6	0.0127809	-0.0639957	0.154854	-0.0679575	-0.286921	-0.190203	-0.0103697	-0.154887	-0.0640674	-0.046105	-0.0141671	0.02106	-0.358619	-0.470716	-0.299192	0.0111153	-0.240892	-0.195558	-0.200191	-0.410546	-0.19482	-0.859254	-0.73622	-0.284155	-0.342615	-0.117939	-0.188241	-0.307854	0.00299085	-0.182928	-0.17808	-0.270763	-0.0869062	-0.136664	-0.0423166	-0.0750613	-0.371953	-0.353172	-0.3741	-0.210573	-0.0739349	0.0980256	-0.0756149	-0.111349	-0.253679	-0.737869	-0.182956	-0.230486	-0.11737
254.5	-0.0170552	-0.0748918	0.162305	-0.121628	-0.298225	-0.179448	-0.0329824	-0.150795	-0.0827671	-0.0146099	0.00786694	0.0719502	-0.370336	-0.442591	-0.283926	0.0272625	-0.249498	-0.247748	-0.205469	-0.41762	-0.184892	-0.894687	-0.767172	-0.288333	-0.382244	-0.161567	-0.221683	-0.267525	-0.0151016	-0.210474	-0.166829	-0.236432	-0.128391	-0.186167	-0.0382444	-0.068378	-0.367975	-0.326773	-0.306944	-0.203852	-0.0357357	0.0740624	-0.0731985	-0.134466	-0.282509	-0.70445	-0.195366	-0.272699	-0.125732
254.4	-0.0050241	-0.0794667	0.125021	-0.13756	-0.30617	-0.103681	-0.0317766	-0.157914	-0.0975968	0.0535384	-0.0353855	0.0976431	-0.338258	-0.43553	-0.302512	0.0629352	-0.248588	-0.239212	-0.194747	-0.401908	-0.199051	-0.856033	-0.778748	-0.317931	-0.338156	-0.106347	-0.229384	-0.259589	-0.0096427	-0.240909	-0.159949	-0.257376	-0.08709	-0.184763	-0.0564338	-0.0269852	-0.39103	-0.323201	-0.300141	-0.160762	-0.048684	0.0313874	-0.0401046	-0.0676585	-0.268633	-0.751926	-0.217395	-0.235943	-0.061886
254.3	0.0256382	-0.0922669	0.0863882	-0.180808	-0.308715	-0.0591289	-0.0169269	-0.151692	-0.0732177	0.0279493	-0.0493642	0.085626	-0.360698	-0.465726	-0.309212	0.050701	-0.253872	-0.239168	-0.216252	-0.424248	-0.196458	-0.837675	-0.838376	-0.315691	-0.320364	-0.0988886	-0.256903	-0.24552	-0.0194468	-0.242516	-0.18093	-0.225063	-0.0917846	-0.172749	0.00861903	-0.0203557	-0.403227	-0.282341	-0.295668	-0.140896	-0.0562354	0.0300077	0.0159803	-0.067525	-0.256794	-0.769649	-0.262793	-0.192515	-0.0387063
254.2	0.0402614	-0.0684995	0.0786443	-0.179292	-0.308246	-0.0574618	-0.002823	-0.157312	-0.0722707	0.079406	-0.0457315	0.0967702	-0.351843	-0.461136	-0.341201	0.0216386	-0.243039	-0.263083	-0.201766	-0.399503	-0.167674	-0.906491	-0.846543	-0.335624	-0.321852	-0.116262	-0.212827	-0.256707	0.00292329	-0.217845	-0.192278	-0.205598	-0.109917	-0.168217	0.035957	-0.033804	-0.419714	-0.278044	-0.276368	-0.0956694	-0.0265508	0.0389002	0.0147022	-0.0489342	-0.240023	-0.765446	-0.227774	-0.205733	-0.0741599
254.1	0.0807859	-0.0401212	0.055789	-0.163271	-0.326072	-0.0771128	-0.0239938	-0.136677	-0.0656078	0.0475198	-0.0259359	0.168151	-0.343962	-0.514296	-0.32876	0.010962	-0.213027	-0.240276	-0.168705	-0.376037	-0.154991	-0.872994	-0.840726	-0.361273	-0.298756	-0.0918022	-0.238491	-0.278897	-0.056051	-0.196682	-0.165225	-0.183374	-0.0673285	-0.175487	0.0487995	-0.0509333	-0.453536	-0.287263	-0.24206	-0.0922474	-0.0402972	0.0311982	0.0642949	-0.0694541	-0.252564	-0.801657	-0.21806	-0.208351	-0.0694799
254	0.10468	-0.0484207	0.0621785	-0.132937	-0.325404	-0.0916059	-0.0369506	-0.125848	-0.0315091	0.078485	-0.0037416	0.159115	-0.383828	-0.545863	-0.3357	0.00200195	-0.246708	-0.18992	-0.150115	-0.391212	-0.148295	-0.853692	-0.793702	-0.418944	-0.318741	-0.0804704	-0.254854	-0.281728	-0.0746661	-0.239706	-0.220975	-0.171618	-0.0791321	-0.196694	0.0552164	-0.0210429	-0.446298	-0.257758	-0.205781	-0.0287052	-0.0093193	-0.0369563	0.0374844	-0.115005	-0.213243	-0.799025	-0.264792	-0.16316	-0.0821775
253.9	0.123106	-0.0648672	0.04422	-0.18396	-0.310117	-0.067282	-0.0757105	-0.108644	-0.02771	0.0313487	-0.0251994	0.167552	-0.381119	-0.592971	-0.301737	0.00689091	-0.225862	-0.204773	-0.185148	-0.404057	-0.125078	-0.835958	-0.746693	-0.425877	-0.34254	-0.101616	-0.27213	-0.25201	-0.0821583	-0.220115	-0.190287	-0.180325	-0.10948	-0.18168	0.0544461	0.0119917	-0.444847	-0.232055	-0.208815	-0.0098815	0.0145956	-0.0325949	0.0435636	-0.13347	-0.191286	-0.833156	-0.256651	-0.132662	-0.11785
253.8	0.126667	-0.109504	0.100302	-0.192945	-0.297853	-0.0297321	-0.0531779	-0.0487677	0.0156703	-0.0043823	-0.0013143	0.180556	-0.382235	-0.597872	-0.33441	0.00880296	-0.208631	-0.192876	-0.16821	-0.348558	-0.0772504	-0.855095	-0.845095	-0.429009	-0.296663	-0.1117	-0.3199	-0.23909	-0.0480382	-0.213591	-0.199135	-0.194208	-0.116005	-0.214592	0.054208	0.0473555	-0.47607	-0.229437	-0.185409	-0.0341729	0.0680833	-0.0157355	0.0382443	-0.147955	-0.150436	-0.889944	-0.249842	-0.100874	-0.147738
253.7	0.105999	-0.118166	0.0691694	-0.206562	-0.289906	-0.0210345	-0.0470551	-0.0646704	0.00327336	-0.0198041	-0.0596634	0.224825	-0.33991	-0.567343	-0.375326	-0.0137872	-0.216776	-0.163162	-0.128987	-0.342945	-0.0918489	-0.875559	-0.815286	-0.405288	-0.306857	-0.114275	-0.293434	-0.183143	0.0001624	-0.201474	-0.237122	-0.210278	-0.0964208	-0.226828	0.0507591	0.0596676	-0.483904	-0.196095	-0.186483	-0.004493	0.0624302	-0.0791459	0.0315272	-0.128488	-0.154094	-0.917098	-0.249585	-0.0689562	-0.13123
253.6	0.0910938	-0.129582	0.0603339	-0.207076	-0.318579	-0.017372	-0.0069209	-0.0834567	0.0305378	-0.0392409	-0.10872	0.220162	-0.385482	-0.538411	-0.391024	-0.036103	-0.189905	-0.127516	-0.161959	-0.378391	-0.145855	-0.821891	-0.798794	-0.430194	-0.345084	-0.100521	-0.271969	-0.171411	0.0304661	-0.227703	-0.274434	-0.19189	-0.101038	-0.215021	-0.0459139	0.0846286	-0.492513	-0.243119	-0.124496	-0.0009194	0.0654454	0.00509588	0.00779345	-0.0965593	-0.183822	-1.00224	-0.279886	-0.0216673	-0.093995
253.5	0.116721	-0.0922541	0.0884998	-0.24494	-0.261613	0.0170122	0.00232097	-0.0796709	0.0238496	-0.043962	-0.12145	0.189285	-0.369859	-0.550759	-0.40801	-0.0387476	-0.145647	-0.108975	-0.121146	-0.386458	-0.132793	-0.832394	-0.793777	-0.400816	-0.2824	-0.0603586	-0.279417	-0.1761	0.0613772	-0.23966	-0.259788	-0.174923	-0.0802553	-0.200355	-0.0329564	0.100683	-0.502636	-0.250824	-0.114742	0.0284174	0.0538294	0.0323904	0.0308356	-0.0679217	-0.148228	-1.0282	-0.270313	-0.0194189	-0.0704191
253.4	0.084391	-0.0835313	0.0902791	-0.198956	-0.281313	0.00013147	-0.0044974	-0.0891744	0.0455989	-0.0804623	-0.112876	0.220703	-0.361347	-0.557326	-0.349507	-0.0298351	-0.159897	-0.12571	-0.13233	-0.3669	-0.0799763	-0.856883	-0.810543	-0.396769	-0.282048	-0.0700738	-0.320895	-0.177979	0.017709	-0.250034	-0.274193	-0.176684	-0.113246	-0.178993	-0.0164685	0.116059	-0.534019	-0.244376	-0.0645497	0.0381666	0.0317145	0.0176622	0.0298813	-0.0581745	-0.109113	-0.952876	-0.243922	-0.0137601	-0.0256549
253.3	0.0869477	-0.0750834	0.0590142	-0.1967	-0.257074	0.0210944	-0.0351817	-0.113984	0.046789	-0.091744	-0.110502	0.224893	-0.348376	-0.556271	-0.334663	-0.0444859	-0.0763871	-0.109053	-0.0639477	-0.318479	-0.09833	-0.845592	-0.798312	-0.409382	-0.255036	-0.0742224	-0.29914	-0.171968	-0.0067345	-0.268208	-0.238003	-0.201191	-0.124132	-0.194956	0.00028296	0.166446	-0.55903	-0.253661	-0.133918	0.028971	0.029284	-0.0170458	0.0442428	-0.0550676	-0.100994	-0.948227	-0.214085	-0.0202746	-0.0398563
253.2	0.125573	-0.0838045	0.0689631	-0.231372	-0.219658	0.00699991	-0.0329114	-0.105363	0.0440795	-0.189744	-0.107996	0.222593	-0.326354	-0.521977	-0.345886	-0.0899234	-0.0694197	-0.122035	-0.106024	-0.250378	-0.103615	-0.844191	-0.833212	-0.397567	-0.262104	-0.0149263	-0.295761	-0.167738	-0.0351338	-0.257609	-0.233979	-0.223422	-0.118698	-0.195269	-0.0291152	0.167235	-0.553944	-0.270752	-0.155029	0.0259024	0.0436861	-0.038882	0.0239536	-0.0248858	-0.133787	-0.998814	-0.251536	-0.0448565	-0.0155633
253.1	0.0829217	-0.115222	0.0443153	-0.21963	-0.204861	-0.0139172	-0.0738378	-0.0991079	0.0418323	-0.169508	-0.0744565	0.202276	-0.275152	-0.541233	-0.356726	-0.0814447	-0.0631452	-0.127836	-0.0597832	-0.285862	-0.115395	-0.827058	-0.814211	-0.358282	-0.334433	-0.0043175	-0.313729	-0.207515	-0.0135425	-0.280197	-0.242223	-0.254634	-0.0751139	-0.217027	0.0300135	0.130947	-0.558493	-0.16768	-0.16748	0.0345921	0.0199246	-0.0901094	-0.0053308	-0.0168584	-0.139171	-0.999943	-0.25689	-0.0409593	0.0344658
253	0.0503623	-0.165695	0.045053	-0.258036	-0.245717	-0.0093866	-0.0494849	-0.105165	0.0463408	-0.160164	-0.0631246	0.200988	-0.287263	-0.582946	-0.289383	-0.0706136	-0.0942026	-0.176583	-0.0443554	-0.271666	-0.128454	-0.78497	-0.842939	-0.327648	-0.319244	-0.0006876	-0.271335	-0.162658	-4.86e-05	-0.327719	-0.180997	-0.263983	-0.0153429	-0.253044	0.0156671	0.142618	-0.577622	-0.163958	-0.167381	0.0706839	0.0284572	-0.0817302	0.00357011	-0.0398632	-0.17527	-1.02895	-0.301404	-0.0455609	0.0265409
252.9	0.0314665	-0.0739324	0.0311833	-0.280766	-0.253188	0.053732	0.00394485	-0.072825	0.0320447	-0.168245	-0.0473945	0.171071	-0.360676	-0.56044	-0.326695	-0.104944	-0.120891	-0.143428	-0.0362488	-0.260057	-0.137414	-0.80118	-0.801623	-0.284893	-0.319043	0.0222828	-0.274294	-0.158502	-0.0159261	-0.321323	-0.175939	-0.236796	-0.0298781	-0.26951	-0.0112436	0.083267	-0.57658	-0.168728	-0.140614	0.0711659	0.0287289	-0.0932706	0.0320189	-0.0087814	-0.18611	-1.02111	-0.237407	-0.0496934	-0.0057406
252.8	0.0289092	-0.0664922	-0.0237023	-0.316748	-0.202791	0.0663415	-0.0022926	-0.131054	0.0540775	-0.210884	-0.0673225	0.1639	-0.430154	-0.489427	-0.301635	-0.0610728	-0.0825488	-0.140106	-0.0229791	-0.226227	-0.125392	-0.856644	-0.787819	-0.316478	-0.283597	0.0286386	-0.274928	-0.169003	-0.0178104	-0.350279	-0.125873	-0.225625	0.0148631	-0.296134	0.0402198	0.0705481	-0.563932	-0.152511	-0.0837516	0.0547157	-0.0301126	-0.0755697	0.0411315	0.0342061	-0.197472	-1.07309	-0.198135	-0.0747872	-6.83e-05
252.7	0.0105445	-0.0685588	0.024939	-0.364983	-0.209412	0.0632821	-0.0163277	-0.0772214	0.0146608	-0.183588	-0.0725941	0.172551	-0.438821	-0.509058	-0.279273	-0.0546862	-0.0670115	-0.176521	-0.0529043	-0.232886	-0.138195	-0.88043	-0.764954	-0.351398	-0.253359	0.0111281	-0.319772	-0.189742	-0.0066001	-0.35557	-0.135814	-0.21306	0.00876836	-0.346107	0.0403064	0.034323	-0.617337	-0.119501	-0.116634	0.0463257	-0.0380805	-0.0879899	0.0227205	0.00574247	-0.185185	-1.06672	-0.253298	-0.114045	0.0167528
252.6	-0.0110337	-0.0527805	0.00301186	-0.336802	-0.183295	0.0468972	-0.0242402	-0.0806389	0.0338089	-0.131723	-0.0961008	0.193319	-0.408913	-0.516361	-0.270065	-0.0905566	-0.0881772	-0.130924	-0.106787	-0.2241	-0.141502	-0.922282	-0.786024	-0.375609	-0.279177	0.0456131	-0.298259	-0.176086	-0.028242	-0.353431	-0.209804	-0.195755	0.0498465	-0.365835	0.00409297	0.00384934	-0.615093	-0.113327	-0.128452	-0.0055931	-0.0662302	-0.0549712	0.0152584	-0.0150356	-0.19714	-1.09187	-0.281115	-0.160111	0.00076388
252.5	-0.0322447	-0.108837	0.00386832	-0.346471	-0.180115	0.0549835	-0.0223146	-0.121442	0.0296599	-0.186973	-0.10897	0.150687	-0.432707	-0.527696	-0.284571	-0.0634318	-0.10933	-0.120456	-0.076736	-0.183932	-0.157593	-0.923643	-0.75432	-0.309677	-0.246018	-0.0440319	-0.248367	-0.153191	0.00205612	-0.424503	-0.211592	-0.251931	-0.0003531	-0.34573	0.0483504	-0.0095725	-0.630929	-0.0587411	-0.107768	0.0178086	-0.0875077	-0.112214	0.0297643	0.00401167	-0.222349	-1.10662	-0.281134	-0.141577	0.0272165
252.4	-0.0211173	-0.0677303	-0.0172708	-0.379032	-0.149335	0.108937	-0.0471749	-0.151974	0.0828872	-0.182721	-0.161272	0.112537	-0.414198	-0.576044	-0.32458	-0.072192	-0.139023	-0.174353	-0.131179	-0.192597	-0.138086	-0.924179	-0.710326	-0.338982	-0.266171	-0.0324358	-0.235924	-0.128	0.0341068	-0.434148	-0.209922	-0.244992	0.0105334	-0.344365	0.0538903	-0.051466	-0.629526	-0.0698601	-0.0665805	0.0486504	-0.0848039	-0.172819	0.0438285	0.00674729	-0.267156	-1.1001	-0.300296	-0.119432	0.0166134
252.3	-0.0904938	-0.0685663	-0.0172354	-0.408522	-0.202443	0.102356	-0.0150934	-0.138103	0.129993	-0.157097	-0.22076	0.137815	-0.419627	-0.612634	-0.294059	-0.0657787	-0.158204	-0.216891	-0.130108	-0.198464	-0.139124	-0.93893	-0.706463	-0.361733	-0.271272	-0.0454742	-0.242763	-0.147266	0.0178599	-0.395961	-0.157701	-0.297718	-0.0118098	-0.356974	0.0409032	-0.0118712	-0.660879	0.00233977	-0.0649314	0.0272744	-0.0813494	-0.138868	0.0203448	-0.0010199	-0.277395	-1.11347	-0.263172	-0.17416	0.00315957
252.2	-0.0699091	-0.0877084	-0.0076767	-0.440286	-0.217396	0.0460069	-0.0226267	-0.169487	0.0952255	-0.15819	-0.219512	0.129506	-0.449082	-0.599256	-0.31776	-0.107472	-0.110012	-0.173727	-0.191417	-0.158177	-0.136371	-0.915194	-0.678894	-0.396003	-0.276929	-0.0777841	-0.25283	-0.157791	0.0569916	-0.410166	-0.182777	-0.279462	-0.0176725	-0.361631	0.00502393	-0.0147675	-0.670311	0.00219895	-0.0146427	-0.0133098	-0.0954235	-0.161079	-0.0021754	-0.0232258	-0.276446	-1.14316	-0.332036	-0.228458	0.0542869
252.1	-0.0930162	-0.143464	-0.0508744	-0.478758	-0.216399	0.0523151	0.0181755	-0.160702	0.11627	-0.141611	-0.172437	0.128457	-0.403354	-0.589319	-0.283805	-0.0946126	-0.118526	-0.167669	-0.230777	-0.138338	-0.105395	-0.927635	-0.644317	-0.376144	-0.235699	-0.0963576	-0.272328	-0.127618	0.117084	-0.388256	-0.173465	-0.291174	-0.0412259	-0.442389	-0.0197839	-0.0042848	-0.678595	-0.0203654	-0.0135214	-0.0277374	-0.0688328	-0.209247	-0.0231366	-0.04042	-0.279803	-1.10706	-0.357453	-0.209071	0.037833
252	-0.0879044	-0.107368	-0.0790094	-0.456467	-0.245714	0.0123763	-0.0227455	-0.164262	0.127834	-0.113343	-0.192478	0.13201	-0.388354	-0.615748	-0.268001	-0.106645	-0.0919533	-0.117937	-0.26239	-0.158297	-0.101744	-0.920501	-0.651166	-0.375556	-0.222208	-0.135164	-0.284819	-0.145055	0.143406	-0.369873	-0.187198	-0.252675	-0.0563664	-0.45148	-0.0127394	-0.0119523	-0.686119	-0.0119591	-0.0234507	-0.0344449	-0.0441475	-0.167329	0.00073064	-0.026302	-0.302983	-1.12051	-0.324136	-0.180381	0.0335348
251.9	-0.0823127	-0.107576	-0.0804256	-0.483521	-0.206754	0.0256258	0.00327956	-0.147815	0.128352	-0.083433	-0.198467	0.119194	-0.336731	-0.637069	-0.273469	-0.0911337	-0.0877407	-0.137686	-0.262684	-0.182765	-0.07711	-0.92892	-0.652938	-0.394386	-0.277278	-0.160315	-0.263724	-0.135803	0.129286	-0.336808	-0.146517	-0.292624	-0.0940463	-0.474043	0.00373412	-0.0158827	-0.625663	0.0648201	-0.0152117	-0.0528903	-0.072774	-0.160026	0.0207101	-0.0022525	-0.310752	-1.14219	-0.373272	-0.228258	0.0688159
251.8	-0.136273	-0.080821	-0.0700993	-0.490637	-0.216077	0.0392239	-0.0018194	-0.163267	0.077376	-0.0889969	-0.248271	0.0646017	-0.302944	-0.662805	-0.285705	-0.100232	-0.104438	-0.165928	-0.266887	-0.195314	-0.0991937	-0.918654	-0.601594	-0.38671	-0.230364	-0.175084	-0.244466	-0.113288	0.109924	-0.369732	-0.101076	-0.313108	-0.0486844	-0.524939	0.0211987	-0.0517741	-0.650136	0.0579701	0.0292516	-0.0875252	-0.110976	-0.162856	0.00443949	0.0265341	-0.272758	-1.04995	-0.402657	-0.207548	0.00059778
251.7	-0.164944	-0.0904679	-0.0673983	-0.453717	-0.210165	0.0553859	0.00630198	-0.163388	0.0920846	-0.0889697	-0.231855	0.04075	-0.310386	-0.681261	-0.223071	-0.10577	-0.0920592	-0.149602	-0.266675	-0.166788	-0.140143	-1.00149	-0.628788	-0.401544	-0.205262	-0.197986	-0.226856	-0.106268	0.0895496	-0.391264	-0.122298	-0.342083	-0.0636042	-0.538967	-0.0042025	-0.0632959	-0.609657	0.057629	0.0277653	-0.0860285	-0.123656	-0.169257	-0.0051506	-0.0263405	-0.252672	-1.02216	-0.407968	-0.206891	0.0410647
251.6	-0.225883	-0.0679424	-0.0740841	-0.397891	-0.198059	0.0474407	0.0570727	-0.122857	0.086373	-0.0882964	-0.199022	-0.0040584	-0.309212	-0.714451	-0.205172	-0.0897882	-0.0964913	-0.140134	-0.29358	-0.171638	-0.0956615	-0.988645	-0.65	-0.400573	-0.191067	-0.200963	-0.152125	-0.102957	0.112803	-0.376092	-0.113649	-0.338061	-0.0845998	-0.538523	-0.0410612	-0.0948776	-0.611404	0.0252541	0.0180238	-0.104992	-0.15519	-0.173691	0.0209033	-0.0196826	-0.183964	-1.04897	-0.445267	-0.22639	0.0297083
251.5	-0.242871	-0.0297732	-0.0651464	-0.405311	-0.207752	0.00593009	0.0563276	-0.107504	0.0713909	-0.0674696	-0.160056	-0.0325399	-0.304457	-0.68003	-0.183698	-0.110164	-0.0992358	-0.120921	-0.283781	-0.202878	-0.05201	-0.966255	-0.620691	-0.418342	-0.192358	-0.197217	-0.173902	-0.0894098	0.0871113	-0.390166	-0.128113	-0.346841	-0.106581	-0.535575	-0.0094503	-0.0494426	-0.558763	-0.0087878	0.0542739	-0.136291	-0.174588	-0.126156	0.00825592	-0.0026091	-0.152144	-1.04826	-0.426221	-0.283394	0.0807502
251.4	-0.236658	-0.0018778	-0.0135675	-0.418377	-0.243493	0.0258646	0.0326768	-0.107033	0.0553334	-0.096709	-0.169502	-0.0587932	-0.288925	-0.690355	-0.139625	-0.134209	-0.127225	-0.0236364	-0.303177	-0.178486	-0.0586852	-0.934014	-0.595416	-0.47604	-0.198248	-0.200712	-0.167988	-0.079062	0.0107678	-0.385615	-0.12664	-0.346062	-0.101855	-0.498182	-0.0162264	-0.0551204	-0.539213	-0.0233114	0.0354118	-0.0936108	-0.124183	-0.132357	-0.0042523	-0.0310248	-0.115302	-1.0716	-0.45978	-0.242581	0.0706772
251.3	-0.287808	0.0324247	-0.0164636	-0.370799	-0.247094	0.00638958	0.0613119	-0.0969421	0.115891	-0.129232	-0.189931	-0.0662123	-0.321069	-0.693669	-0.178136	-0.1016	-0.110622	-0.0663006	-0.321723	-0.138578	-0.0962118	-0.98768	-0.591065	-0.500104	-0.195471	-0.185792	-0.159378	-0.0864804	-0.0388743	-0.452863	-0.144068	-0.35913	-0.125919	-0.472436	-0.0447292	-0.074374	-0.522049	-0.0992974	0.0343019	-0.0639215	-0.123756	-0.133146	-0.0081912	-0.0537023	-0.134968	-1.06362	-0.494138	-0.173252	0.054036
251.2	-0.301189	0.0303243	-0.0102807	-0.407371	-0.237254	0.0230828	0.0752669	-0.076087	0.149273	-0.156406	-0.157893	-0.0965613	-0.272721	-0.659894	-0.142597	-0.0521238	-0.027144	-0.0476038	-0.338236	-0.173688	-0.116776	-0.99679	-0.555918	-0.484285	-0.145355	-0.151028	-0.113738	-0.0715776	-0.0511243	-0.426585	-0.154083	-0.367066	-0.122099	-0.4662	-0.0409186	-0.0779181	-0.525602	-0.099939	0.0120372	-0.113058	-0.145468	-0.13927	0.0100707	-0.0035134	-0.140525	-1.06685	-0.509941	-0.146142	0.029341
251.1	-0.294779	0.0583254	-0.0218257	-0.348491	-0.194913	0.0211996	0.0959539	-0.0244013	0.180509	-0.214581	-0.14448	-0.136853	-0.283683	-0.648454	-0.169441	-0.158301	-0.0028409	-0.024954	-0.324607	-0.195379	-0.14413	-1.01099	-0.537278	-0.497643	-0.13133	-0.113079	-0.152497	-0.106868	-0.0163938	-0.38996	-0.140926	-0.336367	-0.127946	-0.413349	-0.0373121	-0.0832358	-0.550632	-0.0891642	-0.0196777	-0.100923	-0.170161	-0.100397	-0.0326003	-0.0076651	-0.107476	-1.04556	-0.450965	-0.136291	0.00527725
251	-0.309982	0.0068586	0.0168219	-0.353989	-0.228913	-0.0168247	0.0629807	0.00826043	0.20741	-0.222397	-0.0800117	-0.182652	-0.28288	-0.613729	-0.173004	-0.148879	0.0148593	-0.0260235	-0.33261	-0.196597	-0.176224	-1.0374	-0.553631	-0.446978	-0.118289	-0.137575	-0.197361	-0.163415	0.0655957	-0.421873	-0.128044	-0.346097	-0.100356	-0.41332	-0.0869471	-0.127293	-0.552404	-0.0982433	-0.0627472	-0.101805	-0.153067	-0.143668	-0.0659769	-0.042541	-0.15337	-1.08922	-0.500237	-0.209545	-0.0329455
250.9	-0.345235	0.0170809	0.0706224	-0.285275	-0.263136	-0.0171601	0.0323185	0.0123125	0.212807	-0.22594	-0.0972538	-0.182893	-0.301804	-0.643838	-0.193134	-0.189901	0.0383566	-0.0201939	-0.301477	-0.178157	-0.220709	-1.04406	-0.575641	-0.480983	-0.159633	-0.138289	-0.253428	-0.156506	0.089777	-0.402552	-0.0700124	-0.383693	-0.0982116	-0.430613	-0.108227	-0.167881	-0.500168	-0.109537	-0.0849927	-0.152245	-0.166222	-0.119788	-0.0839604	-0.0807343	-0.154657	-1.06687	-0.530512	-0.23635	-0.0338795
250.8	-0.317429	-0.003798	0.0924787	-0.226974	-0.23753	-0.0481637	-0.0008981	-0.0176779	0.250261	-0.225798	-0.100896	-0.212082	-0.320933	-0.625852	-0.163567	-0.152855	0.0236012	-0.0617952	-0.299944	-0.199263	-0.203897	-1.04781	-0.61496	-0.470981	-0.144892	-0.134589	-0.239233	-0.158847	0.0950653	-0.40146	-0.0681933	-0.347484	-0.0930286	-0.412857	-0.110392	-0.132008	-0.47759	-0.0758654	-0.0652648	-0.117099	-0.153169	-0.167283	-0.115861	-0.0789614	-0.120584	-1.0721	-0.51083	-0.27777	-0.0173752
250.7	-0.369894	0.0574167	0.0750537	-0.310267	-0.217819	-0.0614465	-0.0238075	-0.0570568	0.239286	-0.233404	-0.0811078	-0.189833	-0.355936	-0.575103	-0.190201	-0.16104	0.0866649	-0.0911869	-0.300392	-0.171236	-0.220853	-1.14208	-0.639758	-0.416635	-0.160801	-0.133796	-0.238693	-0.128768	0.0948702	-0.437922	-0.0385365	-0.378311	-0.0688352	-0.367558	-0.118991	-0.155624	-0.448644	-0.065514	-0.102139	-0.125212	-0.162149	-0.141181	-0.133108	-0.0721749	-0.126084	-1.06295	-0.5079	-0.323395	-0.0037847
250.6	-0.385966	0.0525565	0.0905578	-0.261619	-0.241884	-0.0205073	-0.0314304	-0.0598615	0.194732	-0.193803	-0.112131	-0.209925	-0.35937	-0.553686	-0.240367	-0.19716	0.12483	-0.0927638	-0.277497	-0.135966	-0.228202	-1.11812	-0.618407	-0.442495	-0.159957	-0.0996923	-0.205902	-0.144389	0.0829749	-0.423095	-0.0672656	-0.368093	-0.0611421	-0.370501	-0.0796518	-0.135221	-0.479998	-0.102664	-0.114121	-0.142726	-0.173429	-0.113413	-0.103451	-0.0412383	-0.155649	-1.09091	-0.510275	-0.315634	-0.0008175
250.5	-0.325893	0.0687009	0.088298	-0.271975	-0.26235	-0.0204486	-0.0312054	-0.0769287	0.152233	-0.17457	-0.124551	-0.214342	-0.365528	-0.4916	-0.281357	-0.216607	0.105441	-0.10381	-0.273471	-0.125117	-0.294238	-1.12353	-0.624872	-0.430529	-0.171548	-0.0901565	-0.224071	-0.141797	0.0642965	-0.402084	-0.125071	-0.3299	-0.074012	-0.362773	-0.0931037	-0.117949	-0.467124	-0.127387	-0.0673134	-0.136163	-0.256121	-0.11243	-0.103623	-0.0391989	-0.160761	-1.06615	-0.487161	-0.339159	0.017254
250.4	-0.382453	0.0445843	0.0637695	-0.294491	-0.223933	-0.0085342	-0.0905204	-0.111483	0.149665	-0.163868	-0.132872	-0.202871	-0.390485	-0.534147	-0.299344	-0.212808	0.152522	-0.0649577	-0.297286	-0.141324	-0.307014	-1.16785	-0.529867	-0.427945	-0.195406	-0.063892	-0.240527	-0.154921	0.0460605	-0.471823	-0.0818539	-0.319813	-0.0476485	-0.330003	-0.086486	-0.161976	-0.448639	-0.114713	-0.0934931	-0.108712	-0.251857	-0.106733	-0.169754	-0.0003752	-0.17699	-1.0575	-0.486752	-0.324387	0.0314411
250.3	-0.371995	0.082306	0.0958328	-0.297477	-0.199899	-0.0126989	-0.119103	-0.0527379	0.151436	-0.140323	-0.119001	-0.197817	-0.392909	-0.573391	-0.294188	-0.189683	0.115287	-0.11828	-0.301054	-0.107609	-0.306678	-1.19916	-0.51385	-0.372577	-0.15068	-0.0715496	-0.247608	-0.199385	-0.0154365	-0.462244	-0.022923	-0.360852	-0.03655	-0.348892	-0.0787124	-0.187739	-0.492531	-0.0536181	-0.125428	-0.115169	-0.267594	-0.128243	-0.200267	0.0129721	-0.153791	-0.973892	-0.513354	-0.326727	0.00259683
250.2	-0.367291	0.0805277	0.0795841	-0.284889	-0.213128	-0.0002974	-0.0830998	-0.0290413	0.165348	-0.161067	-0.0743656	-0.190083	-0.360839	-0.584427	-0.232443	-0.210734	0.13379	-0.132381	-0.282868	-0.0871976	-0.324192	-1.21212	-0.550547	-0.406259	-0.185792	-0.104718	-0.249684	-0.231435	-0.0421313	-0.461209	-0.0390324	-0.368293	-0.0484469	-0.389161	-0.0337307	-0.165732	-0.475833	0.0145422	-0.158604	-0.170863	-0.25496	-0.0599869	-0.154478	-0.0503235	-0.193362	-1.00443	-0.517607	-0.330155	0.0249025
250.1	-0.381685	0.0292403	0.0956427	-0.292636	-0.223706	-0.0030342	-0.0792102	-0.0406927	0.154697	-0.119598	-0.0540899	-0.13886	-0.427166	-0.562979	-0.20449	-0.251118	0.166201	-0.152947	-0.313911	-0.104882	-0.371172	-1.25976	-0.53547	-0.436129	-0.189078	-0.111216	-0.231643	-0.249028	-0.0516379	-0.452211	-0.0120281	-0.374557	-0.0203321	-0.367911	-0.0292069	-0.197884	-0.530711	0.0170685	-0.184277	-0.21565	-0.228981	-0.0740174	-0.210816	-0.0566061	-0.216638	-1.05844	-0.503598	-0.319875	0.0181649
250	-0.348399	0.0770927	0.117499	-0.335873	-0.249182	-0.02838	-0.109305	-0.0326244	0.119736	-0.129284	-0.098006	-0.159919	-0.377827	-0.638517	-0.251759	-0.228099	0.102225	-0.170925	-0.32718	-0.11554	-0.384923	-1.25716	-0.58002	-0.444985	-0.207386	-0.0897524	-0.18992	-0.263264	-0.0215494	-0.461551	-0.0461838	-0.375421	-0.0131301	-0.40226	-0.0949296	-0.244087	-0.550738	0.00610223	-0.189437	-0.189275	-0.2134	-0.0599919	-0.21771	-0.0775742	-0.244648	-1.12856	-0.479562	-0.288087	-0.000165
249.9	-0.390472	0.0831701	0.0805749	-0.412738	-0.29242	-0.0326159	-0.104012	-0.007389	0.128041	-0.098675	-0.0997409	-0.182378	-0.357248	-0.649224	-0.285069	-0.199362	0.0823884	-0.237671	-0.343604	-0.16638	-0.378278	-1.27952	-0.612169	-0.51091	-0.232326	-0.136747	-0.215275	-0.226997	-0.0366646	-0.455718	-0.0997632	-0.359976	-0.0358426	-0.396821	-0.110213	-0.277014	-0.595512	0.0407663	-0.0975437	-0.23294	-0.242994	-0.0317079	-0.20897	-0.0619281	-0.24651	-1.12081	-0.484113	-0.289888	0.0199515
249.8	-0.409124	0.061024	0.0609583	-0.363813	-0.292929	-0.0113422	-0.112739	-0.0059426	0.0947002	-0.10289	-0.0798325	-0.139601	-0.400484	-0.708408	-0.272544	-0.203346	0.12577	-0.270935	-0.347352	-0.185926	-0.36523	-1.29644	-0.602637	-0.488494	-0.243964	-0.132969	-0.191013	-0.218213	-0.0636751	-0.42558	-0.118698	-0.357241	-0.0342621	-0.397264	-0.121982	-0.238283	-0.616155	0.0473482	-0.132333	-0.216316	-0.241818	0.0190097	-0.202193	-0.0687877	-0.248282	-1.06976	-0.515723	-0.307621	-0.0172184
249.7	-0.408031	0.0880846	0.081899	-0.370845	-0.264945	-0.0391885	-0.127129	-0.0191323	0.0778147	-0.107992	-0.121134	-0.119482	-0.446032	-0.726543	-0.312579	-0.229931	0.131547	-0.282698	-0.358447	-0.183787	-0.355008	-1.28848	-0.597009	-0.517196	-0.205227	-0.15354	-0.211851	-0.218141	-0.0969928	-0.407243	-0.18349	-0.392414	-0.0088028	-0.324873	-0.176248	-0.16149	-0.554937	0.0195088	-0.140273	-0.248901	-0.207121	0.00353834	-0.17163	-0.0624075	-0.25235	-1.0782	-0.527932	-0.352858	-0.0012924
249.6	-0.38557	0.0888798	0.0685639	-0.345324	-0.245675	-0.06135	-0.164453	-0.0516085	0.014679	-0.0891324	-0.12543	-0.0813436	-0.447017	-0.717064	-0.280918	-0.22585	0.162693	-0.260124	-0.359824	-0.138115	-0.295036	-1.27136	-0.595779	-0.494461	-0.176697	-0.188886	-0.2278	-0.219215	-0.0804692	-0.361465	-0.176061	-0.380216	0.00931337	-0.284588	-0.131372	-0.0902538	-0.59797	0.0164035	-0.134423	-0.306895	-0.20312	0.025722	-0.18066	-0.0703078	-0.211743	-1.10741	-0.551499	-0.32333	-0.0076774
249.5	-0.411045	0.0189607	0.0753658	-0.337322	-0.267814	-0.104516	-0.160733	-0.0674002	0.00594234	-0.0308811	-0.0965093	-0.098678	-0.435373	-0.718028	-0.375538	-0.271752	0.164172	-0.272914	-0.378445	-0.110083	-0.33372	-1.23781	-0.610603	-0.538276	-0.179528	-0.215436	-0.247924	-0.239256	-0.0141605	-0.339573	-0.17169	-0.369862	-0.000266	-0.210481	-0.125218	-0.099332	-0.651803	0.0259818	-0.167003	-0.26252	-0.184086	-0.0070857	-0.188253	-0.108698	-0.241743	-1.10371	-0.560188	-0.282269	0.0225019
249.4	-0.41284	0.0101832	0.0954593	-0.293252	-0.295781	-0.111207	-0.159556	-0.0733806	-0.0206209	0.010471	-0.0663224	-0.059021	-0.400451	-0.713976	-0.31799	-0.305975	0.200106	-0.267035	-0.427756	-0.112956	-0.338236	-1.26811	-0.673869	-0.496277	-0.134403	-0.191466	-0.283567	-0.274958	-0.0288991	-0.345048	-0.211525	-0.37028	-0.046141	-0.187423	-0.145859	-0.0726004	-0.661936	0.00612208	-0.176258	-0.206118	-0.15475	-0.0856379	-0.209916	-0.133155	-0.240833	-1.08443	-0.589123	-0.228423	0.00533942
249.3	-0.421772	-0.0176371	0.0513023	-0.274133	-0.327759	-0.126312	-0.177658	-0.052131	-0.0314227	-0.0169568	-0.0418425	-0.0723236	-0.420427	-0.760585	-0.384613	-0.258355	0.152599	-0.283732	-0.350085	-0.147766	-0.314862	-1.3014	-0.713028	-0.508999	-0.146688	-0.235894	-0.274314	-0.229763	-0.0583997	-0.377144	-0.183377	-0.368736	-0.0828569	-0.19183	-0.135482	-0.0469374	-0.677323	-0.0509	-0.17817	-0.209005	-0.144839	-0.0443581	-0.164626	-0.124643	-0.213897	-1.06146	-0.573385	-0.222964	0.0180714
249.2	-0.375725	-0.0419573	0.0737074	-0.297476	-0.343383	-0.111057	-0.168097	-0.042255	-0.0652556	-0.0637151	-0.0212401	-0.137113	-0.418629	-0.762122	-0.343811	-0.296506	0.149303	-0.279999	-0.307119	-0.160589	-0.282885	-1.22171	-0.750924	-0.536616	-0.118661	-0.286257	-0.257769	-0.252702	-0.040056	-0.362703	-0.159218	-0.382796	-0.0633816	-0.211225	-0.124378	-0.068183	-0.708786	-0.0358521	-0.164668	-0.213026	-0.111909	-0.0528938	-0.179717	-0.164523	-0.223779	-1.04062	-0.540175	-0.226516	0.0219151
249.1	-0.378248	-0.0608001	0.0530066	-0.226308	-0.320113	-0.149085	-0.17108	-0.0368667	-0.0620026	-0.048837	-0.0142627	-0.0924141	-0.459219	-0.726598	-0.346844	-0.272693	0.151764	-0.270883	-0.345858	-0.145579	-0.327601	-1.22353	-0.730805	-0.515694	-0.131552	-0.279593	-0.319495	-0.24659	-0.0868975	-0.333795	-0.176487	-0.426046	-0.0735179	-0.237457	-0.157854	-0.0901218	-0.708782	-0.0730793	-0.153662	-0.201746	-0.111247	-0.0417926	-0.199421	-0.161337	-0.175332	-1.08732	-0.516699	-0.265749	-0.0048029
249	-0.338462	-0.0830936	0.0443052	-0.25412	-0.26849	-0.153227	-0.180727	-0.0115505	-0.0592708	-0.0786604	0.0274292	-0.0933877	-0.446248	-0.725739	-0.345769	-0.243214	0.146903	-0.254876	-0.290036	-0.0969142	-0.321185	-1.2429	-0.765253	-0.494689	-0.12502	-0.27973	-0.309345	-0.284653	-0.0747114	-0.369865	-0.140581	-0.409379	-0.0571407	-0.218154	-0.167357	-0.0753212	-0.752809	-0.1182	-0.138065	-0.238562	-0.128342	0.0260449	-0.240021	-0.146633	-0.148854	-1.10376	-0.548277	-0.187812	-0.018639
248.9	-0.285051	-0.0674775	0.0200542	-0.191508	-0.211453	-0.154962	-0.188972	-0.02781	-0.0888642	-0.126281	0.0229828	-0.132961	-0.422425	-0.744487	-0.398611	-0.244181	0.131822	-0.254973	-0.281944	-0.0897141	-0.334679	-1.2502	-0.794709	-0.481985	-0.148127	-0.274354	-0.255527	-0.230979	-0.113614	-0.284673	-0.123916	-0.395029	-0.0890785	-0.229254	-0.128348	-0.082154	-0.673517	-0.142553	-0.15015	-0.239079	-0.129998	0.0278945	-0.241047	-0.168502	-0.124866	-1.09962	-0.522988	-0.157624	-0.0115702
248.8	-0.286374	-0.005751	0.0401696	-0.188196	-0.187669	-0.18826	-0.239482	0.0110738	-0.0654125	-0.138998	0.023606	-0.131227	-0.477373	-0.738536	-0.391349	-0.249905	0.113898	-0.30792	-0.285001	-0.081741	-0.337628	-1.23157	-0.826681	-0.466026	-0.177317	-0.232687	-0.23657	-0.24968	-0.10552	-0.29445	-0.171287	-0.351177	-0.0386191	-0.18481	-0.180707	-0.102698	-0.609794	-0.156515	-0.166178	-0.192337	-0.134399	0.0524968	-0.257651	-0.148381	-0.124558	-1.15073	-0.557286	-0.166024	0.00211237
248.7	-0.236315	-0.0056554	0.0820046	-0.140476	-0.182354	-0.185422	-0.21056	0.0428974	-0.0811144	-0.167543	0.0417998	-0.107501	-0.509271	-0.74451	-0.412312	-0.257212	0.146409	-0.303252	-0.25927	-0.0498301	-0.34406	-1.24387	-0.789144	-0.475429	-0.165414	-0.182163	-0.207914	-0.257392	-0.146417	-0.318099	-0.20055	-0.391032	-0.0439873	-0.170377	-0.205943	-0.0814454	-0.622487	-0.161454	-0.13955	-0.15384	-0.152607	0.0149415	-0.225857	-0.15876	-0.0984147	-1.20868	-0.582211	-0.178159	0.0104152
248.6	-0.248657	-0.0154387	0.0905018	-0.191875	-0.205168	-0.192737	-0.239726	0.0777479	-0.0631185	-0.181356	0.0701419	-0.0756397	-0.569681	-0.750217	-0.502205	-0.261166	0.120524	-0.243442	-0.247691	-0.0081231	-0.354185	-1.26427	-0.797456	-0.468752	-0.13851	-0.199575	-0.221931	-0.280218	-0.161887	-0.337008	-0.203234	-0.451787	-0.0151238	-0.177667	-0.183974	-0.0569096	-0.656901	-0.205135	-0.159007	-0.103607	-0.183697	0.0139527	-0.213675	-0.187127	-0.0964212	-1.22631	-0.572536	-0.150227	-0.0060029
248.5	-0.214606	-0.0359182	0.0762803	-0.122723	-0.246995	-0.211502	-0.260308	0.0451959	0.00191321	-0.179964	0.0506156	-0.0733333	-0.600206	-0.716631	-0.494081	-0.254501	0.0967139	-0.226179	-0.226865	-0.004394	-0.289245	-1.28388	-0.809756	-0.408578	-0.186443	-0.189973	-0.214215	-0.258269	-0.200523	-0.330884	-0.249201	-0.453012	-0.0301379	-0.202446	-0.207872	-0.0482958	-0.640622	-0.217574	-0.181755	-0.13949	-0.155592	-0.0148142	-0.227568	-0.192723	-0.112693	-1.30753	-0.518796	-0.118902	0.0199541
248.4	-0.191928	-0.116204	0.0753181	-0.106301	-0.255336	-0.209505	-0.250209	0.0320419	0.00911754	-0.195679	0.0217656	-0.090185	-0.63275	-0.728594	-0.572436	-0.257866	0.142845	-0.221021	-0.204242	-0.0245026	-0.346837	-1.26008	-0.792308	-0.405548	-0.182637	-0.0967567	-0.216682	-0.25316	-0.194926	-0.334715	-0.244865	-0.452863	-0.0287573	-0.173605	-0.192198	-0.0461956	-0.674106	-0.168226	-0.13758	-0.153866	-0.109034	-0.0572153	-0.222312	-0.239711	-0.099164	-1.35582	-0.52862	-0.0827444	0.0406011
248.3	-0.165841	-0.113755	0.0822818	-0.170774	-0.276208	-0.22696	-0.245835	0.00305047	0.00978571	-0.218102	-0.0205397	-0.0311405	-0.622396	-0.719067	-0.570235	-0.238052	0.111271	-0.211892	-0.224413	-0.0291083	-0.34945	-1.25175	-0.768906	-0.414506	-0.209568	-0.144369	-0.220128	-0.255004	-0.225887	-0.293337	-0.269965	-0.458526	-0.0367268	-0.146266	-0.222165	-0.0454485	-0.720174	-0.159622	-0.180492	-0.124021	-0.124982	-0.0344733	-0.261862	-0.246608	-0.148708	-1.39043	-0.54844	-0.0871866	0.0806935
248.2	-0.159325	-0.0974676	0.0874151	-0.127618	-0.269754	-0.228816	-0.261452	0.00202288	-0.0217341	-0.234206	-0.0548748	-0.0001243	-0.633559	-0.738742	-0.620398	-0.230648	0.143126	-0.221557	-0.210338	0.0221296	-0.36911	-1.28292	-0.81078	-0.416878	-0.217614	-0.196068	-0.237868	-0.253965	-0.252167	-0.272573	-0.2908	-0.464798	-0.0542728	-0.144547	-0.225498	-0.0327272	-0.762695	-0.19034	-0.189075	-0.0959582	-0.106068	-0.0476118	-0.262712	-0.278158	-0.119964	-1.34229	-0.553128	-0.0824492	0.0341482
248.1	-0.186361	-0.113688	0.0164871	-0.142104	-0.255751	-0.204089	-0.265065	0.0210456	0.0103118	-0.191162	-0.0513486	0.00295677	-0.62337	-0.788277	-0.654612	-0.248215	0.217204	-0.291891	-0.192644	0.0203527	-0.394749	-1.24603	-0.851795	-0.38711	-0.200562	-0.166242	-0.247699	-0.288573	-0.23854	-0.25469	-0.222146	-0.434349	-0.0586766	-0.183225	-0.208322	0.00215736	-0.78108	-0.185461	-0.265794	-0.0906665	-0.106721	-0.0426808	-0.256251	-0.237279	-0.141476	-1.3463	-0.590151	-0.0508581	0.0260733
248	-0.188375	-0.13855	-0.011468	-0.149673	-0.254877	-0.197669	-0.27382	-0.0130743	-0.0295953	-0.192069	-0.0403076	0.00146091	-0.622233	-0.785576	-0.644043	-0.24932	0.191745	-0.263455	-0.172651	-0.0510069	-0.38792	-1.17207	-0.895268	-0.380735	-0.196123	-0.206275	-0.233379	-0.262009	-0.166141	-0.251811	-0.160826	-0.395874	-0.0061968	-0.206132	-0.1598	0.0409614	-0.789548	-0.166105	-0.285325	-0.124555	-0.0678875	-0.0044688	-0.243127	-0.251558	-0.128743	-1.3745	-0.546996	-0.130105	0.0189274
247.9	-0.172231	-0.115184	-0.021746	-0.164456	-0.249035	-0.24149	-0.308276	-0.0136195	-0.0577179	-0.195673	-0.09563	0.0036492	-0.647023	-0.794508	-0.61215	-0.283412	0.155901	-0.282128	-0.170899	-0.0172818	-0.372485	-1.20705	-0.933234	-0.424876	-0.244888	-0.219702	-0.24954	-0.268363	-0.208335	-0.199055	-0.13014	-0.382289	-0.0508404	-0.243697	-0.141067	0.0470015	-0.859642	-0.120552	-0.301636	-0.129827	-0.0287914	0.0248586	-0.263268	-0.292669	-0.14218	-1.37611	-0.587875	-0.186181	0.0408624
247.8	-0.158629	-0.102795	-0.0402825	-0.197824	-0.274917	-0.25899	-0.31743	-0.0583008	-0.115099	-0.185471	-0.127619	-0.0185245	-0.591068	-0.828244	-0.613963	-0.276781	0.139343	-0.256527	-0.135751	-0.040194	-0.308636	-1.1964	-0.953223	-0.422304	-0.206754	-0.237562	-0.251963	-0.25267	-0.196673	-0.174689	-0.15867	-0.394421	-0.0575253	-0.290899	-0.214063	-0.0186055	-0.930773	-0.131714	-0.311219	-0.153171	-0.0175971	-0.0338992	-0.264961	-0.274555	-0.144731	-1.40767	-0.585621	-0.197068	0.00215354
247.7	-0.152228	-0.053411	-0.0476228	-0.158227	-0.250466	-0.296327	-0.313039	-0.0802725	-0.0977571	-0.156005	-0.139397	-0.0579887	-0.61773	-0.797735	-0.64118	-0.284902	0.13183	-0.248803	-0.123622	0.00593517	-0.292353	-1.27499	-0.917241	-0.455568	-0.268668	-0.309575	-0.209666	-0.245643	-0.262554	-0.158488	-0.158837	-0.444727	-0.0358165	-0.309452	-0.213812	0.00264758	-0.940801	-0.128732	-0.266601	-0.154597	-0.054719	0.00648546	-0.251297	-0.245886	-0.130219	-1.41424	-0.610746	-0.203585	0.0287431
247.6	-0.172027	-0.0449983	-0.0644108	-0.172586	-0.237241	-0.279918	-0.322346	-0.0268872	-0.119999	-0.210584	-0.127708	-0.0752177	-0.639223	-0.819181	-0.638049	-0.298643	0.0865189	-0.287236	-0.105186	-0.0386013	-0.239755	-1.34596	-0.873884	-0.421148	-0.261108	-0.32948	-0.171733	-0.252117	-0.342711	-0.159244	-0.147005	-0.455347	-0.0892285	-0.307352	-0.247131	0.0190133	-1.0353	-0.12821	-0.272276	-0.131564	-0.0801918	-0.0038133	-0.260475	-0.243452	-0.120639	-1.38766	-0.606353	-0.178402	-0.0096494
247.5	-0.185611	-0.0599965	-0.0628152	-0.221826	-0.232356	-0.325992	-0.283106	-0.0383676	-0.168244	-0.22047	-0.100298	-0.0916943	-0.648615	-0.819063	-0.648824	-0.269442	0.0806054	-0.302488	-0.138453	0.00522288	-0.252686	-1.29905	-0.881576	-0.47611	-0.234786	-0.342526	-0.199248	-0.233421	-0.354697	-0.169864	-0.113121	-0.521271	-0.0926666	-0.348822	-0.269452	0.0159685	-1.0593	-0.127801	-0.266498	-0.127998	-0.0579555	0.0334235	-0.269334	-0.259734	-0.120872	-1.40185	-0.674132	-0.189658	-0.063511
247.4	-0.164551	-0.0831649	-0.0680726	-0.272758	-0.25566	-0.303206	-0.249953	-0.020496	-0.170449	-0.235413	-0.103872	-0.110178	-0.672057	-0.800679	-0.621265	-0.261435	0.0610016	-0.305989	-0.146068	-0.019318	-0.246919	-1.3014	-0.857345	-0.54975	-0.250807	-0.35325	-0.192194	-0.245944	-0.385744	-0.125907	-0.130028	-0.556449	-0.0827967	-0.338929	-0.29735	0.0442726	-1.05132	-0.168327	-0.259532	-0.137195	-0.107361	0.0642911	-0.245773	-0.261602	-0.160006	-1.44216	-0.690635	-0.171035	-0.0848168
247.3	-0.170401	-0.0915998	-0.0621224	-0.293967	-0.28659	-0.300581	-0.227804	-0.0089287	-0.181936	-0.203098	-0.0907071	-0.120891	-0.657865	-0.827079	-0.642464	-0.280773	-0.0068245	-0.320592	-0.197316	-0.0529893	-0.300474	-1.28819	-0.904241	-0.605905	-0.261169	-0.342664	-0.138978	-0.299617	-0.422268	-0.158146	-0.111306	-0.57639	-0.111345	-0.317521	-0.335366	-0.0392303	-1.007	-0.172826	-0.257789	-0.125091	-0.12786	0.0814467	-0.241736	-0.241299	-0.116774	-1.41627	-0.694623	-0.196437	-0.0928763
247.2	-0.126609	-0.0900342	-0.0703499	-0.336113	-0.306597	-0.351294	-0.212737	-0.0118484	-0.167452	-0.2639	-0.0978371	-0.125139	-0.669334	-0.785013	-0.641425	-0.308493	0.00202306	-0.289666	-0.214257	-0.0700691	-0.322601	-1.29286	-0.94289	-0.614445	-0.257096	-0.390782	-0.149423	-0.332276	-0.361469	-0.124224	-0.136721	-0.539191	-0.116992	-0.304309	-0.36388	-0.0511917	-1.01569	-0.15966	-0.287587	-0.132737	-0.115243	0.0983284	-0.216848	-0.287943	-0.155913	-1.47215	-0.680718	-0.208095	-0.0997675
247.1	-0.120833	-0.0610667	-0.088024	-0.351645	-0.314635	-0.35606	-0.220175	-0.0216153	-0.172853	-0.265169	-0.103502	-0.0972249	-0.645432	-0.792255	-0.649041	-0.289753	-0.0149668	-0.287727	-0.219821	-0.0765169	-0.308097	-1.3141	-0.99059	-0.636408	-0.231464	-0.372913	-0.12051	-0.317722	-0.401339	-0.152512	-0.15899	-0.562527	-0.111951	-0.308532	-0.336229	-0.0834006	-1.01546	-0.180319	-0.340274	-0.178953	-0.111516	0.0553878	-0.153451	-0.326254	-0.148232	-1.52856	-0.741025	-0.196276	-0.141826
247	-0.0640048	-0.0570609	-0.0583447	-0.327661	-0.258039	-0.393053	-0.232222	-0.0009209	-0.165525	-0.261938	-0.0995399	-0.0931553	-0.648169	-0.81069	-0.624016	-0.257488	-0.0597803	-0.315904	-0.234905	-0.104792	-0.280006	-1.26986	-1.07763	-0.664295	-0.195096	-0.379991	-0.155432	-0.277294	-0.449279	-0.0859667	-0.215276	-0.553187	-0.120766	-0.263637	-0.375939	-0.0698399	-1.01151	-0.250461	-0.354112	-0.231862	-0.109089	0.0958993	-0.126807	-0.331759	-0.136872	-1.52384	-0.780714	-0.227893	-0.118343
246.9	-0.0432316	-0.0721904	-0.0687682	-0.378156	-0.285229	-0.415679	-0.201393	-0.0525516	-0.175618	-0.25669	-0.1438	-0.0915536	-0.691014	-0.784822	-0.653332	-0.27201	-0.0573766	-0.285042	-0.232451	-0.116106	-0.284271	-1.25817	-1.11018	-0.682277	-0.17999	-0.376562	-0.185945	-0.246509	-0.406406	-0.101067	-0.220802	-0.529432	-0.141634	-0.298173	-0.366615	-0.105151	-1.00024	-0.331605	-0.355305	-0.239942	-0.065709	0.132085	-0.0730952	-0.332268	-0.116282	-1.60423	-0.816785	-0.309878	-0.115009
246.8	-0.0343542	-0.0682385	-0.0680326	-0.340912	-0.311384	-0.424053	-0.17814	-0.0553026	-0.17765	-0.253007	-0.122943	-0.130183	-0.677337	-0.807543	-0.683617	-0.247871	-0.036541	-0.285238	-0.237866	-0.108124	-0.237248	-1.32605	-1.12269	-0.687404	-0.154225	-0.39811	-0.163072	-0.249627	-0.442586	-0.0995775	-0.244017	-0.522325	-0.0891223	-0.270953	-0.428337	-0.0906865	-0.9278	-0.421124	-0.383742	-0.178523	-0.0911321	0.0798922	-0.084606	-0.291971	-0.0969047	-1.51308	-0.888565	-0.318165	-0.0836699
246.7	-0.0064841	-0.041591	-0.130577	-0.343901	-0.335341	-0.438388	-0.211363	-0.030446	-0.150426	-0.274283	-0.109338	-0.166085	-0.664356	-0.796747	-0.74761	-0.216066	-0.0441975	-0.271181	-0.20279	-0.126429	-0.236732	-1.30466	-1.09569	-0.723305	-0.185657	-0.459044	-0.15145	-0.176409	-0.453941	-0.0618975	-0.291905	-0.540411	-0.119145	-0.295862	-0.435161	-0.113304	-0.923624	-0.427985	-0.432759	-0.163156	-0.0952856	0.0533149	-0.0475357	-0.267819	-0.100899	-1.52195	-0.901693	-0.301166	-0.0876484
246.6	0.00783787	-0.0607708	-0.158347	-0.323437	-0.309974	-0.444741	-0.171993	-0.0690484	-0.138688	-0.305438	-0.0655299	-0.17511	-0.722638	-0.709589	-0.734393	-0.248577	-0.0385681	-0.254669	-0.211705	-0.167403	-0.242611	-1.30019	-1.06496	-0.736794	-0.154896	-0.448961	-0.169115	-0.127709	-0.488618	-0.0980498	-0.280975	-0.536759	-0.109895	-0.303861	-0.368404	-0.109781	-0.984405	-0.449279	-0.430636	-0.166929	-0.07254	0.0532128	-0.0698393	-0.296718	-0.111195	-1.5483	-0.904501	-0.356284	-0.0990065
246.5	0.0280846	-0.0197648	-0.131899	-0.257864	-0.280008	-0.441557	-0.166344	-0.081264	-0.153983	-0.273904	-0.0841094	-0.19385	-0.762759	-0.694068	-0.716768	-0.276786	-0.0740625	-0.206029	-0.206607	-0.179327	-0.26599	-1.33458	-1.08544	-0.756309	-0.129164	-0.480157	-0.176996	-0.133267	-0.485828	-0.0727995	-0.282139	-0.572642	-0.0730841	-0.283487	-0.367792	-0.114696	-0.984136	-0.445455	-0.485514	-0.104401	-0.014045	0.0408086	-0.115119	-0.329724	-0.109577	-1.59852	-0.913913	-0.413698	-0.0851665
246.4	0.0205819	0.0019237	-0.142026	-0.277407	-0.346165	-0.416164	-0.201929	-0.115622	-0.17603	-0.269527	-0.0532443	-0.228294	-0.757817	-0.693554	-0.737369	-0.255578	-0.10576	-0.196922	-0.217565	-0.150013	-0.295238	-1.32727	-1.07596	-0.827593	-0.170425	-0.483943	-0.194577	-0.150457	-0.474864	-0.0618681	-0.262842	-0.584014	-0.141339	-0.27726	-0.345434	-0.117056	-1.01512	-0.481423	-0.518295	-0.163319	-0.0040153	0.0665329	-0.110536	-0.333458	-0.0861698	-1.63474	-0.924343	-0.383557	-0.0726651
246.3	0.0374464	-0.009469	-0.13942	-0.333394	-0.349689	-0.340319	-0.193371	-0.0739009	-0.160749	-0.283798	-0.0527129	-0.262951	-0.766967	-0.692897	-0.715201	-0.221943	-0.113623	-0.217546	-0.203412	-0.172242	-0.335125	-1.35514	-1.08899	-0.880929	-0.189324	-0.461298	-0.175423	-0.141419	-0.47509	-0.138655	-0.23381	-0.592321	-0.171356	-0.33865	-0.364368	-0.199578	-1.03542	-0.551202	-0.552787	-0.129095	-0.0140594	0.101425	-0.0719352	-0.323258	-0.12042	-1.73751	-0.949902	-0.356308	-0.123284
246.2	0.0529331	-0.0699632	-0.119594	-0.32662	-0.340032	-0.314507	-0.148204	-0.0487158	-0.16218	-0.315531	-0.0455819	-0.283926	-0.744649	-0.706649	-0.723569	-0.239715	-0.0920354	-0.247976	-0.168474	-0.1849	-0.389513	-1.40951	-1.08856	-0.872615	-0.196619	-0.417589	-0.185666	-0.155177	-0.495602	-0.16326	-0.242396	-0.63039	-0.204836	-0.364591	-0.376692	-0.225276	-1.02877	-0.542079	-0.551251	-0.0992946	-0.0067941	0.124306	-0.1177	-0.350605	-0.114198	-1.78125	-0.944638	-0.360175	-0.0861195
246.1	0.0949515	-0.0873194	-0.133866	-0.313851	-0.372246	-0.355003	-0.18691	-0.066237	-0.162225	-0.334375	-0.0959785	-0.264077	-0.768685	-0.74208	-0.705085	-0.213559	-0.110316	-0.276587	-0.146805	-0.179013	-0.363602	-1.44016	-1.07933	-0.867238	-0.199568	-0.424149	-0.150041	-0.106128	-0.538054	-0.188972	-0.240058	-0.625942	-0.224762	-0.383005	-0.425221	-0.239339	-1.01238	-0.591683	-0.557108	-0.13995	-0.0132767	0.155713	-0.137715	-0.307679	-0.0472206	-1.79505	-0.960803	-0.38455	-0.137484
246	0.0537181	-0.101962	-0.134789	-0.329897	-0.394632	-0.391174	-0.208059	-0.0459578	-0.148865	-0.368464	-0.121666	-0.329839	-0.829529	-0.717916	-0.71387	-0.24498	-0.135786	-0.289142	-0.135391	-0.204129	-0.400145	-1.43424	-1.01947	-0.885834	-0.239092	-0.411624	-0.0846819	-0.087964	-0.501993	-0.207585	-0.260591	-0.637042	-0.199497	-0.455979	-0.437646	-0.223914	-1.0326	-0.634707	-0.612555	-0.207691	-0.0243205	0.197387	-0.166833	-0.316376	-0.0638925	-1.81783	-0.96021	-0.437312	-0.147175
245.9	0.0462175	-0.0487414	-0.12657	-0.34559	-0.395648	-0.39051	-0.185916	-0.0805239	-0.121626	-0.318172	-0.127329	-0.318395	-0.810918	-0.709451	-0.710327	-0.235853	-0.135618	-0.288411	-0.234065	-0.219287	-0.416097	-1.47141	-0.976689	-0.903413	-0.237574	-0.378314	-0.131692	-0.120016	-0.498898	-0.146785	-0.27349	-0.633152	-0.218194	-0.430376	-0.420414	-0.226805	-1.04802	-0.659193	-0.59822	-0.219495	0.00157386	0.124607	-0.209798	-0.27998	-0.0860744	-1.7954	-1.06068	-0.448457	-0.166241
245.8	-0.0046771	-0.0236469	-0.110402	-0.346159	-0.453256	-0.384828	-0.182099	-0.0761855	-0.13243	-0.261979	-0.146819	-0.274379	-0.783011	-0.685283	-0.746915	-0.244961	-0.19052	-0.272352	-0.238332	-0.217959	-0.435561	-1.49898	-0.932246	-0.904405	-0.249229	-0.330913	-0.156695	-0.138466	-0.517891	-0.1578	-0.29172	-0.607402	-0.239199	-0.430709	-0.44976	-0.24755	-1.07907	-0.716944	-0.654114	-0.237105	-0.0562511	0.147083	-0.231514	-0.302974	-0.0703523	-1.82497	-1.06464	-0.52187	-0.177962
245.7	0.00240378	0.00377678	-0.103408	-0.362616	-0.48424	-0.379535	-0.1553	-0.102774	-0.153544	-0.252814	-0.183422	-0.2873	-0.780499	-0.741903	-0.756	-0.231927	-0.137456	-0.242912	-0.27777	-0.247038	-0.428452	-1.47407	-0.991725	-0.948887	-0.264068	-0.344711	-0.169135	-0.109564	-0.541295	-0.147945	-0.327311	-0.563584	-0.224663	-0.440356	-0.444573	-0.23668	-1.0738	-0.721116	-0.704186	-0.264514	-0.0369635	0.13979	-0.163388	-0.266434	-0.0827352	-1.84647	-1.07411	-0.514531	-0.145347
245.6	-0.0458976	0.00707752	-0.0722707	-0.378269	-0.515093	-0.386383	-0.199539	-0.0364773	-0.185359	-0.236603	-0.209593	-0.257854	-0.80837	-0.778581	-0.766835	-0.26863	-0.152093	-0.207226	-0.293282	-0.233166	-0.445034	-1.53877	-1.01426	-0.937885	-0.284355	-0.38838	-0.206985	-0.115218	-0.565803	-0.128647	-0.310979	-0.544876	-0.239033	-0.424158	-0.461456	-0.239221	-1.09439	-0.681619	-0.731112	-0.247838	-0.0273468	0.119704	-0.194926	-0.307975	-0.10807	-1.8552	-1.11986	-0.51418	-0.130598
245.5	-0.0319256	-0.0201797	-0.0843939	-0.415895	-0.560802	-0.384918	-0.189721	-0.0665759	-0.195963	-0.238535	-0.17152	-0.275143	-0.834182	-0.796747	-0.77555	-0.275577	-0.172481	-0.222117	-0.268631	-0.230018	-0.424956	-1.54084	-1.01353	-0.976384	-0.265249	-0.441904	-0.284272	-0.16638	-0.550817	-0.156653	-0.247398	-0.579115	-0.221267	-0.382425	-0.482828	-0.22842	-1.17988	-0.716336	-0.748232	-0.268349	-0.0283087	0.131971	-0.185615	-0.348895	-0.166055	-1.86169	-1.18207	-0.520831	-0.142331
245.4	-0.0591853	-0.0282862	-0.119134	-0.446357	-0.585554	-0.379244	-0.194292	-0.089526	-0.187426	-0.231374	-0.206242	-0.308972	-0.802587	-0.730944	-0.78358	-0.300495	-0.164516	-0.212342	-0.286188	-0.27216	-0.491636	-1.57544	-1.06319	-0.990663	-0.253482	-0.449356	-0.300656	-0.160554	-0.6356	-0.151679	-0.200686	-0.594087	-0.259424	-0.404255	-0.462005	-0.241946	-1.21562	-0.729401	-0.741032	-0.304795	0.00600385	0.100028	-0.236619	-0.368718	-0.17882	-1.8525	-1.17777	-0.568932	-0.151566
245.3	-0.0026068	-0.0251788	-0.146264	-0.463177	-0.606048	-0.393622	-0.190025	-0.0841339	-0.237307	-0.233597	-0.202909	-0.27578	-0.752629	-0.743271	-0.783056	-0.309577	-0.170134	-0.240855	-0.291179	-0.288667	-0.495682	-1.5538	-1.11488	-1.04389	-0.273959	-0.427641	-0.337531	-0.138427	-0.609945	-0.145568	-0.209849	-0.524945	-0.25914	-0.402867	-0.468464	-0.246066	-1.243	-0.74708	-0.756711	-0.335796	0.04723	0.101467	-0.245247	-0.395761	-0.147083	-1.84358	-1.17807	-0.56067	-0.148615
245.2	-0.0372765	-0.0376305	-0.136498	-0.539782	-0.621256	-0.436407	-0.19621	-0.0123174	-0.26515	-0.212559	-0.208678	-0.300523	-0.75651	-0.775791	-0.780563	-0.292138	-0.197174	-0.291968	-0.320091	-0.28342	-0.521648	-1.58289	-1.18373	-1.11173	-0.253224	-0.46029	-0.372231	-0.158398	-0.59115	-0.135548	-0.250531	-0.539092	-0.228708	-0.411589	-0.442151	-0.251082	-1.27072	-0.803588	-0.728495	-0.30258	0.00721462	0.1443	-0.255199	-0.449836	-0.144098	-1.82228	-1.19712	-0.605083	-0.147995
245.1	-0.0403668	0.0133398	-0.120318	-0.564531	-0.62342	-0.441456	-0.186991	-0.0263462	-0.284255	-0.242701	-0.198369	-0.310144	-0.749096	-0.784582	-0.8114	-0.317414	-0.220009	-0.337885	-0.358869	-0.289689	-0.483835	-1.61487	-1.21151	-1.17458	-0.290161	-0.473704	-0.387456	-0.143117	-0.661107	-0.151673	-0.256674	-0.56476	-0.218478	-0.414368	-0.470428	-0.237575	-1.28669	-0.889208	-0.76668	-0.279047	0.0214987	0.189729	-0.215019	-0.447648	-0.150503	-1.86758	-1.20501	-0.591273	-0.101727
245	0.00695864	-0.0214694	-0.0923194	-0.553841	-0.592559	-0.449936	-0.264781	0.00415532	-0.297856	-0.21324	-0.195587	-0.27772	-0.735691	-0.844977	-0.760571	-0.32664	-0.23004	-0.337351	-0.386479	-0.278518	-0.48787	-1.63867	-1.29362	-1.22295	-0.281795	-0.427242	-0.341426	-0.178245	-0.672103	-0.133492	-0.227559	-0.607942	-0.186313	-0.446535	-0.473738	-0.250686	-1.25521	-0.911022	-0.750311	-0.26531	-0.0082033	0.20376	-0.151347	-0.431929	-0.158786	-1.89246	-1.18567	-0.589303	-0.137722
244.9	-0.0021984	-0.0307442	-0.103912	-0.598974	-0.556042	-0.438758	-0.253233	-0.0326243	-0.264537	-0.202194	-0.200812	-0.294288	-0.797354	-0.889373	-0.747141	-0.335213	-0.238244	-0.326391	-0.364198	-0.255923	-0.497808	-1.63797	-1.32211	-1.23501	-0.267189	-0.395942	-0.310971	-0.174949	-0.640325	-0.148548	-0.207545	-0.615119	-0.175408	-0.427271	-0.449736	-0.251403	-1.21554	-0.930104	-0.775979	-0.282302	0.0238704	0.193088	-0.131458	-0.41205	-0.22021	-1.97652	-1.24826	-0.587588	-0.138627
244.8	-0.02076	-0.0695996	-0.0350536	-0.609854	-0.573393	-0.456522	-0.269248	-0.0467548	-0.251238	-0.225152	-0.226529	-0.286697	-0.778492	-0.872489	-0.78391	-0.32951	-0.265058	-0.324539	-0.377723	-0.242146	-0.446869	-1.73689	-1.34364	-1.26887	-0.28648	-0.398272	-0.325665	-0.18859	-0.64113	-0.193405	-0.2542	-0.66343	-0.228503	-0.426142	-0.446047	-0.269095	-1.24565	-0.936782	-0.762562	-0.302391	0.0304968	0.177789	-0.162706	-0.370774	-0.217188	-1.99529	-1.21598	-0.65866	-0.119628
244.7	-0.0081437	-0.104068	0.00136161	-0.603271	-0.572291	-0.465277	-0.275419	-0.0683016	-0.236074	-0.256271	-0.240563	-0.272731	-0.82383	-0.880437	-0.751138	-0.379782	-0.231625	-0.331964	-0.378485	-0.279358	-0.453906	-1.8041	-1.3745	-1.23568	-0.288706	-0.344674	-0.359001	-0.148149	-0.73407	-0.158959	-0.302476	-0.725976	-0.276353	-0.471142	-0.484322	-0.265669	-1.22802	-0.948294	-0.770808	-0.269008	-0.0169062	0.114824	-0.207437	-0.36315	-0.203073	-2.03746	-1.28627	-0.626686	-0.100199
244.6	-0.0190042	-0.122414	-0.0070576	-0.637891	-0.581747	-0.513914	-0.258417	-0.0723998	-0.226429	-0.221056	-0.211584	-0.285603	-0.858285	-0.94446	-0.792345	-0.409124	-0.249569	-0.319848	-0.434905	-0.292826	-0.440397	-1.8021	-1.38363	-1.28222	-0.262525	-0.348287	-0.3683	-0.199199	-0.749133	-0.204259	-0.306579	-0.74125	-0.259156	-0.442202	-0.475142	-0.308857	-1.17119	-1.06181	-0.782562	-0.246436	-0.0423259	0.0760523	-0.169789	-0.357138	-0.173516	-2.05591	-1.27611	-0.670672	-0.072669
244.5	-0.0629643	-0.143837	-0.0416908	-0.680483	-0.586857	-0.542794	-0.25604	-0.0859266	-0.205781	-0.22081	-0.218579	-0.296286	-0.865977	-0.966169	-0.762465	-0.348821	-0.241177	-0.330751	-0.448717	-0.209916	-0.47489	-1.78673	-1.38907	-1.31554	-0.319888	-0.355312	-0.358682	-0.191935	-0.789209	-0.22583	-0.295578	-0.720135	-0.276646	-0.414683	-0.430609	-0.285078	-1.09103	-1.08468	-0.771005	-0.228049	-0.0666162	0.104208	-0.17118	-0.396749	-0.15714	-2.1074	-1.26645	-0.659111	-0.0433899
244.4	-0.0651464	-0.155794	-0.0646771	-0.734869	-0.609845	-0.574665	-0.264238	-0.110674	-0.216139	-0.251711	-0.217089	-0.24829	-0.937816	-0.984975	-0.76123	-0.370275	-0.24925	-0.337269	-0.469614	-0.236981	-0.460434	-1.74065	-1.42956	-1.32315	-0.268096	-0.275457	-0.343343	-0.172131	-0.812802	-0.238074	-0.273494	-0.691331	-0.276665	-0.44221	-0.393011	-0.321681	-1.07748	-1.09369	-0.848096	-0.256299	-0.0282958	0.15791	-0.237968	-0.370608	-0.173344	-2.10867	-1.26941	-0.70305	-0.042671
244.3	-0.0888749	-0.133833	-0.0689647	-0.766603	-0.605203	-0.547394	-0.226204	-0.174964	-0.221747	-0.241942	-0.226059	-0.227047	-0.957752	-0.995162	-0.792474	-0.296736	-0.242148	-0.301072	-0.476836	-0.219651	-0.510039	-1.73576	-1.46688	-1.3332	-0.290909	-0.25923	-0.334092	-0.113834	-0.781601	-0.21804	-0.323615	-0.66485	-0.232792	-0.385171	-0.412111	-0.339844	-1.0345	-1.08729	-0.797308	-0.259737	-0.0567165	0.17865	-0.221443	-0.382381	-0.147784	-2.15083	-1.29769	-0.718738	0.00255556
244.2	-0.0803147	-0.144595	-0.0485625	-0.784122	-0.681174	-0.519361	-0.278682	-0.158974	-0.226424	-0.222334	-0.282957	-0.254076	-0.963132	-1.01815	-0.795817	-0.29632	-0.25798	-0.316114	-0.522492	-0.223016	-0.515356	-1.78859	-1.4426	-1.33112	-0.281592	-0.241144	-0.315361	-0.141095	-0.831988	-0.204425	-0.357855	-0.66275	-0.195101	-0.355963	-0.375327	-0.305893	-1.07059	-1.11283	-0.838714	-0.272043	-0.0289484	0.151848	-0.250333	-0.346406	-0.148664	-2.22683	-1.31189	-0.713732	-0.009067
244.1	-0.116114	-0.15031	-0.0367324	-0.806931	-0.671106	-0.537518	-0.343368	-0.157861	-0.235964	-0.195746	-0.307684	-0.260195	-0.940444	-1.07736	-0.825472	-0.313646	-0.250048	-0.293994	-0.492446	-0.255309	-0.527521	-1.82983	-1.42363	-1.29374	-0.305777	-0.246433	-0.348404	-0.0981804	-0.831064	-0.233564	-0.37161	-0.638663	-0.179284	-0.38397	-0.373347	-0.326752	-1.13625	-1.10828	-0.824913	-0.278525	-0.0409242	0.113033	-0.265837	-0.311658	-0.102857	-2.26461	-1.35224	-0.729917	-0.0308951
244	-0.097425	-0.134468	0.00101563	-0.822953	-0.669072	-0.575349	-0.327955	-0.159499	-0.236407	-0.207594	-0.320255	-0.276513	-0.968627	-1.09207	-0.797985	-0.265258	-0.237601	-0.36083	-0.483707	-0.295527	-0.497866	-1.92172	-1.43503	-1.24225	-0.279016	-0.253589	-0.341718	-0.108851	-0.858613	-0.201547	-0.399568	-0.617271	-0.150575	-0.431338	-0.377302	-0.327511	-1.13158	-1.08774	-0.843729	-0.343505	-0.0154224	0.0603972	-0.298344	-0.330996	-0.129838	-2.31659	-1.39159	-0.74201	-0.0146369
243.9	-0.128722	-0.078988	-0.026911	-0.819782	-0.65018	-0.552804	-0.303731	-0.173743	-0.200458	-0.161333	-0.281801	-0.29595	-0.977104	-1.13244	-0.807066	-0.284711	-0.260272	-0.37001	-0.475987	-0.256269	-0.445597	-1.94593	-1.44182	-1.27003	-0.299266	-0.229245	-0.3129	-0.116286	-0.894391	-0.216892	-0.372164	-0.663592	-0.122107	-0.420807	-0.402735	-0.351009	-1.21155	-1.13875	-0.850573	-0.409131	-0.0366499	0.0102338	-0.354883	-0.303957	-0.180558	-2.31114	-1.39543	-0.735	0.00342209
243.8	-0.160856	-0.0953166	-0.0261212	-0.849	-0.662531	-0.573564	-0.332198	-0.188467	-0.162623	-0.129716	-0.282036	-0.306885	-0.962807	-1.13704	-0.829871	-0.312399	-0.225694	-0.411784	-0.493313	-0.287271	-0.454566	-2.00918	-1.47945	-1.29209	-0.303164	-0.188631	-0.303306	-0.113303	-0.911643	-0.214473	-0.324641	-0.669979	-0.157777	-0.436098	-0.500555	-0.323754	-1.2811	-1.17486	-0.831343	-0.387731	0.00815895	0.0263927	-0.401439	-0.302168	-0.186672	-2.33271	-1.38926	-0.75123	0.0536363
243.7	-0.232266	-0.114165	-0.0219573	-0.905558	-0.761627	-0.566837	-0.328015	-0.21024	-0.150944	-0.129584	-0.292937	-0.348411	-1.07423	-1.14901	-0.805134	-0.355794	-0.231799	-0.416227	-0.500369	-0.309219	-0.490485	-2.11568	-1.47827	-1.33472	-0.341002	-0.19128	-0.321972	-0.165305	-0.952064	-0.244335	-0.326564	-0.692007	-0.155114	-0.531938	-0.514658	-0.367685	-1.34736	-1.15069	-0.874282	-0.354831	0.0148212	0.0484645	-0.398089	-0.347171	-0.182095	-2.38716	-1.41316	-0.767714	0.0422329
243.6	-0.28991	-0.163779	-0.0491401	-0.953284	-0.782079	-0.581171	-0.388522	-0.220765	-0.134208	-0.0996606	-0.237866	-0.388689	-1.04773	-1.19182	-0.830204	-0.314949	-0.220258	-0.412774	-0.528559	-0.318895	-0.466884	-2.10198	-1.43968	-1.37743	-0.363876	-0.190426	-0.300223	-0.157433	-0.979453	-0.275029	-0.322945	-0.732007	-0.211194	-0.479209	-0.527528	-0.364651	-1.37285	-1.14734	-0.828433	-0.351604	0.0226881	0.0482051	-0.405376	-0.357433	-0.220864	-2.38856	-1.43903	-0.78302	0.012802
243.5	-0.342261	-0.153212	-0.0853116	-0.973416	-0.814217	-0.573035	-0.440448	-0.246081	-0.157407	-0.088371	-0.279704	-0.380206	-1.07909	-1.1774	-0.867922	-0.318317	-0.215242	-0.434797	-0.534155	-0.342743	-0.508124	-2.10079	-1.40765	-1.4119	-0.385602	-0.169852	-0.309851	-0.141958	-0.970221	-0.252924	-0.323276	-0.781542	-0.218281	-0.482173	-0.522423	-0.408259	-1.49944	-1.08465	-0.855978	-0.386879	-0.0130373	0.0557743	-0.423624	-0.448159	-0.247445	-2.45212	-1.43867	-0.775091	-0.0331551
243.4	-0.34418	-0.102356	-0.0908107	-1.00359	-0.831222	-0.597494	-0.474702	-0.233366	-0.130289	-0.121712	-0.273973	-0.362543	-1.13312	-1.18374	-0.819871	-0.335502	-0.260151	-0.422937	-0.574441	-0.313384	-0.525193	-2.2087	-1.53389	-1.40675	-0.36484	-0.131391	-0.315923	-0.184348	-0.972886	-0.237405	-0.282695	-0.787029	-0.180152	-0.49138	-0.517546	-0.425493	-1.50331	-1.14449	-0.879888	-0.39578	-0.0296224	0.0497676	-0.473302	-0.50319	-0.253764	-2.51166	-1.44073	-0.787597	-0.0233907
243.3	-0.380641	-0.127261	-0.102237	-1.07694	-0.796686	-0.666061	-0.465846	-0.253256	-0.161709	-0.128983	-0.306282	-0.336317	-1.04109	-1.25836	-0.890409	-0.333407	-0.249305	-0.415896	-0.584927	-0.308748	-0.515305	-2.22344	-1.51601	-1.41237	-0.387628	-0.130567	-0.30593	-0.256641	-0.940475	-0.223268	-0.31632	-0.831563	-0.180241	-0.474343	-0.490523	-0.476388	-1.52221	-1.13151	-0.886015	-0.39761	-0.0155499	0.0402222	-0.477596	-0.484177	-0.204337	-2.58696	-1.50214	-0.744581	-0.0114497
243.2	-0.380654	-0.205993	-0.11592	-1.0939	-0.820799	-0.722919	-0.469877	-0.220193	-0.168587	-0.166155	-0.336015	-0.293389	-1.11019	-1.2369	-0.979325	-0.3286	-0.225344	-0.393925	-0.606581	-0.305965	-0.500481	-2.25413	-1.52173	-1.38916	-0.401124	-0.0800925	-0.326739	-0.258496	-0.987736	-0.210105	-0.303121	-0.79976	-0.1979	-0.488825	-0.479588	-0.453951	-1.57612	-1.16053	-0.891881	-0.414463	-0.0072358	-0.0272776	-0.41867	-0.494941	-0.210355	-2.63844	-1.51432	-0.788706	-0.027698
243.1	-0.39293	-0.18716	-0.0558031	-1.12494	-0.826666	-0.801849	-0.473053	-0.198846	-0.189174	-0.192548	-0.399212	-0.271567	-1.13017	-1.29091	-1.00932	-0.304149	-0.213901	-0.364678	-0.638288	-0.318759	-0.505874	-2.33631	-1.56486	-1.39418	-0.370116	-0.0885414	-0.353837	-0.236259	-1.02368	-0.197259	-0.298484	-0.773162	-0.18433	-0.518968	-0.481063	-0.502224	-1.64418	-1.17375	-0.849403	-0.437112	-0.0183392	-0.163996	-0.512344	-0.525437	-0.189949	-2.68093	-1.54773	-0.7476	-0.0127868
243	-0.372637	-0.212323	-0.0992935	-1.13012	-0.865148	-0.910141	-0.487076	-0.238904	-0.186488	-0.181909	-0.425863	-0.279402	-1.11582	-1.31728	-1.01194	-0.295127	-0.22863	-0.364477	-0.631978	-0.313323	-0.474744	-2.34346	-1.59335	-1.47513	-0.379317	-0.0681816	-0.38565	-0.230928	-1.05262	-0.177789	-0.337422	-0.791722	-0.200237	-0.51686	-0.449037	-0.498686	-1.65981	-1.18755	-0.872463	-0.438826	-0.0229738	-0.185159	-0.563813	-0.517884	-0.230911	-2.68144	-1.58494	-0.808048	-0.0066605
242.9	-0.40265	-0.164041	-0.0966439	-1.18288	-0.863729	-0.913044	-0.502172	-0.236808	-0.191165	-0.176627	-0.458982	-0.306436	-1.11132	-1.32633	-1.05141	-0.267075	-0.2262	-0.353794	-0.624045	-0.302106	-0.44547	-2.34878	-1.57443	-1.52178	-0.419795	-0.119177	-0.391095	-0.225853	-1.06338	-0.13945	-0.346897	-0.824761	-0.183583	-0.570718	-0.493847	-0.480668	-1.69408	-1.218	-0.902818	-0.444387	-0.0558429	-0.213992	-0.584211	-0.483977	-0.265548	-2.73789	-1.56308	-0.844034	-0.0184538
242.8	-0.391953	-0.179716	-0.11693	-1.2189	-0.879539	-0.896204	-0.473941	-0.243499	-0.139929	-0.194006	-0.459285	-0.30369	-1.12959	-1.31372	-1.03333	-0.293053	-0.274654	-0.357473	-0.632375	-0.373914	-0.422037	-2.32625	-1.62789	-1.5738	-0.408208	-0.150438	-0.410096	-0.267744	-1.07092	-0.163328	-0.357485	-0.842736	-0.15202	-0.574661	-0.477876	-0.509017	-1.7323	-1.2686	-0.881082	-0.433524	-0.0468636	-0.238846	-0.574024	-0.546026	-0.325825	-2.82145	-1.62794	-0.863539	0.00071695
242.7	-0.318538	-0.146572	-0.163993	-1.31005	-0.86757	-0.883616	-0.471769	-0.322414	-0.174184	-0.19129	-0.484055	-0.257778	-1.19199	-1.34259	-1.08931	-0.284296	-0.288247	-0.317909	-0.600563	-0.385731	-0.422289	-2.35688	-1.75266	-1.62874	-0.434227	-0.148095	-0.417966	-0.305353	-1.15654	-0.175905	-0.396616	-0.864647	-0.160398	-0.515838	-0.465569	-0.561878	-1.76443	-1.25898	-0.890213	-0.423551	-0.0249058	-0.226245	-0.585303	-0.54686	-0.312527	-2.88568	-1.62654	-0.833109	-0.0057186
242.6	-0.297638	-0.145364	-0.166234	-1.34787	-0.903346	-0.913032	-0.449999	-0.363191	-0.182815	-0.218549	-0.465743	-0.27017	-1.28897	-1.36383	-1.1359	-0.296326	-0.24842	-0.356718	-0.595292	-0.408794	-0.420822	-2.37415	-1.86351	-1.61472	-0.390644	-0.116777	-0.376982	-0.32745	-1.19465	-0.193407	-0.34772	-0.875817	-0.103454	-0.536799	-0.483225	-0.556958	-1.76968	-1.2487	-0.902406	-0.414722	-0.0601543	-0.16902	-0.570887	-0.546004	-0.306022	-2.95043	-1.66066	-0.871562	0.00084676
242.5	-0.277874	-0.184782	-0.163671	-1.36185	-0.857894	-0.932456	-0.481773	-0.389611	-0.156932	-0.215161	-0.447609	-0.283895	-1.3257	-1.43917	-1.11164	-0.255453	-0.21757	-0.374699	-0.582843	-0.399372	-0.428136	-2.41635	-1.98145	-1.64292	-0.372926	-0.0989922	-0.318122	-0.331582	-1.21573	-0.18764	-0.320516	-0.889642	-0.0947398	-0.518869	-0.470885	-0.557861	-1.8018	-1.24418	-0.859735	-0.425233	-0.0337781	-0.204635	-0.503559	-0.539657	-0.331432	-3.00448	-1.67712	-0.800071	-0.0312024
242.4	-0.23643	-0.230597	-0.199819	-1.39948	-0.891764	-0.987312	-0.474963	-0.401686	-0.136043	-0.285845	-0.444901	-0.3022	-1.32607	-1.45213	-1.17733	-0.292036	-0.24864	-0.395256	-0.531529	-0.373584	-0.4109	-2.45729	-1.9787	-1.71341	-0.350471	-0.124343	-0.247368	-0.298469	-1.24031	-0.192356	-0.288771	-0.921022	-0.102899	-0.47433	-0.459086	-0.604932	-1.8602	-1.28274	-0.863361	-0.399863	-0.0848235	-0.220326	-0.561671	-0.525471	-0.381074	-3.05722	-1.7228	-0.842295	-0.0600557
242.3	-0.287079	-0.264308	-0.252208	-1.43385	-0.906062	-0.982992	-0.484562	-0.418389	-0.0548657	-0.220769	-0.467971	-0.32756	-1.37753	-1.38733	-1.18018	-0.245057	-0.253845	-0.406356	-0.525843	-0.445455	-0.383386	-2.49722	-2.01158	-1.7894	-0.314215	-0.103121	-0.234334	-0.274618	-1.30993	-0.223607	-0.335123	-1.03161	-0.088601	-0.543351	-0.464112	-0.623557	-1.89823	-1.30736	-0.845387	-0.439343	-0.164938	-0.209195	-0.596011	-0.494747	-0.366707	-3.09889	-1.71843	-0.877718	-0.0810718
242.2	-0.298815	-0.239367	-0.226161	-1.48529	-0.903632	-0.999166	-0.479525	-0.41626	-0.0645684	-0.188089	-0.495599	-0.341798	-1.35523	-1.43765	-1.17936	-0.204009	-0.268091	-0.422119	-0.50053	-0.474039	-0.396765	-2.55609	-2.07075	-1.82938	-0.320752	-0.0630083	-0.227446	-0.253568	-1.3113	-0.265915	-0.356972	-1.04584	-0.070637	-0.597761	-0.465685	-0.666271	-1.95546	-1.33049	-0.837804	-0.420555	-0.207161	-0.214362	-0.596131	-0.482838	-0.328842	-3.13061	-1.74531	-0.877333	-0.0937498
242.1	-0.346135	-0.263863	-0.200268	-1.55009	-0.910549	-0.991644	-0.510593	-0.405671	-0.0517091	-0.190316	-0.470569	-0.329896	-1.43373	-1.49885	-1.17877	-0.206361	-0.257642	-0.44419	-0.555825	-0.468673	-0.42035	-2.57821	-2.07495	-1.87877	-0.317454	-0.0684128	-0.281053	-0.246301	-1.34008	-0.224399	-0.397527	-1.0482	-0.039072	-0.580759	-0.406973	-0.635879	-1.98835	-1.34406	-0.868162	-0.423768	-0.219521	-0.255547	-0.615091	-0.475192	-0.333029	-3.1517	-1.78456	-0.872446	-0.0724508
242	-0.349443	-0.285772	-0.166408	-1.59734	-0.919346	-0.977496	-0.49612	-0.455582	-0.0435926	-0.233203	-0.461901	-0.369181	-1.4947	-1.53872	-1.18759	-0.213463	-0.248282	-0.468956	-0.570624	-0.440879	-0.426063	-2.69922	-2.06711	-1.90672	-0.317225	-0.0779123	-0.280972	-0.288103	-1.39263	-0.22642	-0.370931	-1.10371	-0.0340647	-0.602799	-0.479597	-0.628404	-2.04873	-1.36828	-0.860659	-0.414157	-0.227439	-0.224388	-0.665887	-0.437816	-0.347824	-3.23622	-1.88484	-0.916187	-0.0936861
241.9	-0.36908	-0.285571	-0.153783	-1.58906	-0.927693	-1.00577	-0.513675	-0.541745	-0.0142933	-0.251764	-0.472024	-0.348473	-1.50844	-1.55523	-1.20149	-0.220978	-0.241777	-0.45933	-0.587288	-0.469745	-0.426202	-2.70046	-2.11143	-1.87213	-0.337677	-0.0636746	-0.255019	-0.351258	-1.3747	-0.197437	-0.319867	-1.11769	-0.0438206	-0.606222	-0.461466	-0.666068	-2.08582	-1.35563	-0.886631	-0.400323	-0.201314	-0.220739	-0.677347	-0.400703	-0.364219	-3.32824	-1.92508	-0.949303	-0.138178
241.8	-0.418209	-0.306246	-0.18702	-1.64745	-0.959945	-0.988641	-0.494759	-0.560109	-0.0163632	-0.247912	-0.429752	-0.34203	-1.56648	-1.63655	-1.27019	-0.188154	-0.227619	-0.449749	-0.592311	-0.47878	-0.408337	-2.74926	-2.19326	-1.94301	-0.329284	-0.139882	-0.272093	-0.358552	-1.3965	-0.211524	-0.290674	-1.14029	-0.0579771	-0.636739	-0.427239	-0.67553	-2.12343	-1.34801	-1.00076	-0.448242	-0.195821	-0.24855	-0.768696	-0.399067	-0.363437	-3.31468	-2.00365	-1.01916	-0.155345
241.7	-0.36705	-0.326796	-0.180501	-1.65456	-1.01361	-1.05118	-0.444617	-0.535505	-0.0017833	-0.263026	-0.435392	-0.319826	-1.63398	-1.60378	-1.32019	-0.188598	-0.225682	-0.462121	-0.626803	-0.518109	-0.445033	-2.82334	-2.23888	-1.95206	-0.322304	-0.15941	-0.387162	-0.35626	-1.38573	-0.274531	-0.3339	-1.14058	-0.0386921	-0.647705	-0.404312	-0.689587	-2.19377	-1.38344	-1.01282	-0.461532	-0.211778	-0.285599	-0.803637	-0.410022	-0.371962	-3.3525	-2.05773	-1.06213	-0.170595
241.6	-0.353663	-0.317727	-0.219222	-1.63554	-1.09723	-1.08619	-0.42824	-0.52976	-0.0040147	-0.291969	-0.419402	-0.337064	-1.62174	-1.65071	-1.41371	-0.201019	-0.242934	-0.445523	-0.66353	-0.542998	-0.440545	-2.86272	-2.27241	-2.01072	-0.310559	-0.167745	-0.406898	-0.398267	-1.39033	-0.236697	-0.330135	-1.20159	0.0105097	-0.719409	-0.416125	-0.768347	-2.24516	-1.36484	-1.01323	-0.445936	-0.272537	-0.245222	-0.853056	-0.50127	-0.380777	-3.4011	-2.08642	-1.12928	-0.174544
241.5	-0.380631	-0.325953	-0.255057	-1.72958	-1.14338	-1.12753	-0.409962	-0.515903	-0.0480617	-0.254475	-0.404721	-0.395048	-1.6426	-1.63206	-1.46184	-0.187157	-0.242743	-0.449791	-0.653263	-0.483259	-0.461847	-2.93092	-2.30319	-2.10059	-0.320937	-0.189758	-0.391426	-0.402074	-1.43029	-0.209056	-0.291613	-1.20046	-0.0177464	-0.688	-0.46522	-0.828481	-2.29183	-1.34985	-0.971783	-0.450632	-0.301449	-0.21303	-0.833191	-0.529757	-0.4217	-3.53488	-2.1142	-1.15093	-0.173606
241.4	-0.336556	-0.285591	-0.260976	-1.68262	-1.18967	-1.15695	-0.42232	-0.522414	-0.0443232	-0.298665	-0.40519	-0.422825	-1.68298	-1.62148	-1.53351	-0.14872	-0.257077	-0.477214	-0.602669	-0.501895	-0.42613	-2.98107	-2.35425	-2.12089	-0.312509	-0.212998	-0.320425	-0.467324	-1.42555	-0.213543	-0.32488	-1.26918	0.0117666	-0.672648	-0.493676	-0.849043	-2.38002	-1.35222	-0.977291	-0.429308	-0.283578	-0.204779	-0.803496	-0.58994	-0.443372	-3.60896	-2.17212	-1.13433	-0.204551
241.3	-0.345276	-0.313394	-0.263801	-1.71366	-1.22176	-1.12889	-0.415789	-0.531985	-0.0459636	-0.31717	-0.405799	-0.443019	-1.74173	-1.63573	-1.58696	-0.198988	-0.286272	-0.510041	-0.55511	-0.529333	-0.437174	-3.01667	-2.40432	-2.09858	-0.299654	-0.239117	-0.336356	-0.45129	-1.46619	-0.237589	-0.368903	-1.32152	0.0213514	-0.717401	-0.467533	-0.876534	-2.40898	-1.37792	-0.97149	-0.454929	-0.260818	-0.221063	-0.822882	-0.54249	-0.45927	-3.64581	-2.19753	-1.11485	-0.228208
241.2	-0.34958	-0.285272	-0.231639	-1.71736	-1.24808	-1.16749	-0.385999	-0.496558	-0.0061326	-0.35806	-0.432373	-0.442274	-1.75931	-1.65666	-1.59099	-0.156185	-0.305779	-0.512165	-0.562208	-0.558477	-0.419115	-3.12506	-2.48024	-2.10141	-0.345928	-0.252618	-0.365464	-0.487157	-1.44262	-0.209689	-0.373912	-1.34686	0.0166584	-0.702209	-0.454403	-0.872429	-2.43066	-1.42217	-1.02862	-0.444676	-0.294453	-0.294016	-0.80607	-0.535681	-0.499245	-3.69582	-2.28963	-1.11239	-0.210235
241.1	-0.345651	-0.327276	-0.249577	-1.79821	-1.31169	-1.17699	-0.436217	-0.479367	-0.0370489	-0.363467	-0.486916	-0.468327	-1.81427	-1.71474	-1.61757	-0.21941	-0.285003	-0.471075	-0.579451	-0.632802	-0.375805	-3.20175	-2.53278	-2.18856	-0.353945	-0.221016	-0.376387	-0.508403	-1.47581	-0.220349	-0.408406	-1.44509	0.0129725	-0.760578	-0.409517	-0.95594	-2.50802	-1.43682	-1.06388	-0.489567	-0.281112	-0.293105	-0.807393	-0.61313	-0.529856	-3.83942	-2.32468	-1.17961	-0.187512
241	-0.348931	-0.394727	-0.224576	-1.79707	-1.27693	-1.18802	-0.416429	-0.477935	0.0131794	-0.352537	-0.441541	-0.437698	-1.86189	-1.72621	-1.65211	-0.249317	-0.284431	-0.446156	-0.519085	-0.657335	-0.40661	-3.25957	-2.62963	-2.25338	-0.401851	-0.252813	-0.403388	-0.516276	-1.43798	-0.233165	-0.422399	-1.48484	-0.0213476	-0.754587	-0.447863	-0.9865	-2.52388	-1.46614	-1.04745	-0.525084	-0.292516	-0.345727	-0.831076	-0.610164	-0.554568	-3.85434	-2.36603	-1.20201	-0.208869
240.9	-0.368802	-0.376381	-0.224961	-1.8609	-1.29504	-1.27909	-0.425894	-0.530825	0.041857	-0.399781	-0.446692	-0.432044	-1.83764	-1.77777	-1.69755	-0.228828	-0.284834	-0.425438	-0.530449	-0.632763	-0.380464	-3.25757	-2.72039	-2.30707	-0.396533	-0.289537	-0.416352	-0.556436	-1.44025	-0.22485	-0.414485	-1.51327	-0.0224995	-0.822496	-0.480604	-1.01074	-2.53708	-1.50525	-1.07843	-0.537654	-0.276694	-0.385163	-0.844069	-0.638671	-0.600268	-3.91035	-2.3815	-1.27202	-0.152443
240.8	-0.406742	-0.457189	-0.272649	-1.88645	-1.35643	-1.31132	-0.434021	-0.553588	0.0673422	-0.415114	-0.463049	-0.491274	-1.81262	-1.83022	-1.76651	-0.223231	-0.280346	-0.388539	-0.54775	-0.607552	-0.452552	-3.24918	-2.79552	-2.40431	-0.460136	-0.290627	-0.458457	-0.595642	-1.44883	-0.225801	-0.398707	-1.57764	-0.0066979	-0.872778	-0.497077	-1.00634	-2.64653	-1.53716	-1.1182	-0.483959	-0.281245	-0.387424	-0.825258	-0.662361	-0.608405	-3.98953	-2.45809	-1.23321	-0.132758
240.7	-0.394601	-0.537589	-0.323705	-1.91112	-1.3869	-1.35171	-0.444441	-0.54238	0.040437	-0.459157	-0.490329	-0.4709	-1.89573	-1.82554	-1.78943	-0.191057	-0.2585	-0.3888	-0.51779	-0.618158	-0.480954	-3.29743	-2.81309	-2.44961	-0.455681	-0.292338	-0.485522	-0.557504	-1.45416	-0.1837	-0.44853	-1.57998	-0.0339026	-0.884812	-0.49184	-1.03974	-2.66177	-1.56411	-1.14946	-0.425794	-0.26764	-0.334339	-0.867654	-0.727571	-0.561436	-4.04911	-2.53987	-1.27219	-0.141805
240.6	-0.413	-0.565258	-0.309686	-1.94032	-1.45971	-1.35124	-0.424897	-0.512353	0.00931225	-0.471947	-0.536191	-0.508884	-1.94781	-1.89258	-1.84228	-0.196656	-0.244458	-0.340224	-0.496418	-0.578411	-0.506138	-3.34031	-2.80484	-2.48929	-0.461809	-0.342107	-0.535314	-0.563659	-1.4324	-0.136817	-0.4682	-1.60536	-0.0412245	-0.872727	-0.438837	-1.05333	-2.70042	-1.58046	-1.20944	-0.425303	-0.31013	-0.367449	-0.884571	-0.695328	-0.621347	-4.10352	-2.58777	-1.30365	-0.173306
240.5	-0.400515	-0.576887	-0.307856	-1.99997	-1.47059	-1.38851	-0.389836	-0.510428	-0.0219831	-0.48568	-0.572643	-0.505831	-1.98933	-1.95767	-1.87781	-0.15616	-0.21078	-0.344189	-0.481379	-0.609432	-0.511176	-3.34383	-2.84815	-2.49181	-0.509202	-0.385811	-0.543765	-0.544663	-1.44787	-0.120886	-0.470768	-1.6424	-0.0948245	-0.858759	-0.407742	-1.0852	-2.71652	-1.64961	-1.22274	-0.436656	-0.304272	-0.39241	-0.89291	-0.665385	-0.619756	-4.15237	-2.648	-1.3031	-0.222355
240.4	-0.353132	-0.586887	-0.277357	-1.9939	-1.45421	-1.41184	-0.42613	-0.422643	-0.0415518	-0.505086	-0.624265	-0.496757	-2.04909	-2.00249	-1.87857	-0.209193	-0.226245	-0.377307	-0.431306	-0.615085	-0.526833	-3.42678	-2.95626	-2.60549	-0.485563	-0.421032	-0.510118	-0.573083	-1.48641	-0.0486855	-0.501151	-1.63788	-0.0709078	-0.906303	-0.425201	-1.11572	-2.7985	-1.69174	-1.24815	-0.433485	-0.368833	-0.454652	-0.895196	-0.629038	-0.620942	-4.23792	-2.66322	-1.26982	-0.219137
240.3	-0.360639	-0.632517	-0.293376	-2.03306	-1.48847	-1.47213	-0.374397	-0.40019	-0.0810061	-0.514561	-0.628057	-0.490151	-2.04185	-2.05163	-1.91452	-0.234105	-0.247697	-0.384177	-0.413579	-0.657543	-0.516029	-3.41516	-3.10499	-2.66316	-0.466415	-0.415874	-0.523861	-0.607003	-1.47057	-0.0506963	-0.508136	-1.66595	-0.0971635	-0.882341	-0.4548	-1.11756	-2.83729	-1.72903	-1.23356	-0.439917	-0.353799	-0.491294	-0.883192	-0.624956	-0.64068	-4.35141	-2.71983	-1.29244	-0.186646
240.2	-0.322437	-0.684964	-0.238893	-2.1048	-1.51737	-1.48356	-0.356168	-0.369854	-0.136188	-0.486785	-0.597752	-0.522427	-2.06908	-2.11644	-2.02717	-0.211863	-0.223517	-0.375893	-0.394848	-0.648619	-0.489856	-3.41716	-3.09875	-2.76159	-0.484061	-0.446216	-0.531586	-0.617828	-1.51639	-0.0618921	-0.547392	-1.69462	-0.127668	-0.943706	-0.493179	-1.1266	-2.87814	-1.69472	-1.29209	-0.374613	-0.332534	-0.482669	-0.870565	-0.576759	-0.671763	-4.43915	-2.73	-1.34463	-0.174705
240.1	-0.370962	-0.660489	-0.229241	-2.13962	-1.57324	-1.42599	-0.339015	-0.352673	-0.12159	-0.483064	-0.596061	-0.5436	-2.11025	-2.1545	-2.04898	-0.180374	-0.205199	-0.413629	-0.461424	-0.660966	-0.545465	-3.51598	-3.23456	-2.79911	-0.500405	-0.45783	-0.50711	-0.582955	-1.57898	-0.0654438	-0.553336	-1.76386	-0.129245	-0.94177	-0.58904	-1.12095	-2.94509	-1.76455	-1.33189	-0.36006	-0.327975	-0.477969	-0.859118	-0.57581	-0.724048	-4.48421	-2.77352	-1.43048	-0.208201
240	-0.384106	-0.640315	-0.314902	-2.18954	-1.64059	-1.43838	-0.361469	-0.390559	-0.104111	-0.492552	-0.554874	-0.601835	-2.14755	-2.29433	-2.05102	-0.207316	-0.197478	-0.428524	-0.425568	-0.679315	-0.558121	-3.57346	-3.3007	-2.88306	-0.488308	-0.475324	-0.492576	-0.567475	-1.57156	-0.0730119	-0.569941	-1.81627	-0.117324	-0.912198	-0.623371	-1.11927	-2.97305	-1.85438	-1.34806	-0.406473	-0.357411	-0.44306	-0.910328	-0.563499	-0.726428	-4.59186	-2.78501	-1.42862	-0.176766
239.9	-0.39138	-0.682058	-0.350412	-2.26582	-1.71113	-1.45943	-0.352715	-0.40242	-0.0675735	-0.508792	-0.568412	-0.635508	-2.16135	-2.33198	-2.07551	-0.187556	-0.174753	-0.423164	-0.360404	-0.730639	-0.595686	-3.60942	-3.36639	-2.89322	-0.491402	-0.453139	-0.49976	-0.590156	-1.60294	-0.128625	-0.58797	-1.87034	-0.087821	-0.90629	-0.634401	-1.1252	-3.00284	-1.86201	-1.39927	-0.333996	-0.373371	-0.376158	-0.890755	-0.578934	-0.756748	-4.68272	-2.83349	-1.49249	-0.221729
239.8	-0.420704	-0.698903	-0.35247	-2.35213	-1.74849	-1.48986	-0.344297	-0.456951	-0.0365791	-0.454618	-0.531492	-0.700072	-2.21336	-2.28555	-2.19598	-0.215418	-0.191111	-0.431225	-0.364825	-0.716181	-0.655831	-3.76047	-3.41823	-2.92736	-0.52925	-0.501208	-0.497196	-0.600804	-1.63033	-0.148468	-0.613254	-1.88747	-0.105537	-0.895569	-0.60212	-1.15206	-3.09323	-1.9116	-1.41268	-0.366575	-0.373573	-0.389936	-0.896604	-0.615505	-0.722715	-4.73519	-2.93993	-1.53117	-0.201513
239.7	-0.415067	-0.742321	-0.377344	-2.3537	-1.82821	-1.52275	-0.376232	-0.421652	-0.0311034	-0.456053	-0.500409	-0.691077	-2.29594	-2.36355	-2.25483	-0.23053	-0.188744	-0.43848	-0.417724	-0.713757	-0.693423	-3.81393	-3.54246	-2.97723	-0.567957	-0.473631	-0.478737	-0.613618	-1.65203	-0.15153	-0.654745	-1.90007	-0.140289	-0.897235	-0.579572	-1.1759	-3.18656	-1.95602	-1.45583	-0.420895	-0.376996	-0.411517	-0.926199	-0.634574	-0.777047	-4.75501	-3.04592	-1.54376	-0.208105
239.6	-0.445479	-0.732923	-0.379919	-2.41196	-1.83778	-1.53317	-0.372116	-0.392812	-0.080036	-0.485464	-0.494523	-0.702077	-2.32387	-2.42639	-2.29444	-0.224632	-0.143618	-0.440179	-0.436148	-0.726195	-0.767459	-3.91821	-3.57182	-3.00812	-0.59998	-0.512788	-0.500754	-0.595622	-1.68556	-0.137279	-0.621613	-1.97786	-0.137495	-0.920395	-0.595313	-1.15358	-3.23246	-1.9796	-1.48328	-0.388986	-0.40012	-0.383748	-0.931725	-0.618871	-0.797911	-4.84925	-3.12256	-1.5604	-0.235828
239.5	-0.515088	-0.769132	-0.317601	-2.41525	-1.90523	-1.55402	-0.347492	-0.388946	-0.0858136	-0.514626	-0.485542	-0.707712	-2.32448	-2.47154	-2.30183	-0.219609	-0.128324	-0.434524	-0.464994	-0.75613	-0.761953	-3.97891	-3.56734	-3.02547	-0.542092	-0.542488	-0.553191	-0.607418	-1.70012	-0.125232	-0.605906	-2.01572	-0.13986	-0.944674	-0.616167	-1.16303	-3.27885	-2.00998	-1.4559	-0.364433	-0.399341	-0.418652	-0.938748	-0.573089	-0.843854	-4.92603	-3.20747	-1.58448	-0.250926
239.4	-0.528405	-0.778227	-0.352292	-2.52161	-1.9361	-1.56522	-0.406965	-0.35102	-0.0526872	-0.56012	-0.565299	-0.750973	-2.29864	-2.49903	-2.36118	-0.251428	-0.0948108	-0.375508	-0.473716	-0.77318	-0.781897	-4.07044	-3.578	-3.09296	-0.603765	-0.528308	-0.588741	-0.643028	-1.7288	-0.142473	-0.666907	-2.07135	-0.180893	-0.942792	-0.619483	-1.18458	-3.38462	-2.071	-1.49831	-0.401896	-0.406067	-0.433951	-0.91022	-0.566522	-0.83135	-5.06322	-3.25336	-1.6172	-0.269031
239.3	-0.533104	-0.762897	-0.418286	-2.57423	-1.97733	-1.64115	-0.364709	-0.323433	-0.118938	-0.585419	-0.609995	-0.781617	-2.31976	-2.51164	-2.45732	-0.240931	-0.0836073	-0.327979	-0.462298	-0.777624	-0.786275	-4.10525	-3.56193	-3.12353	-0.588461	-0.589605	-0.609889	-0.604437	-1.78223	-0.102942	-0.702967	-2.0948	-0.20049	-0.938573	-0.664056	-1.2099	-3.4681	-2.12872	-1.51138	-0.407491	-0.448347	-0.402909	-0.967162	-0.643083	-0.874231	-5.16106	-3.3398	-1.73094	-0.244815
239.2	-0.603197	-0.72766	-0.417542	-2.61783	-1.98747	-1.67751	-0.373748	-0.313176	-0.110252	-0.609607	-0.603232	-0.803796	-2.43266	-2.50291	-2.47304	-0.246064	-0.0873283	-0.320233	-0.472423	-0.856678	-0.73871	-4.15195	-3.64813	-3.15687	-0.599022	-0.593285	-0.616785	-0.671855	-1.80341	-0.091631	-0.729887	-2.09858	-0.180887	-0.99269	-0.691867	-1.14697	-3.53059	-2.20083	-1.54565	-0.385711	-0.421977	-0.456746	-0.994731	-0.694488	-0.849278	-5.2463	-3.41953	-1.75402	-0.241606
239.1	-0.568343	-0.70908	-0.426435	-2.63787	-2.01489	-1.7422	-0.375275	-0.337957	-0.153437	-0.638214	-0.652076	-0.794415	-2.48198	-2.5894	-2.49366	-0.234862	-0.104634	-0.333803	-0.488966	-0.873383	-0.767471	-4.13078	-3.68474	-3.19552	-0.632434	-0.58743	-0.607286	-0.649569	-1.86449	-0.0989879	-0.744132	-2.14851	-0.175347	-1.02497	-0.6857	-1.22164	-3.50245	-2.24225	-1.58156	-0.411913	-0.421773	-0.454798	-1.02984	-0.716108	-0.808811	-5.33738	-3.53615	-1.81558	-0.210037
239	-0.536567	-0.766421	-0.451072	-2.71326	-2.08529	-1.76971	-0.391965	-0.38666	-0.147702	-0.701351	-0.697788	-0.782151	-2.51841	-2.63075	-2.52609	-0.266096	-0.114748	-0.330752	-0.530331	-0.841378	-0.876586	-4.21844	-3.73932	-3.19801	-0.623714	-0.603307	-0.621864	-0.701957	-1.90094	-0.0449576	-0.739795	-2.17194	-0.227391	-1.05657	-0.701272	-1.22667	-3.56997	-2.28285	-1.61105	-0.428134	-0.408423	-0.448636	-1.0228	-0.738276	-0.880882	-5.51795	-3.54191	-1.88216	-0.272614
238.9	-0.569898	-0.757467	-0.535563	-2.79223	-2.1415	-1.84901	-0.329864	-0.370533	-0.161701	-0.685881	-0.739302	-0.780278	-2.56794	-2.67988	-2.60172	-0.283755	-0.128894	-0.301633	-0.579547	-0.868218	-0.870068	-4.21912	-3.81016	-3.26247	-0.623511	-0.638659	-0.600769	-0.710288	-1.88871	-0.0390322	-0.750783	-2.19341	-0.280715	-1.09447	-0.710221	-1.25368	-3.61633	-2.35083	-1.6351	-0.406463	-0.386788	-0.472557	-1.03502	-0.755002	-0.898249	-5.61742	-3.63689	-1.87766	-0.262039
238.8	-0.577396	-0.730445	-0.569457	-2.8247	-2.19799	-1.87245	-0.346004	-0.380817	-0.22204	-0.675027	-0.773756	-0.796332	-2.58358	-2.72177	-2.68092	-0.331223	-0.16393	-0.321137	-0.586167	-0.878169	-0.875928	-4.276	-3.82216	-3.32024	-0.665366	-0.634907	-0.597325	-0.728892	-1.89046	-0.0640888	-0.763122	-2.22129	-0.338314	-1.11625	-0.7002	-1.23544	-3.65201	-2.41359	-1.62133	-0.434469	-0.412399	-0.49195	-0.986803	-0.784973	-0.951572	-5.76133	-3.69423	-1.93489	-0.232754
238.7	-0.619114	-0.724223	-0.587134	-2.85261	-2.26965	-1.9367	-0.313722	-0.329708	-0.224942	-0.70771	-0.796247	-0.782274	-2.6237	-2.75971	-2.74228	-0.330169	-0.161812	-0.283199	-0.628465	-0.900368	-0.833724	-4.30169	-3.92599	-3.36159	-0.655842	-0.666185	-0.609314	-0.698763	-1.92474	-0.0599022	-0.772842	-2.26101	-0.36668	-1.11592	-0.733224	-1.22057	-3.70134	-2.41705	-1.63527	-0.449962	-0.410094	-0.506827	-1.02081	-0.828041	-0.971843	-5.88077	-3.73145	-1.98439	-0.224748
238.6	-0.619373	-0.774651	-0.663433	-2.90324	-2.3059	-1.97419	-0.30447	-0.350731	-0.235941	-0.705424	-0.801096	-0.792929	-2.65085	-2.80671	-2.76091	-0.376239	-0.158013	-0.21811	-0.588965	-0.919342	-0.822379	-4.40196	-3.8998	-3.45168	-0.666969	-0.638175	-0.617996	-0.70706	-2.01052	-0.0898353	-0.766754	-2.3035	-0.391273	-1.12114	-0.785306	-1.21182	-3.77225	-2.47666	-1.69678	-0.523076	-0.434795	-0.576366	-1.0293	-0.908798	-0.98104	-5.97607	-3.78074	-2.03365	-0.222013
238.5	-0.622713	-0.79529	-0.670678	-2.94723	-2.34179	-2.04124	-0.291275	-0.32352	-0.251589	-0.729334	-0.828996	-0.829758	-2.70589	-2.80633	-2.76613	-0.379666	-0.163203	-0.247744	-0.588703	-0.90277	-0.859274	-4.42394	-3.90504	-3.51261	-0.655312	-0.622211	-0.651627	-0.707669	-2.01815	-0.1053	-0.807361	-2.34256	-0.414107	-1.08513	-0.797612	-1.22322	-3.82945	-2.51159	-1.67791	-0.535622	-0.491462	-0.61016	-1.07659	-0.927602	-0.980438	-6.0598	-3.84689	-2.0675	-0.2405
238.4	-0.691483	-0.755761	-0.7308	-3.00559	-2.40232	-2.06159	-0.344691	-0.315915	-0.291116	-0.693295	-0.882792	-0.891799	-2.73237	-2.86606	-2.81964	-0.406276	-0.215062	-0.258272	-0.615435	-0.887174	-0.86349	-4.4671	-3.95605	-3.52731	-0.661106	-0.625078	-0.611048	-0.765687	-2.08838	-0.0400582	-0.773586	-2.36561	-0.440223	-1.0737	-0.841919	-1.24133	-3.88418	-2.5663	-1.71823	-0.552174	-0.439318	-0.565473	-1.09264	-0.954911	-0.961258	-6.16559	-3.8709	-2.1036	-0.20774
238.3	-0.740002	-0.756493	-0.758793	-3.09507	-2.43064	-2.03441	-0.339424	-0.319426	-0.311753	-0.697485	-0.876364	-0.928255	-2.79805	-2.89756	-2.8276	-0.395875	-0.229149	-0.234851	-0.645482	-0.927096	-0.896819	-4.53283	-3.97335	-3.49849	-0.676256	-0.659298	-0.579465	-0.728397	-2.16307	-0.0210487	-0.780721	-2.38191	-0.454354	-1.08938	-0.866004	-1.21859	-3.97911	-2.61674	-1.79121	-0.563526	-0.410693	-0.588159	-1.03191	-0.913315	-0.986444	-6.273	-3.91273	-2.12995	-0.20518
238.2	-0.768612	-0.762142	-0.827972	-3.16279	-2.47141	-2.07748	-0.314059	-0.337105	-0.279103	-0.71277	-0.863172	-0.894012	-2.83304	-2.99282	-2.8589	-0.344873	-0.233575	-0.249359	-0.664237	-0.959558	-0.92253	-4.59699	-4.04704	-3.56584	-0.69868	-0.656487	-0.571688	-0.720183	-2.22297	-0.0369716	-0.809999	-2.45959	-0.453765	-1.07728	-0.858521	-1.18181	-4.01031	-2.70985	-1.85866	-0.499813	-0.414027	-0.61014	-1.0401	-0.89497	-1.0342	-6.34343	-4.01095	-2.15459	-0.191798
238.1	-0.839551	-0.79251	-0.830862	-3.25978	-2.50745	-2.09063	-0.30409	-0.348029	-0.231327	-0.755479	-0.85384	-0.901564	-2.90207	-3.04848	-2.91252	-0.394448	-0.239873	-0.217478	-0.672965	-0.968014	-0.960021	-4.61789	-4.13087	-3.59806	-0.682258	-0.652244	-0.679433	-0.722795	-2.2242	-0.0585311	-0.832401	-2.49312	-0.473861	-1.10559	-0.872249	-1.1699	-4.03565	-2.79102	-1.91462	-0.542043	-0.483924	-0.557126	-1.05911	-0.902474	-1.03863	-6.39743	-4.01509	-2.16392	-0.200183
238	-0.81325	-0.797913	-0.846394	-3.34025	-2.622	-2.1196	-0.338955	-0.359691	-0.247268	-0.721454	-0.855453	-0.892497	-2.95032	-3.08876	-2.959	-0.403361	-0.21888	-0.169428	-0.700655	-1.0368	-1.00404	-4.784	-4.22341	-3.68951	-0.70649	-0.651339	-0.697214	-0.737158	-2.27933	-0.0357369	-0.837991	-2.51869	-0.470297	-1.10963	-0.92476	-1.15156	-4.09237	-2.8479	-1.9763	-0.55692	-0.477315	-0.57516	-1.10459	-0.966231	-1.11713	-6.53618	-4.11038	-2.22162	-0.232107
237.9	-0.849123	-0.795416	-0.815318	-3.42611	-2.65148	-2.16397	-0.369306	-0.371899	-0.252926	-0.749809	-0.877502	-0.892695	-3.00916	-3.20982	-3.06684	-0.415779	-0.209501	-0.1729	-0.756634	-1.03423	-1.04361	-4.82241	-4.25233	-3.78867	-0.701998	-0.675419	-0.688659	-0.788818	-2.35027	-0.0697003	-0.858858	-2.61524	-0.497584	-1.09694	-0.955549	-1.16189	-4.26819	-2.91683	-2.00106	-0.555151	-0.485393	-0.572949	-1.15463	-1.03859	-1.11375	-6.73763	-4.13904	-2.27167	-0.217875
237.8	-0.864204	-0.804976	-0.816445	-3.47512	-2.74467	-2.21446	-0.36823	-0.372269	-0.280577	-0.760508	-0.88891	-0.879062	-3.01092	-3.26413	-3.11315	-0.47028	-0.214434	-0.198573	-0.720171	-0.996593	-1.04485	-4.90192	-4.38448	-3.78868	-0.66352	-0.708366	-0.692995	-0.847518	-2.36318	-0.0809601	-0.796396	-2.68157	-0.520757	-1.11397	-1.01599	-1.13169	-4.30733	-2.98699	-2.03721	-0.520436	-0.487391	-0.571692	-1.17689	-1.01318	-1.16603	-6.87435	-4.16879	-2.34493	-0.268772
237.7	-0.845905	-0.825593	-0.82283	-3.57072	-2.76066	-2.26533	-0.372928	-0.402734	-0.299266	-0.781183	-0.936915	-0.888876	-3.05501	-3.35071	-3.16521	-0.437963	-0.245523	-0.230055	-0.789403	-0.967815	-1.08941	-4.95114	-4.40474	-3.86015	-0.635924	-0.708087	-0.725348	-0.853506	-2.38667	-0.0731965	-0.83863	-2.67401	-0.524049	-1.14778	-1.01217	-1.10276	-4.36461	-3.04842	-2.06356	-0.497194	-0.494229	-0.559297	-1.17173	-1.03312	-1.17687	-6.91467	-4.22262	-2.34926	-0.312574
237.6	-0.846768	-0.824593	-0.851382	-3.62071	-2.86591	-2.32517	-0.340939	-0.416724	-0.36918	-0.832008	-0.979161	-0.921418	-3.11902	-3.35862	-3.25927	-0.471161	-0.224763	-0.196019	-0.814119	-0.982771	-1.06873	-4.96629	-4.45843	-3.83836	-0.651847	-0.675563	-0.692938	-0.862432	-2.47287	-0.0450536	-0.817884	-2.73306	-0.540916	-1.12322	-1.01424	-1.16537	-4.42438	-3.12009	-2.10509	-0.471862	-0.498444	-0.564631	-1.17117	-1.14866	-1.19463	-7.09323	-4.27189	-2.38804	-0.282602
237.5	-0.867736	-0.79722	-0.900875	-3.68639	-2.90336	-2.36197	-0.357603	-0.419899	-0.389679	-0.834927	-0.928073	-0.901544	-3.22172	-3.40971	-3.31327	-0.479494	-0.200426	-0.23761	-0.857545	-0.986626	-1.13552	-5.07724	-4.46973	-3.91261	-0.625814	-0.657505	-0.712734	-0.843583	-2.52285	-0.0423964	-0.806971	-2.75974	-0.530718	-1.05392	-0.992537	-1.23367	-4.51832	-3.18917	-2.14529	-0.48465	-0.506117	-0.575783	-1.19425	-1.13192	-1.18394	-7.1913	-4.32588	-2.43111	-0.295125
237.4	-0.895419	-0.77352	-0.895252	-3.70669	-2.97639	-2.39313	-0.38338	-0.394108	-0.405856	-0.827467	-0.916965	-0.910743	-3.27282	-3.45336	-3.36424	-0.473691	-0.240415	-0.257555	-0.855968	-1.01092	-1.12474	-5.14854	-4.51941	-3.95701	-0.610813	-0.712676	-0.725978	-0.859039	-2.58058	-0.0923609	-0.823852	-2.78185	-0.583326	-1.0657	-1.03968	-1.2356	-4.55807	-3.32807	-2.20518	-0.486967	-0.543914	-0.555428	-1.20219	-1.10953	-1.2437	-7.34307	-4.32476	-2.45785	-0.34196
237.3	-0.843759	-0.753686	-0.900126	-3.80744	-3.01438	-2.43392	-0.423094	-0.445094	-0.460968	-0.806625	-0.915754	-0.876171	-3.28033	-3.52503	-3.42287	-0.494622	-0.28511	-0.3073	-0.893228	-1.08251	-1.10981	-5.19592	-4.59498	-3.9931	-0.658832	-0.746884	-0.767769	-0.878264	-2.62254	-0.146891	-0.833635	-2.84782	-0.605469	-1.11639	-1.04038	-1.28641	-4.58748	-3.40471	-2.22152	-0.533035	-0.508713	-0.541053	-1.21516	-1.12841	-1.22719	-7.41832	-4.34157	-2.54951	-0.280894
237.2	-0.866354	-0.740302	-0.938636	-3.86248	-3.08583	-2.44333	-0.457354	-0.420967	-0.422055	-0.839653	-0.926199	-0.82443	-3.30817	-3.5822	-3.51231	-0.513719	-0.32409	-0.316145	-0.970879	-1.12827	-1.12464	-5.22878	-4.62122	-4.08654	-0.612833	-0.675298	-0.719033	-0.947716	-2.64887	-0.185738	-0.841552	-2.90557	-0.592646	-1.16083	-1.04752	-1.23966	-4.62997	-3.45091	-2.23476	-0.482343	-0.472142	-0.530822	-1.26439	-1.1881	-1.2414	-7.53295	-4.41009	-2.61422	-0.276256
237.1	-0.900768	-0.762428	-0.960786	-3.95253	-3.18413	-2.52286	-0.443048	-0.505214	-0.403332	-0.818174	-0.881125	-0.831741	-3.41679	-3.58398	-3.58186	-0.453683	-0.317658	-0.298897	-0.9671	-1.10569	-1.11238	-5.24837	-4.65884	-4.11764	-0.656353	-0.696931	-0.747781	-0.956222	-2.72034	-0.218795	-0.863909	-2.95529	-0.532293	-1.17977	-1.08732	-1.18601	-4.71715	-3.45162	-2.27132	-0.489273	-0.436658	-0.578519	-1.30288	-1.23053	-1.29606	-7.62857	-4.45836	-2.71377	-0.258629
237	-0.91866	-0.753271	-0.998037	-4.04251	-3.24419	-2.60863	-0.41282	-0.51869	-0.371611	-0.876444	-0.887169	-0.814713	-3.51597	-3.63231	-3.63363	-0.420109	-0.347439	-0.33966	-1.01134	-1.11432	-1.14169	-5.34162	-4.70053	-4.12682	-0.679729	-0.65526	-0.78782	-1.00539	-2.76885	-0.250495	-0.853498	-3.02057	-0.531989	-1.25661	-1.03929	-1.17187	-4.84209	-3.53532	-2.30579	-0.492279	-0.40959	-0.532876	-1.35045	-1.26508	-1.31101	-7.77358	-4.52407	-2.79998	-0.23644
236.9	-0.937284	-0.751453	-0.975092	-4.18736	-3.27635	-2.6226	-0.433594	-0.5195	-0.393489	-0.900535	-0.886161	-0.815242	-3.60001	-3.70183	-3.73409	-0.443523	-0.369248	-0.330935	-1.03288	-1.1238	-1.17663	-5.44987	-4.8187	-4.16389	-0.708094	-0.627738	-0.81482	-1.00907	-2.85591	-0.295666	-0.880276	-3.12015	-0.499198	-1.22975	-1.08262	-1.17837	-4.90409	-3.63186	-2.3843	-0.541334	-0.440303	-0.562231	-1.37716	-1.30377	-1.28044	-7.90766	-4.62406	-2.86434	-0.232355
236.8	-0.948536	-0.751112	-1.01044	-4.23941	-3.31003	-2.67734	-0.44876	-0.526003	-0.391092	-0.893139	-0.940273	-0.883273	-3.69686	-3.73499	-3.78336	-0.446329	-0.400637	-0.359304	-0.998141	-1.14411	-1.16136	-5.51279	-4.88968	-4.27017	-0.716682	-0.609877	-0.845324	-1.06985	-2.93077	-0.29927	-0.880836	-3.19592	-0.468234	-1.27403	-1.08289	-1.22019	-4.96197	-3.68334	-2.38467	-0.524161	-0.48278	-0.612285	-1.40029	-1.31644	-1.29663	-8.06334	-4.69733	-2.88075	-0.239728
236.7	-0.93729	-0.769889	-1.01576	-4.35477	-3.39439	-2.74446	-0.437771	-0.566341	-0.393165	-0.937256	-0.954536	-0.873743	-3.81011	-3.79555	-3.85272	-0.45906	-0.393761	-0.35311	-0.988393	-1.12672	-1.16448	-5.56973	-4.89402	-4.3132	-0.712423	-0.602099	-0.880952	-1.10599	-2.9802	-0.258801	-0.878527	-3.20793	-0.492849	-1.29644	-1.06038	-1.18149	-4.98528	-3.67592	-2.40951	-0.535472	-0.472956	-0.61186	-1.45279	-1.33745	-1.29924	-8.11969	-4.75414	-2.88926	-0.280163
236.6	-0.915155	-0.799123	-1.01854	-4.41936	-3.4232	-2.76203	-0.397598	-0.544178	-0.39578	-0.895925	-0.980748	-0.887719	-3.85594	-3.81315	-3.89065	-0.475654	-0.426683	-0.344552	-1.00906	-1.11009	-1.18441	-5.58506	-4.94812	-4.38044	-0.746466	-0.605889	-0.883456	-1.18356	-3.01401	-0.303417	-0.852284	-3.18559	-0.499354	-1.30808	-1.06352	-1.15426	-5.04504	-3.69935	-2.45181	-0.552166	-0.503021	-0.60232	-1.47611	-1.32306	-1.31221	-8.23617	-4.81266	-2.92634	-0.319448
236.5	-0.917672	-0.795575	-1.06849	-4.45113	-3.49332	-2.82137	-0.402564	-0.52195	-0.430053	-0.876114	-0.964222	-0.895591	-3.93845	-3.90023	-3.95207	-0.467155	-0.473277	-0.37992	-1.051	-1.07846	-1.14936	-5.62608	-5.00518	-4.40596	-0.759055	-0.63137	-0.881825	-1.14746	-3.07633	-0.279994	-0.836179	-3.27155	-0.545871	-1.36939	-1.09014	-1.13692	-5.20083	-3.73067	-2.51471	-0.639115	-0.495372	-0.569599	-1.49088	-1.34586	-1.31402	-8.34566	-4.86185	-2.99958	-0.307445
236.4	-0.908724	-0.800015	-1.03524	-4.53716	-3.54748	-2.82083	-0.382111	-0.490307	-0.450923	-0.883977	-1.01001	-0.908813	-3.97871	-4.02866	-3.94232	-0.515852	-0.492442	-0.413858	-1.11044	-1.06558	-1.14848	-5.64778	-5.10532	-4.42902	-0.706574	-0.592764	-0.905025	-1.2013	-3.11209	-0.333035	-0.832793	-3.3236	-0.531132	-1.39121	-1.16865	-1.14458	-5.28573	-3.76521	-2.52943	-0.651465	-0.531871	-0.565916	-1.50463	-1.32797	-1.39438	-8.51408	-4.91998	-3.02392	-0.303204
236.3	-0.946077	-0.809083	-1.09069	-4.67019	-3.56337	-2.80498	-0.368322	-0.495767	-0.428708	-0.950526	-1.09024	-0.932133	-4.08652	-4.08343	-4.044	-0.524027	-0.491592	-0.434102	-1.14726	-1.11062	-1.1637	-5.6908	-5.17636	-4.4553	-0.716229	-0.601139	-0.980227	-1.21441	-3.18626	-0.350048	-0.816422	-3.36304	-0.539372	-1.46776	-1.22202	-1.15812	-5.35542	-3.84907	-2.60392	-0.705942	-0.538929	-0.568876	-1.51962	-1.39046	-1.31985	-8.67256	-4.98841	-3.09496	-0.349124
236.2	-0.963258	-0.836492	-1.10463	-4.75605	-3.63705	-2.88765	-0.404119	-0.555104	-0.46671	-0.986661	-1.14206	-0.927066	-4.13415	-4.15825	-4.13072	-0.533138	-0.496858	-0.468995	-1.15008	-1.10226	-1.14949	-5.81028	-5.22857	-4.50015	-0.741422	-0.539754	-0.974315	-1.22836	-3.22916	-0.395347	-0.789447	-3.39451	-0.577249	-1.54211	-1.30629	-1.16571	-5.41437	-3.8797	-2.68978	-0.724812	-0.534924	-0.592521	-1.54309	-1.45145	-1.31306	-8.7472	-5.03808	-3.17836	-0.354302
236.1	-0.915422	-0.873364	-1.17789	-4.83127	-3.7005	-2.95561	-0.449721	-0.551719	-0.435986	-0.987495	-1.18275	-0.963866	-4.15238	-4.21769	-4.23633	-0.53002	-0.470947	-0.442425	-1.15906	-1.09246	-1.17055	-5.88685	-5.35328	-4.56713	-0.783366	-0.548459	-0.989047	-1.23917	-3.28317	-0.455395	-0.818419	-3.41773	-0.541725	-1.57283	-1.3619	-1.17741	-5.50774	-3.92547	-2.78783	-0.760824	-0.515995	-0.617	-1.57091	-1.5219	-1.32352	-8.8671	-5.07708	-3.2278	-0.335494
236	-0.956449	-0.899908	-1.20856	-4.88574	-3.80295	-3.01015	-0.466037	-0.596162	-0.476382	-0.998028	-1.15236	-0.954359	-4.25183	-4.30736	-4.30216	-0.471561	-0.555148	-0.479217	-1.19672	-1.08997	-1.18935	-5.97	-5.45637	-4.67514	-0.791198	-0.574825	-0.980218	-1.2618	-3.40021	-0.463273	-0.791863	-3.43168	-0.560113	-1.63424	-1.3714	-1.18685	-5.56813	-4.00729	-2.83541	-0.778833	-0.54818	-0.611516	-1.6292	-1.53804	-1.37163	-8.93782	-5.14413	-3.31435	-0.312381
235.9	-0.965202	-0.945531	-1.17966	-4.98193	-3.90167	-3.05059	-0.463113	-0.587573	-0.47779	-0.976064	-1.16638	-0.990462	-4.38855	-4.33393	-4.33815	-0.500175	-0.566006	-0.527566	-1.21606	-1.12133	-1.19329	-6.05647	-5.53534	-4.71182	-0.808287	-0.52477	-0.97407	-1.32016	-3.42918	-0.449228	-0.819601	-3.56368	-0.56232	-1.697	-1.36293	-1.17703	-5.6718	-4.10473	-2.91018	-0.819153	-0.517888	-0.652268	-1.64703	-1.52069	-1.37558	-9.07403	-5.20829	-3.30618	-0.292768
235.8	-0.941267	-0.952712	-1.20654	-5.04266	-3.96035	-3.11147	-0.486533	-0.577643	-0.518474	-0.985407	-1.18356	-0.993288	-4.41925	-4.39911	-4.41021	-0.49371	-0.568661	-0.532396	-1.19706	-1.1065	-1.26259	-6.15079	-5.63663	-4.82616	-0.867765	-0.544776	-1.01374	-1.2912	-3.50072	-0.482285	-0.835487	-3.67363	-0.555232	-1.716	-1.36841	-1.2421	-5.77505	-4.1791	-2.97921	-0.832406	-0.498389	-0.62578	-1.71685	-1.53224	-1.40547	-9.20076	-5.24303	-3.3467	-0.27383
235.7	-0.965708	-0.985125	-1.21691	-5.14601	-4.042	-3.13553	-0.472809	-0.582144	-0.51781	-1.00292	-1.18972	-0.973761	-4.43589	-4.44636	-4.46289	-0.508937	-0.554884	-0.538853	-1.2339	-1.05307	-1.26658	-6.24305	-5.70791	-4.87107	-0.853668	-0.531401	-1.058	-1.34201	-3.5096	-0.481053	-0.865903	-3.71926	-0.586532	-1.73522	-1.39382	-1.215	-5.89402	-4.18949	-3.04271	-0.814636	-0.489463	-0.678071	-1.75611	-1.56082	-1.48739	-9.27649	-5.24172	-3.34752	-0.286417
235.6	-0.961872	-1.00434	-1.21856	-5.26635	-4.06666	-3.20179	-0.480127	-0.574363	-0.52829	-0.955421	-1.18116	-0.975186	-4.51921	-4.50158	-4.55465	-0.509773	-0.60108	-0.593715	-1.22533	-1.07241	-1.23137	-6.32732	-5.87551	-4.95829	-0.879637	-0.523619	-1.04787	-1.34315	-3.57757	-0.480391	-0.893913	-3.73713	-0.608224	-1.72009	-1.45262	-1.21523	-5.94371	-4.25911	-3.11979	-0.864503	-0.449313	-0.686369	-1.78592	-1.54589	-1.5297	-9.33853	-5.2936	-3.38214	-0.246984
235.5	-0.976492	-1.03632	-1.1788	-5.3531	-4.12884	-3.20663	-0.575776	-0.627143	-0.509386	-0.997916	-1.17619	-0.957427	-4.59896	-4.5471	-4.60764	-0.504065	-0.559443	-0.629802	-1.22897	-1.06036	-1.26005	-6.3999	-5.90497	-4.99751	-0.908004	-0.517334	-1.05042	-1.40076	-3.68613	-0.513891	-0.930302	-3.79255	-0.592231	-1.75491	-1.54471	-1.22897	-6.02328	-4.36333	-3.20309	-0.864079	-0.476842	-0.658861	-1.78114	-1.56749	-1.55106	-9.47172	-5.29612	-3.47766	-0.280978
235.4	-0.996034	-1.0876	-1.19621	-5.41109	-4.13657	-3.28268	-0.590713	-0.650602	-0.522248	-1.07351	-1.18969	-0.980777	-4.65304	-4.64222	-4.64813	-0.476002	-0.517297	-0.612988	-1.2205	-1.11106	-1.27816	-6.52118	-6.02936	-5.07041	-0.867182	-0.49998	-1.07986	-1.43479	-3.8342	-0.510847	-0.938139	-3.85513	-0.521876	-1.7291	-1.59162	-1.25486	-6.13314	-4.41815	-3.28502	-0.869007	-0.522489	-0.674252	-1.85882	-1.61938	-1.57183	-9.56897	-5.34473	-3.5342	-0.301731
235.3	-0.956574	-1.06581	-1.19271	-5.52412	-4.18717	-3.3066	-0.617657	-0.642154	-0.553134	-1.08882	-1.20799	-0.973113	-4.74863	-4.69729	-4.64273	-0.470602	-0.5436	-0.622393	-1.17572	-1.13377	-1.32012	-6.63857	-6.02821	-5.19519	-0.867543	-0.505801	-1.1062	-1.45203	-3.88608	-0.545624	-0.961884	-3.95109	-0.497841	-1.7451	-1.56457	-1.31852	-6.19452	-4.51228	-3.39605	-0.88514	-0.519709	-0.638042	-1.84474	-1.64706	-1.57504	-9.62001	-5.40805	-3.56064	-0.338742
235.2	-0.968118	-0.998445	-1.12554	-5.68048	-4.24666	-3.36411	-0.636617	-0.621944	-0.537814	-1.13004	-1.24411	-0.960921	-4.79466	-4.74815	-4.80915	-0.500192	-0.547228	-0.619813	-1.17088	-1.14369	-1.36025	-6.7454	-6.13082	-5.278	-0.837272	-0.493062	-1.09447	-1.47222	-3.88447	-0.56403	-0.995789	-4.03917	-0.541081	-1.7444	-1.59838	-1.35788	-6.25849	-4.59106	-3.46966	-0.800196	-0.549144	-0.622686	-1.82171	-1.65785	-1.61066	-9.73282	-5.50411	-3.63003	-0.365208
235.1	-1.01157	-1.01744	-1.12142	-5.76384	-4.31708	-3.3557	-0.666246	-0.625401	-0.533588	-1.14114	-1.26029	-0.942394	-4.85064	-4.86022	-4.90071	-0.478332	-0.487316	-0.641479	-1.27249	-1.16307	-1.37113	-6.84041	-6.26324	-5.40637	-0.883928	-0.518536	-1.10893	-1.49183	-4.00178	-0.564169	-0.989121	-4.10551	-0.517157	-1.79695	-1.59455	-1.33858	-6.39547	-4.70494	-3.47868	-0.760915	-0.506122	-0.62513	-1.81174	-1.67628	-1.65009	-9.87808	-5.60604	-3.69622	-0.381167
235	-0.97728	-1.02564	-1.0867	-5.90769	-4.434	-3.47248	-0.651497	-0.646918	-0.592353	-1.1845	-1.28685	-0.936534	-4.95503	-4.92757	-4.9463	-0.462747	-0.464876	-0.681923	-1.2688	-1.24438	-1.40063	-6.91065	-6.37301	-5.59387	-0.888431	-0.540114	-1.16013	-1.52849	-4.04841	-0.596785	-1.08211	-4.2187	-0.540426	-1.85983	-1.59015	-1.39486	-6.47113	-4.76908	-3.53026	-0.747188	-0.593966	-0.63773	-1.84511	-1.69698	-1.74744	-10.0431	-5.73254	-3.69624	-0.392906
234.9	-0.947546	-1.04013	-1.06467	-6.021	-4.50622	-3.55822	-0.668931	-0.659595	-0.585752	-1.17052	-1.26647	-0.937688	-5.04927	-5.04245	-5.0335	-0.490592	-0.427148	-0.720116	-1.30945	-1.26156	-1.42292	-6.92064	-6.42786	-5.67511	-0.910247	-0.474229	-1.17003	-1.61604	-4.07272	-0.637913	-1.13315	-4.29952	-0.523253	-1.85155	-1.55142	-1.43341	-6.59169	-4.84499	-3.57903	-0.827486	-0.659003	-0.614655	-1.8902	-1.72336	-1.74497	-10.1142	-5.82831	-3.70733	-0.37166
234.8	-0.943175	-0.985213	-1.06443	-6.13821	-4.57906	-3.63395	-0.718449	-0.636117	-0.618178	-1.17781	-1.29233	-0.918732	-5.09402	-5.11801	-5.1206	-0.515045	-0.40173	-0.727604	-1.33603	-1.298	-1.41899	-6.98104	-6.46068	-5.76692	-0.950783	-0.50578	-1.19488	-1.59343	-4.16512	-0.641554	-1.13784	-4.3649	-0.468598	-1.91214	-1.58	-1.45678	-6.75178	-4.92358	-3.68692	-0.797363	-0.615731	-0.635492	-1.91569	-1.74448	-1.71911	-10.2626	-5.90805	-3.76393	-0.377512
234.7	-0.946371	-1.01525	-1.07931	-6.22421	-4.65445	-3.67712	-0.743899	-0.657485	-0.689661	-1.2432	-1.32357	-0.937287	-5.11205	-5.1952	-5.1392	-0.492658	-0.415577	-0.758403	-1.36386	-1.329	-1.42689	-7.03733	-6.5365	-5.83609	-0.96149	-0.488332	-1.18766	-1.60067	-4.21956	-0.619224	-1.13055	-4.42824	-0.481481	-1.94917	-1.55552	-1.46473	-6.82856	-4.95692	-3.73552	-0.782504	-0.583253	-0.704304	-1.95198	-1.76066	-1.71279	-10.3693	-5.96814	-3.81349	-0.37437
234.6	-1.00679	-1.04061	-1.07245	-6.38066	-4.68679	-3.74351	-0.745676	-0.676239	-0.668238	-1.25642	-1.32532	-0.958292	-5.12994	-5.29453	-5.2538	-0.479854	-0.438806	-0.820239	-1.38694	-1.34312	-1.42932	-7.02887	-6.59449	-5.94714	-0.953216	-0.41598	-1.19895	-1.61988	-4.30185	-0.56363	-1.14404	-4.57483	-0.475112	-1.93626	-1.4992	-1.52661	-6.97355	-5.01925	-3.77658	-0.822368	-0.598651	-0.704786	-1.98811	-1.69932	-1.70606	-10.4868	-6.07738	-3.82644	-0.400713
234.5	-0.962726	-1.05439	-1.1051	-6.50646	-4.81749	-3.7758	-0.73206	-0.662708	-0.67137	-1.26916	-1.35165	-0.997039	-5.21394	-5.3603	-5.32342	-0.470524	-0.442557	-0.811801	-1.35685	-1.34426	-1.45605	-7.09295	-6.74063	-6.01249	-0.932889	-0.431345	-1.26853	-1.61707	-4.40061	-0.563238	-1.14974	-4.62407	-0.46484	-2.00344	-1.49056	-1.57517	-7.09271	-5.1011	-3.8433	-0.833091	-0.576634	-0.68918	-1.98874	-1.73263	-1.73696	-10.566	-6.13144	-3.87885	-0.429032
234.4	-0.999173	-1.12481	-1.15234	-6.63199	-4.86704	-3.83658	-0.7238	-0.656071	-0.602438	-1.254	-1.37717	-1.01972	-5.33002	-5.47197	-5.40606	-0.443185	-0.451613	-0.841065	-1.39741	-1.37328	-1.50642	-7.18049	-6.74996	-6.16873	-0.972093	-0.450381	-1.28175	-1.62359	-4.49592	-0.57895	-1.24181	-4.67133	-0.414176	-2.04726	-1.53049	-1.61345	-7.22056	-5.13458	-3.90068	-0.844784	-0.560204	-0.676837	-2.00318	-1.78247	-1.70672	-10.6636	-6.17894	-3.91531	-0.419356
234.3	-1.04952	-1.13392	-1.18004	-6.6751	-4.94652	-3.90048	-0.766635	-0.619353	-0.592738	-1.27565	-1.3724	-1.02341	-5.38598	-5.46962	-5.51596	-0.48068	-0.457323	-0.825741	-1.36758	-1.39861	-1.53509	-7.24909	-6.82215	-6.2667	-1.02981	-0.502388	-1.3081	-1.69028	-4.57967	-0.615816	-1.2445	-4.74282	-0.421749	-2.06246	-1.55948	-1.62459	-7.38525	-5.19266	-3.9712	-0.876782	-0.599777	-0.705742	-2.0236	-1.78712	-1.7438	-10.8492	-6.23789	-3.98113	-0.400593
234.2	-1.00471	-1.18144	-1.20134	-6.79563	-4.98077	-4.04911	-0.816772	-0.639248	-0.61353	-1.27988	-1.39425	-1.0521	-5.42238	-5.53347	-5.58911	-0.464668	-0.494442	-0.854019	-1.38813	-1.46548	-1.57192	-7.40465	-6.8936	-6.41793	-1.02112	-0.584651	-1.33594	-1.69028	-4.61008	-0.641669	-1.29975	-4.83039	-0.460051	-2.10095	-1.61277	-1.585	-7.49279	-5.25379	-4.02959	-0.875522	-0.619741	-0.673779	-2.01516	-1.76113	-1.73214	-10.937	-6.37716	-4.10619	-0.434204
234.1	-0.955766	-1.19637	-1.23419	-6.93784	-5.04352	-4.06903	-0.805284	-0.658987	-0.613711	-1.34292	-1.4408	-1.03677	-5.51515	-5.63013	-5.63758	-0.546571	-0.489762	-0.848754	-1.37905	-1.46733	-1.53545	-7.48339	-7.10245	-6.57816	-1.02655	-0.589722	-1.425	-1.7146	-4.77359	-0.620747	-1.31853	-4.98191	-0.464363	-2.16222	-1.59726	-1.56018	-7.63122	-5.30128	-4.12463	-0.88384	-0.607291	-0.736842	-2.01073	-1.82504	-1.85636	-11.0796	-6.47323	-4.17103	-0.472055
234	-0.998778	-1.19573	-1.24217	-7.00737	-5.10343	-4.12092	-0.810018	-0.686024	-0.581386	-1.39861	-1.42678	-1.0561	-5.59587	-5.74473	-5.71717	-0.532864	-0.499225	-0.788755	-1.4349	-1.47683	-1.56885	-7.57618	-7.21683	-6.65068	-1.02394	-0.562153	-1.41564	-1.76402	-4.84775	-0.613168	-1.26423	-5.08643	-0.462309	-2.14994	-1.59529	-1.58726	-7.70795	-5.30452	-4.18038	-0.946546	-0.612128	-0.749861	-2.04216	-1.8864	-1.88786	-11.2097	-6.57245	-4.28782	-0.476604
233.9	-1.07064	-1.23013	-1.24244	-7.1035	-5.17827	-4.18369	-0.804715	-0.66414	-0.58102	-1.3842	-1.42208	-1.13669	-5.61508	-5.75819	-5.75181	-0.536086	-0.517006	-0.733181	-1.46437	-1.47839	-1.55828	-7.64983	-7.2701	-6.6924	-0.989072	-0.597091	-1.43402	-1.79829	-4.93871	-0.602713	-1.26278	-5.13994	-0.439736	-2.20838	-1.61295	-1.57401	-7.84295	-5.34685	-4.25231	-1.00553	-0.695272	-0.725589	-2.081	-1.85119	-1.88196	-11.3373	-6.68896	-4.30279	-0.530202
233.8	-1.13615	-1.27315	-1.25052	-7.23142	-5.29254	-4.31429	-0.850312	-0.681204	-0.581746	-1.42659	-1.4958	-1.18159	-5.70607	-5.90914	-5.84292	-0.568666	-0.506561	-0.759647	-1.45421	-1.48363	-1.51016	-7.76766	-7.3888	-6.83342	-1.01781	-0.618861	-1.48563	-1.75614	-5.0123	-0.58467	-1.29922	-5.27575	-0.456176	-2.1762	-1.66774	-1.64319	-7.98061	-5.46475	-4.35295	-1.06741	-0.767653	-0.666418	-2.12044	-1.84384	-1.94048	-11.4936	-6.82473	-4.40269	-0.506944
233.7	-1.11397	-1.27361	-1.28654	-7.37093	-5.32292	-4.35063	-0.845816	-0.65127	-0.63999	-1.42978	-1.49515	-1.2536	-5.71651	-5.99744	-5.93669	-0.561545	-0.509021	-0.751124	-1.50345	-1.46732	-1.5521	-7.90943	-7.48009	-6.84043	-0.985797	-0.613732	-1.46078	-1.78722	-5.09797	-0.590303	-1.31365	-5.39848	-0.463985	-2.21346	-1.68941	-1.6938	-8.04834	-5.5508	-4.49978	-1.07492	-0.776304	-0.648659	-2.15183	-1.85452	-1.95946	-11.6226	-6.89899	-4.41204	-0.544956
233.6	-1.09191	-1.35576	-1.32639	-7.47385	-5.51845	-4.45326	-0.940673	-0.707433	-0.640731	-1.42156	-1.50278	-1.27747	-5.81297	-6.03693	-6.06556	-0.587628	-0.472051	-0.805665	-1.57183	-1.48232	-1.55432	-7.95424	-7.54408	-6.97405	-0.98311	-0.668822	-1.46727	-1.76437	-5.16095	-0.603044	-1.27893	-5.4789	-0.50249	-2.20027	-1.6826	-1.73805	-8.20279	-5.6882	-4.55947	-1.10062	-0.804311	-0.64696	-2.17222	-1.88894	-2.02406	-11.7318	-7.04727	-4.48027	-0.599671
233.5	-1.12624	-1.36393	-1.37302	-7.60773	-5.66064	-4.57424	-0.936778	-0.711739	-0.642926	-1.40883	-1.5128	-1.30207	-5.86206	-6.07819	-6.10248	-0.603628	-0.506652	-0.791131	-1.61057	-1.5537	-1.58218	-8.03055	-7.59866	-7.06789	-0.958521	-0.703745	-1.47592	-1.77144	-5.31035	-0.625099	-1.30767	-5.55298	-0.567721	-2.22649	-1.70117	-1.73383	-8.31001	-5.77476	-4.6352	-1.09903	-0.848563	-0.57108	-2.19848	-1.9073	-2.02306	-11.8157	-7.10596	-4.50519	-0.600504
233.4	-1.18002	-1.36912	-1.41002	-7.67661	-5.70861	-4.66344	-0.989897	-0.733119	-0.667452	-1.42064	-1.55047	-1.20571	-5.92666	-6.21514	-6.16139	-0.623551	-0.49327	-0.818948	-1.65087	-1.5566	-1.61015	-8.12998	-7.71572	-7.13116	-0.960159	-0.707781	-1.51473	-1.78238	-5.43577	-0.594896	-1.33159	-5.65784	-0.578468	-2.2703	-1.73934	-1.7789	-8.46399	-5.83964	-4.66915	-1.09722	-0.862464	-0.591375	-2.21992	-1.95008	-2.06769	-11.8774	-7.14741	-4.56991	-0.590946
233.3	-1.19719	-1.36742	-1.37245	-7.78428	-5.80071	-4.74584	-1.03692	-0.781913	-0.694945	-1.51804	-1.55718	-1.26763	-5.97389	-6.27393	-6.25762	-0.65799	-0.522448	-0.853133	-1.66106	-1.58177	-1.64009	-8.24747	-7.81516	-7.26624	-0.91826	-0.737715	-1.598	-1.77557	-5.47725	-0.672406	-1.40657	-5.82498	-0.587915	-2.28612	-1.78182	-1.79302	-8.58348	-5.97177	-4.70634	-1.06204	-0.866014	-0.606193	-2.26128	-1.95683	-2.1176	-12.0447	-7.2373	-4.63165	-0.572954
233.2	-1.16651	-1.40093	-1.39071	-7.89358	-5.80949	-4.81571	-1.07386	-0.779274	-0.678721	-1.53799	-1.59228	-1.22469	-6.04787	-6.28666	-6.33547	-0.675311	-0.519394	-0.812483	-1.63542	-1.59122	-1.69494	-8.34494	-7.85684	-7.38203	-0.911468	-0.721477	-1.63561	-1.7922	-5.5018	-0.630207	-1.45659	-5.87605	-0.541429	-2.29571	-1.76326	-1.83269	-8.62536	-6.04456	-4.74673	-1.01377	-0.868196	-0.653684	-2.27935	-1.95239	-2.20432	-12.1332	-7.29278	-4.6674	-0.585401
233.1	-1.19193	-1.36492	-1.41448	-7.99104	-5.90108	-4.89236	-1.09998	-0.751891	-0.683394	-1.5995	-1.60107	-1.23703	-6.16854	-6.27323	-6.45739	-0.657576	-0.512698	-0.803081	-1.64709	-1.61429	-1.69639	-8.41262	-7.93097	-7.47336	-0.969228	-0.774698	-1.63665	-1.79679	-5.5889	-0.577901	-1.42129	-5.92043	-0.519333	-2.34513	-1.76122	-1.84873	-8.69647	-6.12947	-4.84501	-0.999991	-0.89656	-0.667714	-2.28622	-2.02168	-2.19947	-12.2071	-7.31502	-4.7391	-0.629868
233	-1.19273	-1.34846	-1.40814	-8.06366	-5.98649	-5.03364	-1.10775	-0.766288	-0.691758	-1.59626	-1.54252	-1.252	-6.18021	-6.40322	-6.54183	-0.675008	-0.542783	-0.77237	-1.68242	-1.66974	-1.6708	-8.51054	-7.99422	-7.60945	-0.994259	-0.78438	-1.60905	-1.83379	-5.65997	-0.537008	-1.41216	-5.97557	-0.472084	-2.29252	-1.75179	-1.88773	-8.76632	-6.19589	-4.88285	-0.956523	-0.930103	-0.684186	-2.24473	-2.04553	-2.25311	-12.3072	-7.28385	-4.75785	-0.648118
232.9	-1.26469	-1.37266	-1.39844	-8.12189	-6.12349	-5.0925	-1.11804	-0.764783	-0.680664	-1.57768	-1.56451	-1.23709	-6.28653	-6.44333	-6.62161	-0.661021	-0.533139	-0.748426	-1.67194	-1.68558	-1.67811	-8.53553	-8.05375	-7.65626	-1.03074	-0.792325	-1.60915	-1.88606	-5.72031	-0.530217	-1.45479	-6.06398	-0.46057	-2.29559	-1.73754	-1.86974	-8.90087	-6.22457	-4.9032	-0.972026	-0.947075	-0.650409	-2.23584	-2.00877	-2.27913	-12.3944	-7.30922	-4.82478	-0.614252
232.8	-1.29459	-1.34506	-1.4279	-8.22067	-6.21054	-5.12681	-1.16011	-0.725577	-0.647151	-1.57293	-1.54468	-1.26243	-6.3064	-6.48563	-6.7115	-0.685744	-0.583914	-0.722611	-1.71795	-1.73697	-1.70078	-8.58184	-8.09771	-7.72691	-0.97195	-0.820187	-1.60577	-1.90695	-5.80845	-0.468357	-1.48289	-6.17551	-0.450622	-2.30052	-1.77316	-1.87006	-9.01111	-6.27909	-4.91541	-0.973914	-0.989669	-0.628052	-2.25735	-1.99079	-2.3029	-12.4585	-7.34314	-4.88583	-0.599168
232.7	-1.33301	-1.33409	-1.41552	-8.30608	-6.27177	-5.17702	-1.15988	-0.72177	-0.664584	-1.63221	-1.53798	-1.2967	-6.40474	-6.53632	-6.75937	-0.67078	-0.608272	-0.768287	-1.70081	-1.73362	-1.70336	-8.65615	-8.1699	-7.80751	-1.00458	-0.796874	-1.62772	-1.89826	-5.83457	-0.442298	-1.44441	-6.23444	-0.515717	-2.2882	-1.77118	-1.87537	-9.04406	-6.33278	-4.98886	-0.964076	-1.02115	-0.672491	-2.28053	-2.00976	-2.31452	-12.5212	-7.41765	-4.92039	-0.607866
232.6	-1.34861	-1.35597	-1.43266	-8.43703	-6.33228	-5.18261	-1.1489	-0.692203	-0.652771	-1.64574	-1.52974	-1.2967	-6.47225	-6.59613	-6.79842	-0.709585	-0.578156	-0.777353	-1.70217	-1.76755	-1.7416	-8.75176	-8.24412	-7.84187	-0.978285	-0.812867	-1.63226	-1.90771	-5.87692	-0.444608	-1.44608	-6.30429	-0.504699	-2.28625	-1.77925	-1.89146	-9.10737	-6.35572	-5.04687	-0.931349	-1.01426	-0.684877	-2.26597	-2.01669	-2.31671	-12.6627	-7.44282	-4.98434	-0.605881
232.5	-1.40132	-1.41113	-1.4875	-8.52919	-6.38044	-5.27011	-1.16639	-0.702587	-0.669914	-1.72006	-1.58036	-1.26646	-6.55546	-6.66255	-6.92714	-0.763768	-0.605351	-0.802946	-1.70364	-1.73568	-1.81152	-8.84844	-8.29739	-7.95424	-1.01772	-0.859856	-1.70436	-1.91042	-5.91356	-0.510958	-1.47791	-6.36847	-0.515612	-2.28239	-1.79964	-1.90135	-9.15684	-6.38969	-5.15774	-0.90897	-1.01104	-0.690669	-2.32851	-2.01683	-2.32062	-12.7236	-7.51781	-4.98496	-0.615966
232.4	-1.42804	-1.36156	-1.49956	-8.63541	-6.41884	-5.34009	-1.21393	-0.687056	-0.656967	-1.73647	-1.57293	-1.30009	-6.6571	-6.73994	-6.96212	-0.762397	-0.621236	-0.817179	-1.72091	-1.71001	-1.83474	-8.89386	-8.33371	-7.98331	-1.02692	-0.867937	-1.70301	-1.93764	-5.95688	-0.524254	-1.51483	-6.43161	-0.54607	-2.27085	-1.79403	-1.87851	-9.22522	-6.42949	-5.17357	-0.990312	-1.01335	-0.663342	-2.34931	-2.05791	-2.3207	-12.7846	-7.60284	-5.05308	-0.613689
232.3	-1.41069	-1.36044	-1.51136	-8.71774	-6.52951	-5.35666	-1.19985	-0.68701	-0.655317	-1.74517	-1.60725	-1.3377	-6.72421	-6.85573	-7.0867	-0.783478	-0.64453	-0.835729	-1.7567	-1.7264	-1.8647	-8.95427	-8.38768	-8.05905	-1.01531	-0.849377	-1.70728	-1.97022	-6.00344	-0.544402	-1.4809	-6.44994	-0.574593	-2.26037	-1.79053	-1.8791	-9.27615	-6.493	-5.22479	-0.996875	-1.05077	-0.651432	-2.3448	-2.08037	-2.31474	-12.8451	-7.64477	-5.09176	-0.627249
232.2	-1.45022	-1.33842	-1.49092	-8.7796	-6.6089	-5.39773	-1.23035	-0.678994	-0.676422	-1.76923	-1.61339	-1.38591	-6.79128	-6.95395	-7.18704	-0.767525	-0.64667	-0.826432	-1.8015	-1.81688	-1.88597	-8.98744	-8.415	-8.12291	-0.993465	-0.830302	-1.68243	-1.96409	-6.0769	-0.568962	-1.47604	-6.5371	-0.522046	-2.29836	-1.82103	-1.9193	-9.38713	-6.55814	-5.25426	-0.979609	-1.09776	-0.621408	-2.35969	-2.07432	-2.25239	-12.9539	-7.70601	-5.19871	-0.631318
232.1	-1.49885	-1.30188	-1.48137	-8.81924	-6.68415	-5.44217	-1.24787	-0.665406	-0.680515	-1.80033	-1.57976	-1.41213	-6.87624	-7.02173	-7.26134	-0.800968	-0.614901	-0.831092	-1.81607	-1.76292	-1.87138	-9.03846	-8.44719	-8.13822	-1.02435	-0.853055	-1.71434	-2.00337	-6.10745	-0.564567	-1.46835	-6.59547	-0.512642	-2.28238	-1.80056	-1.95251	-9.48735	-6.62605	-5.28071	-0.967314	-1.1295	-0.645899	-2.3911	-2.08545	-2.2436	-13.0527	-7.81198	-5.25076	-0.64873
232	-1.50231	-1.36845	-1.5038	-8.99637	-6.81984	-5.5412	-1.2448	-0.618537	-0.724909	-1.86901	-1.59999	-1.48704	-6.95444	-7.07193	-7.32595	-0.844431	-0.602844	-0.828907	-1.82152	-1.81316	-1.89935	-9.11523	-8.53202	-8.24117	-1.01088	-0.863941	-1.74147	-1.96279	-6.16087	-0.525757	-1.45176	-6.7137	-0.534094	-2.26868	-1.77413	-2.00463	-9.56419	-6.67673	-5.31115	-0.983675	-1.14481	-0.672076	-2.43041	-2.12503	-2.27488	-13.0989	-7.91605	-5.34027	-0.647326
231.9	-1.52708	-1.45799	-1.53503	-9.14494	-7.00332	-5.61127	-1.22149	-0.603844	-0.726842	-1.84003	-1.60786	-1.50069	-7.05816	-7.14378	-7.46316	-0.86502	-0.651105	-0.823729	-1.84854	-1.82512	-1.88637	-9.19087	-8.63852	-8.36073	-1.05418	-0.863153	-1.71586	-1.9627	-6.23684	-0.560662	-1.44084	-6.81293	-0.575114	-2.34451	-1.77679	-2.03224	-9.64264	-6.74131	-5.38395	-0.972996	-1.14667	-0.677262	-2.453	-2.17449	-2.2711	-13.2177	-8.00882	-5.38625	-0.60247
231.8	-1.5382	-1.50361	-1.59205	-9.19395	-7.12719	-5.70469	-1.22249	-0.653523	-0.711778	-1.81759	-1.60858	-1.57053	-7.15306	-7.23161	-7.60057	-0.919284	-0.625586	-0.813043	-1.89311	-1.86867	-1.9028	-9.23742	-8.70803	-8.40307	-1.04794	-0.870223	-1.7319	-1.98926	-6.33459	-0.56009	-1.45794	-6.79523	-0.547257	-2.37968	-1.80597	-2.06467	-9.79169	-6.82832	-5.43475	-0.996639	-1.14222	-0.685509	-2.49983	-2.18866	-2.2642	-13.3342	-8.07049	-5.43583	-0.670798
231.7	-1.53702	-1.50959	-1.65337	-9.25495	-7.23016	-5.80168	-1.25243	-0.642053	-0.671926	-1.81804	-1.65705	-1.59342	-7.23584	-7.33424	-7.67118	-0.829879	-0.615463	-0.84333	-1.90885	-1.87439	-1.93443	-9.27757	-8.80405	-8.49326	-1.1085	-0.901461	-1.77193	-1.97417	-6.41304	-0.510399	-1.48734	-6.89477	-0.547942	-2.41136	-1.8253	-2.05835	-9.92191	-6.91612	-5.47207	-1.03659	-1.1613	-0.678472	-2.55253	-2.21485	-2.29666	-13.4805	-8.13397	-5.47336	-0.671248
231.6	-1.51998	-1.56347	-1.72124	-9.38015	-7.32241	-5.8947	-1.27129	-0.671413	-0.613331	-1.87721	-1.69254	-1.62549	-7.36924	-7.42046	-7.75402	-0.87342	-0.641875	-0.852543	-1.85775	-1.95053	-1.95349	-9.3607	-8.84959	-8.54287	-1.08782	-0.917352	-1.76139	-1.97907	-6.48336	-0.522892	-1.49737	-6.99622	-0.527461	-2.44247	-1.86824	-2.0648	-10.0053	-6.97603	-5.53469	-1.03243	-1.17595	-0.685501	-2.5934	-2.20921	-2.35064	-13.5628	-8.19929	-5.48445	-0.638354
231.5	-1.51791	-1.61302	-1.76996	-9.40189	-7.36538	-5.95667	-1.29039	-0.710712	-0.654854	-1.88044	-1.69008	-1.66133	-7.48566	-7.54886	-7.90991	-0.873163	-0.665752	-0.834171	-1.86632	-1.98392	-2.01372	-9.48326	-8.92432	-8.57394	-1.1066	-0.946291	-1.73687	-1.98527	-6.56907	-0.533332	-1.49247	-7.04248	-0.569063	-2.40733	-1.94122	-2.09462	-10.106	-7.01547	-5.60117	-1.04809	-1.16585	-0.688934	-2.66522	-2.21574	-2.38492	-13.6306	-8.28367	-5.59025	-0.63642
231.4	-1.55081	-1.60758	-1.79959	-9.53006	-7.4312	-6.04134	-1.35868	-0.656725	-0.605842	-1.94654	-1.68793	-1.71239	-7.50513	-7.56453	-7.95812	-0.898548	-0.738232	-0.833486	-1.8051	-1.96254	-2.02184	-9.57962	-9.03579	-8.69271	-1.10332	-0.961969	-1.76025	-1.97503	-6.65999	-0.516811	-1.47813	-7.15836	-0.599294	-2.45916	-2.01848	-2.11892	-10.2077	-7.12024	-5.65376	-1.06475	-1.16632	-0.742065	-2.69177	-2.25647	-2.32902	-13.7625	-8.36399	-5.632	-0.663325
231.3	-1.56963	-1.66386	-1.80426	-9.61788	-7.51673	-6.13665	-1.36317	-0.712971	-0.615588	-1.957	-1.68824	-1.80179	-7.55502	-7.68729	-8.01219	-0.91437	-0.771035	-0.8747	-1.83408	-1.93494	-2.06357	-9.6873	-9.09762	-8.71634	-1.12632	-0.96628	-1.77396	-2.04412	-6.69445	-0.474139	-1.50821	-7.22143	-0.652461	-2.40414	-2.07372	-2.14964	-10.3367	-7.19414	-5.66212	-1.12119	-1.16872	-0.738056	-2.61828	-2.27391	-2.3633	-13.8639	-8.36555	-5.66416	-0.669684
231.2	-1.59293	-1.70989	-1.80554	-9.70498	-7.62794	-6.24822	-1.35605	-0.67855	-0.571977	-1.89202	-1.6962	-1.80755	-7.66142	-7.74376	-8.11664	-0.922702	-0.761024	-0.855932	-1.84532	-1.94087	-2.0692	-9.76575	-9.21777	-8.7938	-1.13961	-0.992832	-1.77688	-2.0747	-6.71913	-0.519879	-1.54278	-7.29933	-0.676334	-2.37392	-2.13567	-2.15902	-10.454	-7.2429	-5.71656	-1.13119	-1.21751	-0.686741	-2.65958	-2.29885	-2.45001	-13.9521	-8.501	-5.74351	-0.656118
231.1	-1.58473	-1.70551	-1.78466	-9.69223	-7.78266	-6.31146	-1.39991	-0.650265	-0.553561	-1.98944	-1.72451	-1.86731	-7.79706	-7.80034	-8.14979	-0.906444	-0.789132	-0.893933	-1.88361	-1.92407	-2.09445	-9.91222	-9.27179	-8.84311	-1.18778	-1.04503	-1.78209	-2.08524	-6.78171	-0.619512	-1.58636	-7.30306	-0.677962	-2.38072	-2.25476	-2.15143	-10.563	-7.31926	-5.70202	-1.13884	-1.26551	-0.699503	-2.72081	-2.36636	-2.48758	-14.1095	-8.54147	-5.82628	-0.667725
231	-1.62876	-1.6849	-1.78599	-9.76111	-7.85262	-6.45537	-1.45719	-0.696	-0.610142	-2.01804	-1.66125	-1.85536	-7.91767	-7.8514	-8.28543	-0.920689	-0.778374	-0.941211	-1.97559	-1.98384	-2.07374	-9.95922	-9.28666	-8.92857	-1.2177	-1.08715	-1.74257	-2.13657	-6.88008	-0.611986	-1.567	-7.42614	-0.699992	-2.34873	-2.34278	-2.16067	-10.6371	-7.36009	-5.73386	-1.14818	-1.2771	-0.690356	-2.73604	-2.38688	-2.48428	-14.2543	-8.68577	-5.88799	-0.703382
230.9	-1.62515	-1.68032	-1.77776	-9.93467	-7.97378	-6.55262	-1.49094	-0.720562	-0.667894	-2.01703	-1.62166	-1.88378	-7.9611	-7.92635	-8.34797	-0.969985	-0.765324	-0.919603	-2.02005	-2.01234	-2.10629	-10.0095	-9.42578	-8.96796	-1.20775	-1.06844	-1.75405	-2.16148	-6.98649	-0.608746	-1.60549	-7.50168	-0.737214	-2.34434	-2.39645	-2.15809	-10.7085	-7.49038	-5.76943	-1.18057	-1.31186	-0.779785	-2.78129	-2.42458	-2.51635	-14.353	-8.79334	-5.93544	-0.679637
230.8	-1.65302	-1.69952	-1.7883	-10.1223	-8.07846	-6.56665	-1.4756	-0.781617	-0.666527	-1.99936	-1.63465	-1.94521	-8.06706	-8.0652	-8.39156	-0.912799	-0.743116	-0.932697	-2.04206	-2.04714	-2.15556	-10.0788	-9.50476	-9.00984	-1.22103	-1.09608	-1.75952	-2.13391	-7.12507	-0.589594	-1.62155	-7.59403	-0.741525	-2.35099	-2.46222	-2.16166	-10.751	-7.56338	-5.79482	-1.18345	-1.28033	-0.73785	-2.79645	-2.45976	-2.5314	-14.4103	-8.84358	-5.99051	-0.649735
230.7	-1.67767	-1.69877	-1.79496	-10.2044	-8.21337	-6.64572	-1.48128	-0.76709	-0.691057	-2.02648	-1.62486	-1.98926	-8.16166	-8.16254	-8.43253	-0.954306	-0.752833	-0.973084	-2.04571	-2.05693	-2.13589	-10.1432	-9.5286	-9.0067	-1.24127	-1.0961	-1.74923	-2.17538	-7.18108	-0.583546	-1.62126	-7.65169	-0.728164	-2.41342	-2.48844	-2.18271	-10.8012	-7.61674	-5.84102	-1.15301	-1.27028	-0.670262	-2.84013	-2.49091	-2.56897	-14.5622	-8.87364	-6.05488	-0.64084
230.6	-1.7267	-1.74804	-1.76357	-10.3235	-8.29718	-6.71869	-1.50287	-0.696619	-0.711006	-2.02673	-1.6562	-1.98302	-8.27296	-8.21714	-8.53767	-0.90058	-0.768409	-0.972274	-2.10256	-2.11268	-2.17895	-10.2119	-9.56652	-8.97113	-1.2998	-1.04513	-1.79116	-2.21152	-7.17368	-0.602854	-1.64174	-7.72475	-0.768703	-2.4905	-2.50425	-2.1761	-10.9295	-7.71653	-5.87108	-1.12417	-1.28003	-0.649394	-2.84147	-2.50172	-2.55008	-14.6953	-8.96996	-6.16978	-0.61392
230.5	-1.75689	-1.77512	-1.807	-10.4885	-8.48398	-6.84425	-1.4915	-0.717044	-0.698502	-2.01319	-1.70632	-1.97349	-8.39075	-8.33691	-8.65127	-0.947901	-0.6951	-1.05108	-2.07931	-2.13538	-2.23888	-10.3024	-9.66225	-9.05684	-1.30959	-1.0202	-1.80257	-2.19989	-7.2707	-0.59741	-1.75444	-7.84827	-0.769518	-2.49146	-2.53798	-2.17605	-11.0814	-7.76942	-5.8947	-1.14769	-1.25553	-0.6765	-2.89967	-2.51199	-2.58243	-14.8643	-8.99472	-6.18604	-0.608705
230.4	-1.72063	-1.77706	-1.79919	-10.6304	-8.58966	-6.91605	-1.47624	-0.734813	-0.721437	-2.05264	-1.70355	-1.93522	-8.4726	-8.42503	-8.74605	-0.888098	-0.68805	-1.07423	-2.06201	-2.10137	-2.3149	-10.4367	-9.69673	-9.16962	-1.36612	-1.03356	-1.76913	-2.22385	-7.33349	-0.612116	-1.78918	-7.91771	-0.771694	-2.50578	-2.55307	-2.20558	-11.1778	-7.85055	-5.92272	-1.04866	-1.28467	-0.708526	-2.89352	-2.55406	-2.57909	-14.9751	-9.00097	-6.25709	-0.596183
230.3	-1.71374	-1.78799	-1.8044	-10.7156	-8.70738	-7.03259	-1.52198	-0.720394	-0.740406	-2.0788	-1.73133	-2.00643	-8.52821	-8.47023	-8.80164	-0.898107	-0.663353	-1.07843	-2.08558	-2.1304	-2.42242	-10.5867	-9.77312	-9.26815	-1.3241	-1.04798	-1.75821	-2.24051	-7.4017	-0.620331	-1.75824	-8.01602	-0.795239	-2.5069	-2.60531	-2.23805	-11.3327	-7.87618	-5.93423	-1.05103	-1.28342	-0.762607	-2.88093	-2.6143	-2.60099	-15.0736	-9.08152	-6.34486	-0.681833
230.2	-1.72665	-1.78351	-1.78663	-10.7662	-8.80246	-7.11479	-1.53562	-0.752986	-0.739058	-2.10147	-1.74669	-2.04095	-8.64689	-8.55216	-8.83346	-0.938937	-0.695473	-1.06366	-2.06729	-2.18163	-2.39822	-10.6389	-9.8821	-9.36238	-1.36164	-1.03824	-1.75722	-2.23875	-7.44535	-0.614204	-1.78534	-8.0977	-0.797947	-2.49527	-2.60093	-2.2502	-11.4826	-7.95209	-5.94033	-1.07779	-1.32712	-0.752685	-2.87894	-2.62845	-2.63244	-15.1518	-9.19226	-6.37273	-0.709337
230.1	-1.75634	-1.80752	-1.78891	-10.8599	-8.8706	-7.21064	-1.49447	-0.726341	-0.775946	-2.1775	-1.78139	-2.06095	-8.72681	-8.66002	-8.92579	-0.962055	-0.732832	-0.99026	-2.06243	-2.16287	-2.44088	-10.7485	-9.98185	-9.45036	-1.3689	-1.00217	-1.74864	-2.28711	-7.48316	-0.590163	-1.84665	-8.16277	-0.801543	-2.48179	-2.63287	-2.25449	-11.6178	-7.99033	-5.994	-1.04721	-1.33035	-0.790045	-2.92125	-2.629	-2.67437	-15.2455	-9.19051	-6.44542	-0.703414
230	-1.77517	-1.76995	-1.77523	-10.9527	-8.94814	-7.26192	-1.53074	-0.752572	-0.749084	-2.28242	-1.80762	-2.10981	-8.84227	-8.77188	-9.0387	-0.941297	-0.713845	-0.98828	-2.07874	-2.19383	-2.47749	-10.8721	-9.99011	-9.49135	-1.3968	-1.00448	-1.7434	-2.31648	-7.47709	-0.651878	-1.83796	-8.23199	-0.770783	-2.47612	-2.63543	-2.27374	-11.6986	-8.10688	-6.06238	-1.06666	-1.29184	-0.879509	-2.9444	-2.61695	-2.70462	-15.342	-9.25244	-6.45479	-0.696919
229.9	-1.78478	-1.82657	-1.79748	-11.039	-9.03729	-7.33858	-1.53998	-0.716819	-0.732822	-2.31464	-1.78842	-2.19793	-8.90217	-8.81441	-9.08209	-0.961915	-0.690135	-1.00981	-2.09587	-2.21123	-2.53565	-10.8859	-10.0942	-9.552	-1.38366	-0.991553	-1.74374	-2.34943	-7.5161	-0.703909	-1.86156	-8.28858	-0.760523	-2.50212	-2.67237	-2.26294	-11.7671	-8.15881	-6.10972	-1.13729	-1.24725	-0.911421	-3.00047	-2.59061	-2.73009	-15.4476	-9.36073	-6.52998	-0.718468
229.8	-1.84931	-1.86414	-1.79645	-11.1443	-9.1718	-7.44506	-1.51755	-0.749476	-0.726637	-2.30774	-1.85841	-2.2696	-9.00549	-8.92332	-9.20916	-0.929833	-0.679349	-1.00756	-2.15033	-2.25779	-2.47765	-10.8975	-10.1576	-9.66584	-1.4258	-1.00632	-1.72898	-2.33646	-7.56812	-0.721703	-1.87838	-8.36018	-0.809911	-2.55475	-2.66423	-2.23239	-11.7904	-8.1815	-6.19056	-1.15849	-1.25669	-0.92847	-2.96897	-2.63297	-2.69747	-15.5397	-9.50656	-6.57594	-0.723917
229.7	-1.87515	-1.90649	-1.82686	-11.2536	-9.2729	-7.51031	-1.52136	-0.76266	-0.73599	-2.29268	-1.90601	-2.26653	-9.08602	-9.03769	-9.27451	-0.901004	-0.701974	-1.02724	-2.1726	-2.28332	-2.45363	-11.0019	-10.2061	-9.70991	-1.52684	-1.02525	-1.73346	-2.37008	-7.71615	-0.704368	-1.8652	-8.42987	-0.858702	-2.55384	-2.70988	-2.2808	-11.9722	-8.23758	-6.28512	-1.14754	-1.28711	-0.914542	-2.94717	-2.7052	-2.665	-15.6528	-9.66426	-6.61615	-0.736762
229.6	-1.9029	-1.97101	-1.82548	-11.3346	-9.37866	-7.58833	-1.54237	-0.809493	-0.725059	-2.2936	-1.93901	-2.25802	-9.07622	-9.1375	-9.35495	-0.915084	-0.725413	-1.05169	-2.22491	-2.364	-2.48417	-11.0331	-10.279	-9.86048	-1.45288	-1.05727	-1.78334	-2.33727	-7.77232	-0.729721	-1.93707	-8.5623	-0.918169	-2.53891	-2.70919	-2.35579	-12.0266	-8.2958	-6.30638	-1.16831	-1.22276	-0.893612	-2.99677	-2.70736	-2.62739	-15.6843	-9.69529	-6.62345	-0.783291
229.5	-1.91471	-2.007	-1.81115	-11.474	-9.48659	-7.58611	-1.56704	-0.810995	-0.73232	-2.29518	-1.97278	-2.29135	-9.17635	-9.18174	-9.46915	-0.903658	-0.753999	-1.08143	-2.19316	-2.42261	-2.48383	-11.1412	-10.2999	-9.87807	-1.50191	-1.0836	-1.81747	-2.34548	-7.83007	-0.792321	-1.95591	-8.70514	-0.941344	-2.56223	-2.74701	-2.37166	-12.1412	-8.37372	-6.29892	-1.20503	-1.18109	-0.893212	-3.05782	-2.70151	-2.62971	-15.8192	-9.82256	-6.67311	-0.789773
229.4	-1.89471	-2.05146	-1.81468	-11.5984	-9.52076	-7.6591	-1.63131	-0.847787	-0.773793	-2.33016	-1.96908	-2.33879	-9.27398	-9.26083	-9.5073	-0.930077	-0.813113	-1.09741	-2.23188	-2.41839	-2.49545	-11.2261	-10.4189	-9.96138	-1.48569	-1.11155	-1.84407	-2.30972	-7.93505	-0.81423	-1.9674	-8.78664	-0.96796	-2.59311	-2.78485	-2.44321	-12.1644	-8.44807	-6.3461	-1.17275	-1.18448	-0.891074	-3.10162	-2.72885	-2.69488	-15.9415	-9.97402	-6.65178	-0.752657
229.3	-1.86155	-2.15265	-1.78474	-11.7121	-9.64498	-7.76246	-1.57657	-0.883841	-0.796157	-2.34374	-2.00616	-2.33444	-9.40744	-9.35445	-9.62682	-0.970352	-0.770732	-1.10275	-2.26277	-2.40996	-2.49069	-11.3625	-10.465	-10.0724	-1.52281	-1.14577	-1.832	-2.35409	-7.99211	-0.840184	-2.02771	-8.86067	-0.988526	-2.58948	-2.79039	-2.51162	-12.2254	-8.53314	-6.33011	-1.16615	-1.14099	-0.881646	-3.01709	-2.76395	-2.71018	-16.0905	-10.0278	-6.73546	-0.759445
229.2	-1.90841	-2.12529	-1.80173	-11.7815	-9.77639	-7.8902	-1.61112	-0.924483	-0.842999	-2.32579	-2.03268	-2.35019	-9.47228	-9.47625	-9.69404	-0.934547	-0.786491	-1.0671	-2.29334	-2.46064	-2.51386	-11.3661	-10.5708	-10.1297	-1.53572	-1.17345	-1.85119	-2.3651	-8.03556	-0.835412	-2.11421	-8.92509	-0.971663	-2.60323	-2.81832	-2.57587	-12.3975	-8.59722	-6.32446	-1.18958	-1.23354	-0.893153	-3.07476	-2.78034	-2.71055	-16.1953	-10.0878	-6.74749	-0.757053
229.1	-1.9255	-2.12044	-1.81783	-11.874	-9.80523	-7.93288	-1.59612	-0.95185	-0.83394	-2.26179	-2.08295	-2.38041	-9.50248	-9.54836	-9.76324	-0.966523	-0.803011	-1.07541	-2.33749	-2.47698	-2.52002	-11.432	-10.6055	-10.1977	-1.53281	-1.17347	-1.8782	-2.368	-8.06592	-0.80367	-2.09939	-8.95556	-0.966008	-2.6306	-2.82866	-2.61401	-12.4703	-8.64333	-6.25969	-1.22573	-1.23584	-0.897667	-3.07614	-2.80242	-2.7057	-16.2935	-10.1244	-6.85435	-0.798169
229	-1.92868	-2.16794	-1.83967	-11.9953	-9.9358	-7.98679	-1.60815	-0.960881	-0.850414	-2.27921	-2.08852	-2.39304	-9.49207	-9.58696	-9.85306	-0.952912	-0.789518	-1.08538	-2.36788	-2.53261	-2.52705	-11.5103	-10.7382	-10.2961	-1.53158	-1.20353	-1.87913	-2.35339	-8.14049	-0.809327	-2.08077	-9.03108	-0.983262	-2.6875	-2.9003	-2.67562	-12.5783	-8.72784	-6.27779	-1.18421	-1.23401	-0.924381	-3.0409	-2.78598	-2.75138	-16.4083	-10.2026	-6.8705	-0.832404
228.9	-1.99214	-2.24112	-1.8258	-12.0704	-10.0509	-8.06902	-1.60145	-0.989581	-0.843187	-2.28245	-2.10145	-2.40153	-9.57364	-9.63165	-9.90321	-0.97322	-0.784316	-1.01734	-2.39469	-2.50975	-2.53775	-11.5948	-10.798	-10.2976	-1.50453	-1.21208	-1.93011	-2.37971	-8.22201	-0.794536	-2.14728	-9.13811	-0.981357	-2.76758	-2.91225	-2.73709	-12.7345	-8.73958	-6.28479	-1.17954	-1.19488	-0.951437	-3.02331	-2.80678	-2.80394	-16.4963	-10.2667	-6.93695	-0.866506
228.8	-2.00354	-2.30091	-1.8695	-12.1945	-10.1099	-8.16329	-1.62233	-1.01494	-0.85986	-2.29505	-2.13504	-2.36142	-9.58857	-9.68704	-9.97279	-0.965882	-0.76819	-1.0455	-2.41795	-2.55737	-2.55981	-11.7314	-10.8566	-10.324	-1.50253	-1.2231	-1.97345	-2.39514	-8.30214	-0.797396	-2.21522	-9.24064	-0.961532	-2.77191	-2.93414	-2.70901	-12.8561	-8.7742	-6.35186	-1.18969	-1.12967	-0.97263	-3.05607	-2.86166	-2.88763	-16.5891	-10.2748	-7.00601	-0.843961
228.7	-1.96873	-2.27508	-1.9583	-12.2972	-10.1742	-8.25712	-1.58366	-1.03606	-0.889694	-2.25166	-2.1471	-2.37262	-9.68319	-9.79506	-10.0513	-0.927887	-0.821209	-1.06356	-2.39325	-2.61837	-2.55412	-11.8261	-10.9907	-10.4268	-1.5109	-1.24065	-1.98254	-2.42031	-8.40129	-0.878514	-2.24354	-9.28381	-0.95972	-2.79473	-2.94343	-2.68486	-12.968	-8.85076	-6.37657	-1.12291	-1.16309	-0.94628	-3.0877	-2.87495	-2.87292	-16.6725	-10.3608	-7.03331	-0.833002
228.6	-1.96549	-2.23582	-1.98684	-12.3415	-10.2533	-8.29252	-1.59572	-1.05157	-0.851087	-2.26154	-2.16115	-2.41031	-9.7441	-9.82175	-10.1859	-0.939409	-0.812383	-1.07928	-2.36173	-2.65434	-2.52802	-11.8986	-11.0805	-10.5292	-1.53241	-1.26799	-2.00327	-2.44919	-8.39817	-0.912177	-2.31919	-9.35224	-0.96197	-2.83952	-2.91608	-2.68253	-13.1258	-8.9076	-6.39893	-1.19331	-1.12237	-0.939402	-3.1446	-2.88148	-2.8872	-16.8397	-10.3895	-7.088	-0.884016
228.5	-1.95422	-2.21817	-1.96953	-12.4754	-10.2689	-8.39787	-1.63563	-1.11536	-0.845177	-2.25702	-2.18143	-2.39733	-9.81151	-9.91377	-10.2098	-0.866134	-0.818151	-1.1093	-2.41802	-2.62217	-2.53007	-11.9371	-11.1427	-10.6128	-1.54671	-1.29149	-2.06254	-2.53115	-8.4319	-0.933212	-2.29526	-9.46203	-0.971113	-2.83317	-2.95422	-2.69278	-13.2223	-8.91788	-6.42121	-1.20384	-1.08316	-0.970538	-3.15327	-2.91693	-2.93049	-17.0005	-10.4601	-7.15723	-0.867533
228.4	-2.01066	-2.25516	-1.95345	-12.6064	-10.3458	-8.46323	-1.61974	-1.15174	-0.867701	-2.28363	-2.18281	-2.41081	-9.85624	-9.98999	-10.3159	-0.910982	-0.870769	-1.16763	-2.46238	-2.64626	-2.51209	-11.9848	-11.2375	-10.7121	-1.63042	-1.31865	-2.14355	-2.55091	-8.51925	-0.978191	-2.33379	-9.56787	-0.934019	-2.85538	-2.96897	-2.67864	-13.3161	-8.97937	-6.49502	-1.18742	-1.05688	-0.944632	-3.14937	-2.95635	-2.99938	-17.0951	-10.4924	-7.23772	-0.89582
228.3	-2.05819	-2.27377	-1.92906	-12.7173	-10.4513	-8.55106	-1.64025	-1.14613	-0.89476	-2.30023	-2.19008	-2.41096	-9.94695	-10.0815	-10.4343	-0.942271	-0.904331	-1.10499	-2.47643	-2.60837	-2.48617	-12.0053	-11.3282	-10.7081	-1.62376	-1.30699	-2.17608	-2.5666	-8.54861	-1.04174	-2.37653	-9.59145	-0.958735	-2.85392	-3.02053	-2.70901	-13.4725	-8.9917	-6.53541	-1.21542	-1.0343	-0.966072	-3.21408	-2.93517	-2.99657	-17.1249	-10.5617	-7.30897	-0.851659
228.2	-2.09417	-2.25353	-1.91737	-12.7675	-10.5785	-8.61248	-1.65982	-1.14415	-0.891566	-2.28785	-2.18368	-2.39698	-9.96945	-10.0949	-10.4897	-0.945015	-0.903945	-1.11338	-2.56777	-2.59235	-2.53957	-12.0447	-11.4029	-10.757	-1.6724	-1.32237	-2.21715	-2.58663	-8.5971	-1.10086	-2.38992	-9.61581	-0.959091	-2.87709	-3.02452	-2.74774	-13.5275	-9.09084	-6.60725	-1.17904	-1.03708	-0.994715	-3.24217	-2.95781	-2.97263	-17.2753	-10.6001	-7.40637	-0.906919
228.1	-2.15055	-2.26305	-1.93036	-12.8983	-10.7141	-8.71499	-1.67287	-1.14516	-0.912539	-2.31194	-2.21332	-2.43831	-10.0791	-10.1666	-10.5693	-0.947979	-0.919327	-1.12016	-2.5469	-2.57241	-2.55574	-12.1556	-11.4466	-10.7993	-1.6586	-1.31238	-2.23729	-2.62347	-8.62752	-1.08881	-2.43962	-9.66192	-0.976273	-2.9093	-2.99303	-2.72538	-13.5816	-9.20889	-6.63856	-1.18058	-1.03234	-0.973646	-3.19582	-2.98156	-2.97812	-17.4612	-10.6451	-7.46415	-0.964107
228	-2.13848	-2.31104	-1.94006	-12.9641	-10.825	-8.71673	-1.67712	-1.1616	-0.937384	-2.30329	-2.26476	-2.456	-10.1263	-10.2329	-10.6229	-0.982184	-0.931483	-1.12663	-2.61745	-2.62728	-2.61119	-12.1433	-11.4602	-10.8663	-1.69863	-1.34126	-2.24105	-2.61533	-8.73335	-1.17235	-2.43586	-9.79896	-0.948024	-2.92683	-3.02323	-2.76709	-13.6754	-9.21238	-6.69288	-1.20305	-0.996333	-1.00762	-3.31105	-3.03295	-3.05219	-17.5694	-10.7043	-7.54102	-0.95875
227.9	-2.20723	-2.28857	-1.95772	-13.0623	-10.9058	-8.77276	-1.69424	-1.17126	-0.968169	-2.34279	-2.30775	-2.42569	-10.1949	-10.2772	-10.7106	-0.971036	-0.940404	-1.10978	-2.60642	-2.64973	-2.61075	-12.1952	-11.5451	-10.9132	-1.66721	-1.29413	-2.27396	-2.60488	-8.80022	-1.2304	-2.47795	-9.83451	-0.922269	-2.95943	-2.96913	-2.77006	-13.7396	-9.27536	-6.73958	-1.24878	-1.01809	-1.05633	-3.32327	-3.07123	-3.08668	-17.6398	-10.8107	-7.59873	-0.939237
227.8	-2.21361	-2.2723	-1.9562	-13.1703	-10.9249	-8.75515	-1.72885	-1.20873	-1.02107	-2.33754	-2.33716	-2.46699	-10.2415	-10.3638	-10.7564	-1.00838	-0.966212	-1.13896	-2.66367	-2.69429	-2.64284	-12.226	-11.533	-10.9626	-1.68991	-1.29129	-2.26134	-2.59124	-8.85428	-1.21435	-2.43786	-9.93957	-0.947027	-3.05312	-2.93213	-2.84041	-13.7408	-9.35881	-6.74967	-1.23379	-0.967328	-1.11823	-3.29228	-3.06834	-3.07749	-17.6633	-10.9244	-7.65626	-0.954902
227.7	-2.23148	-2.3038	-2.00839	-13.3077	-10.9322	-8.81952	-1.71151	-1.2267	-1.04969	-2.31161	-2.38016	-2.43924	-10.2496	-10.426	-10.8566	-1.01118	-0.955945	-1.09523	-2.66034	-2.69062	-2.65307	-12.2283	-11.6146	-11.0363	-1.68188	-1.27555	-2.24861	-2.55364	-8.89483	-1.2561	-2.45362	-10.0158	-0.976487	-3.13847	-2.95848	-2.85034	-13.8527	-9.40733	-6.83659	-1.24815	-0.961256	-1.13868	-3.26088	-3.06289	-3.04817	-17.7031	-11.0011	-7.6774	-0.934555
227.6	-2.19925	-2.3199	-2.03911	-13.3895	-11.0334	-8.81458	-1.70698	-1.1864	-1.00151	-2.36497	-2.45063	-2.46551	-10.2433	-10.5162	-10.9012	-1.05474	-0.970301	-1.10853	-2.61927	-2.69719	-2.72056	-12.3745	-11.6232	-11.0626	-1.68119	-1.28355	-2.28002	-2.53119	-8.89747	-1.27938	-2.47263	-10.0034	-0.973009	-3.12451	-2.98549	-2.92753	-13.9494	-9.44837	-6.87303	-1.25802	-0.98951	-1.18417	-3.26099	-3.03203	-3.10803	-17.7473	-11.009	-7.72075	-0.930048
227.5	-2.18253	-2.31954	-2.05811	-13.3955	-11.0787	-8.83959	-1.69597	-1.16343	-1.00895	-2.39932	-2.45378	-2.47843	-10.3179	-10.5835	-11.0083	-1.00415	-0.972314	-1.0815	-2.62964	-2.6868	-2.69243	-12.4265	-11.674	-11.1238	-1.64217	-1.25668	-2.32135	-2.55457	-8.90753	-1.25759	-2.49905	-10.069	-1.02906	-3.12963	-2.96812	-2.94688	-14.0413	-9.47162	-6.9451	-1.28574	-1.00775	-1.1875	-3.29702	-3.0362	-3.10136	-17.8425	-11.082	-7.76501	-0.958966
227.4	-2.20444	-2.31608	-2.08261	-13.4496	-11.1248	-8.92889	-1.7039	-1.1888	-0.978921	-2.41733	-2.46514	-2.4848	-10.3316	-10.6931	-11.1422	-1.0428	-0.952576	-1.10572	-2.63803	-2.68429	-2.74283	-12.4499	-11.723	-11.1965	-1.63689	-1.2337	-2.33492	-2.59888	-8.90757	-1.32378	-2.50816	-10.1449	-1.01603	-3.14634	-2.9413	-2.95643	-14.1224	-9.53331	-7.0039	-1.30635	-1.07174	-1.18854	-3.30365	-3.07073	-3.13318	-17.9131	-11.1164	-7.77713	-1.02425
227.3	-2.2209	-2.31017	-2.11045	-13.5196	-11.1758	-8.92985	-1.74553	-1.18	-0.944574	-2.4256	-2.47407	-2.49804	-10.4118	-10.7797	-11.2132	-1.04909	-0.970861	-1.09504	-2.64819	-2.67165	-2.73397	-12.4701	-11.7717	-11.2622	-1.64929	-1.23716	-2.35497	-2.62303	-8.99783	-1.38135	-2.57	-10.2461	-0.979637	-3.23882	-2.99542	-2.93938	-14.2372	-9.62377	-7.07962	-1.37057	-1.05362	-1.26783	-3.32855	-3.05495	-3.15449	-17.9661	-11.1709	-7.75833	-1.04142
227.2	-2.27684	-2.36851	-2.10821	-13.5943	-11.245	-9.01573	-1.71416	-1.21112	-0.8799	-2.43253	-2.47091	-2.53827	-10.4109	-10.8566	-11.3344	-1.09031	-1.00598	-1.07036	-2.68973	-2.62884	-2.76988	-12.5478	-11.8223	-11.3988	-1.66482	-1.25488	-2.29228	-2.59446	-9.01736	-1.34713	-2.55199	-10.3432	-0.945504	-3.20113	-3.03351	-3.00883	-14.3367	-9.69037	-7.11141	-1.37103	-1.10213	-1.24061	-3.35831	-3.06577	-3.17094	-18.003	-11.2025	-7.77482	-1.0528
227.1	-2.29952	-2.3924	-2.08786	-13.6739	-11.2996	-9.09536	-1.76568	-1.18835	-0.923814	-2.49599	-2.50461	-2.59193	-10.4629	-10.9292	-11.427	-1.02253	-1.07584	-1.06681	-2.73858	-2.61022	-2.68975	-12.5968	-11.86	-11.4585	-1.67027	-1.26698	-2.23808	-2.64302	-9.09419	-1.38508	-2.56097	-10.3832	-0.929206	-3.24068	-3.05485	-3.03363	-14.437	-9.74941	-7.15927	-1.37236	-1.143	-1.21448	-3.37354	-3.1266	-3.14197	-17.9621	-11.3525	-7.79147	-1.09339
227	-2.34002	-2.43726	-2.16331	-13.6989	-11.3697	-9.1438	-1.76244	-1.19405	-0.906451	-2.52313	-2.5776	-2.57363	-10.4401	-10.9394	-11.5098	-1.06339	-1.06524	-1.09544	-2.77137	-2.72876	-2.65815	-12.5963	-11.9372	-11.4683	-1.67282	-1.23157	-2.32346	-2.69305	-9.15416	-1.38321	-2.52739	-10.5377	-0.951838	-3.2508	-3.07867	-3.03408	-14.4975	-9.78924	-7.18059	-1.40822	-1.14275	-1.24554	-3.34617	-3.20199	-3.21971	-18.0307	-11.3899	-7.83256	-1.14982
226.9	-2.40104	-2.45012	-2.16057	-13.8103	-11.4842	-9.18205	-1.75318	-1.2326	-0.911466	-2.55769	-2.52849	-2.56978	-10.4871	-10.9949	-11.5307	-1.07441	-1.12222	-1.07908	-2.78661	-2.79858	-2.69258	-12.5634	-12.0149	-11.5405	-1.70798	-1.22402	-2.30455	-2.68169	-9.20504	-1.41468	-2.55496	-10.5679	-0.973108	-3.27795	-3.07783	-3.02224	-14.4931	-9.84147	-7.23106	-1.3921	-1.11275	-1.24166	-3.37757	-3.16914	-3.18231	-18.1749	-11.4531	-7.85973	-1.13173
226.8	-2.44294	-2.50336	-2.18588	-13.9328	-11.5519	-9.23142	-1.79316	-1.25573	-0.862203	-2.56173	-2.61878	-2.62969	-10.5512	-11.0452	-11.6215	-1.07447	-1.12327	-1.06165	-2.77892	-2.80182	-2.75632	-12.6272	-12.0731	-11.6361	-1.70889	-1.27719	-2.36288	-2.74724	-9.2788	-1.42372	-2.58243	-10.6764	-0.995569	-3.33933	-3.07255	-3.08361	-14.5218	-9.92987	-7.2861	-1.41492	-1.08485	-1.30886	-3.42086	-3.17375	-3.14554	-18.2926	-11.4606	-7.94891	-1.13502
226.7	-2.49597	-2.50319	-2.19815	-13.9872	-11.628	-9.25165	-1.8144	-1.23894	-0.792652	-2.55521	-2.62556	-2.61269	-10.6332	-11.0649	-11.6616	-1.04735	-1.10052	-1.09796	-2.83348	-2.83142	-2.7479	-12.6328	-12.0819	-11.6714	-1.75527	-1.28763	-2.39704	-2.78668	-9.38579	-1.48226	-2.56563	-10.7705	-0.98066	-3.39713	-3.1037	-3.07433	-14.5676	-9.97315	-7.26885	-1.43219	-1.05959	-1.27988	-3.37463	-3.24235	-3.12362	-18.3496	-11.5858	-8.01537	-1.11654
226.6	-2.50023	-2.58435	-2.22876	-14.0807	-11.6589	-9.27296	-1.80104	-1.23643	-0.807465	-2.51862	-2.63591	-2.5872	-10.6343	-11.1554	-11.7145	-1.10612	-1.12198	-1.1348	-2.81972	-2.88756	-2.73664	-12.6443	-12.15	-11.7423	-1.7703	-1.26233	-2.44679	-2.83089	-9.39471	-1.39387	-2.56661	-10.8236	-1.02597	-3.39663	-3.15668	-3.09499	-14.6834	-9.97176	-7.28801	-1.39812	-1.13938	-1.25121	-3.29974	-3.23973	-3.12612	-18.4178	-11.6486	-8.05282	-1.15799
226.5	-2.49165	-2.57597	-2.28813	-14.2058	-11.6957	-9.28213	-1.79097	-1.24155	-0.868932	-2.48991	-2.69711	-2.5399	-10.6533	-11.189	-11.7613	-1.12327	-1.18184	-1.0881	-2.82756	-2.92719	-2.73259	-12.6851	-12.0999	-11.7777	-1.7785	-1.29266	-2.46022	-2.8012	-9.39762	-1.38765	-2.55467	-10.9432	-1.01555	-3.37649	-3.13054	-3.16219	-14.718	-10.0538	-7.27696	-1.37508	-1.20298	-1.20835	-3.2886	-3.32619	-3.14274	-18.4446	-11.6862	-8.03737	-1.14821
226.4	-2.49496	-2.57397	-2.29925	-14.2889	-11.7606	-9.3043	-1.83394	-1.21554	-0.867753	-2.52642	-2.6918	-2.53387	-10.6645	-11.1678	-11.7825	-1.17019	-1.19318	-1.07729	-2.83739	-2.93433	-2.781	-12.7613	-12.1055	-11.7501	-1.79904	-1.26898	-2.42515	-2.85776	-9.45373	-1.40176	-2.52895	-10.9733	-0.992434	-3.3453	-3.16127	-3.18285	-14.7959	-10.1458	-7.27422	-1.39486	-1.18121	-1.2123	-3.33604	-3.33739	-3.14705	-18.474	-11.6878	-8.08255	-1.1632
226.3	-2.50138	-2.59873	-2.29225	-14.3367	-11.8292	-9.33145	-1.87826	-1.1974	-0.853947	-2.5518	-2.69541	-2.52596	-10.6741	-11.2355	-11.8786	-1.16161	-1.21699	-1.11804	-2.8568	-3.00191	-2.83455	-12.7081	-12.2123	-11.8142	-1.77983	-1.27045	-2.39905	-2.86084	-9.44768	-1.42042	-2.58512	-10.9982	-0.950284	-3.37819	-3.21232	-3.20861	-14.8367	-10.1807	-7.30352	-1.40109	-1.17999	-1.2208	-3.3633	-3.34968	-3.23089	-18.4859	-11.6756	-8.11775	-1.1755
226.2	-2.50148	-2.55861	-2.27489	-14.4194	-11.9054	-9.40986	-1.89654	-1.20857	-0.870109	-2.60699	-2.64382	-2.59582	-10.7911	-11.3148	-11.8431	-1.21193	-1.21185	-1.10486	-2.87366	-3.00406	-2.81047	-12.7049	-12.2361	-11.8355	-1.84181	-1.23205	-2.34849	-2.88568	-9.48747	-1.48447	-2.55918	-11.0596	-0.965525	-3.45015	-3.24826	-3.21044	-14.881	-10.2331	-7.23217	-1.45211	-1.24468	-1.24187	-3.37712	-3.39771	-3.23246	-18.5613	-11.7774	-8.20799	-1.11013
226.1	-2.57303	-2.52507	-2.28666	-14.5062	-11.9161	-9.48028	-1.86799	-1.22085	-0.858577	-2.58935	-2.61504	-2.64004	-10.8365	-11.3922	-11.8869	-1.20853	-1.13427	-1.10008	-2.87355	-2.95759	-2.8508	-12.6867	-12.3304	-11.9093	-1.79977	-1.21316	-2.36207	-2.87811	-9.49	-1.47081	-2.61947	-11.0971	-0.993514	-3.43168	-3.23682	-3.2086	-14.981	-10.2762	-7.32547	-1.45384	-1.23888	-1.25226	-3.35375	-3.42477	-3.23677	-18.5535	-11.7711	-8.31032	-1.0915
226	-2.63278	-2.49947	-2.26808	-14.4961	-11.9826	-9.52108	-1.82608	-1.189	-0.873957	-2.63277	-2.62207	-2.63601	-10.8294	-11.4507	-11.9466	-1.21262	-1.12621	-1.0759	-2.87357	-2.95496	-2.88903	-12.726	-12.307	-11.9397	-1.79322	-1.20445	-2.3756	-2.92876	-9.52519	-1.4475	-2.6171	-11.0791	-0.980194	-3.46933	-3.18228	-3.21916	-15.0575	-10.2948	-7.32328	-1.45709	-1.309	-1.27213	-3.35736	-3.4407	-3.25903	-18.6143	-11.815	-8.3561	-1.16555
225.9	-2.65908	-2.47327	-2.34485	-14.5818	-12.0049	-9.57169	-1.85887	-1.23411	-0.831568	-2.63521	-2.61906	-2.66703	-10.8561	-11.4791	-11.8949	-1.2246	-1.18345	-1.0443	-2.88678	-2.93803	-2.91633	-12.653	-12.3313	-11.9136	-1.76693	-1.15884	-2.39438	-2.93778	-9.5892	-1.41478	-2.59532	-11.154	-0.999867	-3.50396	-3.1508	-3.20065	-15.1825	-10.289	-7.41957	-1.49154	-1.31114	-1.2774	-3.3744	-3.45209	-3.26074	-18.6634	-11.9055	-8.38906	-1.13947
225.8	-2.63316	-2.51031	-2.33123	-14.6851	-11.9729	-9.58058	-1.84946	-1.2119	-0.80745	-2.66324	-2.61826	-2.68782	-10.8889	-11.5462	-11.9204	-1.26462	-1.18355	-1.05165	-2.90005	-2.93325	-2.90288	-12.7102	-12.3294	-11.9322	-1.77844	-1.11637	-2.39092	-2.97616	-9.62835	-1.41123	-2.63729	-11.2294	-1.01333	-3.52145	-3.14099	-3.20967	-15.2428	-10.3416	-7.48286	-1.52824	-1.28185	-1.21048	-3.40631	-3.47269	-3.24242	-18.6586	-11.9756	-8.46439	-1.14686
225.7	-2.59794	-2.5635	-2.33132	-14.7222	-11.9668	-9.59332	-1.8813	-1.22695	-0.870642	-2.6971	-2.5113	-2.70686	-10.9217	-11.5777	-11.9607	-1.25963	-1.13646	-1.02554	-2.8807	-2.94816	-2.86821	-12.6876	-12.3641	-11.962	-1.80345	-1.1142	-2.33586	-2.99166	-9.66864	-1.46747	-2.68454	-11.337	-0.97961	-3.54413	-3.17152	-3.20915	-15.2747	-10.4173	-7.56665	-1.45564	-1.33001	-1.2186	-3.45814	-3.53253	-3.23852	-18.6931	-11.983	-8.40728	-1.09803
225.6	-2.60978	-2.56888	-2.38438	-14.7472	-11.9894	-9.63473	-1.87438	-1.20996	-0.823188	-2.70451	-2.55602	-2.71671	-11.0232	-11.7399	-11.9989	-1.24447	-1.17465	-1.07444	-2.88476	-2.97208	-2.82158	-12.6959	-12.3671	-12.0195	-1.80872	-1.09189	-2.33796	-2.99115	-9.72305	-1.46869	-2.68889	-11.3798	-0.969261	-3.55014	-3.23039	-3.16979	-15.2793	-10.3918	-7.61088	-1.50866	-1.36755	-1.17157	-3.48074	-3.53433	-3.26604	-18.802	-11.9982	-8.44717	-1.09716
225.5	-2.57152	-2.62519	-2.38555	-14.7801	-12.0971	-9.6559	-1.88905	-1.1999	-0.796249	-2.80109	-2.61953	-2.80408	-11.0628	-11.7818	-12.0954	-1.27695	-1.1945	-1.08737	-2.88661	-2.98196	-2.78836	-12.596	-12.4284	-12.1561	-1.84877	-1.16816	-2.32931	-2.98989	-9.72211	-1.50823	-2.67273	-11.4238	-1.00041	-3.50532	-3.28113	-3.19739	-15.3179	-10.4791	-7.68253	-1.5008	-1.37945	-1.1618	-3.54103	-3.57957	-3.23613	-18.7915	-12.1166	-8.48431	-1.08902
225.4	-2.59882	-2.62144	-2.35668	-14.8028	-12.1181	-9.70369	-1.89009	-1.20098	-0.811627	-2.84099	-2.67624	-2.8539	-11.1187	-11.7756	-12.0886	-1.30858	-1.21047	-1.04066	-2.89678	-3.00249	-2.82125	-12.6168	-12.4429	-12.1853	-1.88407	-1.14796	-2.33289	-3.02725	-9.67726	-1.52276	-2.66672	-11.5553	-0.992265	-3.52339	-3.29875	-3.24246	-15.3237	-10.4818	-7.6993	-1.54042	-1.41314	-1.18038	-3.55649	-3.58276	-3.27394	-18.8674	-12.174	-8.47578	-1.08552
225.3	-2.61537	-2.67842	-2.33945	-14.8553	-12.1756	-9.73806	-1.93251	-1.17121	-0.815081	-2.89122	-2.68732	-2.83666	-11.0904	-11.7899	-12.1518	-1.29805	-1.18917	-1.0625	-2.98145	-2.95571	-2.85778	-12.5602	-12.4573	-12.1577	-1.85658	-1.11735	-2.35144	-2.96899	-9.76108	-1.49777	-2.70517	-11.5736	-0.981049	-3.54057	-3.31433	-3.27817	-15.3895	-10.5607	-7.75132	-1.52382	-1.38513	-1.1901	-3.59307	-3.58178	-3.34106	-18.8855	-12.2454	-8.49551	-1.11959
225.2	-2.63828	-2.66902	-2.31434	-14.8771	-12.2452	-9.77262	-1.98467	-1.11733	-0.841622	-2.92938	-2.69778	-2.83992	-11.1281	-11.8539	-12.1691	-1.3535	-1.22523	-1.07232	-2.96326	-2.99925	-2.85717	-12.6109	-12.4408	-12.1568	-1.83821	-1.0969	-2.31844	-2.94352	-9.76687	-1.43075	-2.76952	-11.6822	-0.993418	-3.51749	-3.34923	-3.35521	-15.3849	-10.6481	-7.7724	-1.54697	-1.45879	-1.17167	-3.59359	-3.55323	-3.35377	-18.9164	-12.254	-8.52654	-1.16063
225.1	-2.70344	-2.6202	-2.34575	-14.8986	-12.3595	-9.75344	-1.96723	-1.10427	-0.876774	-2.96084	-2.71334	-2.87652	-11.2277	-11.8743	-12.2625	-1.42284	-1.21275	-1.08341	-3.00258	-2.96217	-2.9225	-12.6141	-12.431	-12.1142	-1.85195	-1.13427	-2.26669	-2.87462	-9.81203	-1.38172	-2.80989	-11.7495	-1.04154	-3.50008	-3.36841	-3.40602	-15.4586	-10.6181	-7.78623	-1.54952	-1.49071	-1.19179	-3.56764	-3.54312	-3.28676	-18.897	-12.3227	-8.48246	-1.14814
225	-2.72179	-2.63646	-2.35081	-14.9779	-12.375	-9.81019	-1.98748	-1.14359	-0.910828	-2.93803	-2.70982	-2.96776	-11.2451	-11.8785	-12.2653	-1.39291	-1.20115	-1.14423	-2.98535	-2.95707	-2.9666	-12.6536	-12.4256	-12.1657	-1.83604	-1.14785	-2.17515	-2.88449	-9.85443	-1.38188	-2.81907	-11.8494	-1.04245	-3.45341	-3.39813	-3.46093	-15.5594	-10.7305	-7.79324	-1.53931	-1.54907	-1.22257	-3.5516	-3.55204	-3.26043	-18.9071	-12.3864	-8.51039	-1.16155
224.9	-2.68508	-2.61935	-2.37079	-15.0605	-12.3887	-9.83359	-2.01036	-1.21792	-0.932395	-2.93932	-2.72098	-2.97039	-11.2708	-11.8825	-12.3234	-1.41856	-1.19835	-1.13985	-2.95932	-3.00296	-2.96518	-12.6513	-12.41	-12.2189	-1.80301	-1.15533	-2.17752	-2.90755	-9.84488	-1.30385	-2.84677	-11.917	-1.03966	-3.4606	-3.37149	-3.45155	-15.5219	-10.7586	-7.84292	-1.512	-1.53725	-1.23413	-3.52129	-3.61305	-3.23173	-18.9426	-12.3498	-8.52971	-1.15514
224.8	-2.63061	-2.64281	-2.39086	-15.075	-12.3685	-9.8419	-1.97938	-1.17972	-0.946598	-2.96119	-2.75512	-2.95533	-11.2832	-11.9213	-12.3204	-1.41689	-1.16882	-1.17894	-2.9887	-2.99453	-2.95176	-12.6736	-12.3976	-12.2168	-1.80776	-1.15875	-2.17742	-2.95645	-9.89216	-1.27021	-2.83942	-11.9517	-1.08368	-3.45992	-3.39828	-3.48588	-15.5213	-10.7761	-7.82456	-1.55075	-1.52871	-1.21562	-3.56372	-3.65046	-3.23115	-18.9371	-12.3623	-8.5688	-1.14187
224.7	-2.64239	-2.63627	-2.3742	-15.1218	-12.4034	-9.90964	-2.00537	-1.17378	-0.931802	-2.97991	-2.80663	-2.98883	-11.336	-11.9248	-12.3767	-1.43337	-1.18247	-1.18446	-3.00842	-3.04825	-2.94662	-12.6741	-12.4582	-12.1863	-1.82692	-1.16648	-2.15184	-2.90164	-9.89289	-1.2941	-2.89313	-11.9912	-1.0957	-3.49586	-3.39102	-3.47205	-15.6098	-10.823	-7.90367	-1.57388	-1.55826	-1.22407	-3.53191	-3.62848	-3.24458	-18.9347	-12.3901	-8.61156	-1.12801
224.6	-2.69552	-2.655	-2.38524	-15.0971	-12.472	-9.95393	-2.02752	-1.17957	-0.962305	-3.00765	-2.82991	-3.02515	-11.4268	-11.954	-12.4227	-1.46008	-1.18742	-1.19153	-2.98789	-2.9995	-2.90459	-12.6164	-12.5315	-12.1955	-1.82101	-1.14455	-2.14044	-2.91062	-9.92894	-1.23909	-2.91622	-11.9908	-1.095	-3.49031	-3.44648	-3.50218	-15.6661	-10.8068	-7.90777	-1.58715	-1.6293	-1.21583	-3.50727	-3.63492	-3.25257	-18.858	-12.4148	-8.64032	-1.14813
224.5	-2.64981	-2.65862	-2.37275	-15.116	-12.4994	-9.97817	-1.99105	-1.17965	-0.99524	-3.05366	-2.84145	-3.00425	-11.441	-11.9736	-12.4025	-1.44056	-1.18146	-1.17693	-3.01822	-3.01612	-2.89785	-12.6573	-12.55	-12.2691	-1.8449	-1.14128	-2.10911	-2.86321	-9.91729	-1.16708	-2.91763	-12.0128	-1.12274	-3.49898	-3.51748	-3.50312	-15.7355	-10.8292	-7.98409	-1.54321	-1.63934	-1.21695	-3.53663	-3.62626	-3.26725	-18.8902	-12.4084	-8.65381	-1.16507
224.4	-2.64703	-2.67803	-2.41336	-15.1749	-12.4977	-10.0245	-1.98726	-1.1686	-0.980639	-3.09905	-2.84307	-2.99905	-11.4976	-11.9933	-12.4274	-1.47764	-1.2036	-1.18388	-3.04157	-3.04687	-2.86001	-12.6952	-12.6483	-12.3075	-1.89157	-1.177	-2.14082	-2.91546	-9.99393	-1.11521	-2.93461	-12.0461	-1.09983	-3.46385	-3.55187	-3.46928	-15.8036	-10.8457	-8.05009	-1.53721	-1.66331	-1.16315	-3.52689	-3.60429	-3.24607	-18.9419	-12.3227	-8.65759	-1.20173
224.3	-2.67569	-2.73993	-2.47113	-15.1704	-12.5596	-10.1139	-1.98489	-1.18775	-0.914355	-3.0936	-2.88224	-3.02739	-11.5474	-12.05	-12.4473	-1.5112	-1.15549	-1.20696	-3.02502	-3.03869	-2.89361	-12.6606	-12.6633	-12.3196	-1.91806	-1.18535	-2.14122	-2.88703	-10.0125	-1.11906	-2.94405	-12.1163	-1.08133	-3.51561	-3.51909	-3.48694	-15.8221	-10.8966	-8.06258	-1.56542	-1.63724	-1.07229	-3.55803	-3.63864	-3.24109	-18.9149	-12.2979	-8.69509	-1.19116
224.2	-2.73125	-2.75094	-2.48885	-15.2206	-12.6043	-10.1707	-2.05596	-1.24438	-0.89226	-3.0955	-2.87366	-3.06436	-11.6487	-12.0255	-12.4553	-1.49525	-1.12217	-1.21979	-2.95897	-3.07481	-2.87451	-12.6	-12.7492	-12.385	-1.97148	-1.13831	-2.12617	-2.91679	-10.0909	-1.13228	-2.95022	-12.1646	-1.07987	-3.52598	-3.51667	-3.44683	-15.8677	-10.9006	-8.10356	-1.59908	-1.65038	-1.06674	-3.57136	-3.61959	-3.20918	-18.956	-12.3079	-8.67787	-1.14947
224.1	-2.74175	-2.72251	-2.5199	-15.2553	-12.6358	-10.1716	-2.0402	-1.24998	-0.887489	-3.06814	-2.95127	-3.0695	-11.7117	-12.0829	-12.4466	-1.49234	-1.15394	-1.23178	-2.94854	-3.05999	-2.93394	-12.5799	-12.7709	-12.3943	-2.00334	-1.19874	-2.08005	-2.98169	-10.0787	-1.13491	-2.96379	-12.2574	-1.03936	-3.52927	-3.53089	-3.49537	-15.8869	-10.9145	-8.06919	-1.58494	-1.64747	-1.03413	-3.5947	-3.62258	-3.2067	-18.9495	-12.3095	-8.76004	-1.13456
224	-2.76299	-2.73143	-2.56859	-15.3223	-12.6913	-10.1906	-1.98849	-1.20414	-0.907723	-3.12052	-2.93733	-3.06383	-11.7022	-12.0346	-12.4456	-1.48036	-1.19226	-1.22817	-3.04668	-3.08836	-2.88936	-12.56	-12.739	-12.417	-1.9983	-1.14245	-2.06829	-2.93887	-10.014	-1.15672	-2.89927	-12.2902	-1.04482	-3.52871	-3.52985	-3.51613	-15.9028	-10.9308	-8.07384	-1.59923	-1.6161	-1.10792	-3.63455	-3.64058	-3.20532	-18.9812	-12.2707	-8.78964	-1.11337
223.9	-2.73342	-2.78631	-2.57661	-15.3857	-12.7417	-10.259	-1.97305	-1.25215	-0.951528	-3.11802	-2.94403	-3.06433	-11.7704	-11.9503	-12.4944	-1.46063	-1.20163	-1.26976	-3.05878	-3.11961	-2.92276	-12.523	-12.8094	-12.4509	-1.97064	-1.14042	-2.15364	-2.94193	-9.95264	-1.22067	-2.92124	-12.2723	-1.11412	-3.48629	-3.57526	-3.5578	-15.9205	-10.9035	-8.11318	-1.52847	-1.6325	-1.12964	-3.61884	-3.63085	-3.15166	-19.007	-12.3115	-8.80237	-1.12692
223.8	-2.70191	-2.70645	-2.58166	-15.3899	-12.7765	-10.2386	-2.02314	-1.24785	-0.982917	-3.10497	-2.9015	-3.05587	-11.7499	-11.9531	-12.5382	-1.48036	-1.21531	-1.29348	-3.05356	-3.17476	-2.95847	-12.4627	-12.756	-12.3968	-1.93802	-1.13263	-2.13529	-2.92618	-10.0151	-1.24386	-2.92242	-12.2907	-1.13492	-3.4904	-3.50129	-3.56472	-15.9495	-10.9402	-8.15774	-1.51319	-1.5773	-1.10767	-3.64967	-3.62317	-3.20019	-19.0367	-12.3174	-8.8373	-1.088
223.7	-2.62507	-2.70977	-2.62252	-15.42	-12.8198	-10.2158	-2.05699	-1.24323	-1.03974	-3.16052	-2.88926	-3.08854	-11.8391	-11.9017	-12.5307	-1.49579	-1.24628	-1.27059	-2.98857	-3.16521	-2.99812	-12.4493	-12.7297	-12.3354	-1.98267	-1.17972	-2.10196	-2.96951	-9.98209	-1.20599	-2.99007	-12.2472	-1.18824	-3.4904	-3.4645	-3.58678	-16.0041	-11.0138	-8.18608	-1.54495	-1.55099	-1.15084	-3.69688	-3.61227	-3.2119	-19.1674	-12.3121	-8.84206	-1.04855
223.6	-2.51766	-2.70914	-2.56927	-15.4061	-12.8474	-10.2058	-2.06364	-1.2689	-1.05992	-3.11412	-2.855	-3.11445	-11.9023	-11.9637	-12.6448	-1.47704	-1.26086	-1.30018	-2.97308	-3.13022	-2.97545	-12.4329	-12.7143	-12.4353	-1.97834	-1.19704	-2.07786	-2.98008	-9.99931	-1.19253	-2.9937	-12.2599	-1.14738	-3.51969	-3.48633	-3.62205	-16.0319	-10.9858	-8.179	-1.57688	-1.57423	-1.14602	-3.67842	-3.60778	-3.18305	-19.1832	-12.2546	-8.83361	-1.05979
223.5	-2.56107	-2.70558	-2.59756	-15.4118	-12.8844	-10.2025	-2.03077	-1.23644	-1.07238	-3.14662	-2.8318	-3.14841	-11.9149	-11.9627	-12.7634	-1.47951	-1.20849	-1.27374	-3.07039	-3.11185	-2.95885	-12.4247	-12.695	-12.3584	-2.00443	-1.22371	-2.06763	-2.89912	-9.99061	-1.1676	-3.04767	-12.2345	-1.10436	-3.44499	-3.57042	-3.57485	-16.0806	-11.0141	-8.19199	-1.56995	-1.56548	-1.16449	-3.67543	-3.55239	-3.21402	-19.1728	-12.3125	-8.90649	-1.01258
223.4	-2.5087	-2.69427	-2.63166	-15.4626	-12.8574	-10.206	-2.04837	-1.18869	-1.077	-3.16331	-2.85469	-3.10543	-11.9388	-12.0379	-12.6819	-1.48743	-1.21472	-1.29973	-3.00933	-3.13432	-2.97436	-12.3617	-12.7293	-12.3323	-2.01341	-1.22304	-2.06498	-2.94017	-9.99493	-1.21039	-3.02343	-12.2971	-1.10779	-3.4478	-3.59902	-3.57218	-16.1226	-11.0223	-8.25287	-1.50504	-1.57695	-1.13949	-3.75289	-3.51896	-3.2385	-19.2435	-12.3064	-8.91306	-1.03492
223.3	-2.46545	-2.70538	-2.63334	-15.4708	-12.8832	-10.2819	-2.01638	-1.20852	-1.12791	-3.14736	-2.91917	-3.14436	-11.9541	-12.1049	-12.7062	-1.49802	-1.19826	-1.31276	-3.00084	-3.09631	-3.00997	-12.3043	-12.7635	-12.297	-1.9756	-1.23309	-2.10659	-2.93226	-10.0097	-1.23137	-3.06768	-12.3628	-1.11418	-3.42857	-3.53623	-3.60248	-16.1801	-11.0326	-8.30942	-1.50818	-1.59801	-1.15345	-3.8402	-3.53336	-3.2415	-19.2475	-12.2591	-8.99613	-1.0698
223.2	-2.52767	-2.66803	-2.61779	-15.4057	-12.9722	-10.3205	-2.08357	-1.15334	-1.09209	-3.13982	-2.86424	-3.13113	-11.9812	-12.0681	-12.7169	-1.44976	-1.2015	-1.34401	-3.03242	-3.0797	-3.06521	-12.3562	-12.7807	-12.3215	-1.9576	-1.1996	-2.1325	-2.96061	-9.9974	-1.29294	-3.10611	-12.3431	-1.12696	-3.42288	-3.55617	-3.60997	-16.1877	-11.0533	-8.29988	-1.52297	-1.55708	-1.13713	-3.79629	-3.55382	-3.23438	-19.209	-12.2764	-9.01955	-1.10239
223.1	-2.51332	-2.65152	-2.6465	-15.3857	-12.9753	-10.3357	-2.08349	-1.16053	-1.08557	-3.10776	-2.85095	-3.14746	-12.0051	-12.081	-12.764	-1.4523	-1.22944	-1.38631	-3.03437	-3.02754	-3.05169	-12.2939	-12.8187	-12.3013	-1.95803	-1.17802	-2.14247	-2.95935	-9.97759	-1.24188	-3.05816	-12.3541	-1.19124	-3.44568	-3.58374	-3.64771	-16.2962	-11.0997	-8.33561	-1.55352	-1.557	-1.18683	-3.72265	-3.49737	-3.25555	-19.2158	-12.2137	-9.01656	-1.04945
223	-2.51997	-2.62386	-2.63059	-15.3991	-12.9996	-10.3878	-2.06475	-1.17071	-1.12569	-3.09086	-2.86454	-3.12411	-12.0988	-12.1115	-12.783	-1.44531	-1.20921	-1.35331	-3.00643	-3.0304	-3.04485	-12.2746	-12.8308	-12.3167	-1.95542	-1.16003	-2.12273	-2.94982	-9.97704	-1.22677	-3.0596	-12.3856	-1.17053	-3.43947	-3.54282	-3.63742	-16.2928	-11.1025	-8.33256	-1.5462	-1.6065	-1.16734	-3.7114	-3.52227	-3.31146	-19.2752	-12.1873	-8.99273	-1.02667
222.9	-2.46085	-2.65581	-2.64397	-15.4681	-12.9895	-10.3644	-2.1083	-1.12231	-1.17158	-3.06922	-2.90109	-3.14797	-12.1436	-12.0847	-12.8159	-1.5208	-1.17271	-1.30761	-2.94252	-3.02208	-3.02786	-12.2877	-12.8393	-12.2825	-1.94278	-1.1586	-2.17389	-2.98884	-10.0344	-1.1789	-3.00934	-12.404	-1.16477	-3.48411	-3.51928	-3.59578	-16.3142	-11.1204	-8.42987	-1.57175	-1.62792	-1.12897	-3.68392	-3.44966	-3.32788	-19.2412	-12.2687	-9.0225	-1.03828
222.8	-2.49396	-2.65349	-2.71501	-15.4543	-12.9554	-10.3838	-2.07176	-1.1168	-1.20286	-3.06986	-2.93855	-3.16752	-12.1656	-12.0782	-12.8634	-1.49257	-1.19363	-1.33651	-2.94237	-3.02426	-3.05477	-12.2873	-12.8013	-12.2606	-1.91161	-1.08636	-2.19311	-3.0099	-10.0727	-1.09701	-3.02082	-12.411	-1.07491	-3.54496	-3.5103	-3.57199	-16.3463	-11.1203	-8.51677	-1.58396	-1.60539	-1.15704	-3.73018	-3.4277	-3.39192	-19.2274	-12.1912	-9.0366	-1.06233
222.7	-2.50248	-2.65595	-2.75584	-15.4633	-13.0454	-10.3605	-2.1323	-1.11145	-1.17968	-3.10008	-3.0329	-3.15967	-12.1105	-12.0595	-12.8514	-1.49453	-1.22104	-1.35253	-2.96876	-3.00024	-3.06102	-12.3302	-12.7289	-12.2436	-1.9467	-1.13106	-2.2093	-3.04066	-10.124	-1.1372	-3.04014	-12.502	-1.06943	-3.55745	-3.55191	-3.57454	-16.3061	-11.1195	-8.53878	-1.58119	-1.60998	-1.12645	-3.77083	-3.40899	-3.36461	-19.2915	-12.1963	-9.04495	-1.0638
222.6	-2.47158	-2.61753	-2.80448	-15.5168	-13.0232	-10.3663	-2.18773	-1.09207	-1.18599	-3.06849	-2.95735	-3.15977	-12.1322	-12.0566	-12.8433	-1.53609	-1.23588	-1.41395	-3.03645	-3.05115	-3.0524	-12.2861	-12.687	-12.2809	-1.97331	-1.13529	-2.26005	-3.0767	-10.1112	-1.18062	-3.02854	-12.5723	-1.0911	-3.54703	-3.58883	-3.58737	-16.3421	-11.1443	-8.54981	-1.55295	-1.52897	-1.12123	-3.86128	-3.42377	-3.41014	-19.3578	-12.1454	-9.04196	-1.11505
222.5	-2.42522	-2.60449	-2.74379	-15.4553	-13.0783	-10.3798	-2.20453	-1.11146	-1.2357	-3.05995	-2.98152	-3.14727	-12.1427	-12.0684	-12.9061	-1.52924	-1.23924	-1.42839	-3.00778	-3.11293	-3.05983	-12.2101	-12.7093	-12.2439	-2.00287	-1.13648	-2.22526	-3.02381	-10.1489	-1.18734	-2.98883	-12.5358	-1.14984	-3.58367	-3.62746	-3.59953	-16.3812	-11.136	-8.60704	-1.48207	-1.56462	-1.15329	-3.93239	-3.40233	-3.41968	-19.3787	-12.1357	-9.03581	-1.10694
222.4	-2.42102	-2.60607	-2.74639	-15.4248	-13.1847	-10.447	-2.1807	-1.13313	-1.29511	-3.10448	-3.02177	-3.07784	-12.1257	-12.0379	-12.9035	-1.51104	-1.25967	-1.46755	-3.03488	-3.11966	-3.08624	-12.2347	-12.6977	-12.2635	-2.07453	-1.17876	-2.28697	-3.02088	-10.1711	-1.15986	-2.97593	-12.5944	-1.20154	-3.56528	-3.64997	-3.58514	-16.4101	-11.1769	-8.57361	-1.48598	-1.53094	-1.18271	-3.87998	-3.42468	-3.45679	-19.3724	-12.1735	-9.05554	-1.0812
222.3	-2.43656	-2.52834	-2.71604	-15.4486	-13.2484	-10.4491	-2.1505	-1.08341	-1.28994	-3.06447	-3.06025	-3.08841	-12.156	-11.9882	-12.9701	-1.52749	-1.27616	-1.443	-3.03783	-3.09616	-3.1539	-12.1994	-12.6299	-12.2526	-2.03557	-1.15749	-2.3325	-3.025	-10.1422	-1.16388	-2.9341	-12.5808	-1.21409	-3.5816	-3.58263	-3.59089	-16.4723	-11.1704	-8.61616	-1.4492	-1.51421	-1.1792	-3.84908	-3.35519	-3.49013	-19.3595	-12.104	-9.08466	-1.12931
222.2	-2.48874	-2.50361	-2.68422	-15.4799	-13.2522	-10.496	-2.12393	-1.1393	-1.30061	-3.04139	-3.04103	-3.04027	-12.1594	-11.9811	-12.9598	-1.5545	-1.2671	-1.40157	-3.05339	-3.1193	-3.22502	-12.1637	-12.6279	-12.2617	-2.03634	-1.14249	-2.28767	-3.05661	-10.1774	-1.17547	-2.92573	-12.5659	-1.19496	-3.56624	-3.54421	-3.63015	-16.4261	-11.2042	-8.59838	-1.45528	-1.52872	-1.22017	-3.89971	-3.36987	-3.49767	-19.2677	-12.0843	-9.12092	-1.16412
222.1	-2.51222	-2.49903	-2.6814	-15.5704	-13.2782	-10.4561	-2.16639	-1.1824	-1.30737	-3.0724	-2.9268	-2.99034	-12.1577	-11.9479	-12.9143	-1.54801	-1.26435	-1.41138	-3.08037	-3.10273	-3.27581	-12.1492	-12.5513	-12.2456	-2.02662	-1.1327	-2.26173	-3.03161	-10.1653	-1.10965	-2.93318	-12.5407	-1.22138	-3.53801	-3.56221	-3.60191	-16.4568	-11.2658	-8.6355	-1.42856	-1.55094	-1.25497	-3.90804	-3.43206	-3.50214	-19.2882	-12.0118	-9.12313	-1.16066
222	-2.58378	-2.52992	-2.69224	-15.5643	-13.3294	-10.5275	-2.14671	-1.16455	-1.29637	-3.04786	-2.90483	-3.02526	-12.1406	-12.0636	-12.9174	-1.57452	-1.26948	-1.45657	-3.03834	-3.13156	-3.22653	-12.1436	-12.518	-12.2201	-2.0488	-1.14675	-2.26492	-3.03782	-10.1901	-1.12713	-2.86601	-12.5949	-1.24667	-3.53037	-3.57117	-3.58633	-16.4442	-11.2427	-8.65757	-1.45233	-1.59486	-1.20401	-3.84318	-3.45573	-3.4458	-19.1857	-11.941	-9.16092	-1.19721
221.9	-2.56044	-2.53038	-2.68751	-15.5889	-13.3	-10.4964	-2.12238	-1.17174	-1.34473	-3.07036	-2.95408	-3.05998	-12.1061	-12.082	-12.8549	-1.54318	-1.27553	-1.47264	-3.04777	-3.15017	-3.30521	-12.1817	-12.499	-12.2131	-2.08169	-1.14479	-2.26863	-3.10951	-10.2211	-1.19829	-2.83867	-12.6094	-1.2285	-3.49702	-3.60408	-3.55822	-16.4766	-11.2628	-8.69774	-1.47555	-1.5924	-1.21896	-3.82218	-3.45185	-3.41755	-19.1894	-11.8948	-9.17425	-1.13708
221.8	-2.54241	-2.53165	-2.71226	-15.561	-13.2769	-10.4651	-2.13534	-1.20105	-1.30596	-3.05809	-2.97925	-3.06629	-12.1297	-12.0669	-12.9044	-1.52897	-1.26309	-1.43275	-3.06468	-3.1904	-3.30609	-12.16	-12.4679	-12.1911	-2.05058	-1.15924	-2.29657	-3.09267	-10.296	-1.23652	-2.80833	-12.6099	-1.18001	-3.58366	-3.55565	-3.46659	-16.5058	-11.2811	-8.72458	-1.46847	-1.60144	-1.24419	-3.79466	-3.50293	-3.43966	-19.2463	-11.9226	-9.15613	-1.0976
221.7	-2.46438	-2.5924	-2.71735	-15.6668	-13.2625	-10.4391	-2.11932	-1.2057	-1.264	-3.06802	-2.98973	-3.0488	-12.1312	-12.1239	-12.8671	-1.50779	-1.26679	-1.41539	-3.04968	-3.23568	-3.2721	-12.1473	-12.4387	-12.1353	-2.04762	-1.19218	-2.31462	-3.13322	-10.2829	-1.23257	-2.81323	-12.587	-1.16388	-3.63759	-3.5695	-3.42398	-16.4683	-11.3559	-8.74757	-1.44351	-1.62363	-1.23232	-3.81102	-3.53612	-3.4585	-19.1992	-11.878	-9.16435	-1.10215
221.6	-2.47592	-2.5631	-2.72441	-15.5481	-13.2914	-10.4239	-2.18242	-1.12752	-1.22899	-3.12407	-3.04396	-3.03976	-12.093	-12.09	-12.8006	-1.52378	-1.27369	-1.44203	-3.05642	-3.20872	-3.24035	-12.1186	-12.3771	-12.0783	-2.03972	-1.19227	-2.33081	-3.14389	-10.2775	-1.28932	-2.75187	-12.6624	-1.13969	-3.67402	-3.54495	-3.37355	-16.5278	-11.3116	-8.68118	-1.46268	-1.64494	-1.17002	-3.80293	-3.57431	-3.52088	-19.1699	-11.9245	-9.16982	-1.10456
221.5	-2.5337	-2.57174	-2.7054	-15.5178	-13.3128	-10.4046	-2.16036	-1.18007	-1.2595	-3.10855	-3.03715	-3.08054	-12.1342	-12.0636	-12.7934	-1.47669	-1.30795	-1.42019	-3.06697	-3.23111	-3.26721	-12.1279	-12.3797	-12.0496	-2.04681	-1.21373	-2.36745	-3.10532	-10.3083	-1.32911	-2.78944	-12.6773	-1.15481	-3.67082	-3.61381	-3.44821	-16.5668	-11.2614	-8.67092	-1.46162	-1.64341	-1.17678	-3.83307	-3.50745	-3.54733	-19.0225	-11.9199	-9.18963	-1.08456
221.4	-2.48815	-2.58476	-2.68428	-15.539	-13.2235	-10.4421	-2.15985	-1.2176	-1.2779	-3.11518	-3.03012	-3.04734	-12.1821	-12.1338	-12.7525	-1.48694	-1.29934	-1.40797	-3.02382	-3.26262	-3.26998	-12.0596	-12.3815	-12.0747	-2.07124	-1.1878	-2.37238	-3.15632	-10.2909	-1.33786	-2.82026	-12.6702	-1.12474	-3.67656	-3.60503	-3.48884	-16.5481	-11.2572	-8.7186	-1.49563	-1.6363	-1.12804	-3.8258	-3.58411	-3.54092	-19.0551	-11.9415	-9.17139	-1.11021
221.3	-2.50051	-2.56805	-2.73756	-15.5388	-13.1907	-10.4197	-2.15493	-1.2075	-1.2495	-3.13386	-2.99314	-3.09951	-12.1875	-12.1396	-12.7253	-1.48428	-1.30064	-1.38689	-3.06931	-3.25974	-3.34364	-11.9863	-12.3242	-12.0717	-2.11286	-1.22126	-2.42177	-3.15017	-10.3659	-1.36	-2.77028	-12.607	-1.16771	-3.69363	-3.62106	-3.50756	-16.5222	-11.2775	-8.72379	-1.4223	-1.69035	-1.11861	-3.89873	-3.56419	-3.47272	-19.0187	-11.9737	-9.1893	-1.09902
221.2	-2.52199	-2.63488	-2.80285	-15.5416	-13.1393	-10.4961	-2.17195	-1.23192	-1.18744	-3.13144	-2.98351	-3.13336	-12.1577	-12.0081	-12.7594	-1.53358	-1.25602	-1.44291	-3.11997	-3.24863	-3.31672	-11.9639	-12.2761	-12.1454	-2.08384	-1.21687	-2.41448	-3.19856	-10.3764	-1.39324	-2.76834	-12.6703	-1.14738	-3.70399	-3.58721	-3.53391	-16.5319	-11.2847	-8.74065	-1.43116	-1.63815	-1.1514	-3.93572	-3.5298	-3.47452	-19.0619	-11.9173	-9.2171	-1.10394
221.1	-2.4679	-2.6356	-2.82891	-15.4818	-13.0778	-10.517	-2.11096	-1.19356	-1.16001	-3.11893	-2.96655	-3.14339	-12.1176	-11.9288	-12.7046	-1.49491	-1.18108	-1.43615	-3.10654	-3.18675	-3.32251	-11.9293	-12.2487	-12.0995	-2.03647	-1.23664	-2.43462	-3.18705	-10.4037	-1.43595	-2.81302	-12.563	-1.13128	-3.72732	-3.60025	-3.52351	-16.6052	-11.266	-8.73416	-1.41842	-1.58134	-1.13801	-3.9652	-3.56692	-3.49615	-19.0057	-11.9272	-9.27506	-1.04281
221	-2.4561	-2.63708	-2.84177	-15.4488	-13.0346	-10.4659	-2.0952	-1.18426	-1.21121	-3.17131	-2.93149	-3.17937	-12.1772	-11.853	-12.76	-1.45946	-1.23347	-1.43984	-3.0731	-3.25366	-3.32959	-11.8674	-12.1987	-12.1309	-1.99043	-1.27262	-2.4258	-3.24939	-10.3285	-1.43226	-2.84291	-12.6046	-1.08104	-3.66659	-3.59497	-3.4663	-16.6334	-11.2356	-8.76044	-1.43766	-1.59927	-1.16454	-3.92135	-3.57522	-3.5522	-19.0276	-11.956	-9.24523	-1.07708
220.9	-2.49981	-2.64405	-2.76516	-15.4554	-13.0696	-10.5031	-2.09936	-1.15133	-1.23166	-3.12954	-2.92676	-3.24699	-12.1634	-11.7952	-12.7213	-1.44295	-1.27587	-1.41703	-3.17348	-3.21805	-3.38124	-11.8454	-12.1782	-12.0722	-1.98488	-1.28359	-2.44396	-3.27734	-10.2529	-1.42656	-2.86206	-12.5647	-1.06181	-3.67032	-3.6271	-3.45753	-16.6735	-11.3102	-8.71137	-1.43678	-1.56427	-1.17089	-3.99527	-3.52274	-3.56771	-18.9977	-11.9405	-9.32081	-1.13464
220.8	-2.47197	-2.69675	-2.78184	-15.4141	-13.0642	-10.4688	-2.12548	-1.14415	-1.22967	-3.15395	-2.95347	-3.26037	-12.1376	-11.7386	-12.6592	-1.48776	-1.26183	-1.41485	-3.16187	-3.21887	-3.37445	-11.7969	-12.1809	-12.0097	-1.96658	-1.30152	-2.45226	-3.17031	-10.2849	-1.42218	-2.88009	-12.4731	-1.08118	-3.74876	-3.64172	-3.49515	-16.6881	-11.3387	-8.69823	-1.39598	-1.61191	-1.18731	-3.99022	-3.55058	-3.58883	-19.0138	-11.8809	-9.30174	-1.14579
220.7	-2.51184	-2.65748	-2.77178	-15.4043	-13.0547	-10.4836	-2.11449	-1.16693	-1.25181	-3.09086	-2.92032	-3.24739	-12.14	-11.7232	-12.6747	-1.57827	-1.24714	-1.39546	-3.11739	-3.18799	-3.35218	-11.7941	-12.1458	-12.0002	-1.94607	-1.27556	-2.48231	-3.15808	-10.3368	-1.34522	-2.92513	-12.4724	-1.09935	-3.75756	-3.55491	-3.46599	-16.7436	-11.3061	-8.69844	-1.41481	-1.57571	-1.17409	-3.94452	-3.62566	-3.6553	-18.9058	-11.9255	-9.32302	-1.15855
220.6	-2.5249	-2.65784	-2.7383	-15.3717	-13.0232	-10.4412	-2.13233	-1.19474	-1.27166	-3.11924	-2.90782	-3.23602	-12.0801	-11.7592	-12.6432	-1.56659	-1.23159	-1.41872	-3.08926	-3.21746	-3.34139	-11.7478	-12.1318	-11.9545	-1.9763	-1.27438	-2.46159	-3.17496	-10.4628	-1.31746	-2.89791	-12.4364	-1.08045	-3.74034	-3.51096	-3.41656	-16.7577	-11.2701	-8.68631	-1.39935	-1.61286	-1.2217	-3.97707	-3.61825	-3.65242	-18.8206	-11.8954	-9.3467	-1.15702
220.5	-2.50043	-2.65948	-2.77194	-15.329	-12.9867	-10.4547	-2.15197	-1.20637	-1.25697	-3.13277	-2.9902	-3.21756	-12.0924	-11.7342	-12.6051	-1.58349	-1.18909	-1.41045	-3.09838	-3.19574	-3.34099	-11.8094	-12.08	-11.9321	-2.0529	-1.26717	-2.45786	-3.13673	-10.4238	-1.32898	-2.8806	-12.4789	-1.08173	-3.76649	-3.55568	-3.45222	-16.7857	-11.2588	-8.70066	-1.44299	-1.64147	-1.19027	-3.98261	-3.62709	-3.64748	-18.7335	-11.8368	-9.34718	-1.11913
220.4	-2.43667	-2.69693	-2.78782	-15.3807	-12.9405	-10.4664	-2.13802	-1.23521	-1.1958	-3.12006	-3.00547	-3.22049	-12.1107	-11.7725	-12.5585	-1.57421	-1.17458	-1.43603	-3.11901	-3.20552	-3.30157	-11.7715	-12.065	-11.9426	-2.03233	-1.30524	-2.50827	-3.12719	-10.3976	-1.34376	-2.93538	-12.4481	-1.0704	-3.77629	-3.62656	-3.41754	-16.7124	-11.2219	-8.75468	-1.42695	-1.6235	-1.18957	-3.9696	-3.60827	-3.67458	-18.7196	-11.8016	-9.3489	-1.11459
220.3	-2.44672	-2.66913	-2.76962	-15.3881	-12.8884	-10.4628	-2.09679	-1.21599	-1.16936	-3.11481	-2.97876	-3.21064	-12.1356	-11.7054	-12.5612	-1.57797	-1.17968	-1.45011	-3.16154	-3.22999	-3.28402	-11.7742	-12.1354	-11.8683	-1.98906	-1.2475	-2.5474	-3.08917	-10.3893	-1.38726	-2.8785	-12.4753	-1.02809	-3.82471	-3.61019	-3.46642	-16.6883	-11.2504	-8.77632	-1.41499	-1.62513	-1.20816	-3.93869	-3.58193	-3.69692	-18.5301	-11.828	-9.38542	-1.15385
220.2	-2.52465	-2.62167	-2.77728	-15.3587	-12.8287	-10.4882	-2.13193	-1.25533	-1.1884	-3.05149	-3.02473	-3.20626	-12.1104	-11.6771	-12.4195	-1.58457	-1.10717	-1.52142	-3.14816	-3.18823	-3.25404	-11.726	-12.0892	-11.8228	-1.98973	-1.25706	-2.55556	-3.06427	-10.4719	-1.38662	-2.8615	-12.4431	-1.0072	-3.82081	-3.60064	-3.45956	-16.6707	-11.1928	-8.81124	-1.39558	-1.66872	-1.14826	-3.97727	-3.57403	-3.73314	-18.4256	-11.823	-9.35873	-1.15543
220.1	-2.5742	-2.53738	-2.7547	-15.3269	-12.8637	-10.4066	-2.10795	-1.32139	-1.21834	-3.12326	-3.08764	-3.21618	-12.1175	-11.6726	-12.3728	-1.57493	-1.15143	-1.52941	-3.10002	-3.16616	-3.21525	-11.7008	-12.0274	-11.7658	-1.95224	-1.29586	-2.55809	-3.07815	-10.4425	-1.33656	-2.83404	-12.3849	-1.067	-3.78712	-3.53743	-3.4716	-16.625	-11.1873	-8.84168	-1.42757	-1.69738	-1.09528	-3.98517	-3.56125	-3.75061	-18.2261	-11.6901	-9.28279	-1.18269
220	-2.60058	-2.50916	-2.78989	-15.2244	-12.8464	-10.3935	-2.09578	-1.34206	-1.22533	-3.13918	-3.06886	-3.23956	-12.0885	-11.6626	-12.3796	-1.57743	-1.16	-1.57946	-3.0466	-3.11216	-3.15882	-11.7328	-12.0104	-11.752	-1.93725	-1.31035	-2.54937	-3.06531	-10.4753	-1.33151	-2.84946	-12.3282	-1.13429	-3.83231	-3.59805	-3.4581	-16.5956	-11.1369	-8.77891	-1.4183	-1.65582	-1.09112	-3.97256	-3.57485	-3.73502	-18.1394	-11.6681	-9.19935	-1.18491
219.9	-2.62782	-2.56316	-2.74019	-15.1836	-12.8379	-10.3906	-2.12008	-1.41336	-1.23399	-3.21736	-3.10602	-3.27314	-12.0852	-11.6032	-12.368	-1.6088	-1.17432	-1.54441	-3.00082	-3.03736	-3.15728	-11.6325	-11.929	-11.6552	-1.95321	-1.33876	-2.52099	-3.05601	-10.4528	-1.3381	-2.74798	-12.2969	-1.08127	-3.8736	-3.64053	-3.47845	-16.5376	-11.1246	-8.82516	-1.41893	-1.68752	-1.10705	-3.92027	-3.59061	-3.71803	-18.1254	-11.5888	-9.15931	-1.18916
219.8	-2.60357	-2.60116	-2.7862	-15.2004	-12.7766	-10.4293	-2.03383	-1.42316	-1.23194	-3.26873	-3.11345	-3.25382	-12.1052	-11.5967	-12.2619	-1.65865	-1.13672	-1.52142	-2.98932	-3.01386	-3.12702	-11.6447	-11.9438	-11.64	-1.95735	-1.3584	-2.48587	-3.03305	-10.3879	-1.39508	-2.80807	-12.2371	-1.02827	-3.84781	-3.67235	-3.46449	-16.4951	-11.0756	-8.80938	-1.40637	-1.68566	-1.07163	-4.00948	-3.62334	-3.73439	-18.1616	-11.6069	-9.26237	-1.23064
219.7	-2.64054	-2.67095	-2.76499	-15.1051	-12.8033	-10.3861	-1.99492	-1.46359	-1.26158	-3.31613	-3.12559	-3.27973	-12.0295	-11.5695	-12.2256	-1.66515	-1.06816	-1.56783	-3.04273	-2.95238	-3.08764	-11.5559	-11.8936	-11.6258	-1.96181	-1.41827	-2.4541	-3.0277	-10.4258	-1.43741	-2.85017	-12.1985	-1.04478	-3.82473	-3.7293	-3.45482	-16.5652	-11.0931	-8.80543	-1.37496	-1.71395	-1.06598	-4.07811	-3.65145	-3.73089	-18.0622	-11.6349	-9.25974	-1.26487
219.6	-2.66584	-2.66385	-2.74958	-15.0888	-12.7987	-10.412	-1.97965	-1.44665	-1.26069	-3.32784	-3.14213	-3.26073	-11.9494	-11.6242	-12.205	-1.63147	-1.05253	-1.61548	-3.12197	-2.91583	-3.03825	-11.4664	-11.8515	-11.5677	-1.99657	-1.40552	-2.45277	-3.03462	-10.4406	-1.48192	-2.87711	-12.1713	-1.04043	-3.81503	-3.71289	-3.51098	-16.5721	-11.0732	-8.73744	-1.34111	-1.69778	-1.03962	-4.15344	-3.70771	-3.63398	-18.0301	-11.6177	-9.22279	-1.25107
219.5	-2.64865	-2.6521	-2.75487	-15.0277	-12.8317	-10.3645	-1.95825	-1.44293	-1.22905	-3.36442	-3.14474	-3.19836	-11.9882	-11.6233	-12.1605	-1.58823	-1.02758	-1.56568	-3.11923	-2.9091	-3.07771	-11.4192	-11.8292	-11.5298	-1.97911	-1.41628	-2.45836	-3.00845	-10.4249	-1.50115	-2.82875	-12.1875	-1.12187	-3.73358	-3.76346	-3.51889	-16.4835	-10.9833	-8.72785	-1.37001	-1.7084	-1.06701	-4.1582	-3.673	-3.59168	-17.8936	-11.6199	-9.20033	-1.22068
219.4	-2.62274	-2.67003	-2.75259	-14.9138	-12.8126	-10.3662	-1.94779	-1.50538	-1.24047	-3.36554	-3.14276	-3.20013	-11.9785	-11.6111	-12.0775	-1.5108	-1.04521	-1.60565	-3.02941	-2.9953	-3.05496	-11.3402	-11.8773	-11.4113	-1.94278	-1.41238	-2.43789	-2.9752	-10.3652	-1.49625	-2.92848	-12.1233	-1.07589	-3.78794	-3.73715	-3.51573	-16.5242	-11.0338	-8.67091	-1.32547	-1.75596	-1.08798	-4.198	-3.6914	-3.61152	-17.7598	-11.5413	-9.14346	-1.25091
219.3	-2.67512	-2.67631	-2.77708	-14.8449	-12.8014	-10.392	-1.8815	-1.53914	-1.18306	-3.41136	-3.14567	-3.2209	-11.9468	-11.5789	-12.045	-1.45987	-0.977624	-1.59392	-3.00456	-2.97698	-3.06206	-11.3367	-11.8821	-11.3565	-1.9146	-1.45398	-2.44906	-2.95126	-10.3507	-1.54257	-2.95798	-12.1726	-1.04823	-3.829	-3.71973	-3.59874	-16.4526	-11.0375	-8.618	-1.40658	-1.69922	-1.09862	-4.13361	-3.79421	-3.63271	-17.5447	-11.4613	-9.13417	-1.2604
219.2	-2.74229	-2.64073	-2.76726	-14.8201	-12.7391	-10.3769	-1.88071	-1.49374	-1.11246	-3.38313	-3.17701	-3.28194	-11.9988	-11.5408	-12.069	-1.49397	-1.00172	-1.63862	-3.01878	-3.02493	-3.04975	-11.3344	-11.8073	-11.3577	-1.89938	-1.43405	-2.41486	-2.96074	-10.3104	-1.55635	-2.97001	-12.0914	-0.978253	-3.79326	-3.7327	-3.56464	-16.4709	-11.0299	-8.66229	-1.43426	-1.73965	-1.08958	-4.11298	-3.80538	-3.66628	-17.4906	-11.3625	-9.16262	-1.30309
219.1	-2.77906	-2.66842	-2.77454	-14.8278	-12.6868	-10.3575	-1.92643	-1.456	-1.07141	-3.39034	-3.14005	-3.31743	-11.9286	-11.5373	-11.9985	-1.48989	-0.983196	-1.66963	-3.00423	-3.007	-2.96395	-11.2016	-11.8362	-11.3349	-1.89689	-1.48177	-2.41065	-2.93316	-10.3466	-1.5251	-2.98816	-12.0905	-1.00757	-3.78642	-3.74166	-3.59368	-16.4857	-11.0491	-8.67208	-1.42384	-1.78397	-1.04661	-4.10502	-3.83783	-3.68891	-17.4476	-11.3656	-9.13437	-1.33122
219	-2.77846	-2.71187	-2.77676	-14.8323	-12.6528	-10.3029	-2.04949	-1.41354	-1.07809	-3.42192	-3.1957	-3.31528	-11.9034	-11.5097	-11.9352	-1.45044	-1.00134	-1.71485	-3.01993	-2.99625	-2.91117	-11.1421	-11.7547	-11.2941	-1.91899	-1.49312	-2.44508	-2.92529	-10.3342	-1.49209	-2.97413	-12.0671	-1.04731	-3.72738	-3.76114	-3.60459	-16.5112	-11.0531	-8.71136	-1.46576	-1.73369	-1.12089	-4.03545	-3.83673	-3.71632	-17.3757	-11.3649	-9.10321	-1.40704
218.9	-2.75583	-2.67404	-2.84016	-14.751	-12.5745	-10.3604	-2.05586	-1.42348	-1.06184	-3.34116	-3.1624	-3.36321	-11.863	-11.4321	-11.8468	-1.43377	-1.01094	-1.68181	-3.0094	-3.01914	-2.87855	-11.2081	-11.7471	-11.2729	-1.92948	-1.50181	-2.453	-2.97049	-10.2918	-1.53462	-3.03614	-12.071	-1.11293	-3.72079	-3.73977	-3.55385	-16.5336	-11.0501	-8.67079	-1.44084	-1.70745	-1.12116	-4.00766	-3.81347	-3.69858	-17.2763	-11.3924	-9.09001	-1.40197
218.8	-2.76996	-2.66123	-2.75506	-14.7553	-12.5973	-10.3151	-2.05601	-1.40084	-1.03629	-3.29119	-3.18907	-3.35297	-11.856	-11.4134	-11.8141	-1.45896	-1.04391	-1.67693	-3.06867	-2.96412	-2.86851	-11.1476	-11.7089	-11.2886	-1.87594	-1.54906	-2.48194	-2.98546	-10.2129	-1.51317	-3.10982	-12.0205	-1.11489	-3.72358	-3.69597	-3.54175	-16.4781	-10.9977	-8.55246	-1.46251	-1.66732	-1.13319	-4.04169	-3.75179	-3.71392	-17.2559	-11.3685	-9.06819	-1.37785
218.7	-2.83266	-2.62716	-2.73435	-14.6508	-12.5337	-10.3273	-2.05851	-1.40392	-1.00683	-3.31082	-3.17009	-3.30933	-11.821	-11.338	-11.8037	-1.47606	-1.05785	-1.67055	-3.07421	-2.96664	-2.85829	-11.0703	-11.6904	-11.2655	-1.86182	-1.57576	-2.50216	-3.01079	-10.1891	-1.45443	-3.13588	-11.9168	-1.06993	-3.7323	-3.67405	-3.58051	-16.45	-10.9421	-8.5379	-1.36456	-1.69546	-1.12146	-4.07503	-3.75517	-3.69437	-17.1667	-11.3722	-9.01741	-1.44083
218.6	-2.85787	-2.63713	-2.73284	-14.6603	-12.4925	-10.4062	-2.04531	-1.36489	-1.03451	-3.26191	-3.15855	-3.29284	-11.7901	-11.3382	-11.7557	-1.54086	-1.06242	-1.64667	-3.00336	-2.93094	-2.87126	-11.1077	-11.6822	-11.241	-1.89363	-1.5727	-2.48811	-3.00605	-10.1727	-1.46524	-3.13821	-11.8724	-1.06464	-3.72308	-3.68856	-3.62315	-16.4178	-10.8532	-8.59489	-1.3471	-1.68981	-1.1227	-4.09034	-3.72172	-3.70851	-17.0932	-11.3109	-9.00754	-1.48631
218.5	-2.89483	-2.65124	-2.75776	-14.515	-12.5525	-10.3913	-2.00914	-1.37282	-1.02277	-3.25189	-3.15107	-3.30222	-11.7528	-11.3061	-11.7543	-1.52968	-1.03223	-1.62392	-3.01691	-2.90941	-2.90253	-10.9777	-11.6356	-11.2459	-1.91671	-1.52864	-2.44501	-2.94888	-10.1709	-1.45102	-3.1205	-11.8947	-1.09157	-3.69321	-3.7304	-3.66579	-16.4107	-10.8241	-8.58865	-1.37653	-1.64287	-1.12625	-4.03617	-3.65616	-3.73111	-17.0715	-11.2483	-8.99826	-1.48285
218.4	-2.88322	-2.72963	-2.75925	-14.5452	-12.5228	-10.3462	-1.95858	-1.39334	-1.07569	-3.22731	-3.13436	-3.26718	-11.7056	-11.2734	-11.7366	-1.5347	-1.03544	-1.57422	-3.05778	-2.93385	-2.91274	-10.9785	-11.6259	-11.3174	-1.94374	-1.51389	-2.44298	-3.00911	-10.2055	-1.4335	-3.09317	-11.7795	-1.11055	-3.72634	-3.71151	-3.67052	-16.4331	-10.8352	-8.6421	-1.35284	-1.64612	-1.19116	-4.11216	-3.59695	-3.75083	-17.0132	-11.1546	-8.92405	-1.45835
218.3	-2.88082	-2.76244	-2.76872	-14.6232	-12.533	-10.388	-1.97754	-1.31899	-1.03465	-3.26133	-3.13163	-3.26886	-11.6533	-11.2593	-11.7358	-1.58289	-1.00025	-1.61903	-3.05217	-2.89371	-2.82742	-10.9464	-11.5598	-11.2464	-1.93977	-1.54077	-2.41958	-3.06756	-10.201	-1.48731	-3.06204	-11.7165	-1.16243	-3.7207	-3.71176	-3.62063	-16.4089	-10.9209	-8.60594	-1.39377	-1.60461	-1.19929	-4.12608	-3.62031	-3.77327	-17.0182	-11.0873	-8.83691	-1.49561
218.2	-2.93666	-2.74084	-2.70813	-14.5834	-12.5666	-10.3435	-2.02134	-1.32056	-1.05283	-3.22299	-3.12155	-3.2043	-11.5671	-11.1314	-11.7772	-1.57859	-0.979042	-1.62171	-3.07514	-2.85333	-2.84392	-10.9319	-11.5581	-11.2397	-1.93231	-1.56467	-2.38009	-3.05501	-10.2106	-1.46474	-3.00791	-11.7141	-1.15082	-3.75562	-3.71054	-3.61097	-16.4698	-10.8912	-8.53739	-1.38056	-1.61177	-1.20245	-4.14247	-3.56703	-3.79631	-16.9031	-11.0659	-8.85735	-1.48206
218.1	-2.91481	-2.74763	-2.69764	-14.5513	-12.6156	-10.3088	-2.05649	-1.35756	-1.02103	-3.19572	-3.13756	-3.17594	-11.5336	-11.0631	-11.8225	-1.54803	-0.962726	-1.59825	-3.01964	-2.8556	-2.76216	-10.9751	-11.5472	-11.2322	-1.92311	-1.56872	-2.39496	-3.04734	-10.1997	-1.4512	-3.05624	-11.7698	-1.14842	-3.72785	-3.70212	-3.59074	-16.4998	-10.8519	-8.51264	-1.38084	-1.60555	-1.24312	-4.0965	-3.53128	-3.82609	-16.8107	-11.0413	-8.86075	-1.50366
218	-2.8421	-2.73435	-2.65007	-14.5906	-12.5218	-10.2257	-2.02734	-1.29587	-1.01908	-3.21206	-3.14957	-3.14436	-11.5452	-11.1814	-11.8061	-1.48708	-0.971658	-1.55772	-3.06824	-2.86449	-2.73882	-10.9545	-11.4984	-11.0968	-1.92747	-1.58078	-2.3857	-3.0191	-10.1809	-1.45159	-3.08251	-11.7494	-1.1187	-3.75902	-3.70568	-3.55997	-16.4877	-10.8129	-8.43146	-1.37728	-1.60347	-1.23534	-4.08717	-3.59262	-3.82038	-16.7291	-11.0391	-8.81554	-1.4908
217.9	-2.84896	-2.7066	-2.62168	-14.5531	-12.5686	-10.1949	-2.11648	-1.37794	-1.02376	-3.15681	-3.17596	-3.1225	-11.5681	-11.2313	-11.8224	-1.47625	-0.990612	-1.52455	-3.00026	-2.86869	-2.7366	-10.8907	-11.3484	-11.0005	-1.94356	-1.56908	-2.41054	-3.04888	-10.1202	-1.46911	-3.08936	-11.8063	-1.12588	-3.7464	-3.72736	-3.59972	-16.4237	-10.8983	-8.39373	-1.40195	-1.61483	-1.26921	-4.08521	-3.61431	-3.86542	-16.7921	-11.0195	-8.75117	-1.52199
217.8	-2.92837	-2.6472	-2.59668	-14.5578	-12.6114	-10.2032	-2.12672	-1.37344	-0.969265	-3.13377	-3.12713	-3.13583	-11.5053	-11.2338	-11.7927	-1.44866	-0.994193	-1.51665	-2.99439	-2.84078	-2.74431	-10.9198	-11.3242	-10.9384	-2.00488	-1.57742	-2.44777	-2.99912	-10.0798	-1.46524	-3.09358	-11.8235	-1.17466	-3.77869	-3.69065	-3.6772	-16.4052	-10.9086	-8.36033	-1.3421	-1.63462	-1.27018	-4.06532	-3.60408	-3.85151	-16.6789	-10.9624	-8.80562	-1.52518
217.7	-2.90702	-2.68323	-2.66696	-14.5297	-12.5865	-10.1299	-2.12533	-1.34429	-0.967259	-3.09989	-3.05715	-3.12239	-11.4378	-11.2586	-11.8091	-1.44266	-0.967622	-1.49951	-2.99976	-2.86049	-2.70464	-10.9166	-11.2655	-10.9645	-1.99792	-1.55829	-2.46867	-2.91575	-10.1176	-1.43138	-3.03057	-11.8521	-1.17433	-3.74272	-3.67262	-3.68727	-16.3348	-10.9002	-8.42321	-1.28669	-1.64612	-1.24252	-4.06189	-3.67889	-3.8345	-16.6467	-10.9468	-8.76809	-1.48309
217.6	-2.96245	-2.62565	-2.68411	-14.588	-12.5539	-10.149	-2.12949	-1.37989	-1.02025	-3.10423	-3.04486	-3.0915	-11.3186	-11.1702	-11.7948	-1.43084	-1.00306	-1.47722	-2.99014	-2.91	-2.71073	-10.94	-11.1957	-10.9815	-1.97937	-1.53657	-2.49851	-2.94617	-10.1353	-1.46132	-3.03727	-11.8098	-1.19859	-3.7399	-3.68575	-3.67257	-16.3118	-10.8123	-8.45505	-1.32297	-1.6277	-1.2094	-4.0735	-3.71982	-3.80354	-16.5358	-10.9985	-8.72319	-1.51524
217.5	-3.00792	-2.63793	-2.60425	-14.6014	-12.5254	-10.1666	-2.17921	-1.38793	-0.963415	-3.1357	-3.08662	-3.12743	-11.3584	-11.1871	-11.7206	-1.41528	-1.04101	-1.49946	-3.03396	-2.92165	-2.74731	-10.908	-11.1576	-10.8906	-1.94484	-1.52126	-2.57009	-2.9472	-10.1177	-1.51139	-2.99779	-11.8114	-1.20158	-3.72785	-3.74887	-3.64618	-16.2305	-10.8583	-8.43648	-1.28832	-1.63627	-1.20782	-4.09269	-3.60445	-3.76363	-16.5888	-10.9442	-8.66202	-1.46342
217.4	-2.98511	-2.68963	-2.58728	-14.5732	-12.5682	-10.1408	-2.19523	-1.35666	-0.952796	-3.16087	-3.10803	-3.1219	-11.3879	-11.1334	-11.7498	-1.43676	-1.02593	-1.48276	-3.03704	-2.95033	-2.78764	-10.8381	-11.1301	-10.9201	-1.93276	-1.55908	-2.53804	-2.95341	-10.0496	-1.48962	-3.02937	-11.8204	-1.13876	-3.67174	-3.76117	-3.653	-16.2089	-10.9089	-8.45858	-1.32414	-1.63697	-1.19581	-4.10005	-3.61737	-3.82292	-16.6626	-10.8735	-8.6397	-1.48886
217.3	-3.0009	-2.69632	-2.60873	-14.5594	-12.5734	-10.1059	-2.14781	-1.38033	-0.934925	-3.13881	-3.07002	-3.11371	-11.3225	-11.0939	-11.6769	-1.39553	-1.06139	-1.41696	-2.99951	-2.922	-2.74961	-10.7459	-11.1625	-10.8979	-1.9301	-1.55334	-2.53286	-3.07194	-10.0986	-1.42516	-3.03001	-11.7642	-1.18569	-3.66161	-3.74034	-3.67863	-16.2218	-10.9088	-8.39474	-1.33511	-1.58909	-1.24111	-4.10834	-3.58472	-3.8601	-16.574	-10.8297	-8.64971	-1.5048
217.2	-3.11709	-2.69343	-2.56797	-14.5221	-12.6243	-10.0444	-2.1546	-1.37428	-0.908861	-3.10902	-3.13188	-3.12813	-11.3432	-11.0596	-11.6804	-1.45296	-1.01072	-1.39624	-2.97033	-2.88928	-2.77049	-10.6423	-11.0875	-10.9278	-1.90844	-1.55689	-2.5537	-3.07789	-10.0846	-1.4267	-3.04851	-11.8134	-1.17049	-3.64022	-3.72704	-3.68016	-16.2522	-10.8911	-8.3581	-1.39532	-1.66443	-1.24275	-4.11411	-3.59075	-3.87371	-16.5597	-10.8958	-8.61434	-1.49285
217.1	-3.13535	-2.74976	-2.56899	-14.5166	-12.6392	-10.034	-2.14434	-1.29903	-0.97595	-3.12246	-3.13191	-3.09287	-11.2912	-11.0561	-11.6577	-1.43445	-0.968146	-1.34931	-2.93892	-2.88247	-2.83117	-10.5488	-10.9825	-10.8737	-1.93459	-1.52206	-2.54312	-3.08369	-10.0627	-1.45033	-3.10134	-11.779	-1.17993	-3.66873	-3.75694	-3.73023	-16.3295	-10.8641	-8.32461	-1.46018	-1.6255	-1.23105	-4.08937	-3.65054	-3.87969	-16.5825	-10.7927	-8.60718	-1.49023
217	-3.13027	-2.75037	-2.54779	-14.5169	-12.6133	-9.99538	-2.16178	-1.29027	-0.991049	-3.10013	-3.05247	-3.0803	-11.2346	-11.131	-11.6688	-1.45382	-1.07273	-1.31569	-2.93801	-2.94015	-2.81831	-10.4981	-10.9636	-10.8671	-1.91835	-1.49965	-2.53773	-3.10648	-9.97009	-1.39006	-3.07632	-11.762	-1.18332	-3.64544	-3.72772	-3.68699	-16.3157	-10.941	-8.25391	-1.47414	-1.59183	-1.23385	-4.05597	-3.71487	-3.86664	-16.5938	-10.7543	-8.63384	-1.45749
216.9	-3.08023	-2.77291	-2.53512	-14.4904	-12.587	-10.021	-2.17429	-1.26541	-0.979542	-3.09465	-3.02648	-3.08568	-11.2628	-11.0878	-11.7433	-1.44287	-1.10568	-1.33439	-2.92178	-2.92685	-2.8435	-10.401	-10.9281	-10.8355	-1.89015	-1.50153	-2.55139	-3.14712	-9.98995	-1.42088	-3.09964	-11.7666	-1.2086	-3.70006	-3.77436	-3.66356	-16.295	-10.9556	-8.24819	-1.47566	-1.57974	-1.32293	-4.06136	-3.7972	-3.87665	-16.6306	-10.76	-8.65091	-1.44744
216.8	-3.04902	-2.76419	-2.54099	-14.48	-12.6033	-9.98478	-2.19349	-1.28589	-0.926306	-3.06249	-3.00819	-3.0643	-11.2832	-10.9705	-11.7654	-1.44137	-1.07233	-1.32101	-2.98686	-2.99438	-2.81536	-10.3554	-10.8888	-10.7705	-1.95246	-1.50823	-2.5447	-3.12913	-9.99549	-1.44479	-3.15827	-11.779	-1.1834	-3.6758	-3.78427	-3.6839	-16.2621	-10.9733	-8.32826	-1.51926	-1.59281	-1.39188	-4.11382	-3.82102	-3.88424	-16.6222	-10.7272	-8.6609	-1.44836
216.7	-3.04975	-2.77343	-2.52318	-14.4582	-12.5689	-9.94092	-2.1587	-1.28061	-0.926561	-3.07129	-3.03772	-3.12847	-11.2622	-10.9195	-11.7444	-1.47951	-1.05254	-1.28334	-3.05999	-3.06543	-2.83706	-10.3505	-10.8772	-10.802	-2.00867	-1.5419	-2.54013	-3.1352	-9.96509	-1.44343	-3.19811	-11.7721	-1.16317	-3.6803	-3.77005	-3.70945	-16.2696	-10.9695	-8.26988	-1.51378	-1.61349	-1.41889	-4.1806	-3.78929	-3.91071	-16.5203	-10.7186	-8.71173	-1.42784
216.6	-3.04869	-2.71994	-2.5217	-14.4827	-12.62	-9.9479	-2.18497	-1.32499	-0.860413	-2.98897	-3.02059	-3.09914	-11.1842	-10.9557	-11.7373	-1.39708	-1.07311	-1.31446	-3.04367	-3.11941	-2.85305	-10.3135	-10.8905	-10.84	-1.99881	-1.44656	-2.54564	-3.14529	-9.96786	-1.40076	-3.21689	-11.784	-1.18886	-3.70507	-3.7533	-3.71968	-16.2256	-10.9605	-8.25202	-1.54404	-1.59248	-1.40342	-4.21002	-3.74491	-3.96157	-16.4881	-10.6527	-8.73541	-1.44805
216.5	-3.04659	-2.65494	-2.47084	-14.4404	-12.5481	-9.94978	-2.22595	-1.29319	-0.86521	-3.00804	-3.02716	-3.13162	-11.1129	-10.9351	-11.7804	-1.40828	-1.12068	-1.30867	-3.04559	-3.16994	-2.8508	-10.255	-10.757	-10.8251	-2.00946	-1.45633	-2.56562	-3.24302	-9.99895	-1.41493	-3.21121	-11.7856	-1.23146	-3.79362	-3.71914	-3.72598	-16.1999	-10.8983	-8.25401	-1.50415	-1.52742	-1.36595	-4.19344	-3.74951	-3.95946	-16.371	-10.5965	-8.69937	-1.42321
216.4	-3.02004	-2.66089	-2.47936	-14.4732	-12.5477	-9.99445	-2.27586	-1.2918	-0.863734	-2.9871	-3.04499	-3.107	-11.1745	-10.8834	-11.8055	-1.36459	-1.16705	-1.28645	-3.06046	-3.21259	-2.8902	-10.2838	-10.8015	-10.8219	-2.00477	-1.46133	-2.57116	-3.26728	-9.98843	-1.36209	-3.16985	-11.8196	-1.32818	-3.88221	-3.7287	-3.81358	-16.1867	-10.8507	-8.20353	-1.50785	-1.54209	-1.36899	-4.08482	-3.70882	-4.0466	-16.3301	-10.6217	-8.71414	-1.4553
216.3	-3.05446	-2.65499	-2.48235	-14.4521	-12.5634	-10.0286	-2.26838	-1.39185	-0.845264	-3.00328	-3.04288	-3.10225	-11.2383	-10.799	-11.8675	-1.42929	-1.1965	-1.30136	-3.06292	-3.27085	-2.93787	-10.2795	-10.7165	-10.8267	-1.99781	-1.46223	-2.57364	-3.313	-9.97033	-1.35867	-3.15091	-11.7654	-1.3371	-3.79775	-3.72557	-3.82238	-16.213	-10.9091	-8.27555	-1.49032	-1.53816	-1.39428	-4.08741	-3.71406	-4.03151	-16.2961	-10.566	-8.7201	-1.46889
216.2	-3.06101	-2.62638	-2.48683	-14.4533	-12.5605	-10.0302	-2.29922	-1.42142	-0.860718	-2.97349	-3.02253	-3.091	-11.2403	-10.7822	-11.8795	-1.50323	-1.21496	-1.29435	-3.08587	-3.27698	-2.90749	-10.1826	-10.7697	-10.8426	-2.03447	-1.50259	-2.61574	-3.38485	-10.0083	-1.35084	-3.13541	-11.7254	-1.35124	-3.8541	-3.68024	-3.83926	-16.2426	-10.9652	-8.26926	-1.49368	-1.54737	-1.36047	-4.08091	-3.77684	-4.04439	-16.3564	-10.5735	-8.70297	-1.52094
216.1	-3.06056	-2.60645	-2.52094	-14.5193	-12.4967	-9.98038	-2.23325	-1.40894	-0.858641	-3.00692	-2.9601	-3.08668	-11.2387	-10.7248	-11.929	-1.55067	-1.19183	-1.24906	-3.20495	-3.22858	-2.95821	-10.1929	-10.7709	-10.8692	-2.06924	-1.52844	-2.64432	-3.40512	-10.0882	-1.34805	-3.07183	-11.7069	-1.34428	-3.85403	-3.65994	-3.85804	-16.2345	-10.8776	-8.29007	-1.51744	-1.59296	-1.3707	-4.03132	-3.74959	-4.08544	-16.3323	-10.6307	-8.66991	-1.52363
216	-2.95928	-2.60429	-2.42921	-14.4711	-12.4987	-9.98058	-2.26054	-1.36454	-0.888348	-2.99319	-2.97759	-3.10192	-11.2112	-10.6848	-11.9314	-1.59668	-1.19684	-1.23064	-3.17687	-3.24894	-2.97427	-10.1276	-10.8117	-10.8311	-2.07275	-1.5598	-2.61295	-3.42514	-10.1248	-1.2741	-3.07418	-11.6671	-1.34559	-3.91989	-3.69785	-3.74207	-16.25	-10.9109	-8.27901	-1.43572	-1.6322	-1.33831	-4.06798	-3.70309	-4.05902	-16.3462	-10.671	-8.72604	-1.50004
215.9	-2.92295	-2.62329	-2.43349	-14.5079	-12.5224	-9.95893	-2.2757	-1.39187	-0.889981	-3.00768	-3.04546	-3.08636	-11.1639	-10.7178	-11.9065	-1.6195	-1.12227	-1.19356	-3.19337	-3.20215	-2.97821	-10.0612	-10.7975	-10.7895	-2.05384	-1.57835	-2.65061	-3.42621	-10.1474	-1.23466	-3.0911	-11.6496	-1.3409	-3.94122	-3.70819	-3.75918	-16.2085	-10.9799	-8.27249	-1.45939	-1.608	-1.32064	-4.07341	-3.75462	-4.05554	-16.3453	-10.6828	-8.69322	-1.49267
215.8	-2.86041	-2.63317	-2.43756	-14.5529	-12.4542	-10.0356	-2.34323	-1.36392	-0.874432	-3.00726	-3.0296	-3.0916	-11.1912	-10.6908	-11.8232	-1.63365	-1.13057	-1.1945	-3.22858	-3.20902	-3.04182	-10.0962	-10.7415	-10.8004	-2.04084	-1.55713	-2.61618	-3.47698	-10.1424	-1.29928	-3.12416	-11.6246	-1.32307	-3.93732	-3.74024	-3.75533	-16.1618	-10.9254	-8.28408	-1.53256	-1.62589	-1.34982	-4.07484	-3.68932	-4.05491	-16.3127	-10.6162	-8.713	-1.47359
215.7	-2.8679	-2.62954	-2.50776	-14.4552	-12.4778	-10.0092	-2.23316	-1.40914	-0.897674	-2.9488	-3.06495	-3.12252	-11.1691	-10.6546	-11.8055	-1.67354	-1.14807	-1.18267	-3.19973	-3.25512	-3.05992	-10.1233	-10.7743	-10.7675	-2.06911	-1.56081	-2.64296	-3.48535	-10.0892	-1.32839	-3.13267	-11.5242	-1.34668	-4.01607	-3.75607	-3.72107	-16.1429	-10.8715	-8.23545	-1.51356	-1.65684	-1.36015	-4.11274	-3.76954	-3.99951	-16.1998	-10.5653	-8.70312	-1.43274
215.6	-2.88472	-2.59768	-2.4928	-14.4738	-12.5146	-10.0012	-2.15135	-1.45093	-0.902916	-2.98601	-3.06496	-3.11049	-11.1915	-10.6488	-11.8033	-1.71439	-1.13263	-1.18541	-3.16311	-3.27375	-3.11669	-10.0377	-10.7715	-10.7627	-2.09811	-1.56989	-2.6845	-3.46845	-10.075	-1.35078	-3.16625	-11.5559	-1.28163	-4.08307	-3.79556	-3.69119	-16.0796	-10.8391	-8.21037	-1.48135	-1.67773	-1.32992	-4.16949	-3.7603	-3.99037	-16.2205	-10.583	-8.66755	-1.39799
215.5	-2.82721	-2.63902	-2.46941	-14.4461	-12.5948	-9.93407	-2.12503	-1.45239	-0.887011	-3.10034	-3.13561	-3.0714	-11.2507	-10.6308	-11.9097	-1.70211	-1.06059	-1.15868	-3.1969	-3.28498	-3.16503	-9.9697	-10.7088	-10.7622	-2.15169	-1.61681	-2.68447	-3.43119	-10.0917	-1.39476	-3.20304	-11.4834	-1.21758	-4.12446	-3.88597	-3.71073	-15.9837	-10.8321	-8.21063	-1.57948	-1.65721	-1.29921	-4.16579	-3.77112	-3.99783	-16.1743	-10.5273	-8.64907	-1.37564
215.4	-2.74693	-2.67318	-2.57587	-14.4331	-12.5314	-9.91225	-2.19161	-1.48557	-0.868638	-3.16913	-3.13907	-3.10343	-11.2743	-10.5902	-11.9348	-1.65097	-1.07859	-1.09454	-3.20435	-3.3278	-3.24445	-9.92991	-10.7124	-10.8059	-2.16768	-1.53839	-2.64564	-3.44426	-10.1472	-1.34768	-3.18395	-11.4847	-1.24305	-4.18214	-3.95539	-3.72581	-16.0214	-10.8828	-8.24959	-1.58143	-1.70977	-1.29318	-4.17469	-3.77042	-4.04012	-16.1626	-10.5539	-8.71021	-1.36859
215.3	-2.6994	-2.68253	-2.58709	-14.4675	-12.5915	-9.89566	-2.21479	-1.46203	-0.90021	-3.16088	-3.1634	-3.12144	-11.3075	-10.6035	-11.9074	-1.66214	-1.07469	-1.10569	-3.20288	-3.3477	-3.24786	-9.8704	-10.7096	-10.808	-2.19722	-1.53446	-2.67263	-3.46017	-10.1116	-1.38128	-3.16142	-11.5157	-1.25484	-4.21802	-4.04055	-3.75029	-16.0951	-10.8395	-8.22267	-1.6258	-1.75861	-1.30004	-4.16744	-3.81219	-4.01033	-16.1418	-10.5246	-8.76119	-1.36386
215.2	-2.69392	-2.69424	-2.63634	-14.4203	-12.5482	-9.90128	-2.26349	-1.50295	-0.891619	-3.1924	-3.21098	-3.20878	-11.2742	-10.5978	-11.9192	-1.60449	-1.10703	-1.12758	-3.24932	-3.35423	-3.25692	-9.7115	-10.6784	-10.8302	-2.20456	-1.54092	-2.64602	-3.56208	-10.1218	-1.33937	-3.17641	-11.5611	-1.28243	-4.25539	-3.99259	-3.75406	-16.1335	-10.8364	-8.14869	-1.61812	-1.74401	-1.3088	-4.218	-3.83003	-4.05361	-16.2005	-10.5295	-8.8122	-1.32157
215.1	-2.65694	-2.71775	-2.59251	-14.4393	-12.5089	-9.93346	-2.33895	-1.50515	-0.972336	-3.22962	-3.19357	-3.23008	-11.3061	-10.5433	-11.895	-1.62986	-1.08453	-1.17366	-3.20918	-3.40953	-3.28894	-9.75865	-10.742	-10.8051	-2.20454	-1.50295	-2.68887	-3.60409	-10.0955	-1.31032	-3.26555	-11.5149	-1.2968	-4.36571	-4.00744	-3.75851	-16.2396	-10.8445	-8.12383	-1.67166	-1.76302	-1.31239	-4.27962	-3.85409	-4.07274	-16.1482	-10.5117	-8.80146	-1.301
215	-2.64739	-2.72875	-2.60876	-14.4625	-12.4632	-9.9712	-2.27281	-1.53734	-0.969513	-3.20952	-3.23594	-3.23258	-11.3235	-10.5557	-11.8986	-1.63882	-1.10368	-1.18166	-3.193	-3.4633	-3.29614	-9.6027	-10.6985	-10.6642	-2.15178	-1.49111	-2.6994	-3.56199	-10.064	-1.34492	-3.3048	-11.5313	-1.29516	-4.33925	-4.00449	-3.76856	-16.1549	-10.8507	-8.11613	-1.69883	-1.76315	-1.28691	-4.24899	-3.93235	-4.07959	-16.2006	-10.4723	-8.88939	-1.28087
214.9	-2.6794	-2.64163	-2.65257	-14.3755	-12.4917	-9.97784	-2.27184	-1.58524	-0.95453	-3.17494	-3.26881	-3.29596	-11.3638	-10.6151	-11.9346	-1.63625	-1.12074	-1.1426	-3.23155	-3.49307	-3.35804	-9.55717	-10.7185	-10.6512	-2.14193	-1.47954	-2.72502	-3.54607	-10.0555	-1.30795	-3.29626	-11.5522	-1.26531	-4.38609	-3.99597	-3.77315	-16.2059	-10.8236	-8.11544	-1.66745	-1.79949	-1.24336	-4.32516	-3.93035	-4.07007	-16.1435	-10.5095	-8.96255	-1.28284
214.8	-2.72467	-2.65111	-2.67301	-14.3905	-12.4733	-10.01	-2.26078	-1.63723	-0.864433	-3.21304	-3.27664	-3.36063	-11.3728	-10.6876	-11.9159	-1.62103	-1.14088	-1.15461	-3.24312	-3.51207	-3.37551	-9.46041	-10.6676	-10.6422	-2.16482	-1.46025	-2.79815	-3.5666	-10.0087	-1.30196	-3.37464	-11.624	-1.24876	-4.48281	-4.04296	-3.76495	-16.1149	-10.8695	-8.12039	-1.60909	-1.85053	-1.24732	-4.3781	-3.92934	-4.12271	-16.176	-10.4974	-8.93279	-1.31747
214.7	-2.77324	-2.58556	-2.71062	-14.4352	-12.4523	-10.07	-2.22856	-1.62154	-0.880833	-3.23118	-3.30536	-3.31647	-11.3698	-10.6937	-11.814	-1.66248	-1.14423	-1.15389	-3.26549	-3.48071	-3.47477	-9.4215	-10.6922	-10.6772	-2.13447	-1.51752	-2.80035	-3.59944	-9.99971	-1.3567	-3.3017	-11.5468	-1.26536	-4.49696	-4.09226	-3.84758	-16.0527	-10.8741	-8.10884	-1.68604	-1.80774	-1.21964	-4.34425	-3.9905	-4.10482	-16.207	-10.4639	-8.95803	-1.34903
214.6	-2.79368	-2.57792	-2.68024	-14.4116	-12.5233	-10.0477	-2.26902	-1.66566	-0.86391	-3.22481	-3.30857	-3.374	-11.3504	-10.6135	-11.7816	-1.67907	-1.14626	-1.16278	-3.22384	-3.51377	-3.50607	-9.42053	-10.661	-10.693	-2.17423	-1.51764	-2.84001	-3.64543	-9.9839	-1.33275	-3.28897	-11.5133	-1.32547	-4.49479	-4.12169	-3.85238	-16.0631	-10.9544	-8.15644	-1.64085	-1.84944	-1.24742	-4.32687	-4.00425	-4.11967	-16.1567	-10.379	-8.94661	-1.35479
214.5	-2.81115	-2.6463	-2.69307	-14.4443	-12.5177	-10.0605	-2.30806	-1.63032	-0.854455	-3.31778	-3.30444	-3.36015	-11.3347	-10.607	-11.7665	-1.75116	-1.13842	-1.21597	-3.20638	-3.59364	-3.55136	-9.33912	-10.6801	-10.7443	-2.16614	-1.5319	-2.81965	-3.66075	-10.0478	-1.32241	-3.31171	-11.5458	-1.34232	-4.54852	-4.14957	-3.87907	-16.0713	-10.8833	-8.22017	-1.64578	-1.88355	-1.28154	-4.36247	-4.01121	-4.07076	-16.064	-10.3784	-9.05564	-1.39204
214.4	-2.78093	-2.71569	-2.73232	-14.4567	-12.469	-10.0484	-2.29433	-1.64093	-0.955129	-3.35138	-3.35363	-3.36798	-11.3608	-10.6697	-11.8427	-1.80723	-1.13644	-1.23873	-3.29807	-3.60929	-3.47448	-9.31198	-10.6647	-10.8214	-2.1509	-1.49509	-2.747	-3.69993	-10.0341	-1.32219	-3.26382	-11.5251	-1.35818	-4.57001	-4.15831	-3.89618	-16.0261	-10.8618	-8.24266	-1.70882	-1.83998	-1.24206	-4.40493	-4.0518	-4.04573	-16.1211	-10.3217	-9.02204	-1.37612
214.3	-2.74196	-2.6818	-2.72015	-14.4101	-12.4962	-10.0841	-2.3178	-1.68032	-0.925462	-3.40449	-3.39314	-3.34902	-11.3515	-10.6294	-11.7629	-1.83195	-1.15873	-1.25005	-3.32978	-3.62095	-3.45215	-9.26248	-10.7178	-10.7535	-2.18185	-1.49107	-2.72185	-3.78612	-10.0367	-1.38664	-3.2672	-11.5585	-1.36109	-4.70534	-4.15118	-3.90618	-16.0338	-10.8535	-8.22071	-1.75125	-1.8501	-1.24465	-4.40531	-4.08482	-4.04543	-16.0348	-10.3236	-9.0192	-1.38275
214.2	-2.70259	-2.71973	-2.68655	-14.3384	-12.4456	-10.1048	-2.32372	-1.66129	-0.911407	-3.39022	-3.4178	-3.31408	-11.4513	-10.6709	-11.8171	-1.86346	-1.13617	-1.27493	-3.38318	-3.59914	-3.45369	-9.21606	-10.6358	-10.7934	-2.18932	-1.52774	-2.75076	-3.81026	-10.0601	-1.40365	-3.28114	-11.6124	-1.36012	-4.72829	-4.14644	-3.93331	-16.0546	-10.8715	-8.22423	-1.77613	-1.83547	-1.27417	-4.39556	-4.15048	-4.12455	-16.0874	-10.3058	-9.00997	-1.34414
214.1	-2.66964	-2.75201	-2.72119	-14.2477	-12.498	-10.1091	-2.28823	-1.66369	-1.00225	-3.38718	-3.48417	-3.31257	-11.3978	-10.6905	-11.8666	-1.83899	-1.10006	-1.27882	-3.43536	-3.61301	-3.47673	-9.22625	-10.6169	-10.8314	-2.29744	-1.52461	-2.71098	-3.82895	-10.0204	-1.38591	-3.36298	-11.6568	-1.39531	-4.71309	-4.23488	-3.98626	-16.0304	-10.9115	-8.30303	-1.80481	-1.85379	-1.31971	-4.4821	-4.1809	-4.19734	-15.9893	-10.3393	-9.03064	-1.40239
214	-2.64881	-2.75011	-2.78533	-14.3214	-12.5025	-10.1707	-2.30943	-1.66192	-1.0046	-3.39051	-3.44413	-3.36454	-11.3809	-10.6895	-11.8628	-1.85082	-1.12406	-1.26104	-3.404	-3.59348	-3.49563	-9.23854	-10.657	-10.7474	-2.28607	-1.55419	-2.72341	-3.85161	-10.0068	-1.41484	-3.37052	-11.6356	-1.45234	-4.85369	-4.29859	-4.04235	-16.1108	-10.8484	-8.31924	-1.77404	-1.87438	-1.29367	-4.5697	-4.19083	-4.19311	-15.8481	-10.3347	-8.98209	-1.41861
213.9	-2.70554	-2.7582	-2.82445	-14.3894	-12.5205	-10.2608	-2.33542	-1.64951	-1.09001	-3.40695	-3.50244	-3.47965	-11.4051	-10.7526	-11.8594	-1.87885	-1.09739	-1.30314	-3.44807	-3.58493	-3.54662	-9.25882	-10.6451	-10.6942	-2.24258	-1.52726	-2.76415	-3.85832	-9.97757	-1.46633	-3.35187	-11.6474	-1.49654	-4.9496	-4.32667	-4.03219	-16.0559	-10.8685	-8.28117	-1.74667	-1.89687	-1.28311	-4.55727	-4.26899	-4.19557	-15.8364	-10.4059	-9.00299	-1.48547
213.8	-2.64645	-2.8048	-2.84358	-14.3389	-12.4616	-10.2619	-2.3652	-1.6386	-1.133	-3.4405	-3.46984	-3.53454	-11.4056	-10.736	-11.7939	-1.88956	-1.12268	-1.31738	-3.51108	-3.62176	-3.54756	-9.33875	-10.6767	-10.6002	-2.2787	-1.50223	-2.74536	-3.79813	-10.0651	-1.45456	-3.28957	-11.6273	-1.46031	-4.94856	-4.37512	-4.09956	-16.0578	-10.8828	-8.34057	-1.70912	-1.85252	-1.29325	-4.58625	-4.27687	-4.21684	-15.7533	-10.3687	-9.02563	-1.50442
213.7	-2.68741	-2.77082	-2.86803	-14.3167	-12.4913	-10.2889	-2.4139	-1.64571	-1.07408	-3.47965	-3.50088	-3.59617	-11.4412	-10.7402	-11.8695	-1.86059	-1.1557	-1.37502	-3.53107	-3.69067	-3.56356	-9.38877	-10.6873	-10.6965	-2.26172	-1.50584	-2.76454	-3.80899	-10.0529	-1.40335	-3.27148	-11.5926	-1.48036	-4.92942	-4.41515	-4.11366	-15.9972	-10.8382	-8.3693	-1.6855	-1.82593	-1.33323	-4.68094	-4.27608	-4.22127	-15.7402	-10.3944	-9.01856	-1.51345
213.6	-2.69263	-2.84021	-2.90221	-14.3093	-12.4729	-10.293	-2.39957	-1.62028	-1.07651	-3.54107	-3.55963	-3.6465	-11.4945	-10.6251	-11.9384	-1.87404	-1.13778	-1.35749	-3.52845	-3.69151	-3.63828	-9.35994	-10.7257	-10.6875	-2.29308	-1.55854	-2.7938	-3.81756	-10.0913	-1.42793	-3.33526	-11.6504	-1.48419	-4.95951	-4.46989	-4.21288	-16.0244	-10.8851	-8.33012	-1.71895	-1.85125	-1.37418	-4.7413	-4.31235	-4.24898	-15.6492	-10.3843	-9.03471	-1.57371
213.5	-2.73558	-2.9142	-2.98618	-14.2632	-12.526	-10.3015	-2.46498	-1.63203	-1.05865	-3.50247	-3.6159	-3.66812	-11.4915	-10.5882	-11.8956	-1.8796	-1.14218	-1.32101	-3.6083	-3.79124	-3.66986	-9.2979	-10.6944	-10.689	-2.33698	-1.53678	-2.79849	-3.82813	-10.1527	-1.42242	-3.34354	-11.6515	-1.46498	-4.98389	-4.47354	-4.23176	-16.1257	-10.8864	-8.34386	-1.77102	-1.81412	-1.34541	-4.83821	-4.30532	-4.27293	-15.6235	-10.3728	-9.05075	-1.58401
213.4	-2.83561	-2.97254	-3.07393	-14.3067	-12.5394	-10.3217	-2.46898	-1.59751	-1.0932	-3.53462	-3.64715	-3.67626	-11.4984	-10.6106	-11.8664	-1.88519	-1.21203	-1.30175	-3.68792	-3.74892	-3.76486	-9.39682	-10.7391	-10.7749	-2.30786	-1.56148	-2.76116	-3.85049	-10.0906	-1.37916	-3.32402	-11.6443	-1.48175	-5.05345	-4.35972	-4.2695	-16.2249	-10.8969	-8.34174	-1.81464	-1.86668	-1.26037	-4.82959	-4.3795	-4.27473	-15.6106	-10.4652	-9.10167	-1.58893
213.3	-2.86572	-2.99138	-3.08581	-14.3072	-12.5515	-10.3543	-2.51952	-1.58251	-1.1201	-3.54835	-3.64366	-3.68635	-11.6154	-10.672	-11.8893	-1.86087	-1.17827	-1.36393	-3.78208	-3.77746	-3.83064	-9.31093	-10.7682	-10.7162	-2.27446	-1.54566	-2.75466	-3.91561	-10.1737	-1.38835	-3.30729	-11.6302	-1.54859	-5.08309	-4.3655	-4.28181	-16.3161	-10.9542	-8.39041	-1.85389	-1.9146	-1.23959	-4.87054	-4.47755	-4.30071	-15.6406	-10.5045	-9.05141	-1.60926
213.2	-2.91377	-3.02794	-3.08103	-14.2751	-12.5612	-10.2848	-2.56485	-1.63777	-1.05715	-3.61793	-3.64436	-3.7142	-11.773	-10.659	-11.8934	-1.82652	-1.1645	-1.36105	-3.81798	-3.73223	-3.89433	-9.2561	-10.7637	-10.7644	-2.25643	-1.59246	-2.83348	-3.9402	-10.1884	-1.33309	-3.38311	-11.6191	-1.52964	-5.14002	-4.37949	-4.33795	-16.369	-10.9884	-8.52158	-1.81513	-1.94895	-1.29076	-4.96709	-4.48057	-4.3125	-15.6849	-10.6257	-9.1142	-1.60326
213.1	-3.00103	-3.00489	-3.18407	-14.2746	-12.5523	-10.3017	-2.59424	-1.65421	-1.07315	-3.71803	-3.67677	-3.69971	-11.7229	-10.7171	-11.7965	-1.80988	-1.17451	-1.38587	-3.88675	-3.76249	-3.89088	-9.18176	-10.7978	-10.7078	-2.33907	-1.58701	-2.81704	-3.9235	-10.1926	-1.33458	-3.41089	-11.6555	-1.46229	-5.18881	-4.41237	-4.34004	-16.4149	-10.9919	-8.58651	-1.85962	-1.96537	-1.31103	-5.01607	-4.52505	-4.30538	-15.648	-10.6219	-9.12711	-1.59873
213	-3.02241	-2.99824	-3.21292	-14.313	-12.631	-10.3086	-2.65908	-1.67009	-1.05407	-3.75564	-3.70586	-3.75731	-11.7225	-10.7816	-11.7878	-1.77609	-1.17658	-1.35813	-3.86668	-3.79616	-3.88275	-9.1515	-10.8705	-10.7187	-2.36007	-1.61743	-2.84985	-3.91393	-10.186	-1.34887	-3.49215	-11.6269	-1.51568	-5.28474	-4.43341	-4.37047	-16.4159	-11.0518	-8.58797	-1.91115	-1.94164	-1.29047	-5.08891	-4.48388	-4.35441	-15.5547	-10.5879	-9.14751	-1.59144
212.9	-3.04651	-3.02735	-3.24125	-14.4035	-12.6732	-10.3282	-2.6789	-1.6351	-1.04588	-3.80668	-3.73995	-3.78808	-11.769	-10.8168	-11.7857	-1.73559	-1.19475	-1.36833	-3.84776	-3.84628	-3.91018	-9.14232	-10.8829	-10.6612	-2.32513	-1.59826	-2.80972	-3.92507	-10.1559	-1.32963	-3.53061	-11.6393	-1.41622	-5.29458	-4.51862	-4.35027	-16.4388	-11.0068	-8.61387	-1.94123	-1.89036	-1.31603	-5.0971	-4.51947	-4.36607	-15.4218	-10.5842	-9.18137	-1.59711
212.8	-3.1012	-3.11335	-3.28404	-14.4409	-12.7332	-10.4412	-2.73085	-1.65597	-1.14279	-3.79929	-3.80868	-3.87864	-11.7779	-10.8832	-11.7759	-1.75463	-1.19738	-1.39368	-3.81459	-3.8941	-3.88113	-9.13722	-10.8895	-10.6733	-2.40051	-1.6061	-2.83201	-3.9439	-10.1724	-1.3268	-3.60845	-11.7166	-1.49466	-5.36701	-4.63395	-4.38067	-16.5169	-11.1476	-8.64127	-1.97822	-1.8925	-1.28956	-5.22764	-4.54963	-4.3954	-15.374	-10.6028	-9.21266	-1.58634
212.7	-3.17703	-3.20634	-3.36752	-14.5394	-12.7963	-10.4985	-2.75912	-1.66267	-1.12179	-3.77795	-3.86804	-3.88932	-11.836	-10.9158	-11.7373	-1.78036	-1.21294	-1.45124	-3.85448	-3.92645	-3.92873	-9.15956	-10.8777	-10.7283	-2.43455	-1.51325	-2.87605	-3.97631	-10.1766	-1.36148	-3.59717	-11.7196	-1.49372	-5.34696	-4.58516	-4.44217	-16.5397	-11.1114	-8.76213	-2.0349	-1.8153	-1.3368	-5.27169	-4.54283	-4.37272	-15.3351	-10.5422	-9.18551	-1.6447
212.6	-3.2471	-3.27217	-3.43103	-14.5322	-12.8648	-10.5098	-2.78432	-1.69825	-1.14844	-3.81039	-3.87752	-3.90908	-11.9105	-10.9348	-11.7741	-1.77336	-1.33041	-1.49158	-3.86276	-3.94365	-3.91443	-9.13555	-10.87	-10.7239	-2.47909	-1.5947	-2.88064	-4.00028	-10.1746	-1.37926	-3.64945	-11.8162	-1.50521	-5.35953	-4.59568	-4.50281	-16.6225	-11.15	-8.82567	-2.06424	-1.85052	-1.3538	-5.35398	-4.55869	-4.35999	-15.2439	-10.5764	-9.20555	-1.68515
212.5	-3.27525	-3.2736	-3.46645	-14.5828	-12.8575	-10.5019	-2.76623	-1.74149	-1.16547	-3.90932	-3.96258	-3.988	-11.9752	-10.9417	-11.9077	-1.81421	-1.31081	-1.50803	-3.93305	-3.99029	-3.91623	-9.16331	-10.781	-10.7324	-2.47748	-1.62561	-2.88843	-4.12772	-10.154	-1.38188	-3.73917	-11.8351	-1.51719	-5.36067	-4.60429	-4.56831	-16.6191	-11.1749	-8.7726	-2.10181	-1.8728	-1.29257	-5.43008	-4.64118	-4.35877	-15.2908	-10.6181	-9.26331	-1.72408
212.4	-3.37181	-3.36071	-3.49161	-14.6925	-12.8193	-10.6424	-2.81115	-1.77598	-1.16167	-3.95592	-3.97545	-4.01494	-12.0248	-10.9159	-11.9922	-1.71876	-1.34484	-1.51558	-3.99461	-4.07839	-3.918	-9.24886	-10.8255	-10.7043	-2.50509	-1.63516	-2.9176	-4.23077	-10.1436	-1.38989	-3.75655	-11.9069	-1.5278	-5.36218	-4.62893	-4.5943	-16.7252	-11.3155	-8.79892	-2.12686	-1.87045	-1.33902	-5.48995	-4.67285	-4.44782	-15.3007	-10.6799	-9.38141	-1.74854
212.3	-3.44077	-3.39286	-3.47868	-14.6698	-12.8117	-10.7015	-2.94526	-1.7814	-1.17536	-3.91904	-3.97319	-4.09614	-12.0488	-10.978	-12.0175	-1.70591	-1.34865	-1.5378	-4.02866	-4.08528	-3.98092	-9.25204	-10.8355	-10.7168	-2.50906	-1.64934	-2.95476	-4.29635	-10.2043	-1.34879	-3.82571	-12.0137	-1.55141	-5.44315	-4.65136	-4.7215	-16.8773	-11.3441	-8.81768	-2.06883	-1.93285	-1.32327	-5.59974	-4.72489	-4.43459	-15.2608	-10.6645	-9.46709	-1.74056
212.2	-3.47757	-3.41738	-3.56131	-14.6424	-12.7889	-10.725	-2.97374	-1.80874	-1.1893	-3.95798	-3.99783	-4.09222	-12.1175	-10.9595	-11.978	-1.72784	-1.38785	-1.56808	-4.05502	-4.10423	-3.9687	-9.22805	-10.8922	-10.6941	-2.48255	-1.63556	-2.97209	-4.34513	-10.2441	-1.36027	-3.86724	-12.0589	-1.52494	-5.53714	-4.62612	-4.7633	-16.9531	-11.4286	-8.86243	-2.0254	-1.96842	-1.27787	-5.6047	-4.82234	-4.51273	-15.1829	-10.7458	-9.53096	-1.72051
212.1	-3.58264	-3.45681	-3.55317	-14.6331	-12.854	-10.7608	-2.9693	-1.8418	-1.21469	-4.01077	-4.03218	-4.08772	-12.1011	-10.9612	-11.992	-1.77187	-1.34589	-1.59058	-4.12247	-4.06668	-3.96167	-9.18803	-10.9341	-10.6139	-2.49726	-1.6407	-2.98602	-4.39592	-10.2408	-1.42276	-3.89478	-12.0323	-1.58826	-5.58501	-4.65652	-4.78993	-16.9968	-11.4476	-8.8881	-2.01118	-2.02096	-1.26999	-5.65867	-4.91013	-4.54307	-15.1557	-10.7075	-9.5715	-1.6937
212	-3.60477	-3.55125	-3.56673	-14.6614	-12.8973	-10.7378	-2.98326	-1.87194	-1.24262	-3.99385	-4.04475	-4.12143	-12.1641	-10.9436	-12.0227	-1.83547	-1.34001	-1.61741	-4.12649	-4.13905	-3.95949	-9.27693	-10.8815	-10.5731	-2.52015	-1.6923	-3.05712	-4.41629	-10.3156	-1.39519	-3.92341	-12.0888	-1.64187	-5.6749	-4.65779	-4.81274	-16.9914	-11.5423	-9.00972	-2.05246	-2.00214	-1.30132	-5.83116	-4.90496	-4.63978	-15.1166	-10.699	-9.61015	-1.71175
211.9	-3.67111	-3.57	-3.5354	-14.8021	-12.9203	-10.7417	-3.01313	-1.88598	-1.25741	-3.9971	-4.0117	-4.14308	-12.2273	-10.9568	-12.0764	-1.83024	-1.38185	-1.60048	-4.19808	-4.19052	-3.99689	-9.34238	-10.9549	-10.617	-2.53249	-1.6585	-3.1366	-4.40748	-10.3634	-1.47106	-3.92309	-12.0915	-1.65778	-5.61102	-4.73109	-4.84372	-17.0063	-11.6428	-9.07187	-2.1321	-1.97984	-1.29903	-5.8667	-4.95375	-4.66422	-15.0654	-10.686	-9.66077	-1.74111
211.8	-3.69106	-3.59746	-3.58532	-14.8784	-12.9429	-10.75	-3.04537	-1.90854	-1.24384	-4.03295	-4.04597	-4.22511	-12.1871	-11.0118	-12.1069	-1.79409	-1.42669	-1.61108	-4.29988	-4.1695	-4.0016	-9.29497	-10.9246	-10.6574	-2.56499	-1.7237	-3.14826	-4.46257	-10.4191	-1.49469	-3.94257	-12.1507	-1.62901	-5.60736	-4.74054	-4.8894	-16.9765	-11.6468	-9.10595	-2.13364	-1.97292	-1.27275	-5.86309	-4.92555	-4.67971	-15.0172	-10.6995	-9.74581	-1.71696
211.7	-3.73565	-3.64697	-3.68093	-14.8897	-13.009	-10.7465	-3.03905	-1.90833	-1.20794	-4.07877	-4.04792	-4.29271	-12.186	-11.041	-12.0834	-1.79012	-1.42097	-1.6234	-4.32631	-4.21127	-4.03037	-9.33318	-10.9871	-10.7172	-2.62013	-1.73866	-3.23992	-4.53472	-10.4496	-1.52116	-3.94192	-12.137	-1.7055	-5.6613	-4.7807	-5.0178	-17.0054	-11.6733	-9.08448	-2.14331	-1.98238	-1.2887	-5.98618	-5.00031	-4.70621	-14.9546	-10.7371	-9.8061	-1.79863
211.6	-3.74757	-3.64674	-3.70069	-14.9771	-13.0229	-10.7495	-3.04743	-1.846	-1.2984	-4.14183	-4.04881	-4.31069	-12.1523	-11.0497	-12.1262	-1.79665	-1.45551	-1.65193	-4.35351	-4.18846	-4.09459	-9.38074	-11.0186	-10.7189	-2.62033	-1.74287	-3.25878	-4.61335	-10.4795	-1.55676	-4.00688	-12.2028	-1.71535	-5.81167	-4.80653	-5.06057	-17.014	-11.7762	-9.13011	-2.156	-2.01474	-1.29803	-6.04832	-5.1065	-4.69031	-14.9739	-10.6987	-9.75804	-1.80676
211.5	-3.7874	-3.73393	-3.78026	-14.9983	-13.0042	-10.7554	-3.0278	-1.80302	-1.39897	-4.19447	-4.05174	-4.33505	-12.1836	-11.0571	-12.1861	-1.76149	-1.51298	-1.67117	-4.37197	-4.28986	-4.10471	-9.50696	-10.9814	-10.6849	-2.58958	-1.76852	-3.25995	-4.62662	-10.4857	-1.53145	-4.05064	-12.1974	-1.67569	-5.86115	-4.82791	-5.01463	-17.1026	-11.8514	-9.15609	-2.24395	-2.08712	-1.34203	-6.03162	-5.15558	-4.73385	-14.9683	-10.8329	-9.7687	-1.81166
211.4	-3.86282	-3.80081	-3.78659	-15.0227	-13.047	-10.7583	-2.97824	-1.87042	-1.50629	-4.30585	-4.10469	-4.36534	-12.2367	-11.1208	-12.2228	-1.71706	-1.52214	-1.70097	-4.41382	-4.39737	-4.1398	-9.48174	-10.9774	-10.6479	-2.56854	-1.82507	-3.32385	-4.67036	-10.4404	-1.49337	-4.12099	-12.2671	-1.64927	-5.91616	-4.7658	-5.03856	-17.2475	-11.8929	-9.26001	-2.25317	-2.08511	-1.40649	-6.11586	-5.19223	-4.74609	-14.9786	-10.8012	-9.78474	-1.87619
211.3	-3.90001	-3.89452	-3.8593	-15.0597	-13.0736	-10.7418	-3.09878	-1.86244	-1.52057	-4.39738	-4.1494	-4.39303	-12.2876	-11.206	-12.2999	-1.77833	-1.54771	-1.7553	-4.40885	-4.44402	-4.11604	-9.46893	-11.0016	-10.6177	-2.51553	-1.83011	-3.35475	-4.65049	-10.5505	-1.54188	-4.20777	-12.3023	-1.65334	-6.05202	-4.76053	-5.04439	-17.278	-11.8767	-9.26501	-2.27619	-2.07129	-1.40132	-6.19023	-5.21112	-4.88559	-14.9504	-10.9226	-9.81431	-1.83731
211.2	-3.92668	-3.91523	-3.90732	-15.1154	-13.2539	-10.8122	-3.02414	-1.84796	-1.59133	-4.41667	-4.21721	-4.46946	-12.3159	-11.2368	-12.42	-1.79276	-1.61134	-1.78189	-4.55641	-4.47698	-4.21331	-9.54801	-11.014	-10.5951	-2.46807	-1.85012	-3.42169	-4.7628	-10.5806	-1.58468	-4.23978	-12.325	-1.66749	-6.18123	-4.78958	-5.06502	-17.4421	-11.8997	-9.24908	-2.29536	-2.03483	-1.37837	-6.29442	-5.27225	-4.95637	-14.9378	-10.9105	-9.87685	-1.8254
211.1	-3.98903	-3.97823	-3.96138	-15.1383	-13.3255	-10.8884	-3.02249	-1.85115	-1.5663	-4.4771	-4.24571	-4.53411	-12.3589	-11.2193	-12.365	-1.77438	-1.64976	-1.84059	-4.55947	-4.56757	-4.36274	-9.51368	-11.1137	-10.571	-2.4743	-1.86715	-3.56725	-4.87233	-10.6734	-1.52515	-4.33744	-12.2856	-1.63354	-6.26585	-4.94752	-5.1562	-17.5717	-11.9011	-9.27387	-2.3073	-2.02663	-1.40504	-6.42616	-5.30798	-5.03848	-14.7844	-11.0897	-9.89984	-1.868
211	-4.06224	-4.04212	-4.0008	-15.1545	-13.3583	-10.8918	-3.08772	-1.8529	-1.66495	-4.5572	-4.34281	-4.60003	-12.3974	-11.2514	-12.4368	-1.78388	-1.68701	-1.87071	-4.63649	-4.61183	-4.48869	-9.46096	-11.116	-10.5694	-2.4807	-1.90866	-3.55989	-4.90894	-10.741	-1.44799	-4.44097	-12.2518	-1.76074	-6.29202	-4.97506	-5.1653	-17.6321	-11.9993	-9.41753	-2.34324	-2.01255	-1.43237	-6.52655	-5.33699	-5.19768	-14.8671	-11.0778	-9.92532	-1.89732
210.9	-4.11646	-4.03252	-4.0879	-15.1639	-13.3709	-10.9168	-3.15918	-1.87285	-1.70217	-4.61204	-4.37469	-4.72018	-12.379	-11.2435	-12.479	-1.6682	-1.73536	-1.87732	-4.66452	-4.63089	-4.55252	-9.45403	-11.1817	-10.5448	-2.52913	-1.86825	-3.53541	-4.98425	-10.7885	-1.47166	-4.46301	-12.3888	-1.79332	-6.38345	-5.03221	-5.1735	-17.767	-12.06	-9.48279	-2.33054	-2.04605	-1.5358	-6.60971	-5.35165	-5.23802	-14.7591	-11.0256	-9.9838	-1.89101
210.8	-4.17293	-4.05835	-4.16139	-15.2996	-13.4546	-10.9202	-3.22333	-1.91771	-1.6449	-4.71174	-4.42854	-4.79348	-12.3882	-11.2446	-12.5446	-1.66777	-1.81287	-1.91602	-4.64798	-4.68928	-4.64181	-9.43785	-11.1953	-10.5033	-2.53474	-1.87554	-3.58164	-5.05826	-10.9015	-1.48167	-4.4694	-12.3903	-1.76539	-6.54284	-5.01387	-5.27269	-17.9251	-12.0914	-9.44487	-2.34927	-2.08552	-1.46395	-6.69553	-5.45313	-5.24208	-14.7257	-10.9978	-10.0411	-1.85831
210.7	-4.25242	-4.10878	-4.15931	-15.3608	-13.495	-10.8935	-3.27121	-1.90926	-1.64913	-4.71345	-4.45695	-4.78117	-12.4848	-11.2716	-12.6104	-1.65654	-1.78594	-1.96598	-4.7065	-4.8216	-4.69098	-9.41519	-11.1465	-10.4937	-2.58674	-2.006	-3.64188	-5.11881	-10.9603	-1.46182	-4.54404	-12.4917	-1.75258	-6.62372	-5.04732	-5.31924	-18.0775	-12.1599	-9.55851	-2.41538	-2.14072	-1.52367	-6.80708	-5.56401	-5.32623	-14.7559	-10.9646	-10.1174	-1.82403
210.6	-4.27741	-4.13512	-4.18262	-15.3531	-13.5849	-10.9264	-3.33057	-1.97581	-1.62916	-4.78743	-4.50867	-4.77669	-12.5274	-11.2864	-12.6124	-1.64924	-1.81226	-1.93596	-4.74551	-4.89768	-4.80188	-9.38074	-11.1898	-10.5309	-2.56957	-2.04378	-3.61705	-5.1951	-11.0302	-1.53093	-4.60881	-12.5343	-1.72	-6.71142	-5.0672	-5.39169	-18.1599	-12.24	-9.55918	-2.42242	-2.16657	-1.53473	-6.87557	-5.59418	-5.34587	-14.7402	-10.9712	-10.1601	-1.8337
210.5	-4.3999	-4.24746	-4.26239	-15.3897	-13.6149	-11.0392	-3.34209	-2.06734	-1.62627	-4.85676	-4.58863	-4.77599	-12.5445	-11.3823	-12.684	-1.67434	-1.80863	-1.98511	-4.76237	-4.89121	-4.87736	-9.29304	-11.2409	-10.6081	-2.67096	-2.10077	-3.69157	-5.36541	-11.0273	-1.65486	-4.67311	-12.5841	-1.77527	-6.8355	-5.11605	-5.42264	-18.2858	-12.3612	-9.52175	-2.39074	-2.22909	-1.56314	-6.95704	-5.70612	-5.3987	-14.7333	-11.0174	-10.1546	-1.81074
210.4	-4.48065	-4.24301	-4.32584	-15.4274	-13.6126	-11.0436	-3.37653	-2.08549	-1.63076	-4.91332	-4.66096	-4.79922	-12.615	-11.517	-12.6428	-1.66038	-1.8707	-1.97696	-4.82515	-4.84111	-4.9728	-9.36582	-11.3587	-10.631	-2.71302	-2.12064	-3.7778	-5.45546	-11.1781	-1.71887	-4.7432	-12.6039	-1.80249	-6.94696	-5.18023	-5.44985	-18.432	-12.353	-9.61215	-2.42996	-2.25653	-1.5874	-7.06232	-5.75841	-5.38667	-14.6966	-11.0013	-10.2837	-1.84974
210.3	-4.52991	-4.31016	-4.39011	-15.572	-13.6704	-11.0886	-3.4181	-2.0932	-1.65862	-5.01463	-4.67742	-4.83696	-12.689	-11.6019	-12.6677	-1.66919	-1.84308	-2.00589	-4.89916	-4.85559	-5.0473	-9.41415	-11.3036	-10.65	-2.81554	-2.18451	-3.80075	-5.5507	-11.2365	-1.76158	-4.76704	-12.6451	-1.80646	-7.06146	-5.18919	-5.51408	-18.5427	-12.3951	-9.71443	-2.41372	-2.30399	-1.62671	-7.19031	-5.77384	-5.45403	-14.7328	-11.0193	-10.3161	-1.81235
210.2	-4.62278	-4.33075	-4.38936	-15.6065	-13.7527	-11.1206	-3.44961	-2.10703	-1.7101	-5.04878	-4.67534	-4.86246	-12.7171	-11.6682	-12.6832	-1.66595	-1.80899	-2.06603	-4.94975	-4.94962	-5.03375	-9.41939	-11.3128	-10.6676	-2.83122	-2.18282	-3.89452	-5.60225	-11.3129	-1.858	-4.85136	-12.6212	-1.82589	-7.20041	-5.31967	-5.53194	-18.5483	-12.4795	-9.75117	-2.34397	-2.35038	-1.68941	-7.23962	-5.79529	-5.51468	-14.6892	-11.0318	-10.3519	-1.84058
210.1	-4.5937	-4.40019	-4.3778	-15.6966	-13.7662	-11.1424	-3.43107	-2.10912	-1.76936	-5.07553	-4.72977	-4.9253	-12.6371	-11.7354	-12.6776	-1.72461	-1.78032	-2.08668	-4.9009	-4.95997	-5.13649	-9.40953	-11.305	-10.7091	-2.82942	-2.21931	-4.00102	-5.66638	-11.3184	-1.8445	-4.98715	-12.6923	-1.83556	-7.2558	-5.46148	-5.60083	-18.6231	-12.4631	-9.76373	-2.33584	-2.29712	-1.62193	-7.36019	-5.84546	-5.60256	-14.7025	-10.9892	-10.4541	-1.85152
210	-4.5854	-4.46828	-4.49305	-15.749	-13.8053	-11.1111	-3.43848	-2.07992	-1.79482	-5.11711	-4.82017	-4.99688	-12.6855	-11.6826	-12.6655	-1.79822	-1.68274	-2.08839	-4.97346	-5.12823	-5.13802	-9.44546	-11.2837	-10.7503	-2.89194	-2.30101	-4.03631	-5.69324	-11.352	-1.85706	-5.06361	-12.7321	-1.76206	-7.37483	-5.56436	-5.68703	-18.7137	-12.4573	-9.77165	-2.36097	-2.34384	-1.65965	-7.44556	-5.93011	-5.68831	-14.6373	-11.0282	-10.4618	-1.85112
209.9	-4.52845	-4.54437	-4.57179	-15.7631	-13.7738	-11.1261	-3.4329	-2.11236	-1.95738	-5.15717	-4.93566	-5.10353	-12.759	-11.6405	-12.8415	-1.93302	-1.77524	-2.06235	-5.06283	-5.25267	-5.2736	-9.45907	-11.3247	-10.718	-2.95853	-2.33374	-4.05093	-5.79486	-11.3414	-1.92721	-5.16996	-12.8046	-1.7656	-7.53335	-5.67782	-5.7365	-18.7693	-12.5542	-9.73954	-2.47829	-2.39849	-1.73116	-7.63228	-5.97252	-5.79336	-14.4827	-10.9841	-10.5238	-1.89757
209.8	-4.56631	-4.61116	-4.52758	-15.7437	-13.7807	-11.1728	-3.40295	-2.06615	-2.02634	-5.19085	-4.96726	-5.1873	-12.805	-11.7148	-12.853	-1.93442	-1.76117	-2.13747	-5.11352	-5.2492	-5.37005	-9.48955	-11.2508	-10.6822	-2.88553	-2.38937	-4.15729	-5.88571	-11.4436	-1.97849	-5.1769	-12.8484	-1.75959	-7.62137	-5.72814	-5.77692	-18.7731	-12.5457	-9.81172	-2.53379	-2.37912	-1.75349	-7.8056	-6.06712	-5.88278	-14.5238	-10.9542	-10.513	-1.92196
209.7	-4.61589	-4.67155	-4.57448	-15.7041	-13.7769	-11.2321	-3.44625	-2.07461	-2.10306	-5.31174	-5.02897	-5.26462	-12.7866	-11.6981	-12.8287	-2.01769	-1.74224	-2.20487	-5.16899	-5.29399	-5.48961	-9.58318	-11.2052	-10.7251	-2.91581	-2.41781	-4.17199	-5.92465	-11.5162	-2.07975	-5.27991	-12.9158	-1.79912	-7.73066	-5.90221	-5.85603	-18.837	-12.6693	-9.83366	-2.54194	-2.4414	-1.75957	-7.96527	-6.1779	-5.9503	-14.625	-10.9363	-10.5705	-1.90927
209.6	-4.64683	-4.70191	-4.66759	-15.7058	-13.7659	-11.225	-3.41904	-2.09193	-2.09748	-5.33175	-5.08475	-5.37892	-12.8047	-11.7089	-12.7974	-2.06028	-1.7602	-2.27274	-5.21488	-5.3122	-5.60704	-9.55585	-11.1532	-10.7599	-2.94733	-2.47379	-4.19302	-5.96851	-11.5377	-2.08612	-5.4048	-12.911	-1.84672	-7.89477	-5.9636	-5.96442	-18.9351	-12.7458	-9.87495	-2.58586	-2.42079	-1.79465	-8.08908	-6.25862	-6.03132	-14.7076	-11.0268	-10.6232	-1.92316
209.5	-4.75392	-4.715	-4.70997	-15.6876	-13.7683	-11.2265	-3.49055	-2.12539	-2.0765	-5.45317	-5.13103	-5.42256	-12.8653	-11.7303	-12.8261	-2.04169	-1.81767	-2.3141	-5.33702	-5.38736	-5.70225	-9.58825	-11.222	-10.7103	-2.97071	-2.46823	-4.21756	-6.03328	-11.5311	-2.1112	-5.48924	-12.9368	-1.88748	-8.00857	-5.97979	-6.11813	-18.9686	-12.7938	-9.87192	-2.57727	-2.45787	-1.7918	-8.1638	-6.33917	-6.10198	-14.6972	-11.0512	-10.7205	-1.92278
209.4	-4.82395	-4.76779	-4.78821	-15.6571	-13.7722	-11.2512	-3.51854	-2.16057	-2.14106	-5.52298	-5.23843	-5.44973	-12.9216	-11.7822	-12.8358	-2.05112	-1.90241	-2.32758	-5.40983	-5.50132	-5.72955	-9.49547	-11.1917	-10.6553	-2.97537	-2.49783	-4.26648	-6.15939	-11.5483	-2.15078	-5.62618	-12.9555	-1.9378	-8.21239	-6.05521	-6.20051	-19.0341	-12.7617	-9.82378	-2.59209	-2.52589	-1.80487	-8.26211	-6.40042	-6.2784	-14.7562	-11.0398	-10.774	-1.88341
209.3	-4.92592	-4.84467	-4.86083	-15.6809	-13.8159	-11.291	-3.58983	-2.17269	-2.17133	-5.58755	-5.29968	-5.51915	-12.7755	-11.8639	-12.8909	-2.09954	-1.90526	-2.36714	-5.46755	-5.62168	-5.92885	-9.52595	-11.2008	-10.6698	-2.97898	-2.51897	-4.22462	-6.31077	-11.5791	-2.16824	-5.65457	-12.8442	-1.96043	-8.42072	-6.15031	-6.31027	-19.0757	-12.7915	-9.8739	-2.58575	-2.50315	-1.86302	-8.39138	-6.515	-6.48498	-14.6411	-11.0025	-10.8137	-1.9209
209.2	-4.98018	-4.97987	-4.87545	-15.635	-13.8901	-11.2783	-3.68019	-2.22556	-2.21621	-5.67302	-5.31409	-5.56472	-12.7931	-11.9207	-12.8937	-2.07378	-1.93139	-2.34226	-5.53413	-5.67919	-6.01917	-9.41126	-11.176	-10.661	-3.02017	-2.50281	-4.32392	-6.3176	-11.6069	-2.21065	-5.64586	-12.9444	-1.95473	-8.62084	-6.24914	-6.35545	-19.2317	-12.8739	-9.96279	-2.57119	-2.51909	-1.90754	-8.52898	-6.49644	-6.55936	-14.5478	-10.9702	-10.7554	-1.85018
209.1	-4.9642	-4.9889	-4.8703	-15.6633	-13.9179	-11.2216	-3.75303	-2.25287	-2.21479	-5.73457	-5.38695	-5.59435	-12.7848	-11.8934	-12.8284	-2.09425	-1.93245	-2.37313	-5.60758	-5.70521	-6.09441	-9.32471	-11.0961	-10.7109	-3.04174	-2.52254	-4.35728	-6.36837	-11.6313	-2.22395	-5.70868	-12.9034	-1.97758	-8.75517	-6.31312	-6.42342	-19.2617	-12.7833	-10.0103	-2.64657	-2.54254	-1.88451	-8.59823	-6.52798	-6.68091	-14.4694	-10.9746	-10.7769	-1.86749
209	-5.04129	-5.06267	-4.95393	-15.7142	-13.9707	-11.2274	-3.71432	-2.24012	-2.2637	-5.79909	-5.51644	-5.68124	-12.832	-11.92	-12.8335	-2.18747	-1.97618	-2.42965	-5.69635	-5.74695	-6.12199	-9.332	-11.0631	-10.5817	-3.11612	-2.51692	-4.43007	-6.4887	-11.6583	-2.26004	-5.71361	-12.8638	-2.05829	-8.94728	-6.31282	-6.52304	-19.2321	-12.8323	-10.0399	-2.70017	-2.57854	-1.91945	-8.68948	-6.53395	-6.79308	-14.4083	-10.9253	-10.7792	-1.93157
208.9	-5.11964	-5.12729	-5.01352	-15.752	-13.9919	-11.2163	-3.7524	-2.24817	-2.23734	-5.83448	-5.58381	-5.7908	-12.8072	-11.8643	-12.7836	-2.22903	-1.97746	-2.46486	-5.78028	-5.74856	-6.18496	-9.29841	-10.9715	-10.5367	-3.19597	-2.55332	-4.52577	-6.59636	-11.5307	-2.29327	-5.69814	-12.8238	-2.02399	-9.06144	-6.41671	-6.62232	-19.3309	-12.7771	-10.0357	-2.81029	-2.55161	-1.97848	-8.81923	-6.56905	-6.86815	-14.4453	-10.8378	-10.7596	-1.98446
208.8	-5.13141	-5.15601	-5.0389	-15.7532	-13.992	-11.1638	-3.77394	-2.20148	-2.26735	-5.82697	-5.68776	-5.88921	-12.7601	-11.936	-12.7839	-2.18851	-2.01177	-2.51867	-5.82204	-5.8756	-6.27851	-9.30964	-10.9036	-10.568	-3.25597	-2.5856	-4.5979	-6.61018	-11.5473	-2.31828	-5.76073	-12.8702	-1.98429	-9.21434	-6.49854	-6.68434	-19.3293	-12.787	-10.0527	-2.89848	-2.54114	-2.02525	-8.90066	-6.62615	-6.90097	-14.4352	-10.8766	-10.7548	-2.06445
208.7	-5.21562	-5.20484	-5.13576	-15.7752	-13.9664	-11.1714	-3.8535	-2.24368	-2.29485	-5.92757	-5.77407	-5.91933	-12.7416	-12.0293	-12.733	-2.19311	-2.05501	-2.51806	-5.90413	-5.92953	-6.36743	-9.28032	-10.9464	-10.5417	-3.31093	-2.6055	-4.65185	-6.70697	-11.546	-2.33338	-5.79298	-12.8585	-1.95073	-9.33377	-6.62081	-6.7968	-19.4273	-12.7059	-10.0371	-2.96986	-2.59493	-2.04744	-8.99763	-6.74374	-6.93486	-14.3435	-10.9713	-10.7017	-2.09565
208.6	-5.26419	-5.29827	-5.26578	-15.6839	-13.9728	-11.1288	-3.90405	-2.2707	-2.31143	-6.0647	-5.87117	-6.0124	-12.6836	-11.9805	-12.6954	-2.25046	-2.02938	-2.60619	-5.96619	-6.01951	-6.46347	-9.12362	-10.8302	-10.518	-3.3397	-2.67759	-4.66809	-6.75909	-11.512	-2.31554	-5.93584	-12.7905	-1.94878	-9.6051	-6.6657	-6.85074	-19.4345	-12.6563	-10.0982	-2.97413	-2.60083	-2.08076	-9.11782	-6.84344	-7.00852	-14.2189	-11.0115	-10.6904	-2.13053
208.5	-5.39829	-5.34475	-5.35419	-15.6238	-13.9438	-11.1848	-3.93085	-2.29443	-2.3542	-6.1978	-5.96348	-6.02609	-12.6847	-12.0351	-12.6947	-2.30331	-2.07534	-2.5923	-6.01083	-6.11742	-6.507	-9.12748	-10.8134	-10.4782	-3.38629	-2.7154	-4.68693	-6.78295	-11.4876	-2.3917	-5.9696	-12.7397	-1.99085	-9.64807	-6.80342	-6.94313	-19.4434	-12.6667	-10.2166	-3.03345	-2.64559	-2.07283	-9.30592	-6.96646	-7.10151	-14.1219	-10.9177	-10.6892	-2.17093
208.4	-5.53635	-5.37816	-5.38097	-15.6665	-13.891	-11.1719	-4.13163	-2.32494	-2.31992	-6.27516	-6.04727	-6.1216	-12.7551	-11.9814	-12.7136	-2.38059	-2.10074	-2.62616	-6.09009	-6.21849	-6.54733	-9.0556	-10.7361	-10.4279	-3.37979	-2.74247	-4.71949	-6.82192	-11.4329	-2.38016	-6.03687	-12.7214	-2.06557	-9.68687	-6.87982	-6.98849	-19.5206	-12.6327	-10.2141	-3.07519	-2.65189	-2.07608	-9.43958	-7.03554	-7.27517	-13.9882	-10.9511	-10.6926	-2.15589
208.3	-5.63215	-5.47986	-5.41066	-15.5911	-13.8959	-11.2231	-4.19486	-2.34958	-2.3047	-6.37772	-6.18997	-6.17527	-12.7815	-11.9423	-12.5886	-2.38645	-2.06945	-2.6087	-6.22415	-6.32577	-6.64712	-8.93681	-10.7635	-10.4947	-3.46269	-2.78919	-4.81348	-6.94629	-11.4772	-2.38928	-6.10495	-12.7072	-2.14325	-9.81565	-6.99125	-7.17959	-19.5726	-12.6178	-10.2367	-3.13508	-2.61651	-2.12109	-9.59766	-7.1198	-7.44829	-13.7991	-10.8616	-10.7839	-2.20435
208.2	-5.71897	-5.54789	-5.47557	-15.5836	-13.9508	-11.192	-4.25706	-2.36869	-2.27408	-6.42068	-6.25338	-6.27775	-12.7097	-11.9015	-12.5318	-2.46555	-2.07622	-2.65166	-6.3009	-6.43506	-6.78923	-8.82896	-10.6973	-10.3935	-3.54836	-2.78112	-4.79858	-7.05811	-11.526	-2.52161	-6.1974	-12.6517	-2.18846	-9.9136	-7.14194	-7.29701	-19.6182	-12.5148	-10.241	-3.13927	-2.58503	-2.15285	-9.82078	-7.24231	-7.5354	-13.6321	-10.8244	-10.784	-2.21774
208.1	-5.88382	-5.56811	-5.57093	-15.5316	-13.8215	-11.2975	-4.29614	-2.35869	-2.299	-6.46745	-6.32858	-6.40907	-12.6934	-11.8601	-12.4714	-2.50675	-2.05953	-2.64755	-6.41359	-6.51794	-6.84952	-8.76303	-10.6661	-10.3666	-3.61288	-2.80337	-4.78082	-7.1733	-11.5155	-2.50378	-6.20325	-12.6726	-2.22434	-10.0571	-7.24522	-7.42835	-19.5512	-12.517	-10.2485	-3.28214	-2.61784	-2.17902	-10.0608	-7.2365	-7.67824	-13.4112	-10.6688	-10.7622	-2.22644
208	-5.95799	-5.70349	-5.66344	-15.5455	-13.745	-11.2868	-4.3525	-2.45404	-2.3098	-6.55717	-6.36949	-6.51721	-12.6208	-11.8804	-12.4511	-2.51392	-2.10789	-2.57504	-6.51166	-6.59219	-6.91515	-8.66232	-10.6409	-10.3051	-3.76378	-2.8311	-4.8325	-7.26197	-11.4178	-2.5265	-6.20388	-12.624	-2.20319	-10.2129	-7.34929	-7.53872	-19.4685	-12.5112	-10.2467	-3.31716	-2.67865	-2.25796	-10.2177	-7.27508	-7.70616	-13.2717	-10.5277	-10.713	-2.33205
207.9	-6.03433	-5.78132	-5.74497	-15.5199	-13.6785	-11.2555	-4.43983	-2.48173	-2.3222	-6.66724	-6.49996	-6.6421	-12.6037	-11.8453	-12.382	-2.6275	-2.10116	-2.58701	-6.5303	-6.61087	-6.92976	-8.60209	-10.5515	-10.2277	-3.83574	-2.8364	-4.83973	-7.35975	-11.3809	-2.57457	-6.29889	-12.6229	-2.19012	-10.2921	-7.45525	-7.56159	-19.4002	-12.5173	-10.2178	-3.36793	-2.64961	-2.27351	-10.3824	-7.35334	-7.8582	-13.1205	-10.4113	-10.681	-2.3479
207.8	-6.10081	-5.75355	-5.78415	-15.4302	-13.6004	-11.1804	-4.49047	-2.47581	-2.31221	-6.75238	-6.63046	-6.70342	-12.5409	-11.7972	-12.3013	-2.68902	-2.08043	-2.56583	-6.61282	-6.68929	-6.991	-8.51452	-10.4016	-10.1365	-3.84843	-2.89796	-4.86398	-7.43399	-11.344	-2.63703	-6.41244	-12.6214	-2.28914	-10.4746	-7.60929	-7.57846	-19.3186	-12.5146	-10.2014	-3.41811	-2.71942	-2.2984	-10.4683	-7.3909	-7.8989	-13.0539	-10.1842	-10.6571	-2.35102
207.7	-6.1875	-5.7734	-5.88692	-15.4337	-13.5296	-11.1652	-4.46485	-2.45263	-2.27066	-6.79794	-6.70046	-6.74224	-12.5024	-11.7937	-12.3051	-2.77127	-2.06752	-2.59806	-6.70204	-6.82241	-7.05923	-8.43549	-10.2751	-10.0776	-3.88355	-2.94668	-4.87956	-7.51568	-11.3577	-2.68064	-6.51097	-12.5139	-2.22296	-10.671	-7.71979	-7.69154	-19.2674	-12.5022	-10.1254	-3.41489	-2.76092	-2.24392	-10.617	-7.46401	-7.87232	-12.7976	-10.195	-10.6879	-2.30563
207.6	-6.2022	-5.86901	-5.99332	-15.3947	-13.5111	-11.148	-4.51146	-2.43839	-2.27684	-6.91749	-6.82951	-6.78411	-12.5533	-11.7585	-12.2513	-2.80561	-2.05124	-2.59302	-6.7965	-6.91174	-7.10319	-8.38073	-10.2602	-10.0377	-4.02759	-2.99993	-4.96908	-7.61535	-11.233	-2.69098	-6.5595	-12.4447	-2.29817	-10.7856	-7.81234	-7.7339	-19.1886	-12.4686	-10.1343	-3.4505	-2.76569	-2.24395	-10.7563	-7.5457	-7.93627	-12.6687	-10.2034	-10.6375	-2.39758
207.5	-6.33085	-5.91053	-6.03877	-15.2521	-13.4133	-11.1707	-4.55769	-2.41174	-2.27629	-7.02746	-6.90716	-6.86585	-12.4032	-11.7782	-12.1389	-2.91555	-2.03808	-2.57964	-6.91623	-7.02085	-7.14479	-8.31643	-10.1604	-10.0341	-4.02199	-3.01386	-5.06289	-7.69838	-11.1765	-2.66647	-6.72097	-12.3551	-2.31227	-10.8676	-7.9231	-7.80302	-19.1585	-12.3867	-10.0979	-3.49745	-2.79465	-2.2957	-10.8946	-7.58647	-7.98388	-12.4216	-10.1469	-10.6099	-2.4503
207.4	-6.3918	-5.98287	-6.13857	-15.1095	-13.3305	-11.0757	-4.61009	-2.44068	-2.27619	-7.1279	-7.11415	-6.99367	-12.3188	-11.699	-12.0938	-2.85285	-2.13861	-2.58886	-7.05932	-7.07728	-7.26925	-8.14767	-9.94535	-9.90999	-4.10471	-2.94908	-5.13637	-7.85884	-11.0856	-2.62176	-6.92913	-12.2397	-2.39886	-11.0887	-7.99724	-7.95884	-19.0258	-12.3629	-9.99569	-3.57406	-2.78184	-2.32849	-11.119	-7.70162	-8.091	-12.171	-10.0825	-10.5024	-2.57223
207.3	-6.49786	-6.08179	-6.25206	-15.1162	-13.2651	-11.0386	-4.62854	-2.39008	-2.21495	-7.18655	-7.22293	-7.14303	-12.3686	-11.6501	-12.067	-2.8741	-2.15506	-2.68784	-7.11599	-7.21803	-7.40542	-8.05214	-9.8381	-9.70755	-4.18768	-2.97717	-5.16778	-7.95343	-11.0847	-2.58121	-7.08304	-12.2767	-2.45028	-11.2371	-8.07158	-7.99895	-18.9542	-12.2521	-10.0635	-3.70479	-2.7709	-2.28563	-11.306	-7.84664	-8.26195	-12.01	-9.97466	-10.4948	-2.55582
207.2	-6.50517	-6.17779	-6.32909	-14.9651	-13.2434	-10.9661	-4.71644	-2.39146	-2.20756	-7.21832	-7.29439	-7.21042	-12.21	-11.5324	-11.9008	-2.8855	-2.19475	-2.6822	-7.17943	-7.35626	-7.37043	-7.92832	-9.71441	-9.61806	-4.21182	-2.99472	-5.14872	-7.99762	-11.0029	-2.57527	-7.18335	-12.2364	-2.47575	-11.3789	-8.1928	-8.11906	-18.8152	-12.2126	-10.0269	-3.77086	-2.77487	-2.27625	-11.4931	-7.90314	-8.38993	-11.7339	-9.8118	-10.4427	-2.60107
207.1	-6.54428	-6.31585	-6.44748	-14.7834	-13.1752	-10.8784	-4.74684	-2.43207	-2.24503	-7.27106	-7.39891	-7.35928	-12.0744	-11.4145	-11.8248	-2.91787	-2.25737	-2.73943	-7.25499	-7.39678	-7.40804	-7.80572	-9.59414	-9.52081	-4.2695	-2.97939	-5.14368	-8.05344	-10.8243	-2.58903	-7.24893	-12.1489	-2.5139	-11.5735	-8.29361	-8.23503	-18.7729	-12.1389	-9.95616	-3.80653	-2.86645	-2.3086	-11.6263	-8.03377	-8.43819	-11.5164	-9.67036	-10.3252	-2.70108
207	-6.61775	-6.41175	-6.53389	-14.6648	-13.1598	-10.7952	-4.77713	-2.42712	-2.20462	-7.38103	-7.4675	-7.42495	-11.8795	-11.3383	-11.715	-2.96682	-2.27904	-2.76105	-7.41505	-7.52761	-7.37683	-7.61779	-9.52738	-9.42126	-4.29897	-2.98339	-5.17305	-8.14689	-10.7383	-2.62123	-7.37473	-12.0843	-2.58809	-11.7143	-8.2807	-8.34459	-18.5807	-12.0446	-9.90127	-3.87502	-2.92929	-2.25647	-11.7908	-8.15279	-8.48104	-11.3281	-9.4241	-10.2122	-2.7281
206.9	-6.69495	-6.46211	-6.70052	-14.524	-13.0682	-10.7346	-4.93158	-2.45893	-2.19741	-7.50517	-7.57367	-7.45033	-11.7748	-11.2376	-11.6848	-2.9895	-2.26739	-2.74015	-7.49898	-7.64485	-7.44838	-7.43478	-9.50789	-9.25109	-4.30016	-3.05211	-5.25172	-8.24654	-10.6784	-2.62627	-7.3596	-12.0409	-2.59539	-11.8752	-8.43874	-8.37984	-18.4891	-12.0225	-9.79835	-3.98709	-2.96907	-2.31019	-11.9287	-8.15958	-8.5657	-10.9592	-9.26884	-10.1461	-2.71276
206.8	-6.76753	-6.59876	-6.81048	-14.4194	-13.007	-10.6882	-5.01798	-2.51394	-2.28969	-7.70362	-7.62307	-7.54156	-11.681	-11.0748	-11.6746	-2.9667	-2.32689	-2.77794	-7.53706	-7.65364	-7.52045	-7.23268	-9.43819	-9.16085	-4.37568	-3.0535	-5.22605	-8.37307	-10.6062	-2.66288	-7.43032	-11.9003	-2.67004	-12.0644	-8.53117	-8.39356	-18.388	-11.9873	-9.7874	-4.09568	-3.01305	-2.38092	-12.1516	-8.24727	-8.7023	-10.6049	-9.09142	-10.0161	-2.78662
206.7	-6.90723	-6.67971	-6.80203	-14.2719	-12.9585	-10.6039	-5.07993	-2.53545	-2.25916	-7.78369	-7.79246	-7.62014	-11.5403	-11.0157	-11.5403	-2.97416	-2.40041	-2.80946	-7.5223	-7.76214	-7.57048	-7.13787	-9.24806	-9.02424	-4.4123	-3.01128	-5.3304	-8.4768	-10.481	-2.71906	-7.60286	-11.7854	-2.75457	-12.2097	-8.58351	-8.50654	-18.2514	-11.8879	-9.74128	-4.16655	-3.0464	-2.35405	-12.4195	-8.33803	-8.77506	-10.3711	-8.8215	-9.91296	-2.84013
206.6	-6.9714	-6.79912	-6.93047	-14.053	-12.9126	-10.5349	-5.14994	-2.5888	-2.27631	-7.80918	-7.93758	-7.7413	-11.3367	-10.9078	-11.353	-2.99006	-2.37375	-2.80005	-7.59851	-7.84814	-7.62556	-6.94136	-9.02023	-8.85484	-4.52305	-3.07445	-5.34213	-8.57139	-10.4426	-2.74098	-7.57777	-11.6799	-2.76335	-12.3547	-8.70628	-8.52912	-18.107	-11.7825	-9.704	-4.20107	-3.0659	-2.39642	-12.6023	-8.46658	-8.91417	-10.1238	-8.67156	-9.89678	-2.85028
206.5	-7.06745	-6.8722	-7.03381	-13.9608	-12.7355	-10.4632	-5.25188	-2.59268	-2.30012	-7.88692	-8.01665	-7.80067	-11.3224	-10.7555	-11.2811	-2.9941	-2.38532	-2.83675	-7.7526	-8.01212	-7.66382	-6.79184	-8.96309	-8.69268	-4.64761	-3.03479	-5.32052	-8.69428	-10.2657	-2.71053	-7.63353	-11.5813	-2.80919	-12.5148	-8.70242	-8.63427	-17.9946	-11.7736	-9.61071	-4.23788	-3.10765	-2.40812	-12.7804	-8.56974	-9.03028	-9.86288	-8.54065	-9.8301	-2.91189
206.4	-7.10563	-7.07748	-7.04159	-13.909	-12.61	-10.3968	-5.31903	-2.6198	-2.24423	-7.9625	-8.07216	-7.94104	-11.1611	-10.6624	-11.2438	-2.99503	-2.45581	-2.81453	-7.83521	-8.18931	-7.71952	-6.56143	-8.8282	-8.51953	-4.72436	-3.12246	-5.35289	-8.73415	-10.2356	-2.73451	-7.75348	-11.4965	-2.79385	-12.7386	-8.70025	-8.68711	-17.9019	-11.6625	-9.52861	-4.24482	-3.1035	-2.44231	-12.911	-8.60239	-9.15417	-9.53932	-8.47889	-9.5868	-2.93728
206.3	-7.23337	-7.22559	-7.10831	-13.8328	-12.5235	-10.254	-5.34599	-2.68338	-2.29767	-8.05833	-8.19673	-7.92906	-10.9629	-10.5191	-11.0906	-3.05362	-2.47842	-2.79843	-7.92631	-8.28304	-7.77524	-6.44081	-8.5938	-8.40298	-4.80979	-3.09659	-5.41739	-8.82862	-10.1171	-2.77235	-7.79257	-11.3794	-2.83996	-12.8227	-8.87002	-8.71408	-17.6728	-11.5314	-9.42967	-4.3495	-3.23973	-2.42895	-13.1036	-8.71789	-9.32521	-9.21521	-8.29476	-9.44608	-2.86666
206.2	-7.25542	-7.32691	-7.21687	-13.6982	-12.4128	-10.1295	-5.33029	-2.7604	-2.30586	-8.14661	-8.32358	-8.0876	-10.7848	-10.3375	-10.9854	-3.06283	-2.41492	-2.81727	-7.99736	-8.29985	-7.89392	-6.18016	-8.36899	-8.3023	-4.82422	-3.12323	-5.47573	-8.90883	-10.0665	-2.76506	-7.84252	-11.2693	-2.77761	-12.9329	-8.97448	-8.84142	-17.3878	-11.3875	-9.28084	-4.40752	-3.29311	-2.46048	-13.3358	-8.84045	-9.43814	-8.77533	-8.0917	-9.39425	-2.9522
206.1	-7.33099	-7.43349	-7.32082	-13.4468	-12.2501	-9.87397	-5.45692	-2.78258	-2.32379	-8.27214	-8.45035	-8.20218	-10.6263	-10.1123	-10.7424	-3.04999	-2.36856	-2.8406	-8.21376	-8.36861	-8.0016	-5.89603	-8.27107	-8.16732	-4.97027	-3.2382	-5.5988	-9.00857	-9.92907	-2.81279	-7.97322	-11.0884	-2.82619	-13.1564	-9.10382	-8.97059	-17.0883	-11.2579	-9.25818	-4.49492	-3.34283	-2.41301	-13.6247	-8.97363	-9.54913	-8.32715	-7.87283	-9.34157	-2.94056
206	-7.36084	-7.45641	-7.43653	-13.3726	-12.002	-9.69447	-5.54163	-2.80329	-2.38244	-8.35396	-8.57243	-8.31677	-10.5694	-10.0321	-10.5549	-3.12587	-2.45222	-2.9634	-8.28636	-8.37126	-8.05693	-5.76626	-8.1053	-7.99331	-4.99492	-3.26073	-5.60988	-9.10148	-9.82484	-2.89157	-8.14587	-11.009	-2.84958	-13.4086	-9.18491	-9.00509	-16.956	-11.1208	-9.09418	-4.61515	-3.37311	-2.53922	-13.8349	-9.04504	-9.57385	-7.92734	-7.65941	-9.337	-3.0181
205.9	-7.44792	-7.50691	-7.5993	-13.1507	-11.8463	-9.62384	-5.6059	-2.80889	-2.38325	-8.42873	-8.66482	-8.34268	-10.4068	-9.90283	-10.4805	-3.12737	-2.45502	-2.96485	-8.36815	-8.46131	-8.1579	-5.65822	-7.99637	-7.82917	-5.04469	-3.31965	-5.64145	-9.15705	-9.70685	-2.89026	-8.30618	-10.8314	-2.8432	-13.5991	-9.25751	-9.19223	-16.7333	-10.9727	-8.94932	-4.65284	-3.39596	-2.55183	-14.0772	-9.1962	-9.72631	-7.54449	-7.51333	-9.19378	-3.04707
205.8	-7.43109	-7.64514	-7.65645	-12.9278	-11.6911	-9.4684	-5.681	-2.79058	-2.43087	-8.49948	-8.69746	-8.46403	-10.2659	-9.81736	-10.3186	-3.09271	-2.45441	-3.01184	-8.42483	-8.59564	-8.20563	-5.48977	-7.87586	-7.74499	-4.98749	-3.32237	-5.69683	-9.29745	-9.59157	-2.84231	-8.42279	-10.7416	-2.82934	-13.6579	-9.42628	-9.26292	-16.4402	-10.7423	-8.8414	-4.68495	-3.42445	-2.61478	-14.2316	-9.26051	-9.81527	-7.23761	-7.28861	-9.03505	-3.11221
205.7	-7.53238	-7.72943	-7.7755	-12.692	-11.4673	-9.36145	-5.70429	-2.84163	-2.44678	-8.59974	-8.72675	-8.47408	-10.1443	-9.68885	-10.2666	-3.09853	-2.44249	-3.04045	-8.56172	-8.7141	-8.29112	-5.30542	-7.65743	-7.72598	-5.01151	-3.30187	-5.70324	-9.36495	-9.57942	-2.81773	-8.57049	-10.5884	-2.86913	-13.7682	-9.5602	-9.30919	-16.2863	-10.6022	-8.73987	-4.71259	-3.48098	-2.62163	-14.4066	-9.47489	-10.0388	-6.9025	-7.20419	-8.85518	-3.13886
205.6	-7.65103	-7.80384	-7.82359	-12.5336	-11.2952	-9.23946	-5.8379	-2.94125	-2.50961	-8.73887	-8.7854	-8.51764	-9.95713	-9.48402	-10.1938	-3.14012	-2.45653	-3.03775	-8.68388	-8.7966	-8.44677	-5.01587	-7.46436	-7.58206	-5.08072	-3.30501	-5.74263	-9.46335	-9.43928	-2.83078	-8.68307	-10.4389	-2.93769	-13.8906	-9.65205	-9.41248	-16.0531	-10.5064	-8.67087	-4.78593	-3.52182	-2.65816	-14.6878	-9.5628	-10.1717	-6.32974	-6.95083	-8.75188	-3.20765
205.5	-7.82067	-7.89993	-7.94764	-12.2653	-11.1203	-9.16762	-5.78581	-3.01274	-2.45956	-8.80869	-8.9207	-8.64694	-9.8366	-9.24016	-10.0607	-3.2328	-2.45921	-3.11836	-8.76458	-8.87989	-8.52921	-4.75617	-7.28404	-7.39862	-5.08994	-3.3242	-5.68752	-9.5719	-9.28525	-2.87709	-8.76827	-10.1776	-3.00934	-14.1951	-9.61069	-9.52336	-15.8271	-10.4384	-8.59112	-4.75727	-3.56949	-2.67273	-14.7695	-9.65072	-10.28	-5.84961	-6.6655	-8.63744	-3.24567
205.4	-7.90423	-7.89034	-7.95239	-12.1028	-10.9958	-9.10252	-5.81648	-2.97588	-2.52936	-8.93794	-9.01423	-8.72476	-9.72441	-9.10931	-9.87402	-3.20566	-2.47589	-3.08264	-8.81615	-8.96769	-8.64695	-4.68223	-7.1706	-7.19133	-5.20167	-3.33618	-5.77482	-9.68035	-9.20665	-2.83653	-8.79346	-10.0217	-3.06916	-14.4452	-9.70617	-9.67058	-15.6153	-10.3304	-8.39936	-4.77201	-3.63828	-2.66593	-14.9761	-9.71475	-10.4049	-5.51327	-6.34981	-8.48163	-3.24649
205.3	-7.96818	-7.97805	-8.04254	-11.9628	-10.8628	-8.92934	-5.86407	-2.93627	-2.5753	-9.03672	-9.2051	-8.80916	-9.60783	-8.9417	-9.72597	-3.18012	-2.51937	-3.18287	-8.89933	-9.16056	-8.72772	-4.43921	-6.96953	-6.98539	-5.24762	-3.37267	-5.80058	-9.88079	-9.09341	-2.85871	-8.90233	-9.86986	-3.04424	-14.8115	-9.83116	-9.7612	-15.3753	-10.1452	-8.29246	-4.88018	-3.67536	-2.68813	-15.1924	-9.71617	-10.4947	-5.06951	-6.19621	-8.37614	-3.33619
205.2	-8.05663	-8.0229	-8.07253	-11.7578	-10.6928	-8.85087	-5.91725	-3.00705	-2.62289	-9.11294	-9.29641	-8.83351	-9.3136	-8.79669	-9.54878	-3.18383	-2.57354	-3.20406	-8.92469	-9.26468	-8.84635	-4.16687	-6.73861	-6.82191	-5.2786	-3.38478	-5.77165	-9.88938	-8.99549	-2.92673	-9.03362	-9.7456	-3.04117	-15.0271	-9.99358	-9.91503	-15.1821	-10.0655	-8.17017	-4.92692	-3.72626	-2.73851	-15.3261	-9.86131	-10.5879	-4.74432	-5.98201	-8.2852	-3.34946
205.1	-8.0931	-8.24562	-8.17944	-11.5042	-10.4508	-8.64671	-6.00597	-3.04189	-2.64073	-9.14366	-9.39093	-8.96142	-9.10227	-8.67887	-9.42808	-3.20413	-2.63296	-3.2097	-9.00113	-9.34336	-8.89853	-3.97382	-6.55362	-6.62266	-5.32012	-3.38285	-5.83501	-10.0159	-8.91771	-2.92777	-9.12338	-9.5963	-2.99266	-15.2992	-10.1197	-10.0722	-14.89	-9.84092	-8.10393	-4.97698	-3.76258	-2.70382	-15.4428	-10.0223	-10.6626	-4.33909	-5.74823	-8.14346	-3.39187
205	-8.10165	-8.32395	-8.26482	-11.2477	-10.2808	-8.43224	-6.01066	-3.07135	-2.64533	-9.27892	-9.54131	-9.03773	-8.96058	-8.51398	-9.33953	-3.23162	-2.67059	-3.21145	-9.06965	-9.40145	-8.9457	-3.743	-6.34107	-6.42909	-5.38304	-3.40371	-5.88482	-10.0818	-8.69576	-2.92516	-9.14772	-9.44641	-2.98648	-15.4637	-10.2449	-10.2047	-14.5841	-9.66562	-7.95226	-5.03369	-3.77341	-2.70807	-15.648	-9.97912	-10.6431	-3.87178	-5.53802	-7.98335	-3.38668
204.9	-8.12027	-8.42456	-8.43144	-10.9061	-10.0867	-8.21041	-6.13777	-3.18271	-2.61883	-9.38727	-9.60759	-9.0609	-8.72714	-8.24929	-9.11947	-3.29232	-2.74608	-3.24331	-9.17849	-9.42664	-9.02887	-3.45256	-6.00193	-6.19198	-5.43256	-3.44741	-6.01746	-10.1654	-8.54431	-2.90965	-9.29922	-9.1747	-3.03087	-15.7327	-10.378	-10.3763	-14.372	-9.48678	-7.8579	-5.01686	-3.86835	-2.75045	-15.8413	-10.2021	-10.7955	-3.43678	-5.22788	-7.78517	-3.42979
204.8	-8.15405	-8.49339	-8.42066	-10.6187	-9.9277	-7.97531	-6.18447	-3.16756	-2.70733	-9.43361	-9.72578	-9.12093	-8.54175	-8.04541	-8.93939	-3.33823	-2.79604	-3.26566	-9.31129	-9.49944	-9.16359	-3.25258	-5.7806	-5.97251	-5.42288	-3.44573	-5.99755	-10.2966	-8.47692	-2.93917	-9.38959	-8.93014	-3.10728	-15.8818	-10.4619	-10.4464	-14.2667	-9.32306	-7.76313	-5.10102	-3.8442	-2.68737	-15.9815	-10.3421	-10.839	-2.91585	-5.14762	-7.58631	-3.42276
204.7	-8.20955	-8.52222	-8.45304	-10.2997	-9.78032	-7.80554	-6.25633	-3.19054	-2.74657	-9.47895	-9.78412	-9.13945	-8.33368	-7.85898	-8.71373	-3.2945	-2.80091	-3.27736	-9.44777	-9.62586	-9.27357	-2.99465	-5.5375	-5.80234	-5.4918	-3.45655	-6.06086	-10.3622	-8.34079	-2.95615	-9.47219	-8.70514	-3.12699	-16.1255	-10.5034	-10.5538	-13.9675	-9.13827	-7.73795	-5.16983	-3.93971	-2.69093	-16.1589	-10.4678	-10.9299	-2.54326	-5.0497	-7.46098	-3.40842
204.6	-8.26692	-8.64808	-8.55718	-10.1071	-9.54867	-7.68967	-6.35039	-3.20731	-2.79642	-9.53627	-9.82805	-9.27818	-8.18664	-7.68329	-8.59171	-3.31191	-2.854	-3.28214	-9.48285	-9.6647	-9.3546	-2.85087	-5.31266	-5.60684	-5.59182	-3.47441	-6.10844	-10.4773	-8.10355	-2.97768	-9.43812	-8.60721	-3.04572	-16.2819	-10.5485	-10.6911	-13.6565	-8.83761	-7.60012	-5.28473	-4.04125	-2.72062	-16.3339	-10.5779	-11.0857	-2.02907	-4.91555	-7.30544	-3.5102
204.5	-8.32264	-8.75726	-8.60433	-9.86448	-9.32619	-7.49585	-6.53228	-3.30621	-2.86635	-9.61994	-9.94605	-9.44444	-8.06185	-7.43791	-8.36985	-3.27442	-2.86087	-3.34996	-9.60349	-9.7049	-9.37581	-2.63196	-5.08813	-5.35367	-5.60133	-3.49405	-6.23248	-10.5555	-7.87285	-2.97469	-9.63896	-8.35867	-3.14971	-16.4137	-10.6985	-10.8148	-13.3946	-8.61935	-7.44907	-5.322	-3.99881	-2.74381	-16.4943	-10.6387	-11.2302	-1.52825	-4.56738	-7.12205	-3.65424
204.4	-8.45061	-8.84287	-8.64277	-9.59084	-9.03983	-7.34259	-6.51378	-3.36267	-2.89286	-9.70944	-10.0071	-9.5262	-7.8017	-7.20598	-8.15672	-3.39146	-2.90437	-3.44366	-9.68559	-9.82391	-9.47698	-2.41454	-4.8782	-5.14963	-5.56004	-3.51737	-6.29682	-10.6773	-7.71141	-2.99795	-9.81433	-8.15265	-3.16122	-16.559	-10.7395	-11.0353	-13.0455	-8.39179	-7.31998	-5.45442	-3.99499	-2.75791	-16.6439	-10.7214	-11.3648	-0.918987	-4.34475	-7.05741	-3.6334
204.3	-8.53471	-9.05903	-8.70677	-9.40476	-8.73317	-7.14947	-6.54281	-3.46607	-2.9824	-9.85048	-10.1143	-9.58643	-7.60165	-6.83557	-7.89564	-3.37158	-2.88028	-3.53785	-9.76772	-9.93839	-9.52197	-2.13295	-4.59913	-4.87828	-5.64696	-3.60176	-6.24606	-10.7436	-7.49463	-3.03164	-9.82539	-7.88391	-3.2048	-16.7672	-10.8734	-11.0615	-12.6181	-8.26461	-7.08966	-5.4411	-3.94604	-2.78175	-16.8254	-10.8335	-11.4891	-0.540345	-3.99781	-6.90012	-3.65633
204.2	-8.67297	-9.02296	-8.77577	-9.17431	-8.55257	-6.9965	-6.50377	-3.50069	-3.01501	-10.027	-10.1424	-9.67762	-7.28815	-6.65235	-7.59587	-3.45737	-2.87552	-3.60043	-9.82195	-9.95501	-9.59527	-1.93404	-4.4553	-4.79436	-5.67746	-3.58223	-6.30684	-10.7635	-7.32754	-3.1333	-9.82195	-7.72862	-3.19481	-16.9249	-11.0156	-11.1851	-12.3172	-8.00343	-6.92495	-5.52128	-3.96232	-2.79893	-16.9918	-10.8958	-11.5488	-0.128377	-3.75749	-6.71838	-3.65703
204.1	-8.7598	-9.02584	-8.80873	-8.89341	-8.3114	-6.72806	-6.54019	-3.55565	-3.07519	-10.0228	-10.1287	-9.70998	-7.03522	-6.39865	-7.42142	-3.47691	-2.84663	-3.58231	-9.9441	-10.0511	-9.59772	-1.74565	-4.13695	-4.70782	-5.69185	-3.68163	-6.35449	-10.7759	-7.14493	-3.13602	-9.89208	-7.47403	-3.20096	-17.0991	-11.1054	-11.2423	-11.9971	-7.78854	-6.79486	-5.55801	-3.99006	-2.88226	-17.1614	-10.8945	-11.682	0.2973	-3.50136	-6.56527	-3.7105
204	-8.84042	-8.98916	-8.8668	-8.67427	-8.0904	-6.5625	-6.63152	-3.6337	-3.15899	-10.2091	-10.2138	-9.79799	-6.89399	-6.30673	-7.22477	-3.50696	-2.86313	-3.66377	-9.99355	-10.1381	-9.72797	-1.55132	-3.86698	-4.37522	-5.72671	-3.70478	-6.4075	-10.8817	-6.93616	-3.16711	-10.028	-7.32795	-3.26014	-17.3519	-11.1698	-11.3479	-11.7148	-7.6564	-6.55677	-5.62035	-3.92728	-2.88303	-17.2995	-10.97	-11.7374	0.610947	-3.28697	-6.37819	-3.77353
203.9	-8.93313	-8.96111	-8.94342	-8.48022	-7.7679	-6.39129	-6.73454	-3.68353	-3.22533	-10.2547	-10.3006	-9.82424	-6.75257	-5.97299	-7.01721	-3.54245	-2.85345	-3.62826	-10.0571	-10.1811	-9.77187	-1.37432	-3.52355	-4.17822	-5.74574	-3.81873	-6.4401	-11.019	-6.75863	-3.17817	-10.057	-7.15565	-3.2789	-17.3943	-11.2638	-11.3728	-11.4075	-7.40964	-6.44571	-5.64625	-3.91351	-2.83971	-17.4386	-11.0552	-11.8332	1.08225	-3.11611	-6.21107	-3.73103
203.8	-8.95551	-9.04547	-9.01624	-8.2659	-7.47887	-6.22244	-6.82078	-3.7395	-3.24634	-10.244	-10.4059	-9.93962	-6.54385	-5.77536	-6.8075	-3.56029	-2.86481	-3.69112	-10.0491	-10.2142	-9.93764	-1.14501	-3.27322	-3.94921	-5.79825	-3.80805	-6.42029	-11.1464	-6.47244	-3.16539	-10.0734	-6.98483	-3.22008	-17.6554	-11.4134	-11.4714	-11.0915	-7.08725	-6.29396	-5.66599	-3.88286	-2.84264	-17.5967	-11.1155	-11.8828	1.48639	-2.89802	-6.03383	-3.70164
203.7	-9.04773	-9.04425	-9.02373	-7.94897	-7.17525	-6.13537	-6.76898	-3.79841	-3.29569	-10.3883	-10.4722	-10.0513	-6.3527	-5.55451	-6.54819	-3.6053	-2.86645	-3.71745	-10.1305	-10.3279	-9.99217	-0.925454	-2.87407	-3.76583	-5.85896	-3.8271	-6.37571	-11.1951	-6.32627	-3.17273	-10.1964	-6.75617	-3.2076	-17.8493	-11.485	-11.6336	-10.7401	-6.84255	-6.09853	-5.66004	-3.94457	-2.85223	-17.7916	-11.244	-11.9941	1.89397	-2.78007	-5.87109	-3.70474
203.6	-9.13197	-9.1186	-9.04998	-7.66344	-6.84537	-5.91852	-6.8203	-3.75143	-3.26039	-10.4252	-10.5843	-10.2263	-6.14553	-5.39551	-6.28299	-3.62244	-2.85756	-3.75393	-10.2211	-10.4165	-10.0861	-0.621898	-2.52635	-3.39408	-5.85312	-3.84858	-6.42056	-11.3067	-6.16992	-3.18816	-10.2838	-6.53232	-3.18877	-18.1057	-11.5308	-11.7349	-10.3934	-6.6142	-5.93523	-5.62611	-3.91336	-2.81173	-17.9143	-11.2913	-12.1064	2.3876	-2.50849	-5.68636	-3.68279
203.5	-9.23443	-9.13743	-9.14715	-7.43196	-6.56147	-5.75839	-6.84148	-3.7514	-3.29531	-10.5172	-10.612	-10.2574	-5.93622	-5.21726	-6.12817	-3.67779	-2.86242	-3.77099	-10.339	-10.4298	-10.1933	-0.445987	-2.28931	-3.20317	-5.85128	-3.91585	-6.46883	-11.4144	-6.0315	-3.20739	-10.2491	-6.30271	-3.13736	-18.1956	-11.6249	-11.791	-10.1213	-6.36174	-5.8111	-5.5978	-3.8878	-2.84095	-17.9004	-11.3361	-12.0792	2.87168	-2.37517	-5.51863	-3.69731
203.4	-9.28399	-9.1859	-9.16901	-7.18707	-6.26165	-5.60578	-6.91128	-3.7994	-3.22882	-10.622	-10.6286	-10.2558	-5.71332	-5.05301	-5.88206	-3.65951	-2.9306	-3.81947	-10.4391	-10.4899	-10.2402	-0.309421	-2.05789	-2.98124	-5.82946	-3.8805	-6.4847	-11.432	-5.73034	-3.19441	-10.3786	-6.07597	-3.15791	-18.3556	-11.6343	-11.8886	-9.73381	-6.12683	-5.62696	-5.65855	-3.92288	-2.78559	-17.9591	-11.4782	-12.0688	3.33684	-2.09915	-5.26936	-3.72299
203.3	-9.28058	-9.27166	-9.19753	-6.92131	-6.0368	-5.3712	-6.9393	-3.82683	-3.23338	-10.6989	-10.7617	-10.3319	-5.46966	-4.89009	-5.64574	-3.68006	-2.99507	-3.91085	-10.5235	-10.5548	-10.3455	-0.0423863	-1.72408	-2.7906	-5.76185	-3.92191	-6.57654	-11.461	-5.60115	-3.25736	-10.4491	-5.82226	-3.16735	-18.4755	-11.711	-12.031	-9.49028	-5.84475	-5.49488	-5.67934	-4.00793	-2.7503	-18.0012	-11.4714	-12.1421	3.80279	-1.84848	-5.10507	-3.73447
203.2	-9.39733	-9.26888	-9.28317	-6.67151	-5.88132	-5.21127	-6.96681	-3.81836	-3.23893	-10.7366	-10.8308	-10.405	-5.28947	-4.69422	-5.4443	-3.67931	-3.00262	-3.91051	-10.5679	-10.512	-10.3378	0.109641	-1.5037	-2.6087	-5.73563	-3.89011	-6.64159	-11.4901	-5.41541	-3.22041	-10.4934	-5.64388	-3.18394	-18.6266	-11.83	-12.12	-9.24041	-5.66556	-5.3627	-5.71983	-3.98415	-2.72966	-18.1106	-11.5889	-12.1599	4.10796	-1.65279	-4.99939	-3.74858
203.1	-9.47562	-9.28036	-9.39219	-6.23261	-5.44757	-4.91979	-7.0246	-3.76902	-3.24669	-10.8317	-10.8841	-10.5572	-5.044	-4.44118	-5.17916	-3.64422	-3.04046	-3.9637	-10.6121	-10.5805	-10.5104	0.321022	-1.21765	-2.24527	-5.73444	-3.89709	-6.67154	-11.5498	-5.0955	-3.17984	-10.5488	-5.3632	-3.2643	-18.7253	-11.9447	-12.2442	-8.88655	-5.38687	-5.225	-5.74123	-3.9386	-2.75031	-18.2914	-11.748	-12.1773	4.82256	-1.28223	-4.83712	-3.91294
203	-9.55705	-9.40458	-9.42898	-5.76146	-5.15723	-4.67952	-7.14594	-3.75178	-3.3143	-10.8945	-10.8882	-10.62	-4.67737	-4.09912	-4.93451	-3.67584	-3.15101	-4.03331	-10.7263	-10.7411	-10.5224	0.523977	-0.978164	-1.88848	-5.75385	-3.94455	-6.68898	-11.6662	-4.90732	-3.18917	-10.5297	-5.09084	-3.36799	-18.9064	-11.9959	-12.2335	-8.577	-4.97044	-5.13655	-5.82595	-3.86745	-2.75526	-18.4708	-11.7337	-12.2757	5.20752	-0.920703	-4.56133	-3.94551
202.9	-9.58541	-9.45199	-9.45731	-5.4469	-4.90508	-4.50664	-7.13196	-3.83393	-3.26432	-10.9624	-10.8675	-10.6784	-4.39376	-3.85193	-4.70885	-3.70569	-3.20561	-3.99997	-10.7081	-10.7848	-10.5652	0.760103	-0.645138	-1.60722	-5.7279	-3.93138	-6.67553	-11.6811	-4.75174	-3.19317	-10.5621	-4.90781	-3.36609	-19.014	-12.1419	-12.2443	-8.30184	-4.7387	-4.94301	-5.92618	-3.77613	-2.8119	-18.6391	-11.7991	-12.3113	5.59852	-0.690058	-4.29852	-3.95481
202.8	-9.67139	-9.51025	-9.45218	-5.03026	-4.7403	-4.34984	-7.10898	-3.8621	-3.25913	-11.0639	-10.9461	-10.7721	-4.19148	-3.55816	-4.41368	-3.70967	-3.2171	-3.98884	-10.8053	-10.8822	-10.5415	1.02241	-0.39485	-1.30853	-5.7897	-4.00305	-6.77066	-11.7253	-4.44071	-3.20398	-10.4919	-4.68451	-3.37186	-19.0345	-12.2315	-12.322	-7.99166	-4.47773	-4.85999	-5.92671	-3.78136	-2.79267	-18.8109	-11.8575	-12.3704	6.03228	-0.371308	-4.05005	-3.95934
202.7	-9.72305	-9.54803	-9.45969	-4.70894	-4.44492	-4.14618	-7.15754	-3.82028	-3.23933	-11.0817	-10.9983	-10.9007	-3.91698	-3.26977	-4.11504	-3.74164	-3.27707	-4.00344	-10.8356	-11.0487	-10.5434	1.30474	-0.076589	-1.04138	-5.84333	-3.98257	-6.74872	-11.6983	-4.25071	-3.26216	-10.4963	-4.4505	-3.35099	-19.189	-12.3675	-12.3613	-7.62082	-4.22394	-4.64219	-5.85791	-3.78249	-2.73997	-18.8657	-11.9756	-12.3689	6.42398	-0.0322803	-3.82329	-3.99949
202.6	-9.84506	-9.55863	-9.51798	-4.40977	-4.1578	-3.96261	-7.16344	-3.85416	-3.26393	-11.1963	-11.0137	-10.9309	-3.6091	-3.07344	-3.85498	-3.78027	-3.34492	-4.02921	-10.9075	-11.1289	-10.6861	1.6402	0.261318	-0.707728	-5.94078	-4.07594	-6.73539	-11.8143	-3.9319	-3.35229	-10.6581	-4.18359	-3.38505	-19.379	-12.4165	-12.4468	-7.39885	-4.02308	-4.47752	-5.97801	-3.75512	-2.72598	-19.0433	-12.0527	-12.444	7.01501	0.210262	-3.62303	-3.99341
202.5	-9.84147	-9.56871	-9.5509	-4.03257	-3.95307	-3.8019	-7.17661	-3.86554	-3.28797	-11.2314	-11.0857	-10.9691	-3.26625	-2.83137	-3.49723	-3.7235	-3.36434	-4.04978	-10.9264	-11.1804	-10.7829	1.869	0.536775	-0.348623	-5.9893	-4.10605	-6.76089	-11.8675	-3.76805	-3.36683	-10.6373	-3.95048	-3.42564	-19.6111	-12.5053	-12.5106	-6.9706	-3.79256	-4.26217	-5.9969	-3.73231	-2.7068	-19.2029	-12.0872	-12.4277	7.51831	0.510777	-3.44602	-3.94675
202.4	-9.88228	-9.60278	-9.56078	-3.67937	-3.69334	-3.60961	-7.19692	-3.81571	-3.2574	-11.3013	-11.1313	-11.0598	-2.91714	-2.61081	-3.1817	-3.71286	-3.45998	-4.07812	-10.9026	-11.2608	-10.8249	2.06303	0.852953	-0.0153953	-5.96537	-4.16194	-6.80022	-11.9545	-3.63406	-3.41116	-10.729	-3.73016	-3.43381	-19.7786	-12.5531	-12.5796	-6.64844	-3.54702	-4.07019	-5.97605	-3.64934	-2.75135	-19.3113	-12.1411	-12.3898	7.99703	0.724295	-3.27915	-3.95207
202.3	-9.85124	-9.62594	-9.616	-3.31413	-3.39982	-3.37034	-7.24515	-3.806	-3.26588	-11.3385	-11.1338	-11.1128	-2.59662	-2.2962	-2.9244	-3.62655	-3.54536	-4.1224	-10.9059	-11.266	-10.8197	2.26397	1.18533	0.26471	-5.98178	-4.25428	-6.81843	-12.0053	-3.42918	-3.39045	-10.7838	-3.5889	-3.44603	-19.8291	-12.642	-12.6405	-6.22343	-3.30241	-3.90821	-6.01909	-3.6936	-2.75181	-19.4112	-12.2292	-12.5762	8.43162	1.03923	-3.03921	-3.92599
202.2	-9.87725	-9.70052	-9.65868	-2.91913	-3.08882	-3.10558	-7.29127	-3.82546	-3.22051	-11.4047	-11.1994	-11.1535	-2.39495	-1.99311	-2.60957	-3.63202	-3.54057	-4.09476	-10.9811	-11.2792	-10.7579	2.61649	1.49147	0.540411	-5.99851	-4.18256	-6.86977	-11.9775	-3.20651	-3.42667	-10.8317	-3.33097	-3.34008	-19.9677	-12.696	-12.6253	-5.81082	-2.93485	-3.76699	-6.08314	-3.63126	-2.74943	-19.5858	-12.3066	-12.6611	9.01667	1.31609	-2.74534	-3.88745
202.1	-9.8848	-9.77008	-9.75404	-2.65637	-2.78877	-2.85698	-7.27256	-3.85058	-3.20661	-11.3798	-11.2354	-11.1652	-2.21847	-1.8521	-2.38183	-3.6996	-3.60452	-4.11218	-11.0606	-11.2402	-10.772	2.82051	1.68468	0.730502	-5.95475	-4.20305	-6.86115	-12.057	-2.99531	-3.3919	-10.8454	-3.23413	-3.36962	-19.9526	-12.7734	-12.5956	-5.55869	-2.71905	-3.64517	-6.08015	-3.62882	-2.74216	-19.6822	-12.3414	-12.6419	9.39302	1.49999	-2.60996	-3.86927
202	-9.87996	-9.73783	-9.7407	-2.23265	-2.60729	-2.62705	-7.27414	-3.97472	-3.18838	-11.3796	-11.2653	-11.1811	-1.87197	-1.53343	-2.03997	-3.6969	-3.55057	-4.06675	-11.1908	-11.2789	-10.8314	2.91926	2.00262	1.11172	-6.02417	-4.18251	-6.87036	-12.0869	-2.68365	-3.42564	-10.9392	-2.99551	-3.37671	-20.0627	-12.7916	-12.6455	-5.20529	-2.44225	-3.50376	-6.11129	-3.69813	-2.74032	-19.7664	-12.4981	-12.709	9.809	1.79822	-2.31498	-3.83533
201.9	-10.0146	-9.72957	-9.73125	-1.78807	-2.33696	-2.31254	-7.18847	-3.95471	-3.24731	-11.447	-11.2522	-11.2578	-1.57372	-1.2731	-1.74635	-3.6315	-3.55905	-4.13358	-11.2557	-11.2938	-10.8451	3.13708	2.24087	1.44145	-6.04208	-4.18924	-6.86299	-12.1879	-2.47676	-3.45165	-10.9502	-2.64233	-3.38402	-20.1336	-12.8046	-12.6704	-4.74085	-2.15365	-3.25346	-6.10616	-3.66247	-2.73838	-19.8871	-12.5062	-12.7241	10.2583	2.23829	-2.02089	-3.86619
201.8	-10.0571	-9.81469	-9.81195	-1.33482	-1.96658	-2.04577	-7.2934	-3.96259	-3.21635	-11.4963	-11.3136	-11.2931	-1.2837	-0.910158	-1.35123	-3.68077	-3.55748	-4.18387	-11.2654	-11.4019	-10.9919	3.51836	2.59584	1.90789	-6.07369	-4.21146	-6.84293	-12.2467	-2.10713	-3.48528	-11.0614	-2.30604	-3.37039	-20.2275	-12.7595	-12.5642	-4.14292	-1.74133	-2.93663	-6.11613	-3.64758	-2.79684	-20.1375	-12.6319	-12.8715	10.9261	2.61684	-1.68468	-3.87283
201.7	-10.1114	-9.81422	-9.71794	-1.08079	-1.65325	-1.80951	-7.30066	-3.98815	-3.18292	-11.5453	-11.346	-11.3819	-0.947868	-0.638423	-0.942314	-3.7065	-3.54847	-4.17463	-11.4054	-11.3014	-10.9517	3.79971	2.91459	2.25588	-6.11807	-4.20261	-6.8451	-12.2512	-1.82819	-3.46942	-11.0861	-2.08348	-3.40896	-20.3111	-12.6828	-12.5089	-3.75782	-1.52478	-2.64366	-6.16138	-3.62454	-2.74308	-20.1731	-12.6748	-12.9212	11.5065	2.75208	-1.47359	-3.88435
201.6	-10.1603	-9.83807	-9.73295	-0.726374	-1.42027	-1.54638	-7.2198	-3.97851	-3.14889	-11.6025	-11.4864	-11.3833	-0.728566	-0.49805	-0.59606	-3.67205	-3.524	-4.24477	-11.4796	-11.3851	-10.9983	4.11461	3.22782	2.43636	-6.14933	-4.20148	-6.79718	-12.3322	-1.42948	-3.49911	-11.1696	-1.79819	-3.41227	-20.3274	-12.6698	-12.4279	-3.30526	-1.19033	-2.44534	-6.18262	-3.52691	-2.72487	-20.2583	-12.6705	-12.9048	11.9936	3.10055	-1.32671	-3.90488
201.5	-10.2461	-9.86471	-9.82114	-0.419128	-0.984775	-1.28099	-7.276	-3.92235	-3.12942	-11.6203	-11.5764	-11.4173	-0.3665	-0.189293	-0.163336	-3.62987	-3.53148	-4.31686	-11.4775	-11.4569	-10.9781	4.36843	3.68673	2.97013	-6.1729	-4.20827	-6.87147	-12.2688	-1.23985	-3.46805	-11.2785	-1.42395	-3.39859	-20.4352	-12.9116	-12.5598	-2.75269	-0.868396	-2.15809	-6.15135	-3.6195	-2.67454	-20.3742	-12.7782	-13.007	12.5959	3.53797	-1.07452	-3.92002
201.4	-10.3537	-9.95957	-9.87464	-0.0631057	-0.624667	-1.0253	-7.29089	-3.93012	-3.12641	-11.6826	-11.6333	-11.3786	-0.107473	0.0809694	0.173608	-3.59643	-3.55133	-4.33467	-11.4609	-11.5667	-11.0614	4.65027	4.02853	3.28286	-6.11148	-4.23762	-6.83705	-12.332	-1.04481	-3.44423	-11.3634	-1.07174	-3.4452	-20.3917	-12.909	-12.5909	-2.34242	-0.633317	-1.8815	-6.093	-3.4897	-2.65794	-20.4589	-12.9129	-13.0556	13.0444	3.91253	-0.822105	-3.88701
201.3	-10.4045	-9.9777	-9.9145	0.335436	-0.384152	-0.741397	-7.28031	-3.91907	-3.10142	-11.7311	-11.5817	-11.429	0.254441	0.402881	0.531218	-3.6603	-3.55823	-4.34032	-11.4948	-11.6488	-11.0958	5.07168	4.31205	3.67141	-6.09244	-4.2363	-6.81198	-12.4272	-0.764389	-3.51731	-11.3596	-0.761979	-3.40923	-20.4774	-12.9989	-12.6395	-1.82217	-0.387061	-1.66609	-6.14191	-3.49274	-2.6514	-20.5649	-12.9806	-13.1275	13.4977	4.19975	-0.579331	-3.86435
201.2	-10.4939	-10.0374	-9.98126	0.668023	-0.0579942	-0.458147	-7.18758	-3.86398	-3.11146	-11.7265	-11.6018	-11.3719	0.670736	0.68848	0.824761	-3.65485	-3.60079	-4.3389	-11.6246	-11.6951	-11.1248	5.42494	4.60867	3.93085	-6.17655	-4.2494	-6.74859	-12.4364	-0.520346	-3.57657	-11.3398	-0.398983	-3.36961	-20.6036	-12.9987	-12.6499	-1.35103	-0.0994578	-1.41164	-6.18417	-3.57119	-2.66937	-20.7253	-13.0397	-13.2085	13.9915	4.62371	-0.297577	-3.88052
201.1	-10.5361	-10.0518	-10.0342	1.31818	0.389792	-0.119701	-7.26665	-3.81878	-3.04556	-11.784	-11.6054	-11.5258	0.96752	1.06233	1.27876	-3.65489	-3.65279	-4.29899	-11.5371	-11.7079	-11.1987	5.83984	5.14624	4.40267	-6.30848	-4.15687	-6.72338	-12.3993	-0.184802	-3.58029	-11.3352	0.0223869	-3.30093	-20.8123	-12.9351	-12.603	-0.810001	0.337209	-1.26979	-6.19765	-3.61431	-2.64105	-20.8681	-13.1635	-13.1889	14.478	4.89098	0.0511868	-3.77714
201	-10.5014	-10.0894	-10.0759	1.80378	0.786842	0.184987	-7.25448	-3.77507	-3.10175	-11.8032	-11.6037	-11.5214	1.36283	1.31246	1.62849	-3.67367	-3.75262	-4.28993	-11.5152	-11.7368	-11.2562	6.16819	5.40741	4.71994	-6.23542	-4.21525	-6.72569	-12.328	0.103649	-3.65103	-11.362	0.337353	-3.30275	-20.9366	-12.9254	-12.7377	-0.260083	0.753756	-0.951999	-6.24613	-3.68241	-2.62541	-20.895	-13.2342	-13.201	14.9904	5.26471	0.336554	-3.82052
200.9	-10.4855	-10.2399	-10.1098	2.25017	1.17305	0.42636	-7.36779	-3.69145	-3.09229	-11.8304	-11.6864	-11.4772	1.66171	1.67676	1.91855	-3.69342	-3.77314	-4.31152	-11.5327	-11.7356	-11.2643	6.61371	5.76444	5.06032	-6.16104	-4.22352	-6.73882	-12.2865	0.391947	-3.65983	-11.3532	0.679998	-3.33298	-20.9968	-12.9342	-12.7033	0.223671	1.024	-0.706209	-6.20908	-3.72295	-2.54963	-21.0041	-13.2991	-13.1167	15.5398	5.50425	0.658936	-3.83326
200.8	-10.4967	-10.3133	-10.21	2.63	1.48833	0.694421	-7.24852	-3.71899	-3.05366	-11.8188	-11.7442	-11.4891	2.03389	2.02297	2.17866	-3.62631	-3.82805	-4.28486	-11.6217	-11.7288	-11.3524	7.00342	6.053	5.40973	-6.23982	-4.1994	-6.68501	-12.3592	0.658679	-3.68761	-11.4076	1.05848	-3.34834	-21.0877	-12.9137	-12.7119	0.640361	1.33168	-0.569694	-6.18964	-3.70339	-2.49192	-21.0964	-13.4002	-13.1026	16.0597	5.87965	0.890365	-3.71353
200.7	-10.4265	-10.3891	-10.158	3.05149	2.02029	0.962828	-7.12718	-3.68604	-3.03124	-11.7961	-11.7312	-11.4939	2.43902	2.41908	2.54037	-3.66143	-3.81677	-4.28169	-11.7533	-11.7636	-11.3759	7.41547	6.5335	6.0113	-6.24895	-4.16946	-6.67326	-12.3494	1.09434	-3.6468	-11.4088	1.4111	-3.33482	-21.2155	-12.9967	-12.7422	1.26194	1.78786	-0.345428	-6.25798	-3.73908	-2.48734	-21.2573	-13.4859	-13.1284	16.7844	6.21016	1.08889	-3.73717
200.6	-10.4076	-10.2882	-10.1952	3.53492	2.32479	1.27141	-7.07747	-3.65881	-3.10429	-11.8274	-11.6936	-11.4461	2.67063	2.7241	2.96908	-3.6132	-3.89728	-4.34381	-11.7493	-11.7834	-11.3424	7.74268	6.83177	6.35242	-6.2079	-4.07342	-6.71046	-12.2316	1.35993	-3.6989	-11.4179	1.75871	-3.34875	-21.2587	-12.9909	-12.7297	1.80087	1.95039	-0.0847555	-6.25603	-3.69855	-2.53976	-21.4933	-13.4868	-13.2007	17.4392	6.46301	1.31874	-3.79135
200.5	-10.4375	-10.3349	-10.2602	3.94846	2.68785	1.54551	-7.0219	-3.59895	-3.10557	-11.9018	-11.5928	-11.5136	2.99916	3.08263	3.31667	-3.67259	-3.96089	-4.35271	-11.7028	-11.7948	-11.3953	8.15288	7.06725	6.6959	-6.16444	-4.03239	-6.77907	-12.2907	1.6606	-3.68306	-11.3703	2.14315	-3.38128	-21.4374	-13.0046	-12.7336	2.28806	2.28429	0.0580017	-6.22949	-3.62069	-2.51394	-21.4941	-13.4369	-13.1681	18.0309	6.76026	1.58797	-3.88028
200.4	-10.394	-10.2988	-10.3317	4.3519	3.02882	1.84171	-7.01517	-3.55007	-3.06166	-11.8572	-11.6315	-11.4555	3.33658	3.38764	3.74537	-3.65994	-3.98911	-4.37937	-11.7752	-11.8341	-11.411	8.51722	7.46416	6.96093	-6.14733	-4.05238	-6.80491	-12.2016	2.00247	-3.67404	-11.3691	2.36606	-3.41258	-21.4636	-13.046	-12.7879	2.77869	2.64763	0.301255	-6.1842	-3.60092	-2.55818	-21.6868	-13.5812	-13.0853	18.5924	7.08096	1.82529	-3.91147
200.3	-10.429	-10.3127	-10.2889	4.77971	3.3964	2.21311	-7.05141	-3.59361	-3.02597	-11.8089	-11.6077	-11.4932	3.72199	3.778	4.19794	-3.62788	-3.97814	-4.35653	-11.7576	-11.8562	-11.3849	8.78461	7.83803	7.29432	-6.14835	-4.02416	-6.78156	-12.1566	2.42187	-3.59533	-11.4226	2.66897	-3.45895	-21.5592	-13.0568	-12.8264	3.33258	2.99129	0.541338	-6.26879	-3.60218	-2.55707	-21.7465	-13.6005	-13.2141	19.0759	7.50218	2.06333	-3.92549
200.2	-10.3756	-10.3625	-10.32	5.28302	3.79873	2.59673	-7.14371	-3.50435	-3.00762	-11.7649	-11.569	-11.4762	4.06548	4.26623	4.61857	-3.71153	-3.9482	-4.30149	-11.7878	-11.9482	-11.4188	9.28753	8.32565	7.76093	-6.08925	-4.08138	-6.7781	-12.1041	2.7155	-3.56965	-11.3891	3.11679	-3.4858	-21.6256	-13.1471	-12.8501	3.94161	3.41258	0.899826	-6.22873	-3.63155	-2.58108	-21.9456	-13.6083	-13.3637	19.6825	7.87147	2.4138	-3.93648
200.1	-10.4875	-10.3717	-10.3781	5.66573	4.13692	2.93601	-7.16057	-3.56971	-3.01222	-11.7106	-11.5717	-11.4082	4.32271	4.67636	4.92957	-3.70597	-3.89994	-4.28413	-11.7587	-11.8459	-11.4087	9.60374	8.72354	8.13289	-6.13246	-4.10922	-6.71779	-12.1125	3.03782	-3.55177	-11.3716	3.47424	-3.4365	-21.6759	-13.173	-12.788	4.46527	3.75624	1.17463	-6.24761	-3.55831	-2.51032	-22.1021	-13.5987	-13.3827	20.2611	8.13438	2.70408	-3.91958
200	-10.4664	-10.4112	-10.3548	6.27688	4.65998	3.23616	-7.19592	-3.59276	-3.09257	-11.6929	-11.5154	-11.3173	4.81489	5.14586	5.43941	-3.7674	-3.90146	-4.28513	-11.7548	-11.9312	-11.415	10.0643	9.11882	8.60466	-6.15613	-4.04326	-6.73215	-12.2173	3.4569	-3.55009	-11.3881	3.79664	-3.37474	-21.5863	-13.102	-12.7361	5.10492	4.12262	1.47575	-6.23027	-3.53238	-2.55319	-22.2268	-13.5745	-13.3563	20.9536	8.57841	3.13316	-3.9536
199.9	-10.4667	-10.3774	-10.313	6.59253	4.99262	3.59159	-7.22358	-3.66299	-3.09884	-11.6789	-11.5193	-11.2466	5.19559	5.65972	5.7758	-3.72834	-3.88672	-4.20549	-11.7974	-11.8912	-11.3706	10.5142	9.61199	8.93177	-6.1758	-3.98817	-6.71175	-12.2235	3.7665	-3.54768	-11.3502	4.15803	-3.38848	-21.6059	-13.0444	-12.7779	5.67378	4.47521	1.75519	-6.24565	-3.52201	-2.57428	-22.3332	-13.4569	-13.3061	21.4619	8.9712	3.4399	-3.92385
199.8	-10.4245	-10.3931	-10.3412	7.02583	5.58227	3.97038	-7.13513	-3.63699	-3.11946	-11.6206	-11.5158	-11.2405	5.6893	6.05752	6.39403	-3.72034	-3.82981	-4.23658	-11.6511	-11.9803	-11.4814	11.0367	10.1046	9.32874	-6.21107	-3.929	-6.71946	-12.1351	4.21155	-3.56865	-11.3361	4.62871	-3.37296	-21.8262	-12.9688	-12.808	6.34006	4.78132	2.0231	-6.21262	-3.55281	-2.53809	-22.3179	-13.4607	-13.2942	22.1667	9.41941	3.80869	-3.91005
199.7	-10.4988	-10.3766	-10.2941	7.46463	5.99009	4.25628	-7.12589	-3.58186	-3.06938	-11.6886	-11.5021	-11.1719	6.06684	6.28939	6.82515	-3.69563	-3.83249	-4.20884	-11.6524	-11.9436	-11.4048	11.4169	10.5112	9.7238	-6.22371	-3.83857	-6.65718	-12.2003	4.46089	-3.52116	-11.3226	5.0131	-3.37988	-21.8092	-13.0026	-12.7933	6.87755	5.08664	2.22557	-6.13954	-3.60207	-2.51973	-22.2935	-13.424	-13.289	22.7665	9.7074	4.07493	-3.92839
199.6	-10.4817	-10.3838	-10.3404	7.83126	6.45963	4.54896	-7.19122	-3.54884	-3.03346	-11.6531	-11.5307	-11.1804	6.48233	6.61462	7.08365	-3.66014	-3.76513	-4.14124	-11.6702	-11.9999	-11.4337	11.746	10.9595	10.0638	-6.18714	-3.79663	-6.59322	-12.1891	4.76143	-3.48029	-11.3541	5.37559	-3.42661	-21.8352	-12.9166	-12.7305	7.44983	5.36466	2.52159	-6.14836	-3.58184	-2.53941	-22.369	-13.3992	-13.2779	23.3028	10.0315	4.35471	-3.85678
199.5	-10.4913	-10.3618	-10.3688	8.30001	6.76602	4.84607	-7.10465	-3.58328	-3.00346	-11.6854	-11.5242	-11.1157	6.82165	6.99693	7.51333	-3.68809	-3.72197	-4.13013	-11.6289	-11.8499	-11.4573	12.0847	11.3599	10.5665	-6.08706	-3.8147	-6.54556	-12.2347	5.06072	-3.44727	-11.2915	5.71561	-3.4413	-21.8403	-12.8571	-12.7102	7.97415	5.64354	2.72576	-6.16713	-3.57875	-2.64037	-22.3798	-13.4	-13.3853	23.8001	10.4051	4.62534	-3.84068
199.4	-10.4788	-10.3602	-10.4277	8.74941	7.25003	5.24514	-7.09716	-3.52219	-3.02917	-11.6754	-11.5012	-11.1552	7.21409	7.40548	7.87443	-3.72341	-3.67601	-4.1197	-11.5699	-11.7239	-11.3568	12.5405	11.8495	10.987	-6.08563	-3.7935	-6.52428	-12.0523	5.42996	-3.40692	-11.1664	6.20085	-3.49204	-21.7773	-12.8028	-12.6062	8.62738	6.1343	3.05623	-6.06165	-3.50822	-2.57762	-22.3314	-13.3244	-13.2741	24.337	10.836	5.02867	-3.76447
199.3	-10.4079	-10.308	-10.3969	9.09537	7.65172	5.55485	-7.09725	-3.53032	-2.9753	-11.6134	-11.4088	-11.0929	7.53445	7.68494	8.23933	-3.7436	-3.65754	-4.12986	-11.6129	-11.6904	-11.318	12.8687	12.2723	11.2382	-6.06135	-3.71934	-6.449	-11.9348	5.69244	-3.44844	-11.0814	6.52319	-3.39777	-21.641	-12.6809	-12.6856	9.17694	6.52015	3.22053	-6.06173	-3.55238	-2.54912	-22.4105	-13.2491	-13.2582	24.6732	11.1801	5.36485	-3.75852
199.2	-10.5164	-10.2991	-10.4806	9.52389	8.01888	5.93337	-7.06809	-3.45359	-3.02188	-11.5606	-11.3183	-10.9453	7.87291	8.06347	8.57785	-3.69912	-3.60315	-4.09406	-11.6367	-11.5993	-11.2776	13.213	12.6042	11.5824	-6.05728	-3.67076	-6.30184	-11.8831	6.10458	-3.41231	-11.0524	6.87132	-3.40839	-21.4891	-12.7115	-12.6559	9.7861	6.90463	3.4388	-6.00641	-3.50847	-2.51361	-22.4689	-13.2455	-13.2196	25.0704	11.5326	5.74972	-3.73609
199.1	-10.5111	-10.2424	-10.4641	9.92138	8.42799	6.26142	-6.98039	-3.46579	-3.05884	-11.4142	-11.3148	-10.9024	8.14707	8.32807	8.9073	-3.70155	-3.55762	-4.04046	-11.5458	-11.5525	-11.2869	13.5088	13.1285	12.056	-5.97113	-3.68181	-6.22718	-11.9386	6.5078	-3.46125	-10.9794	7.24929	-3.37924	-21.6268	-12.6702	-12.6983	10.2129	7.24886	3.66161	-5.94084	-3.42365	-2.46141	-22.4687	-13.1664	-13.1222	25.5689	11.9323	5.95224	-3.75141
199	-10.4747	-10.1482	-10.3324	10.5288	8.86193	6.69412	-6.96156	-3.45173	-3.05436	-11.4599	-11.2424	-10.8913	8.68244	8.81827	9.41251	-3.62142	-3.53203	-3.99819	-11.4947	-11.4428	-11.293	13.7983	13.6067	12.5699	-5.86017	-3.66902	-6.12577	-11.9284	6.94796	-3.3898	-10.9478	7.76148	-3.43528	-21.6567	-12.6789	-12.6483	10.8397	7.59311	3.96516	-5.88566	-3.34189	-2.43525	-22.465	-13.1247	-13.0803	26.0172	12.1832	6.32077	-3.71975
198.9	-10.3402	-10.1564	-10.3352	10.9564	9.2654	6.98875	-6.92452	-3.35688	-3.05399	-11.4071	-11.2095	-10.8865	9.02854	9.2205	9.70635	-3.62419	-3.52935	-3.9833	-11.3817	-11.3112	-11.2381	14.1728	13.9277	12.9501	-5.81677	-3.58655	-6.0634	-11.8679	7.22075	-3.33528	-10.9631	8.11898	-3.40262	-21.6582	-12.576	-12.5791	11.3762	7.91897	4.26205	-5.85087	-3.25232	-2.40377	-22.5071	-13.1265	-13.0569	26.5448	12.5613	6.57601	-3.74753
198.8	-10.1436	-10.1545	-10.3309	11.3332	9.63362	7.23719	-6.92064	-3.32445	-3.02981	-11.217	-11.241	-10.7754	9.2999	9.61103	10.1613	-3.63427	-3.49829	-3.91146	-11.3641	-11.287	-11.2177	14.4925	14.3818	13.2387	-5.74035	-3.57764	-6.00265	-11.8388	7.58564	-3.29705	-10.8878	8.53194	-3.39123	-21.7797	-12.4313	-12.5864	11.8079	8.1931	4.39781	-5.8181	-3.19404	-2.37175	-22.5697	-12.979	-13.1234	26.8743	12.8393	6.85998	-3.73541
198.7	-10.0466	-10.0281	-10.2662	11.7977	10.1075	7.5621	-6.82941	-3.35215	-3.07704	-11.1488	-11.2131	-10.7588	9.77448	10.0357	10.6887	-3.58196	-3.47959	-3.8581	-11.2898	-11.1806	-11.106	15.0455	15.0028	13.6619	-5.73377	-3.56718	-6.01479	-11.7547	8.04906	-3.24359	-10.7153	9.04782	-3.42918	-21.758	-12.416	-12.5271	12.3834	8.50235	4.70177	-5.81597	-3.21336	-2.32814	-22.4646	-12.9193	-13.0468	27.4846	13.1819	7.18809	-3.66653
198.6	-10.1074	-10.0756	-10.3665	12.2635	10.4554	7.88295	-6.72534	-3.23515	-3.10421	-11.0446	-11.1055	-10.716	10.1391	10.4636	10.981	-3.50739	-3.45014	-3.84243	-11.0793	-11.2401	-11.069	15.3317	15.3706	13.9843	-5.67331	-3.54084	-5.91942	-11.7074	8.28531	-3.19139	-10.6866	9.43673	-3.42975	-21.7596	-12.2631	-12.582	12.9122	8.89214	4.83536	-5.75911	-3.18137	-2.26348	-22.5298	-12.8862	-12.879	27.7783	13.5262	7.39066	-3.52493
198.5	-10.0844	-10.0231	-10.3055	12.8256	11.0317	8.33405	-6.72056	-3.30873	-3.03674	-10.9087	-10.9853	-10.6541	10.6017	11.0884	11.3312	-3.5114	-3.44865	-3.79517	-10.7902	-11.0604	-10.9895	15.7731	15.8283	14.4986	-5.67249	-3.52415	-5.92623	-11.5295	8.50875	-3.16893	-10.6693	9.87055	-3.40252	-21.7803	-12.2126	-12.6238	13.5274	9.26386	5.22087	-5.75803	-3.14789	-2.24861	-22.5	-12.8226	-12.7706	28.4174	13.9024	7.77002	-3.45754
198.4	-10.0148	-9.93926	-10.2611	13.3834	11.4079	8.63446	-6.57883	-3.24564	-3.01937	-10.8373	-10.8422	-10.5932	10.9148	11.4369	11.6853	-3.52049	-3.49322	-3.7499	-10.7902	-10.9684	-10.96	16.2163	16.2267	14.8909	-5.54734	-3.4972	-5.8433	-11.5075	8.97549	-3.1674	-10.5637	10.3414	-3.38758	-21.6842	-12.103	-12.5407	14.152	9.63809	5.54618	-5.77046	-3.04331	-2.24451	-22.4144	-12.6179	-12.5757	28.7915	14.1983	8.05989	-3.4897
198.3	-9.90348	-9.82487	-10.2028	13.9202	11.8397	9.03397	-6.52806	-3.23856	-2.91499	-10.7118	-10.8314	-10.6243	11.4212	11.8759	12.1247	-3.59476	-3.39263	-3.71685	-10.7891	-10.8567	-10.9054	16.5919	16.6865	15.3219	-5.52279	-3.42001	-5.78274	-11.4574	9.47336	-3.12349	-10.5695	10.7313	-3.42919	-21.6757	-11.9307	-12.5146	14.6924	10.1339	5.72739	-5.73566	-2.99672	-2.2382	-22.3377	-12.3592	-12.4738	29.4305	14.5938	8.36339	-3.46683
198.2	-9.81346	-9.73876	-10.0675	14.4909	12.3634	9.5305	-6.53943	-3.28178	-2.88172	-10.5543	-10.8598	-10.4375	11.8281	12.2709	12.5834	-3.53405	-3.37999	-3.66262	-10.652	-10.6873	-10.6752	16.8802	17.2256	15.8005	-5.46206	-3.42795	-5.70297	-11.3658	9.86757	-3.02842	-10.5467	11.1843	-3.3574	-21.7059	-11.8261	-12.3277	15.1674	10.6248	6.0713	-5.59601	-2.91299	-2.17677	-22.3022	-12.2962	-12.3522	29.9742	15.0104	8.73663	-3.42585
198.1	-9.72811	-9.66728	-9.99706	14.9099	12.7274	9.86241	-6.51216	-3.25909	-2.87717	-10.4162	-10.7768	-10.3043	12.203	12.5873	12.9489	-3.51693	-3.39901	-3.6177	-10.4883	-10.6057	-10.5012	17.2011	17.7068	16.0933	-5.36523	-3.32228	-5.5993	-11.3312	10.1933	-3.01153	-10.4744	11.4552	-3.37574	-21.8433	-11.7463	-12.2259	15.6939	10.9685	6.30437	-5.48393	-2.79767	-2.17765	-22.161	-12.2017	-12.2874	30.3477	15.3334	9.09806	-3.45122
198	-9.67343	-9.55043	-9.85487	15.294	13.181	10.249	-6.47516	-3.18601	-2.82984	-10.2219	-10.697	-10.2563	12.6627	13.0062	13.3391	-3.53139	-3.25878	-3.5983	-10.3849	-10.4021	-10.4275	17.6376	18.2875	16.6038	-5.21177	-3.31079	-5.65222	-11.3268	10.6124	-2.9483	-10.318	11.9093	-3.35964	-21.8712	-11.7724	-12.2605	16.1413	11.3955	6.63458	-5.42523	-2.69451	-2.2301	-22.0902	-11.9392	-12.3583	30.883	15.7333	9.44065	-3.38362
197.9	-9.57999	-9.47174	-9.77953	15.6615	13.5325	10.454	-6.46949	-3.15551	-2.81971	-10.098	-10.5856	-10.2006	13.0203	13.305	13.6908	-3.45336	-3.1865	-3.52426	-10.3499	-10.355	-10.3323	17.8864	18.7133	17.0303	-5.10184	-3.21985	-5.55681	-11.296	10.8378	-2.891	-10.2569	12.2556	-3.31107	-21.8963	-11.6713	-11.9987	16.5599	11.5867	6.84565	-5.37596	-2.64413	-2.14461	-22.0418	-11.7766	-12.3391	31.2482	16.0652	9.64908	-3.37976
197.8	-9.47001	-9.37757	-9.64662	16.1994	13.9933	10.8665	-6.39357	-3.116	-2.89016	-10.0797	-10.5126	-10.112	13.4371	13.7147	14.1872	-3.39631	-3.13908	-3.44936	-10.16	-10.2739	-10.2386	18.2294	19.1713	17.5879	-4.98204	-3.10424	-5.45811	-11.2113	11.139	-2.77443	-10.2029	12.6091	-3.27475	-21.9343	-11.6809	-12.0593	17.0864	11.9779	7.1623	-5.35859	-2.6204	-2.13648	-21.9968	-11.6913	-12.3342	31.8162	16.4824	10.0404	-3.32799
197.7	-9.46307	-9.25133	-9.56246	16.6523	14.2097	11.2045	-6.40543	-3.08433	-2.88544	-10.0067	-10.3887	-10.1097	13.7972	14.0038	14.6337	-3.35553	-3.15772	-3.42791	-10.0017	-10.2277	-10.1349	18.5924	19.4923	17.8771	-4.87839	-3.03969	-5.43795	-11.1075	11.4318	-2.72498	-10.0882	13.0867	-3.33417	-21.8209	-11.5751	-11.925	17.6568	12.18	7.47675	-5.25755	-2.62683	-2.0893	-21.8953	-11.6283	-12.2686	32.1357	16.7608	10.325	-3.21425
197.6	-9.26941	-9.15192	-9.3917	17.1064	14.5553	11.4797	-6.35015	-3.03846	-2.81977	-9.90749	-10.3913	-10.0841	14.1447	14.1831	14.9109	-3.25634	-3.07971	-3.36508	-9.90149	-10.0964	-10.0653	18.8678	19.7872	18.1456	-4.71041	-3.1222	-5.37104	-11.1383	11.5146	-2.68658	-10.0679	13.5486	-3.28931	-21.8394	-11.3516	-11.8672	18.0896	12.4207	7.74925	-5.23864	-2.58828	-2.02158	-21.9052	-11.5155	-12.2496	32.3812	17.0853	10.6656	-3.14723
197.5	-9.23386	-9.09287	-9.26674	17.4042	14.8856	11.7059	-6.35408	-3.09652	-2.83479	-9.7384	-10.2682	-9.94853	14.5515	14.5339	15.2937	-3.25206	-3.09069	-3.24894	-9.79329	-10.0741	-9.96532	19.0851	20.2779	18.5192	-4.68531	-3.18284	-5.25486	-11.0141	11.7584	-2.64183	-9.98317	13.8718	-3.26603	-21.6229	-11.2319	-11.7666	18.5757	12.7663	7.96659	-5.23911	-2.55922	-1.93582	-21.6741	-11.3895	-12.2147	32.6713	17.3552	10.908	-3.09284
197.4	-9.15185	-9.02984	-9.05681	17.9201	15.3438	12.1563	-6.30862	-3.10759	-2.8167	-9.57469	-10.2078	-9.81081	15.0108	14.9244	15.591	-3.18212	-3.00098	-3.16612	-9.73307	-9.8422	-9.7956	19.3401	20.7364	18.8788	-4.65011	-3.08606	-5.21898	-10.9993	12.0666	-2.54807	-10.0072	14.186	-3.21792	-21.4036	-11.065	-11.5399	19.179	13.1355	8.20912	-5.30418	-2.49848	-1.87034	-21.531	-11.1677	-12.0608	32.9146	17.7187	11.1804	-3.04964
197.3	-9.02936	-8.91633	-8.98329	18.4126	15.7391	12.3748	-6.14657	-3.09548	-2.79415	-9.47128	-10.0969	-9.62965	15.3601	15.1931	15.7884	-3.10085	-3.04876	-3.08597	-9.63011	-9.76323	-9.68225	19.5527	21.0519	19.3188	-4.66267	-3.13206	-5.23201	-10.8229	12.2522	-2.57336	-9.83908	14.5416	-3.16935	-21.3532	-11.0644	-11.5334	19.609	13.3985	8.42971	-5.29599	-2.48138	-1.76197	-21.5347	-11.1267	-11.9937	33.0941	17.933	11.4244	-3.02869
197.2	-8.88752	-8.83783	-8.78197	18.8186	16.1528	12.682	-6.1181	-3.06618	-2.81911	-9.37237	-10.0325	-9.43738	15.7613	15.5724	16.2805	-3.08844	-3.02569	-3.09831	-9.44355	-9.5815	-9.47921	19.9622	21.3324	19.6315	-4.62266	-3.04715	-5.12335	-10.7584	12.6264	-2.53746	-9.73723	14.8845	-3.10858	-21.0907	-10.9191	-11.4916	20.1946	13.776	8.75423	-5.28535	-2.38177	-1.75727	-21.4307	-10.9559	-11.7743	33.4194	18.3891	11.7073	-2.97873
197.1	-8.78105	-8.64372	-8.66299	19.2907	16.3923	12.8787	-5.966	-3.06341	-2.80488	-9.22149	-9.95243	-9.35451	16.1573	15.8733	16.5951	-2.99466	-3.00071	-3.04626	-9.36706	-9.49287	-9.40375	20.2668	21.5208	20.0089	-4.6177	-2.96903	-5.06438	-10.6597	12.9343	-2.54186	-9.75893	15.1932	-3.09852	-20.9823	-10.8179	-11.4043	20.5742	13.9897	8.90996	-5.28094	-2.40058	-1.69142	-21.2208	-10.8926	-11.632	33.7936	18.7243	11.9499	-2.9329
197	-8.6758	-8.48967	-8.57111	19.7064	16.7651	13.2466	-5.98671	-2.95613	-2.66819	-9.10808	-9.8902	-9.2268	16.557	16.1344	16.9117	-2.9023	-2.98126	-2.99308	-9.24202	-9.32781	-9.26262	20.5181	21.7033	20.3496	-4.55032	-2.98961	-5.00018	-10.5175	13.3255	-2.58647	-9.62165	15.6912	-3.02755	-20.9071	-10.6146	-11.3372	21.1578	14.3819	9.2525	-5.34642	-2.35342	-1.73753	-20.9976	-10.9818	-11.4845	34.0166	19.0001	12.1939	-2.8501
196.9	-8.58609	-8.32209	-8.47355	20.2348	17.015	13.522	-5.82089	-2.83745	-2.67189	-8.95287	-9.74475	-9.16646	16.8349	16.3101	17.3342	-2.84561	-2.94457	-2.94599	-9.02554	-9.18231	-9.10442	20.7238	21.9318	20.6575	-4.46043	-3.03036	-4.87741	-10.3704	13.717	-2.53447	-9.4494	16.0373	-2.88427	-20.9606	-10.5289	-11.2549	21.5655	14.6453	9.41429	-5.2982	-2.27213	-1.6533	-20.7776	-10.9116	-11.4599	34.2859	19.176	12.3962	-2.7803
196.8	-8.49583	-8.16969	-8.33497	20.7534	17.3214	13.7724	-5.74899	-2.82248	-2.60648	-8.72126	-9.6129	-9.01348	17.1189	16.6454	17.6641	-2.86403	-2.88962	-2.7487	-9.01053	-8.93092	-8.90101	21.0263	22.2414	21.0721	-4.33335	-3.013	-4.78156	-10.3199	14.0494	-2.51427	-9.33831	16.37	-2.79073	-20.6702	-10.5448	-11.1026	22.0986	14.9766	9.73159	-5.221	-2.21019	-1.60293	-20.5692	-10.8879	-11.3826	34.7012	19.5092	12.7591	-2.66073
196.7	-8.33531	-8.06977	-8.3051	21.1044	17.5368	14.015	-5.72874	-2.72921	-2.72463	-8.54529	-9.5748	-8.93813	17.4064	16.9661	17.8712	-2.74224	-2.81194	-2.70615	-8.81571	-8.85651	-8.88273	21.2209	22.6354	21.3638	-4.21525	-2.99442	-4.71986	-10.1233	14.4035	-2.55545	-9.35979	16.6642	-2.78283	-20.5814	-10.3432	-11.0598	22.4841	15.2459	10.0122	-5.22914	-2.20656	-1.61849	-20.5007	-10.7639	-11.2173	34.8845	19.7186	13.0075	-2.61442
196.6	-8.22684	-7.9433	-8.14037	21.5127	17.7795	14.3856	-5.60578	-2.68777	-2.70119	-8.35066	-9.32692	-8.79125	17.7941	17.323	18.1885	-2.72918	-2.80499	-2.67061	-8.70956	-8.65885	-8.75312	21.6074	23.0132	21.6829	-4.11455	-2.93259	-4.62951	-10.0675	14.6762	-2.42477	-9.23261	17.0925	-2.7018	-20.4005	-10.2964	-10.8437	22.9713	15.7009	10.2582	-5.21725	-2.15708	-1.5576	-20.1346	-10.6519	-11.1499	35.1917	20.0803	13.3287	-2.54226
196.5	-8.13428	-7.74197	-8.00215	21.8929	18.2036	14.6824	-5.60726	-2.59932	-2.64779	-8.14191	-9.22369	-8.63267	18.1682	17.5912	18.5646	-2.64683	-2.73635	-2.59668	-8.63376	-8.45896	-8.73718	21.8005	23.2152	21.9657	-4.08036	-2.82738	-4.50623	-10.064	14.9837	-2.3252	-9.20596	17.5775	-2.64426	-20.2327	-10.225	-10.7924	23.333	15.9334	10.4317	-5.18751	-2.10264	-1.48038	-19.9937	-10.5085	-11.0075	35.7034	20.3496	13.5161	-2.45472
196.4	-8.05519	-7.63785	-7.83078	22.2234	18.4124	14.9028	-5.55056	-2.59999	-2.57434	-7.93664	-9.13298	-8.43359	18.3462	17.9669	18.8738	-2.58296	-2.72568	-2.48696	-8.46849	-8.41078	-8.61549	21.9851	23.4464	22.2481	-3.95008	-2.76818	-4.45	-9.91367	15.1462	-2.26595	-9.07572	17.8376	-2.57968	-20.1119	-10.2164	-10.6332	23.7694	16.1368	10.5369	-5.2006	-2.0205	-1.40256	-19.8546	-10.3674	-11.0561	35.9867	20.4393	13.647	-2.48142
196.3	-7.96828	-7.53081	-7.71303	22.5078	18.726	15.2642	-5.4648	-2.58178	-2.62287	-7.86733	-9.01471	-8.40449	18.6157	18.3329	19.1423	-2.55359	-2.73694	-2.40901	-8.28583	-8.25213	-8.39297	22.2834	23.6277	22.6087	-3.8941	-2.70845	-4.40441	-9.78297	15.411	-2.2471	-8.8762	18.3308	-2.49752	-20.2128	-10.1866	-10.4413	24.2303	16.4448	10.884	-5.21846	-1.93933	-1.32491	-19.6223	-10.2721	-10.9276	36.1718	20.6648	13.8262	-2.37887
196.2	-7.77738	-7.48347	-7.51254	22.9517	19.1115	15.5341	-5.39388	-2.52777	-2.57127	-7.81613	-8.96264	-8.26096	19.066	18.6085	19.4535	-2.56013	-2.72613	-2.4383	-8.2731	-8.18106	-8.25601	22.5606	23.8758	22.9119	-3.7615	-2.67217	-4.3736	-9.6663	15.6511	-2.25916	-8.85765	18.645	-2.50443	-20.1535	-10.0572	-10.2727	24.666	16.7197	11.1292	-5.19199	-1.88943	-1.30019	-19.5068	-10.1747	-10.8561	36.4428	20.8067	14.0894	-2.43167
196.1	-7.62166	-7.45014	-7.45256	23.3673	19.4218	15.775	-5.31603	-2.50444	-2.47017	-7.65266	-8.81034	-8.1567	19.3591	18.9458	19.7149	-2.47061	-2.72666	-2.47025	-8.07539	-8.08034	-8.12023	22.868	24.1543	23.185	-3.7354	-2.60307	-4.28898	-9.49813	15.8963	-2.22294	-8.68108	18.933	-2.38034	-20.0324	-9.91341	-10.1789	25.1354	17.0396	11.3625	-5.17365	-1.87674	-1.24982	-19.3617	-10.0827	-10.6587	36.7664	21.0949	14.3035	-2.39284
196	-7.61331	-7.39881	-7.26782	23.6755	19.7348	16.0282	-5.29459	-2.39339	-2.42573	-7.56797	-8.58661	-8.08135	19.6192	19.2252	19.9638	-2.39634	-2.66496	-2.37093	-7.84472	-7.89463	-7.97155	23.2611	24.5136	23.306	-3.71134	-2.61531	-4.26374	-9.35341	16.1305	-2.23815	-8.51339	19.3685	-2.35121	-19.9275	-9.80814	-9.92693	25.549	17.331	11.6128	-5.11909	-1.95128	-1.15106	-19.0765	-9.85104	-10.5354	36.9555	21.2483	14.3721	-2.34921
195.9	-7.50345	-7.22868	-7.11904	23.8955	20.0063	16.3716	-5.17663	-2.35018	-2.35128	-7.48825	-8.40498	-8.00838	19.9268	19.4283	20.2169	-2.4017	-2.68368	-2.35553	-7.67269	-7.81885	-7.79358	23.4553	24.7235	23.5546	-3.61572	-2.5984	-4.28959	-9.13609	16.2919	-2.17923	-8.41644	19.54	-2.2915	-19.6087	-9.82054	-9.72002	25.9744	17.6462	11.9892	-5.12283	-1.90613	-1.16264	-18.8068	-9.81354	-10.2351	37.2551	21.4153	14.607	-2.29611
195.8	-7.35928	-7.02552	-7.00655	24.3514	20.2366	16.6588	-5.1098	-2.26888	-2.31211	-7.29183	-8.19201	-7.79461	20.2284	19.745	20.3875	-2.30409	-2.65719	-2.3909	-7.57863	-7.55203	-7.62328	23.6142	24.9168	23.8922	-3.50397	-2.54605	-4.1541	-8.95409	16.4623	-2.17003	-8.31773	19.7142	-2.21709	-19.3919	-9.75898	-9.54361	26.3596	17.9607	12.1738	-5.0272	-1.79129	-1.07067	-18.58	-9.66185	-10.1359	37.4657	21.6446	14.8522	-2.17509
195.7	-7.08984	-6.92816	-6.79073	24.5212	20.483	16.9422	-5.0628	-2.27247	-2.31546	-7.24921	-7.92873	-7.6474	20.5666	19.9554	20.792	-2.24089	-2.58026	-2.31713	-7.48728	-7.34126	-7.52014	23.8645	25.1327	24.216	-3.5046	-2.45541	-3.98538	-9.0443	16.737	-2.12688	-8.13057	20.0028	-2.17219	-19.0046	-9.72866	-9.33231	26.7425	18.1614	12.4075	-4.94814	-1.73991	-1.04805	-18.3743	-9.46309	-10.09	37.6784	21.9787	15.0901	-2.25416
195.6	-6.92366	-6.79836	-6.70141	24.875	20.666	17.1939	-5.03564	-2.12936	-2.25525	-7.09245	-7.81051	-7.57135	20.9106	20.0926	21.0639	-2.1657	-2.46952	-2.3227	-7.43248	-7.19081	-7.37248	23.9753	25.3164	24.382	-3.44278	-2.37472	-3.82281	-8.95466	17.016	-2.09907	-7.99059	20.156	-2.13987	-19.0488	-9.68015	-9.20516	27.0944	18.2942	12.5889	-4.87704	-1.67529	-1.02787	-18.2056	-9.23582	-10.009	37.6433	22.2813	15.3017	-2.18601
195.5	-6.77486	-6.80055	-6.56079	25.1259	20.9447	17.3408	-4.91681	-2.17744	-2.26147	-7.06036	-7.55903	-7.30205	21.0665	20.336	21.2311	-2.03005	-2.37277	-2.22337	-7.1228	-7.00882	-7.0766	24.2375	25.4614	24.4793	-3.32953	-2.33148	-3.75297	-8.87121	17.1934	-2.01095	-7.8238	20.3228	-2.08989	-18.7584	-9.51471	-9.08416	27.3951	18.4509	12.7499	-4.75374	-1.69237	-0.915339	-18.1473	-9.24865	-9.98254	37.779	22.4816	15.5673	-2.08324
195.4	-6.68023	-6.65223	-6.43641	25.2816	21.1176	17.5103	-4.81634	-2.13451	-2.31577	-7.0024	-7.35551	-7.18576	21.3262	20.6542	21.3279	-1.88651	-2.22197	-2.1484	-6.96826	-6.85494	-6.81549	24.4718	25.636	24.6536	-3.1581	-2.21698	-3.65215	-8.53942	17.248	-1.91087	-7.52891	20.5084	-1.94753	-18.5872	-9.41423	-9.06303	27.7137	18.548	12.9642	-4.64147	-1.7434	-0.88294	-17.8007	-9.14235	-9.7403	37.8329	22.6665	15.68	-2.0999
195.3	-6.51169	-6.44173	-6.27097	25.5432	21.3189	17.644	-4.79027	-2.0766	-2.33641	-6.95345	-7.19142	-7.10916	21.4951	20.77	21.611	-1.77749	-2.13741	-2.17929	-6.83695	-6.76692	-6.84723	24.5789	25.6711	24.8726	-3.07032	-2.19132	-3.59552	-8.36757	17.4208	-1.93606	-7.28043	20.6894	-1.92148	-18.2679	-9.22436	-9.06864	27.968	18.7187	13.1025	-4.62826	-1.6917	-0.819045	-17.5984	-9.02791	-9.57444	37.8819	22.7428	15.8681	-2.01473
195.2	-6.43194	-6.19669	-6.13058	25.8411	21.4451	17.843	-4.7607	-1.98441	-2.36201	-6.90633	-7.03556	-6.90676	21.6646	20.9786	21.8369	-1.68018	-2.11878	-2.2235	-6.76635	-6.57902	-6.71316	24.5821	25.7328	25.086	-3.02066	-2.10811	-3.52478	-8.24538	17.5977	-1.93133	-7.20827	20.853	-1.82201	-17.8053	-9.10505	-8.84415	28.3533	18.9835	13.3342	-4.61259	-1.66555	-0.700672	-17.3436	-8.92199	-9.50238	38.0276	22.9034	16.0461	-1.92578
195.1	-6.28552	-6.10669	-5.99781	26.0308	21.6448	18.0725	-4.6412	-1.99018	-2.343	-6.7603	-6.91987	-6.7108	21.7629	21.1252	22.015	-1.68016	-2.16028	-2.1478	-6.68909	-6.49625	-6.57378	24.7019	25.784	25.1507	-3.11763	-2.1044	-3.52181	-8.02812	17.7723	-1.89359	-7.11636	21.0017	-1.86213	-17.5538	-8.8726	-8.75338	28.6387	19.1907	13.3808	-4.53926	-1.5718	-0.706051	-17.197	-8.87044	-9.36393	38.0371	23.0434	16.2489	-1.86565
195	-6.20247	-5.90575	-5.92823	26.1654	21.7876	18.1282	-4.63801	-1.99745	-2.2798	-6.57136	-6.73175	-6.58697	22.0087	21.25	22.114	-1.77014	-2.17107	-2.1372	-6.49109	-6.32567	-6.33608	24.8652	25.9904	25.2362	-3.17544	-2.13158	-3.48401	-7.95109	17.935	-1.92753	-6.95873	21.1705	-1.80692	-17.3659	-8.69741	-8.57306	28.9879	19.4336	13.544	-4.44871	-1.59575	-0.751874	-16.9599	-8.59378	-9.18873	38.1791	23.0678	16.2764	-1.90311
194.9	-6.13058	-5.81813	-5.83986	26.356	21.9846	18.3199	-4.54538	-1.96781	-2.20768	-6.46023	-6.72176	-6.34834	22.1866	21.3921	22.3525	-1.79762	-2.14992	-2.20018	-6.42087	-6.26206	-6.24692	24.8991	26.1384	25.3384	-3.12506	-2.08245	-3.41523	-7.77603	18.0949	-1.84336	-6.83529	21.1644	-1.70594	-17.1727	-8.45024	-8.40102	29.1318	19.5486	13.6436	-4.46234	-1.5075	-0.668152	-16.6919	-8.31787	-9.01759	38.1822	23.3181	16.2822	-1.95165
194.8	-6.12038	-5.76092	-5.79214	26.5716	22.2957	18.632	-4.4155	-1.94796	-2.13185	-6.24896	-6.57276	-6.09259	22.4871	21.6353	22.5992	-1.73486	-2.08998	-2.18173	-6.31272	-6.05754	-6.0993	25.0371	26.3787	25.4448	-3.11404	-2.00195	-3.38756	-7.57515	18.3272	-1.80017	-6.5243	21.2172	-1.56626	-16.8966	-8.33017	-8.30781	29.3649	19.7953	13.6758	-4.41503	-1.3788	-0.649015	-16.2541	-8.10386	-8.77006	38.3521	23.4505	16.3542	-1.88581
194.7	-5.93826	-5.70901	-5.64469	26.8212	22.4559	18.8468	-4.38691	-1.88635	-2.01886	-6.16752	-6.50062	-5.98092	22.5804	21.8689	22.7201	-1.60596	-1.99236	-2.16472	-6.11619	-5.97243	-5.95851	25.1326	26.52	25.562	-3.03215	-1.91464	-3.35503	-7.44607	18.4109	-1.81797	-6.33486	21.3895	-1.54477	-16.4863	-8.29003	-8.16473	29.6239	19.9488	13.9135	-4.39076	-1.29978	-0.635321	-16.0063	-7.91004	-8.58798	38.3503	23.5887	16.5152	-1.82223
194.6	-5.8546	-5.59802	-5.52683	26.9198	22.4671	18.9185	-4.32649	-1.85553	-1.93613	-6.08998	-6.34399	-5.87402	22.7109	22.0236	22.8949	-1.57058	-1.96734	-2.13268	-6.07439	-5.92562	-5.7906	25.3714	26.5215	25.6903	-2.91629	-1.85013	-3.13787	-7.20693	18.531	-1.83651	-6.25788	21.6376	-1.53644	-16.3882	-8.19579	-8.01896	29.6259	20.0969	14.1088	-4.29558	-1.26614	-0.624814	-15.673	-7.85052	-8.47253	38.4887	23.6567	16.6671	-1.80944
194.5	-5.80022	-5.37903	-5.48778	27.0544	22.5882	19.0548	-4.25253	-1.91411	-1.84387	-6.09558	-6.18957	-5.75723	22.9472	22.1669	23.128	-1.45946	-1.8687	-2.10032	-5.92837	-5.55569	-5.62195	25.4283	26.7168	25.8784	-2.8659	-1.71983	-2.9791	-7.1746	18.7192	-1.73284	-6.12758	21.8341	-1.50883	-16.1245	-8.09099	-7.87699	29.8594	20.2237	14.0867	-4.12751	-1.17747	-0.530283	-15.2825	-7.72933	-8.19467	38.5556	23.799	16.813	-1.76038
194.4	-5.7205	-5.21833	-5.47021	27.2315	22.6772	19.2297	-4.19063	-1.84068	-1.81521	-5.9966	-6.02659	-5.75162	23.1222	22.2372	23.2244	-1.43239	-1.7723	-2.07865	-5.86371	-5.47056	-5.46926	25.4362	26.8924	25.9187	-2.73381	-1.68586	-2.86794	-7.00403	18.7581	-1.75074	-5.92807	21.9296	-1.48621	-15.9822	-7.93264	-7.72166	30.0375	20.2556	14.1559	-4.02095	-1.10762	-0.486824	-15.1029	-7.62718	-8.09472	38.5574	23.8388	16.9056	-1.73984
194.3	-5.62743	-5.13422	-5.38967	27.41	22.8566	19.381	-4.11546	-1.77061	-1.75638	-5.93393	-5.79437	-5.63486	23.348	22.2444	23.33	-1.34032	-1.76074	-2.05246	-5.6472	-5.37236	-5.29131	25.5993	27.2129	26.0513	-2.72795	-1.66043	-2.75953	-6.89814	18.7844	-1.65565	-5.82487	22.1429	-1.47885	-15.788	-7.86459	-7.54655	30.2026	20.4662	14.3013	-3.94316	-1.06174	-0.47617	-14.8945	-7.49201	-7.95098	38.4359	23.9723	16.9935	-1.74243
194.2	-5.48232	-4.9951	-5.28653	27.4305	23.0438	19.5113	-4.0029	-1.69204	-1.75207	-5.67741	-5.64532	-5.51774	23.3936	22.3352	23.5291	-1.36713	-1.73229	-1.98904	-5.51816	-5.13705	-5.18752	25.9183	27.5787	26.2053	-2.66322	-1.57921	-2.6009	-6.79489	18.782	-1.64473	-5.68259	22.3301	-1.43876	-15.5304	-7.72027	-7.29924	30.2553	20.6066	14.3998	-3.80465	-1.04903	-0.425756	-14.5522	-7.25037	-8.06308	38.4525	24.1238	17.0368	-1.60255
194.1	-5.23168	-4.85938	-5.23151	27.5432	23.1983	19.5639	-3.84007	-1.68943	-1.67731	-5.60101	-5.55715	-5.36849	23.5872	22.5317	23.5341	-1.39097	-1.64145	-1.95449	-5.39995	-5.07232	-5.01227	26.0718	27.7858	26.3485	-2.59501	-1.51305	-2.52982	-6.74019	18.8585	-1.66884	-5.56361	22.4905	-1.45307	-15.182	-7.62007	-7.01653	30.4702	20.768	14.5466	-3.75166	-1.05149	-0.445382	-14.3841	-7.17886	-7.8871	38.5441	24.2602	17.2049	-1.57105
194	-5.08375	-4.76673	-5.1226	27.6595	23.3152	19.6285	-3.85955	-1.6175	-1.60679	-5.46019	-5.39007	-5.32109	23.7237	22.5608	23.6509	-1.38242	-1.70446	-1.9666	-5.28043	-5.02127	-4.83985	26.1235	27.8292	26.472	-2.56526	-1.45799	-2.46712	-6.51182	18.9172	-1.55482	-5.4261	22.6027	-1.4336	-14.996	-7.40685	-6.86434	30.573	20.9822	14.5681	-3.69649	-1.09584	-0.406986	-14.1249	-7.03012	-7.57028	38.4104	24.1769	17.2944	-1.52656
193.9	-4.89797	-4.69253	-4.94787	27.8492	23.4597	19.6958	-3.66735	-1.60414	-1.55146	-5.31563	-5.24455	-5.14118	23.9279	22.7619	23.819	-1.36573	-1.69269	-2.03398	-5.01391	-4.85844	-4.65406	26.1801	27.7912	26.508	-2.52205	-1.43602	-2.38448	-6.34601	18.9755	-1.47553	-5.18163	22.6433	-1.39582	-14.7651	-7.18589	-6.71831	30.6486	21.0885	14.6742	-3.55607	-1.11224	-0.31319	-13.7364	-6.91153	-7.35615	38.42	24.2175	17.3497	-1.53492
193.8	-4.72603	-4.55655	-4.86062	27.8911	23.5224	19.7032	-3.52678	-1.58339	-1.51791	-5.11547	-5.18524	-4.96092	23.9317	22.938	24.0501	-1.30356	-1.62362	-2.0103	-4.77579	-4.73361	-4.55744	26.0805	27.8584	26.6081	-2.36952	-1.35667	-2.26993	-6.16319	19.0712	-1.52197	-5.13063	22.6634	-1.36486	-14.5732	-6.93441	-6.58218	30.7302	20.9774	14.7793	-3.42766	-1.06065	-0.275785	-13.547	-6.67805	-7.04983	38.2793	24.1474	17.4543	-1.48636
193.7	-4.54358	-4.47843	-4.75817	28.0289	23.5509	19.8229	-3.36392	-1.60658	-1.47681	-4.93624	-4.88832	-4.84837	24.0109	22.9416	24.1221	-1.23534	-1.54886	-2.03996	-4.61014	-4.60772	-4.23994	26.2207	27.9449	26.7155	-2.22494	-1.34071	-2.19679	-5.99567	19.212	-1.5249	-4.96099	22.6473	-1.34487	-14.4545	-6.70501	-6.39188	30.9951	21.0923	14.9646	-3.34326	-0.99172	-0.222395	-13.3471	-6.48161	-6.78255	38.0594	24.3015	17.5493	-1.44866
193.6	-4.46681	-4.39158	-4.60489	28.1574	23.5581	19.8704	-3.28471	-1.54558	-1.39693	-4.82623	-4.79596	-4.77204	24.1824	23.0167	24.2381	-1.13605	-1.53914	-1.96217	-4.46001	-4.44498	-4.04251	26.327	28.0754	26.7564	-2.21645	-1.26393	-2.16214	-5.98669	19.3326	-1.46693	-4.80898	22.7526	-1.28615	-14.0596	-6.26796	-6.33669	30.9282	21.2227	15.0528	-3.23839	-0.997403	-0.0895995	-13.0854	-6.36001	-6.47942	37.9767	24.2717	17.5747	-1.44725
193.5	-4.23306	-4.30561	-4.39536	28.2285	23.6158	19.8345	-3.20032	-1.55516	-1.27087	-4.62049	-4.7361	-4.52976	24.2254	23.0842	24.3785	-1.11663	-1.36889	-1.90493	-4.38653	-4.41864	-3.90486	26.4303	28.0876	26.8205	-2.12757	-1.2497	-1.98707	-5.90028	19.3684	-1.38176	-4.69414	22.8889	-1.35724	-13.6899	-6.11038	-6.26274	31.0135	21.2867	15.0531	-3.1203	-1.00089	-0.0866029	-12.9203	-6.11128	-6.29401	37.9161	24.3777	17.63	-1.46427
193.4	-4.17781	-4.03078	-4.31961	28.2147	23.5509	19.8314	-3.02907	-1.54601	-1.1603	-4.43755	-4.53391	-4.3477	24.2537	23.1382	24.4649	-1.0181	-1.31966	-1.79368	-4.13621	-4.17468	-3.71808	26.3821	28.176	26.8792	-2.04699	-1.14315	-2.01782	-5.67744	19.4757	-1.34451	-4.64411	23.0262	-1.22015	-13.3434	-5.98507	-6.24178	31.0446	21.2301	15.1543	-3.04452	-0.870507	-0.0745963	-12.7636	-5.87835	-6.19863	37.9071	24.4193	17.6596	-1.3964
193.3	-3.85628	-3.80089	-4.1853	28.2454	23.551	19.7545	-3.00961	-1.53438	-1.06406	-4.24065	-4.36111	-4.20542	24.3395	23.1118	24.6254	-0.944369	-1.29216	-1.69709	-4.01919	-3.89228	-3.46754	26.3478	28.1885	26.9228	-1.9107	-1.04883	-1.90003	-5.55591	19.4744	-1.24206	-4.56647	22.9487	-1.15574	-12.9566	-5.78714	-5.99973	31.0857	21.3716	15.2443	-2.93787	-0.8226	-0.0656495	-12.3088	-5.74337	-6.00927	37.7561	24.6215	17.812	-1.30938
193.2	-3.80091	-3.6723	-4.10702	28.3682	23.501	19.8773	-2.90832	-1.53425	-1.07439	-4.21131	-4.16793	-3.95131	24.5295	23.0949	24.7469	-0.871595	-1.14971	-1.71153	-3.80616	-3.65501	-3.4053	26.4644	28.2627	26.9434	-1.87462	-0.904093	-1.72395	-5.4824	19.5538	-1.21262	-4.28343	23.0776	-1.12724	-12.7188	-5.51653	-5.95605	31.0732	21.2875	15.2001	-2.93284	-0.802756	-0.0726691	-12.1723	-5.55727	-5.80219	37.7598	24.7044	17.8555	-1.30383
193.1	-3.74803	-3.57365	-3.97745	28.3519	23.6086	19.8687	-2.90785	-1.53071	-1.06539	-4.0804	-4.10256	-3.8385	24.5704	23.0275	24.7855	-0.805994	-1.10588	-1.67247	-3.6392	-3.52904	-3.20759	26.4624	28.2943	26.8114	-1.77046	-0.820533	-1.60099	-5.41242	19.6214	-1.12944	-4.21817	23.1136	-1.17953	-12.3913	-5.40048	-5.92865	31.135	21.4122	15.1624	-2.82135	-0.741848	-0.0050468	-11.9154	-5.38451	-5.70352	37.6554	24.74	17.8909	-1.39345
193	-3.641	-3.34146	-3.8712	28.3455	23.6994	19.9174	-2.79376	-1.41793	-0.997235	-3.84949	-4.03354	-3.68027	24.4641	23.2016	24.8046	-0.794386	-1.04286	-1.67115	-3.42003	-3.36774	-3.08843	26.3582	28.3419	26.7999	-1.62293	-0.790614	-1.63181	-5.10279	19.6773	-1.08703	-4.10249	23.2812	-1.08367	-12.3347	-5.08107	-5.81362	31.197	21.5816	15.2462	-2.75172	-0.698217	0.00769928	-11.598	-5.40627	-5.53021	37.3921	24.7578	17.8957	-1.362
192.9	-3.50939	-3.20461	-3.66311	28.3883	23.7429	19.7985	-2.69308	-1.37298	-1.06014	-3.7543	-3.83287	-3.48797	24.454	23.2413	24.8392	-0.755723	-1.06218	-1.6717	-3.1846	-3.35547	-2.89399	26.3424	28.3628	26.9312	-1.54866	-0.767366	-1.64657	-5.03535	19.7213	-1.04139	-3.98438	23.2677	-1.05673	-12.0627	-4.82847	-5.53146	31.1922	21.589	15.2321	-2.70094	-0.748376	0.0693418	-11.1698	-5.23842	-5.39469	37.2631	24.7476	17.9808	-1.31672
192.8	-3.41362	-3.02892	-3.60045	28.3277	23.7176	19.7617	-2.63283	-1.37257	-1.06809	-3.56772	-3.82302	-3.28016	24.422	23.263	24.8811	-0.735653	-1.02776	-1.7103	-3.16545	-3.24181	-2.89009	26.3486	28.4194	26.8991	-1.59813	-0.792386	-1.4957	-4.78203	19.8055	-1.02854	-3.87497	23.279	-1.14669	-11.9172	-4.72871	-5.32641	31.2882	21.5812	15.2835	-2.67955	-0.64432	0.027813	-10.816	-5.23273	-5.1632	37.1534	24.789	18.0056	-1.32051
192.7	-3.21491	-2.85458	-3.61118	28.4485	23.8116	19.7917	-2.51012	-1.33755	-0.960944	-3.38357	-3.70045	-3.20849	24.4182	23.2818	24.9707	-0.739602	-1.09655	-1.73232	-3.09661	-3.15198	-2.78792	26.3206	28.4627	26.9437	-1.55309	-0.739966	-1.42024	-4.63511	19.9366	-1.02107	-3.87327	23.3306	-1.1274	-11.5305	-4.53182	-4.92189	31.2915	21.734	15.342	-2.66876	-0.555917	0.0568018	-10.7654	-5.15394	-5.00795	37.029	24.6957	17.9312	-1.20342
192.6	-3.12009	-2.81396	-3.4766	28.539	23.8735	19.753	-2.33049	-1.24057	-0.904254	-3.17929	-3.50825	-3.09238	24.377	23.2908	25.0551	-0.733124	-1.06358	-1.61757	-2.96648	-2.98162	-2.51313	26.3489	28.4408	26.943	-1.40147	-0.721183	-1.3323	-4.6565	19.9219	-0.930512	-3.70609	23.3406	-1.10725	-11.4203	-4.5124	-4.6094	31.2564	21.7359	15.3739	-2.66895	-0.519043	0.175935	-10.4994	-4.90595	-4.81469	37.0694	24.6532	17.9369	-1.20297
192.5	-2.90284	-2.75213	-3.43184	28.4299	23.8129	19.8566	-2.2359	-1.32763	-0.844044	-3.0742	-3.4398	-3.09964	24.382	23.3208	24.9861	-0.597778	-1.05152	-1.50166	-2.70795	-2.90148	-2.35433	26.4387	28.4728	26.8235	-1.29637	-0.691105	-1.18569	-4.34144	20.0462	-0.898847	-3.55932	23.3466	-1.10496	-11.372	-4.40677	-4.65836	31.1783	21.7977	15.3761	-2.57869	-0.474885	0.259003	-10.2209	-4.82239	-4.58538	36.8076	24.6588	17.8255	-1.2232
192.4	-2.73416	-2.46415	-3.28056	28.4757	23.5931	19.7499	-2.04172	-1.35608	-0.791114	-3.04997	-3.33555	-2.88479	24.4133	23.3639	25.083	-0.43654	-0.906706	-1.47237	-2.52901	-2.68321	-2.22101	26.4451	28.4686	26.7691	-1.15909	-0.609922	-0.999013	-4.18378	20.0708	-0.794642	-3.37577	23.3379	-1.04661	-11.0074	-4.32419	-4.40397	31.0867	21.7301	15.3717	-2.51468	-0.365398	0.357888	-9.89439	-4.59114	-4.41593	36.6024	24.6655	17.7969	-1.15356
192.3	-2.64115	-2.42613	-3.0459	28.454	23.6399	19.8265	-1.90385	-1.30787	-0.757718	-2.82425	-3.24394	-2.82949	24.3557	23.4192	25.0804	-0.24485	-0.85472	-1.4268	-2.49115	-2.44577	-2.03521	26.3945	28.4089	26.8081	-1.08826	-0.555979	-0.853685	-4.05929	20.0522	-0.703201	-3.22365	23.5122	-1.04301	-10.749	-4.28612	-4.27869	30.9833	21.6599	15.355	-2.4162	-0.337361	0.351704	-9.53638	-4.59627	-4.25979	36.4618	24.6178	17.944	-1.09086
192.2	-2.45628	-2.26698	-2.94968	28.3388	23.441	19.7461	-1.83637	-1.25985	-0.790721	-2.82715	-3.14196	-2.69096	24.3114	23.3276	24.8274	-0.057041	-0.795536	-1.24681	-2.29152	-2.10828	-1.86628	26.3969	28.2377	26.7783	-0.984745	-0.515751	-0.809201	-3.99281	20.0758	-0.695266	-3.28176	23.6014	-0.996196	-10.6913	-4.28671	-4.1765	31.0084	21.7422	15.3253	-2.27259	-0.340437	0.314942	-9.38043	-4.40508	-4.2218	36.2564	24.3745	17.9632	-1.01113
192.1	-2.39061	-2.19418	-2.75833	28.2733	23.3726	19.6748	-1.82159	-1.2384	-0.826965	-2.71448	-3.0202	-2.67185	24.1796	23.2825	24.688	-0.119457	-0.70443	-1.17278	-2.16576	-1.9545	-1.69396	26.2763	28.1273	26.7353	-0.94685	-0.451694	-0.707274	-3.90072	20.085	-0.5704	-3.17425	23.6942	-0.979061	-10.6018	-4.11861	-4.03669	30.8711	21.6867	15.3468	-2.11359	-0.33896	0.318035	-9.17773	-4.42064	-4.11853	35.8469	24.3347	17.9613	-1.0051
192	-2.29128	-2.11769	-2.69905	28.1452	23.4229	19.6279	-1.6503	-1.18774	-0.797988	-2.55569	-2.8459	-2.63933	24.2227	23.176	24.6627	-0.014742	-0.670088	-1.1549	-1.8941	-1.69437	-1.64231	26.1482	28.0451	26.5854	-0.91959	-0.399458	-0.59848	-3.75753	20.0641	-0.540285	-3.11018	23.6069	-0.97494	-10.3133	-3.84864	-3.79397	30.8193	21.6027	15.1858	-1.9366	-0.288809	0.40447	-9.1329	-4.24557	-3.98065	35.796	24.2203	17.8077	-0.963751
191.9	-2.10636	-2.11389	-2.47991	28.1142	23.3623	19.5227	-1.54545	-1.12156	-0.801831	-2.23742	-2.77369	-2.47608	24.1997	23.1079	24.6917	-0.0436299	-0.57091	-1.08339	-1.77952	-1.65623	-1.48606	26.2173	27.8777	26.4262	-0.811986	-0.373589	-0.59071	-3.65092	20.1151	-0.508473	-2.87184	23.6228	-0.904754	-10.1538	-3.68378	-3.68671	30.8144	21.6269	15.2435	-1.93943	-0.283147	0.409848	-8.92676	-4.02495	-3.87089	35.7238	24.2346	17.8627	-0.899137
191.8	-1.96395	-2.10699	-2.30746	27.9494	23.3114	19.5167	-1.42883	-1.05642	-0.756568	-2.06897	-2.66825	-2.35627	24.0792	23.156	24.5441	-0.0283269	-0.580341	-1.03124	-1.77525	-1.49314	-1.37107	26.0958	27.624	26.4439	-0.744157	-0.321373	-0.579383	-3.49392	20.081	-0.457312	-2.74077	23.6409	-0.875937	-9.99579	-3.44017	-3.42858	30.7305	21.5651	15.2519	-1.90189	-0.220923	0.332409	-8.75063	-3.84725	-3.85954	35.5154	24.1346	17.8165	-0.823467
191.7	-1.83121	-2.02071	-2.16031	27.8032	23.2528	19.4261	-1.34812	-1.00778	-0.68666	-2.01961	-2.51164	-2.22078	23.9061	23.1249	24.5593	0.00753686	-0.429286	-1.00261	-1.57595	-1.27365	-1.3351	25.9435	27.3285	26.3104	-0.609015	-0.271654	-0.580419	-3.22735	20.1176	-0.445645	-2.58862	23.5149	-0.802909	-9.79345	-3.2731	-3.28017	30.6728	21.5039	15.0867	-1.79404	-0.203294	0.322294	-8.55231	-3.72005	-3.71081	35.3152	23.9195	17.798	-0.745313
191.6	-1.7813	-1.9988	-2.02305	27.794	23.1727	19.3547	-1.2234	-1.06797	-0.632214	-1.9788	-2.4422	-2.1187	23.8222	23.177	24.5931	0.099345	-0.378186	-1.01669	-1.47182	-1.20347	-1.18157	25.7801	27.1304	26.2658	-0.523543	-0.292566	-0.54649	-3.05531	20.1199	-0.371572	-2.53059	23.3729	-0.779811	-9.72045	-3.17157	-3.16517	30.6759	21.4981	15.0994	-1.69485	-0.169442	0.394308	-8.46212	-3.58308	-3.37059	35.2007	23.878	17.7384	-0.755881
191.5	-1.78136	-1.94135	-1.95177	27.711	23.0679	19.3386	-1.22048	-0.970903	-0.595046	-1.86715	-2.30379	-1.97223	23.671	23.0884	24.5746	0.186325	-0.363309	-0.967962	-1.27179	-0.997706	-1.07815	25.5962	26.9875	26.1443	-0.35284	-0.236791	-0.497016	-2.84629	20.0802	-0.260138	-2.39151	23.2142	-0.788711	-9.52965	-2.97632	-3.04233	30.6069	21.3257	15.1756	-1.6439	-0.210192	0.429325	-8.12516	-3.36997	-3.29007	34.8712	23.8569	17.7026	-0.838078
191.4	-1.66078	-1.71266	-1.8325	27.5749	22.9774	19.4177	-1.04855	-0.892585	-0.658417	-1.82407	-2.20731	-1.73786	23.4782	23.0274	24.4483	0.297827	-0.319127	-0.999128	-0.987732	-0.707801	-0.855361	25.4409	26.9233	25.933	-0.235846	-0.19014	-0.413694	-2.62171	20.0301	-0.231331	-2.2607	23.0617	-0.766283	-9.34217	-3.04433	-2.99993	30.5024	20.9778	15.1847	-1.63002	-0.0650638	0.49838	-7.87164	-2.93291	-3.03783	34.325	23.7604	17.466	-0.874384
191.3	-1.61978	-1.56705	-1.76341	27.3488	22.8632	19.4064	-1.08678	-0.830193	-0.652411	-1.70505	-2.03923	-1.56508	23.2417	22.9205	24.3321	0.266123	-0.196883	-0.876248	-0.914277	-0.550116	-0.587379	25.2723	26.8321	25.7931	-0.184489	-0.152885	-0.353741	-2.53567	19.9874	-0.237939	-2.10712	23.0301	-0.686049	-9.06832	-2.93727	-2.74111	30.4856	20.9959	15.1168	-1.51307	0.00558024	0.52436	-7.60362	-2.74499	-2.99437	34.0121	23.6956	17.3829	-0.804846
191.2	-1.56204	-1.54006	-1.74346	27.2208	22.7883	19.3128	-1.01383	-0.802533	-0.678536	-1.77047	-1.87205	-1.46467	23.1542	22.7844	24.1797	0.272134	-0.109595	-0.84665	-0.785703	-0.355725	-0.393709	25.1028	26.6318	25.6625	-0.140102	-0.0684169	-0.381067	-2.43227	19.8725	-0.184855	-1.81969	22.935	-0.60067	-8.79731	-2.84808	-2.67254	30.5251	21.0391	15.0008	-1.5067	0.0826409	0.497531	-7.49589	-2.57728	-2.95199	33.5935	23.6904	17.202	-0.8138
191.1	-1.40758	-1.48908	-1.48941	26.9771	22.7518	19.206	-1.00206	-0.719859	-0.716535	-1.7056	-1.71164	-1.39068	22.9445	22.7234	24.0222	0.267958	-0.0421387	-0.755751	-0.597011	-0.3142	-0.353669	24.9535	26.4946	25.4104	-0.0749922	-0.0196841	-0.365444	-2.38033	19.8287	-0.122774	-1.70099	22.9197	-0.593458	-8.45658	-2.82476	-2.51572	30.3978	21.0352	14.9055	-1.37745	0.147425	0.427509	-7.29278	-2.50499	-2.84828	33.4326	23.361	17.1627	-0.815121
191	-1.29575	-1.381	-1.36535	26.9138	22.6848	19.1267	-0.932865	-0.725714	-0.764963	-1.50809	-1.57975	-1.30456	22.8649	22.5259	23.9437	0.270738	0.0777075	-0.72938	-0.484151	-0.154785	-0.279177	24.7336	26.2357	25.158	0.0189832	0.0850322	-0.265761	-2.25518	19.7972	-0.109556	-1.63011	22.7863	-0.512047	-8.31189	-2.74423	-2.33786	30.3471	20.8727	14.8863	-1.39655	0.221659	0.368567	-7.12486	-2.41322	-2.79998	33.2057	23.3778	17.1875	-0.709595
190.9	-1.16627	-1.34106	-1.35793	26.8334	22.5492	19.1251	-0.810874	-0.635837	-0.770408	-1.38242	-1.31997	-1.18676	22.6678	22.4367	23.8678	0.322884	0.0874781	-0.613638	-0.287122	-0.095755	-0.146962	24.5197	26.1129	25.1169	0.0614439	0.0928581	-0.164183	-2.17234	19.7301	-0.0251295	-1.47933	22.6673	-0.413732	-8.18892	-2.773	-2.1214	30.3675	20.7429	14.868	-1.31667	0.273806	0.383402	-6.82523	-2.37758	-2.70141	32.9632	23.1945	17.1708	-0.601749
190.8	-1.13315	-1.23104	-1.18241	26.7284	22.4651	19.1655	-0.759987	-0.593856	-0.798038	-1.33699	-1.29209	-1.0561	22.5206	22.2523	23.793	0.34539	0.130007	-0.568702	-0.180931	-0.104761	0.0277235	24.4707	25.9798	24.9869	0.0806402	0.128835	-0.198514	-1.95861	19.6602	0.00092335	-1.24338	22.5169	-0.445131	-7.91907	-2.52304	-1.86498	30.1443	20.6553	14.8219	-1.24533	0.30132	0.386527	-6.54384	-2.15593	-2.54632	32.739	23.016	17.0639	-0.538293
190.7	-1.12534	-1.27718	-1.12167	26.6106	22.3731	19.0964	-0.691023	-0.49012	-0.82488	-1.19836	-1.27839	-0.950123	22.2873	22.1921	23.5739	0.404388	0.176956	-0.587223	-0.0116834	-0.11918	0.175629	24.3132	25.8755	24.8334	0.201969	0.113173	-0.173679	-1.89121	19.6352	0.0556622	-0.988721	22.5586	-0.498751	-7.70673	-2.3795	-1.78804	30.0282	20.5205	14.7942	-1.20998	0.389637	0.416606	-6.45293	-2.17002	-2.43247	32.374	22.9669	17.012	-0.538119
190.6	-1.04738	-1.31555	-1.12547	26.5269	22.3641	19	-0.59758	-0.462973	-0.75812	-1.09262	-1.18526	-0.809085	22.257	22.1846	23.4959	0.485366	0.223524	-0.515058	0.0821894	-0.125603	0.354763	24.0265	25.6615	24.6068	0.34432	0.115978	-0.0780474	-1.60648	19.5486	0.0360637	-0.935602	22.4085	-0.389629	-7.3657	-2.22676	-1.49185	29.9736	20.5043	14.789	-1.10159	0.383588	0.476884	-6.16414	-1.84561	-2.40371	32.0784	22.788	16.9115	-0.513182
190.5	-0.996895	-1.20121	-1.09736	26.3682	22.2528	18.847	-0.506632	-0.404866	-0.757755	-1.00716	-1.14527	-0.720798	22.196	22.0443	23.3653	0.509951	0.223421	-0.454611	0.107646	-0.0720948	0.439703	23.858	25.4783	24.5086	0.3361	0.100126	-0.0379804	-1.59801	19.4772	0.0148523	-0.793715	22.3553	-0.305305	-7.09585	-2.18937	-1.34439	29.8661	20.4102	14.715	-1.05888	0.356617	0.433422	-5.89418	-1.54759	-2.25427	31.7536	22.6702	16.8784	-0.378396
190.4	-0.864962	-1.17607	-0.942389	26.1811	21.9565	18.7063	-0.379541	-0.392305	-0.658935	-0.922756	-1.04289	-0.665478	22.0259	21.8615	23.2026	0.558363	0.285312	-0.39514	0.193015	-0.0730973	0.608074	23.7568	25.2905	24.4488	0.355299	0.172073	-0.0069451	-1.46523	19.3411	0.0431446	-0.634012	22.1865	-0.24999	-7.02458	-2.01862	-1.07262	29.7288	20.2463	14.6733	-0.920494	0.357714	0.411726	-5.72998	-1.39762	-2.16388	31.4506	22.3948	16.6704	-0.365557
190.3	-0.635544	-1.08659	-0.889631	26.0744	21.7225	18.6006	-0.38637	-0.370028	-0.716128	-0.851971	-1.0455	-0.623845	21.9186	21.6661	22.9577	0.579932	0.343839	-0.230923	0.318944	0.0195945	0.886614	23.5389	25.1144	24.2663	0.408112	0.208675	0.012939	-1.35567	19.3474	-0.0119858	-0.54475	21.9707	-0.200578	-6.67498	-2.00636	-0.929808	29.7129	20.0685	14.577	-0.941436	0.380325	0.445396	-5.46109	-1.1769	-1.96893	31.2326	22.2055	16.5817	-0.37877
190.2	-0.562598	-0.945491	-0.793373	25.7426	21.5221	18.522	-0.306411	-0.375724	-0.592538	-0.759971	-0.995544	-0.59343	21.8604	21.4938	22.726	0.723402	0.405185	-0.143217	0.421062	0.243821	0.922913	23.4281	24.7937	24.0591	0.541478	0.280999	0.0599877	-1.12285	19.1249	-0.0133488	-0.408071	21.8005	-0.128469	-6.31745	-1.99093	-0.963348	29.5738	20.0234	14.6385	-0.807111	0.5389	0.403533	-5.48031	-0.98987	-1.73824	30.8825	22.081	16.4116	-0.352671
190.1	-0.48223	-0.95568	-0.699853	25.6033	21.3814	18.4713	-0.251657	-0.394404	-0.613255	-0.67667	-0.882506	-0.463164	21.7708	21.4261	22.5123	0.751654	0.396393	-0.045406	0.670172	0.592922	1.08542	23.1611	24.5042	23.9206	0.548709	0.303092	0.0537735	-1.03462	18.9978	0.104301	-0.12867	21.8085	-0.0094599	-6.18975	-1.80716	-0.86008	29.55	20.0028	14.6361	-0.73497	0.545591	0.428723	-5.24281	-0.750201	-1.74417	30.6372	21.9639	16.3245	-0.485438
[truncated: 167 more columns]

## Sheet: 222 and 210 calculation
pepConc (uM)	100	100	100	100	100	100	100	100	100	100	100	100	100	100	100	100	100	100	100	100	100	100	100	100	100	100	100	100	100	100	100	100	100	100	100	100	100	100	100	100	100	100	100	100	100	100	100	100	100
pep	AtLEA4-2	AtLEA4-2	AtLEA4-2	AtLEA4-2	AtLEA4-2	AtLEA4-2	AtLEA4-2	AtLEA4-2	AtLEA4-2	AtLEA4-2	AtLEA4-2	AtLEA4-2	AtLEA4-2	AtLEA4-2	AtLEA4-2	AtLEA4-2	AtLEA4-2	AtLEA4-2	AtLEA4-2	AtLEA4-2	AtLEA4-2	AtLEA4-2	AtLEA4-2	AtLEA4-2	AtLEA4-2	AtLEA4-2	AtLEA4-2	AtLEA4-2	AtLEA4-2	AtLEA4-2	AtLEA4-2	AtLEA4-2	AtLEA4-2	HeLEA68614	HeLEA68614	HeLEA68614	HeLEA68614	HeLEA68614	HeLEA68614	HeLEA68614	HeLEA68614	HeLEA68614	HeLEA68614	HeLEA68614	HeLEA68614	HeLEA68614	HeLEA68614	HeLEA68614	HeLEA68614
solConc (mM)	0	0	0	0	0	0	0	0	0	10	10	10	10	10	10	10	10	10	10	10	10	10	10	10	10	10	10	0.1	0.1	0.1	0.1	0.1	0.1	0	0	0	0	0	0	0	0	0	10	10	10	10	10	10	10
sol	None	None	None	None	None	None	None	None	None	Trehalose	Trehalose	Trehalose	Trehalose	Trehalose	Trehalose	Trehalose	Trehalose	Trehalose	Sucrose	Sucrose	Sucrose	Sucrose	Sucrose	Sucrose	Sucrose	Sucrose	Sucrose	Trehalose	Trehalose	Trehalose	Sucrose	Sucrose	Sucrose	None	None	None	None	None	None	None	None	None	Trehalose	Trehalose	Trehalose	Trehalose	Trehalose	Trehalose	Trehalose
time	0min	0min	0min	60min	60min	60min	60min	60min	60min	0min	0min	0min	60min	60min	60min	60min	60min	60min	0min	0min	0min	60min	60min	60min	60min	60min	60min	0min	60min	60min	0min	60min	60min	0min	0min	0min	60min	60min	60min	60min	60min	60min	0min	0min	0min	60min	60min	60min	60min
state	Aqueous	Aqueous	Aqueous	Desiccated	Desiccated	Desiccated	Rehydrated	Rehydrated	Rehydrated	Aqueous	Aqueous	Aqueous	Desiccated	Desiccated	Desiccated	Rehydrated	Rehydrated	Rehydrated	Aqueous	Aqueous	Aqueous	Desiccated	Desiccated	Desiccated	Rehydrated	Rehydrated	Rehydrated	Aqueous	Desiccated	Rehydrated	Aqueous	Desiccated	Rehydrated	Aqueous	Aqueous	Aqueous	Desiccated	Desiccated	Desiccated	Rehydrated	Rehydrated	Rehydrated	Aqueous	Aqueous	Aqueous	Desiccated	Desiccated	Desiccated	Rehydrated
222	-2.58378	-2.52992	-2.69224	-15.5643	-13.3294	-10.5275	-2.14671	-1.16455	-1.29637	-3.04786	-2.90483	-3.02526	-12.1406	-12.0636	-12.9174	-1.57452	-1.26948	-1.45657	-3.03834	-3.13156	-3.22653	-12.1436	-12.518	-12.2201	-2.0488	-1.14675	-2.26492	-3.03782	-10.1901	-1.12713	-2.86601	-12.5949	-1.24667	-3.53037	-3.57117	-3.58633	-16.4442	-11.2427	-8.65757	-1.45233	-1.59486	-1.20401	-3.84318	-3.45573	-3.4458	-19.1857	-11.941	-9.16092	-1.19721
210	-4.5854	-4.46828	-4.49305	-15.749	-13.8053	-11.1111	-3.43848	-2.07992	-1.79482	-5.11711	-4.82017	-4.99688	-12.6855	-11.6826	-12.6655	-1.79822	-1.68274	-2.08839	-4.97346	-5.12823	-5.13802	-9.44546	-11.2837	-10.7503	-2.89194	-2.30101	-4.03631	-5.69324	-11.352	-1.85706	-5.06361	-12.7321	-1.76206	-7.37483	-5.56436	-5.68703	-18.7137	-12.4573	-9.77165	-2.36097	-2.34384	-1.65965	-7.44556	-5.93011	-5.68831	-14.6373	-11.0282	-10.4618	-1.85112
222/210	0.56348	0.566195	0.599201	0.988272	0.965528	0.947476	0.624319	0.559901	0.722284	0.595621	0.602641	0.60543	0.957045	1.03261	1.01989	0.875599	0.754412	0.697461	0.610911	0.610651	0.627971	1.28565	1.10939	1.13672	0.708452	0.498368	0.561136	0.533584	0.897648	0.606943	0.566001	0.989224	0.707507	0.478705	0.641793	0.630616	0.878725	0.902499	0.885989	0.615141	0.680447	0.72546	0.516171	0.582743	0.605769	1.31074	1.08277	0.875654	0.646749
[truncated: 167 more columns]

## Sheet: 222 and 210 summary
Protein	Solution	222/210_Hydrated	222/210_Desiccated	Mean_222/210_Hydrated	STD_222/210_Hydrated	Mean_222/210_Desiccated	STD_222/210_Desiccated
AtLEA4-2	0	0.56348	0.988272	0.576292	0.0198861	0.967092	0.0204431
AtLEA4-2	0	0.566195	0.965528
AtLEA4-2	0	0.599201	0.947476
AtLEA4-2	Tre	0.595621	0.957045	0.601231	0.00505395	1.00318	0.040459
AtLEA4-2	Tre	0.602641	1.03261
AtLEA4-2	Tre	0.60543	1.01989
AtLEA4-2	Suc	0.610911	1.28565	0.616511	0.00309223	1.17725	0.0948667
AtLEA4-2	Suc	0.610651	1.10939
AtLEA4-2	Suc	0.627971	1.13672
HeLEA	0	0.478705	0.878725	0.583705	0.0911038	0.889071	0.0121829
HeLEA	0	0.641793	0.902499
HeLEA	0	0.630616	0.885989
HeLEA	Tre	0.516171	1.31074	0.568227	0.0465293	1.08972	0.217626
HeLEA	Tre	0.582743	1.08277
HeLEA	Tre	0.605769	0.875654
HeLEA	Suc	0.488035	1.28425	0.569978	0.0728203	1.06167	0.192781
HeLEA	Suc	0.627283	0.952895
HeLEA	Suc	0.594615	0.947858
AvLEA	0	0.547148	1.09491	0.579921	0.0425317	1.26032	0.187255
AvLEA	0	0.564632	1.22241
AvLEA	0	0.627984	1.46362
AvLEA	Tre	0.584201	1.68823	0.627692	0.0413456	1.78541	0.328399
AvLEA	Tre	0.632384	1.51657
AvLEA	Tre	0.666492	2.15144
AvLEA	Suc	0.608611	1.37596	0.631108	0.0204485	1.46805	0.188562
AvLEA	Suc	0.648566	1.34323
AvLEA	Suc	0.636147	1.68496
AavLEA	0	0.52596	1.01634	0.545569	0.0639549	0.997232	0.0237466
AavLEA	0	0.617033	0.970646
AavLEA	0	0.493715	1.00472
AavLEA	Tre	0.567246	0.958372	0.580524	0.0199016	0.988567	0.0403143
AavLEA	Tre	0.603406	0.972982
AavLEA	Tre	0.570919	1.03435
AavLEA	Suc	0.519058	1.04413	0.535362	0.0428555	1.0213	0.0696014
AavLEA	Suc	0.583976	0.943154
AavLEA	Suc	0.503051	1.07662
AtLEA3-3	0	0.559573	0.852385	0.585678	0.029773	0.863408	0.0165512
AtLEA3-3	0	0.579357	0.855398
AtLEA3-3	0	0.618104	0.88244
AtLEA3-3	Tre	0.580002	1.04473	0.587619	0.0311092	0.979942	0.0620857
AtLEA3-3	Tre	0.561026	0.920963
AtLEA3-3	Tre	0.62183	0.974136
AtLEA3-3	Suc	0.491752	0.93933	0.532423	0.0377944	1.02495	0.22561
AtLEA3-3	Suc	0.539053	1.28084
AtLEA3-3	Suc	0.566463	0.854686
BSA	0	0.936272	0.925902	0.926677	0.0104106	0.933876	0.0282248
BSA	0	0.915608	0.910495
BSA	0	0.928151	0.965229
BSA	Tre	0.930132	0.960809	0.925853	0.0051611	0.937492	0.0205013
BSA	Tre	0.920121	0.929378
BSA	Tre	0.927307	0.92229
BSA	Suc	0.927754	0.969959	0.93269	0.00428466	0.941593	0.028978
BSA	Suc	0.934867	0.912039
BSA	Suc	0.93545	0.942781
CAHS_D	0	0.798832	1.02425	0.805488	0.00643297	1.089	0.0787912
CAHS_D	0	0.811671	1.17673
CAHS_D	0	0.805961	1.06602
CAHS_D	Tre	0.851268	1.20313	0.829147	0.0203403	1.09504	0.0947299
CAHS_D	Tre	0.811252	1.05554
CAHS_D	Tre	0.824921	1.02646
CAHS_D	Suc	0.825472	1.00779	0.816299	0.013846	1.05492	0.0684341
CAHS_D	Suc	0.823052	1.02355
CAHS_D	Suc	0.800372	1.13341
Protein	Buffer	Buffer_err	Trehalose	Trehalose_err	Sucrose	Sucrose_err	dBuffer	dBuffer_err	dTrehalose	dTrehalose_err	dSucrose	dSucrose_err
AtLEA3-3	0.585678	0.029773	0.587619	0.0311092	0.532423	0.0377945	0.863408	0.0165512	0.979942	0.0620857	1.02495	0.22561
AtLEA4-2	0.576292	0.0198861	0.601231	0.00505395	0.616511	0.00992579	0.967092	0.0204431	1.00318	0.040459	1.17725	0.0948667
AvLEA1C	0.579921	0.0425317	0.627692	0.0413456	0.631108	0.0204485	1.26032	0.187255	1.78541	0.3284	1.46805	0.188562
AavLEA1	0.545569	0.0639549	0.580524	0.0199016	0.535362	0.0428555	0.997232	0.0237466	0.988567	0.0403143	1.0213	0.0696014
HeLEA68614	0.583705	0.0911039	0.568227	0.0465293	0.569978	0.0728203	0.889071	0.0121829	1.08972	0.217626	1.06167	0.192781
CAHS D	0.805488	0.00643297	0.829147	0.0203403	0.816299	0.013846	1.089	0.0787912	1.12931	0.103344	1.05492	0.0684341
BSA	0.926677	0.0104106	0.925853	0.0051611	0.93269	0.00428466	0.933876	0.0282248	0.937492	0.0205013	0.941593	0.028978

## Sheet: 3C_R plot
Protein	Condition	Solvent	Ratio	Error
AtLEA3-3	Dehydrated	Buffer	0.863408	0.0165512
AtLEA4-2	Dehydrated	Buffer	0.967092	0.0204431
AvLEA1C	Dehydrated	Buffer	1.26032	0.187255
AavLEA1	Dehydrated	Buffer	0.997232	0.0237466
HeLEA68614	Dehydrated	Buffer	0.889071	0.0121829
CAHS_D	Dehydrated	Buffer	1.089	0.0787912
BSA	Dehydrated	Buffer	0.933876	0.0282248
AtLEA3-3	Dehydrated	Trehalose	0.979942	0.0620857
AtLEA4-2	Dehydrated	Trehalose	1.00318	0.040459
AvLEA1C	Dehydrated	Trehalose	1.78541	0.3284
AavLEA1	Dehydrated	Trehalose	0.988567	0.0403143
HeLEA68614	Dehydrated	Trehalose	1.08972	0.217626
CAHS_D	Dehydrated	Trehalose	1.12931	0.103344
BSA	Dehydrated	Trehalose	0.937492	0.0205013
AtLEA3-3	Dehydrated	Sucrose	1.02495	0.22561
AtLEA4-2	Dehydrated	Sucrose	1.17725	0.0948667
AvLEA1C	Dehydrated	Sucrose	1.46805	0.188562
AavLEA1	Dehydrated	Sucrose	1.0213	0.0696014
HeLEA68614	Dehydrated	Sucrose	1.06167	0.192781
CAHS_D	Dehydrated	Sucrose	1.05492	0.0684341
BSA	Dehydrated	Sucrose	0.941593	0.028978
AtLEA3-3	Hydrated	Buffer	0.585678	0.029773
AtLEA4-2	Hydrated	Buffer	0.576292	0.0198861
AvLEA1C	Hydrated	Buffer	0.579921	0.0425317
AavLEA1	Hydrated	Buffer	0.545569	0.0639549
HeLEA68614	Hydrated	Buffer	0.583705	0.0911039
CAHS_D	Hydrated	Buffer	0.805488	0.00643297
BSA	Hydrated	Buffer	0.926677	0.0104106
AtLEA3-3	Hydrated	Trehalose	0.587619	0.0311092
AtLEA4-2	Hydrated	Trehalose	0.601231	0.00505395
AvLEA1C	Hydrated	Trehalose	0.627692	0.0413456
AavLEA1	Hydrated	Trehalose	0.580524	0.0199016
HeLEA68614	Hydrated	Trehalose	0.568227	0.0465293
CAHS_D	Hydrated	Trehalose	0.829147	0.0203403
BSA	Hydrated	Trehalose	0.925853	0.0051611
AtLEA3-3	Hydrated	Sucrose	0.532423	0.0377945
AtLEA4-2	Hydrated	Sucrose	0.616511	0.00992579
AvLEA1C	Hydrated	Sucrose	0.631108	0.0204485
AavLEA1	Hydrated	Sucrose	0.535362	0.0428555
HeLEA68614	Hydrated	Sucrose	0.569978	0.0728203
CAHS_D	Hydrated	Sucrose	0.816299	0.013846
BSA	Hydrated	Sucrose	0.93269	0.00428466

## Sheet: d 222 210
Protein	Solution	Hydrated_a	Hydrated_b	Hydrated_c	d_hydrated_a	d_hydrated_b	d_hydrated_c			Protein	Solution	Desiccated_a	Desiccated_b	Desiccated_c	d_desiccated_a	d_desiccated_a	d_desiccated_a
AtLEA4-2	0	0.56348	0.566195	0.599201						AtLEA4-2	0	0.988272	0.965528	0.947476
AtLEA4-2	Tre	0.595621	0.602641	0.602641	0.0321416	0.0364451	0.00343958			AtLEA4-2	Tre	0.957045	1.03261	1.01989	-0.0312268	0.0670849	0.0724127
AtLEA4-2	Suc	0.610911	0.610651	0.627971	0.047431	0.0444557	0.0287705			AtLEA4-2	Suc	1.28565	1.10939	1.13672	0.297382	0.14386	0.189246
HeLEA	0	0.478705	0.641793	0.630616						HeLEA	0	0.878725	0.902499	0.885989
HeLEA	Tre	0.516171	0.582743	0.605769	0.0374654	-0.0590505	-0.024847			HeLEA	Tre	1.31074	1.08277	0.875654	0.432015	0.180271	-0.0103343
HeLEA	Suc	0.488035	0.627283	0.594615	0.00932923	-0.0145103	-0.0360008			HeLEA	Suc	1.28425	0.952895	0.947858	0.40553	0.050396	0.0618695
AvLEA	0	0.547148	0.564632	0.627984						AvLEA	0	1.09491	1.22241	1.46362
AvLEA	Tre	0.584201	0.632384	0.666492	0.0370527	0.0677519	0.0385075			AvLEA	Tre	1.68823	1.51657	2.15144	0.593318	0.294162	0.687813
AvLEA	Suc	0.608611	0.648566	0.636147	0.061463	0.0839341	0.00816295			AvLEA	Suc	1.37596	1.34323	1.68496	0.281049	0.120813	0.221336
AavLEA	0	0.52596	0.617033	0.493715						AavLEA	0	1.01634	0.970646	1.00472
AavLEA	Tre	0.567246	0.603406	0.570919	0.0412854	-0.0136272	0.0772043			AavLEA	Tre	0.958372	0.972982	1.03435	-0.0579634	0.00233602	0.0296319
AavLEA	Suc	0.519058	0.583976	0.50305	-0.0069019	-0.0330569	0.00933565			AavLEA	Suc	1.04413	0.943154	1.07662	0.0277972	-0.0274915	0.0719068
AtLEA3-3	0	0.559573	0.579357	0.618104						AtLEA3-3	0	0.852385	0.855398	0.88244
AtLEA3-3	Tre	0.580002	0.561026	0.62183	0.0204288	-0.0183306	0.00372556			AtLEA3-3	Tre	1.04473	0.920963	0.974136	0.192341	0.0655647	0.0916958
AtLEA3-3	Suc	0.491752	0.539053	0.566463	-0.0678214	-0.0403038	-0.0516407			AtLEA3-3	Suc	0.93933	1.28084	0.854686	0.0869449	0.42544	-0.0277545
BSA	0	0.936272	0.915608	0.928151						BSA	0	0.925902	0.910495	0.965229
BSA	Tre	0.930132	0.920121	0.927307	-0.0061401	0.00451335	-0.0008446			BSA	Tre	0.960809	0.929378	0.92229	0.0349069	0.0188823	-0.042939
BSA	Suc	0.927754	0.934867	0.93545	-0.0085177	0.0192592	0.00729841			BSA	Suc	0.969959	0.912039	0.942781	0.0440567	0.00154403	-0.0224481
CAHS_D	0	0.798832	0.811671	0.805961						CAHS_D	0	1.02425	1.17673	1.06602
CAHS_D	Tre	0.851268	0.811252	0.824921	0.0524369	-0.0004195	0.01896			CAHS_D	Tre	1.20313	1.05554	1.02646	0.178881	-0.121186	-0.0395645
CAHS_D	Suc	0.825472	0.823052	0.800372	0.0266404	0.0113806	-0.0055889			CAHS_D	Suc	1.00779	1.02355	1.13341	-0.0164615	-0.153178	0.0673876
