# Supplementary material for: Disordered proteins interact with the chemical environment to tune their protective function during drying
Source: eLife. 2024 Nov 19;13:RP97231. doi: 10.7554/eLife.97231 (PMC11575898; doi:10.7554/eLife.97231)
Supplement: Figure 4—figure supplement 1—source data 1. [file elife-97231-fig4-figsupp1-data1.xlsx]

## Sheet: AavLEA1_Tris 4
Q	I(Q)	Error
0.0114	2.60935	6.84345
0.01191	2.57782	6.13128
0.01242	3.73064	4.9228
0.01292	4.8297	2.70934
0.01343	4.8435	2.23897
0.01394	4.89744	1.70451
0.01444	4.82207	1.1709
0.01495	5.06212	1.05248
0.01546	5.09495	0.843903
0.01596	5.12264	0.627389
0.01647	4.84714	0.482897
0.01698	5.00487	0.424785
0.01748	4.92173	0.355264
0.01799	5.09106	0.274631
0.0185	4.8334	0.230754
0.019	4.99583	0.199338
0.01951	4.71793	0.167773
0.02002	4.75399	0.145797
0.02052	4.72374	0.1195
0.02103	4.71855	0.108256
0.02154	4.68735	0.0855051
0.02204	4.50034	0.0771042
0.02255	4.45659	0.0702682
0.02306	4.46171	0.0618493
0.02356	4.39129	0.0572296
0.02407	4.30369	0.0522345
0.02458	4.28573	0.0492677
0.02509	4.20077	0.0456898
0.02559	4.14844	0.0421794
0.0261	4.07331	0.0399972
0.02661	4.07229	0.0380985
0.02711	3.99369	0.0356451
0.02762	3.90329	0.0344954
0.02813	3.82731	0.0336073
0.02863	3.78145	0.0320173
0.02914	3.72401	0.0321285
0.02965	3.69958	0.0315662
0.03015	3.59393	0.0304152
0.03066	3.6123	0.030438
0.03117	3.49909	0.0293248
0.03167	3.42822	0.0292282
0.03218	3.39423	0.0292516
0.03269	3.33527	0.0284697
0.03319	3.30049	0.0283556
0.0337	3.24134	0.0272829
0.03421	3.19332	0.0274662
0.03471	3.11128	0.0272113
0.03522	3.04558	0.02682
0.03573	2.98222	0.0261858
0.03623	2.96022	0.0259373
0.03674	2.9057	0.025677
0.03725	2.82237	0.0253392
0.03775	2.79079	0.0250197
0.03826	2.75068	0.0246805
0.03877	2.68125	0.0240492
0.03927	2.60679	0.0238405
0.03978	2.57451	0.0233697
0.04029	2.56945	0.023525
0.0408	2.48558	0.0230876
0.0413	2.45121	0.0228657
0.04181	2.38472	0.0227845
0.04232	2.35248	0.0224574
0.04282	2.3105	0.0221549
0.04333	2.26059	0.0217838
0.04384	2.22919	0.0218226
0.04434	2.15276	0.0215845
0.04485	2.13734	0.0211711
0.04536	2.11226	0.0210995
0.04586	2.03319	0.0205239
0.04637	2.00639	0.0208465
0.04688	1.95353	0.020528
0.04738	1.95162	0.0203185
0.04789	1.90914	0.0200854
0.0484	1.86759	0.019721
0.0489	1.81861	0.01983
0.04941	1.77936	0.0199106
0.04992	1.7446	0.0190831
0.05042	1.71798	0.0188437
0.05093	1.65894	0.0188247
0.05144	1.64717	0.0186503
0.05194	1.62933	0.0182826
0.05245	1.56655	0.0182807
0.05296	1.54286	0.0179236
0.05346	1.52824	0.0178827
0.05397	1.4942	0.0178602
0.05448	1.46802	0.017612
0.05498	1.44195	0.0176318
0.05549	1.40513	0.0171902
0.056	1.37588	0.0173845
0.0565	1.34789	0.0172696
0.05701	1.32041	0.0168111
0.05752	1.29103	0.0169139
0.05803	1.28434	0.0166346
0.05853	1.23219	0.0166149
0.05904	1.23093	0.0166295
0.05955	1.19514	0.0164176
0.06005	1.19634	0.0160214
0.06056	1.15746	0.0161667
0.06107	1.11969	0.016195
0.06157	1.09468	0.0159243
0.06208	1.08982	0.0158838
0.06259	1.0767	0.0155615
0.06309	1.04575	0.0156214
0.0636	1.044	0.0155416
0.06411	1.00236	0.0153583
0.06461	0.976494	0.0153315
0.06512	0.975104	0.0151585
0.06563	0.982496	0.0150459
0.06613	0.949627	0.0150112
0.06664	0.917026	0.0149188
0.06715	0.88132	0.0148364
0.06765	0.880696	0.0146066
0.06816	0.88068	0.014702
0.06867	0.845817	0.0144961
0.06917	0.830859	0.014424
0.06968	0.814206	0.0144051
0.07019	0.820587	0.014141
0.07069	0.797129	0.0141199
0.0712	0.776367	0.0142062
0.07171	0.757602	0.014001
0.07221	0.776061	0.0139232
0.07272	0.752939	0.0137579
0.07323	0.724601	0.0138869
0.07373	0.718742	0.0135987
0.07424	0.692293	0.0135053
0.07475	0.697655	0.0134843
0.07526	0.703381	0.0134717
0.07576	0.68225	0.0133565
0.07627	0.677338	0.0133521
0.07678	0.649728	0.0132491
0.07728	0.639796	0.0128902
0.07779	0.642633	0.0129508
0.0783	0.619907	0.0128887
0.0788	0.607898	0.0128598
0.07931	0.608812	0.0127396
0.07982	0.600444	0.0125621
0.08032	0.580203	0.0128229
0.08083	0.584094	0.0129116
0.08134	0.568792	0.012869
0.08184	0.566084	0.0130309
0.08235	0.552667	0.0128226
0.08286	0.557177	0.0128877
0.08336	0.550979	0.0130223
0.08387	0.52909	0.0129664
0.08438	0.525211	0.0128264
0.08488	0.528279	0.0128007
0.08539	0.508592	0.012856
0.0859	0.500467	0.0128401
0.0864	0.49256	0.0128979
0.08691	0.496005	0.0127536
0.08742	0.501133	0.0127736
0.08792	0.483197	0.0126508
0.08843	0.460703	0.0127122
0.08894	0.455944	0.0127493
0.08944	0.452184	0.0126534
0.08995	0.440896	0.0128551
0.09046	0.451253	0.0130387
0.09096	0.446784	0.0130179
0.09147	0.435792	0.0130677
0.09198	0.421628	0.0129315
0.09248	0.429942	0.0127402
0.09299	0.415503	0.0127547
0.0935	0.422149	0.0125255
0.09401	0.412819	0.0125393
0.09451	0.411909	0.0124547
0.09502	0.405785	0.0123975
0.09553	0.401949	0.0124035
0.09603	0.392043	0.0123133
0.09654	0.408882	0.0122347
0.09705	0.387789	0.0122734
0.09755	0.378358	0.0122629
0.09806	0.37688	0.0121752
0.09857	0.369177	0.243589
0.09907	0.355097	0.0120702
0.09958	0.364354	0.0120607
0.10009	0.368358	0.0120063
0.10059	0.346556	0.0119857
0.1011	0.352668	0.0118218
0.10161	0.363626	0.0115692
0.10211	0.348176	0.0114493
0.10262	0.344774	0.0113973
0.10313	0.347799	0.0114374
0.10363	0.335036	0.0116261
0.10414	0.331157	0.0115629
0.10465	0.324226	0.0116385
0.10515	0.329722	0.0117233
0.10566	0.352341	0.0115558
0.10617	0.319473	0.0113199
0.10667	0.326099	0.011202
0.10718	0.320301	0.0112028
0.10769	0.319357	0.0110725
0.10819	0.327377	0.0110052
0.1087	0.320629	0.010928
0.10921	0.310491	0.0107486
0.10971	0.310064	0.010839
0.11022	0.287896	0.0107238
0.11073	0.3034	0.0106715
0.11123	0.299235	0.0106266
0.11174	0.305525	0.0106053
0.11225	0.305358	0.0105537
0.11275	0.308884	0.0105593
0.11326	0.285016	0.010449
0.11377	0.289794	0.0102934
0.11428	0.289371	0.0103612
0.11478	0.299821	0.0103008
0.11529	0.282772	0.0102028
0.1158	0.285338	0.0102057
0.1163	0.288504	0.0100396
0.11681	0.292909	0.0100787
0.11732	0.271751	0.0100318
0.11782	0.284918	0.0100282
0.11833	0.280272	0.00991802
0.11884	0.289462	0.00987863
0.11934	0.28062	0.0098329
0.11985	0.272657	0.0098121
0.12036	0.270161	0.00977353
0.12086	0.276034	0.00967852
0.12137	0.2678	0.00969666
0.12188	0.264105	0.00966336
0.12238	0.261138	0.00957225
0.12289	0.259488	0.00956354
0.1234	0.258092	0.00950956
0.1239	0.252571	0.00952472
0.12441	0.251145	0.00945343
0.12492	0.266358	0.00940055
0.12542	0.252405	0.00936349
0.12593	0.254547	0.00929497
0.12644	0.261891	0.00930917
0.12694	0.251677	0.00934895
0.12745	0.263254	0.00922044
0.12796	0.251223	0.00912786
0.12846	0.253016	0.00909664
0.12897	0.245669	0.00910399
0.12948	0.241944	0.00908916
0.12998	0.246756	0.00906685
0.13049	0.248383	0.00896287
0.131	0.248333	0.00892207
0.1315	0.233492	0.0089161
0.13201	0.245422	0.00877013
0.13252	0.239177	0.00885673
0.13302	0.246741	0.00879138
0.13353	0.240357	0.00872722
0.13404	0.240379	0.00879066
0.13454	0.236544	0.00872822
0.13505	0.237419	0.00873626
0.13556	0.237773	0.00864446
0.13606	0.229814	0.0086904
0.13657	0.230338	0.00867484
0.13708	0.234362	0.00862203
0.13758	0.235608	0.0085717
0.13809	0.222329	0.008593
0.1386	0.229916	0.00853057
0.13911	0.232386	0.00845359
0.13961	0.226513	0.00843661
0.14012	0.221377	0.00840747
0.14063	0.229745	0.0083838
0.14113	0.228147	0.00845237
0.14164	0.21678	0.00840146
0.14215	0.22075	0.00834766
0.14265	0.216207	0.00829849
0.14316	0.215328	0.008317
0.14367	0.220933	0.00831993
0.14417	0.216774	0.00825941
0.14468	0.202784	0.00824327
0.14519	0.221341	0.00821548
0.14569	0.212875	0.00815979
0.1462	0.208988	0.00819165
0.14671	0.214852	0.0082317
0.14721	0.212726	0.00815586
0.14772	0.203766	0.0081147
0.14823	0.202227	0.00813472
0.14873	0.200524	0.00808451
0.14924	0.211383	0.00806989
0.14975	0.196989	0.00809152
0.15025	0.205474	0.00806107
0.15076	0.21198	0.00802885
0.15127	0.202588	0.00804084
0.15177	0.194135	0.00797878
0.15228	0.203332	0.00796739
0.15279	0.202737	0.00795622
0.15329	0.203173	0.00795171
0.1538	0.202107	0.00796997
0.15431	0.197827	0.00785531
0.15481	0.195824	0.0078464
0.15532	0.196186	0.00789343
0.15583	0.193	0.00776165
0.15633	0.200181	0.0077909
0.15684	0.20506	0.007744
0.15735	0.186156	0.00768478
0.15785	0.201745	0.00771426
0.15836	0.195565	0.00773886
0.15887	0.192342	0.00768815
0.15937	0.181246	0.00767956
0.15988	0.183557	0.00763984
0.16039	0.198969	0.00766784
0.16089	0.188832	0.00768612
0.1614	0.179408	0.00760185
0.16191	0.183083	0.00759346
0.16241	0.182366	0.00761548
0.16292	0.19043	0.00757472
0.16343	0.177589	0.00757427
0.16393	0.188198	0.00757232
0.16444	0.181226	0.00750468
0.16495	0.177382	0.00753632
0.16545	0.177364	0.00751759
0.16596	0.175351	0.0074936
0.16647	0.176328	0.00750012
0.16697	0.184369	0.00740727
0.16748	0.184789	0.00744003
0.16799	0.178263	0.00744699
0.16849	0.175426	0.00735977
0.169	0.176242	0.00741462
0.16951	0.168114	0.00746482
0.17001	0.16234	0.00747569
0.17052	0.169799	0.0075454
0.17103	0.177517	0.00761854
0.17153	0.173086	0.00751088
0.17204	0.162798	0.00754706
0.17255	0.172969	0.00760547
0.17305	0.166464	0.00761557
0.17356	0.166377	0.00762047
0.17407	0.173262	0.00756489
0.17457	0.162908	0.00762432
0.17508	0.16647	0.00761732
0.17559	0.166812	0.00758365
0.1761	0.161236	0.0076649
0.1766	0.170003	0.00757661
0.17711	0.169852	0.00760515
0.17762	0.153417	0.0076105
0.17812	0.156861	0.00764314
0.17863	0.162749	0.0075863
0.17914	0.16864	0.00756241
0.17964	0.154477	0.00758009
0.18015	0.153246	0.00765962
0.18066	0.156498	0.00773639
0.18116	0.161541	0.00774187
0.18167	0.15343	0.00778195
0.18218	0.152527	0.00773184
0.18268	0.156174	0.00778103
0.18319	0.147969	0.00779431
0.1837	0.152362	0.00781922
0.1842	0.14132	0.007869
0.18471	0.155705	0.00791528
0.18522	0.152427	0.00791905
0.18572	0.157297	0.00793571
0.18623	0.156419	0.00790369
0.18674	0.154371	0.00794526
0.18724	0.142423	0.00801162
0.18775	0.148771	0.00800153
0.18826	0.141882	0.00803321
0.18876	0.146989	0.00802058
0.18927	0.14449	0.0080118
0.18978	0.139674	0.00806081
0.19028	0.145632	0.00806618
0.19079	0.148304	0.00805091
0.1913	0.148928	0.00807929
0.1918	0.135398	0.00811788
0.19231	0.140219	0.00808432
0.19282	0.135119	0.00810294
0.19332	0.148032	0.00814279
0.19383	0.140915	0.00810218
0.19434	0.128825	0.00817516
0.19484	0.135744	0.0081779
0.19535	0.134321	0.00814721
0.19586	0.131436	0.00820139
0.19636	0.139265	0.00815263
0.19687	0.148199	0.00821074
0.19738	0.132609	0.00825382
0.19788	0.139796	0.0081427
0.19839	0.129848	0.00821598
0.1989	0.143007	0.0081804
0.1994	0.1339	0.00821738
0.19991	0.142026	0.00822055
0.20042	0.139764	0.00823998
0.20092	0.124065	0.00823578
0.20143	0.131297	0.00822871
0.20194	0.136159	0.00825745
0.20244	0.139005	0.00826451
0.20295	0.129341	0.00828176
0.20346	0.115697	0.00827239
0.20396	0.139295	0.00826373
0.20447	0.122439	0.00834177
0.20498	0.120081	0.00829562
0.20548	0.125533	0.00823567
0.20599	0.122799	0.00829498
0.2065	0.111247	0.00827661
0.207	0.128817	0.00825686
0.20751	0.129295	0.00820365
0.20802	0.128219	0.00818804
0.20852	0.123185	0.00814602
0.20903	0.123767	0.00818669
0.20954	0.121674	0.00823389
0.21004	0.123713	0.00820362
0.21055	0.120289	0.00822752
0.21106	0.121022	0.00822958
0.21156	0.111171	0.00826059
0.21207	0.11366	0.00817034
0.21258	0.119619	0.00817008
0.21308	0.136469	0.00820645
0.21359	0.124897	0.00819342
0.2141	0.113603	0.00820578
0.2146	0.115799	0.00815232
0.21511	0.117781	0.00816869
0.21562	0.116958	0.00817932
0.21612	0.119464	0.00814283
0.21663	0.108235	0.00817626
0.21714	0.113244	0.00811627
0.21764	0.11872	0.00808223
0.21815	0.119433	0.00812005
0.21866	0.124367	0.00812579
0.21916	0.107261	0.00812176
0.21967	0.107827	0.0081005
0.22018	0.113938	0.00801913
0.22068	0.108029	0.00807567
0.22119	0.111453	0.00801997
0.2217	0.107981	0.00805208
0.2222	0.111478	0.00801328
0.22271	0.108959	0.00799815
0.22322	0.0989544	0.00799702
0.22372	0.109508	0.00796434
0.22423	0.102032	0.00792306
0.22474	0.104243	0.00790503
0.22524	0.103311	0.00788235
0.22575	0.0863497	0.00790132
0.22626	0.0957911	0.00788045
0.22676	0.100587	0.00783397
0.22727	0.104801	0.0077746
0.22778	0.100018	0.00783013
0.22828	0.104467	0.00776277
0.22879	0.101596	0.00776562
0.2293	0.0974025	0.00771928
0.2298	0.0951472	0.00773905
0.23031	0.100206	0.00768239
0.23082	0.102503	0.00769326
0.23132	0.0941414	0.00765658
0.23183	0.0970767	0.00762597
0.23234	0.102513	0.00758893
0.23284	0.0941031	0.00755018
0.23335	0.100136	0.00751916
0.23386	0.101755	0.00746497
0.23436	0.0911583	0.00748834
0.23487	0.0995153	0.00746561
0.23538	0.0908344	0.00743005
0.23588	0.0905117	0.00744411
0.23639	0.0947536	0.00745173
0.2369	0.0979197	0.00738959
0.2374	0.0945933	0.0074061
0.23791	0.0984136	0.0073996
0.23842	0.0968772	0.00741174
0.23892	0.0873714	0.00734379
0.23943	0.0937258	0.00732656
0.23994	0.0914119	0.00736902
0.24044	0.0886194	0.00731261
0.24095	0.0923914	0.00730998
0.24145	0.095125	0.00729911
0.24196	0.085815	0.00722269
0.24247	0.0865606	0.00726958
0.24297	0.0951706	0.00723377
0.24348	0.0893558	0.00727024
0.24399	0.0885711	0.00718475
0.24449	0.0949506	0.00720847
0.245	0.0872967	0.00717434
0.24551	0.0902303	0.00716707
0.24601	0.0977406	0.00714616
0.24652	0.0960831	0.00717666
0.24703	0.0842906	0.0071614
0.24753	0.0869069	0.00712415
0.24804	0.0911225	0.007118
0.24855	0.0932386	0.00709816
0.24905	0.0930883	0.00707125
0.24956	0.0936442	0.00707359
0.25007	0.0903014	0.00705967
0.25057	0.0784564	0.00705091
0.25108	0.083655	0.00700334
0.25159	0.0762422	0.00702174
0.25209	0.0901128	0.00702189
0.2526	0.0828486	0.00697399
0.25311	0.0843392	0.00694731
0.25361	0.084535	0.00694155
0.25412	0.0792581	0.00694532
0.25463	0.0834692	0.00693513
0.25513	0.0810775	0.00694502
0.25564	0.0922603	0.00693931
0.25615	0.0848181	0.00685694
0.25665	0.0838856	0.00691139
0.25716	0.0766756	0.0068621
0.25767	0.073685	0.00682883
0.25817	0.0791053	0.00678505
0.25868	0.0757211	0.00676921
0.25919	0.0748692	0.00676531
0.25969	0.0791694	0.00673455
0.2602	0.0766197	0.00673568
0.26071	0.0762039	0.00673343
0.26121	0.0759939	0.00674333
0.26172	0.0749539	0.00672559
0.26223	0.0799981	0.00670831
0.26273	0.0788506	0.00670932
0.26324	0.0731644	0.00668188
0.26375	0.0736517	0.00667068
0.26425	0.0798881	0.0066852
0.26476	0.0783697	0.00669347
0.26527	0.0782478	0.00664001
0.26577	0.0634611	0.00661227
0.26628	0.0744889	0.00664908
0.26679	0.074115	0.0066345
0.26729	0.0782317	0.00660597
0.2678	0.0779336	0.00662833
0.26831	0.0771661	0.00656859
0.26881	0.0750519	0.00657955
0.26932	0.0748975	0.00656345
0.26983	0.0816681	0.00656452
0.27033	0.0764881	0.0065615
0.27084	0.0707275	0.00653047
0.27134	0.0737311	0.0065398
0.27185	0.0743353	0.00653041
0.27236	0.0642978	0.00648604
0.27286	0.0676986	0.0064882
0.27337	0.0732875	0.00652811
0.27388	0.0707325	0.00646658
0.27438	0.0729317	0.00649471
0.27489	0.0781772	0.00645629
0.2754	0.069325	0.00643341
0.2759	0.0762208	0.0064412
0.27641	0.0701753	0.00643241
0.27692	0.0678811	0.00642637
0.27742	0.0675486	0.00639529
0.27793	0.0684097	0.00642025
0.27844	0.0720897	0.00644324
0.27894	0.0721308	0.00642277
0.27945	0.0707639	0.00640475
0.27996	0.0737503	0.00643506
0.28046	0.0714867	0.00638314
0.28097	0.0621747	0.00635942
0.28148	0.0673292	0.00639549
0.28198	0.0663356	0.00639221
0.28249	0.0639856	0.00640406
0.283	0.0590842	0.00635902
0.2835	0.0626922	0.00635487
0.28401	0.06124	0.00633775
0.28452	0.0661767	0.00626592
0.28502	0.0651589	0.00630599
0.28553	0.065615	0.00630287
0.28604	0.0669761	0.00632124
0.28654	0.0671217	0.00631635
0.28705	0.0631336	0.00631999
0.28756	0.0535433	0.00633838
0.28806	0.0677717	0.00630785
0.28857	0.0680103	0.00633549
0.28908	0.05945	0.00632259
0.28958	0.0625031	0.00632606
0.29009	0.0671097	0.00631219
0.29059	0.0580703	0.00637102
0.2911	0.0648044	0.00636115
0.29161	0.0600369	0.00631575
0.29211	0.0690225	0.00633649
0.29262	0.0596636	0.00636194
0.29313	0.0571881	0.00637122
0.29363	0.0671017	0.0063634
0.29414	0.0621364	0.00634816
0.29465	0.0629506	0.00635806
0.29515	0.0634189	0.00633665
0.29566	0.0606114	0.00632771
0.29617	0.0648308	0.00635278
0.29667	0.0635908	0.00631954
0.29718	0.0651803	0.00632269
0.29769	0.0633178	0.00636464
0.29819	0.0544069	0.00635331
0.2987	0.06105	0.00629459
0.29921	0.0554403	0.00633643
0.29971	0.0550022	0.00630673
0.30022	0.0630836	0.00633329
0.30073	0.0606244	0.00628217
0.30123	0.0589708	0.00628917
0.30174	0.0494797	0.00632086
0.30225	0.0582286	0.0062904
0.30275	0.0612156	0.00626786
0.30326	0.0625833	0.00629186
0.30377	0.0580775	0.00624068
0.30427	0.0589444	0.00623476
0.30478	0.0549636	0.00622729
0.30529	0.0569361	0.0062282
0.30579	0.0628397	0.00622014
0.3063	0.0613831	0.00619632
0.3068	0.0564508	0.00616973
0.30731	0.0551619	0.0061942
0.30782	0.0599183	0.00616976
0.30832	0.0537592	0.00615823
0.30883	0.0566456	0.00615598
0.30934	0.0622458	0.00615944
0.30984	0.0640617	0.00624747
0.31035	0.0460567	0.00629858
0.31086	0.0550814	0.00637644
0.31136	0.05142	0.00643171
0.31187	0.0498697	0.0064383
0.31238	0.0519244	0.00649345
0.31288	0.0600169	0.00650662
0.31339	0.0465511	0.00651673
0.3139	0.0523806	0.00654431
0.3144	0.0491908	0.00660919
0.31491	0.0567753	0.0066204
0.31542	0.0673003	0.00662881
0.31592	0.056115	0.00664068
0.31643	0.0636906	0.00667016
0.31694	0.0558064	0.00670278
0.31744	0.0534211	0.00670451
0.31795	0.0577722	0.00675604
0.31845	0.0567594	0.00672365
0.31896	0.0565014	0.00674972
0.31947	0.0506511	0.00677998
0.31997	0.0540286	0.00673616
0.32048	0.0476056	0.00677321
0.32099	0.0618219	0.00676131
0.32149	0.0513158	0.00676482
0.322	0.0516525	0.00674764
0.32251	0.0509964	0.00677189
0.32301	0.0485281	0.00675828
0.32352	0.0468903	0.00674427
0.32403	0.0505333	0.00677125
0.32453	0.0509206	0.00673756
0.32504	0.0410206	0.00677634
0.32555	0.0545375	0.00675059
0.32605	0.0536756	0.00676938
0.32656	0.0489117	0.00675253
0.32707	0.0431928	0.00676969
0.32757	0.0543647	0.00678875
0.32808	0.0519192	0.00677246
0.32859	0.0551625	0.00678659
0.32909	0.0526256	0.006797
0.3296	0.0473264	0.00681025
0.3301	0.0485375	0.00683152
0.33061	0.0418714	0.00681897
0.33112	0.0460939	0.00684243
0.33162	0.0493247	0.00683814
0.33213	0.0495269	0.00686317
0.33264	0.0496369	0.00686524
0.33314	0.0476453	0.0068865
0.33365	0.0504733	0.00686151
0.33416	0.0477403	0.00689042
0.33466	0.0492733	0.00690182
0.33517	0.0502956	0.00687542
0.33568	0.0516803	0.0069229
0.33618	0.0567619	0.00688949
0.33669	0.0460056	0.00691322
0.3372	0.0508161	0.00691427
0.3377	0.0460517	0.00692026
0.33821	0.0523306	0.00692603
0.33872	0.0509222	0.00691957
0.33922	0.0542675	0.00693588
0.33973	0.0550917	0.00695689
0.34023	0.0550269	0.00693896
0.34074	0.0454664	0.00696244
0.34125	0.0460547	0.00698889
0.34175	0.043905	0.00699206
0.34226	0.0479353	0.00699192
0.34277	0.0519422	0.00699178
0.34327	0.0467897	0.00696044
0.34378	0.0481506	0.00698657
0.34429	0.0513444	0.00696634
0.34479	0.0445594	0.00700652
0.3453	0.0492511	0.00699476
0.34581	0.0428731	0.00699437
0.34631	0.0452747	0.00703162
0.34682	0.0467828	0.0069968
0.34733	0.0439283	0.00700963
0.34783	0.0413736	0.00703805
0.34834	0.0500236	0.00703967
0.34884	0.0421764	0.0070835
0.34935	0.0571631	0.00703685
0.34986	0.0502275	0.00708233
0.35036	0.0462281	0.00708568
0.35087	0.0389614	0.00705176
0.35138	0.0408764	0.00705533
0.35188	0.0432972	0.00704539
0.35239	0.0504519	0.00706292
0.3529	0.0436844	0.0070384
0.3534	0.0425933	0.00701135
0.35391	0.0367358	0.00687383
0.35442	0.0458617	0.00683639
0.35492	0.0407867	0.00678144
0.35543	0.0413706	0.00679659
0.35594	0.0417372	0.00669317
0.35644	0.0450483	0.00663075
0.35695	0.0457375	0.00662721
0.35745	0.0464647	0.00666723
0.35796	0.0459636	0.00674597
0.35847	0.0490258	0.00678995
0.35897	0.0451642	0.00676041
0.35948	0.0409303	0.00678386
0.35999	0.0451347	0.00674343
0.36049	0.0492419	0.00678437
0.361	0.0427992	0.00680987
0.36151	0.0406617	0.00679722
0.36201	0.0394667	0.00679445
0.36252	0.0404608	0.00684172
0.36303	0.0431633	0.00680371
0.36353	0.0548239	0.00685218
0.36404	0.0488294	0.00686646
0.36455	0.0369439	0.00687687
0.36505	0.0485033	0.00690334
0.36556	0.0410958	0.00690531
0.36606	0.0339428	0.0069459
0.36657	0.0427097	0.00691407
0.36708	0.0489797	0.00696277
0.36758	0.0273503	0.00698638
0.36809	0.0399569	0.00703365
0.3686	0.0341489	0.00712479
0.3691	0.0309922	0.00718039
0.36961	0.0408672	0.00718986
0.37012	0.0507044	0.00723844
0.37062	0.0401036	0.00723278
0.37113	0.0366556	0.00730495
0.37164	0.0292375	0.00727981
0.37214	0.0415039	0.007243
0.37265	0.0466894	0.00727211
0.37315	0.0368953	0.00730789
0.37366	0.0445222	0.00729642
0.37417	0.0357178	0.00732731
0.37467	0.0400503	0.00737204
0.37518	0.0423781	0.00743156
0.37569	0.0418283	0.00743042
0.37619	0.0385272	0.0074718
0.3767	0.0431272	0.00749659
0.37721	0.0393422	0.00748707
0.37771	0.0425306	0.00755022
0.37822	0.0436364	0.00760329
0.37873	0.0502878	0.00765086
0.37923	0.0315383	0.00764953
0.37974	0.0302425	0.00768048
0.38024	0.0408414	0.00772729
0.38075	0.0373369	0.00776506
0.38126	0.0381608	0.00778576
0.38176	0.0328261	0.00781308
0.38227	0.0411692	0.00791026
0.38278	0.0243397	0.00789167
0.38328	0.0451636	0.00792977
0.38379	0.0405592	0.00795047
0.3843	0.0430011	0.00799826
0.3848	0.0309294	0.00801928
0.38531	0.0344611	0.00805764
0.38582	0.0429311	0.00811124
0.38632	0.04558	0.00812642
0.38683	0.0323236	0.00814323
0.38733	0.0411664	0.00815912
0.38784	0.0449703	0.00822808
0.38835	0.0420689	0.00825051
0.38885	0.0441847	0.00826897
0.38936	0.0332572	0.00830996
0.38987	0.0347728	0.00836118
0.39037	0.0418458	0.00844123
0.39088	0.0360264	0.00836807
0.39139	0.0502625	0.00853349
0.39189	0.0305956	0.00852862
0.3924	0.0405133	0.00854932
0.3929	0.0372131	0.00859722
0.39341	0.0382611	0.00864973
0.39392	0.0451117	0.0086472
0.39442	0.0377578	0.00946904
0.39493	0.0376189	0.00871661
0.39544	0.0417919	0.00883612
0.39594	0.03728	0.00881159
0.39645	0.0415867	0.00888587
0.39696	0.0498506	0.00890105
0.39746	0.0400947	0.00895219
0.39797	0.0378361	0.00894278
0.39847	0.0392428	0.00913733
0.39898	0.0360489	0.00908979
0.39949	0.0443767	0.00908247
0.39999	0.0356908	0.00910213
0.4005	0.0378869	0.00923639
0.40101	0.0315908	0.00919142
0.40151	0.0371503	0.00924308
0.40202	0.0369853	0.00934654
0.40253	0.0294514	0.00927334
0.40303	0.0327883	0.0092827
0.40354	0.0505322	0.0093318
0.40405	0.0301158	0.00942408
0.40455	0.0384992	0.00941583
0.40506	0.0388186	0.00943263
0.40556	0.0311025	0.00947909
0.40607	0.0432411	0.00951549
0.40658	0.0386717	0.00947798
0.40708	0.0319419	0.00958607
0.40759	0.0276183	0.00964351
0.4081	0.0236306	0.00959755
0.4086	0.0185992	0.00961963
0.40911	0.0307442	0.00959549
0.40962	0.0277333	0.00971129
0.41012	0.0411556	0.00964511
0.41063	0.043545	0.0097208
0.41113	0.0343131	0.00975636
0.41164	0.0355208	0.00967648
0.41215	0.0343772	0.00970288
0.41265	0.0413086	0.00980675
0.41316	0.0225958	0.00976178
0.41367	0.0328225	0.00976435
0.41417	0.0253239	0.00980167
0.41468	0.0252836	0.00990194
0.41518	0.0375369	0.00977691
0.41569	0.0323569	0.00983475
0.4162	0.0370517	0.00988336
0.4167	0.0270025	0.0100488
0.41721	0.0313497	0.00999381
0.41772	0.0254633	0.0100745
0.41822	0.0341628	0.0100215
0.41873	0.0285911	0.0100349
0.41924	0.0298475	0.0100729
0.41974	0.0300067	0.0102329
0.42025	0.0374911	0.0103048
0.42075	0.0283331	0.0102718
0.42126	0.0438678	0.0102787
0.42177	0.0442292	0.0104441
0.42227	0.0303111	0.0104995
0.42278	0.0357853	0.0105268
0.42329	0.0367472	0.0105603
0.42379	0.0397061	0.0107134
0.4243	0.0324603	0.0106806
0.42481	0.0347392	0.0107984
0.42531	0.0407942	0.0108953
0.42582	0.0283772	0.011009
0.42632	0.0317289	0.0109801
0.42683	0.0275114	0.0110688
0.42734	0.0271053	0.011234
0.42784	0.0378742	0.0111867
0.42835	0.0394378	0.0113126
0.42886	0.0257353	0.011444
0.42936	0.0401586	0.0116159
0.42987	0.0432064	0.0114762
0.43037	0.0247314	0.0116281
0.43088	0.0315078	0.0117098
0.43139	0.0423808	0.0118486
0.43189	0.0200522	0.0118353
0.4324	0.0286247	0.0120343
0.43291	0.0221372	0.0122759
0.43341	0.0304217	0.0121383
0.43392	0.0427619	0.0122327
0.43443	0.0249133	0.0124843
0.43493	0.0342181	0.0126013
0.43544	0.0392336	0.0124681
0.43594	0.04211	0.0127842
0.43645	0.0415831	0.0127939
0.43696	0.0319983	0.0128928
0.43746	0.0179967	0.0129688
0.43797	0.0484133	0.0130662
0.43848	0.0437806	0.0132763
0.43898	0.0232344	0.0132513
0.43949	0.0288942	0.0134642
0.43999	0.0300492	0.0135782

## Sheet: AavLEA1_Tris Fit_4
#q**2_data	ln(I(q))_data	error_data	q**2_fit	ln(I(q))_fit	normalized_residual
0.00012996	0.959101	2.62266	0.000271261	1.62904	-0.508381
0.000141848	0.946946	2.37847	0.00028832	1.61998	-0.112691
0.000154256	1.31658	1.31956	0.00030555	1.61083	-0.237819
0.000166926	1.57478	0.560975	0.00032364	1.60122	0.486929
0.000180365	1.57764	0.462262	0.00034225	1.59134	-0.330674
0.000194324	1.58871	0.348042	0.000361	1.58138	0.682249
0.000208514	1.5732	0.242822	0.00038064	1.57095	-0.550628
0.000223502	1.62179	0.207913	0.0004008	1.56024	-0.0410764
0.000239012	1.62825	0.165635	0.00042107	1.54948	0.123372
0.000254722	1.63367	0.122474	0.000442261	1.53823	0.578523
0.000271261	1.57839	0.0996253	0.000463972	1.5267	0.99601
0.00028832	1.61041	0.0848743	0.000485762	1.51513	-0.640549
0.00030555	1.59366	0.0721828	0.000508503	1.50305	-0.549637
0.00032364	1.62749	0.0539437	0.000531764	1.4907	0.348708
0.00034225	1.57555	0.0477415	0.000555074	1.47832	0.100015
0.000361	1.6086	0.0399009	0.000579365	1.46542	-0.490012
0.00038064	1.55137	0.0355607	0.000604176	1.45224	0.26495
0.0004008	1.55899	0.0306684	0.000629508	1.43879	-0.323972
0.00042107	1.5526	0.0252977	0.000654848	1.42534	-0.256054
0.000442261	1.5515	0.0229427	0.00068121	1.41134	-0.700662
0.000463972	1.54487	0.0182417	0.000708092	1.39706	0.763787
0.000485762	1.50415	0.017133	0.000734952	1.3828	0.214953
0.000508503	1.49438	0.0157672
0.000531764	1.49553	0.0138622
0.000555074	1.47962	0.0130325
0.000579365	1.45947	0.0121371
0.000604176	1.45529	0.0114958
0.000629508	1.43527	0.0108765
0.000654848	1.42273	0.0101675
0.00068121	1.40446	0.00981934
0.000708092	1.40421	0.00935554
0.000734952	1.38472	0.00892534
0.000762864	1.36182	0.00883751
0.000791297	1.34216	0.00878092
0.000819677	1.33011	0.00846693

## Sheet: AavLEA1_200T_4
Q	I(Q)	Error
0.0114	2.07383	6.47876
0.01191	2.20188	5.74125
0.01242	2.44873	4.54627
0.01292	2.12451	2.4803
0.01343	2.09723	2.06132
0.01394	2.20121	1.58065
0.01444	2.34086	1.08221
0.01495	2.15186	0.97426
0.01546	2.13472	0.780611
0.01596	2.05417	0.580397
0.01647	2.07149	0.450654
0.01698	1.8787	0.393252
0.01748	1.97707	0.330114
0.01799	1.97501	0.255207
0.0185	1.94296	0.212502
0.019	1.90421	0.185964
0.01951	1.97527	0.158642
0.02002	1.82101	0.135902
0.02052	1.85499	0.112107
0.02103	1.81372	0.101381
0.02154	1.75208	0.080246
0.02204	1.75354	0.071779
0.02255	1.69123	0.0657004
0.02306	1.69797	0.0576352
0.02356	1.67751	0.0525981
0.02407	1.66832	0.0481014
0.02458	1.65318	0.0450581
0.02509	1.67996	0.0419882
0.02559	1.58874	0.0377221
0.0261	1.58873	0.0360331
0.02661	1.5273	0.0343687
0.02711	1.50829	0.0320986
0.02762	1.5266	0.0308038
0.02813	1.43858	0.0300698
0.02863	1.49295	0.0285573
0.02914	1.45997	0.0285894
0.02965	1.44916	0.0281553
0.03015	1.43038	0.0273291
0.03066	1.4003	0.0271215
0.03117	1.37235	0.026307
0.03167	1.35383	0.0261736
0.03218	1.30773	0.0263003
0.03269	1.3188	0.0255607
0.03319	1.26134	0.0254669
0.0337	1.25903	0.0246699
0.03421	1.29058	0.0246238
0.03471	1.20233	0.0242811
0.03522	1.21185	0.0240388
0.03573	1.2296	0.0235494
0.03623	1.15003	0.0232892
0.03674	1.15758	0.0232613
0.03725	1.14425	0.0228253
0.03775	1.12973	0.0225534
0.03826	1.11252	0.0221706
0.03877	1.09453	0.0216877
0.03927	1.08914	0.0216101
0.03978	1.06772	0.0211527
0.04029	1.04006	0.0210857
0.0408	1.02888	0.0208176
0.0413	1.00436	0.0206525
0.04181	0.992837	0.0206194
0.04232	0.976716	0.0202027
0.04282	0.978257	0.0200656
0.04333	0.956443	0.0197306
0.04384	0.924957	0.0198219
0.04434	0.920716	0.0195855
0.04485	0.919773	0.0193296
0.04536	0.890155	0.0192932
0.04586	0.846348	0.0187006
0.04637	0.868222	0.0191371
0.04688	0.877671	0.0187456
0.04738	0.838367	0.0186323
0.04789	0.823473	0.0183494
0.0484	0.790512	0.0180688
0.0489	0.817267	0.0181761
0.04941	0.796608	0.0180973
0.04992	0.783347	0.0175831
0.05042	0.766683	0.0172794
0.05093	0.745696	0.0172806
0.05144	0.740512	0.0171372
0.05194	0.729953	0.016778
0.05245	0.747008	0.0168141
0.05296	0.728624	0.0165173
0.05346	0.690448	0.0165202
0.05397	0.693504	0.0165006
0.05448	0.672891	0.016333
0.05498	0.677078	0.0162665
0.05549	0.669892	0.0159738
0.056	0.644386	0.0160741
0.0565	0.632405	0.0160259
0.05701	0.633355	0.0157481
0.05752	0.628645	0.0157625
0.05803	0.619402	0.0154994
0.05853	0.615403	0.0155049
0.05904	0.597499	0.0155654
0.05955	0.590561	0.0152608
0.06005	0.590753	0.0150727
0.06056	0.565258	0.0151287
0.06107	0.562311	0.0151324
0.06157	0.549737	0.0149499
0.06208	0.542987	0.0147927
0.06259	0.526624	0.0146012
0.06309	0.524529	0.0146408
0.0636	0.516501	0.0145637
0.06411	0.523239	0.0143976
0.06461	0.516732	0.0143211
0.06512	0.499171	0.0142073
0.06563	0.49968	0.014155
0.06613	0.475963	0.0141466
0.06664	0.488789	0.0140409
0.06715	0.484985	0.0139124
0.06765	0.48473	0.0138955
0.06816	0.459187	0.0138877
0.06867	0.464341	0.0136469
0.06917	0.453206	0.0136023
0.06968	0.464074	0.0136166
0.07019	0.442108	0.0133542
0.07069	0.421732	0.0133582
0.0712	0.447712	0.0133631
0.07171	0.437726	0.0132622
0.07221	0.420468	0.0131582
0.07272	0.403957	0.0130178
0.07323	0.420056	0.0131622
0.07373	0.429009	0.0128354
0.07424	0.415774	0.012841
0.07475	0.383793	0.0127189
0.07526	0.389173	0.012689
0.07576	0.385838	0.0126729
0.07627	0.386062	0.0126239
0.07678	0.383989	0.0125626
0.07728	0.386562	0.0122401
0.07779	0.372484	0.0123369
0.0783	0.373251	0.0122666
0.0788	0.360159	0.0122499
0.07931	0.360473	0.0121707
0.07982	0.361933	0.0119997
0.08032	0.345353	0.0122558
0.08083	0.356447	0.0122903
0.08134	0.344494	0.0122499
0.08184	0.344481	0.0123491
0.08235	0.335543	0.0122592
0.08286	0.354509	0.0123352
0.08336	0.321193	0.0123815
0.08387	0.323684	0.0123647
0.08438	0.300795	0.0122293
0.08488	0.325942	0.0122301
0.08539	0.332412	0.0123255
0.0859	0.319464	0.0123164
0.0864	0.317155	0.0122658
0.08691	0.307324	0.0122287
0.08742	0.298692	0.0121938
0.08792	0.31462	0.0121087
0.08843	0.307871	0.0122122
0.08894	0.305658	0.0122823
0.08944	0.293667	0.0120815
0.08995	0.282127	0.0123244
0.09046	0.297536	0.0125388
0.09096	0.283236	0.0124514
0.09147	0.277573	0.0124285
0.09198	0.267224	0.0123976
0.09248	0.28371	0.0122839
0.09299	0.265708	0.0121954
0.0935	0.273825	0.0120208
0.09401	0.270447	0.0119957
0.09451	0.265887	0.0120058
0.09502	0.282212	0.0119001
0.09553	0.258834	0.0118813
0.09603	0.263481	0.0119385
0.09654	0.266243	0.0117647
0.09705	0.260012	0.0118122
0.09755	0.259767	0.011782
0.09806	0.260895	0.011666
0.09857	0.251367	0.355516
0.09907	0.245859	0.0116205
0.09958	0.241033	0.0115804
0.10009	0.260525	0.0115666
0.10059	0.239897	0.0115083
0.1011	0.229785	0.0113989
0.10161	0.225864	0.0111159
0.10211	0.235839	0.0110071
0.10262	0.233826	0.0109712
0.10313	0.232277	0.0110363
0.10363	0.21069	0.0111079
0.10414	0.212489	0.0111507
0.10465	0.224322	0.0112139
0.10515	0.218064	0.0112449
0.10566	0.219601	0.011122
0.10617	0.224724	0.0108734
0.10667	0.210851	0.0108184
0.10718	0.229514	0.0107582
0.10769	0.209323	0.0106507
0.10819	0.211845	0.0105534
0.1087	0.210761	0.010527
0.10921	0.208036	0.0103755
0.10971	0.213728	0.0104741
0.11022	0.193207	0.0103651
0.11073	0.200216	0.0102759
0.11123	0.199202	0.0102249
0.11174	0.198846	0.0102219
0.11225	0.190669	0.0102014
0.11275	0.20415	0.0101486
0.11326	0.197743	0.0100899
0.11377	0.189746	0.00994755
0.11428	0.196971	0.0100359
0.11478	0.200725	0.00991498
0.11529	0.195644	0.00983187
0.1158	0.196879	0.00979042
0.1163	0.187277	0.00974691
0.11681	0.180917	0.00974093
0.11732	0.184262	0.00966029
0.11782	0.178875	0.0096448
0.11833	0.185945	0.00956547
0.11884	0.180325	0.009546
0.11934	0.175306	0.00948466
0.11985	0.181381	0.00947535
0.12036	0.171646	0.00940033
0.12086	0.16667	0.00936761
0.12137	0.173126	0.00938711
0.12188	0.175856	0.00937413
0.12238	0.165876	0.00928001
0.12289	0.168259	0.00923159
0.1234	0.17113	0.00916216
0.1239	0.16576	0.00918695
0.12441	0.162316	0.00917349
0.12492	0.165477	0.00907997
0.12542	0.152973	0.00908073
0.12593	0.160758	0.00901136
0.12644	0.170066	0.00900952
0.12694	0.157737	0.00900722
0.12745	0.165635	0.00892271
0.12796	0.156776	0.00881589
0.12846	0.166219	0.00879773
0.12897	0.16159	0.00877677
0.12948	0.150309	0.00879132
0.12998	0.166161	0.00871454
0.13049	0.146101	0.00864998
0.131	0.144545	0.00860582
0.1315	0.146967	0.00858649
0.13201	0.158893	0.00850656
0.13252	0.15077	0.0085372
0.13302	0.152309	0.00851525
0.13353	0.157818	0.00846926
0.13404	0.143288	0.00849609
0.13454	0.145314	0.00843263
0.13505	0.142071	0.00844185
0.13556	0.150781	0.00839341
0.13606	0.135865	0.00839937
0.13657	0.135627	0.00838489
0.13708	0.141526	0.00830161
0.13758	0.141428	0.00827077
0.13809	0.149597	0.00829163
0.1386	0.13854	0.00825627
0.13911	0.152034	0.00816865
0.13961	0.14383	0.00813996
0.14012	0.135175	0.00816952
0.14063	0.14269	0.00811895
0.14113	0.127579	0.00815628
0.14164	0.137679	0.00812385
0.14215	0.128202	0.00811251
0.14265	0.137243	0.00803613
0.14316	0.130579	0.00804321
0.14367	0.128029	0.00803371
0.14417	0.141776	0.0080093
0.14468	0.130609	0.00797299
0.14519	0.126325	0.00797614
0.14569	0.127127	0.00789019
0.1462	0.137076	0.00793926
0.14671	0.12041	0.00795185
0.14721	0.123469	0.0078883
0.14772	0.121308	0.0078277
0.14823	0.111979	0.00789234
0.14873	0.127075	0.00787344
0.14924	0.126203	0.00782505
0.14975	0.122328	0.00779921
0.15025	0.119691	0.00777626
0.15076	0.115991	0.0077682
0.15127	0.114343	0.00774253
0.15177	0.118986	0.00769533
0.15228	0.106313	0.00768376
0.15279	0.123327	0.0076541
0.15329	0.117379	0.0076719
0.1538	0.109983	0.00769114
0.15431	0.113325	0.00763641
0.15481	0.112281	0.00758509
0.15532	0.108873	0.00766186
0.15583	0.112562	0.007551
0.15633	0.109952	0.00754863
0.15684	0.110384	0.00748359
0.15735	0.110438	0.00746491
0.15785	0.107249	0.00746765
0.15836	0.116149	0.0074863
0.15887	0.113967	0.00747828
0.15937	0.101028	0.0074438
0.15988	0.114146	0.00739627
0.16039	0.111994	0.00742563
0.16089	0.106178	0.00743224
0.1614	0.102246	0.00740479
0.16191	0.106251	0.00738659
0.16241	0.108784	0.00737635
0.16292	0.100984	0.00733622
0.16343	0.115348	0.00731905
0.16393	0.104567	0.00735177
0.16444	0.116126	0.00727105
0.16495	0.0986151	0.00729615
0.16545	0.105183	0.0072984
0.16596	0.105479	0.00725031
0.16647	0.0973179	0.00725571
0.16697	0.103102	0.00719965
0.16748	0.102666	0.00724556
0.16799	0.099551	0.00724819
0.16849	0.0912369	0.00710917
0.169	0.100483	0.00722278
0.16951	0.0984782	0.00724145
0.17001	0.0800969	0.00724477
0.17052	0.0912456	0.00732462
0.17103	0.106602	0.00739634
0.17153	0.0890862	0.0072697
0.17204	0.0991692	0.00733274
0.17255	0.0974228	0.00736357
0.17305	0.0960623	0.00736386
0.17356	0.0885556	0.00738378
0.17407	0.0980813	0.00731952
0.17457	0.0913613	0.00739903
0.17508	0.102418	0.00735512
0.17559	0.0974628	0.00735757
0.1761	0.0952395	0.00743532
0.1766	0.0994985	0.00734549
0.17711	0.0927985	0.00735854
0.17762	0.100518	0.00741368
0.17812	0.0839656	0.0074113
0.17863	0.0866721	0.00737737
0.17914	0.0890003	0.00730259
0.17964	0.0820295	0.00734715
0.18015	0.0907836	0.00742651
0.18066	0.0827049	0.00749615
0.18116	0.0865385	0.0075016
0.18167	0.0885208	0.00752046
0.18218	0.0833264	0.00748247
0.18268	0.0823713	0.00753347
0.18319	0.0844636	0.00756296
0.1837	0.0949603	0.00756979
0.1842	0.0721056	0.0076443
0.18471	0.0884149	0.00769739
0.18522	0.0849087	0.00766933
0.18572	0.0798718	0.00770828
0.18623	0.0964828	0.00766823
0.18674	0.0826995	0.00771655
0.18724	0.08303	0.00775913
0.18775	0.0814464	0.00775721
0.18826	0.0923236	0.00779172
0.18876	0.083521	0.00776864
0.18927	0.0860595	0.00777943
0.18978	0.0821356	0.00782457
0.19028	0.0768541	0.00783841
0.19079	0.09242	0.00782481
0.1913	0.0753256	0.00786206
0.1918	0.0818174	0.00789167
0.19231	0.0799977	0.00783232
0.19282	0.0830408	0.00789246
0.19332	0.0726269	0.00790966
0.19383	0.0724218	0.00788302
0.19434	0.0807287	0.00791355
0.19484	0.0841495	0.00793109
0.19535	0.0743728	0.00789231
0.19586	0.0749033	0.00792707
0.19636	0.0809503	0.007933
0.19687	0.0706067	0.00796465
0.19738	0.0812079	0.00802018
0.19788	0.0690274	0.00793885
0.19839	0.0803446	0.00797835
0.1989	0.0721823	0.00795086
0.1994	0.0651805	0.0079856
0.19991	0.0697164	0.00798237
0.20042	0.0777772	0.00798414
0.20092	0.0798044	0.00795901
0.20143	0.0805918	0.00799457
0.20194	0.0757813	0.00804172
0.20244	0.0738695	0.00801685
0.20295	0.0760313	0.00802181
0.20346	0.0778164	0.00801412
0.20396	0.0739144	0.00802529
0.20447	0.0684887	0.00807198
0.20498	0.0783192	0.0080417
0.20548	0.0691187	0.00802084
0.20599	0.0625933	0.00807368
0.2065	0.061109	0.00803614
0.207	0.0692021	0.00806166
0.20751	0.0656477	0.00797708
0.20802	0.0682164	0.00793919
0.20852	0.0666897	0.00790661
0.20903	0.0715474	0.00794573
0.20954	0.0641979	0.00797895
0.21004	0.0671505	0.0079532
0.21055	0.072081	0.00793575
0.21106	0.0640669	0.00799092
0.21156	0.0671592	0.00799806
0.21207	0.0705005	0.00795539
0.21258	0.0725518	0.00796285
0.21308	0.0721674	0.00794607
0.21359	0.0796136	0.00796887
0.2141	0.0780403	0.00795205
0.2146	0.0713359	0.00795553
0.21511	0.0581295	0.00793048
0.21562	0.0721492	0.0079218
0.21612	0.074151	0.00790622
0.21663	0.0638	0.00794929
0.21714	0.0637059	0.00792355
0.21764	0.0630128	0.00784931
0.21815	0.0611238	0.00791679
0.21866	0.0626536	0.00791121
0.21916	0.0587197	0.0078887
0.21967	0.0698674	0.00786225
0.22018	0.0671103	0.00779617
0.22068	0.0696946	0.00783277
0.22119	0.0633523	0.00779087
0.2217	0.0599044	0.00780764
0.2222	0.0641223	0.00781025
0.22271	0.0586315	0.00776449
0.22322	0.0621713	0.00777088
0.22372	0.0722792	0.00774404
0.22423	0.0628026	0.00771209
0.22474	0.0631241	0.00766665
0.22524	0.0648472	0.00769769
0.22575	0.0572518	0.00768204
0.22626	0.0572285	0.00764932
0.22676	0.0614144	0.0076491
0.22727	0.0609251	0.00754173
0.22778	0.0744687	0.0075871
0.22828	0.05599	0.00753876
0.22879	0.0582721	0.00757506
0.2293	0.0508315	0.00751931
0.2298	0.0700887	0.00750176
0.23031	0.05755	0.00749742
0.23082	0.0617828	0.00748437
0.23132	0.0592549	0.00743737
0.23183	0.0542559	0.00745659
0.23234	0.0558605	0.00736138
0.23284	0.0546833	0.00732168
0.23335	0.0580269	0.00728431
0.23386	0.0574715	0.00725818
0.23436	0.0582246	0.00724551
0.23487	0.0662364	0.00728207
0.23538	0.0528403	0.00725809
0.23588	0.0581585	0.00725992
0.23639	0.0537451	0.00725093
0.2369	0.0593721	0.00715803
0.2374	0.0576487	0.00720655
0.23791	0.05763	0.0071972
0.23842	0.0594449	0.00720874
0.23892	0.0543828	0.00712633
0.23943	0.0497882	0.00713924
0.23994	0.0519013	0.00716007
0.24044	0.0489038	0.00712459
0.24095	0.0663177	0.00707978
0.24145	0.0530438	0.00711124
0.24196	0.0518405	0.0070507
0.24247	0.0570851	0.00706187
0.24297	0.050991	0.00705736
0.24348	0.0542305	0.00705467
0.24399	0.0547551	0.00699467
0.24449	0.0527977	0.00701145
0.245	0.0602028	0.00699346
0.24551	0.0533497	0.0069823
0.24601	0.0476656	0.0069297
0.24652	0.0521295	0.00698215
0.24703	0.0579869	0.00698469
0.24753	0.048911	0.00692672
0.24804	0.0500077	0.00694508
0.24855	0.0524674	0.00690208
0.24905	0.0503933	0.00688873
0.24956	0.0601485	0.00691346
0.25007	0.0420426	0.00688057
0.25057	0.0497164	0.00685021
0.25108	0.0537574	0.00679806
0.25159	0.055329	0.00682647
0.25209	0.0563118	0.00682309
0.2526	0.0505354	0.00680523
0.25311	0.0575956	0.00676924
0.25361	0.0599744	0.00676486
0.25412	0.0473546	0.00673759
0.25463	0.0571749	0.00673773
0.25513	0.0478033	0.00674101
0.25564	0.0454887	0.0067521
0.25615	0.0487626	0.00667922
0.25665	0.0494749	0.00671362
0.25716	0.0497815	0.00669441
0.25767	0.0495567	0.00664898
0.25817	0.0505869	0.00658663
0.25868	0.0466736	0.00655862
0.25919	0.0490621	0.00658215
0.25969	0.0504521	0.00655148
0.2602	0.0545744	0.00655606
0.26071	0.0445749	0.00654661
0.26121	0.0551105	0.00653228
0.26172	0.0412031	0.00655793
0.26223	0.0456136	0.00652214
0.26273	0.0420987	0.00652964
0.26324	0.0498682	0.00650323
0.26375	0.0447436	0.00648786
0.26425	0.0425772	0.00649289
0.26476	0.051661	0.00650152
0.26527	0.0504064	0.00646233
0.26577	0.0514795	0.00643256
0.26628	0.0442274	0.00648272
0.26679	0.0388531	0.00642531
0.26729	0.0475595	0.00643422
0.2678	0.055569	0.0064256
0.26831	0.0424787	0.00639129
0.26881	0.0496762	0.00640021
0.26932	0.0419738	0.0063926
0.26983	0.0419954	0.00638197
0.27033	0.0420449	0.00637072
0.27084	0.034509	0.00636294
0.27134	0.0440721	0.00637629
0.27185	0.0439577	0.00636049
0.27236	0.0438487	0.00632409
0.27286	0.0412549	0.00632209
0.27337	0.0453459	0.00634499
0.27388	0.0372431	0.00628414
0.27438	0.0427062	0.00630804
0.27489	0.0502192	0.00630022
0.2754	0.0384392	0.00626502
0.2759	0.0364695	0.00626738
0.27641	0.0447164	0.00628705
0.27692	0.0422128	0.00627049
0.27742	0.0435203	0.00623004
0.27793	0.0455631	0.0062461
0.27844	0.0469431	0.00626598
0.27894	0.0484062	0.00623352
0.27945	0.0462815	0.00622252
0.27996	0.0400864	0.00626088
0.28046	0.0383444	0.00623814
0.28097	0.03431	0.00621677
0.28148	0.0410118	0.0062301
0.28198	0.0478074	0.00621615
0.28249	0.043299	0.00623044
0.283	0.0411879	0.0062079
0.2835	0.0574705	0.00617713
0.28401	0.0337628	0.00614961
0.28452	0.0437046	0.00611218
0.28502	0.0496528	0.00612704
0.28553	0.0364164	0.00614546
0.28604	0.0412021	0.00616565
0.28654	0.0414544	0.00615676
0.28705	0.0503815	0.00615439
0.28756	0.0452705	0.00615647
0.28806	0.0405833	0.00615406
0.28857	0.0393636	0.00617413
0.28908	0.042141	0.00614257
0.28958	0.0308918	0.00618598
0.29009	0.0408013	0.00614494
0.29059	0.0372764	0.00620412
0.2911	0.0394762	0.00620932
0.29161	0.0448723	0.00616709
0.29211	0.0422969	0.00616941
0.29262	0.03694	0.00620516
0.29313	0.039939	0.00621098
0.29363	0.0485826	0.00618336
0.29414	0.0394049	0.00620079
0.29465	0.0435567	0.00618641
0.29515	0.0452944	0.00619485
0.29566	0.0443115	0.00618687
0.29617	0.0426759	0.00619091
0.29667	0.0426487	0.00614769
0.29718	0.0333059	0.00614838
0.29769	0.0448826	0.00618925
0.29819	0.0372344	0.0061801
0.2987	0.0395428	0.00613454
0.29921	0.0256023	0.00615456
0.29971	0.0347459	0.0061469
0.30022	0.0355577	0.00615469
0.30073	0.035701	0.0061067
0.30123	0.0491162	0.00612887
0.30174	0.0389659	0.00617325
0.30225	0.0387669	0.00612441
0.30275	0.0399564	0.00610752
0.30326	0.0328408	0.00610653
0.30377	0.0415528	0.00608338
0.30427	0.0389851	0.006088
0.30478	0.0374641	0.00608542
0.30529	0.0397392	0.00606632
0.30579	0.0301813	0.00604547
0.3063	0.0357618	0.00600836
0.3068	0.0320056	0.0060046
0.30731	0.0325446	0.00602647
0.30782	0.0342167	0.00600017
0.30832	0.0412451	0.00598552
0.30883	0.0338241	0.00599535
0.30934	0.0405933	0.00599435
0.30984	0.0408526	0.00608473
0.31035	0.0364492	0.00611774
0.31086	0.0382918	0.00619769
0.31136	0.0380279	0.00625302
0.31187	0.0340013	0.00625929
0.31238	0.0348121	0.00630665
0.31288	0.0377782	0.00634873
0.31339	0.0389236	0.00634566
0.3139	0.0400795	0.00638234
0.3144	0.0432949	0.00642296
0.31491	0.0440026	0.00644113
0.31542	0.0331487	0.00645038
0.31592	0.0333241	0.00647671
0.31643	0.0407759	0.00649309
0.31694	0.0346541	0.00654236
0.31744	0.0345997	0.00655118
0.31795	0.0373508	0.00657412
0.31845	0.0424669	0.00656483
0.31896	0.0438046	0.00655694
0.31947	0.0349369	0.00659873
0.31997	0.0390267	0.00657898
0.32048	0.0320164	0.00658791
0.32099	0.0319967	0.00659217
0.32149	0.0427692	0.0065932
0.322	0.0341905	0.00656454
0.32251	0.0378523	0.00658917
0.32301	0.0399469	0.00658074
0.32352	0.0262782	0.00655761
0.32403	0.0335846	0.00658998
0.32453	0.0264979	0.0065474
0.32504	0.0312097	0.00660443
0.32555	0.0370608	0.00657197
0.32605	0.0328146	0.0065984
0.32656	0.0347338	0.00658228
0.32707	0.0313449	0.00657068
0.32757	0.0302097	0.00662056
0.32808	0.0404915	0.0065878
0.32859	0.0307036	0.00661084
0.32909	0.0299695	0.00663423
0.3296	0.0341236	0.00664168
0.3301	0.0285297	0.0066408
0.33061	0.0343374	0.00661827
0.33112	0.0309546	0.00666578
0.33162	0.0264746	0.00666751
0.33213	0.0271885	0.006676
0.33264	0.0345805	0.00667856
0.33314	0.0374626	0.00673101
0.33365	0.0305249	0.00667656
0.33416	0.0241844	0.00670713
0.33466	0.0327274	0.00670268
0.33517	0.0287044	0.00668924
0.33568	0.03347	0.00672993
0.33618	0.0256833	0.0067243
0.33669	0.0365872	0.00673294
0.3372	0.0338579	0.00673476
0.3377	0.0321903	0.00671895
0.33821	0.0318733	0.00676591
0.33872	0.0392974	0.00673453
0.33922	0.0329546	0.00677324
0.33973	0.0390413	0.00675856
0.34023	0.026861	0.00674588
0.34074	0.0395538	0.00677327
0.34125	0.0358141	0.00681092
0.34175	0.0300151	0.00679789
0.34226	0.0236333	0.00678712
0.34277	0.0259072	0.00681698
0.34327	0.021699	0.0067786
0.34378	0.0332728	0.00681177
0.34429	0.035839	0.00678813
0.34479	0.0221603	0.00683366
0.3453	0.0294644	0.00681699
0.34581	0.0255415	0.00681352
0.34631	0.0297936	0.0068481
0.34682	0.0281297	0.00683572
0.34733	0.0225446	0.00679232
0.34783	0.0394613	0.00684108
0.34834	0.0348738	0.00684976
0.34884	0.0326172	0.00688212
0.34935	0.0227174	0.00685193
0.34986	0.0334767	0.00687587
0.35036	0.0288554	0.0068757
0.35087	0.0293256	0.006877
0.35138	0.026469	0.00688856
0.35188	0.0345187	0.00685358
0.35239	0.021101	0.00688063
0.3529	0.027761	0.00686072
0.3534	0.0315105	0.00684482
0.35391	0.02078	0.0067199
0.35442	0.0258682	0.00665001
0.35492	0.0256615	0.00657739
0.35543	0.0248874	0.00660597
0.35594	0.0335544	0.00651381
0.35644	0.0286108	0.00645721
0.35695	0.0285626	0.00645323
0.35745	0.022799	0.00650372
0.35796	0.0310549	0.00655324
0.35847	0.0198656	0.00660407
0.35897	0.0288754	0.00658879
0.35948	0.0273638	0.00658507
0.35999	0.0327377	0.00658437
0.36049	0.0258633	0.00660109
0.361	0.0239759	0.00660244
0.36151	0.0288136	0.00661664
0.36201	0.0348638	0.00660899
0.36252	0.0199995	0.00667324
0.36303	0.0149641	0.00664885
0.36353	0.0255213	0.00666271
0.36404	0.0263113	0.00667364
0.36455	0.0288074	0.00669872
0.36505	0.0339415	0.00670967
0.36556	0.0248736	0.00674491
0.36606	0.0156179	0.00676716
0.36657	0.0267251	0.0067438
0.36708	0.018401	0.00677061
0.36758	0.016819	0.00681888
0.36809	0.0267572	0.00686145
0.3686	0.0245315	0.00694375
0.3691	0.0326405	0.00700933
0.36961	0.0208364	0.00701185
0.37012	0.0226562	0.00703197
0.37062	0.0302323	0.00706098
0.37113	0.0388344	0.00711005
0.37164	0.0270303	0.00709982
0.37214	0.0105869	0.00704245
0.37265	0.0316033	0.00708113
0.37315	0.0325769	0.00711792
0.37366	0.0336554	0.00712915
0.37417	0.0285818	0.00713548
0.37467	0.0278956	0.00718664
0.37518	0.0279723	0.00722846
0.37569	0.0251503	0.00724213
0.37619	0.0176815	0.00728097
0.3767	0.0227392	0.00729686
0.37721	0.0320654	0.00731018
0.37771	0.0231805	0.00734666
0.37822	0.0271244	0.00741219
0.37873	0.0267138	0.00745217
0.37923	0.0182272	0.00746116
0.37974	0.0256969	0.00747854
0.38024	0.0213836	0.00753563
0.38075	0.0321954	0.00753194
0.38126	0.0203364	0.00760021
0.38176	0.0283854	0.00759887
0.38227	0.0178485	0.00767796
0.38278	0.0204121	0.00766813
0.38328	0.0235277	0.00769293
0.38379	0.02599	0.00772647
0.3843	0.022131	0.00775203
0.3848	0.0258323	0.00782673
0.38531	0.0240549	0.00783237
0.38582	0.0326185	0.0078633
0.38632	0.0284951	0.00792454
0.38683	0.0287862	0.00789878
0.38733	0.0266318	0.00792955
0.38784	0.0194805	0.00799978
0.38835	0.0244608	0.00802764
0.38885	0.0158195	0.00804204
0.38936	0.0089241	0.00811995
0.38987	0.02135	0.0081154
0.39037	0.0140126	0.00819035
0.39088	0.0270372	0.00815796
0.39139	0.0390838	0.00831435
0.39189	0.02775	0.00829923
0.3924	0.0255531	0.00829256
0.3929	0.0346733	0.00838075
0.39341	0.0306431	0.00840121
0.39392	0.0238251	0.00845398
0.39442	0.0193077	0.00937139
0.39493	0.0138277	0.00847973
0.39544	0.0287431	0.00861624
0.39594	0.0169138	0.00858014
0.39645	0.0268044	0.00862942
0.39696	0.0222723	0.00863046
0.39746	0.0224033	0.00867938
0.39797	0.0265395	0.00871702
0.39847	0.026941	0.00887235
0.39898	0.01625	0.00881175
0.39949	0.0173323	0.00882229
0.39999	0.0229056	0.00884808
0.4005	0.0182597	0.00895586
0.40101	0.0193944	0.00895563
0.40151	0.0278982	0.00897162
0.40202	0.017121	0.0090619
0.40253	0.0288844	0.00901535
0.40303	0.0195015	0.00906399
0.40354	0.00865795	0.0091045
0.40405	0.0330003	0.00913193
0.40455	0.0198228	0.00918527
0.40506	0.0280485	0.00916568
0.40556	0.0151715	0.00925594
0.40607	0.0180982	0.00922444
0.40658	0.0157544	0.00925637
0.40708	0.0329782	0.00936615
0.40759	0.0186067	0.0093978
0.4081	0.00758718	0.00931765
0.4086	0.032159	0.00939244
0.40911	0.0200828	0.00938797
0.40962	0.0142162	0.00942548
0.41012	0.0258808	0.00937679
0.41063	0.0222562	0.00948173
0.41113	0.0151051	0.00951536
0.41164	0.016391	0.00943061
0.41215	0.0316621	0.0094237
0.41265	0.0239415	0.00951383
0.41316	0.0243174	0.00947893
0.41367	0.0253449	0.00952552
0.41417	0.0223744	0.00955771
0.41468	0.0206444	0.00960204
0.41518	0.0173331	0.00955743
0.41569	0.0292172	0.00962894
0.4162	0.0279141	0.00965985
0.4167	0.0191913	0.00976205
0.41721	0.0202174	0.00968431
0.41772	0.03154	0.00977776
0.41822	0.0230805	0.00978166
0.41873	0.03519	0.00979903
0.41924	0.0143646	0.00983641
0.41974	0.0159974	0.00994848
0.42025	0.00568923	0.0100291
0.42075	0.0104428	0.0100035
0.42126	0.00451795	0.0100096
0.42177	0.0202813	0.0101404
0.42227	0.00680872	0.0102275
0.42278	0.0184587	0.0102101
0.42329	0.0247305	0.0103051
0.42379	0.0160108	0.0104754
0.4243	0.0148669	0.0104441
0.42481	0.0231985	0.0104875
0.42531	0.0211564	0.0105746
0.42582	0.0245526	0.0107456
0.42632	0.0159477	0.0107087
0.42683	0.0274885	0.0108484
0.42734	0.0193944	0.0109595
0.42784	0.0077559	0.0109057
0.42835	0.0256649	0.0109876
0.42886	0.0210051	0.0111119
0.42936	0.0251126	0.0113116
0.42987	0.0388236	0.0112222
0.43037	0.0105121	0.0113336
0.43088	0.0137813	0.0113815
0.43139	0.0224121	0.0114835
0.43189	0.0101308	0.0115346
0.4324	0.0351397	0.011689
0.43291	0.00401667	0.0119176
0.43341	0.0261844	0.0117902
0.43392	0.0179113	0.0119701
0.43443	0.0220446	0.0121003
0.43493	0.00829359	0.0122485
0.43544	0.0141018	0.0122207
0.43594	0.0151779	0.0122688
0.43645	0.0129795	0.0124239
0.43696	0.0163567	0.0125348
0.43746	0.012999	0.0125822
0.43797	0.0129762	0.0127309
0.43848	0.0126672	0.0128655
0.43898	0.0044959	0.0129508
0.43949	0.0161977	0.0130707
0.43999	0.0318246	0.0131894

## Sheet: AavLEA1_200T Fit_4
#q**2_data	ln(I(q))_data	error_data	q**2_fit	ln(I(q))_fit	normalized_residual
0.00012996	0.729396	3.12406	0.000239012	0.696575	0.168893
0.000141848	0.789311	2.60743	0.000254722	0.688206	0.112072
0.000154256	0.895568	1.85659	0.000271261	0.679394	0.22465
0.000166926	0.753539	1.16747	0.00028832	0.670306	-0.189787
0.000180365	0.740616	0.982879	0.00030555	0.661126	0.122725
0.000194324	0.789006	0.718082	0.00032364	0.651489	0.225071
0.000208514	0.850517	0.462315	0.00034225	0.641575	0.206996
0.000223502	0.766331	0.452753	0.000361	0.631585	0.1278
0.000239012	0.758335	0.365674	0.00038064	0.621122	0.7419
0.000254722	0.719871	0.282546	0.0004008	0.610382	-0.147284
0.000271261	0.728267	0.217551	0.00042107	0.599583	0.302705
0.00028832	0.630579	0.209321	0.000442261	0.588293	0.126809
0.00030555	0.681618	0.166971	0.000463972	0.576727	-0.347679
0.00032364	0.680572	0.129218	0.000485762	0.565118	-0.0850478
0.00034225	0.664214	0.10937	0.000508503	0.553003	-0.709122
0.000361	0.644066	0.0976595	0.000531764	0.540611	-0.329254
0.00038064	0.680707	0.0803137	0.000555074	0.528192	-0.347072
0.0004008	0.59939	0.0746301	0.000579365	0.515251	-0.119149
0.00042107	0.617877	0.0604356	0.000604176	0.502033	0.0246122
0.000442261	0.595382	0.0558966	0.000629508	0.488537	1.20962
0.000463972	0.560803	0.0458004	0.000654848	0.475037	-0.50931
0.000485762	0.561637	0.0409338	0.00068121	0.460993	0.085524
0.000508503	0.525455	0.0388477
0.000531764	0.529435	0.0339435
0.000555074	0.51731	0.0313549
0.000579365	0.511816	0.0288323
0.000604176	0.502703	0.0272553
0.000629508	0.51877	0.0249936
0.000654848	0.462944	0.0237433
0.00068121	0.462932	0.0226805
0.000708092	0.423504	0.0225029
0.000734952	0.410975	0.0212815
0.000762864	0.423045	0.020178

## Sheet: AavLEA1_200S_4
Q	I(Q)	Error
0.0114	10.4509	6.56322
0.01191	9.74749	5.84332
0.01242	9.21449	4.63037
0.01292	8.87739	2.50939
0.01343	8.24077	2.09939
0.01394	8.00803	1.60252
0.01444	7.89316	1.09299
0.01495	7.60751	0.991927
0.01546	7.32758	0.794469
0.01596	7.13002	0.586563
0.01647	6.7481	0.461921
0.01698	6.58079	0.401678
0.01748	6.35766	0.33618
0.01799	6.46359	0.26071
0.0185	6.13559	0.216884
0.019	6.00172	0.190866
0.01951	6.01812	0.161202
0.02002	5.78973	0.139604
0.02052	5.76591	0.115505
0.02103	5.63182	0.104804
0.02154	5.57008	0.0833377
0.02204	5.46648	0.0755925
0.02255	5.40658	0.0694303
0.02306	5.33017	0.0609336
0.02356	5.20486	0.0565641
0.02407	5.13813	0.0514427
0.02458	5.15468	0.0486529
0.02509	5.07354	0.0454232
0.02559	5.02775	0.0416929
0.0261	4.90158	0.0394234
0.02661	4.8303	0.037867
0.02711	4.83601	0.0352451
0.02762	4.67084	0.0339806
0.02813	4.68236	0.0332011
0.02863	4.55262	0.0318872
0.02914	4.53908	0.0318425
0.02965	4.43345	0.0314212
0.03015	4.38755	0.0303659
0.03066	4.29415	0.0303226
0.03117	4.25465	0.0292234
0.03167	4.14389	0.029289
0.03218	4.10756	0.0293321
0.03269	4.01885	0.0285352
0.03319	4.01688	0.0281956
0.0337	3.88557	0.0274066
0.03421	3.8317	0.0271054
0.03471	3.72428	0.0268644
0.03522	3.7204	0.0264763
0.03573	3.68797	0.0259944
0.03623	3.6232	0.0258154
0.03674	3.56838	0.0256452
0.03725	3.46219	0.0249699
0.03775	3.45333	0.0249745
0.03826	3.37755	0.024592
0.03877	3.29021	0.0239858
0.03927	3.28387	0.0239156
0.03978	3.21446	0.0232646
0.04029	3.16571	0.0232832
0.0408	3.10975	0.023039
0.0413	3.03501	0.0226002
0.04181	3.01437	0.0226894
0.04232	2.99221	0.0223064
0.04282	2.92407	0.0221389
0.04333	2.88994	0.0218358
0.04384	2.83527	0.0218823
0.04434	2.80342	0.0214716
0.04485	2.74243	0.0211618
0.04536	2.69981	0.0211619
0.04586	2.68732	0.0205451
0.04637	2.61693	0.0208411
0.04688	2.59464	0.0205299
0.04738	2.5417	0.0203815
0.04789	2.49838	0.0202231
0.0484	2.47642	0.0196192
0.0489	2.39992	0.0198526
0.04941	2.41036	0.0196561
0.04992	2.35744	0.019164
0.05042	2.32511	0.0187002
0.05093	2.31091	0.0187771
0.05144	2.27058	0.0186566
0.05194	2.24452	0.018331
0.05245	2.18209	0.0183351
0.05296	2.13951	0.0179454
0.05346	2.14332	0.0180025
0.05397	2.0946	0.0178767
0.05448	2.0632	0.0176523
0.05498	2.01222	0.0176327
0.05549	2.00272	0.0173103
0.056	1.96612	0.0174192
0.0565	1.93	0.0172651
0.05701	1.90815	0.0169937
0.05752	1.90295	0.0170287
0.05803	1.86471	0.0167424
0.05853	1.79584	0.0166425
0.05904	1.79987	0.0166806
0.05955	1.77001	0.0164583
0.06005	1.76277	0.0162025
0.06056	1.70155	0.0162996
0.06107	1.71537	0.0162691
0.06157	1.66194	0.0160192
0.06208	1.66379	0.0158645
0.06259	1.62247	0.0157702
0.06309	1.6139	0.0157318
0.0636	1.58265	0.0156489
0.06411	1.59712	0.0155373
0.06461	1.56836	0.0155445
0.06512	1.52361	0.0152362
0.06563	1.50773	0.0151052
0.06613	1.49367	0.0151625
0.06664	1.46682	0.015049
0.06715	1.46205	0.0149476
0.06765	1.44344	0.0147405
0.06816	1.42095	0.0147705
0.06867	1.38595	0.0145931
0.06917	1.37018	0.0145546
0.06968	1.36483	0.0145412
0.07019	1.34025	0.0142123
0.07069	1.324	0.0143046
0.0712	1.30646	0.0142873
0.07171	1.28408	0.0141539
0.07221	1.27447	0.0140774
0.07272	1.2739	0.0138071
0.07323	1.25102	0.0140834
0.07373	1.23323	0.0137636
0.07424	1.21615	0.0136216
0.07475	1.21017	0.0135801
0.07526	1.18322	0.0136307
0.07576	1.16731	0.0135406
0.07627	1.1563	0.0134276
0.07678	1.15687	0.0133773
0.07728	1.13092	0.0130552
0.07779	1.13773	0.0130807
0.0783	1.11438	0.0130167
0.0788	1.0975	0.0129649
0.07931	1.10871	0.012889
0.07982	1.07618	0.0127151
0.08032	1.07542	0.0130193
0.08083	1.05697	0.0130075
0.08134	1.04226	0.0130256
0.08184	1.02836	0.0131612
0.08235	1.01572	0.012939
0.08286	1.01513	0.0129957
0.08336	1.00231	0.0130809
0.08387	0.994809	0.0131003
0.08438	0.959514	0.0129735
0.08488	0.963605	0.0129608
0.08539	0.966771	0.0130419
0.0859	0.958584	0.01296
0.0864	0.945181	0.0129949
0.08691	0.929026	0.012935
0.08742	0.915281	0.012861
0.08792	0.913084	0.0127913
0.08843	0.891722	0.0129094
0.08894	0.887258	0.0128636
0.08944	0.887005	0.0127373
0.08995	0.888209	0.0129209
0.09046	0.867303	0.0132308
0.09096	0.864868	0.0130607
0.09147	0.852949	0.0131791
0.09198	0.847662	0.0130805
0.09248	0.846326	0.0129013
0.09299	0.825201	0.0128398
0.0935	0.824837	0.0126499
0.09401	0.811048	0.0126632
0.09451	0.792107	0.0126179
0.09502	0.791895	0.0125506
0.09553	0.783777	0.0124929
0.09603	0.784343	0.0124877
0.09654	0.77336	0.0123148
0.09705	0.776012	0.0122851
0.09755	0.775979	0.0123079
0.09806	0.753824	0.012317
0.09857	0.740009	0.234707
0.09907	0.753019	0.0122305
0.09958	0.720107	0.0122477
0.10009	0.735476	0.0121339
0.10059	0.72365	0.012053
0.1011	0.734284	0.0119618
0.10161	0.70196	0.0116993
0.10211	0.702442	0.011577
0.10262	0.695079	0.011524
0.10313	0.688262	0.0115954
0.10363	0.67274	0.0117012
0.10414	0.683006	0.0117214
0.10465	0.683383	0.011821
0.10515	0.683	0.0117714
0.10566	0.659004	0.011697
0.10617	0.654498	0.0114518
0.10667	0.659604	0.0113901
0.10718	0.651576	0.0113031
0.10769	0.644996	0.0111895
0.10819	0.640081	0.0111007
0.1087	0.629235	0.0109526
0.10921	0.633665	0.0108887
0.10971	0.626987	0.0109597
0.11022	0.614416	0.010836
0.11073	0.620098	0.0108006
0.11123	0.611073	0.0107194
0.11174	0.611142	0.0106825
0.11225	0.597412	0.0106713
0.11275	0.585087	0.0106066
0.11326	0.578532	0.0105588
0.11377	0.576776	0.0103923
0.11428	0.585144	0.0104936
0.11478	0.563025	0.010414
0.11529	0.574191	0.0102882
0.1158	0.577372	0.0102686
0.1163	0.550984	0.0101383
0.11681	0.563528	0.0101796
0.11732	0.551794	0.0101176
0.11782	0.554311	0.010088
0.11833	0.542932	0.0100206
0.11884	0.537448	0.00997797
0.11934	0.549319	0.00990615
0.11985	0.524609	0.00989943
0.12036	0.519132	0.00985568
0.12086	0.526488	0.00976711
0.12137	0.511372	0.00977571
0.12188	0.514745	0.00974483
0.12238	0.508075	0.00970918
0.12289	0.505517	0.00962486
0.1234	0.520177	0.00963631
0.1239	0.503254	0.00957946
0.12441	0.488207	0.00955421
0.12492	0.497114	0.00948282
0.12542	0.48955	0.00946398
0.12593	0.482095	0.00940735
0.12644	0.477335	0.00941377
0.12694	0.483568	0.00943206
0.12745	0.472007	0.00929151
0.12796	0.487927	0.009211
0.12846	0.476629	0.00914853
0.12897	0.46726	0.00911349
0.12948	0.473907	0.00917456
0.12998	0.467252	0.00911427
0.13049	0.459477	0.00900407
0.131	0.462972	0.00898998
0.1315	0.451518	0.0089291
0.13201	0.449341	0.00880716
0.13252	0.45707	0.00890014
0.13302	0.442621	0.00881814
0.13353	0.449038	0.00880591
0.13404	0.444284	0.00885102
0.13454	0.443399	0.00878464
0.13505	0.423818	0.00879765
0.13556	0.435572	0.00870563
0.13606	0.436366	0.00874803
0.13657	0.421474	0.00873061
0.13708	0.417066	0.00866622
0.13758	0.428252	0.00861598
0.13809	0.423059	0.00861246
0.1386	0.418737	0.00857178
0.13911	0.423118	0.00851432
0.13961	0.411087	0.00848806
0.14012	0.412887	0.00847781
0.14063	0.403839	0.00845992
0.14113	0.403506	0.0084613
0.14164	0.404075	0.00845421
0.14215	0.40053	0.00839776
0.14265	0.389356	0.00833885
0.14316	0.402447	0.00835673
0.14367	0.383589	0.00837981
0.14417	0.390778	0.008307
0.14468	0.385362	0.00829127
0.14519	0.38953	0.00826168
0.14569	0.38033	0.00821275
0.1462	0.383092	0.00825855
0.14671	0.376185	0.00823839
0.14721	0.372142	0.00819315
0.14772	0.371089	0.0081669
0.14823	0.369809	0.00816937
0.14873	0.360805	0.00814427
0.14924	0.360558	0.00811182
0.14975	0.367103	0.00808831
0.15025	0.37295	0.00806775
0.15076	0.355639	0.00808236
0.15127	0.361792	0.00803578
0.15177	0.347727	0.00803278
0.15228	0.352949	0.00797313
0.15279	0.363006	0.00796776
0.15329	0.347797	0.00795607
0.1538	0.324536	0.00797309
0.15431	0.343537	0.00792839
0.15481	0.331316	0.00787013
0.15532	0.335212	0.0079518
0.15583	0.337925	0.00781115
0.15633	0.336438	0.00777252
0.15684	0.335842	0.00777514
0.15735	0.325785	0.00770754
0.15785	0.330214	0.00772701
0.15836	0.319015	0.00778697
0.15887	0.320878	0.00775381
0.15937	0.320501	0.00770633
0.15988	0.32169	0.00766332
0.16039	0.327497	0.00767247
0.16089	0.316148	0.00770046
0.1614	0.313675	0.00764152
0.16191	0.305585	0.00759712
0.16241	0.307578	0.00763493
0.16292	0.311137	0.00757417
0.16343	0.305864	0.00756759
0.16393	0.309182	0.00760623
0.16444	0.309736	0.00752294
0.16495	0.301075	0.00754843
0.16545	0.303151	0.00754461
0.16596	0.297765	0.00751008
0.16647	0.299649	0.00752228
0.16697	0.294328	0.00742991
0.16748	0.292969	0.00746192
0.16799	0.284305	0.00747479
0.16849	0.291109	0.00736221
0.169	0.290858	0.00742482
0.16951	0.292093	0.00747219
0.17001	0.2944	0.00751462
0.17052	0.288533	0.00755253
0.17103	0.290445	0.00760482
0.17153	0.279377	0.00754057
0.17204	0.282754	0.0075604
0.17255	0.276581	0.00760586
0.17305	0.286636	0.00760798
0.17356	0.284263	0.00762707
0.17407	0.275973	0.00756655
0.17457	0.287832	0.00763391
0.17508	0.270729	0.00759495
0.17559	0.275718	0.0076327
0.1761	0.272443	0.00766137
0.1766	0.271129	0.00760487
0.17711	0.273182	0.00758415
0.17762	0.266492	0.00764345
0.17812	0.277593	0.00765806
0.17863	0.272368	0.00760288
0.17914	0.259635	0.00756442
0.17964	0.264678	0.00759613
0.18015	0.257743	0.00768095
0.18066	0.253821	0.00772679
0.18116	0.26213	0.00775923
0.18167	0.251598	0.00779631
0.18218	0.268179	0.00775335
0.18268	0.245307	0.00774852
0.18319	0.248532	0.00781933
0.1837	0.262521	0.00784498
0.1842	0.255184	0.00784533
0.18471	0.253171	0.00794608
0.18522	0.250792	0.00794066
0.18572	0.237641	0.0079588
0.18623	0.263024	0.00791195
0.18674	0.245268	0.00797227
0.18724	0.235997	0.00801809
0.18775	0.236421	0.00800938
0.18826	0.236825	0.00803929
0.18876	0.245152	0.00798345
0.18927	0.238422	0.00805697
0.18978	0.23984	0.00806164
0.19028	0.243252	0.00811166
0.19079	0.235748	0.00806021
0.1913	0.244619	0.00807592
0.1918	0.236088	0.00812848
0.19231	0.225649	0.00811238
0.19282	0.237776	0.00813861
0.19332	0.221381	0.0081411
0.19383	0.244022	0.00813424
0.19434	0.226068	0.00814831
0.19484	0.223884	0.00817909
0.19535	0.228738	0.00817463
0.19586	0.224566	0.00821891
0.19636	0.226082	0.00817093
0.19687	0.231415	0.00822068
0.19738	0.224825	0.00823806
0.19788	0.218295	0.00816067
0.19839	0.219364	0.00821006
0.1989	0.221441	0.00820963
0.1994	0.223044	0.00821548
0.19991	0.220542	0.00823635
0.20042	0.212467	0.00822316
0.20092	0.222906	0.00822963
0.20143	0.212546	0.00825476
0.20194	0.225208	0.00824896
0.20244	0.210834	0.00825758
0.20295	0.227553	0.00821371
0.20346	0.210352	0.00825651
0.20396	0.221654	0.0082588
0.20447	0.209046	0.0083203
0.20498	0.212246	0.00826981
0.20548	0.216057	0.00826787
0.20599	0.205776	0.00826815
0.2065	0.206079	0.00829219
0.207	0.205935	0.00827743
0.20751	0.209674	0.00820863
0.20802	0.20759	0.00818888
0.20852	0.200618	0.0081357
0.20903	0.203542	0.00818699
0.20954	0.200406	0.00820178
0.21004	0.191867	0.00820644
0.21055	0.206721	0.00817667
0.21106	0.203338	0.00824051
0.21156	0.201081	0.00825462
0.21207	0.203682	0.00821118
0.21258	0.195217	0.00815771
0.21308	0.202026	0.00816946
0.21359	0.203231	0.00822699
0.2141	0.196393	0.00820749
0.2146	0.200243	0.0081834
0.21511	0.194684	0.00815745
0.21562	0.203665	0.00816587
0.21612	0.192684	0.00813044
0.21663	0.191199	0.0081905
0.21714	0.193293	0.00813638
0.21764	0.195581	0.00809315
0.21815	0.187628	0.00811829
0.21866	0.195713	0.0081182
0.21916	0.196345	0.00808942
0.21967	0.189613	0.00810657
0.22018	0.183512	0.00803525
0.22068	0.180697	0.00806044
0.22119	0.192091	0.00803204
0.2217	0.182897	0.00801426
0.2222	0.183381	0.00800353
0.22271	0.190148	0.00797085
0.22322	0.184196	0.00797578
0.22372	0.182983	0.00797018
0.22423	0.192154	0.00791334
0.22474	0.18403	0.00788926
0.22524	0.174613	0.00788405
0.22575	0.189849	0.0079057
0.22626	0.18636	0.00784942
0.22676	0.17818	0.00784785
0.22727	0.171829	0.00776129
0.22778	0.174182	0.00780193
0.22828	0.168736	0.00775834
0.22879	0.179442	0.00776237
0.2293	0.166657	0.00773964
0.2298	0.172067	0.00770818
0.23031	0.173073	0.00770196
0.23082	0.17257	0.00770112
0.23132	0.17685	0.00765901
0.23183	0.174581	0.00762061
0.23234	0.163424	0.00758592
0.23284	0.175498	0.00753875
0.23335	0.167708	0.0074745
0.23386	0.179446	0.00745318
0.23436	0.169758	0.00748331
0.23487	0.177654	0.0074617
0.23538	0.164253	0.00743146
0.23588	0.161842	0.00745335
0.23639	0.169847	0.00744132
0.2369	0.16863	0.00735242
0.2374	0.164892	0.00740845
0.23791	0.159329	0.00740329
0.23842	0.160047	0.00740428
0.23892	0.173199	0.00733758
0.23943	0.163963	0.00732617
0.23994	0.161665	0.00735396
0.24044	0.158596	0.00733036
0.24095	0.158389	0.00728958
0.24145	0.171667	0.00727971
0.24196	0.16547	0.00725168
0.24247	0.172333	0.00722982
0.24297	0.16223	0.00727499
0.24348	0.163702	0.00725071
0.24399	0.158061	0.00717381
0.24449	0.159591	0.00719515
0.245	0.163925	0.00718112
0.24551	0.152501	0.00714776
0.24601	0.16437	0.00715236
0.24652	0.165407	0.00714992
0.24703	0.158793	0.00715818
0.24753	0.151369	0.00709754
0.24804	0.154884	0.0071281
0.24855	0.148866	0.00706372
0.24905	0.147231	0.00705134
0.24956	0.151025	0.00706934
0.25007	0.152027	0.00706777
0.25057	0.15052	0.00703516
0.25108	0.152142	0.00697403
0.25159	0.158024	0.0070151
0.25209	0.154734	0.00701183
0.2526	0.152719	0.00698863
0.25311	0.151587	0.0069646
0.25361	0.145	0.00695415
0.25412	0.150961	0.00691907
0.25463	0.149857	0.0069051
0.25513	0.145846	0.00691609
0.25564	0.154348	0.00690715
0.25615	0.151607	0.00682166
0.25665	0.146146	0.00688808
0.25716	0.159213	0.00684205
0.25767	0.147844	0.00681974
0.25817	0.139914	0.00676595
0.25868	0.144889	0.00673929
0.25919	0.151371	0.00674573
0.25969	0.141206	0.00672628
0.2602	0.133329	0.00671213
0.26071	0.144137	0.00671139
0.26121	0.146352	0.00672239
0.26172	0.142698	0.00673032
0.26223	0.145134	0.00670552
0.26273	0.144586	0.00668814
0.26324	0.142504	0.00667
0.26375	0.141281	0.00666272
0.26425	0.133893	0.00666656
0.26476	0.14617	0.00668601
0.26527	0.137317	0.00663812
0.26577	0.138752	0.00661345
0.26628	0.133924	0.00665668
0.26679	0.14506	0.00659617
0.26729	0.131947	0.00659947
0.2678	0.135494	0.00659779
0.26831	0.124147	0.00654728
0.26881	0.147356	0.00657311
0.26932	0.138917	0.00656168
0.26983	0.134971	0.00654764
0.27033	0.133396	0.00653021
0.27084	0.137998	0.00652207
0.27134	0.129837	0.0065398
0.27185	0.132942	0.0065233
0.27236	0.133729	0.00648046
0.27286	0.136121	0.00648009
0.27337	0.136964	0.00650812
0.27388	0.139584	0.00646577
0.27438	0.123446	0.0064525
0.27489	0.129192	0.00646575
0.2754	0.131447	0.0064232
0.2759	0.136558	0.00643378
0.27641	0.127679	0.00643863
0.27692	0.144729	0.0064257
0.27742	0.131051	0.00640048
0.27793	0.121704	0.0063981
0.27844	0.135842	0.00640014
0.27894	0.12693	0.0064038
0.27945	0.131374	0.00637131
0.27996	0.12239	0.00641327
0.28046	0.136708	0.00640345
0.28097	0.128536	0.00636148
0.28148	0.124577	0.00639683
0.28198	0.128045	0.00637842
0.28249	0.136097	0.00636595
0.283	0.119147	0.00634788
0.2835	0.130626	0.00635345
0.28401	0.117654	0.00633621
0.28452	0.124175	0.00628172
0.28502	0.116737	0.00628233
0.28553	0.128677	0.0063267
0.28604	0.126062	0.00630739
0.28654	0.118725	0.00630791
0.28705	0.121999	0.00630961
0.28756	0.131862	0.0063291
0.28806	0.12305	0.00631549
0.28857	0.127755	0.00631053
0.28908	0.121906	0.00630702
0.28958	0.131359	0.00633315
0.29009	0.12148	0.00630627
0.29059	0.12014	0.00633587
0.2911	0.122768	0.00635969
0.29161	0.116416	0.0063023
0.29211	0.126573	0.00632728
0.29262	0.115923	0.00635402
0.29313	0.120638	0.00637051
0.29363	0.118497	0.00634601
0.29414	0.126412	0.00634641
0.29465	0.113143	0.00633372
0.29515	0.115985	0.00633994
0.29566	0.130968	0.0063272
0.29617	0.12292	0.00634104
0.29667	0.119744	0.0063347
0.29718	0.123483	0.006298
0.29769	0.109845	0.00632883
0.29819	0.112949	0.00634355
0.2987	0.111589	0.00626904
0.29921	0.119429	0.00632025
0.29971	0.12916	0.00630293
0.30022	0.110783	0.00631628
0.30073	0.113497	0.00627794
0.30123	0.118419	0.00629055
0.30174	0.122793	0.0063115
0.30225	0.101093	0.00626917
0.30275	0.107814	0.00625534
0.30326	0.120448	0.00624706
0.30377	0.112466	0.00623402
0.30427	0.108452	0.00622834
0.30478	0.109504	0.00620832
0.30529	0.112082	0.006218
0.30579	0.117172	0.00622129
0.3063	0.113264	0.00617636
0.3068	0.104892	0.00615006
0.30731	0.110041	0.00617457
0.30782	0.116836	0.00614475
0.30832	0.103796	0.00614465
0.30883	0.112586	0.00611957
0.30934	0.109907	0.00613739
0.30984	0.100921	0.00622237
0.31035	0.105686	0.00627417
0.31086	0.114164	0.00635423
0.31136	0.112331	0.00640677
0.31187	0.106123	0.00641244
0.31238	0.110176	0.00649239
0.31288	0.113708	0.00650093
0.31339	0.107619	0.00650256
0.3139	0.110111	0.00655519
0.3144	0.100013	0.00657163
0.31491	0.0995732	0.00659184
0.31542	0.108658	0.00662448
0.31592	0.107619	0.00661366
0.31643	0.105515	0.00667402
0.31694	0.103046	0.00669354
0.31744	0.102734	0.0067012
0.31795	0.110253	0.00672365
0.31845	0.102052	0.00671699
0.31896	0.107782	0.00674978
0.31947	0.102488	0.00674587
0.31997	0.106466	0.00671909
0.32048	0.105382	0.00674368
0.32099	0.107598	0.0067259
0.32149	0.102699	0.0067572
0.322	0.105966	0.00673488
0.32251	0.101176	0.00673613
0.32301	0.0976279	0.00673369
0.32352	0.0967266	0.00672872
0.32403	0.10044	0.0067295
0.32453	0.101423	0.00670445
0.32504	0.108854	0.00676703
0.32555	0.100352	0.0067067
0.32605	0.102661	0.00679073
0.32656	0.108351	0.00675134
0.32707	0.107923	0.00675321
0.32757	0.105734	0.00677195
0.32808	0.0988518	0.00674951
0.32859	0.0941108	0.00677396
0.32909	0.10111	0.00677633
0.3296	0.100502	0.0067894
0.3301	0.104454	0.00680395
0.33061	0.0934447	0.00679015
0.33112	0.0914908	0.00681847
0.33162	0.101119	0.00681495
0.33213	0.0979382	0.00685558
0.33264	0.0961445	0.00683534
0.33314	0.10564	0.00686351
0.33365	0.0999505	0.00684671
0.33416	0.100126	0.00686304
0.33466	0.100017	0.00687811
0.33517	0.0990074	0.00687058
0.33568	0.0983426	0.0068779
0.33618	0.0956668	0.0068669
0.33669	0.0918366	0.00687748
0.3372	0.0915745	0.00689808
0.3377	0.0923671	0.00686658
0.33821	0.0940761	0.00693548
0.33872	0.0868476	0.00691621
0.33922	0.0985463	0.00691921
0.33973	0.0965434	0.00691198
0.34023	0.09558	0.00692661
0.34074	0.0976863	0.00692707
0.34125	0.0949358	0.00694852
0.34175	0.0936439	0.00696282
0.34226	0.0913842	0.00696635
0.34277	0.0945129	0.00696299
0.34327	0.0850463	0.00694528
0.34378	0.0927118	0.00697066
0.34429	0.0837813	0.00695192
0.34479	0.0883634	0.00699894
0.3453	0.0825479	0.00696567
0.34581	0.0894653	0.00696084
0.34631	0.0979529	0.00699003
0.34682	0.0944734	0.00698622
0.34733	0.0919908	0.00698362
0.34783	0.0861863	0.00701316
0.34834	0.0905247	0.0070227
0.34884	0.0959642	0.00705928
0.34935	0.0918611	0.00702677
0.34986	0.0907358	0.0070548
0.35036	0.0932247	0.00703611
0.35087	0.08373	0.00704815
0.35138	0.0921074	0.00705321
0.35188	0.0887634	0.00700899
0.35239	0.0902555	0.00704484
0.3529	0.0931247	0.00700822
0.3534	0.0910795	0.00698436
0.35391	0.0834142	0.0068397
0.35442	0.0850003	0.00681737
0.35492	0.0802084	0.00674733
0.35543	0.0965316	0.00676044
0.35594	0.0875416	0.00665649
0.35644	0.0821834	0.00663493
0.35695	0.0823116	0.0066293
0.35745	0.0787679	0.00665685
0.35796	0.0824658	0.00670715
0.35847	0.0834647	0.00673936
0.35897	0.0850755	0.00672435
0.35948	0.0931763	0.0067518
0.35999	0.0916182	0.00674554
0.36049	0.0845	0.00676247
0.361	0.0860884	0.00677694
0.36151	0.0791158	0.0067734
0.36201	0.092915	0.00676541
0.36252	0.0842561	0.00683239
0.36303	0.0875576	0.00676743
0.36353	0.0874668	0.00684323
0.36404	0.0846753	0.006819
0.36455	0.0881482	0.00686804
0.36505	0.0907934	0.00688976
0.36556	0.0916174	0.00688866
0.36606	0.0787897	0.00693425
0.36657	0.0869779	0.00688548
0.36708	0.0854837	0.00693094
0.36758	0.0790171	0.00696623
0.36809	0.0827358	0.00701862
0.3686	0.0823508	0.00710897
0.3691	0.0813353	0.00716883
0.36961	0.0695992	0.00717648
0.37012	0.0798239	0.00718626
0.37062	0.086665	0.00722864
0.37113	0.0839792	0.00728254
0.37164	0.0681132	0.00728552
0.37214	0.0831205	0.00718349
0.37265	0.0883589	0.00724031
0.37315	0.0714268	0.00728442
0.37366	0.0820997	0.00725515
0.37417	0.082055	0.00729544
0.37467	0.0851818	0.00732277
0.37518	0.0751232	0.0073938
0.37569	0.0774516	0.00740877
0.37619	0.0737005	0.00744885
0.3767	0.0802126	0.00748124
0.37721	0.0710395	0.00748889
0.37771	0.0744084	0.00753098
0.37822	0.0771845	0.00761221
0.37873	0.0774132	0.0076022
0.37923	0.0814005	0.00762793
0.37974	0.0760029	0.00765498
0.38024	0.0786979	0.00768681
0.38075	0.0811218	0.00770884
0.38126	0.0760818	0.0077555
0.38176	0.0629442	0.00777031
0.38227	0.071655	0.00784212
0.38278	0.0813116	0.00782242
0.38328	0.0752095	0.00790211
0.38379	0.07544	0.00794868
0.3843	0.0739295	0.00796122
0.3848	0.0786324	0.00802888
0.38531	0.0688116	0.0080308
0.38582	0.0708863	0.00805684
0.38632	0.0732682	0.00810394
0.38683	0.0719913	0.00809432
0.38733	0.0777587	0.00814043
0.38784	0.0685913	0.00819844
0.38835	0.0631211	0.00823785
0.38885	0.0784955	0.00820492
0.38936	0.0765471	0.00829073
0.38987	0.07441	0.00828327
0.39037	0.0659992	0.00838642
0.39088	0.0779934	0.008346
0.39139	0.0672926	0.00848788
0.39189	0.07632	0.00849568
0.3924	0.0748639	0.00849406
0.3929	0.0682279	0.00854913
0.39341	0.067125	0.00860399
0.39392	0.0755687	0.00863277
0.39442	0.0725011	0.010162
0.39493	0.0756937	0.00869778
0.39544	0.0848971	0.00875553
0.39594	0.0719455	0.00873306
0.39645	0.0723242	0.00878494
0.39696	0.0756174	0.00887168
0.39746	0.0736739	0.00884637
0.39797	0.0703803	0.00896629
0.39847	0.0783195	0.00900029
0.39898	0.0713592	0.00898
0.39949	0.0758882	0.00899961
0.39999	0.0712516	0.00902713
0.4005	0.0754632	0.00916499
0.40101	0.0659697	0.00914415
0.40151	0.0655582	0.00915932
0.40202	0.0833829	0.00931923
0.40253	0.0678608	0.00921588
0.40303	0.0650384	0.00925674
0.40354	0.0713745	0.0093279
0.40405	0.0832716	0.0093689
0.40455	0.0628929	0.00936571
0.40506	0.0768324	0.00940642
0.40556	0.0695547	0.00944124
0.40607	0.0627271	0.00945379
0.40658	0.0646271	0.00945277
0.40708	0.0849308	0.0095709
0.40759	0.0639871	0.00963112
0.4081	0.0716947	0.00958605
0.4086	0.0654837	0.00959996
0.40911	0.0687658	0.00961257
0.40962	0.0783924	0.0096281
0.41012	0.0721782	0.00961758
0.41063	0.0754445	0.00965386
0.41113	0.0581834	0.00975074
0.41164	0.0684258	0.00960794
0.41215	0.0685718	0.00966196
0.41265	0.0645253	0.00973887
0.41316	0.0668237	0.00972655
0.41367	0.0753005	0.00973451
0.41417	0.0715139	0.00972693
0.41468	0.0762213	0.00981583
0.41518	0.0642889	0.00981018
0.41569	0.0497226	0.00980303
0.4162	0.06089	0.00983228
0.4167	0.0749468	0.0100072
0.41721	0.0654976	0.00989717
0.41772	0.0736121	0.00996657
0.41822	0.0631668	0.0100116
0.41873	0.0790332	0.0100566
0.41924	0.0660855	0.0100795
0.41974	0.0680124	0.0101333
0.42025	0.0715053	0.0102483
0.42075	0.0679663	0.0102273
0.42126	0.0557934	0.0102142
0.42177	0.0668271	0.0103857
0.42227	0.0738024	0.0104548
0.42278	0.0660489	0.0104121
0.42329	0.0652108	0.0105547
0.42379	0.0739313	0.0106463
0.4243	0.0829124	0.010638
0.42481	0.0501695	0.0106588
0.42531	0.0616184	0.0108189
0.42582	0.0709034	0.0109947
0.42632	0.07392	0.0109213
0.42683	0.0663745	0.0110836
0.42734	0.0556542	0.0112067
0.42784	0.0815918	0.0111201
0.42835	0.0593089	0.011228
0.42886	0.06349	0.0113881
0.42936	0.0618892	0.0115478
0.42987	0.0717229	0.0114322
0.43037	0.0730216	0.0115906
0.43088	0.0645282	0.0116176
0.43139	0.0538947	0.0118035
0.43189	0.0649976	0.0118482
0.4324	0.0498705	0.0119727
0.43291	0.0639924	0.0121827
0.43341	0.0598563	0.0120851
0.43392	0.0528566	0.0121979
0.43443	0.0591776	0.012355
0.43493	0.0496105	0.0125461
0.43544	0.0710889	0.0125008
0.43594	0.0562434	0.0126105
0.43645	0.08181	0.0127443
0.43696	0.0568168	0.0127597
0.43746	0.0606382	0.012843
0.43797	0.0403016	0.0130644
0.43848	0.0702929	0.0130932
0.43898	0.0522376	0.0131027
0.43949	0.0636768	0.0133413
0.43999	0.0726645	0.0134381

## Sheet: AavLEA1_200S Fit_4
#q**2_data	ln(I(q))_data	error_data	q**2_fit	ln(I(q))_fit	normalized_residual
0.00012996	2.34669	0.628004	0.000361	1.76997	0.694296
0.000141848	2.27701	0.599469	0.00038064	1.75922	1.32721
0.000154256	2.22078	0.50251	0.0004008	1.7482	0.32711
0.000166926	2.18351	0.282672	0.00042107	1.73711	0.741425
0.000180365	2.10909	0.254757	0.000442261	1.72552	0.15644
0.000194324	2.08044	0.200115	0.000463972	1.71365	0.251453
0.000208514	2.066	0.138473	0.000485762	1.70173	-0.223721
0.000223502	2.02914	0.130388	0.000508503	1.68929	-0.130387
0.000239012	1.99164	0.108422	0.000531764	1.67657	-0.278565
0.000254722	1.96431	0.0822667	0.000555074	1.66382	-1.30905
0.000271261	1.90926	0.068452	0.000579365	1.65053	-1.38281
0.00028832	1.88415	0.061038	0.000604176	1.63696	0.311698
0.00030555	1.84966	0.052878	0.000629508	1.62311	0.104036
0.00032364	1.86618	0.0403351	0.000654848	1.60925	0.690382
0.00034225	1.81411	0.0353485	0.00068121	1.59483	-0.655376
0.000361	1.79205	0.0318019	0.000708092	1.58013	-0.665553
0.00038064	1.79478	0.026786	0.000734952	1.56544	1.46187
0.0004008	1.75609	0.0241124
0.00042107	1.75196	0.0200324
0.000442261	1.72843	0.0186093
0.000463972	1.71741	0.0149617
0.000485762	1.69864	0.0138284
0.000508503	1.68762	0.0128418
0.000531764	1.67338	0.0114318
0.000555074	1.64959	0.0108676
0.000579365	1.63669	0.010012
0.000604176	1.6399	0.00943859
0.000629508	1.62404	0.00895296
0.000654848	1.61497	0.00829255
0.00068121	1.58956	0.00804299
0.000708092	1.57491	0.00783947
0.000734952	1.57609	0.00728806
0.000762864	1.54134	0.00727506
0.000791297	1.5438	0.00709066
0.000819677	1.5157	0.00700414

## Sheet: AavLEA1_20T_4
Q	I(Q)	Error
0.0114	6.85241	6.48342
0.01191	7.25246	5.79071
0.01242	6.60333	4.57184
0.01292	6.2941	2.4977
0.01343	6.49236	2.07564
0.01394	6.32391	1.58746
0.01444	6.18467	1.08294
0.01495	5.85981	0.978969
0.01546	5.68186	0.783618
0.01596	5.28095	0.583366
0.01647	5.15511	0.457283
0.01698	5.12674	0.399301
0.01748	5.11139	0.333299
0.01799	4.96654	0.256995
0.0185	4.93718	0.214968
0.019	4.72392	0.18856
0.01951	4.76544	0.160441
0.02002	4.65252	0.138796
0.02052	4.53672	0.113924
0.02103	4.51879	0.103381
0.02154	4.42692	0.083006
0.02204	4.37983	0.0744212
0.02255	4.24008	0.0684102
0.02306	4.20916	0.0603944
0.02356	4.1868	0.0554076
0.02407	4.1801	0.0503033
0.02458	4.08462	0.0479334
0.02509	4.06828	0.0454733
0.02559	3.98171	0.0408605
0.0261	3.89443	0.0391161
0.02661	3.89237	0.0373697
0.02711	3.79539	0.0352454
0.02762	3.75791	0.033847
0.02813	3.68486	0.0331016
0.02863	3.63707	0.0318561
0.02914	3.6113	0.0318132
0.02965	3.59161	0.0316692
0.03015	3.51918	0.0304706
0.03066	3.48963	0.0306807
0.03117	3.37697	0.0293421
0.03167	3.3094	0.0292133
0.03218	3.31261	0.0293789
0.03269	3.27156	0.0284549
0.03319	3.1784	0.0282929
0.0337	3.15402	0.0274818
0.03421	3.06798	0.0275786
0.03471	3.06347	0.0269446
0.03522	3.00578	0.0269767
0.03573	2.93232	0.0261617
0.03623	2.91575	0.0259264
0.03674	2.84312	0.0259906
0.03725	2.81345	0.0254616
0.03775	2.78574	0.0252368
0.03826	2.735	0.02468
0.03877	2.67437	0.0243068
0.03927	2.62001	0.0242347
0.03978	2.58307	0.0237171
0.04029	2.53154	0.0234899
0.0408	2.49993	0.0232589
0.0413	2.46411	0.0228564
0.04181	2.42252	0.0230133
0.04232	2.40809	0.0226043
0.04282	2.36637	0.0224602
0.04333	2.34736	0.022035
0.04384	2.26824	0.0222353
0.04434	2.27722	0.0220017
0.04485	2.19896	0.0214655
0.04536	2.18029	0.0214366
0.04586	2.16388	0.0210575
0.04637	2.12815	0.021288
0.04688	2.09983	0.0208498
0.04738	2.07958	0.0206065
0.04789	2.03749	0.0205682
0.0484	2.00183	0.0201849
0.0489	1.97005	0.0201351
0.04941	1.94657	0.0200801
0.04992	1.93151	0.0196053
0.05042	1.90931	0.0192318
0.05093	1.86941	0.0192856
0.05144	1.84144	0.0190693
0.05194	1.84297	0.0187513
0.05245	1.78383	0.0187791
0.05296	1.74594	0.0183574
0.05346	1.7302	0.0183788
0.05397	1.71259	0.0183784
0.05448	1.6883	0.0181775
0.05498	1.64334	0.0181477
0.05549	1.63549	0.0177999
0.056	1.62512	0.0178617
0.0565	1.60924	0.0178288
0.05701	1.56545	0.0174043
0.05752	1.51954	0.0175299
0.05803	1.51803	0.0172153
0.05853	1.50164	0.0171405
0.05904	1.48882	0.0172024
0.05955	1.43636	0.0168976
0.06005	1.44816	0.0167072
0.06056	1.421	0.0168027
0.06107	1.37765	0.0167278
0.06157	1.39349	0.0165336
0.06208	1.35056	0.016463
0.06259	1.36969	0.0162296
0.06309	1.31496	0.0162457
0.0636	1.30344	0.0160984
0.06411	1.2912	0.0159524
0.06461	1.28117	0.0159261
0.06512	1.26947	0.015738
0.06563	1.23742	0.0156087
0.06613	1.23827	0.0156872
0.06664	1.20979	0.0155621
0.06715	1.21745	0.0154198
0.06765	1.17089	0.0151647
0.06816	1.15952	0.0154264
0.06867	1.15349	0.0150877
0.06917	1.12675	0.0150611
0.06968	1.11934	0.0150592
0.07019	1.11566	0.0148214
0.07069	1.09132	0.0148141
0.0712	1.08691	0.0148242
0.07171	1.07476	0.0146832
0.07221	1.05838	0.0146131
0.07272	1.02968	0.0144622
0.07323	1.00947	0.0145546
0.07373	1.02308	0.014266
0.07424	1.0011	0.0141523
0.07475	1.00609	0.0141263
0.07526	0.994256	0.01416
0.07576	0.969386	0.0140765
0.07627	0.963291	0.0139514
0.07678	0.949817	0.0138882
0.07728	0.952045	0.0135509
0.07779	0.943401	0.0136414
0.0783	0.944194	0.0135846
0.0788	0.930051	0.0135221
0.07931	0.906315	0.0134237
0.07982	0.901074	0.0132656
0.08032	0.896955	0.0135265
0.08083	0.880598	0.0135825
0.08134	0.886416	0.0136067
0.08184	0.868762	0.0137218
0.08235	0.842179	0.0135149
0.08286	0.845765	0.0135846
0.08336	0.836966	0.0137284
0.08387	0.829008	0.013739
0.08438	0.820261	0.0135443
0.08488	0.813462	0.0135215
0.08539	0.804535	0.0136378
0.0859	0.791714	0.0136103
0.0864	0.793811	0.013589
0.08691	0.78588	0.0135112
0.08742	0.782775	0.0135178
0.08792	0.755147	0.0134578
0.08843	0.761678	0.0134611
0.08894	0.751709	0.0135512
0.08944	0.736485	0.0133922
0.08995	0.717815	0.0136397
0.09046	0.722105	0.0138391
0.09096	0.709872	0.0138451
0.09147	0.725808	0.0138163
0.09198	0.715383	0.0137079
0.09248	0.69613	0.013512
0.09299	0.694685	0.013537
0.0935	0.693049	0.0133337
0.09401	0.680866	0.0132438
0.09451	0.680678	0.0132618
0.09502	0.672756	0.0131917
0.09553	0.668773	0.0131968
0.09603	0.654515	0.0131238
0.09654	0.657596	0.0129685
0.09705	0.636817	0.0129939
0.09755	0.636342	0.012988
0.09806	0.633189	0.0129245
0.09857	0.642772	0.303275
0.09907	0.620086	0.0128586
0.09958	0.632529	0.0128542
0.10009	0.609444	0.0128618
0.10059	0.606422	0.0127498
0.1011	0.603128	0.012664
0.10161	0.611451	0.0123895
0.10211	0.606989	0.0121865
0.10262	0.582455	0.0121927
0.10313	0.583759	0.0122446
0.10363	0.59321	0.0123228
0.10414	0.568628	0.0123647
0.10465	0.579302	0.0125226
0.10515	0.579752	0.0124121
0.10566	0.564162	0.0123364
0.10617	0.562343	0.0121192
0.10667	0.563451	0.0120469
0.10718	0.537543	0.0119727
0.10769	0.540352	0.0118561
0.10819	0.547006	0.0117865
0.1087	0.536367	0.011663
0.10921	0.537748	0.0115358
0.10971	0.526904	0.0116174
0.11022	0.514353	0.0115175
0.11073	0.527538	0.0114699
0.11123	0.515593	0.0113653
0.11174	0.513899	0.0113796
0.11225	0.506382	0.0113319
0.11275	0.498021	0.0112373
0.11326	0.500882	0.0112586
0.11377	0.504854	0.0110714
0.11428	0.504916	0.0111116
0.11478	0.495096	0.0110224
0.11529	0.487152	0.010938
0.1158	0.486767	0.0109003
0.1163	0.482054	0.0107822
0.11681	0.483637	0.0107836
0.11732	0.479538	0.0107272
0.11782	0.477258	0.0107362
0.11833	0.477215	0.0106497
0.11884	0.469123	0.0106192
0.11934	0.470335	0.0105315
0.11985	0.459415	0.0105337
0.12036	0.453158	0.0104837
0.12086	0.438544	0.010345
0.12137	0.4494	0.0104228
0.12188	0.45153	0.0103991
0.12238	0.449346	0.0103023
0.12289	0.443272	0.0102724
0.1234	0.447039	0.0102256
0.1239	0.442683	0.0101932
0.12441	0.437399	0.0101622
0.12492	0.421551	0.0101201
0.12542	0.441677	0.0100634
0.12593	0.427021	0.00999608
0.12644	0.428009	0.0100019
0.12694	0.422591	0.0100392
0.12745	0.417387	0.00992687
0.12796	0.414202	0.0098058
0.12846	0.404754	0.00974996
0.12897	0.404005	0.0097426
0.12948	0.405222	0.00977017
0.12998	0.403882	0.00973079
0.13049	0.408109	0.00960845
0.131	0.407502	0.0095581
0.1315	0.396767	0.00952009
0.13201	0.39254	0.00941238
0.13252	0.389225	0.00948875
0.13302	0.393146	0.00941644
0.13353	0.385161	0.00940375
0.13404	0.385528	0.00941764
0.13454	0.382472	0.00938495
0.13505	0.377645	0.00935454
0.13556	0.375713	0.00929693
0.13606	0.378547	0.00932733
0.13657	0.365549	0.00934136
0.13708	0.368696	0.00929434
0.13758	0.373596	0.00922639
0.13809	0.361922	0.00919144
0.1386	0.359226	0.00916922
0.13911	0.364377	0.00910147
0.13961	0.361415	0.00907686
0.14012	0.361155	0.0090412
0.14063	0.355903	0.00899198
0.14113	0.338964	0.00905852
0.14164	0.351505	0.00903433
0.14215	0.359538	0.00896291
0.14265	0.356661	0.00890844
0.14316	0.345965	0.00894316
0.14367	0.34665	0.00896608
0.14417	0.338574	0.00886994
0.14468	0.337778	0.00888088
0.14519	0.336241	0.00882049
0.14569	0.342611	0.00880954
0.1462	0.334424	0.00882314
0.14671	0.353028	0.00887484
0.14721	0.329721	0.00875886
0.14772	0.327798	0.00871504
0.14823	0.329928	0.00876013
0.14873	0.322499	0.00872628
0.14924	0.318848	0.00867172
0.14975	0.321786	0.00866961
0.15025	0.311226	0.00864607
0.15076	0.316859	0.00866656
0.15127	0.319546	0.00863411
0.15177	0.314098	0.00857115
0.15228	0.306432	0.00854285
0.15279	0.310562	0.00852581
0.15329	0.30343	0.0085529
0.1538	0.307539	0.00858131
0.15431	0.303064	0.00847634
0.15481	0.307743	0.00843048
0.15532	0.301417	0.00850399
0.15583	0.300108	0.00837053
0.15633	0.295459	0.00833808
0.15684	0.302321	0.00832685
0.15735	0.299327	0.00828446
0.15785	0.293413	0.008296
0.15836	0.302806	0.00829252
0.15887	0.288869	0.00830883
0.15937	0.282445	0.0082441
0.15988	0.288858	0.00821204
0.16039	0.293003	0.00823354
0.16089	0.273647	0.00825643
0.1614	0.27523	0.00816479
0.16191	0.291839	0.00814539
0.16241	0.286278	0.00819365
0.16292	0.284543	0.008117
0.16343	0.27486	0.0081346
0.16393	0.278191	0.00812367
0.16444	0.272576	0.00807112
0.16495	0.264565	0.00808242
0.16545	0.267715	0.00809868
0.16596	0.281442	0.00804817
0.16647	0.269235	0.00803204
0.16697	0.268623	0.00796214
0.16748	0.264237	0.00801012
0.16799	0.263479	0.00800853
0.16849	0.276378	0.00788697
0.169	0.270946	0.0079529
0.16951	0.277099	0.00802478
0.17001	0.257747	0.00805431
0.17052	0.264644	0.00810654
0.17103	0.254117	0.00817273
0.17153	0.260703	0.00808724
0.17204	0.260473	0.00810788
0.17255	0.254557	0.00817643
0.17305	0.254278	0.00814504
0.17356	0.256136	0.00816585
0.17407	0.250871	0.00810819
0.17457	0.249009	0.00816265
0.17508	0.252509	0.00815744
0.17559	0.250797	0.00815012
0.1761	0.250157	0.0082242
0.1766	0.241447	0.00813946
0.17711	0.244939	0.00814159
0.17762	0.244069	0.00817402
0.17812	0.242979	0.00818552
0.17863	0.256948	0.00813248
0.17914	0.244469	0.00813039
0.17964	0.242888	0.0081555
0.18015	0.239496	0.00822261
0.18066	0.237705	0.0082888
0.18116	0.224285	0.0082935
0.18167	0.231723	0.00833506
0.18218	0.236856	0.00828244
0.18268	0.235403	0.0083336
0.18319	0.237976	0.00838087
0.1837	0.235173	0.0084017
0.1842	0.231464	0.00841856
0.18471	0.230687	0.00850216
0.18522	0.235918	0.00850259
0.18572	0.241639	0.00851385
0.18623	0.233171	0.00848333
0.18674	0.218672	0.00852351
0.18724	0.225243	0.00860243
0.18775	0.22178	0.00860042
0.18826	0.230395	0.00864207
0.18876	0.233562	0.00857473
0.18927	0.224772	0.00859795
0.18978	0.21201	0.00864661
0.19028	0.213072	0.00868284
0.19079	0.233659	0.00864619
0.1913	0.21337	0.00867054
0.1918	0.217986	0.00871645
0.19231	0.226341	0.00867611
0.19282	0.211963	0.00870537
0.19332	0.208754	0.00871051
0.19383	0.207523	0.00869542
0.19434	0.223433	0.00876584
0.19484	0.210897	0.00872346
0.19535	0.223109	0.0087241
0.19586	0.210081	0.00878745
0.19636	0.197089	0.00875764
0.19687	0.21084	0.00883531
0.19738	0.204099	0.00883127
0.19788	0.211386	0.00873941
0.19839	0.209281	0.0087811
0.1989	0.20331	0.00879021
0.1994	0.207542	0.00882847
0.19991	0.202703	0.0088385
0.20042	0.202957	0.0088252
0.20092	0.204683	0.00881961
0.20143	0.204757	0.00883481
0.20194	0.201773	0.00883186
0.20244	0.199852	0.00885942
0.20295	0.198761	0.00883331
0.20346	0.193808	0.00887709
0.20396	0.205578	0.0088421
0.20447	0.207821	0.00887028
0.20498	0.201233	0.00885525
0.20548	0.204638	0.00885307
0.20599	0.194716	0.00886722
0.2065	0.193212	0.00885636
0.207	0.192	0.00884438
0.20751	0.191348	0.00878138
0.20802	0.195319	0.00878377
0.20852	0.187681	0.00870193
0.20903	0.180087	0.00876576
0.20954	0.194909	0.00880495
0.21004	0.192335	0.00879392
0.21055	0.186867	0.00878393
0.21106	0.189697	0.00881305
0.21156	0.185807	0.00882094
0.21207	0.187203	0.00879946
0.21258	0.199009	0.0087333
0.21308	0.186483	0.00876744
0.21359	0.17933	0.00880326
0.2141	0.177626	0.00878163
0.2146	0.184664	0.00873942
0.21511	0.181923	0.00876228
0.21562	0.190436	0.00874224
0.21612	0.186791	0.00871057
0.21663	0.182527	0.00873153
0.21714	0.187888	0.00871104
0.21764	0.175984	0.00865806
0.21815	0.186158	0.00869751
0.21866	0.191943	0.00868455
0.21916	0.181009	0.00868771
0.21967	0.178397	0.00865452
0.22018	0.171152	0.0086094
0.22068	0.178012	0.00860812
0.22119	0.166018	0.00860702
0.2217	0.180818	0.00859743
0.2222	0.176126	0.00855089
0.22271	0.161415	0.00856639
0.22322	0.177722	0.00854043
0.22372	0.176265	0.00852963
0.22423	0.174926	0.00848351
0.22474	0.165694	0.00845028
0.22524	0.16813	0.00844844
0.22575	0.165704	0.00846162
0.22626	0.171882	0.00842116
0.22676	0.174665	0.00838221
0.22727	0.165001	0.00830397
0.22778	0.170608	0.00834682
0.22828	0.167323	0.00830938
0.22879	0.165272	0.00830542
0.2293	0.16819	0.00827945
0.2298	0.166791	0.00823467
0.23031	0.169435	0.00824582
0.23082	0.163837	0.00827243
0.23132	0.172607	0.00820205
0.23183	0.170318	0.00815651
0.23234	0.15733	0.00811004
0.23284	0.154419	0.00808305
0.23335	0.166876	0.00802105
0.23386	0.164693	0.00798456
0.23436	0.170402	0.00801117
0.23487	0.157924	0.00798694
0.23538	0.173194	0.00796682
0.23588	0.170498	0.0079973
0.23639	0.158033	0.0080173
0.2369	0.158926	0.007888
0.2374	0.170565	0.00792366
0.23791	0.158656	0.00790378
0.23842	0.155615	0.00793498
0.23892	0.168797	0.00785406
0.23943	0.157364	0.00784153
0.23994	0.150503	0.00789013
0.24044	0.151029	0.00784596
0.24095	0.160661	0.0078145
0.24145	0.159077	0.00781697
0.24196	0.162381	0.00775304
0.24247	0.151267	0.00774926
0.24297	0.151166	0.00776794
0.24348	0.154256	0.00774146
0.24399	0.152331	0.00767555
0.24449	0.159572	0.007719
0.245	0.158514	0.00767924
0.24551	0.153451	0.00766808
0.24601	0.154846	0.0076175
0.24652	0.144774	0.00768241
0.24703	0.145005	0.00767751
0.24753	0.151151	0.00760329
0.24804	0.158453	0.00762821
0.24855	0.154301	0.00759425
0.24905	0.153608	0.00756326
0.24956	0.1495	0.0075702
0.25007	0.143038	0.00756584
0.25057	0.145285	0.00754829
0.25108	0.157741	0.00745961
0.25159	0.143349	0.0075051
0.25209	0.148926	0.00749384
0.2526	0.144717	0.00748359
0.25311	0.138814	0.00743006
0.25361	0.141888	0.00743282
0.25412	0.153849	0.00740193
0.25463	0.140704	0.00739271
0.25513	0.154174	0.0074131
0.25564	0.138811	0.00738094
0.25615	0.145609	0.00732146
0.25665	0.139781	0.00737155
0.25716	0.137028	0.00734273
0.25767	0.137262	0.0072894
0.25817	0.145657	0.00722451
0.25868	0.151694	0.00721128
0.25919	0.146881	0.00720884
0.25969	0.140312	0.00719418
0.2602	0.138512	0.007184
0.26071	0.140614	0.00717798
0.26121	0.140954	0.00719056
0.26172	0.141708	0.00716489
0.26223	0.14416	0.00716498
0.26273	0.139702	0.00717734
0.26324	0.141655	0.00713293
0.26375	0.143261	0.00709415
0.26425	0.142037	0.00715309
0.26476	0.14897	0.00713531
0.26527	0.132858	0.00708904
0.26577	0.136484	0.00706248
0.26628	0.133008	0.00708582
0.26679	0.141385	0.00706102
0.26729	0.135866	0.00703051
0.2678	0.129321	0.00705294
0.26831	0.128879	0.00702137
0.26881	0.129914	0.00703015
0.26932	0.13278	0.00700451
0.26983	0.140784	0.00702451
0.27033	0.132684	0.00698255
0.27084	0.138105	0.00698125
0.27134	0.127811	0.0069913
0.27185	0.124519	0.00694495
0.27236	0.12817	0.00692858
0.27286	0.130391	0.00693132
0.27337	0.127691	0.00695164
0.27388	0.128622	0.00692391
0.27438	0.143076	0.00690804
0.27489	0.131854	0.00690998
0.2754	0.136183	0.00688018
0.2759	0.121926	0.00686028
0.27641	0.130558	0.00687287
0.27692	0.128456	0.0068559
0.27742	0.13127	0.00682108
0.27793	0.133758	0.00684218
0.27844	0.130751	0.00685281
0.27894	0.126947	0.00685131
0.27945	0.135272	0.00681733
0.27996	0.127822	0.00682436
0.28046	0.132762	0.00683404
0.28097	0.120998	0.00679244
0.28148	0.116975	0.00682171
0.28198	0.124116	0.00680041
0.28249	0.132138	0.00680927
0.283	0.129865	0.00680315
0.2835	0.119481	0.00676485
0.28401	0.127909	0.00676765
0.28452	0.122848	0.00668624
0.28502	0.125108	0.00671432
0.28553	0.130187	0.00675476
0.28604	0.125493	0.00672346
0.28654	0.121077	0.00672077
0.28705	0.127542	0.00675033
0.28756	0.122275	0.00674322
0.28806	0.115526	0.00671322
0.28857	0.121757	0.00672876
0.28908	0.124978	0.00673681
0.28958	0.123733	0.00673639
0.29009	0.123428	0.00672804
0.29059	0.122646	0.00675864
0.2911	0.122097	0.00676279
0.29161	0.130564	0.00673985
0.29211	0.128259	0.00674408
0.29262	0.118105	0.00675996
0.29313	0.121998	0.0067879
0.29363	0.117009	0.00677264
0.29414	0.118399	0.00676959
0.29465	0.126273	0.00676313
0.29515	0.123676	0.00676551
0.29566	0.120361	0.00675856
0.29617	0.117687	0.0067722
0.29667	0.113582	0.00674178
0.29718	0.116836	0.00673016
0.29769	0.122276	0.00676477
0.29819	0.110254	0.00673335
0.2987	0.116289	0.0066916
0.29921	0.112989	0.00675204
0.29971	0.11741	0.00671707
0.30022	0.116166	0.00673817
0.30073	0.113066	0.00669502
0.30123	0.121536	0.00667789
0.30174	0.116389	0.00674162
0.30225	0.121921	0.00669232
0.30275	0.110148	0.00666186
0.30326	0.120359	0.00667181
0.30377	0.121248	0.00663321
0.30427	0.119992	0.00665691
0.30478	0.114062	0.0066412
0.30529	0.109631	0.0066154
0.30579	0.114475	0.00660144
0.3063	0.112033	0.00657449
0.3068	0.111848	0.0065611
0.30731	0.115794	0.00657813
0.30782	0.110337	0.00656374
0.30832	0.108891	0.0065467
0.30883	0.125145	0.00653872
0.30934	0.11639	0.00655123
0.30984	0.111124	0.00664216
0.31035	0.115571	0.00669806
0.31086	0.113029	0.00678934
0.31136	0.103512	0.00681319
0.31187	0.112355	0.00683932
0.31238	0.115358	0.00689166
0.31288	0.10361	0.00692566
0.31339	0.105064	0.00693105
0.3139	0.108402	0.00695967
0.3144	0.112238	0.00700505
0.31491	0.095299	0.00703093
0.31542	0.114759	0.00705447
0.31592	0.109737	0.00706199
0.31643	0.102866	0.00711401
0.31694	0.103103	0.00713511
0.31744	0.0995456	0.00711973
0.31795	0.105736	0.00719121
0.31845	0.105967	0.00716767
0.31896	0.107415	0.00716791
0.31947	0.101377	0.00718646
0.31997	0.107653	0.00713802
0.32048	0.106294	0.00719102
0.32099	0.108089	0.00717007
0.32149	0.106089	0.00718803
0.322	0.110527	0.00716755
0.32251	0.116596	0.00719256
0.32301	0.0970223	0.00717292
0.32352	0.107459	0.00715821
0.32403	0.102533	0.00718784
0.32453	0.104057	0.00715848
0.32504	0.0990213	0.00721465
0.32555	0.0893918	0.00717098
0.32605	0.0991682	0.00718582
0.32656	0.108458	0.00718001
0.32707	0.107065	0.0071777
0.32757	0.0995513	0.00719823
0.32808	0.107007	0.00718601
0.32859	0.100266	0.00719854
0.32909	0.103221	0.00720249
0.3296	0.107745	0.00723847
0.3301	0.103714	0.00723539
0.33061	0.0928636	0.00722342
0.33112	0.104568	0.00725206
0.33162	0.0973305	0.00724555
0.33213	0.10057	0.00725579
0.33264	0.101613	0.00727206
0.33314	0.0994064	0.00731486
0.33365	0.0986836	0.00725206
0.33416	0.106482	0.00730393
0.33466	0.103472	0.00729921
0.33517	0.0909969	0.00730085
0.33568	0.0977354	0.0073146
0.33618	0.0970372	0.00731533
0.33669	0.104755	0.00731779
0.3372	0.100966	0.00732033
0.3377	0.100165	0.0072878
0.33821	0.0969418	0.00736232
0.33872	0.0973521	0.00734185
0.33922	0.100553	0.0073921
0.33973	0.0966962	0.00736261
0.34023	0.0918346	0.00737211
0.34074	0.0956882	0.00735538
0.34125	0.102234	0.00738348
0.34175	0.0995395	0.00738967
0.34226	0.102631	0.00736318
0.34277	0.0859687	0.00740549
0.34327	0.0921249	0.007345
0.34378	0.0945144	0.00742461
0.34429	0.102643	0.00736894
0.34479	0.0923259	0.00741432
0.3453	0.0997595	0.00741371
0.34581	0.0786041	0.00740617
0.34631	0.0920205	0.00743934
0.34682	0.102405	0.00743206
0.34733	0.0945236	0.00743951
0.34783	0.100569	0.00747403
0.34834	0.0976628	0.00744598
0.34884	0.0949785	0.0074918
0.34935	0.0998813	0.00746902
0.34986	0.0902877	0.00751798
0.35036	0.0938708	0.00749161
0.35087	0.100582	0.00747488
0.35138	0.0895687	0.00747152
0.35188	0.106841	0.00744605
0.35239	0.0999256	0.00746611
0.3529	0.0987403	0.00742551
0.3534	0.0855969	0.00740526
0.35391	0.0908521	0.0072641
0.35442	0.0970933	0.00723214
0.35492	0.0893087	0.00715565
0.35543	0.101694	0.00714354
0.35594	0.0933638	0.00706805
0.35644	0.0918382	0.00701333
0.35695	0.089611	0.00700439
0.35745	0.0917951	0.00706493
0.35796	0.0811531	0.00712806
0.35847	0.0931115	0.00715802
0.35897	0.097959	0.0071568
0.35948	0.0834944	0.00715747
0.35999	0.0828064	0.00714314
0.36049	0.0954682	0.00717861
0.361	0.0944436	0.00718149
0.36151	0.0862782	0.00716904
0.36201	0.0928028	0.00718026
0.36252	0.0862128	0.00722173
0.36303	0.0885792	0.00716943
0.36353	0.0865064	0.00725244
0.36404	0.0857797	0.00724855
0.36455	0.0935113	0.00725736
0.36505	0.0837074	0.00728048
0.36556	0.0941977	0.00729292
0.36606	0.0910938	0.00734793
0.36657	0.0871913	0.00732652
0.36708	0.0920931	0.00734659
0.36758	0.0815533	0.0073707
0.36809	0.0888359	0.00745473
0.3686	0.0871567	0.00754877
0.3691	0.0879633	0.00762472
0.36961	0.0847121	0.00762833
0.37012	0.0844464	0.00763707
0.37062	0.0794379	0.00766495
0.37113	0.0919049	0.00773757
0.37164	0.0828369	0.00771107
0.37214	0.0839651	0.00762443
0.37265	0.0768477	0.0076808
0.37315	0.0914103	0.00772007
0.37366	0.0810205	0.00771069
0.37417	0.0905869	0.00776658
0.37467	0.0769638	0.00777879
0.37518	0.0786672	0.00780943
0.37569	0.0811882	0.00788025
0.37619	0.0929282	0.00788163
0.3767	0.0884792	0.00789562
0.37721	0.0800013	0.00794202
0.37771	0.0872605	0.00795863
0.37822	0.0841203	0.00802315
0.37873	0.0768818	0.00804275
0.37923	0.0743082	0.00807665
0.37974	0.0888785	0.00811152
0.38024	0.0724908	0.00816112
0.38075	0.0894333	0.00818834
0.38126	0.0722638	0.00823613
0.38176	0.0818067	0.00822769
0.38227	0.0841369	0.00831671
0.38278	0.0942962	0.00833915
0.38328	0.0781841	0.0083492
0.38379	0.0746585	0.00839051
0.3843	0.0746736	0.00841516
0.3848	0.0902662	0.00851105
0.38531	0.0829685	0.00845985
0.38582	0.0893092	0.00851753
0.38632	0.0760797	0.00855074
0.38683	0.0730992	0.00852113
0.38733	0.0771621	0.00859373
0.38784	0.0863438	0.00866568
0.38835	0.0723344	0.00869752
0.38885	0.0821844	0.00871843
0.38936	0.0826592	0.00877861
0.38987	0.0771341	0.00882376
0.39037	0.0728451	0.00889717
0.39088	0.0820621	0.00879756
0.39139	0.0745444	0.00896574
0.39189	0.0846246	0.00896974
0.3924	0.0851405	0.008975
0.3929	0.0702495	0.00901276
0.39341	0.0742259	0.00911281
0.39392	0.0894159	0.00915971
0.39442	0.0756644	0.00969924
0.39493	0.0831992	0.00920437
0.39544	0.0771577	0.00930696
0.39594	0.0772992	0.00924218
0.39645	0.0744246	0.00931355
0.39696	0.0735021	0.00938538
0.39746	0.0766064	0.0093958
0.39797	0.0737151	0.00938436
0.39847	0.0776595	0.00955148
0.39898	0.0737923	0.0095336
0.39949	0.0827	0.0095156
0.39999	0.0798618	0.00952385
0.4005	0.0697497	0.00966665
0.40101	0.0719223	0.00964515
0.40151	0.0795723	0.00965746
0.40202	0.0830421	0.00978283
0.40253	0.0912733	0.00974769
0.40303	0.0812992	0.00972201
0.40354	0.0768121	0.00981633
0.40405	0.0938379	0.00984778
0.40455	0.0743105	0.00989692
0.40506	0.0721526	0.00987973
0.40556	0.0860013	0.00993519
0.40607	0.076539	0.00994259
0.40658	0.0744213	0.00996113
0.40708	0.0642662	0.0100505
0.40759	0.0575874	0.0101208
0.4081	0.0839564	0.0100619
0.4086	0.0664121	0.0101153
0.40911	0.0808062	0.0101105
0.40962	0.0608077	0.0101576
0.41012	0.0598882	0.0101563
0.41063	0.0889687	0.0101589
0.41113	0.0857933	0.0102433
0.41164	0.0708377	0.0100784
0.41215	0.0717651	0.0101363
0.41265	0.0739526	0.0102897
0.41316	0.0648805	0.0101854
0.41367	0.0776803	0.010201
0.41417	0.0661608	0.0103403
0.41468	0.0781292	0.0103777
0.41518	0.0774736	0.0103001
0.41569	0.0776038	0.0103368
0.4162	0.0736472	0.0103954
0.4167	0.0759528	0.0104997
0.41721	0.0698887	0.0104492
0.41772	0.0799413	0.0105198
0.41822	0.0915815	0.0105577
0.41873	0.0791051	0.0105511
0.41924	0.0677705	0.0106014
0.41974	0.0629367	0.0107056
0.42025	0.0721003	0.0107759
0.42075	0.06789	0.0107864
0.42126	0.0693069	0.0107801
0.42177	0.0836915	0.0108817
0.42227	0.0719651	0.010995
0.42278	0.0722949	0.0109876
0.42329	0.0700585	0.0111109
0.42379	0.0688674	0.0112619
0.4243	0.0643672	0.0112056
0.42481	0.0762105	0.011269
0.42531	0.0707641	0.0113895
0.42582	0.0573559	0.0115183
0.42632	0.0760049	0.0115454
0.42683	0.0638972	0.0116136
0.42734	0.0825095	0.0117109
0.42784	0.0750815	0.0116848
0.42835	0.0567823	0.0118104
0.42886	0.0825633	0.012021
0.42936	0.0605205	0.0121432
0.42987	0.0872695	0.0120855
0.43037	0.0747441	0.0122857
0.43088	0.0671136	0.0122821
0.43139	0.0577749	0.0123726
0.43189	0.0755215	0.0124274
0.4324	0.0786062	0.012559
0.43291	0.0780851	0.0128408
0.43341	0.0754923	0.0126557
0.43392	0.0498136	0.0128503
0.43443	0.0717772	0.0129972
0.43493	0.0656472	0.0132554
0.43544	0.0622049	0.0131947
0.43594	0.0514859	0.0132371
0.43645	0.0797572	0.0133753
0.43696	0.0588341	0.0134574
0.43746	0.0611759	0.0134948
0.43797	0.0732292	0.0137093
0.43848	0.0620551	0.0137871
0.43898	0.0783536	0.0137971
0.43949	0.0783605	0.0140453
0.43999	0.06873	0.0141562

## Sheet: AavLEA1_20T Fit_4
#q**2_data	ln(I(q))_data	error_data	q**2_fit	ln(I(q))_fit	normalized_residual
0.00012996	1.9246	0.946151	0.00034225	1.55697	0.914529
0.000141848	1.98134	0.798448	0.000361	1.54645	0.155026
0.000154256	1.88757	0.692355	0.00038064	1.53543	0.771103
0.000166926	1.83961	0.396832	0.0004008	1.52411	0.445675
0.000180365	1.87063	0.319706	0.00042107	1.51274	-0.0212643
0.000194324	1.84434	0.251026	0.000442261	1.50084	0.323467
0.000208514	1.82207	0.175101	0.000463972	1.48866	-0.0509631
0.000223502	1.76812	0.167065	0.000485762	1.47643	0.0341511
0.000239012	1.73728	0.137916	0.000508503	1.46367	-1.18279
0.000254722	1.66411	0.110466	0.000531764	1.45061	-0.93034
0.000271261	1.63999	0.0887049	0.000555074	1.43753	-0.422538
0.00028832	1.63447	0.077886	0.000579365	1.42389	0.535099
0.00030555	1.63147	0.0652071	0.000604176	1.40997	-0.233544
0.00032364	1.60272	0.0517452	0.000629508	1.39575	0.668101
0.00034225	1.59679	0.0435407	0.000654848	1.38153	0.0176158
0.000361	1.55264	0.039916	0.00068121	1.36673	-0.715644
0.00038064	1.56139	0.0336676	0.000708092	1.35165	0.767681
0.0004008	1.53741	0.0298324
0.00042107	1.5122	0.0251115
0.000442261	1.50824	0.022878
0.000463972	1.4877	0.0187503
0.000485762	1.47701	0.0169918
0.000508503	1.44458	0.0161342
0.000531764	1.43726	0.0143483
0.000555074	1.43194	0.0132339
0.000579365	1.43033	0.012034
0.000604176	1.40723	0.0117351
0.000629508	1.40322	0.0111775
0.000654848	1.38171	0.0102621
0.00068121	1.35955	0.0100441
0.000708092	1.35902	0.00960075
0.000734952	1.33379	0.00928638
0.000762864	1.32386	0.00900685
0.000791297	1.30423	0.00898314

## Sheet: AavLEA1_20S_4
Q	I(Q)	Error
0.0114	5.06051	6.47927
0.01191	4.95986	5.77831
0.01242	4.40524	4.57602
0.01292	4.00748	2.49246
0.01343	3.88176	2.0746
0.01394	3.6487	1.59075
0.01444	3.66482	1.08706
0.01495	3.71399	0.97917
0.01546	3.32297	0.784612
0.01596	3.35247	0.584221
0.01647	3.00161	0.454768
0.01698	3.08331	0.397058
0.01748	3.04002	0.33359
0.01799	2.9261	0.257196
0.0185	2.89558	0.215279
0.019	2.78364	0.187396
0.01951	2.77235	0.159574
0.02002	2.6595	0.137976
0.02052	2.65409	0.114541
0.02103	2.62773	0.102542
0.02154	2.64308	0.0822622
0.02204	2.54944	0.0732515
0.02255	2.52342	0.0675401
0.02306	2.44957	0.0596006
0.02356	2.47143	0.0547694
0.02407	2.41275	0.0499093
0.02458	2.31124	0.047166
0.02509	2.32666	0.0438432
0.02559	2.30215	0.040276
0.0261	2.26307	0.0381588
0.02661	2.22528	0.0367089
0.02711	2.2171	0.0341185
0.02762	2.16973	0.0331012
0.02813	2.16654	0.0321433
0.02863	2.14542	0.0310808
0.02914	2.07682	0.0310419
0.02965	2.0574	0.030583
0.03015	2.04364	0.0296434
0.03066	2.02133	0.0296332
0.03117	1.96931	0.0283244
0.03167	1.96534	0.0283458
0.03218	1.89984	0.0286015
0.03269	1.88574	0.0278365
0.03319	1.87223	0.0275442
0.0337	1.83331	0.0267373
0.03421	1.78185	0.0265159
0.03471	1.76335	0.026228
0.03522	1.74023	0.0261811
0.03573	1.73878	0.0256376
0.03623	1.6837	0.0253587
0.03674	1.6736	0.0253276
0.03725	1.63405	0.0249432
0.03775	1.61103	0.0245396
0.03826	1.58006	0.0241401
0.03877	1.54506	0.0237915
0.03927	1.52728	0.0236169
0.03978	1.53374	0.0231936
0.04029	1.48212	0.0230965
0.0408	1.48339	0.0228363
0.0413	1.42955	0.0223458
0.04181	1.41463	0.0226647
0.04232	1.39835	0.0221934
0.04282	1.37956	0.0221281
0.04333	1.35953	0.0217133
0.04384	1.34395	0.0217044
0.04434	1.327	0.0216752
0.04485	1.32325	0.0212517
0.04536	1.27116	0.0211514
0.04586	1.26207	0.0204643
0.04637	1.22406	0.0208343
0.04688	1.21389	0.0205448
0.04738	1.1925	0.0202785
0.04789	1.18305	0.0201123
0.0484	1.17383	0.0198685
0.0489	1.15893	0.020015
0.04941	1.14636	0.0197841
0.04992	1.12062	0.0193083
0.05042	1.08033	0.0188982
0.05093	1.09542	0.0189988
0.05144	1.07482	0.0188457
0.05194	1.0766	0.0184627
0.05245	1.05386	0.0184481
0.05296	1.03115	0.0181172
0.05346	1.01618	0.0181419
0.05397	0.996465	0.0180877
0.05448	0.972835	0.0179283
0.05498	0.958447	0.0179864
0.05549	0.955321	0.0175868
0.056	0.930281	0.0177127
0.0565	0.913954	0.017614
0.05701	0.929535	0.017303
0.05752	0.905509	0.0174159
0.05803	0.858171	0.0170469
0.05853	0.861205	0.0169596
0.05904	0.860646	0.0170357
0.05955	0.858649	0.0168443
0.06005	0.828719	0.0166305
0.06056	0.819103	0.0166406
0.06107	0.829703	0.016627
0.06157	0.814665	0.016416
0.06208	0.79677	0.0163449
0.06259	0.771702	0.016147
0.06309	0.751688	0.0162108
0.0636	0.751545	0.0161225
0.06411	0.738105	0.0159146
0.06461	0.749181	0.0159208
0.06512	0.72776	0.0156338
0.06563	0.715479	0.0156078
0.06613	0.701405	0.0156036
0.06664	0.692135	0.0154749
0.06715	0.673059	0.015349
0.06765	0.691328	0.0152009
0.06816	0.67768	0.0152893
0.06867	0.666596	0.0150316
0.06917	0.66104	0.0151002
0.06968	0.643345	0.0150483
0.07019	0.640145	0.0147989
0.07069	0.642842	0.0148165
0.0712	0.615376	0.0148052
0.07171	0.619327	0.014625
0.07221	0.61026	0.0145837
0.07272	0.600309	0.0144499
0.07323	0.580614	0.0146091
0.07373	0.583692	0.0142653
0.07424	0.58268	0.0142326
0.07475	0.585482	0.0141257
0.07526	0.579291	0.0142305
0.07576	0.582845	0.0141079
0.07627	0.549263	0.0140144
0.07678	0.564189	0.0139687
0.07728	0.555272	0.0136085
0.07779	0.536189	0.0136771
0.0783	0.529398	0.0135915
0.0788	0.529432	0.0135706
0.07931	0.519751	0.0134727
0.07982	0.511418	0.0132961
0.08032	0.513548	0.0136018
0.08083	0.508378	0.0136101
0.08134	0.514964	0.0136724
0.08184	0.490027	0.0137441
0.08235	0.505541	0.0135859
0.08286	0.481845	0.0136883
0.08336	0.481702	0.013751
0.08387	0.472166	0.0137795
0.08438	0.456323	0.0136067
0.08488	0.462253	0.0135569
0.08539	0.447953	0.0136642
0.0859	0.443439	0.0136412
0.0864	0.464954	0.0137053
0.08691	0.444326	0.0135276
0.08742	0.431874	0.0135444
0.08792	0.440992	0.0135077
0.08843	0.426886	0.0135922
0.08894	0.424106	0.0136141
0.08944	0.405506	0.0134789
0.08995	0.408401	0.0136862
0.09046	0.437187	0.0139256
0.09096	0.420823	0.0138733
0.09147	0.393937	0.0138392
0.09198	0.398381	0.0138242
0.09248	0.39624	0.013666
0.09299	0.394032	0.0136237
0.0935	0.401501	0.013423
0.09401	0.390633	0.0134271
0.09451	0.400175	0.0134036
0.09502	0.388614	0.013329
0.09553	0.373667	0.0133261
0.09603	0.377525	0.0133175
0.09654	0.373867	0.0131174
0.09705	0.382578	0.0130877
0.09755	0.377725	0.0131759
0.09806	0.366226	0.0131043
0.09857	0.370509	0.299278
0.09907	0.343759	0.0130748
0.09958	0.356408	0.0129953
0.10009	0.342648	0.0129688
0.10059	0.341415	0.0128918
0.1011	0.347043	0.0128102
0.10161	0.333521	0.0124404
0.10211	0.322751	0.0123284
0.10262	0.329823	0.0123223
0.10313	0.331352	0.0123982
0.10363	0.316869	0.0125231
0.10414	0.335737	0.0125293
0.10465	0.338096	0.0125676
0.10515	0.318507	0.012635
0.10566	0.325378	0.0124591
0.10617	0.316676	0.012278
0.10667	0.305224	0.0121564
0.10718	0.300922	0.0121185
0.10769	0.325528	0.0120482
0.10819	0.311342	0.0119314
0.1087	0.292893	0.0117588
0.10921	0.285533	0.0116596
0.10971	0.289929	0.0117694
0.11022	0.286288	0.0116748
0.11073	0.297268	0.0115957
0.11123	0.287928	0.0114293
0.11174	0.298555	0.011534
0.11225	0.278777	0.0114941
0.11275	0.282466	0.0113978
0.11326	0.285705	0.0114074
0.11377	0.279179	0.0111878
0.11428	0.286892	0.0112933
0.11478	0.287053	0.0111736
0.11529	0.272064	0.0111084
0.1158	0.271241	0.0110519
0.1163	0.266695	0.0109645
0.11681	0.27381	0.0110206
0.11732	0.251751	0.0109265
0.11782	0.261567	0.0108709
0.11833	0.242687	0.010724
0.11884	0.247375	0.0107659
0.11934	0.25463	0.0107136
0.11985	0.257821	0.010691
0.12036	0.232184	0.0106402
0.12086	0.245713	0.0105567
0.12137	0.253766	0.0105411
0.12188	0.243715	0.0105672
0.12238	0.238477	0.0104818
0.12289	0.247319	0.0104044
0.1234	0.217668	0.0103613
0.1239	0.242349	0.0103917
0.12441	0.233328	0.0103636
0.12492	0.242756	0.0102681
0.12542	0.230336	0.0102558
0.12593	0.238789	0.0101406
0.12644	0.230613	0.010176
0.12694	0.245883	0.0101789
0.12745	0.235989	0.0101012
0.12796	0.227807	0.00995594
0.12846	0.229155	0.00992495
0.12897	0.228982	0.00988542
0.12948	0.223255	0.00993364
0.12998	0.222029	0.00992611
0.13049	0.232017	0.00979369
0.131	0.225378	0.00972596
0.1315	0.205923	0.00966924
0.13201	0.213472	0.0095502
0.13252	0.209321	0.00964833
0.13302	0.212088	0.00960221
0.13353	0.209496	0.00953741
0.13404	0.205537	0.00958574
0.13454	0.207652	0.00954036
0.13505	0.209778	0.00953952
0.13556	0.199362	0.00943942
0.13606	0.211861	0.00949394
0.13657	0.201042	0.00948255
0.13708	0.207194	0.00941567
0.13758	0.197405	0.00932121
0.13809	0.206816	0.00937903
0.1386	0.195347	0.0093374
0.13911	0.192912	0.00924995
0.13961	0.194852	0.00925808
0.14012	0.193177	0.00922655
0.14063	0.192015	0.00918481
0.14113	0.202194	0.00924952
0.14164	0.197386	0.00920608
0.14215	0.180455	0.00915259
0.14265	0.190775	0.00909005
0.14316	0.193431	0.00913331
0.14367	0.185563	0.00911376
0.14417	0.187699	0.00904897
0.14468	0.180293	0.00904157
0.14519	0.185605	0.00897685
0.14569	0.183543	0.00895051
0.1462	0.186283	0.00899539
0.14671	0.187212	0.00901386
0.14721	0.17667	0.0089463
0.14772	0.182337	0.00889655
0.14823	0.16758	0.00890822
0.14873	0.173374	0.0088969
0.14924	0.169882	0.00884539
0.14975	0.179445	0.00881751
0.15025	0.172352	0.00883728
0.15076	0.164851	0.00878766
0.15127	0.165158	0.00878071
0.15177	0.173736	0.00873538
0.15228	0.172814	0.00871994
0.15279	0.170458	0.00871573
0.15329	0.155064	0.00873002
0.1538	0.170689	0.00871355
0.15431	0.157814	0.00861408
0.15481	0.17235	0.00860088
0.15532	0.17116	0.0086952
0.15583	0.163488	0.00851977
0.15633	0.155704	0.00851734
0.15684	0.158434	0.00850705
0.15735	0.146727	0.00845893
0.15785	0.158902	0.00845707
0.15836	0.150943	0.00853078
0.15887	0.160899	0.00847876
0.15937	0.156839	0.0084247
0.15988	0.148062	0.00836598
0.16039	0.15326	0.00839781
0.16089	0.152033	0.00842675
0.1614	0.140738	0.0083536
0.16191	0.139481	0.00833004
0.16241	0.149797	0.0083672
0.16292	0.146103	0.0083202
0.16343	0.153378	0.00830504
0.16393	0.141088	0.00831605
0.16444	0.142707	0.00823755
0.16495	0.142927	0.00823634
0.16545	0.148459	0.00824501
0.16596	0.149337	0.00822256
0.16647	0.135083	0.0082425
0.16697	0.136725	0.00815024
0.16748	0.131934	0.00817496
0.16799	0.135181	0.0081831
0.16849	0.131765	0.00805738
0.169	0.147139	0.0081748
0.16951	0.140104	0.00820417
0.17001	0.136933	0.00822742
0.17052	0.128494	0.00829256
0.17103	0.128537	0.00833461
0.17153	0.128633	0.00824923
0.17204	0.135883	0.00830563
0.17255	0.135185	0.00834404
0.17305	0.13445	0.00835089
0.17356	0.127152	0.00835579
0.17407	0.133668	0.00827767
0.17457	0.13499	0.00833991
0.17508	0.121207	0.00833602
0.17559	0.127541	0.00835777
0.1761	0.125048	0.00839406
0.1766	0.131346	0.00830249
0.17711	0.128917	0.0083218
0.17762	0.123999	0.00834071
0.17812	0.13185	0.00839955
0.17863	0.13066	0.00833441
0.17914	0.135345	0.00832532
0.17964	0.119662	0.00832841
0.18015	0.129039	0.00840944
0.18066	0.122017	0.00849966
0.18116	0.117942	0.00850085
0.18167	0.125999	0.00855721
0.18218	0.131286	0.00848314
0.18268	0.132498	0.00851376
0.18319	0.11918	0.00855621
0.1837	0.130018	0.00859096
0.1842	0.125965	0.0086182
0.18471	0.127191	0.00871714
0.18522	0.106052	0.00868222
0.18572	0.116406	0.00874023
0.18623	0.123905	0.00866375
0.18674	0.120984	0.00873084
0.18724	0.114853	0.00877084
0.18775	0.116587	0.00875631
0.18826	0.115817	0.00883449
0.18876	0.120358	0.00879991
0.18927	0.110611	0.00879157
0.18978	0.11563	0.00883308
0.19028	0.111707	0.00888864
0.19079	0.109858	0.0087973
0.1913	0.104384	0.00887657
0.1918	0.109312	0.00892457
0.19231	0.111126	0.00884792
0.19282	0.112144	0.00890203
0.19332	0.111183	0.00891367
0.19383	0.112092	0.00890848
0.19434	0.103418	0.00893943
0.19484	0.109711	0.00895692
0.19535	0.101052	0.00896479
0.19586	0.107296	0.00898989
0.19636	0.102571	0.00895934
0.19687	0.113522	0.00901009
0.19738	0.102321	0.00903529
0.19788	0.123002	0.00896314
0.19839	0.109116	0.00899441
0.1989	0.107736	0.00897853
0.1994	0.12239	0.00903506
0.19991	0.0991651	0.00901171
0.20042	0.110793	0.00902183
0.20092	0.114939	0.00901692
0.20143	0.10547	0.00902696
0.20194	0.113852	0.00906109
0.20244	0.0999644	0.00902375
0.20295	0.105278	0.00905093
0.20346	0.107912	0.00909698
0.20396	0.0989403	0.00904639
0.20447	0.109108	0.00907021
0.20498	0.0999003	0.00907086
0.20548	0.0950179	0.00904879
0.20599	0.10423	0.00907867
0.2065	0.102966	0.00904262
0.207	0.105856	0.00904029
0.20751	0.0926169	0.00899088
0.20802	0.101103	0.00896573
0.20852	0.0951392	0.00892768
0.20903	0.0951615	0.00891545
0.20954	0.0833454	0.00903825
0.21004	0.0901036	0.00896711
0.21055	0.0896733	0.00901167
0.21106	0.093381	0.00905277
0.21156	0.0869615	0.00901577
0.21207	0.0985054	0.00895926
0.21258	0.101379	0.0089289
0.21308	0.0982533	0.00898943
0.21359	0.100735	0.00900994
0.2141	0.0988467	0.0089955
0.2146	0.102356	0.00898846
0.21511	0.0944992	0.0089594
0.21562	0.0916772	0.00894307
0.21612	0.0913997	0.00894141
0.21663	0.107997	0.00896007
0.21714	0.0913762	0.00890886
0.21764	0.0854492	0.00889425
0.21815	0.0913877	0.0089214
0.21866	0.087899	0.00890691
0.21916	0.0900328	0.00889686
0.21967	0.0851354	0.008836
0.22018	0.0884444	0.00880512
0.22068	0.0895813	0.00886831
0.22119	0.0805803	0.00880947
0.2217	0.0851374	0.0087955
0.2222	0.098169	0.00878786
0.22271	0.088701	0.00877741
0.22322	0.0884036	0.00874977
0.22372	0.0819349	0.00875554
0.22423	0.0903526	0.00870178
0.22474	0.0849069	0.00868459
0.22524	0.0766838	0.00864294
0.22575	0.0883549	0.00865508
0.22626	0.0829313	0.00861881
0.22676	0.0902736	0.00864072
0.22727	0.0851987	0.0084992
0.22778	0.0785723	0.00855951
0.22828	0.0867538	0.00852762
0.22879	0.0922867	0.00853314
0.2293	0.0659479	0.00848083
0.2298	0.0761031	0.00844231
0.23031	0.0910779	0.00844589
0.23082	0.0835072	0.00844723
0.23132	0.0877415	0.00839535
0.23183	0.0888438	0.00836578
0.23234	0.0888656	0.00829433
0.23284	0.0840982	0.00826541
0.23335	0.0765369	0.00821078
0.23386	0.0827305	0.00818879
0.23436	0.0733541	0.00819163
0.23487	0.0756956	0.00819611
0.23538	0.077351	0.00816338
0.23588	0.0856031	0.00818136
0.23639	0.0729308	0.00817325
0.2369	0.0701562	0.00809828
0.2374	0.0846385	0.0081544
0.23791	0.0813203	0.00812914
0.23842	0.084089	0.00813411
0.23892	0.0800623	0.00804786
0.23943	0.0790277	0.00804701
0.23994	0.0770562	0.00810035
0.24044	0.0729641	0.0080515
0.24095	0.0873192	0.00800351
0.24145	0.0739995	0.00798942
0.24196	0.0864015	0.0079417
0.24247	0.0808338	0.00795486
0.24297	0.0649523	0.00792624
0.24348	0.0779505	0.00795791
0.24399	0.0770354	0.00788505
0.24449	0.0847562	0.00790135
0.245	0.0712649	0.00790348
0.24551	0.0748092	0.00785348
0.24601	0.0807315	0.00782901
0.24652	0.0739513	0.00785431
0.24703	0.0768603	0.00786218
0.24753	0.0681477	0.00780613
0.24804	0.0726954	0.00780867
0.24855	0.0771297	0.00776609
0.24905	0.0738377	0.00777075
0.24956	0.0670549	0.00777172
0.25007	0.0743269	0.00774928
0.25057	0.0632705	0.00772308
0.25108	0.0700408	0.00766134
0.25159	0.0767874	0.00770548
0.25209	0.0759695	0.00768066
0.2526	0.075189	0.00764402
0.25311	0.0765759	0.00761226
0.25361	0.07311	0.00763273
0.25412	0.0695056	0.00761438
0.25463	0.0655162	0.00756863
0.25513	0.073961	0.00761847
0.25564	0.0629559	0.00760719
0.25615	0.0697015	0.00751407
0.25665	0.0608569	0.00754372
0.25716	0.071179	0.00754136
0.25767	0.0734233	0.00748733
0.25817	0.0765036	0.00743527
0.25868	0.0727115	0.00739705
0.25919	0.0759592	0.00739205
0.25969	0.0722392	0.00737713
0.2602	0.0724636	0.00736597
0.26071	0.0724523	0.00735642
0.26121	0.0564136	0.0073789
0.26172	0.0752977	0.00736969
0.26223	0.0566044	0.00737448
0.26273	0.0557095	0.00735577
0.26324	0.0684064	0.00732822
0.26375	0.0667728	0.00731056
0.26425	0.0644741	0.00730837
0.26476	0.0659544	0.00732282
0.26527	0.0649254	0.00726894
0.26577	0.0636408	0.00726716
0.26628	0.0607541	0.00727132
0.26679	0.0676469	0.00725044
0.26729	0.06314	0.00723091
0.2678	0.0708564	0.00726336
0.26831	0.0769603	0.00720145
0.26881	0.0701656	0.00722403
0.26932	0.0662774	0.00719702
0.26983	0.0660185	0.00720209
0.27033	0.0539608	0.00717876
0.27084	0.0588059	0.00715431
0.27134	0.0608126	0.00719021
0.27185	0.0655482	0.00716369
0.27236	0.0665574	0.00710118
0.27286	0.058101	0.00710453
0.27337	0.0531195	0.00714537
0.27388	0.0683154	0.00710099
0.27438	0.0687515	0.00709689
0.27489	0.06023	0.00708558
0.2754	0.0643721	0.00705116
0.2759	0.0597713	0.00704112
0.27641	0.0698905	0.00705566
0.27692	0.0520054	0.00704309
0.27742	0.0635382	0.00699199
0.27793	0.0521523	0.00703576
0.27844	0.0633136	0.00704314
0.27894	0.0559833	0.00701743
0.27945	0.0573513	0.00698267
0.27996	0.0627895	0.00703849
0.28046	0.0642367	0.00701341
0.28097	0.0677574	0.00697271
0.28148	0.0565997	0.00698007
0.28198	0.0600508	0.00697964
0.28249	0.0617687	0.00699699
0.283	0.0603374	0.00698731
0.2835	0.0642733	0.00694151
0.28401	0.0573418	0.00692332
0.28452	0.0574841	0.00688021
0.28502	0.0565726	0.00690193
0.28553	0.0541956	0.00692017
0.28604	0.0591828	0.00692271
0.28654	0.0546154	0.00692823
0.28705	0.0557164	0.00692255
0.28756	0.0651315	0.00692098
0.28806	0.0562744	0.00692234
0.28857	0.0536285	0.0069242
0.28908	0.0701918	0.00690251
0.28958	0.0515295	0.00691338
0.29009	0.0572146	0.00691528
0.29059	0.0540531	0.00696881
0.2911	0.0548536	0.00693934
0.29161	0.0550423	0.00691714
0.29211	0.0622115	0.00694082
0.29262	0.0573546	0.00697614
0.29313	0.0535479	0.00697648
0.29363	0.0546403	0.00696263
0.29414	0.0448164	0.00694141
0.29465	0.0537279	0.00694288
0.29515	0.0564418	0.00694059
0.29566	0.0516877	0.00695528
0.29617	0.0510379	0.00694561
0.29667	0.0602369	0.00690545
0.29718	0.0495936	0.00690647
0.29769	0.0581456	0.00695976
0.29819	0.0548682	0.00693407
0.2987	0.0634305	0.00685835
0.29921	0.054581	0.00691592
0.29971	0.0452754	0.00689519
0.30022	0.0541808	0.0069132
0.30073	0.0468415	0.00687169
0.30123	0.0601313	0.00686266
0.30174	0.0598985	0.00693037
0.30225	0.0623267	0.00687924
0.30275	0.0490205	0.00685989
0.30326	0.0583472	0.0068611
0.30377	0.0480503	0.0068251
0.30427	0.0484013	0.0068338
0.30478	0.05684	0.00678843
0.30529	0.057201	0.00681359
0.30579	0.0517605	0.00678258
0.3063	0.0578056	0.00674982
0.3068	0.0483821	0.00675518
0.30731	0.0556736	0.00675825
0.30782	0.0563287	0.00671777
0.30832	0.0484879	0.00672827
0.30883	0.0638523	0.0067218
0.30934	0.0542423	0.00674221
0.30984	0.0492915	0.00684414
0.31035	0.0449756	0.00686177
0.31086	0.0488541	0.00695387
0.31136	0.0444841	0.00700924
0.31187	0.0504377	0.00702861
0.31238	0.0537641	0.00708874
0.31288	0.0542021	0.00710862
0.31339	0.0482456	0.00715927
0.3139	0.0493638	0.00713889
0.3144	0.0575549	0.00721106
0.31491	0.0551315	0.00723231
0.31542	0.0550364	0.00724465
0.31592	0.04885	0.00725459
0.31643	0.0501841	0.00729608
0.31694	0.043369	0.00731485
0.31744	0.0502933	0.00733714
0.31795	0.0362595	0.0073802
0.31845	0.0477223	0.00735558
0.31896	0.0656305	0.00735851
0.31947	0.0499279	0.0073947
0.31997	0.0540733	0.00733677
0.32048	0.0477967	0.00739161
0.32099	0.0551941	0.00736977
0.32149	0.0504892	0.0073769
0.322	0.0532546	0.00734324
0.32251	0.0444779	0.00738146
0.32301	0.0516241	0.00735062
0.32352	0.0389597	0.00736493
0.32403	0.0473615	0.00738147
0.32453	0.043929	0.00735924
0.32504	0.0534138	0.00739736
0.32555	0.0460233	0.00733347
0.32605	0.0353195	0.00739579
0.32656	0.0457995	0.00738226
0.32707	0.0466746	0.00736974
0.32757	0.0480897	0.00739531
0.32808	0.0590708	0.00740388
0.32859	0.0484592	0.00742179
0.32909	0.0468218	0.00744234
0.3296	0.0472692	0.00740548
0.3301	0.0416446	0.00744311
0.33061	0.0409492	0.00742623
0.33112	0.0440764	0.00747228
0.33162	0.0467392	0.00744558
0.33213	0.0538931	0.0074802
0.33264	0.0482856	0.00746232
0.33314	0.0452449	0.00752567
0.33365	0.050909	0.00746013
0.33416	0.0438956	0.00750738
0.33466	0.0443228	0.00751356
0.33517	0.0425754	0.00751321
0.33568	0.0437556	0.00752082
0.33618	0.0329374	0.00753669
0.33669	0.0474923	0.00752238
0.3372	0.0459064	0.00761542
0.3377	0.0512062	0.0075118
0.33821	0.0356531	0.00755417
0.33872	0.0422736	0.00756085
0.33922	0.0351238	0.00758341
0.33973	0.0511703	0.00755933
0.34023	0.0437977	0.00756774
0.34074	0.0417836	0.00756615
0.34125	0.0403382	0.00760654
0.34175	0.0467774	0.00761803
0.34226	0.029151	0.00760596
0.34277	0.0305905	0.00760378
0.34327	0.0451918	0.00758087
0.34378	0.033979	0.00760594
0.34429	0.0419464	0.00757514
0.34479	0.0398031	0.00762439
0.3453	0.0397523	0.00760755
0.34581	0.0447138	0.0076231
0.34631	0.0342918	0.00765614
0.34682	0.0415323	0.00760644
0.34733	0.0320787	0.00761805
0.34783	0.0415115	0.00767484
0.34834	0.0373008	0.00765782
0.34884	0.0398954	0.0077222
0.34935	0.0426156	0.00766768
0.34986	0.0396033	0.00771023
0.35036	0.0338277	0.00770625
0.35087	0.037941	0.00766909
0.35138	0.0443823	0.00766573
0.35188	0.0393708	0.00764187
0.35239	0.0355092	0.00767865
0.3529	0.0484923	0.00764972
0.3534	0.0315608	0.00764572
0.35391	0.0359256	0.00745948
0.35442	0.042391	0.00741398
0.35492	0.0447572	0.00735751
0.35543	0.035421	0.00737082
0.35594	0.0394262	0.00724603
0.35644	0.043111	0.00722209
0.35695	0.0396044	0.00720461
0.35745	0.0313674	0.00725632
0.35796	0.0397762	0.00733409
0.35847	0.0425741	0.00735585
0.35897	0.0433236	0.00735568
0.35948	0.0375703	0.00736195
0.35999	0.0333115	0.00737099
0.36049	0.0375487	0.00736367
0.361	0.0347167	0.00739012
0.36151	0.0329918	0.00737447
0.36201	0.0331828	0.00737556
0.36252	0.0336028	0.00743014
0.36303	0.0296438	0.0074042
0.36353	0.0358177	0.00745262
0.36404	0.0472754	0.00743394
0.36455	0.0332318	0.00748095
0.36505	0.0336644	0.00750398
0.36556	0.0442651	0.00750651
0.36606	0.0383867	0.00754251
0.36657	0.0441331	0.00754676
0.36708	0.03576	0.00756925
0.36758	0.0427074	0.00758357
0.36809	0.0328487	0.00765409
0.3686	0.0327064	0.00775732
0.3691	0.0305562	0.00785142
0.36961	0.0272079	0.00783258
0.37012	0.0273774	0.00784452
0.37062	0.0390197	0.00789371
0.37113	0.0474995	0.0079597
0.37164	0.0314903	0.00791153
0.37214	0.0372313	0.00782907
0.37265	0.0293751	0.00790194
0.37315	0.0348859	0.00793694
0.37366	0.0358144	0.00790917
0.37417	0.0411541	0.00796488
0.37467	0.0315213	0.00801722
0.37518	0.0374641	0.00806681
0.37569	0.0411608	0.0081006
0.37619	0.0341159	0.00813049
0.3767	0.0346728	0.0081395
0.37721	0.0441131	0.00815529
0.37771	0.0320433	0.00820049
0.37822	0.0379326	0.00828031
0.37873	0.0440415	0.00828454
0.37923	0.0384574	0.00832412
0.37974	0.0412754	0.00832114
0.38024	0.0241595	0.0084191
0.38075	0.036631	0.0084039
0.38126	0.0438287	0.00845404
0.38176	0.0383397	0.00847641
0.38227	0.0275244	0.00857018
0.38278	0.0496187	0.00855024
0.38328	0.0359146	0.00861341
0.38379	0.0369592	0.00864968
0.3843	0.0336359	0.00866102
0.3848	0.0408446	0.00872558
0.38531	0.0411841	0.00870781
0.38582	0.0387705	0.00875149
0.38632	0.0392146	0.00883345
0.38683	0.0443792	0.00879165
0.38733	0.0318972	0.00885817
0.38784	0.0415615	0.00892657
0.38835	0.03391	0.00895247
0.38885	0.0410031	0.00897797
0.38936	0.027171	0.00901038
0.38987	0.0312795	0.0090333
0.39037	0.0308097	0.00912393
0.39088	0.0321395	0.00907882
0.39139	0.0338603	0.00921215
0.39189	0.0249679	0.00922548
0.3924	0.0336092	0.00922354
0.3929	0.0315031	0.00928745
0.39341	0.0354731	0.00932422
0.39392	0.0380097	0.0093686
0.39442	0.0373956	0.0108207
0.39493	0.0393431	0.00946515
0.39544	0.028999	0.00954341
0.39594	0.0308851	0.00951573
0.39645	0.0386808	0.00956111
0.39696	0.0268187	0.00964753
0.39746	0.0399418	0.00965379
0.39797	0.0299079	0.00969465
0.39847	0.0246464	0.00983327
0.39898	0.0363131	0.00977376
0.39949	0.0303138	0.00980521
0.39999	0.0194754	0.00981042
0.4005	0.0328367	0.00990251
0.40101	0.0275272	0.00994076
0.40151	0.0316297	0.00990852
0.40202	0.0356756	0.0100727
0.40253	0.0438531	0.00997514
0.40303	0.029409	0.0100527
0.40354	0.0283187	0.010115
0.40405	0.0280131	0.0101689
0.40455	0.0359644	0.0101985
0.40506	0.0311944	0.0101998
0.40556	0.0416036	0.0102422
0.40607	0.0326215	0.0102192
0.40658	0.0269733	0.0102726
0.40708	0.0377121	0.0103435
0.40759	0.026671	0.0104305
0.4081	0.0406085	0.0103789
0.4086	0.0353608	0.0103961
0.40911	0.0338551	0.010423
0.40962	0.025761	0.0104609
0.41012	0.0262146	0.0103791
0.41063	0.0108156	0.0104843
0.41113	0.0179446	0.0105408
0.41164	0.038099	0.0104048
0.41215	0.0283156	0.0104358
0.41265	0.0248787	0.0104772
0.41316	0.0194131	0.0104883
0.41367	0.0289615	0.0104967
0.41417	0.0247436	0.010545
0.41468	0.0338574	0.0106537
0.41518	0.0122341	0.0105823
0.41569	0.0455028	0.0106439
0.4162	0.0395669	0.0106882
0.4167	0.0400256	0.0108088
0.41721	0.0278815	0.0107956
0.41772	0.0397682	0.0108066
0.41822	0.0309426	0.0108484
0.41873	0.0258559	0.0108821
0.41924	0.0124046	0.0108774
0.41974	0.0134377	0.0110229
0.42025	0.0204182	0.0110721
0.42075	0.0292451	0.0110989
0.42126	0.0203167	0.0110433
0.42177	0.0179636	0.011226
0.42227	0.00761103	0.0113675
0.42278	0.027699	0.0113139
0.42329	0.0305744	0.0113904
0.42379	0.0269682	0.0115666
0.4243	0.0227249	0.0115027
0.42481	0.035079	0.0115587
0.42531	0.0192995	0.0116942
0.42582	0.03535	0.0118509
0.42632	0.0266203	0.0118231
0.42683	0.0362762	0.0119349
0.42734	0.0247933	0.0120769
0.42784	0.0227346	0.0120183
0.42835	0.0339846	0.0122672
0.42886	0.031891	0.0122448
0.42936	0.0370979	0.0124677
0.42987	0.0390892	0.0123332
0.43037	0.0303228	0.0125363
0.43088	0.0180505	0.0125287
0.43139	0.0248218	0.0127055
0.43189	0.0225	0.0127802
0.4324	0.0244241	0.0129385
0.43291	0.00886077	0.0131652
0.43341	0.0189044	0.0130678
0.43392	0.0273021	0.0132305
0.43443	0.0330103	0.0134421
0.43493	0.0134028	0.013541
0.43544	0.0255959	0.0134757
0.43594	-0.00447	0.0137035
0.43645	0.0315477	0.01374
0.43696	0.0251431	0.0138291
0.43746	0.00980872	0.0139255
0.43797	0.0162133	0.0140546
0.43848	0.0217421	0.0141535
0.43898	0.0308269	0.0142535
0.43949	0.033589	0.0144948
0.43999	0.0129851	0.0144586

## Sheet: AavLEA1_20S Fit_4
#q**2_data	ln(I(q))_data	error_data	q**2_fit	ln(I(q))_fit	normalized_residual
0.00012996	1.62147	1.28036	0.00038064	1.00691	0.222167
0.000141848	1.60138	1.16502	0.0004008	0.994101	-0.307695
0.000154256	1.48279	1.03877	0.00042107	0.981225	-0.118725
0.000166926	1.38816	0.621952	0.000442261	0.967764	-0.0421465
0.000180365	1.35629	0.534448	0.000463972	0.953972	0.577442
0.000194324	1.29437	0.435978	0.000485762	0.940131	-0.148188
0.000208514	1.29878	0.29662	0.000508503	0.925685	-0.00263217
0.000223502	1.31211	0.263644	0.000531764	0.910908	-0.616271
0.000239012	1.20086	0.236118	0.000555074	0.896101	0.392332
0.000254722	1.2097	0.174266	0.000579365	0.88067	0.00475227
0.000271261	1.09915	0.151508
0.00028832	1.126	0.128777
0.00030555	1.11186	0.109733
0.00032364	1.07367	0.087897
0.00034225	1.06318	0.0743474
0.000361	1.02376	0.0673204
0.00038064	1.0197	0.0575591
0.0004008	0.978138	0.0518804
0.00042107	0.976101	0.0431566
0.000442261	0.966119	0.0390231
0.000463972	0.971945	0.0311236
0.000485762	0.935873	0.0287324
0.000508503	0.925614	0.0267653
0.000531764	0.895914	0.024331
0.000555074	0.904795	0.0221611
0.000579365	0.880768	0.0206856
0.000604176	0.837782	0.0204072
0.000629508	0.844432	0.0188439
0.000654848	0.833844	0.0174949

[truncated: 64 more sheets: AtLEA3-3_Tris_4, AtLEA3-3_Tris Fit_4, AtLEA3-3_200T_4, AtLEA3-3_200T Fit _4, AtLEA3-3_200S_4, AtLEA3-3_200S Fit_4, AtLEA3-3_20T_4, AtLEA3-3_20T Fit_4, AtLEA3-3_20S_4, AtLEA3-3_20S Fit_4, AtLEA4-2_Tris_4, AtLEA4-2_Tris Fit_4, AtLEA4-2_200T_4, AtLEA4-2_200T Fit_4, AtLEA4-2_200S_4, AtLEA4-2_200S Fit_4, AtLEA4-2_20T_4, AtLEA4-2_20T Fit _4, AtLEA4-2_20S_4, AtLEA4-2_20S Fit_4 …]
