# Supplementary material for: Disordered proteins interact with the chemical environment to tune their protective function during drying
Source: eLife. 2024 Nov 19;13:RP97231. doi: 10.7554/eLife.97231 (PMC11575898; doi:10.7554/eLife.97231)
Supplement: Figure 5—figure supplement 1—source data 1. [file elife-97231-fig5-figsupp1-data1.xlsx]

## Sheet: Trehalose
Temperature	Heat Flow (Normalized)	Sample
20.0191	-0.018259	CT0
20.0185	-0.0182598	CT0
20.0196	-0.0182601	CT0
20.0191	-0.0182604	CT0
20.019	-0.0182605	CT0
20.0189	-0.0182603	CT0
20.0191	-0.01826	CT0
20.0187	-0.01826	CT0
20.0188	-0.0182602	CT0
20.0198	-0.0182605	CT0
20.0196	-0.0182609	CT0
20.0191	-0.0182613	CT0
20.0193	-0.0182621	CT0
20.0203	-0.0182626	CT0
20.0197	-0.0182632	CT0
20.0198	-0.0182636	CT0
20.0204	-0.0182642	CT0
20.0205	-0.0182647	CT0
20.0209	-0.0182653	CT0
20.0209	-0.0182657	CT0
20.0218	-0.0182661	CT0
20.022	-0.0182663	CT0
20.021	-0.0182659	CT0
20.0214	-0.0182656	CT0
20.0222	-0.0182661	CT0
20.022	-0.0182669	CT0
20.0218	-0.0182677	CT0
20.0211	-0.0182681	CT0
20.0221	-0.018268	CT0
20.0235	-0.0182679	CT0
20.0243	-0.0182672	CT0
20.0246	-0.0182665	CT0
20.0249	-0.0182655	CT0
20.0261	-0.0182641	CT0
20.026	-0.0182627	CT0
20.0266	-0.0182615	CT0
20.0272	-0.0182609	CT0
20.0276	-0.0182607	CT0
20.0277	-0.0182604	CT0
20.0287	-0.0182603	CT0
20.0287	-0.0182604	CT0
20.0299	-0.0182603	CT0
20.0306	-0.0182608	CT0
20.0318	-0.0182613	CT0
20.0326	-0.0182623	CT0
20.034	-0.0182637	CT0
20.0347	-0.0182671	CT0
20.0357	-0.0182767	CT0
20.0368	-0.0183054	CT0
20.0385	-0.0183641	CT0
20.0389	-0.018457	CT0
20.0394	-0.0186005	CT0
20.0416	-0.018777	CT0
20.0426	-0.0189795	CT0
20.0433	-0.0192366	CT0
20.0452	-0.019539	CT0
20.0473	-0.0198621	CT0
20.0491	-0.0202979	CT0
20.0504	-0.020753	CT0
20.0518	-0.0213772	CT0
20.0533	-0.0221129	CT0
20.0541	-0.0227445	CT0
20.0561	-0.0233929	CT0
20.0586	-0.0239062	CT0
20.061	-0.0244737	CT0
20.0629	-0.0250411	CT0
20.0651	-0.0256616	CT0
20.0669	-0.0262316	CT0
20.0677	-0.0268727	CT0
20.0711	-0.0275515	CT0
20.072	-0.0282219	CT0
20.0747	-0.0290515	CT0
20.077	-0.0297687	CT0
20.0793	-0.0306373	CT0
20.0815	-0.0313876	CT0
20.0835	-0.0321286	CT0
20.0869	-0.0330107	CT0
20.0892	-0.0339506	CT0
20.0911	-0.0348887	CT0
20.0933	-0.0358953	CT0
20.0963	-0.0368658	CT0
20.0995	-0.0379604	CT0
20.102	-0.0391085	CT0
20.105	-0.0402342	CT0
20.1077	-0.0413388	CT0
20.1104	-0.0424762	CT0
20.1142	-0.0436344	CT0
20.117	-0.044839	CT0
20.12	-0.0461217	CT0
20.1217	-0.0472414	CT0
20.1251	-0.0485548	CT0
20.1281	-0.0498644	CT0
20.1321	-0.0512677	CT0
20.1348	-0.0527221	CT0
20.1372	-0.0540443	CT0
20.1404	-0.055511	CT0
20.1445	-0.0569196	CT0
20.1472	-0.0583157	CT0
20.152	-0.0598055	CT0
20.1549	-0.0612478	CT0
20.1589	-0.062731	CT0
20.1627	-0.0641481	CT0
20.1661	-0.0656134	CT0
20.1706	-0.0671523	CT0
20.1737	-0.0686621	CT0
20.1783	-0.0701232	CT0
20.1819	-0.0718131	CT0
20.1846	-0.0733765	CT0
20.1886	-0.0749127	CT0
20.1917	-0.0765841	CT0
20.1956	-0.0781924	CT0
20.1996	-0.0797438	CT0
20.2033	-0.0813539	CT0
20.2077	-0.0830116	CT0
20.2122	-0.0846984	CT0
20.2159	-0.0863175	CT0
20.2199	-0.0879341	CT0
20.2242	-0.0896059	CT0
20.228	-0.0912809	CT0
20.2326	-0.0928755	CT0
20.2358	-0.0945273	CT0
20.2408	-0.0960416	CT0
20.2446	-0.0976758	CT0
20.2492	-0.0993451	CT0
20.253	-0.10096	CT0
20.2577	-0.102649	CT0
20.2627	-0.104319	CT0
20.2664	-0.105907	CT0
20.271	-0.107367	CT0
20.2765	-0.108884	CT0
20.2799	-0.11051	CT0
20.2847	-0.112104	CT0
20.2887	-0.113693	CT0
20.2935	-0.115326	CT0
20.298	-0.116947	CT0
20.3015	-0.118433	CT0
20.3066	-0.12009	CT0
20.3111	-0.121689	CT0
20.3164	-0.123285	CT0
20.3218	-0.124834	CT0
20.3264	-0.126287	CT0
20.3314	-0.127788	CT0
20.3363	-0.12939	CT0
20.3403	-0.130965	CT0
20.3453	-0.132557	CT0
20.3503	-0.134051	CT0
20.3556	-0.135612	CT0
20.3601	-0.137194	CT0
20.365	-0.138536	CT0
20.3703	-0.139956	CT0
20.3759	-0.141335	CT0
20.3804	-0.142857	CT0
20.3855	-0.14422	CT0
20.3905	-0.145622	CT0
20.3956	-0.147061	CT0
20.4007	-0.148515	CT0
20.4062	-0.149805	CT0
20.4104	-0.151232	CT0
20.4154	-0.152719	CT0
20.4213	-0.154079	CT0
20.4266	-0.155485	CT0
20.4319	-0.156859	CT0
20.4368	-0.158318	CT0
20.4423	-0.159648	CT0
20.4466	-0.161021	CT0
20.4516	-0.162405	CT0
20.458	-0.163666	CT0
20.4636	-0.164861	CT0
20.4689	-0.16605	CT0
20.4741	-0.167296	CT0
20.4797	-0.168626	CT0
20.4853	-0.169981	CT0
20.4903	-0.171273	CT0
20.495	-0.172616	CT0
20.5016	-0.173863	CT0
20.5068	-0.175153	CT0
20.5115	-0.17638	CT0
20.5166	-0.177585	CT0
20.5227	-0.178792	CT0
20.5292	-0.179872	CT0
20.5342	-0.181046	CT0
20.5398	-0.182246	CT0
20.5449	-0.183417	CT0
20.5511	-0.184606	CT0
20.5575	-0.185659	CT0
20.5631	-0.186779	CT0
20.569	-0.187837	CT0
20.5741	-0.189035	CT0
20.5791	-0.190178	CT0
20.585	-0.191347	CT0
20.5909	-0.19236	CT0
20.5976	-0.193502	CT0
20.6028	-0.194586	CT0
20.6093	-0.195724	CT0
20.614	-0.196864	CT0
20.6192	-0.197904	CT0
20.6268	-0.198943	CT0
20.6325	-0.199996	CT0
20.6376	-0.201029	CT0
20.6442	-0.202131	CT0
20.65	-0.203229	CT0
20.6557	-0.204317	CT0
20.6619	-0.2053	CT0
20.6684	-0.206305	CT0
20.6733	-0.207323	CT0
20.6801	-0.208218	CT0
20.6854	-0.209158	CT0
20.6916	-0.210211	CT0
20.6975	-0.21117	CT0
20.7039	-0.212159	CT0
20.7096	-0.213117	CT0
20.7153	-0.214028	CT0
20.7219	-0.215013	CT0
20.7284	-0.215941	CT0
20.7344	-0.216934	CT0
20.7398	-0.217872	CT0
20.7467	-0.218768	CT0
20.7527	-0.219733	CT0
20.7599	-0.220699	CT0
20.7662	-0.221626	CT0
20.772	-0.222471	CT0
20.7774	-0.223432	CT0
20.7839	-0.224219	CT0
20.791	-0.225028	CT0
20.7972	-0.225777	CT0
20.8032	-0.226661	CT0
20.8105	-0.227439	CT0
20.816	-0.22829	CT0
20.821	-0.2291	CT0
20.8276	-0.229979	CT0
20.8343	-0.23082	CT0
20.8402	-0.231745	CT0
20.8465	-0.232716	CT0
20.8527	-0.233652	CT0
20.8589	-0.234539	CT0
20.8656	-0.235435	CT0
20.8725	-0.236184	CT0
20.8798	-0.237041	CT0
20.8864	-0.237729	CT0
20.8925	-0.2385	CT0
20.8984	-0.239169	CT0
20.9049	-0.2398	CT0
20.911	-0.240452	CT0
20.9176	-0.241184	CT0
20.9236	-0.241955	CT0
20.9307	-0.242639	CT0
20.9371	-0.243492	CT0
20.9432	-0.244276	CT0
20.9502	-0.245082	CT0
20.9575	-0.245802	CT0
20.9642	-0.246567	CT0
20.9702	-0.247355	CT0
20.9767	-0.248014	CT0
20.9835	-0.248675	CT0
20.9895	-0.249324	CT0
20.9964	-0.250154	CT0
21.0031	-0.250753	CT0
21.0104	-0.251556	CT0
21.0181	-0.252386	CT0
21.0238	-0.253118	CT0
21.0308	-0.253745	CT0
21.0369	-0.254283	CT0
21.0434	-0.25509	CT0
21.0501	-0.255789	CT0
21.0568	-0.256547	CT0
21.0634	-0.257155	CT0
21.0708	-0.257745	CT0
21.0769	-0.258363	CT0
21.0833	-0.259064	CT0
21.0905	-0.259769	CT0
21.0972	-0.260336	CT0
21.1034	-0.260748	CT0
21.1119	-0.261269	CT0
21.1183	-0.262022	CT0
21.1259	-0.26257	CT0
21.133	-0.263255	CT0
21.1396	-0.263938	CT0
21.1462	-0.264565	CT0
21.1527	-0.265232	CT0
21.1589	-0.265778	CT0
21.1668	-0.266411	CT0
21.1732	-0.266984	CT0
21.1795	-0.267409	CT0
21.1872	-0.267934	CT0
21.1939	-0.268611	CT0
21.2014	-0.269101	CT0
21.2074	-0.269793	CT0
21.2154	-0.270478	CT0
21.2223	-0.271102	CT0
21.2297	-0.271719	CT0
21.2377	-0.272209	CT0
21.2432	-0.27277	CT0
21.2497	-0.273392	CT0
21.2564	-0.273814	CT0
21.2632	-0.274275	CT0
21.2693	-0.274769	CT0
21.2775	-0.27528	CT0
21.2835	-0.275896	CT0
21.2918	-0.276495	CT0
21.2984	-0.277045	CT0
21.3061	-0.277544	CT0
21.3129	-0.278	CT0
21.3199	-0.278445	CT0
21.3285	-0.279096	CT0
21.335	-0.27975	CT0
21.3414	-0.280183	CT0
21.3474	-0.280569	CT0
21.3567	-0.281068	CT0
21.3637	-0.281519	CT0
21.3714	-0.282067	CT0
21.3781	-0.282608	CT0
21.3858	-0.282904	CT0
21.3922	-0.283288	CT0
21.3993	-0.283631	CT0
21.406	-0.284238	CT0
21.4143	-0.284854	CT0
21.4212	-0.285459	CT0
21.4286	-0.285977	CT0
21.4355	-0.286633	CT0
21.4417	-0.287033	CT0
21.4492	-0.287412	CT0
21.4562	-0.287786	CT0
21.4642	-0.288139	CT0
21.471	-0.288615	CT0
21.4786	-0.289032	CT0
21.4855	-0.289461	CT0
21.4935	-0.289806	CT0
21.5005	-0.290258	CT0
21.5083	-0.29068	CT0
21.5153	-0.291337	CT0
21.5219	-0.291696	CT0
21.53	-0.291999	CT0
21.5368	-0.292291	CT0
21.5437	-0.292729	CT0
21.5508	-0.293178	CT0
21.5584	-0.293672	CT0
21.5659	-0.294163	CT0
21.5736	-0.294493	CT0
21.5807	-0.294904	CT0
21.5885	-0.2953	CT0
21.5959	-0.295787	CT0
21.6036	-0.296171	CT0
21.6104	-0.296474	CT0
21.6181	-0.296732	CT0
21.6249	-0.2972	CT0
21.6323	-0.297599	CT0
21.6403	-0.298012	CT0
21.6476	-0.29841	CT0
21.6548	-0.298806	CT0
21.6631	-0.299162	CT0
21.6701	-0.299505	CT0
21.6779	-0.299937	CT0
21.6844	-0.300397	CT0
21.6934	-0.30077	CT0
21.6991	-0.301159	CT0
21.7063	-0.301612	CT0
21.7138	-0.301951	CT0
21.7213	-0.30225	CT0
21.7284	-0.302522	CT0
21.7372	-0.302856	CT0
21.7445	-0.303265	CT0
21.7521	-0.303534	CT0
21.759	-0.303926	CT0
21.7657	-0.304268	CT0
21.7738	-0.304604	CT0
21.7813	-0.304932	CT0
21.7893	-0.305271	CT0
21.7963	-0.30567	CT0
21.8036	-0.305924	CT0
21.8116	-0.306078	CT0
21.8188	-0.306332	CT0
21.8264	-0.306668	CT0
21.8334	-0.306992	CT0
21.8413	-0.307349	CT0
21.8487	-0.307794	CT0
21.857	-0.308208	CT0
21.8652	-0.308632	CT0
21.872	-0.308953	CT0
21.8799	-0.309369	CT0
21.8868	-0.30971	CT0
21.8955	-0.309997	CT0
21.9032	-0.310278	CT0
21.9102	-0.310496	CT0
21.9171	-0.310769	CT0
21.925	-0.310981	CT0
21.9334	-0.311208	CT0
21.9397	-0.31141	CT0
21.948	-0.311702	CT0
21.9549	-0.311933	CT0
21.9629	-0.312249	CT0
21.9697	-0.312541	CT0
21.9784	-0.312939	CT0
21.986	-0.313151	CT0
21.9942	-0.313485	CT0
22.0006	-0.313732	CT0
22.0092	-0.313963	CT0
22.0162	-0.314139	CT0
22.0248	-0.31445	CT0
22.0313	-0.314779	CT0
22.0392	-0.315062	CT0
22.0465	-0.315363	CT0
22.0538	-0.315551	CT0
22.0626	-0.315873	CT0
22.0699	-0.316231	CT0
22.0784	-0.316592	CT0
22.0855	-0.316821	CT0
22.0932	-0.316941	CT0
22.1014	-0.317256	CT0
22.1088	-0.317635	CT0
22.1168	-0.317975	CT0
22.1242	-0.318197	CT0
22.1309	-0.318485	CT0
22.1402	-0.318657	CT0
22.1477	-0.318759	CT0
22.155	-0.31901	CT0
22.163	-0.319239	CT0
22.1708	-0.319468	CT0
22.1793	-0.319572	CT0
22.1865	-0.31986	CT0
22.194	-0.320179	CT0
22.2009	-0.320455	CT0
22.2078	-0.320657	CT0
22.2159	-0.32088	CT0
22.2244	-0.321084	CT0
22.233	-0.32125	CT0
22.2399	-0.321394	CT0
22.2474	-0.321629	CT0
22.2556	-0.321857	CT0
22.2637	-0.322127	CT0
22.2714	-0.322317	CT0
22.2796	-0.3226	CT0
22.2876	-0.322946	CT0
22.2948	-0.323162	CT0
22.3029	-0.323433	CT0
22.3099	-0.323724	CT0
22.3174	-0.324073	CT0
22.3257	-0.324376	CT0
22.3333	-0.32463	CT0
22.3405	-0.324799	CT0
22.3495	-0.325005	CT0
22.3569	-0.325025	CT0
22.365	-0.325077	CT0
22.3731	-0.325359	CT0
22.3814	-0.325524	CT0
22.3886	-0.325515	CT0
22.3968	-0.325666	CT0
22.4048	-0.325773	CT0
22.4134	-0.325872	CT0
22.4208	-0.326095	CT0
22.4277	-0.326312	CT0
22.4358	-0.326581	CT0
22.4432	-0.326851	CT0
22.452	-0.327096	CT0
22.4597	-0.327404	CT0
22.4671	-0.327632	CT0
22.4749	-0.327836	CT0
22.4825	-0.328068	CT0
22.4899	-0.328225	CT0
22.4983	-0.328414	CT0
22.5071	-0.328537	CT0
22.5133	-0.328845	CT0
22.5213	-0.328958	CT0
22.5291	-0.329202	CT0
22.5378	-0.329509	CT0
22.5456	-0.329766	CT0
22.5538	-0.329832	CT0
22.5613	-0.329935	CT0
22.5697	-0.329978	CT0
22.5777	-0.330103	CT0
22.5861	-0.330046	CT0
22.5938	-0.330072	CT0
22.6014	-0.330232	CT0
22.61	-0.33035	CT0
22.6169	-0.330479	CT0
22.6256	-0.330785	CT0
22.6335	-0.33113	CT0
22.64	-0.331382	CT0
22.6488	-0.331631	CT0
22.6564	-0.331769	CT0
22.6644	-0.33206	CT0
22.6724	-0.332238	CT0
22.681	-0.332378	CT0
22.6884	-0.332409	CT0
22.6971	-0.332564	CT0
22.706	-0.332665	CT0
22.7129	-0.332759	CT0
22.7206	-0.332852	CT0
22.7282	-0.332976	CT0
22.7369	-0.333087	CT0
22.7439	-0.333193	CT0
22.7522	-0.33339	CT0
22.7596	-0.333806	CT0
22.7685	-0.334075	CT0
22.7765	-0.334241	CT0
22.784	-0.334312	CT0
22.7917	-0.334409	CT0
22.8001	-0.334471	CT0
22.8075	-0.334464	CT0
22.8157	-0.334462	CT0
22.823	-0.334505	CT0
22.8322	-0.334569	CT0
22.8401	-0.334733	CT0
22.8472	-0.334908	CT0
22.8556	-0.335144	CT0
22.8646	-0.335304	CT0
22.8714	-0.335528	CT0
22.8791	-0.335762	CT0
22.8875	-0.335881	CT0
22.8964	-0.335958	CT0
22.9033	-0.336035	CT0
22.9112	-0.33613	CT0
22.9201	-0.336172	CT0
22.928	-0.336221	CT0
22.9357	-0.336329	CT0
22.944	-0.336406	CT0
22.9522	-0.336531	CT0
22.9595	-0.336854	CT0
22.968	-0.337177	CT0
22.9759	-0.337394	CT0
22.9837	-0.337512	CT0
22.9923	-0.337644	CT0
22.9998	-0.337718	CT0
23.0077	-0.337682	CT0
23.016	-0.337719	CT0
23.0239	-0.337772	CT0
23.0318	-0.337811	CT0
23.0396	-0.337828	CT0
23.0468	-0.337979	CT0
23.0546	-0.338168	CT0
23.0623	-0.338354	CT0
23.0718	-0.338498	CT0
23.0799	-0.338663	CT0
23.088	-0.338769	CT0
23.0973	-0.338833	CT0
23.1048	-0.338901	CT0
23.1117	-0.338993	CT0
23.1212	-0.33904	CT0
23.1285	-0.339124	CT0
23.136	-0.33919	CT0
23.1441	-0.339274	CT0
23.1524	-0.339349	CT0
23.1606	-0.339431	CT0
23.1682	-0.339505	CT0
23.1774	-0.339612	CT0
23.1846	-0.339709	CT0
23.1932	-0.339886	CT0
23.2013	-0.340015	CT0
23.2093	-0.340182	CT0
23.2167	-0.340387	CT0
23.2257	-0.340499	CT0
23.2341	-0.340587	CT0
23.242	-0.340653	CT0
23.2486	-0.340712	CT0
23.2568	-0.340783	CT0
23.2656	-0.340918	CT0
23.2741	-0.340992	CT0
23.2814	-0.341079	CT0
23.2902	-0.341171	CT0
23.2978	-0.341273	CT0
23.3051	-0.341392	CT0
23.3138	-0.341508	CT0
23.321	-0.341543	CT0
23.3298	-0.341543	CT0
23.3374	-0.341541	CT0
23.3456	-0.341584	CT0
23.3543	-0.341662	CT0
23.3634	-0.341749	CT0
23.3707	-0.341863	CT0
23.3785	-0.341943	CT0
23.3868	-0.342024	CT0
23.395	-0.342145	CT0
23.4033	-0.342327	CT0
23.4116	-0.342477	CT0
23.4189	-0.342624	CT0
23.4276	-0.342755	CT0
23.4353	-0.342872	CT0
23.4438	-0.342952	CT0
23.4503	-0.343028	CT0
23.4597	-0.343096	CT0
23.4675	-0.343132	CT0
23.476	-0.343148	CT0
23.4834	-0.343178	CT0
23.4926	-0.343241	CT0
23.5003	-0.343343	CT0
23.5086	-0.343412	CT0
23.5169	-0.343518	CT0
23.5235	-0.343628	CT0
23.5328	-0.343701	CT0
23.5403	-0.343759	CT0
23.5482	-0.343833	CT0
23.5571	-0.34387	CT0
23.5659	-0.343901	CT0
23.5731	-0.343945	CT0
23.5817	-0.34402	CT0
23.5905	-0.344138	CT0
23.597	-0.344239	CT0
23.6064	-0.34432	CT0
23.6144	-0.34438	CT0
23.6232	-0.344432	CT0
23.6309	-0.34445	CT0
23.6389	-0.344461	CT0
23.6468	-0.344473	CT0
23.655	-0.344482	CT0
23.6635	-0.344509	CT0
23.6715	-0.344578	CT0
23.6796	-0.344682	CT0
23.6875	-0.344805	CT0
23.6958	-0.344949	CT0
23.7047	-0.345096	CT0
23.7128	-0.345196	CT0
23.72	-0.345282	CT0
23.7271	-0.345333	CT0
23.737	-0.345396	CT0
23.7448	-0.345457	CT0
23.7528	-0.345516	CT0
23.7611	-0.345576	CT0
23.7694	-0.34565	CT0
23.7771	-0.345719	CT0
23.7866	-0.345818	CT0
23.7938	-0.345906	CT0
23.8018	-0.346016	CT0
23.8096	-0.346096	CT0
23.8185	-0.346174	CT0
23.8268	-0.346233	CT0
23.8346	-0.346295	CT0
23.8431	-0.346344	CT0
23.8511	-0.346397	CT0
23.8601	-0.346493	CT0
23.8678	-0.34659	CT0
23.8763	-0.346697	CT0
23.8836	-0.346773	CT0
23.892	-0.346854	CT0
23.8994	-0.346973	CT0
23.9073	-0.347076	CT0
23.9167	-0.347118	CT0
23.9238	-0.347152	CT0
23.933	-0.347173	CT0
23.9409	-0.347186	CT0
23.9489	-0.347203	CT0
23.9574	-0.347231	CT0
23.9653	-0.347271	CT0
23.9741	-0.347303	CT0
23.9819	-0.347331	CT0
23.9889	-0.347367	CT0
23.9978	-0.347403	CT0
24.006	-0.347443	CT0
24.0144	-0.347481	CT0
24.0232	-0.347505	CT0
24.0314	-0.347539	CT0
24.0391	-0.347578	CT0
24.0475	-0.34762	CT0
24.0552	-0.34765	CT0
24.0639	-0.347674	CT0
24.0727	-0.34771	CT0
24.0806	-0.347745	CT0
24.089	-0.347774	CT0
24.0965	-0.347804	CT0
24.1057	-0.347841	CT0
24.1131	-0.347895	CT0
24.1213	-0.347958	CT0
24.1291	-0.348026	CT0
24.1376	-0.348094	CT0
24.1458	-0.348185	CT0
24.1542	-0.348258	CT0
24.1618	-0.348341	CT0
24.1707	-0.348442	CT0
24.1789	-0.348492	CT0
24.1871	-0.348538	CT0
24.195	-0.348593	CT0
24.2041	-0.348661	CT0
24.2116	-0.348753	CT0
24.2198	-0.348811	CT0
24.2282	-0.348855	CT0
24.236	-0.348901	CT0
24.2448	-0.348951	CT0
24.2534	-0.348982	CT0
24.261	-0.349014	CT0
24.2693	-0.349048	CT0
24.277	-0.349063	CT0
24.285	-0.349073	CT0
24.2933	-0.349089	CT0
24.3019	-0.349122	CT0
24.3099	-0.34916	CT0
24.3185	-0.349221	CT0
24.3261	-0.349318	CT0
24.3347	-0.349398	CT0
24.3424	-0.349465	CT0
24.3517	-0.349534	CT0
24.3607	-0.349609	CT0
24.3682	-0.349666	CT0
24.3766	-0.349691	CT0
24.3849	-0.349701	CT0
24.3926	-0.349716	CT0
24.4013	-0.349736	CT0
24.4092	-0.349757	CT0
24.418	-0.349783	CT0
24.4251	-0.349798	CT0
24.4329	-0.349814	CT0
24.4426	-0.349836	CT0
24.4502	-0.349857	CT0
24.4588	-0.349889	CT0
24.4666	-0.349916	CT0
24.4754	-0.349932	CT0
24.4834	-0.349958	CT0
24.4917	-0.349994	CT0
24.4997	-0.350037	CT0
24.5087	-0.350079	CT0
24.5165	-0.35011	CT0
24.5243	-0.35014	CT0
24.5333	-0.350173	CT0
24.5415	-0.350206	CT0
24.5499	-0.350244	CT0
24.5573	-0.350287	CT0
24.5656	-0.350321	CT0
24.5746	-0.350349	CT0
24.5826	-0.350375	CT0
24.591	-0.35039	CT0
24.5995	-0.350405	CT0
24.6073	-0.350425	CT0
24.615	-0.350445	CT0
24.6245	-0.350458	CT0
24.6331	-0.350463	CT0
24.6405	-0.350468	CT0
24.6488	-0.350475	CT0
24.6566	-0.350482	CT0
24.6658	-0.350488	CT0
24.6734	-0.350499	CT0
24.6812	-0.350517	CT0
24.6905	-0.350553	CT0
24.6982	-0.350627	CT0
24.7066	-0.350707	CT0
24.7148	-0.350808	CT0
24.7234	-0.350856	CT0
24.7313	-0.350891	CT0
24.7391	-0.350916	CT0
24.747	-0.350933	CT0
24.7548	-0.350953	CT0
24.7639	-0.350969	CT0
24.7716	-0.350987	CT0
24.7792	-0.351014	CT0
24.7888	-0.351043	CT0
24.7973	-0.351073	CT0
24.8053	-0.351098	CT0
24.8129	-0.351119	CT0
24.8205	-0.351139	CT0
24.8287	-0.35115	CT0
24.8378	-0.351165	CT0
24.8455	-0.351181	CT0
24.8544	-0.351197	CT0
24.8626	-0.351222	CT0
24.8702	-0.351246	CT0
24.8783	-0.351276	CT0
24.8869	-0.351311	CT0
24.8957	-0.351331	CT0
24.9034	-0.351352	CT0
24.9114	-0.351364	CT0
24.9207	-0.351373	CT0
24.9298	-0.351384	CT0
24.9378	-0.351395	CT0
24.9447	-0.351407	CT0
24.9534	-0.351423	CT0
24.9609	-0.351439	CT0
24.9702	-0.351456	CT0
24.9777	-0.351474	CT0
24.9868	-0.351485	CT0
24.9951	-0.351498	CT0
25.0025	-0.351506	CT0
25.0108	-0.351511	CT0
25.0194	-0.351516	CT0
25.0271	-0.351524	CT0
25.0361	-0.351537	CT0
25.0443	-0.351558	CT0
25.0518	-0.351582	CT0
25.0609	-0.351617	CT0
25.0694	-0.351662	CT0
25.0766	-0.351687	CT0
25.0857	-0.351711	CT0
25.0943	-0.351731	CT0
25.1017	-0.351743	CT0
25.1112	-0.351755	CT0
25.1196	-0.351775	CT0
25.1271	-0.351791	CT0
25.1355	-0.351818	CT0
25.1445	-0.351843	CT0
25.1523	-0.351883	CT0
25.1605	-0.351952	CT0
25.169	-0.352017	CT0
25.1767	-0.35206	CT0
25.1851	-0.352086	CT0
25.194	-0.352103	CT0
25.2019	-0.352116	CT0
25.2094	-0.352145	CT0
25.2175	-0.352155	CT0
25.2264	-0.352158	CT0
25.2341	-0.352162	CT0
25.2427	-0.352177	CT0
25.2512	-0.352187	CT0
25.2591	-0.352196	CT0
25.2676	-0.352209	CT0
25.2754	-0.352233	CT0
25.2839	-0.352264	CT0
25.2918	-0.352296	CT0
25.3013	-0.352314	CT0
25.3085	-0.352329	CT0
25.3167	-0.352335	CT0
25.3257	-0.352341	CT0
25.334	-0.352351	CT0
25.3415	-0.352364	CT0
25.3507	-0.352376	CT0
25.3587	-0.352393	CT0
25.3672	-0.352427	CT0
25.3756	-0.352461	CT0
25.384	-0.352525	CT0
25.3929	-0.352581	CT0
25.4006	-0.352618	CT0
25.4089	-0.352638	CT0
25.4173	-0.352652	CT0
25.4254	-0.35266	CT0
25.4339	-0.352683	CT0
25.4415	-0.3527	CT0
25.4493	-0.352706	CT0
25.4585	-0.35271	CT0
25.466	-0.352716	CT0
25.4742	-0.352721	CT0
25.4831	-0.352728	CT0
25.492	-0.352738	CT0
25.5	-0.352746	CT0
25.5075	-0.352753	CT0
25.5162	-0.352759	CT0
25.524	-0.352765	CT0
25.5325	-0.35277	CT0
25.5415	-0.352778	CT0
25.5499	-0.352787	CT0
25.5571	-0.352794	CT0
25.5665	-0.352799	CT0
25.5743	-0.352807	CT0
25.5832	-0.352828	CT0
25.5899	-0.352857	CT0
25.5986	-0.352898	CT0
25.6073	-0.352936	CT0
25.6156	-0.352969	CT0
25.6236	-0.352983	CT0
25.6326	-0.352998	CT0
25.6402	-0.353011	CT0
25.6487	-0.353018	CT0
25.6577	-0.353024	CT0
25.6658	-0.353031	CT0
25.6737	-0.35304	CT0
25.6819	-0.353049	CT0
25.6899	-0.353055	CT0
25.6991	-0.353062	CT0
25.7071	-0.353069	CT0
25.7156	-0.353076	CT0
25.7243	-0.353091	CT0
25.7325	-0.353119	CT0
25.74	-0.353142	CT0
25.7483	-0.353176	CT0
25.7564	-0.353198	CT0
25.7651	-0.353214	CT0
25.7731	-0.353242	CT0
25.7811	-0.353261	CT0
25.7902	-0.353271	CT0
25.7966	-0.353283	CT0
25.8059	-0.353287	CT0
25.8141	-0.353291	CT0
25.8239	-0.353294	CT0
25.8312	-0.353297	CT0
25.84	-0.353301	CT0
25.8475	-0.353305	CT0
25.8554	-0.353311	CT0
25.8642	-0.353333	CT0
25.8719	-0.353369	CT0
25.8815	-0.353417	CT0
25.8896	-0.353452	CT0
25.8982	-0.35347	CT0
25.9055	-0.353488	CT0
25.9153	-0.353499	CT0
25.923	-0.353505	CT0
25.9311	-0.35351	CT0
25.9386	-0.353516	CT0
25.9471	-0.353521	CT0
25.9548	-0.353527	CT0
25.9634	-0.353534	CT0
25.9719	-0.353543	CT0
25.9803	-0.353551	CT0
25.989	-0.353558	CT0
25.9969	-0.35357	CT0
26.0052	-0.353587	CT0
26.0151	-0.353595	CT0
26.023	-0.353602	CT0
26.0314	-0.353609	CT0
26.0394	-0.353615	CT0
26.0475	-0.353621	CT0
26.0557	-0.353627	CT0
26.0642	-0.353633	CT0
26.0724	-0.353638	CT0
26.0805	-0.353642	CT0
26.0887	-0.353647	CT0
26.0962	-0.353652	CT0
26.1061	-0.353658	CT0
26.1131	-0.353663	CT0
26.1223	-0.353671	CT0
26.1299	-0.353697	CT0
26.1386	-0.353714	CT0
26.1467	-0.353741	CT0
26.1558	-0.353787	CT0
26.1646	-0.353834	CT0
26.1728	-0.353855	CT0
26.1801	-0.353877	CT0
26.1891	-0.35389	CT0
26.1963	-0.353898	CT0
26.2057	-0.353908	CT0
26.213	-0.353914	CT0
26.2211	-0.353921	CT0
26.2289	-0.353927	CT0
26.2388	-0.353932	CT0
26.2475	-0.353939	CT0
26.2553	-0.353946	CT0
26.2626	-0.353953	CT0
26.2718	-0.35396	CT0
26.2801	-0.353967	CT0
26.2882	-0.353974	CT0
26.2963	-0.35398	CT0
26.3044	-0.353984	CT0
26.3138	-0.35399	CT0
26.3208	-0.353997	CT0
26.3298	-0.354003	CT0
26.3377	-0.35401	CT0
26.3456	-0.354016	CT0
26.3546	-0.354024	CT0
26.3628	-0.35404	CT0
26.3706	-0.354055	CT0
26.3788	-0.354063	CT0
26.3877	-0.354069	CT0
26.3952	-0.354075	CT0
26.404	-0.354082	CT0
26.4122	-0.354088	CT0
26.42	-0.354094	CT0
26.4294	-0.3541	CT0
26.4374	-0.354107	CT0
26.4463	-0.354114	CT0
26.4548	-0.354127	CT0
26.4617	-0.354145	CT0
26.47	-0.354153	CT0
26.479	-0.354161	CT0
26.4874	-0.354169	CT0
26.4966	-0.354176	CT0
26.5045	-0.354184	CT0
26.5123	-0.35419	CT0
26.5215	-0.354196	CT0
26.5295	-0.354203	CT0
26.5379	-0.35421	CT0
26.545	-0.354217	CT0
26.5544	-0.354225	CT0
26.5626	-0.354233	CT0
26.5705	-0.354242	CT0
26.5797	-0.35425	CT0
26.5874	-0.354257	CT0
26.595	-0.354265	CT0
26.6039	-0.354271	CT0
26.6118	-0.354278	CT0
26.6208	-0.354286	CT0
26.6292	-0.354294	CT0
26.637	-0.354303	CT0
26.6452	-0.354311	CT0
26.6546	-0.354318	CT0
26.663	-0.354327	CT0
26.6705	-0.354334	CT0
26.6792	-0.354341	CT0
26.6871	-0.354349	CT0
26.6954	-0.354357	CT0
26.703	-0.354365	CT0
26.711	-0.35438	CT0
26.7212	-0.354404	CT0
26.7288	-0.354433	CT0
26.737	-0.35446	CT0
26.7455	-0.354475	CT0
26.7544	-0.354485	CT0
26.7622	-0.354493	CT0
26.7699	-0.3545	CT0
26.7793	-0.354507	CT0
26.7883	-0.354514	CT0
26.7951	-0.35452	CT0
26.8039	-0.354526	CT0
26.813	-0.354533	CT0
26.8206	-0.35454	CT0
26.8282	-0.354548	CT0
26.838	-0.354556	CT0
26.8446	-0.354568	CT0
26.8542	-0.354576	CT0
26.8628	-0.354584	CT0
26.8707	-0.354592	CT0
26.8787	-0.3546	CT0
26.8866	-0.354608	CT0
26.8948	-0.354615	CT0
26.9026	-0.354621	CT0
26.9113	-0.354628	CT0
26.92	-0.354635	CT0
26.929	-0.354642	CT0
26.9365	-0.35465	CT0
26.945	-0.354659	CT0
26.9534	-0.35467	CT0
26.9625	-0.354681	CT0
26.9704	-0.354705	CT0
26.9785	-0.354739	CT0
26.9865	-0.354769	CT0
26.9951	-0.354785	CT0
27.0034	-0.354794	CT0
27.012	-0.354802	CT0
27.0206	-0.35481	CT0
27.0283	-0.354818	CT0
27.0375	-0.354826	CT0
27.0451	-0.354833	CT0
27.0548	-0.354841	CT0
27.0626	-0.354848	CT0
27.0708	-0.354856	CT0
27.0785	-0.354864	CT0
27.0869	-0.354871	CT0
27.0956	-0.354877	CT0
27.1041	-0.354883	CT0
27.1121	-0.35489	CT0
27.1204	-0.354897	CT0
27.1283	-0.354905	CT0
27.1372	-0.354912	CT0
27.1452	-0.35492	CT0
27.1533	-0.354928	CT0
27.161	-0.354935	CT0
27.1691	-0.354942	CT0
27.1776	-0.354949	CT0
27.1862	-0.354955	CT0
27.1942	-0.354961	CT0
27.2032	-0.354966	CT0
27.2114	-0.354972	CT0
27.2203	-0.35498	CT0
27.2295	-0.354989	CT0
27.2378	-0.354997	CT0
27.246	-0.355005	CT0
27.2539	-0.355013	CT0
27.2623	-0.355021	CT0
27.2695	-0.355029	CT0
27.2791	-0.355037	CT0
27.2871	-0.355043	CT0
27.2945	-0.355048	CT0
27.3028	-0.355053	CT0
27.3111	-0.355059	CT0
27.3205	-0.355065	CT0
27.3282	-0.355072	CT0
27.3364	-0.355079	CT0
27.3451	-0.355086	CT0
27.3533	-0.355093	CT0
27.3615	-0.355101	CT0
27.3693	-0.355112	CT0
27.3778	-0.355125	CT0
27.3861	-0.355133	CT0
27.3955	-0.355141	CT0
27.4028	-0.35515	CT0
27.4122	-0.355157	CT0
27.4196	-0.355162	CT0
27.4291	-0.355166	CT0
27.4371	-0.35517	CT0
27.4444	-0.355174	CT0
27.4524	-0.355178	CT0
27.4614	-0.355183	CT0
27.4699	-0.355189	CT0
27.4783	-0.355195	CT0
27.4859	-0.355203	CT0
27.4947	-0.355216	CT0
27.5028	-0.355224	CT0
27.512	-0.355231	CT0
27.5198	-0.355237	CT0
27.5283	-0.355241	CT0
27.5371	-0.355246	CT0
27.5456	-0.355252	CT0
27.5536	-0.355257	CT0
27.5618	-0.355264	CT0
27.5703	-0.35527	CT0
27.5789	-0.355276	CT0
27.5872	-0.355283	CT0
27.5944	-0.355289	CT0
27.6032	-0.355295	CT0
27.6111	-0.355299	CT0
27.6207	-0.355303	CT0
27.6283	-0.355308	CT0
27.6363	-0.355312	CT0
27.6443	-0.355317	CT0
27.6526	-0.355323	CT0
27.6619	-0.355329	CT0
27.6697	-0.355334	CT0
27.6775	-0.35534	CT0
27.6859	-0.355345	CT0
27.6947	-0.35535	CT0
27.7033	-0.355355	CT0
27.7112	-0.35536	CT0
27.7193	-0.355365	CT0
27.7275	-0.35537	CT0
27.7358	-0.355375	CT0
27.7458	-0.355381	CT0
27.7533	-0.355387	CT0
27.7613	-0.355394	CT0
27.7686	-0.3554	CT0
27.7775	-0.355405	CT0
27.7859	-0.35541	CT0
27.7952	-0.355414	CT0
27.8039	-0.355418	CT0
27.811	-0.355421	CT0
27.82	-0.355423	CT0
27.8288	-0.355427	CT0
27.8371	-0.35543	CT0
27.8448	-0.355435	CT0
27.853	-0.35544	CT0
27.8616	-0.355446	CT0
27.8703	-0.355453	CT0
27.8785	-0.35546	CT0
27.8862	-0.355467	CT0
27.8951	-0.355475	CT0
27.904	-0.355481	CT0
27.9117	-0.355487	CT0
27.9199	-0.355493	CT0
27.9281	-0.355498	CT0
27.9363	-0.355504	CT0
27.944	-0.35551	CT0
27.952	-0.355516	CT0
27.961	-0.355523	CT0
27.9694	-0.355531	CT0
27.9778	-0.35554	CT0
27.9861	-0.355552	CT0
27.9949	-0.355561	CT0
28.0029	-0.355568	CT0
28.0105	-0.355574	CT0
28.0194	-0.355581	CT0
28.0283	-0.355586	CT0
28.0361	-0.35559	CT0
28.0446	-0.355594	CT0
28.0532	-0.355597	CT0
28.0606	-0.355601	CT0
28.07	-0.355605	CT0
28.0778	-0.35561	CT0
28.0859	-0.355615	CT0
28.0935	-0.355619	CT0
28.1029	-0.355622	CT0
28.1109	-0.355626	CT0
28.12	-0.35563	CT0
28.1282	-0.355633	CT0
28.1366	-0.355637	CT0
28.1451	-0.355642	CT0
28.1532	-0.355647	CT0
28.1624	-0.355653	CT0
28.1702	-0.355659	CT0
28.1787	-0.355666	CT0
28.1863	-0.355675	CT0
28.1949	-0.355682	CT0
28.2031	-0.355689	CT0
28.2116	-0.355694	CT0
28.2201	-0.3557	CT0
28.2287	-0.355705	CT0
28.2363	-0.35571	CT0
28.2436	-0.355714	CT0
28.2528	-0.355719	CT0
28.2618	-0.355723	CT0
28.2699	-0.355727	CT0
28.2787	-0.355733	CT0
28.2866	-0.355739	CT0
28.2951	-0.355744	CT0
28.3041	-0.355749	CT0
28.3121	-0.355754	CT0
28.3198	-0.355758	CT0
28.3277	-0.355762	CT0
28.336	-0.355767	CT0
28.345	-0.355772	CT0
28.3537	-0.355778	CT0
28.3615	-0.355784	CT0
28.3696	-0.355801	CT0
28.3781	-0.355814	CT0
28.3869	-0.355823	CT0
28.3957	-0.35583	CT0
28.4042	-0.355835	CT0
28.4132	-0.355839	CT0
28.4204	-0.355842	CT0
28.4285	-0.355845	CT0
28.4368	-0.355849	CT0
28.4451	-0.355852	CT0
28.4536	-0.355856	CT0
28.4609	-0.355861	CT0
28.4698	-0.355866	CT0
28.477	-0.355873	CT0
28.4867	-0.355878	CT0
28.4949	-0.355884	CT0
28.5026	-0.355889	CT0
28.511	-0.355894	CT0
28.5193	-0.355899	CT0
28.5284	-0.355904	CT0
28.5374	-0.35591	CT0
28.5451	-0.355916	CT0
28.5537	-0.355922	CT0
28.5613	-0.355928	CT0
28.5706	-0.355937	CT0
28.5793	-0.355944	CT0
28.5872	-0.35595	CT0
28.5942	-0.355956	CT0
28.6034	-0.355959	CT0
28.6112	-0.355962	CT0
28.6202	-0.355964	CT0
28.6298	-0.355967	CT0
28.6373	-0.35597	CT0
28.6454	-0.355974	CT0
28.6537	-0.355979	CT0
28.6625	-0.355984	CT0
28.6706	-0.355988	CT0
28.6793	-0.355993	CT0
28.6873	-0.355998	CT0
28.6967	-0.356002	CT0
28.7037	-0.356005	CT0
28.7121	-0.356008	CT0
28.7206	-0.356012	CT0
28.7292	-0.356016	CT0
28.7374	-0.356021	CT0
28.7457	-0.356028	CT0
28.7531	-0.356035	CT0
28.7618	-0.356041	CT0
28.7697	-0.356049	CT0
28.7787	-0.356055	CT0
28.7856	-0.35606	CT0
28.7948	-0.356064	CT0
28.8037	-0.356067	CT0
28.8118	-0.35607	CT0
28.8202	-0.356073	CT0
28.829	-0.356076	CT0
28.8372	-0.356079	CT0
28.8457	-0.356082	CT0
28.8539	-0.356085	CT0
28.8624	-0.356089	CT0
28.8702	-0.356093	CT0
28.8786	-0.356096	CT0
28.8871	-0.356099	CT0
28.896	-0.356102	CT0
28.9045	-0.356105	CT0
28.9124	-0.356109	CT0
28.9203	-0.356114	CT0
28.9296	-0.356119	CT0
28.9365	-0.356127	CT0
28.9455	-0.356132	CT0
28.9539	-0.356137	CT0
28.9627	-0.356141	CT0
28.9705	-0.356144	CT0
28.9796	-0.356146	CT0
28.987	-0.356148	CT0
28.9959	-0.35615	CT0
29.0043	-0.356151	CT0
29.0132	-0.356152	CT0
29.0204	-0.356154	CT0
29.0296	-0.356156	CT0
29.0368	-0.356159	CT0
29.0452	-0.356161	CT0
29.0539	-0.356163	CT0
29.0628	-0.356165	CT0
29.0704	-0.356168	CT0
29.0785	-0.356171	CT0
29.0864	-0.356175	CT0
29.0955	-0.356179	CT0
29.1036	-0.356183	CT0
29.1127	-0.356188	CT0
29.1202	-0.356191	CT0
29.1284	-0.356194	CT0
29.1375	-0.356196	CT0
29.1457	-0.356198	CT0
29.1538	-0.356199	CT0
29.163	-0.3562	CT0
29.1702	-0.3562	CT0
29.1786	-0.356201	CT0
29.1879	-0.356203	CT0
29.1948	-0.356206	CT0
29.2042	-0.35621	CT0
29.2122	-0.356213	CT0
29.2205	-0.356217	CT0
29.2291	-0.356221	CT0
29.2374	-0.356225	CT0
29.2456	-0.35623	CT0
29.2541	-0.356234	CT0
29.2628	-0.356238	CT0
29.2712	-0.35624	CT0
29.2796	-0.356243	CT0
29.2884	-0.356245	CT0
29.2962	-0.356248	CT0
29.3042	-0.35625	CT0
29.3126	-0.35625	CT0
29.3207	-0.356251	CT0
29.3289	-0.356251	CT0
29.3374	-0.356252	CT0
29.3463	-0.356253	CT0
29.3536	-0.356254	CT0
29.3624	-0.356255	CT0
29.3709	-0.356257	CT0
29.3797	-0.356259	CT0
29.3883	-0.356261	CT0
29.3951	-0.356264	CT0
29.4043	-0.356267	CT0
29.4128	-0.356271	CT0
29.42	-0.356273	CT0
29.4284	-0.356276	CT0
29.437	-0.356278	CT0
29.4451	-0.35628	CT0
29.453	-0.356282	CT0
29.4623	-0.356283	CT0
29.4715	-0.356285	CT0
29.4789	-0.356287	CT0
29.4891	-0.356289	CT0
29.4971	-0.356291	CT0
29.505	-0.356294	CT0
29.5134	-0.356296	CT0
29.5207	-0.356299	CT0
29.5292	-0.356301	CT0
29.5374	-0.356303	CT0
29.546	-0.356306	CT0
29.554	-0.356309	CT0
29.5617	-0.356312	CT0
29.5707	-0.356315	CT0
29.5791	-0.356317	CT0
29.5878	-0.356319	CT0
29.596	-0.356322	CT0
29.6046	-0.356324	CT0
29.614	-0.356326	CT0
29.6212	-0.356327	CT0
29.6291	-0.356326	CT0
29.6369	-0.356326	CT0
29.646	-0.356328	CT0
29.655	-0.356331	CT0
29.6627	-0.356333	CT0
29.6723	-0.356336	CT0
29.6793	-0.35634	CT0
29.6873	-0.35635	CT0
29.6957	-0.356366	CT0
29.7045	-0.356371	CT0
29.7131	-0.356376	CT0
29.7219	-0.356378	CT0
29.7291	-0.35638	CT0
29.7385	-0.356383	CT0
29.7459	-0.356387	CT0
29.7545	-0.35639	CT0
29.7636	-0.356393	CT0
29.7714	-0.356396	CT0
29.7795	-0.356398	CT0
29.7878	-0.356401	CT0
29.797	-0.356404	CT0
29.8059	-0.356407	CT0
29.8126	-0.356409	CT0
29.8218	-0.356411	CT0
29.83	-0.356414	CT0
29.8386	-0.356417	CT0
29.847	-0.356421	CT0
29.8547	-0.356425	CT0
29.8631	-0.356429	CT0
29.8715	-0.356433	CT0
29.8797	-0.356438	CT0
29.8885	-0.356443	CT0
29.8975	-0.356448	CT0
29.9051	-0.356452	CT0
29.9134	-0.356455	CT0
29.9213	-0.356457	CT0
29.93	-0.356458	CT0
29.9383	-0.35646	CT0
29.947	-0.356462	CT0
29.9544	-0.356463	CT0
29.963	-0.356464	CT0
29.9722	-0.356466	CT0
29.9806	-0.356468	CT0
29.9883	-0.35647	CT0
29.9964	-0.356473	CT0
30.0053	-0.356476	CT0
30.0132	-0.356479	CT0
30.0213	-0.356484	CT0
30.0306	-0.356488	CT0
30.0377	-0.356493	CT0
30.0469	-0.356497	CT0
30.0544	-0.3565	CT0
30.0639	-0.356502	CT0
30.0715	-0.356504	CT0
30.0802	-0.356504	CT0
30.0889	-0.356504	CT0
30.0971	-0.356504	CT0
30.1052	-0.356504	CT0
30.1131	-0.356505	CT0
30.1213	-0.356507	CT0
30.1301	-0.356509	CT0
30.1381	-0.356512	CT0
30.1464	-0.356515	CT0
30.1557	-0.356518	CT0
30.1631	-0.35652	CT0
30.171	-0.356522	CT0
30.1798	-0.356525	CT0
30.1883	-0.356527	CT0
30.1969	-0.356531	CT0
30.2055	-0.356533	CT0
30.2134	-0.356537	CT0
30.2213	-0.35654	CT0
30.231	-0.356544	CT0
30.2387	-0.356547	CT0
30.2466	-0.356549	CT0
30.2555	-0.356551	CT0
30.2632	-0.356553	CT0
30.2714	-0.356553	CT0
30.2801	-0.356555	CT0
30.2873	-0.356556	CT0
30.2962	-0.356559	CT0
30.3057	-0.356561	CT0
30.313	-0.356564	CT0
30.3216	-0.356566	CT0
30.3304	-0.356568	CT0
30.3384	-0.35657	CT0
30.3465	-0.356572	CT0
30.3552	-0.356574	CT0
30.3646	-0.356575	CT0
30.3718	-0.356576	CT0
30.3809	-0.356577	CT0
30.389	-0.356579	CT0
30.3965	-0.356581	CT0
30.4053	-0.356583	CT0
30.4145	-0.356585	CT0
30.4207	-0.356586	CT0
30.4291	-0.356587	CT0
30.4384	-0.356588	CT0
30.4474	-0.356588	CT0
30.455	-0.356588	CT0
30.4632	-0.356588	CT0
30.4722	-0.356587	CT0
30.4803	-0.356586	CT0
30.4881	-0.356586	CT0
30.4961	-0.356586	CT0
30.5048	-0.356587	CT0
30.5129	-0.356587	CT0
30.522	-0.356587	CT0
30.5308	-0.356587	CT0
30.5385	-0.356587	CT0
30.5466	-0.356588	CT0
30.5552	-0.356589	CT0
30.5636	-0.356591	CT0
30.5708	-0.356592	CT0
30.5794	-0.356593	CT0
30.5872	-0.356595	CT0
30.5966	-0.356596	CT0
30.6057	-0.356597	CT0
30.6125	-0.356596	CT0
30.6215	-0.356596	CT0
30.6307	-0.356596	CT0
30.6386	-0.356594	CT0
30.6466	-0.356594	CT0
30.6545	-0.356596	CT0
30.6639	-0.356599	CT0
30.6723	-0.356601	CT0
30.6804	-0.356602	CT0
30.6883	-0.356603	CT0
30.6977	-0.356604	CT0
30.7053	-0.356603	CT0
30.7133	-0.356602	CT0
30.7224	-0.356601	CT0
30.7303	-0.356597	CT0
30.7389	-0.356593	CT0
30.7469	-0.356593	CT0
30.7548	-0.356594	CT0
30.7636	-0.356596	CT0
30.772	-0.356598	CT0
30.7809	-0.356601	CT0
30.7886	-0.356605	CT0
30.7981	-0.356608	CT0
30.8056	-0.35661	CT0
30.8137	-0.356611	CT0
30.8221	-0.356611	CT0
30.8307	-0.356609	CT0
30.8387	-0.356608	CT0
30.8477	-0.356607	CT0
30.8557	-0.356605	CT0
30.8646	-0.356604	CT0
30.8736	-0.356604	CT0
30.8812	-0.356604	CT0
30.8886	-0.356605	CT0
30.8979	-0.356607	CT0
30.906	-0.356608	CT0
30.9135	-0.356609	CT0
30.9223	-0.356609	CT0
30.9304	-0.356609	CT0
30.9395	-0.356609	CT0
30.9477	-0.356609	CT0
30.9552	-0.356608	CT0
30.9639	-0.356606	CT0
30.9727	-0.356605	CT0
30.9815	-0.356605	CT0
30.9895	-0.356605	CT0
30.9974	-0.356607	CT0
31.0056	-0.35661	CT0
31.0134	-0.356612	CT0
31.0217	-0.356615	CT0
31.0305	-0.356618	CT0
31.0392	-0.356621	CT0
31.0471	-0.356623	CT0
31.0555	-0.356623	CT0
31.0636	-0.356623	CT0
31.0721	-0.356622	CT0
31.0806	-0.356622	CT0
31.0893	-0.356622	CT0
31.097	-0.356623	CT0
31.1055	-0.356623	CT0
31.1134	-0.356623	CT0
31.1225	-0.356623	CT0
31.1302	-0.356625	CT0
31.1383	-0.356626	CT0
31.1473	-0.356627	CT0
31.1561	-0.356627	CT0
31.1632	-0.356627	CT0
31.1714	-0.356629	CT0
31.1807	-0.35663	CT0
31.1891	-0.356633	CT0
31.1972	-0.356635	CT0
31.2057	-0.356638	CT0
31.2145	-0.356639	CT0
31.2227	-0.356641	CT0
31.231	-0.356641	CT0
31.2392	-0.356641	CT0
31.2474	-0.35664	CT0
31.2563	-0.356638	CT0
31.265	-0.356637	CT0
31.2727	-0.356636	CT0
31.281	-0.356636	CT0
31.2894	-0.356638	CT0
31.298	-0.35664	CT0
31.3061	-0.356642	CT0
31.3136	-0.356644	CT0
31.3226	-0.356645	CT0
31.3307	-0.356647	CT0
31.3395	-0.356648	CT0
31.3484	-0.356648	CT0
31.3566	-0.356647	CT0
31.3639	-0.356647	CT0
31.373	-0.356648	CT0
31.3825	-0.356651	CT0
31.3905	-0.356654	CT0
31.3988	-0.356656	CT0
31.4068	-0.356658	CT0
31.4156	-0.356659	CT0
31.4232	-0.35666	CT0
31.4312	-0.356662	CT0
31.4393	-0.356664	CT0
31.4481	-0.356665	CT0
31.4574	-0.356667	CT0
31.4657	-0.356668	CT0
31.4732	-0.356671	CT0
31.4818	-0.356673	CT0
31.4901	-0.356676	CT0
31.4985	-0.356678	CT0
31.5065	-0.356681	CT0
31.5159	-0.356684	CT0
31.5233	-0.356686	CT0
31.5321	-0.356689	CT0
31.5402	-0.356691	CT0
31.5494	-0.356693	CT0
31.5568	-0.356693	CT0
31.5642	-0.356694	CT0
31.573	-0.356694	CT0
31.5813	-0.356694	CT0
31.5907	-0.356693	CT0
31.5985	-0.356693	CT0
31.6063	-0.356693	CT0
31.6147	-0.356693	CT0
31.6235	-0.356694	CT0
31.6314	-0.356696	CT0
31.6404	-0.356698	CT0
31.6488	-0.3567	CT0
31.6559	-0.356702	CT0
31.6646	-0.356705	CT0
31.6726	-0.356707	CT0
31.682	-0.35671	CT0
31.6894	-0.356713	CT0
31.6986	-0.356716	CT0
31.7073	-0.356716	CT0
31.7156	-0.356716	CT0
31.7226	-0.356717	CT0
31.7319	-0.356718	CT0
31.7393	-0.356719	CT0
31.7478	-0.35672	CT0
31.7564	-0.356722	CT0
31.765	-0.356723	CT0
31.7728	-0.356724	CT0
31.7811	-0.356725	CT0
31.7907	-0.356726	CT0
31.7985	-0.356725	CT0
31.8062	-0.356724	CT0
31.815	-0.356723	CT0
31.8224	-0.356722	CT0
31.8313	-0.356723	CT0
31.8402	-0.356723	CT0
31.8491	-0.356724	CT0
31.8573	-0.356726	CT0
31.8657	-0.356727	CT0
31.8738	-0.356729	CT0
31.8824	-0.356728	CT0
31.8899	-0.356728	CT0
31.8983	-0.356729	CT0
31.9075	-0.35673	CT0
31.915	-0.356731	CT0
31.923	-0.356732	CT0
31.9318	-0.356734	CT0
31.9402	-0.356738	CT0
31.9475	-0.356743	CT0
31.9568	-0.356748	CT0
31.965	-0.35675	CT0
31.9731	-0.356752	CT0
31.9808	-0.356753	CT0
31.9889	-0.356754	CT0
31.9984	-0.356755	CT0
32.0065	-0.356755	CT0
32.0149	-0.356754	CT0
32.024	-0.356751	CT0
32.0322	-0.356748	CT0
32.0408	-0.356745	CT0
32.0478	-0.356742	CT0
32.0565	-0.356739	CT0
32.0661	-0.356738	CT0
32.0735	-0.356738	CT0
32.0812	-0.356739	CT0
32.0901	-0.35674	CT0
32.0982	-0.356743	CT0
32.1064	-0.356745	CT0
32.1153	-0.356748	CT0
32.1241	-0.35675	CT0
32.1327	-0.356752	CT0
32.141	-0.356753	CT0
32.148	-0.356754	CT0
32.1579	-0.356755	CT0
32.1657	-0.356758	CT0
32.1729	-0.35676	CT0
32.1819	-0.356762	CT0
32.1904	-0.356765	CT0
32.1986	-0.356768	CT0
32.2072	-0.356771	CT0
32.2147	-0.356774	CT0
32.2235	-0.356775	CT0
32.2312	-0.356775	CT0
32.2407	-0.356775	CT0
32.2488	-0.356774	CT0
32.2556	-0.356773	CT0
32.2648	-0.356773	CT0
32.2736	-0.356772	CT0
32.2817	-0.356772	CT0
32.2909	-0.356773	CT0
32.2977	-0.356773	CT0
32.3066	-0.356775	CT0
32.3158	-0.356777	CT0
32.324	-0.356778	CT0
32.3332	-0.356779	CT0
32.3401	-0.35678	CT0
32.3492	-0.356782	CT0
32.3578	-0.356783	CT0
32.3652	-0.356784	CT0
32.3742	-0.356786	CT0
32.3813	-0.356788	CT0
32.3896	-0.356789	CT0
32.3983	-0.356789	CT0
32.4065	-0.356788	CT0
32.4153	-0.356788	CT0
32.4225	-0.356788	CT0
32.4307	-0.356788	CT0
32.4394	-0.356788	CT0
32.4479	-0.356789	CT0
32.4563	-0.35679	CT0
32.465	-0.356792	CT0
32.4731	-0.356795	CT0
32.4814	-0.356798	CT0
32.4898	-0.356801	CT0
32.4988	-0.356803	CT0
32.5077	-0.356805	CT0
32.5159	-0.356806	CT0
32.5239	-0.356806	CT0
32.5329	-0.356806	CT0
32.5404	-0.356806	CT0
32.5486	-0.356806	CT0
32.5573	-0.356806	CT0
32.5645	-0.356805	CT0
32.5746	-0.356806	CT0
32.5815	-0.356807	CT0
32.5894	-0.356809	CT0
32.5994	-0.356813	CT0
32.6076	-0.35682	CT0
32.6165	-0.356824	CT0
32.6236	-0.356826	CT0
32.6325	-0.35683	CT0
32.6408	-0.356833	CT0
32.6488	-0.356836	CT0
32.6575	-0.356838	CT0
32.6658	-0.356839	CT0
32.6739	-0.356842	CT0
32.6815	-0.356845	CT0
32.69	-0.356848	CT0
32.6986	-0.356851	CT0
32.7068	-0.356853	CT0
32.7152	-0.356854	CT0
32.7239	-0.356855	CT0
32.7318	-0.356857	CT0
32.7417	-0.35686	CT0
32.7496	-0.356862	CT0
32.7576	-0.356865	CT0
32.7657	-0.356868	CT0
32.7737	-0.356871	CT0
32.7829	-0.356873	CT0
32.7903	-0.356875	CT0
32.7994	-0.356875	CT0
32.8074	-0.356876	CT0
32.8161	-0.356878	CT0
32.8242	-0.356879	CT0
32.8323	-0.356882	CT0
32.8417	-0.356885	CT0
32.8496	-0.356888	CT0
32.858	-0.356892	CT0
32.8664	-0.356899	CT0
32.8745	-0.356906	CT0
32.8831	-0.356909	CT0
32.8913	-0.356911	CT0
32.9005	-0.356913	CT0
32.9078	-0.356915	CT0
32.9166	-0.356916	CT0
32.9241	-0.356916	CT0
32.9324	-0.356917	CT0
32.9418	-0.356918	CT0
32.9495	-0.35692	CT0
32.9584	-0.356922	CT0
32.9664	-0.356925	CT0
32.9746	-0.356929	CT0
32.9836	-0.356932	CT0
32.9916	-0.356935	CT0
32.9995	-0.356938	CT0
33.0074	-0.35694	CT0
33.0165	-0.356942	CT0
33.0243	-0.356944	CT0
33.0321	-0.356947	CT0
33.041	-0.35695	CT0
33.0493	-0.356953	CT0
33.0581	-0.356956	CT0
33.066	-0.35696	CT0
33.0744	-0.356963	CT0
33.0835	-0.356966	CT0
33.0917	-0.356969	CT0
33.0993	-0.35697	CT0
33.1087	-0.356971	CT0
33.1164	-0.356972	CT0
33.1247	-0.356973	CT0
33.1325	-0.356974	CT0
33.1414	-0.356977	CT0
33.1496	-0.356979	CT0
33.1579	-0.356982	CT0
33.1665	-0.356983	CT0
33.1748	-0.356985	CT0
33.1834	-0.356987	CT0
33.1911	-0.356989	CT0
33.1992	-0.356991	CT0
33.2073	-0.356994	CT0
33.2166	-0.356998	CT0
33.2244	-0.357002	CT0
33.233	-0.357006	CT0
33.2415	-0.35701	CT0
33.2498	-0.357013	CT0
33.2579	-0.357014	CT0
33.2673	-0.357014	CT0
33.2751	-0.357014	CT0
33.2835	-0.357013	CT0
33.2926	-0.357013	CT0
33.3002	-0.357013	CT0
33.308	-0.357013	CT0
33.3174	-0.357014	CT0
33.3251	-0.357015	CT0
33.3333	-0.357016	CT0
33.3411	-0.357018	CT0
33.3497	-0.35702	CT0
33.3573	-0.357023	CT0
33.3665	-0.357026	CT0
33.3748	-0.357029	CT0
33.3824	-0.357032	CT0
33.3913	-0.357035	CT0
33.4007	-0.357036	CT0
33.4092	-0.357037	CT0
33.416	-0.357039	CT0
33.4258	-0.357039	CT0
33.4339	-0.357039	CT0
33.4428	-0.357039	CT0
33.4503	-0.357041	CT0
33.459	-0.357044	CT0
33.4667	-0.357048	CT0
33.4755	-0.357052	CT0
33.4838	-0.357055	CT0
33.4925	-0.357058	CT0
33.5005	-0.357061	CT0
33.5086	-0.357064	CT0
33.5167	-0.357066	CT0
33.5249	-0.357068	CT0
33.533	-0.35707	CT0
33.5414	-0.357072	CT0
33.5492	-0.357074	CT0
33.5586	-0.357078	CT0
33.567	-0.357082	CT0
33.5744	-0.357085	CT0
33.5838	-0.357088	CT0
33.5915	-0.35709	CT0
33.6011	-0.357091	CT0
33.6084	-0.357092	CT0
33.6178	-0.357092	CT0
33.6259	-0.357092	CT0
33.634	-0.357092	CT0
33.643	-0.357089	CT0
33.6495	-0.357088	CT0
33.6586	-0.357088	CT0
33.6666	-0.357088	CT0
33.6746	-0.35709	CT0
33.6827	-0.357092	CT0
33.6911	-0.357095	CT0
33.7009	-0.357099	CT0
33.7087	-0.357103	CT0
33.7162	-0.357108	CT0
33.7258	-0.357111	CT0
33.7336	-0.357113	CT0
33.742	-0.357114	CT0
33.7497	-0.357115	CT0
33.7577	-0.357115	CT0
33.7664	-0.357114	CT0
33.7748	-0.357114	CT0
33.7835	-0.357114	CT0
33.7925	-0.357116	CT0
33.7999	-0.357119	CT0
33.8082	-0.357122	CT0
33.8168	-0.357126	CT0
33.8249	-0.357132	CT0
33.8337	-0.357136	CT0
33.8422	-0.357141	CT0
33.8498	-0.357144	CT0
33.8577	-0.357147	CT0
33.8659	-0.357149	CT0
33.8749	-0.357149	CT0
33.8836	-0.357148	CT0
33.8922	-0.357148	CT0
33.8997	-0.357145	CT0
33.9084	-0.357144	CT0
33.9179	-0.357143	CT0
33.9259	-0.357142	CT0
33.934	-0.357143	CT0
33.9412	-0.357144	CT0
33.95	-0.357146	CT0
33.9583	-0.357147	CT0
33.9658	-0.357149	CT0
33.9745	-0.357151	CT0
33.9828	-0.357152	CT0
33.9915	-0.357153	CT0
34	-0.357154	CT0
34.0076	-0.357154	CT0
34.0164	-0.357154	CT0
34.0246	-0.357154	CT0
34.0335	-0.357155	CT0
34.0412	-0.357156	CT0
34.0504	-0.357157	CT0
34.058	-0.357158	CT0
34.067	-0.357159	CT0
34.0756	-0.357159	CT0
34.0835	-0.35716	CT0
34.0922	-0.35716	CT0
34.0997	-0.35716	CT0
34.1079	-0.35716	CT0
34.1165	-0.35716	CT0
34.1251	-0.35716	CT0
34.1331	-0.357161	CT0
34.1412	-0.357161	CT0
34.1502	-0.35716	CT0
34.1581	-0.35716	CT0
34.1663	-0.35716	CT0
34.1754	-0.357161	CT0
34.1826	-0.35716	CT0
34.1915	-0.35716	CT0
34.1994	-0.357161	CT0
34.2084	-0.357162	CT0
34.2172	-0.357164	CT0
34.2244	-0.357166	CT0
34.2329	-0.357168	CT0
34.2422	-0.357169	CT0
34.2507	-0.35717	CT0
34.2583	-0.357171	CT0
34.268	-0.357171	CT0
34.2749	-0.357171	CT0
34.2833	-0.35717	CT0
34.291	-0.357168	CT0
34.3002	-0.357168	CT0
34.3074	-0.357167	CT0
34.3165	-0.357166	CT0
34.3245	-0.357165	CT0
34.3333	-0.357165	CT0
34.3425	-0.357167	CT0
34.3501	-0.357169	CT0
34.3588	-0.357171	CT0
34.3677	-0.357174	CT0
34.3758	-0.357176	CT0
34.3839	-0.357177	CT0
34.3923	-0.357178	CT0
34.3995	-0.357179	CT0
34.4088	-0.357178	CT0
34.4176	-0.357176	CT0
34.4256	-0.357174	CT0
34.4338	-0.357175	CT0
34.4423	-0.357176	CT0
34.4499	-0.357179	CT0
34.4586	-0.357181	CT0
34.4672	-0.357182	CT0
34.4752	-0.357183	CT0
34.4841	-0.357184	CT0
34.4922	-0.357186	CT0
34.5006	-0.357187	CT0
34.5089	-0.357188	CT0
34.5179	-0.357188	CT0
34.5254	-0.357189	CT0
34.5336	-0.357191	CT0
34.5423	-0.357193	CT0
34.5495	-0.357195	CT0
34.5592	-0.357196	CT0
34.566	-0.357197	CT0
34.5751	-0.357198	CT0
34.5838	-0.357198	CT0
34.5923	-0.3572	CT0
34.6009	-0.357201	CT0
34.6085	-0.357202	CT0
34.6175	-0.357204	CT0
34.6254	-0.357205	CT0
34.6341	-0.357205	CT0
34.6429	-0.357206	CT0
34.6507	-0.357207	CT0
34.6589	-0.357208	CT0
34.6672	-0.357209	CT0
34.6754	-0.35721	CT0
34.6841	-0.357211	CT0
34.6916	-0.357213	CT0
34.7006	-0.357214	CT0
34.7093	-0.357216	CT0
34.7177	-0.357218	CT0
34.7251	-0.35722	CT0
34.7343	-0.357222	CT0
34.7432	-0.357224	CT0
34.7511	-0.357225	CT0
34.7587	-0.357227	CT0
34.7669	-0.35723	CT0
34.7755	-0.357232	CT0
34.7836	-0.357233	CT0
34.792	-0.357233	CT0
34.8004	-0.357233	CT0
34.8099	-0.357233	CT0
34.8163	-0.357234	CT0
34.8252	-0.357234	CT0
34.8344	-0.357235	CT0
34.842	-0.357236	CT0
34.8507	-0.357238	CT0
34.8589	-0.35724	CT0
34.8674	-0.357243	CT0
34.8755	-0.357247	CT0
34.8844	-0.35725	CT0
34.892	-0.357253	CT0
34.9012	-0.357254	CT0
34.9103	-0.357255	CT0
34.9179	-0.357255	CT0
34.927	-0.357254	CT0
34.9352	-0.357254	CT0
34.942	-0.357252	CT0
34.9505	-0.35725	CT0
34.959	-0.357247	CT0
34.9671	-0.357245	CT0
34.9759	-0.357245	CT0
34.9849	-0.357246	CT0
34.9931	-0.357246	CT0
35.0014	-0.357246	CT0
35.0101	-0.357246	CT0
35.0181	-0.357247	CT0
35.0268	-0.357246	CT0
35.0355	-0.357246	CT0
35.0426	-0.357246	CT0
35.0517	-0.357245	CT0
35.06	-0.357244	CT0
35.0677	-0.357243	CT0
35.0763	-0.357243	CT0
35.0848	-0.357243	CT0
35.0933	-0.357244	CT0
35.1015	-0.357246	CT0
35.1094	-0.357248	CT0
35.118	-0.357249	CT0
35.1273	-0.357251	CT0
35.1344	-0.357253	CT0
35.1431	-0.357254	CT0
35.1522	-0.357255	CT0
35.1601	-0.357256	CT0
35.1676	-0.357257	CT0
35.1764	-0.357257	CT0
35.184	-0.357257	CT0
35.193	-0.357257	CT0
35.2007	-0.357257	CT0
35.2088	-0.357258	CT0
35.2175	-0.357258	CT0
35.2262	-0.35726	CT0
35.2346	-0.357261	CT0
35.2429	-0.357262	CT0
35.251	-0.357263	CT0
35.26	-0.357264	CT0
35.268	-0.357265	CT0
[truncated: 22,004 more rows]

## Sheet: Trehalose_points
Temperature	adjusted_heatflow
32.5815	-0.323534
40.4769	-0.323253
32.7292	-0.329312
40.7226	-0.329233
32.6838	-0.333884
40.8768	-0.334658
33.2952	-0.341106
41.297	-0.341069
36.8886	-0.345909
46.7914	-0.346414

## Sheet: Sucrose
Temperature	Heat Flow (Normalized)	Samples
20.0163	-0.0133508	CS0
20.0163	-0.0133518	CS0
20.0167	-0.0133532	CS0
20.0167	-0.013355	CS0
20.0169	-0.0133564	CS0
20.0159	-0.0133574	CS0
20.0171	-0.0133581	CS0
20.0158	-0.0133588	CS0
20.0166	-0.0133593	CS0
20.0162	-0.0133596	CS0
20.0168	-0.0133599	CS0
20.0166	-0.0133602	CS0
20.0165	-0.0133604	CS0
20.0163	-0.0133605	CS0
20.0165	-0.0133605	CS0
20.0163	-0.0133609	CS0
20.0168	-0.0133618	CS0
20.0173	-0.0133627	CS0
20.0175	-0.0133636	CS0
20.0172	-0.0133646	CS0
20.019	-0.0133656	CS0
20.0187	-0.0133665	CS0
20.0192	-0.0133673	CS0
20.0196	-0.0133675	CS0
20.0191	-0.0133671	CS0
20.0196	-0.0133662	CS0
20.02	-0.0133651	CS0
20.0194	-0.0133648	CS0
20.02	-0.013365	CS0
20.0222	-0.0133648	CS0
20.0219	-0.0133644	CS0
20.0229	-0.0133641	CS0
20.0232	-0.0133635	CS0
20.0238	-0.0133633	CS0
20.0242	-0.0133632	CS0
20.0252	-0.0133628	CS0
20.0266	-0.0133624	CS0
20.0266	-0.0133613	CS0
20.0286	-0.0133607	CS0
20.0301	-0.01336	CS0
20.0317	-0.0133587	CS0
20.0328	-0.0133573	CS0
20.0337	-0.0133556	CS0
20.0352	-0.0133539	CS0
20.0364	-0.0133521	CS0
20.0367	-0.0133498	CS0
20.0388	-0.0133473	CS0
20.0418	-0.0133448	CS0
20.0429	-0.0133419	CS0
20.0444	-0.013338	CS0
20.0468	-0.0133324	CS0
20.0487	-0.0133255	CS0
20.0511	-0.0133144	CS0
20.0531	-0.0133075	CS0
20.0557	-0.0133003	CS0
20.0581	-0.0132952	CS0
20.0602	-0.0132915	CS0
20.0626	-0.0132879	CS0
20.0654	-0.0132826	CS0
20.0687	-0.0132766	CS0
20.0709	-0.0132698	CS0
20.0741	-0.0132657	CS0
20.0772	-0.0132619	CS0
20.0798	-0.0132587	CS0
20.0832	-0.0132554	CS0
20.0861	-0.0132519	CS0
20.0881	-0.0132497	CS0
20.0921	-0.0132489	CS0
20.0954	-0.0132496	CS0
20.0993	-0.0132504	CS0
20.1018	-0.0132514	CS0
20.1068	-0.0132547	CS0
20.1105	-0.0132621	CS0
20.1152	-0.0132742	CS0
20.1184	-0.0132907	CS0
20.1217	-0.0133199	CS0
20.1249	-0.0133507	CS0
20.1284	-0.0134082	CS0
20.1329	-0.013497	CS0
20.137	-0.013634	CS0
20.142	-0.013817	CS0
20.1455	-0.0140559	CS0
20.1504	-0.0143046	CS0
20.155	-0.0146255	CS0
20.1593	-0.0149897	CS0
20.1639	-0.0154047	CS0
20.1684	-0.0158549	CS0
20.1727	-0.0163687	CS0
20.1772	-0.0168045	CS0
20.1824	-0.0172264	CS0
20.1874	-0.0176681	CS0
20.1912	-0.0180867	CS0
20.1966	-0.0184984	CS0
20.2006	-0.0188845	CS0
20.2064	-0.019288	CS0
20.2118	-0.0197483	CS0
20.2173	-0.0202739	CS0
20.2231	-0.0207089	CS0
20.2268	-0.021239	CS0
20.2326	-0.0216287	CS0
20.2377	-0.0220553	CS0
20.2427	-0.0225719	CS0
20.2477	-0.0230839	CS0
20.253	-0.0237141	CS0
20.2577	-0.0242052	CS0
20.2632	-0.0247605	CS0
20.2685	-0.0253433	CS0
20.2746	-0.0259841	CS0
20.28	-0.0266382	CS0
20.285	-0.0272508	CS0
20.2896	-0.0277488	CS0
20.2962	-0.0283668	CS0
20.3012	-0.028922	CS0
20.3067	-0.0296188	CS0
20.3121	-0.0303625	CS0
20.3176	-0.0309834	CS0
20.3231	-0.0317108	CS0
20.328	-0.0324092	CS0
20.334	-0.0331166	CS0
20.3398	-0.0339013	CS0
20.3449	-0.0345178	CS0
20.3512	-0.0352183	CS0
20.3571	-0.035953	CS0
20.3634	-0.0367084	CS0
20.3695	-0.037502	CS0
20.375	-0.0383948	CS0
20.3806	-0.0392719	CS0
20.3872	-0.0400512	CS0
20.3921	-0.0408625	CS0
20.3979	-0.0416922	CS0
20.4031	-0.0424511	CS0
20.4094	-0.0432107	CS0
20.4148	-0.0439774	CS0
20.421	-0.0447369	CS0
20.4267	-0.0454841	CS0
20.4324	-0.0463595	CS0
20.4379	-0.047098	CS0
20.4446	-0.0478939	CS0
20.4496	-0.0488453	CS0
20.456	-0.0497908	CS0
20.4609	-0.0505903	CS0
20.4669	-0.0513217	CS0
20.4738	-0.0521794	CS0
20.4796	-0.0530845	CS0
20.4855	-0.0538334	CS0
20.4919	-0.0546542	CS0
20.4979	-0.0555639	CS0
20.504	-0.0563039	CS0
20.51	-0.0572092	CS0
20.5149	-0.0582898	CS0
20.5202	-0.0592117	CS0
20.5272	-0.060105	CS0
20.5328	-0.0609115	CS0
20.5382	-0.0617792	CS0
20.5453	-0.0626004	CS0
20.5515	-0.0633923	CS0
20.5583	-0.0642204	CS0
20.5634	-0.0651455	CS0
20.5686	-0.0659415	CS0
20.5742	-0.0668241	CS0
20.5809	-0.0677273	CS0
20.5874	-0.0685897	CS0
20.5939	-0.0694732	CS0
20.5993	-0.0703338	CS0
20.605	-0.0713507	CS0
20.6113	-0.0723655	CS0
20.6175	-0.073246	CS0
20.6237	-0.0741476	CS0
20.6289	-0.0749933	CS0
20.6355	-0.0758096	CS0
20.6425	-0.0766755	CS0
20.6478	-0.0774266	CS0
20.6537	-0.0781508	CS0
20.6603	-0.079021	CS0
20.6663	-0.079855	CS0
20.6726	-0.0807531	CS0
20.6788	-0.081666	CS0
20.6857	-0.0826757	CS0
20.6911	-0.0834763	CS0
20.6975	-0.0842943	CS0
20.704	-0.0851217	CS0
20.7093	-0.0858799	CS0
20.7155	-0.0867074	CS0
20.7216	-0.0875112	CS0
20.7282	-0.0884222	CS0
20.7343	-0.0893678	CS0
20.7398	-0.0903766	CS0
20.7468	-0.0912551	CS0
20.7524	-0.0922614	CS0
20.7593	-0.0929788	CS0
20.7644	-0.0938023	CS0
20.7715	-0.0946098	CS0
20.7782	-0.0953832	CS0
20.7834	-0.0962896	CS0
20.7909	-0.0971429	CS0
20.7963	-0.0979707	CS0
20.8034	-0.0989577	CS0
20.8093	-0.0997636	CS0
20.8162	-0.100495	CS0
20.8215	-0.101272	CS0
20.8287	-0.101958	CS0
20.835	-0.102733	CS0
20.8409	-0.103373	CS0
20.8473	-0.104183	CS0
20.8531	-0.104983	CS0
20.8604	-0.105849	CS0
20.8664	-0.106647	CS0
20.8722	-0.107656	CS0
20.8793	-0.108566	CS0
20.8856	-0.109421	CS0
20.8928	-0.110242	CS0
20.899	-0.11098	CS0
20.9052	-0.111832	CS0
20.9113	-0.112536	CS0
20.9176	-0.113343	CS0
20.9243	-0.11408	CS0
20.9306	-0.114816	CS0
20.9377	-0.115443	CS0
20.9442	-0.116118	CS0
20.9495	-0.116858	CS0
20.9567	-0.117691	CS0
20.9635	-0.118465	CS0
20.9696	-0.119337	CS0
20.9756	-0.120138	CS0
20.9825	-0.120932	CS0
20.989	-0.121737	CS0
20.9956	-0.122538	CS0
21.0024	-0.123239	CS0
21.0093	-0.123975	CS0
21.0153	-0.124604	CS0
21.022	-0.125236	CS0
21.0285	-0.125938	CS0
21.0347	-0.126673	CS0
21.0417	-0.127515	CS0
21.0484	-0.128355	CS0
21.0539	-0.129292	CS0
21.0617	-0.130053	CS0
21.0675	-0.130824	CS0
21.0744	-0.131524	CS0
21.0812	-0.132266	CS0
21.0876	-0.132937	CS0
21.0942	-0.133711	CS0
21.1013	-0.134506	CS0
21.1069	-0.135231	CS0
21.1137	-0.135944	CS0
21.1207	-0.136616	CS0
21.1276	-0.1375	CS0
21.1328	-0.138152	CS0
21.14	-0.138898	CS0
21.1471	-0.139474	CS0
21.1538	-0.140141	CS0
21.1612	-0.140708	CS0
21.1676	-0.141426	CS0
21.1748	-0.142065	CS0
21.1813	-0.142608	CS0
21.1879	-0.143139	CS0
21.1945	-0.143814	CS0
21.2008	-0.144469	CS0
21.2078	-0.145306	CS0
21.2143	-0.146023	CS0
21.221	-0.146727	CS0
21.2284	-0.147352	CS0
21.2344	-0.148147	CS0
21.2411	-0.148875	CS0
21.2483	-0.149734	CS0
21.2559	-0.150414	CS0
21.2635	-0.151182	CS0
21.27	-0.151898	CS0
21.2765	-0.152404	CS0
21.2831	-0.153152	CS0
21.2904	-0.153731	CS0
21.2973	-0.154209	CS0
21.3033	-0.15469	CS0
21.3098	-0.155216	CS0
21.3165	-0.155812	CS0
21.3238	-0.156569	CS0
21.3309	-0.157368	CS0
21.3369	-0.158051	CS0
21.3444	-0.158673	CS0
21.3515	-0.159155	CS0
21.3585	-0.15976	CS0
21.3659	-0.160507	CS0
21.3721	-0.161015	CS0
21.3795	-0.161574	CS0
21.3862	-0.162202	CS0
21.3923	-0.162842	CS0
21.3995	-0.163503	CS0
21.4071	-0.164192	CS0
21.4135	-0.164844	CS0
21.4215	-0.165437	CS0
21.4273	-0.166055	CS0
21.4352	-0.166681	CS0
21.4405	-0.167261	CS0
21.4476	-0.167888	CS0
21.455	-0.168475	CS0
21.4633	-0.16907	CS0
21.4691	-0.169608	CS0
21.4754	-0.170208	CS0
21.4826	-0.170768	CS0
21.4896	-0.171418	CS0
21.4985	-0.172099	CS0
21.504	-0.17278	CS0
21.5114	-0.173408	CS0
21.5191	-0.173871	CS0
21.5254	-0.174531	CS0
21.533	-0.174997	CS0
21.5396	-0.17546	CS0
21.5467	-0.176031	CS0
21.5525	-0.176507	CS0
21.5613	-0.177043	CS0
21.5664	-0.177606	CS0
21.5752	-0.178179	CS0
21.5815	-0.178689	CS0
21.5895	-0.1792	CS0
21.5956	-0.179802	CS0
21.6023	-0.180347	CS0
21.6103	-0.18085	CS0
21.617	-0.181392	CS0
21.6239	-0.182031	CS0
21.6308	-0.18275	CS0
21.6382	-0.183359	CS0
21.645	-0.183778	CS0
21.6521	-0.184376	CS0
21.6602	-0.18481	CS0
21.666	-0.18526	CS0
21.6728	-0.185815	CS0
21.6814	-0.186318	CS0
21.6885	-0.186794	CS0
21.6962	-0.187398	CS0
21.7027	-0.187921	CS0
21.7103	-0.18864	CS0
21.7174	-0.189116	CS0
21.724	-0.189624	CS0
21.7319	-0.190037	CS0
21.7389	-0.190454	CS0
21.7457	-0.190869	CS0
21.7527	-0.191364	CS0
21.7598	-0.191821	CS0
21.7669	-0.192376	CS0
21.7741	-0.192874	CS0
21.7817	-0.193467	CS0
21.7883	-0.194187	CS0
21.7956	-0.194717	CS0
21.8032	-0.195286	CS0
21.8093	-0.195795	CS0
21.8179	-0.196238	CS0
21.8246	-0.196598	CS0
21.8311	-0.19708	CS0
21.8392	-0.197451	CS0
21.8461	-0.19789	CS0
21.8546	-0.198361	CS0
21.8605	-0.198715	CS0
21.8681	-0.199241	CS0
21.876	-0.199727	CS0
21.883	-0.200241	CS0
21.8897	-0.200726	CS0
21.8975	-0.20118	CS0
21.9051	-0.201632	CS0
21.9122	-0.202018	CS0
21.9189	-0.202471	CS0
21.9268	-0.202948	CS0
21.9336	-0.203361	CS0
21.9409	-0.203763	CS0
21.9479	-0.204348	CS0
21.9554	-0.204816	CS0
21.9632	-0.205431	CS0
21.9702	-0.205941	CS0
21.9773	-0.206315	CS0
21.9845	-0.206747	CS0
21.9914	-0.207057	CS0
21.9992	-0.207417	CS0
22.0069	-0.207878	CS0
22.0142	-0.208285	CS0
22.0217	-0.208787	CS0
22.03	-0.209232	CS0
22.0366	-0.209694	CS0
22.0441	-0.210136	CS0
22.0512	-0.210656	CS0
22.0587	-0.21108	CS0
22.0662	-0.21148	CS0
22.0738	-0.211803	CS0
22.0819	-0.212228	CS0
22.0888	-0.212567	CS0
22.0957	-0.213025	CS0
22.1028	-0.213577	CS0
22.11	-0.214139	CS0
22.1181	-0.214642	CS0
22.125	-0.215044	CS0
22.1317	-0.215431	CS0
22.1392	-0.215699	CS0
22.148	-0.215975	CS0
22.1541	-0.216409	CS0
22.1615	-0.216742	CS0
22.1701	-0.217086	CS0
22.1766	-0.217469	CS0
22.1847	-0.217863	CS0
22.1921	-0.218355	CS0
22.1997	-0.218739	CS0
22.2073	-0.219199	CS0
22.2142	-0.219615	CS0
22.2214	-0.220011	CS0
22.2284	-0.220437	CS0
22.2362	-0.220916	CS0
22.2444	-0.221246	CS0
22.2519	-0.221701	CS0
22.2605	-0.222064	CS0
22.2676	-0.222414	CS0
22.2738	-0.222757	CS0
22.2808	-0.223024	CS0
22.2889	-0.223395	CS0
22.2971	-0.223762	CS0
22.3045	-0.224109	CS0
22.3108	-0.224465	CS0
22.3189	-0.224766	CS0
22.3262	-0.225199	CS0
22.3342	-0.225504	CS0
22.3426	-0.225854	CS0
22.3496	-0.226176	CS0
22.3572	-0.226592	CS0
22.3643	-0.226945	CS0
22.372	-0.227411	CS0
22.3796	-0.227837	CS0
22.3873	-0.228255	CS0
22.3941	-0.228622	CS0
22.4029	-0.228978	CS0
22.4099	-0.229377	CS0
22.4177	-0.229687	CS0
22.4248	-0.229955	CS0
22.433	-0.230205	CS0
22.4398	-0.230572	CS0
22.4468	-0.230894	CS0
22.4555	-0.231193	CS0
22.4634	-0.231543	CS0
22.4703	-0.231935	CS0
22.4774	-0.232236	CS0
22.4857	-0.232514	CS0
22.4927	-0.232837	CS0
22.5004	-0.233135	CS0
22.508	-0.233443	CS0
22.5156	-0.233868	CS0
22.5242	-0.2343	CS0
22.5311	-0.234582	CS0
22.5382	-0.234923	CS0
22.5472	-0.235357	CS0
22.5543	-0.235702	CS0
22.5619	-0.235924	CS0
22.5692	-0.236233	CS0
22.5766	-0.236431	CS0
22.5843	-0.236796	CS0
22.5914	-0.237232	CS0
22.5998	-0.237667	CS0
22.6062	-0.238124	CS0
22.614	-0.238344	CS0
22.6225	-0.238605	CS0
22.6305	-0.238928	CS0
22.6377	-0.239256	CS0
22.6458	-0.23938	CS0
22.6533	-0.239552	CS0
22.6602	-0.239747	CS0
22.6687	-0.239976	CS0
22.6763	-0.24035	CS0
22.6847	-0.24068	CS0
22.6921	-0.241072	CS0
22.7	-0.241395	CS0
22.7065	-0.241598	CS0
22.7142	-0.241906	CS0
22.7218	-0.242154	CS0
22.7296	-0.242537	CS0
22.7379	-0.24277	CS0
22.7445	-0.242976	CS0
22.7528	-0.243416	CS0
22.7605	-0.243815	CS0
22.7679	-0.244201	CS0
22.7761	-0.24455	CS0
22.7836	-0.244833	CS0
22.7918	-0.245182	CS0
22.7994	-0.245499	CS0
22.8058	-0.245878	CS0
22.8135	-0.246161	CS0
22.8229	-0.246366	CS0
22.8307	-0.246467	CS0
22.8373	-0.24654	CS0
22.8455	-0.246815	CS0
22.8525	-0.247036	CS0
22.8605	-0.247253	CS0
22.8685	-0.247418	CS0
22.8764	-0.247726	CS0
22.884	-0.248199	CS0
22.8919	-0.248651	CS0
22.8996	-0.248982	CS0
22.9071	-0.24937	CS0
22.9157	-0.249533	CS0
22.9232	-0.249705	CS0
22.9305	-0.249902	CS0
22.9391	-0.250104	CS0
22.9465	-0.250257	CS0
22.9541	-0.250481	CS0
22.9617	-0.250726	CS0
22.9692	-0.25115	CS0
22.9775	-0.251367	CS0
22.986	-0.251698	CS0
22.993	-0.252067	CS0
23.0006	-0.252384	CS0
23.0089	-0.252659	CS0
23.0167	-0.252892	CS0
23.0243	-0.253167	CS0
23.032	-0.253224	CS0
23.0401	-0.253481	CS0
23.0464	-0.253833	CS0
23.0548	-0.254123	CS0
23.0628	-0.254245	CS0
23.0704	-0.254353	CS0
23.0787	-0.254475	CS0
23.0859	-0.254685	CS0
23.0936	-0.254968	CS0
23.1017	-0.255211	CS0
23.1096	-0.255571	CS0
23.1169	-0.255922	CS0
23.1257	-0.256229	CS0
23.1332	-0.256525	CS0
23.1418	-0.256723	CS0
23.1494	-0.257013	CS0
23.1566	-0.257201	CS0
23.1642	-0.257322	CS0
23.1717	-0.257468	CS0
23.1791	-0.257672	CS0
23.1868	-0.25786	CS0
23.1945	-0.258074	CS0
23.202	-0.258364	CS0
23.21	-0.258601	CS0
23.2187	-0.258899	CS0
23.2269	-0.259019	CS0
23.2349	-0.259293	CS0
23.2422	-0.259764	CS0
23.2507	-0.260012	CS0
23.2583	-0.260256	CS0
23.2656	-0.260482	CS0
23.2734	-0.260669	CS0
23.2812	-0.260677	CS0
23.2895	-0.260755	CS0
23.2961	-0.260788	CS0
23.305	-0.261071	CS0
23.3128	-0.261277	CS0
23.3203	-0.261626	CS0
23.328	-0.262073	CS0
23.3359	-0.262335	CS0
23.3445	-0.262575	CS0
23.3519	-0.262897	CS0
23.3592	-0.26305	CS0
23.3673	-0.263214	CS0
23.3758	-0.263226	CS0
23.3828	-0.263275	CS0
23.3906	-0.263567	CS0
23.3985	-0.263788	CS0
23.4064	-0.264019	CS0
23.4151	-0.264226	CS0
23.4226	-0.264528	CS0
23.4312	-0.264703	CS0
23.4385	-0.264856	CS0
23.4462	-0.265068	CS0
23.4538	-0.265246	CS0
23.4628	-0.265346	CS0
23.4701	-0.265554	CS0
23.4778	-0.265761	CS0
23.4862	-0.26596	CS0
23.4937	-0.266195	CS0
23.5013	-0.266268	CS0
23.5094	-0.266463	CS0
23.5163	-0.266656	CS0
23.525	-0.266898	CS0
23.534	-0.266933	CS0
23.5409	-0.267083	CS0
23.5488	-0.267271	CS0
23.5576	-0.267402	CS0
23.5649	-0.267689	CS0
23.5727	-0.267883	CS0
23.5819	-0.267993	CS0
23.5889	-0.268214	CS0
23.5971	-0.268421	CS0
23.6053	-0.268581	CS0
23.6126	-0.26889	CS0
23.6205	-0.26901	CS0
23.6288	-0.269174	CS0
23.6368	-0.269407	CS0
23.6448	-0.269644	CS0
23.6517	-0.27001	CS0
23.6602	-0.270182	CS0
23.6677	-0.270302	CS0
23.6767	-0.270475	CS0
23.6845	-0.270708	CS0
23.6924	-0.270764	CS0
23.6993	-0.27099	CS0
23.7077	-0.271133	CS0
23.7157	-0.271178	CS0
23.724	-0.271248	CS0
23.7317	-0.27134	CS0
23.7396	-0.271463	CS0
23.7468	-0.271567	CS0
23.7554	-0.271841	CS0
23.7629	-0.272	CS0
23.771	-0.272169	CS0
23.7788	-0.272426	CS0
23.7886	-0.272804	CS0
23.7948	-0.273071	CS0
23.8037	-0.273282	CS0
23.8111	-0.273488	CS0
23.8184	-0.273556	CS0
23.827	-0.273559	CS0
23.8345	-0.273564	CS0
23.8439	-0.273644	CS0
23.8513	-0.273715	CS0
23.8595	-0.273723	CS0
23.8672	-0.273758	CS0
23.8758	-0.273928	CS0
23.8832	-0.274082	CS0
23.8917	-0.274352	CS0
23.8999	-0.274666	CS0
23.9071	-0.275001	CS0
23.9143	-0.275183	CS0
23.9232	-0.275353	CS0
23.9307	-0.27553	CS0
23.9387	-0.275741	CS0
23.9474	-0.275922	CS0
23.9552	-0.276097	CS0
23.9624	-0.276319	CS0
23.9715	-0.276419	CS0
23.9788	-0.27659	CS0
23.9874	-0.276676	CS0
23.9955	-0.276782	CS0
24.0033	-0.276934	CS0
24.0117	-0.276983	CS0
24.0186	-0.277086	CS0
24.0273	-0.277182	CS0
24.0354	-0.277321	CS0
24.0441	-0.277397	CS0
24.0511	-0.277528	CS0
24.0591	-0.277629	CS0
24.0682	-0.277718	CS0
24.0756	-0.277976	CS0
24.0825	-0.27827	CS0
24.0914	-0.278473	CS0
24.0996	-0.278583	CS0
24.1071	-0.278666	CS0
24.1149	-0.278818	CS0
24.1231	-0.27908	CS0
24.1319	-0.279197	CS0
24.1398	-0.279343	CS0
24.1479	-0.279357	CS0
24.1558	-0.279397	CS0
24.1639	-0.27954	CS0
24.1729	-0.279707	CS0
24.1794	-0.279882	CS0
24.188	-0.279904	CS0
24.1962	-0.279954	CS0
24.2045	-0.280045	CS0
24.2118	-0.28019	CS0
24.2205	-0.280335	CS0
24.2275	-0.280446	CS0
24.2364	-0.280571	CS0
24.2438	-0.280719	CS0
24.2517	-0.280972	CS0
24.2599	-0.281222	CS0
24.2682	-0.281403	CS0
24.2756	-0.281445	CS0
24.2839	-0.281486	CS0
24.2923	-0.281648	CS0
24.3002	-0.28182	CS0
24.3085	-0.281937	CS0
24.3164	-0.282039	CS0
24.3243	-0.282137	CS0
24.3327	-0.282239	CS0
24.3407	-0.282326	CS0
24.349	-0.282477	CS0
24.357	-0.282611	CS0
24.3654	-0.282678	CS0
24.3728	-0.2828	CS0
24.3813	-0.282901	CS0
24.3896	-0.283057	CS0
24.3977	-0.283208	CS0
24.4058	-0.283427	CS0
24.4145	-0.283579	CS0
24.422	-0.283713	CS0
24.4302	-0.283763	CS0
24.4375	-0.283815	CS0
24.4459	-0.283843	CS0
24.4537	-0.283898	CS0
24.462	-0.283971	CS0
24.4707	-0.284051	CS0
24.4776	-0.284179	CS0
24.4868	-0.284264	CS0
24.4943	-0.284377	CS0
24.5026	-0.284507	CS0
24.5099	-0.284659	CS0
24.5177	-0.284781	CS0
24.5274	-0.284884	CS0
24.5352	-0.285011	CS0
24.5427	-0.28514	CS0
24.5515	-0.285284	CS0
24.5591	-0.28538	CS0
24.5674	-0.285547	CS0
24.5756	-0.285645	CS0
24.5844	-0.285737	CS0
24.5917	-0.285841	CS0
24.599	-0.286008	CS0
24.6076	-0.286162	CS0
24.6157	-0.286312	CS0
24.6238	-0.286529	CS0
24.6319	-0.28666	CS0
24.64	-0.286775	CS0
24.6487	-0.286911	CS0
24.6569	-0.287	CS0
24.6641	-0.287043	CS0
24.673	-0.28704	CS0
24.68	-0.287039	CS0
24.6885	-0.287073	CS0
24.6971	-0.287102	CS0
24.7057	-0.287167	CS0
24.7127	-0.287263	CS0
24.7219	-0.287324	CS0
24.7306	-0.287463	CS0
24.7378	-0.287621	CS0
24.7458	-0.287746	CS0
24.7539	-0.287862	CS0
24.7618	-0.287996	CS0
24.7701	-0.28812	CS0
24.778	-0.288293	CS0
24.7854	-0.288432	CS0
24.7944	-0.288571	CS0
24.8022	-0.288682	CS0
24.8114	-0.288736	CS0
24.8195	-0.288805	CS0
24.828	-0.288857	CS0
24.8343	-0.288906	CS0
24.8429	-0.288955	CS0
24.851	-0.289001	CS0
24.8588	-0.289045	CS0
24.8665	-0.289108	CS0
24.8752	-0.289147	CS0
24.8827	-0.289207	CS0
24.891	-0.289318	CS0
24.899	-0.289428	CS0
24.908	-0.289513	CS0
24.9158	-0.289619	CS0
24.9245	-0.289756	CS0
24.9322	-0.289916	CS0
24.9407	-0.290044	CS0
24.9477	-0.290159	CS0
24.9562	-0.290251	CS0
24.9643	-0.290331	CS0
24.9724	-0.290403	CS0
24.9806	-0.290482	CS0
24.9884	-0.290554	CS0
24.997	-0.29063	CS0
25.0053	-0.290717	CS0
25.0147	-0.290842	CS0
25.0214	-0.29097	CS0
25.0303	-0.291052	CS0
25.0384	-0.29111	CS0
25.046	-0.291155	CS0
25.0548	-0.291175	CS0
25.0625	-0.291213	CS0
25.0705	-0.291261	CS0
25.0779	-0.291334	CS0
25.0851	-0.291418	CS0
25.0947	-0.29154	CS0
25.1026	-0.291733	CS0
25.1109	-0.291903	CS0
25.1195	-0.292083	CS0
25.1278	-0.292219	CS0
25.1359	-0.292286	CS0
25.1434	-0.29232	CS0
25.1531	-0.292352	CS0
25.1611	-0.292364	CS0
25.1684	-0.292384	CS0
25.177	-0.292402	CS0
25.1851	-0.292418	CS0
25.1934	-0.292462	CS0
25.2019	-0.2925	CS0
25.2103	-0.292542	CS0
25.2176	-0.29261	CS0
25.2262	-0.292663	CS0
25.2339	-0.29275	CS0
25.2414	-0.29284	CS0
25.2498	-0.292952	CS0
25.2585	-0.29305	CS0
25.2671	-0.293143	CS0
25.2743	-0.293218	CS0
25.2837	-0.293311	CS0
25.2906	-0.293368	CS0
25.3004	-0.293403	CS0
25.3083	-0.293447	CS0
25.3162	-0.293488	CS0
25.3243	-0.293559	CS0
25.3328	-0.293651	CS0
25.3411	-0.293745	CS0
25.3488	-0.293842	CS0
25.3565	-0.293995	CS0
25.365	-0.294141	CS0
25.3733	-0.294296	CS0
25.3812	-0.294399	CS0
25.3886	-0.294471	CS0
25.397	-0.294526	CS0
25.4059	-0.294572	CS0
25.413	-0.294615	CS0
25.4221	-0.294661	CS0
25.4311	-0.294702	CS0
25.4382	-0.294728	CS0
25.4465	-0.294783	CS0
25.4544	-0.294866	CS0
25.4627	-0.294949	CS0
25.4709	-0.295017	CS0
25.4792	-0.295058	CS0
25.4877	-0.295091	CS0
25.4954	-0.295134	CS0
25.5048	-0.295201	CS0
25.5123	-0.295296	CS0
25.5204	-0.295409	CS0
25.5287	-0.295505	CS0
25.5364	-0.295605	CS0
25.5441	-0.295706	CS0
25.5537	-0.295757	CS0
25.5612	-0.295795	CS0
25.57	-0.295812	CS0
25.5783	-0.295825	CS0
25.5854	-0.295835	CS0
25.5933	-0.295846	CS0
25.6019	-0.295865	CS0
25.6102	-0.295904	CS0
25.6193	-0.295964	CS0
25.6265	-0.296033	CS0
25.6354	-0.296119	CS0
25.6436	-0.296207	CS0
25.6519	-0.296262	CS0
25.6602	-0.296299	CS0
25.6674	-0.296342	CS0
25.6762	-0.296388	CS0
25.684	-0.296428	CS0
25.6923	-0.296473	CS0
25.7009	-0.296502	CS0
25.7095	-0.296574	CS0
25.7173	-0.296626	CS0
25.7258	-0.296672	CS0
25.7341	-0.296749	CS0
25.7432	-0.296809	CS0
25.7504	-0.296854	CS0
25.7585	-0.296906	CS0
25.7675	-0.296948	CS0
25.7751	-0.297002	CS0
25.7839	-0.297064	CS0
25.7907	-0.297121	CS0
25.7991	-0.297196	CS0
25.8071	-0.297284	CS0
25.8162	-0.297362	CS0
25.8245	-0.297469	CS0
25.8325	-0.29754	CS0
25.8405	-0.297615	CS0
25.8488	-0.297688	CS0
25.8565	-0.297742	CS0
25.8651	-0.297789	CS0
25.8733	-0.297831	CS0
25.8811	-0.297865	CS0
25.8885	-0.297898	CS0
25.8972	-0.297941	CS0
25.9062	-0.297992	CS0
25.9139	-0.298024	CS0
25.9221	-0.298047	CS0
25.9303	-0.298084	CS0
25.9382	-0.298131	CS0
25.9456	-0.298193	CS0
25.955	-0.298266	CS0
25.9629	-0.298348	CS0
25.9728	-0.29845	CS0
25.9796	-0.298557	CS0
25.9889	-0.29862	CS0
25.9961	-0.29868	CS0
26.0048	-0.298719	CS0
26.012	-0.298756	CS0
26.0209	-0.298788	CS0
26.0287	-0.298816	CS0
26.0374	-0.298838	CS0
26.0448	-0.298863	CS0
26.0533	-0.298883	CS0
26.0622	-0.298913	CS0
26.0697	-0.298943	CS0
26.0785	-0.298984	CS0
26.086	-0.299046	CS0
26.095	-0.299117	CS0
26.1042	-0.299174	CS0
26.1114	-0.299237	CS0
26.1206	-0.299295	CS0
26.1274	-0.299344	CS0
26.1357	-0.299391	CS0
26.145	-0.299423	CS0
26.1526	-0.29945	CS0
26.1615	-0.299471	CS0
26.1688	-0.299498	CS0
26.1771	-0.299526	CS0
26.1856	-0.299563	CS0
26.1935	-0.299597	CS0
26.2023	-0.299623	CS0
26.2099	-0.299658	CS0
26.2186	-0.299713	CS0
26.2271	-0.29979	CS0
26.2359	-0.299839	CS0
26.2431	-0.299898	CS0
26.2517	-0.30001	CS0
26.2595	-0.300092	CS0
26.2684	-0.300145	CS0
26.2758	-0.300185	CS0
26.2845	-0.300219	CS0
26.2934	-0.300242	CS0
26.3014	-0.300274	CS0
26.3094	-0.300303	CS0
26.3172	-0.300343	CS0
26.3256	-0.300364	CS0
26.3341	-0.300375	CS0
26.3422	-0.300415	CS0
26.3504	-0.300455	CS0
26.3595	-0.300498	CS0
26.3684	-0.30053	CS0
26.3766	-0.300567	CS0
26.3837	-0.300598	CS0
26.393	-0.300627	CS0
26.4012	-0.300673	CS0
26.4102	-0.300715	CS0
26.4166	-0.300751	CS0
26.4251	-0.300783	CS0
26.4331	-0.300824	CS0
26.4419	-0.300862	CS0
26.4504	-0.300901	CS0
26.4584	-0.300937	CS0
26.4674	-0.300975	CS0
26.4739	-0.301007	CS0
26.4836	-0.301038	CS0
26.4914	-0.301077	CS0
26.4992	-0.301119	CS0
26.5077	-0.301167	CS0
26.5163	-0.301205	CS0
26.5235	-0.301251	CS0
26.5323	-0.30128	CS0
26.541	-0.30131	CS0
26.5487	-0.301328	CS0
26.5566	-0.301344	CS0
26.5653	-0.301359	CS0
26.5735	-0.301382	CS0
26.5823	-0.301406	CS0
26.5907	-0.301445	CS0
26.5988	-0.301523	CS0
26.6073	-0.301596	CS0
26.6164	-0.301669	CS0
26.6228	-0.301718	CS0
26.6323	-0.301769	CS0
26.6409	-0.301811	CS0
26.6487	-0.301848	CS0
26.6564	-0.30187	CS0
26.666	-0.301896	CS0
26.6735	-0.301917	CS0
26.6823	-0.30194	CS0
26.6892	-0.301977	CS0
26.6984	-0.302005	CS0
26.7066	-0.30203	CS0
26.7153	-0.302048	CS0
26.7225	-0.302068	CS0
26.7309	-0.302121	CS0
26.7391	-0.302177	CS0
26.7471	-0.302226	CS0
26.7556	-0.302267	CS0
26.7644	-0.302312	CS0
26.7727	-0.302362	CS0
26.7812	-0.302398	CS0
26.7884	-0.302424	CS0
26.7966	-0.30244	CS0
26.8043	-0.302448	CS0
26.8137	-0.302477	CS0
26.8207	-0.302488	CS0
26.83	-0.302501	CS0
26.8383	-0.302514	CS0
26.8466	-0.30253	CS0
26.8555	-0.302545	CS0
26.8631	-0.302575	CS0
26.8721	-0.302606	CS0
26.8801	-0.302644	CS0
26.8882	-0.302679	CS0
26.8957	-0.302718	CS0
26.9052	-0.302764	CS0
26.9128	-0.302821	CS0
26.9204	-0.302867	CS0
26.9293	-0.302906	CS0
26.9383	-0.302949	CS0
26.9468	-0.302994	CS0
26.9542	-0.303023	CS0
26.9621	-0.303053	CS0
26.9715	-0.303084	CS0
26.9803	-0.303099	CS0
26.9879	-0.303119	CS0
26.996	-0.303137	CS0
27.004	-0.303149	CS0
27.0121	-0.303158	CS0
27.0194	-0.303166	CS0
27.028	-0.30318	CS0
27.0373	-0.303206	CS0
27.0456	-0.30323	CS0
27.0532	-0.303259	CS0
27.0624	-0.30329	CS0
27.0703	-0.303322	CS0
27.0788	-0.303373	CS0
27.0874	-0.30343	CS0
27.0957	-0.30349	CS0
27.1034	-0.303528	CS0
27.1117	-0.30355	CS0
27.12	-0.303566	CS0
27.1283	-0.303583	CS0
27.1365	-0.303598	CS0
27.1445	-0.303604	CS0
27.1534	-0.303608	CS0
27.1613	-0.303614	CS0
27.1694	-0.30362	CS0
27.1775	-0.303634	CS0
27.1865	-0.30366	CS0
27.1944	-0.3037	CS0
27.2032	-0.303751	CS0
27.2113	-0.303789	CS0
27.2199	-0.303824	CS0
27.2273	-0.303861	CS0
27.2356	-0.303886	CS0
27.2435	-0.303906	CS0
27.2516	-0.303928	CS0
27.2608	-0.303939	CS0
27.2699	-0.303951	CS0
27.2776	-0.303963	CS0
27.2852	-0.303971	CS0
27.2943	-0.303981	CS0
27.3028	-0.303992	CS0
27.3112	-0.304008	CS0
27.3192	-0.304026	CS0
27.3267	-0.304047	CS0
27.3348	-0.304074	CS0
27.3434	-0.304111	CS0
27.3504	-0.304142	CS0
27.3603	-0.304175	CS0
27.3682	-0.304204	CS0
27.3762	-0.304215	CS0
27.3845	-0.304222	CS0
27.3934	-0.304238	CS0
27.4008	-0.304256	CS0
27.4089	-0.304273	CS0
27.4175	-0.304292	CS0
27.4259	-0.304321	CS0
27.4348	-0.304348	CS0
27.4434	-0.304371	CS0
27.4517	-0.304395	CS0
27.4599	-0.304408	CS0
27.4691	-0.304415	CS0
27.4756	-0.304439	CS0
27.4843	-0.304445	CS0
27.4938	-0.304451	CS0
27.5014	-0.304465	CS0
27.5093	-0.304489	CS0
27.5174	-0.304534	CS0
27.5255	-0.304587	CS0
27.5336	-0.304638	CS0
27.5418	-0.304688	CS0
27.551	-0.304741	CS0
27.5598	-0.304779	CS0
27.5681	-0.304796	CS0
27.575	-0.304807	CS0
27.5832	-0.304826	CS0
27.5922	-0.304831	CS0
27.5996	-0.304837	CS0
27.609	-0.304844	CS0
27.6171	-0.304854	CS0
27.6246	-0.304864	CS0
27.633	-0.304872	CS0
27.6413	-0.304884	CS0
27.6505	-0.304898	CS0
27.6575	-0.304921	CS0
27.6661	-0.304944	CS0
27.6745	-0.304958	CS0
27.6835	-0.304971	CS0
27.6918	-0.304978	CS0
27.7	-0.304984	CS0
27.7079	-0.30499	CS0
27.7163	-0.304998	CS0
27.724	-0.305008	CS0
27.7327	-0.305021	CS0
27.7415	-0.305043	CS0
27.7487	-0.305074	CS0
27.756	-0.305131	CS0
27.7659	-0.305189	CS0
27.7733	-0.30524	CS0
27.7827	-0.305266	CS0
27.7905	-0.30528	CS0
27.7983	-0.305286	CS0
27.8075	-0.305293	CS0
27.8152	-0.305307	CS0
27.8242	-0.305317	CS0
27.8328	-0.305323	CS0
27.8399	-0.305331	CS0
27.8491	-0.305338	CS0
27.857	-0.305344	CS0
27.8646	-0.305358	CS0
27.8739	-0.305379	CS0
27.8811	-0.305394	CS0
27.8893	-0.305418	CS0
27.8983	-0.305449	CS0
27.9066	-0.305472	CS0
27.9149	-0.305488	CS0
27.9227	-0.305495	CS0
27.9317	-0.305501	CS0
27.9402	-0.30551	CS0
27.9478	-0.305519	CS0
27.9559	-0.305538	CS0
27.9646	-0.305553	CS0
27.972	-0.305567	CS0
27.9808	-0.30558	CS0
27.9897	-0.305605	CS0
27.9979	-0.305617	CS0
28.0062	-0.305628	CS0
28.0155	-0.305636	CS0
28.0239	-0.305643	CS0
28.0307	-0.305651	CS0
28.0401	-0.305658	CS0
28.0484	-0.305667	CS0
28.0567	-0.305679	CS0
28.0655	-0.305711	CS0
28.0725	-0.305754	CS0
28.0804	-0.3058	CS0
28.0894	-0.305832	CS0
28.0978	-0.305864	CS0
28.1059	-0.305893	CS0
28.1144	-0.30591	CS0
28.1222	-0.305931	CS0
28.131	-0.305937	CS0
28.1392	-0.305942	CS0
28.1474	-0.305947	CS0
28.156	-0.305953	CS0
28.1643	-0.305962	CS0
28.1739	-0.305968	CS0
28.1826	-0.305975	CS0
28.1891	-0.305982	CS0
28.1985	-0.305989	CS0
28.2058	-0.305996	CS0
28.2141	-0.306004	CS0
28.222	-0.306011	CS0
28.2312	-0.306017	CS0
28.2389	-0.306024	CS0
28.2479	-0.306032	CS0
28.256	-0.306041	CS0
28.2645	-0.306056	CS0
28.2731	-0.306087	CS0
28.2813	-0.306121	CS0
28.29	-0.30616	CS0
28.2985	-0.30619	CS0
28.3068	-0.306208	CS0
28.315	-0.306224	CS0
28.3238	-0.30625	CS0
28.3311	-0.306268	CS0
28.3401	-0.306279	CS0
28.3471	-0.306289	CS0
28.3557	-0.3063	CS0
28.3638	-0.306308	CS0
28.3717	-0.306318	CS0
28.3805	-0.306324	CS0
28.389	-0.306332	CS0
28.3976	-0.306338	CS0
28.4056	-0.306345	CS0
28.4148	-0.306361	CS0
28.422	-0.306394	CS0
28.4307	-0.306434	CS0
28.4381	-0.306454	CS0
28.4463	-0.30647	CS0
28.4556	-0.306483	CS0
28.4632	-0.306501	CS0
28.4713	-0.306523	CS0
28.4797	-0.30654	CS0
28.4887	-0.30655	CS0
28.4967	-0.306558	CS0
28.5053	-0.306568	CS0
28.514	-0.306577	CS0
28.5217	-0.306587	CS0
28.529	-0.306596	CS0
28.5387	-0.306604	CS0
28.5466	-0.306612	CS0
28.5548	-0.30662	CS0
28.5637	-0.306629	CS0
28.5721	-0.306637	CS0
28.5797	-0.306649	CS0
28.5874	-0.30666	CS0
28.5973	-0.306667	CS0
28.6052	-0.306676	CS0
28.6131	-0.306683	CS0
28.6217	-0.306691	CS0
28.6296	-0.306699	CS0
28.6381	-0.306709	CS0
28.6463	-0.306718	CS0
28.6543	-0.306726	CS0
28.663	-0.306734	CS0
28.6709	-0.306743	CS0
28.68	-0.306751	CS0
28.6881	-0.306761	CS0
28.6958	-0.30677	CS0
28.7056	-0.306783	CS0
28.7133	-0.306794	CS0
28.721	-0.306807	CS0
28.7304	-0.306825	CS0
28.7382	-0.306834	CS0
28.7471	-0.306843	CS0
28.754	-0.306853	CS0
28.7621	-0.306862	CS0
28.7712	-0.30687	CS0
28.7792	-0.306878	CS0
28.7885	-0.306886	CS0
28.7958	-0.306894	CS0
28.8042	-0.306903	CS0
28.8134	-0.306911	CS0
28.8216	-0.30692	CS0
28.8298	-0.306928	CS0
28.8366	-0.306937	CS0
28.8461	-0.306951	CS0
28.8554	-0.306961	CS0
28.8629	-0.30697	CS0
28.8716	-0.306978	CS0
28.8802	-0.306986	CS0
28.8882	-0.306994	CS0
28.8956	-0.307003	CS0
28.9048	-0.307011	CS0
28.9133	-0.307019	CS0
28.9214	-0.307027	CS0
28.9294	-0.307035	CS0
28.9388	-0.307044	CS0
28.9457	-0.307053	CS0
28.9545	-0.307061	CS0
28.9625	-0.307069	CS0
28.9705	-0.307075	CS0
28.9797	-0.307082	CS0
28.9869	-0.30709	CS0
28.9962	-0.307098	CS0
29.0045	-0.307106	CS0
29.0123	-0.307113	CS0
29.021	-0.307121	CS0
29.0301	-0.30713	CS0
29.0365	-0.30714	CS0
29.046	-0.307149	CS0
29.0537	-0.30716	CS0
29.0624	-0.307173	CS0
29.0706	-0.307182	CS0
29.0797	-0.30719	CS0
29.087	-0.307199	CS0
29.0958	-0.307208	CS0
29.1045	-0.307218	CS0
29.1122	-0.307228	CS0
29.1207	-0.307238	CS0
29.1292	-0.307257	CS0
29.1384	-0.30727	CS0
29.145	-0.307291	CS0
29.1544	-0.307313	CS0
29.1626	-0.307347	CS0
29.1713	-0.30737	CS0
29.1798	-0.307384	CS0
29.1882	-0.307394	CS0
29.1956	-0.307403	CS0
29.2043	-0.307411	CS0
29.2124	-0.307418	CS0
29.2206	-0.307425	CS0
29.2297	-0.307432	CS0
29.2368	-0.307439	CS0
29.2461	-0.307445	CS0
29.2551	-0.307452	CS0
29.2626	-0.30746	CS0
29.2711	-0.307468	CS0
29.2794	-0.307477	CS0
29.2875	-0.307485	CS0
29.2951	-0.307493	CS0
29.3044	-0.307505	CS0
29.3119	-0.307526	CS0
29.3202	-0.307566	CS0
29.3293	-0.307586	CS0
29.3384	-0.307595	CS0
29.346	-0.307604	CS0
29.3546	-0.307613	CS0
29.3629	-0.307622	CS0
29.3707	-0.307631	CS0
29.3787	-0.307639	CS0
29.3866	-0.307647	CS0
29.3958	-0.307655	CS0
29.4037	-0.307663	CS0
29.4125	-0.307673	CS0
29.421	-0.307681	CS0
29.4285	-0.30769	CS0
29.4377	-0.307698	CS0
29.4455	-0.307707	CS0
29.4542	-0.307716	CS0
29.462	-0.307725	CS0
29.4716	-0.307734	CS0
29.4791	-0.307742	CS0
29.4875	-0.30775	CS0
29.4951	-0.307758	CS0
29.5038	-0.307767	CS0
29.5126	-0.307774	CS0
29.5213	-0.307783	CS0
29.5299	-0.307792	CS0
29.5373	-0.307808	CS0
29.5462	-0.307818	CS0
29.5544	-0.307829	CS0
29.5622	-0.307838	CS0
29.5708	-0.307848	CS0
29.5783	-0.307857	CS0
29.5872	-0.307865	CS0
29.5952	-0.307874	CS0
29.6039	-0.307881	CS0
29.6129	-0.307888	CS0
29.6199	-0.307898	CS0
29.6298	-0.307909	CS0
29.6385	-0.307921	CS0
29.6464	-0.307937	CS0
29.6543	-0.307951	CS0
29.6622	-0.30796	CS0
29.6708	-0.30797	CS0
29.6789	-0.307979	CS0
29.6883	-0.307987	CS0
29.6957	-0.307995	CS0
29.7042	-0.308003	CS0
29.7129	-0.30801	CS0
29.7224	-0.308016	CS0
29.73	-0.308023	CS0
29.7364	-0.308029	CS0
29.7464	-0.308037	CS0
29.7543	-0.308045	CS0
29.7631	-0.308053	CS0
29.7705	-0.30806	CS0
29.7787	-0.308067	CS0
29.7864	-0.308074	CS0
29.7956	-0.308082	CS0
29.8044	-0.308091	CS0
29.8122	-0.308098	CS0
29.8205	-0.308106	CS0
29.8285	-0.308115	CS0
29.8379	-0.308123	CS0
29.8461	-0.308134	CS0
29.8549	-0.308144	CS0
29.8635	-0.308158	CS0
29.871	-0.308174	CS0
29.8799	-0.308185	CS0
29.8879	-0.308195	CS0
29.8952	-0.308203	CS0
29.9028	-0.308211	CS0
29.9123	-0.308218	CS0
29.9196	-0.308226	CS0
29.9285	-0.308234	CS0
29.9369	-0.308243	CS0
29.9451	-0.308252	CS0
29.9547	-0.308261	CS0
29.9621	-0.308271	CS0
29.9706	-0.308281	CS0
29.9784	-0.30829	CS0
29.9872	-0.308298	CS0
29.9953	-0.308305	CS0
30.0044	-0.308311	CS0
30.0119	-0.308318	CS0
30.0198	-0.308324	CS0
30.0291	-0.30833	CS0
30.0383	-0.308337	CS0
30.0454	-0.308344	CS0
30.0531	-0.308353	CS0
30.0615	-0.308361	CS0
30.0705	-0.30837	CS0
30.0786	-0.308377	CS0
30.0874	-0.308385	CS0
30.0952	-0.308394	CS0
30.1038	-0.308403	CS0
30.112	-0.308413	CS0
30.1201	-0.308426	CS0
30.1286	-0.308437	CS0
30.1373	-0.30845	CS0
30.1453	-0.308459	CS0
30.1525	-0.308468	CS0
30.161	-0.308477	CS0
30.1698	-0.308485	CS0
30.1793	-0.308492	CS0
30.1865	-0.308499	CS0
30.1956	-0.308504	CS0
30.2035	-0.308509	CS0
30.212	-0.308514	CS0
30.2201	-0.30852	CS0
30.2284	-0.308526	CS0
30.2377	-0.308533	CS0
30.2451	-0.308541	CS0
30.2538	-0.30855	CS0
30.2615	-0.30856	CS0
30.27	-0.30857	CS0
30.2782	-0.308579	CS0
30.2874	-0.308587	CS0
30.2948	-0.308594	CS0
30.3037	-0.3086	CS0
30.3118	-0.308607	CS0
30.3206	-0.308613	CS0
30.3275	-0.308619	CS0
30.3373	-0.308625	CS0
30.3448	-0.308631	CS0
30.3538	-0.308636	CS0
30.3621	-0.308642	CS0
30.3701	-0.308649	CS0
30.3778	-0.308656	CS0
30.3876	-0.308663	CS0
30.3951	-0.30867	CS0
30.4034	-0.308678	CS0
30.412	-0.308686	CS0
30.4212	-0.308694	CS0
30.4282	-0.308701	CS0
30.4367	-0.308707	CS0
30.4448	-0.308714	CS0
30.4539	-0.30872	CS0
30.4622	-0.308726	CS0
30.47	-0.308733	CS0
30.4785	-0.30874	CS0
30.4872	-0.308747	CS0
30.495	-0.308755	CS0
30.5028	-0.308762	CS0
30.5118	-0.30877	CS0
30.5188	-0.308777	CS0
30.5273	-0.308785	CS0
30.5359	-0.308792	CS0
30.5447	-0.308799	CS0
30.5531	-0.308807	CS0
30.5608	-0.308814	CS0
30.5708	-0.308821	CS0
30.5777	-0.308827	CS0
30.5876	-0.308833	CS0
30.5954	-0.308839	CS0
30.6031	-0.308844	CS0
30.6118	-0.308848	CS0
30.6207	-0.308852	CS0
30.6286	-0.308856	CS0
30.637	-0.308859	CS0
30.6451	-0.308865	CS0
30.6539	-0.30887	CS0
30.6612	-0.308876	CS0
30.669	-0.30888	CS0
30.6793	-0.308885	CS0
30.6873	-0.30889	CS0
30.6957	-0.308895	CS0
30.7041	-0.3089	CS0
30.7116	-0.308905	CS0
30.7202	-0.30891	CS0
30.7283	-0.308917	CS0
30.7361	-0.308936	CS0
30.7457	-0.308967	CS0
30.7531	-0.30899	CS0
30.7612	-0.309006	CS0
30.7695	-0.309014	CS0
30.7781	-0.30902	CS0
30.7861	-0.309025	CS0
30.7953	-0.309029	CS0
30.8031	-0.309033	CS0
30.8118	-0.309036	CS0
30.8206	-0.30904	CS0
30.8286	-0.309044	CS0
30.8367	-0.309048	CS0
30.8462	-0.309052	CS0
30.8539	-0.309058	CS0
30.8617	-0.309065	CS0
30.8706	-0.309072	CS0
30.8787	-0.309079	CS0
30.8876	-0.309092	CS0
30.8953	-0.309102	CS0
30.9036	-0.309109	CS0
30.9118	-0.309116	CS0
30.9205	-0.309122	CS0
30.929	-0.309127	CS0
30.9374	-0.309132	CS0
30.9454	-0.309137	CS0
30.9536	-0.309141	CS0
30.9618	-0.309147	CS0
30.9707	-0.309152	CS0
30.9783	-0.309158	CS0
30.9869	-0.309164	CS0
30.9949	-0.30917	CS0
31.0038	-0.309175	CS0
31.0127	-0.309181	CS0
31.0202	-0.309185	CS0
31.0286	-0.309189	CS0
31.0369	-0.309193	CS0
31.045	-0.309198	CS0
31.0537	-0.309204	CS0
31.0622	-0.309209	CS0
31.0701	-0.309213	CS0
31.0779	-0.309217	CS0
31.0867	-0.309223	CS0
31.095	-0.309229	CS0
31.1021	-0.309235	CS0
31.1117	-0.30924	CS0
31.1196	-0.309247	CS0
31.1289	-0.309254	CS0
31.1364	-0.309264	CS0
31.1444	-0.309271	CS0
31.1529	-0.309277	CS0
31.1616	-0.309283	CS0
31.1701	-0.309289	CS0
31.1799	-0.309295	CS0
31.1868	-0.3093	CS0
31.1951	-0.309305	CS0
31.2039	-0.309309	CS0
31.2113	-0.309312	CS0
31.22	-0.309316	CS0
31.2283	-0.30932	CS0
31.237	-0.309323	CS0
31.2446	-0.309327	CS0
31.2527	-0.309331	CS0
31.2621	-0.309336	CS0
31.2703	-0.309344	CS0
31.2793	-0.309355	CS0
31.2869	-0.309361	CS0
31.2947	-0.309367	CS0
31.3032	-0.309373	CS0
31.3115	-0.309378	CS0
31.32	-0.309383	CS0
31.3286	-0.309387	CS0
31.3371	-0.30939	CS0
31.3452	-0.309394	CS0
31.3537	-0.309398	CS0
31.363	-0.309404	CS0
31.3717	-0.309409	CS0
31.3799	-0.309415	CS0
31.3885	-0.30942	CS0
31.3958	-0.309426	CS0
31.4043	-0.309431	CS0
31.4122	-0.309436	CS0
31.4213	-0.309441	CS0
31.4289	-0.309447	CS0
31.4375	-0.309452	CS0
31.4454	-0.309457	CS0
31.4534	-0.309463	CS0
31.4625	-0.309468	CS0
31.471	-0.309474	CS0
31.4788	-0.30948	CS0
31.4868	-0.309485	CS0
31.4958	-0.309491	CS0
31.5039	-0.309494	CS0
31.5118	-0.309498	CS0
31.5207	-0.309502	CS0
31.5287	-0.309506	CS0
31.5371	-0.309509	CS0
31.5458	-0.309513	CS0
31.5548	-0.309516	CS0
31.5622	-0.30952	CS0
31.5706	-0.309524	CS0
31.5796	-0.309528	CS0
31.5872	-0.309532	CS0
31.5964	-0.309536	CS0
31.6043	-0.30954	CS0
31.613	-0.309545	CS0
31.6207	-0.309549	CS0
31.6299	-0.309553	CS0
31.6378	-0.309558	CS0
31.6456	-0.309563	CS0
31.6544	-0.309568	CS0
31.6613	-0.309574	CS0
31.6708	-0.309579	CS0
31.6785	-0.309586	CS0
31.6872	-0.309592	CS0
31.6965	-0.309598	CS0
31.7043	-0.309603	CS0
31.7121	-0.309607	CS0
31.7214	-0.30961	CS0
31.7301	-0.309613	CS0
31.7375	-0.309616	CS0
31.747	-0.30962	CS0
31.7546	-0.309624	CS0
31.7621	-0.309628	CS0
31.7721	-0.309634	CS0
31.7788	-0.30964	CS0
31.787	-0.309646	CS0
31.7952	-0.309653	CS0
31.8037	-0.309659	CS0
31.8117	-0.309665	CS0
31.8202	-0.309671	CS0
31.8292	-0.309676	CS0
31.8379	-0.30968	CS0
31.8463	-0.309684	CS0
31.854	-0.309688	CS0
31.8627	-0.309692	CS0
31.8713	-0.309697	CS0
31.8796	-0.309701	CS0
31.8876	-0.309705	CS0
31.8956	-0.309709	CS0
31.9041	-0.309713	CS0
31.9124	-0.309717	CS0
31.9207	-0.309722	CS0
31.9288	-0.309727	CS0
31.9372	-0.309733	CS0
31.9461	-0.309738	CS0
31.9547	-0.309743	CS0
31.9624	-0.309748	CS0
31.9708	-0.309754	CS0
31.9797	-0.309759	CS0
31.9877	-0.309764	CS0
31.9959	-0.309768	CS0
32.0043	-0.309773	CS0
32.0132	-0.309778	CS0
32.0209	-0.309783	CS0
32.0293	-0.30979	CS0
32.0373	-0.309797	CS0
32.0457	-0.309803	CS0
32.0547	-0.309809	CS0
32.0631	-0.309814	CS0
32.0709	-0.309817	CS0
32.08	-0.309819	CS0
32.0883	-0.30982	CS0
32.0962	-0.309822	CS0
32.1041	-0.309824	CS0
32.1124	-0.309827	CS0
32.1212	-0.309831	CS0
32.1283	-0.309835	CS0
32.1378	-0.309841	CS0
32.1456	-0.309846	CS0
32.1532	-0.309851	CS0
32.1623	-0.309855	CS0
32.1705	-0.309859	CS0
32.1791	-0.309862	CS0
32.1882	-0.309865	CS0
32.1963	-0.309868	CS0
32.2046	-0.309871	CS0
32.2123	-0.309874	CS0
32.2209	-0.309878	CS0
32.2293	-0.309882	CS0
32.2365	-0.309885	CS0
32.2451	-0.309887	CS0
32.2545	-0.309889	CS0
32.2621	-0.309892	CS0
32.2717	-0.309896	CS0
32.2788	-0.3099	CS0
32.2875	-0.309904	CS0
32.2959	-0.309907	CS0
32.3043	-0.309911	CS0
32.3137	-0.309917	CS0
32.3206	-0.309921	CS0
32.3295	-0.309927	CS0
32.338	-0.309931	CS0
32.3457	-0.309934	CS0
32.3546	-0.309937	CS0
32.3628	-0.30994	CS0
32.3712	-0.309943	CS0
32.3785	-0.309945	CS0
32.3871	-0.309949	CS0
32.3955	-0.309953	CS0
32.4039	-0.309957	CS0
32.4107	-0.309961	CS0
32.4204	-0.309966	CS0
32.4294	-0.30997	CS0
32.4374	-0.309973	CS0
32.4457	-0.309977	CS0
32.454	-0.30998	CS0
32.4631	-0.309982	CS0
32.4714	-0.309983	CS0
32.4796	-0.309985	CS0
32.4887	-0.309988	CS0
32.497	-0.309991	CS0
32.5047	-0.309994	CS0
32.5124	-0.309997	CS0
32.5212	-0.31	CS0
32.5291	-0.310003	CS0
32.5381	-0.310007	CS0
32.5466	-0.31001	CS0
32.5551	-0.310014	CS0
32.5634	-0.310019	CS0
32.5724	-0.310024	CS0
32.5796	-0.310028	CS0
32.587	-0.310032	CS0
32.596	-0.310036	CS0
32.6044	-0.31004	CS0
32.6126	-0.310045	CS0
32.6212	-0.310049	CS0
32.6302	-0.310053	CS0
32.6368	-0.310056	CS0
32.6455	-0.310059	CS0
32.6541	-0.310062	CS0
32.6627	-0.310065	CS0
32.6711	-0.310068	CS0
32.6796	-0.31007	CS0
32.6879	-0.310072	CS0
32.6963	-0.310073	CS0
32.7043	-0.310076	CS0
32.713	-0.310081	CS0
32.7227	-0.310085	CS0
32.7302	-0.31009	CS0
32.739	-0.310094	CS0
32.747	-0.310098	CS0
32.7552	-0.310103	CS0
32.7633	-0.310107	CS0
32.7712	-0.31011	CS0
32.7799	-0.310112	CS0
32.7883	-0.310113	CS0
32.7972	-0.310115	CS0
32.8053	-0.310117	CS0
32.813	-0.310119	CS0
32.8221	-0.310122	CS0
32.8299	-0.310124	CS0
32.8384	-0.310127	CS0
32.8462	-0.310131	CS0
32.8559	-0.310135	CS0
32.8628	-0.310139	CS0
32.8723	-0.310143	CS0
32.8806	-0.310147	CS0
32.8888	-0.310152	CS0
32.8973	-0.310157	CS0
32.9048	-0.310162	CS0
32.9133	-0.310165	CS0
32.9228	-0.310169	CS0
32.9301	-0.310173	CS0
32.9385	-0.310177	CS0
32.9469	-0.310181	CS0
32.9553	-0.310184	CS0
32.9636	-0.310187	CS0
32.9722	-0.31019	CS0
32.9805	-0.310193	CS0
32.989	-0.310196	CS0
32.9982	-0.310198	CS0
33.0066	-0.3102	CS0
33.0144	-0.310203	CS0
33.0213	-0.310206	CS0
33.0294	-0.310209	CS0
33.039	-0.310212	CS0
33.0466	-0.310215	CS0
33.0548	-0.310219	CS0
33.0631	-0.310223	CS0
33.0722	-0.310226	CS0
33.081	-0.31023	CS0
33.0894	-0.310234	CS0
33.0972	-0.310237	CS0
33.1054	-0.310242	CS0
33.1141	-0.310246	CS0
33.1216	-0.31025	CS0
33.1303	-0.310254	CS0
33.1388	-0.310259	CS0
33.1458	-0.310264	CS0
33.1547	-0.310268	CS0
33.1632	-0.310272	CS0
33.1717	-0.310277	CS0
33.1803	-0.310284	CS0
33.1887	-0.310289	CS0
33.1971	-0.310293	CS0
33.2057	-0.310296	CS0
33.2136	-0.310299	CS0
33.2222	-0.310303	CS0
33.2308	-0.310307	CS0
33.2388	-0.310311	CS0
33.2475	-0.310313	CS0
33.2572	-0.310316	CS0
33.2646	-0.310319	CS0
33.272	-0.310324	CS0
33.2808	-0.310329	CS0
33.2882	-0.310338	CS0
33.2977	-0.310343	CS0
33.3046	-0.310347	CS0
33.3131	-0.310351	CS0
33.3213	-0.310354	CS0
33.3297	-0.310356	CS0
33.3378	-0.310358	CS0
33.3461	-0.31036	CS0
33.3554	-0.310362	CS0
33.3632	-0.310365	CS0
33.3722	-0.31037	CS0
33.3808	-0.310379	CS0
33.3886	-0.310392	CS0
33.3974	-0.310398	CS0
33.4045	-0.310403	CS0
33.413	-0.310407	CS0
33.4209	-0.310409	CS0
33.4298	-0.31041	CS0
33.4392	-0.310411	CS0
33.4472	-0.310412	CS0
33.4556	-0.310412	CS0
33.4637	-0.310414	CS0
33.4734	-0.310416	CS0
33.4809	-0.310421	CS0
33.4888	-0.310425	CS0
33.4968	-0.31043	CS0
33.5049	-0.310434	CS0
33.5123	-0.310438	CS0
33.5225	-0.310441	CS0
33.5302	-0.310445	CS0
33.5386	-0.310447	CS0
33.5469	-0.310449	CS0
33.5558	-0.310451	CS0
33.5638	-0.310454	CS0
33.5715	-0.310457	CS0
33.5808	-0.31046	CS0
33.589	-0.310462	CS0
33.5967	-0.310464	CS0
33.6045	-0.310466	CS0
33.6133	-0.310467	CS0
33.622	-0.310469	CS0
33.6311	-0.310471	CS0
33.6383	-0.310474	CS0
33.6467	-0.310477	CS0
33.6553	-0.310481	CS0
33.6635	-0.310486	CS0
33.6724	-0.31049	CS0
33.6801	-0.310495	CS0
33.6889	-0.3105	CS0
33.6976	-0.310504	CS0
33.7064	-0.310507	CS0
33.7142	-0.31051	CS0
33.7219	-0.310512	CS0
33.7298	-0.310515	CS0
33.7393	-0.310518	CS0
33.7473	-0.310521	CS0
33.7555	-0.310523	CS0
33.7637	-0.310526	CS0
33.7725	-0.310529	CS0
33.7809	-0.310532	CS0
33.7898	-0.310535	CS0
33.7974	-0.310538	CS0
33.8064	-0.310543	CS0
33.814	-0.310548	CS0
33.8232	-0.310554	CS0
33.831	-0.310558	CS0
33.8389	-0.310561	CS0
33.8473	-0.310563	CS0
33.8551	-0.310565	CS0
33.8639	-0.310567	CS0
33.8715	-0.310568	CS0
33.8805	-0.310569	CS0
33.8886	-0.31057	CS0
33.8969	-0.310571	CS0
33.9063	-0.310573	CS0
33.9142	-0.310577	CS0
33.9228	-0.31058	CS0
33.9304	-0.310583	CS0
33.9388	-0.310587	CS0
33.9477	-0.31059	CS0
33.9552	-0.310593	CS0
33.9644	-0.310595	CS0
33.9728	-0.310598	CS0
33.98	-0.3106	CS0
33.9894	-0.310601	CS0
33.9974	-0.310603	CS0
34.0058	-0.310606	CS0
34.0143	-0.310609	CS0
34.0225	-0.310613	CS0
34.0307	-0.310618	CS0
34.0396	-0.310622	CS0
34.0481	-0.310626	CS0
34.0557	-0.310629	CS0
34.0644	-0.310631	CS0
34.0726	-0.310632	CS0
34.0807	-0.310633	CS0
34.0885	-0.310633	CS0
34.0968	-0.310634	CS0
34.1062	-0.310635	CS0
34.1137	-0.310638	CS0
34.1216	-0.310642	CS0
34.1313	-0.310649	CS0
34.1388	-0.310657	CS0
34.1473	-0.310666	CS0
34.1561	-0.310673	CS0
34.164	-0.31068	CS0
34.173	-0.310685	CS0
34.1808	-0.310689	CS0
34.1899	-0.310691	CS0
34.1979	-0.310692	CS0
34.2067	-0.310694	CS0
34.2149	-0.310696	CS0
34.2216	-0.310698	CS0
34.2311	-0.310701	CS0
34.2391	-0.310704	CS0
34.2471	-0.310708	CS0
34.2554	-0.310711	CS0
34.2639	-0.310715	CS0
34.2716	-0.310719	CS0
34.2804	-0.310722	CS0
34.2898	-0.310725	CS0
34.2962	-0.310727	CS0
34.306	-0.310729	CS0
34.314	-0.31073	CS0
34.3215	-0.310732	CS0
34.3309	-0.310735	CS0
34.3389	-0.310738	CS0
34.347	-0.310742	CS0
34.3558	-0.310744	CS0
34.3647	-0.310747	CS0
34.3727	-0.310751	CS0
34.3807	-0.310754	CS0
34.3893	-0.310757	CS0
34.3976	-0.31076	CS0
34.4056	-0.310762	CS0
34.4132	-0.310763	CS0
34.4224	-0.310766	CS0
34.4308	-0.310771	CS0
34.4397	-0.310775	CS0
34.4466	-0.31078	CS0
34.4564	-0.310784	CS0
34.4647	-0.310788	CS0
34.4726	-0.310791	CS0
34.4816	-0.310794	CS0
34.4901	-0.310797	CS0
34.4978	-0.310798	CS0
34.5059	-0.310799	CS0
34.5142	-0.310801	CS0
34.5225	-0.310801	CS0
34.5308	-0.310803	CS0
34.5394	-0.310804	CS0
34.5478	-0.310806	CS0
34.5565	-0.310808	CS0
34.5637	-0.31081	CS0
34.5724	-0.310812	CS0
34.5809	-0.310814	CS0
34.5893	-0.310818	CS0
34.5976	-0.310822	CS0
34.606	-0.310826	CS0
34.6154	-0.310829	CS0
34.6235	-0.310833	CS0
34.6316	-0.310837	CS0
34.6397	-0.31084	CS0
34.6475	-0.310842	CS0
34.6554	-0.310844	CS0
34.6644	-0.310846	CS0
34.6728	-0.310847	CS0
34.6811	-0.310849	CS0
34.6896	-0.310851	CS0
34.6973	-0.310853	CS0
34.7062	-0.310856	CS0
34.7149	-0.310859	CS0
34.7232	-0.310862	CS0
34.7317	-0.310865	CS0
34.7394	-0.310867	CS0
34.7485	-0.310868	CS0
34.7567	-0.31087	CS0
34.7652	-0.310871	CS0
34.7731	-0.310873	CS0
34.7812	-0.310875	CS0
34.7904	-0.310877	CS0
34.7979	-0.310879	CS0
34.8062	-0.310882	CS0
34.8149	-0.310885	CS0
34.8223	-0.310888	CS0
34.8309	-0.310891	CS0
34.8401	-0.310893	CS0
34.8476	-0.310895	CS0
34.8567	-0.310897	CS0
34.865	-0.310899	CS0
34.8733	-0.310902	CS0
34.8821	-0.310904	CS0
34.8895	-0.310906	CS0
34.8979	-0.310908	CS0
34.906	-0.310912	CS0
34.9141	-0.310916	CS0
34.9235	-0.31092	CS0
34.9314	-0.310923	CS0
34.9398	-0.310926	CS0
34.9477	-0.310929	CS0
34.957	-0.310931	CS0
34.9646	-0.310934	CS0
34.9728	-0.310936	CS0
34.9812	-0.310938	CS0
34.9898	-0.31094	CS0
34.9981	-0.310943	CS0
35.0066	-0.310947	CS0
35.0145	-0.310951	CS0
35.0232	-0.310957	CS0
35.0317	-0.310962	CS0
35.0402	-0.310966	CS0
35.049	-0.31097	CS0
35.0569	-0.310973	CS0
35.0646	-0.310975	CS0
35.0734	-0.310977	CS0
35.0816	-0.310978	CS0
35.0894	-0.310978	CS0
35.0981	-0.310979	CS0
35.1057	-0.31098	CS0
35.1145	-0.310981	CS0
35.1228	-0.310983	CS0
35.1319	-0.310985	CS0
35.1394	-0.310986	CS0
35.1486	-0.310988	CS0
35.1561	-0.31099	CS0
35.1649	-0.310992	CS0
35.1738	-0.310994	CS0
35.1821	-0.310996	CS0
35.1896	-0.310999	CS0
35.1974	-0.311001	CS0
35.2073	-0.311003	CS0
35.2144	-0.311006	CS0
35.2231	-0.311008	CS0
35.2309	-0.31101	CS0
35.2399	-0.311013	CS0
35.2479	-0.311016	CS0
35.2567	-0.311018	CS0
35.265	-0.311021	CS0
35.2723	-0.311025	CS0
35.2826	-0.311028	CS0
35.2901	-0.311031	CS0
35.2992	-0.311035	CS0
35.3065	-0.311039	CS0
35.3153	-0.311041	CS0
35.3231	-0.311043	CS0
35.3324	-0.311045	CS0
35.3389	-0.311046	CS0
35.3473	-0.311048	CS0
[truncated: 22,002 more rows]

## Sheet: Sucrose_points
Temperature	adjusted_heatflow
32.5551	-0.322762
40.3221	-0.323409
32.8188	-0.328648
40.6293	-0.329208
32.7522	-0.334593
40.7533	-0.335162
33.5836	-0.340767
41.8683	-0.340996
35.2701	-0.346213
43.5962	-0.346847

## Sheet: Trehalose_12_Enthalpy
Sample	Trial	Tm	Enthalpy	Avg_Tm	Stdev_Tm	Avg_Enthalpy	Stdev_Enthalpy	C_Enthalpy	Avg_C_Enthalpy	Stdev_C_Enthalpy		Ttest tm	Ttest_Enthalpy
CT0	1	35.5918	0.030732	35.3892	0.564925	0.0264377	0.00423768
CT0	2	35.8249	0.026322
CT0	3	34.7509	0.022259
CT1	1	35.7965	0.033355	35.7703	0.166995	0.031919	0.00154692	-0.002623	0.00548133	0.00271348		0.36394	0.142951
CT1	2	35.9227	0.032121					-0.005799
CT1	3	35.5918	0.030281					-0.008022
CT10	1	35.6794	0.036461	35.943	0.275211	0.035725	0.00068614	-0.005729	0.00928733	0.0035575		0.227451	0.0594853
CT10	2	36.2285	0.035611					-0.009289
CT10	3	35.921	0.035103					-0.012844
CT100	1	36.7187	0.04862	36.6905	0.137573	0.049031	0.0040422	-0.017888	0.0225933	0.00453709		0.0504822	0.00262867
CT100	2	36.8118	0.053263					-0.026941
CT100	3	36.541	0.04521					-0.022951
CT500	1	41.5981	0.087003	41.663	0.0562818	0.091236	0.00374252	-0.056271	0.0647983	0.00749465		0.00248158	4.2642e-05
CT500	2	41.6988	0.094106					-0.067784
CT500	3	41.6919	0.092599					-0.07034

## Sheet: Sucrose_12_Enthalpy
Sample	Trial	Tm	Enthalpy	Avg_Tm	Stdev_Tm	Avg_Enthalpy	Stdev_Enthalpy	C_Enthalpy	Avg_C_Enthalpy	Stdev_C_Enthalpy		Ttest tm	Ttest_Enthalpy
CS0	1	36.7249	0.043134	36.7337	0.0225486	0.055357	0.0132603
CS0	2	36.7168	0.069455
CS0	3	36.7593	0.053482
CS1	1	36.9716	0.042744	36.9885	0.133972	0.056655	0.015022	0.00039	0.001298	0.00176385		0.0772478	0.916149
CS1	2	37.1301	0.072584					-0.003129
CS1	3	36.8637	0.054637					-0.001155
CS10	1	37.2483	0.041864	36.6066	0.787437	0.0563823	0.016934	0.00127	0.00102533	0.00390139		0.806184	0.938376
CS10	2	36.8437	0.074985					-0.00553
CS10	3	35.7279	0.052298					0.001184
CS100	1	37.5545	0.051375	36.858	0.975294	0.05748	0.00720142	-0.008241	0.002123	0.00613709		0.845763	0.822782
CS100	2	37.2762	0.065422					0.004033
CS100	3	35.7433	0.055643					-0.002161
CS500	1	39.532	0.082635	39.3117	0.576269	0.0902317	0.00669961	-0.039501	0.0348747	0.00782415		0.0161343	0.0275501
CS500	2	39.7453	0.095296					-0.025841
CS500	3	38.6577	0.092764					-0.039282
