# Supplementary material for: Disordered proteins interact with the chemical environment to tune their protective function during drying
Source: eLife. 2024 Nov 19;13:RP97231. doi: 10.7554/eLife.97231 (PMC11575898; doi:10.7554/eLife.97231)
Supplement: Figure 5—source data 1. [file elife-97231-fig5-data1.xlsx]

## Sheet: CAHS D_Trehalose
Temperature	Heat Flow (Normalized)	Sample
20.0239	-0.0144576	CT0
20.0239	-0.0144576	CT0
20.0235	-0.0144576	CT0
20.0233	-0.0144579	CT0
20.0241	-0.0144583	CT0
20.024	-0.014459	CT0
20.0245	-0.0144598	CT0
20.0236	-0.0144603	CT0
20.0235	-0.0144607	CT0
20.0243	-0.0144608	CT0
20.0242	-0.0144608	CT0
20.0244	-0.0144604	CT0
20.0244	-0.0144604	CT0
20.0239	-0.0144609	CT0
20.0232	-0.0144616	CT0
20.0257	-0.0144625	CT0
20.0254	-0.0144632	CT0
20.0253	-0.0144637	CT0
20.0256	-0.0144643	CT0
20.0248	-0.0144641	CT0
20.025	-0.0144642	CT0
20.0246	-0.0144646	CT0
20.0263	-0.014465	CT0
20.0258	-0.0144655	CT0
20.0265	-0.0144658	CT0
20.027	-0.0144661	CT0
20.0272	-0.0144667	CT0
20.0277	-0.0144673	CT0
20.0279	-0.0144684	CT0
20.0279	-0.0144699	CT0
20.0283	-0.0144712	CT0
20.0283	-0.0144733	CT0
20.0286	-0.0144751	CT0
20.029	-0.0144772	CT0
20.0304	-0.0144799	CT0
20.0302	-0.0144855	CT0
20.0307	-0.0144988	CT0
20.0315	-0.0145155	CT0
20.032	-0.0145378	CT0
20.0323	-0.0145682	CT0
20.0337	-0.0146027	CT0
20.0345	-0.0146499	CT0
20.0354	-0.0147254	CT0
20.0357	-0.0148117	CT0
20.037	-0.0149201	CT0
20.0383	-0.0150408	CT0
20.0393	-0.0152174	CT0
20.0401	-0.0154695	CT0
20.041	-0.0157879	CT0
20.0424	-0.0161604	CT0
20.0429	-0.016573	CT0
20.0451	-0.0170225	CT0
20.0452	-0.0175296	CT0
20.0478	-0.0180133	CT0
20.0484	-0.0185297	CT0
20.0483	-0.0190084	CT0
20.0504	-0.0193784	CT0
20.053	-0.0198888	CT0
20.0542	-0.0203018	CT0
20.0558	-0.0207293	CT0
20.0569	-0.0211764	CT0
20.0588	-0.0217073	CT0
20.0607	-0.0222077	CT0
20.0617	-0.022788	CT0
20.0637	-0.0234433	CT0
20.0662	-0.0241107	CT0
20.0677	-0.0247486	CT0
20.0693	-0.02547	CT0
20.0707	-0.0262378	CT0
20.0734	-0.0269978	CT0
20.0764	-0.0277961	CT0
20.0775	-0.0285295	CT0
20.0796	-0.0294062	CT0
20.0833	-0.0302118	CT0
20.085	-0.0310093	CT0
20.0873	-0.0318931	CT0
20.0895	-0.0328266	CT0
20.0921	-0.0337446	CT0
20.0937	-0.0347152	CT0
20.0964	-0.0357283	CT0
20.0991	-0.0366776	CT0
20.1027	-0.0377219	CT0
20.105	-0.0388356	CT0
20.1076	-0.0399269	CT0
20.1099	-0.0410542	CT0
20.1123	-0.0422415	CT0
20.1161	-0.0434353	CT0
20.1179	-0.0446621	CT0
20.1221	-0.0458342	CT0
20.1245	-0.0470654	CT0
20.1282	-0.0482906	CT0
20.1312	-0.0494513	CT0
20.1344	-0.0507114	CT0
20.1377	-0.0518615	CT0
20.1413	-0.0532633	CT0
20.1434	-0.0546555	CT0
20.1462	-0.0561012	CT0
20.1501	-0.0575261	CT0
20.1523	-0.0590153	CT0
20.1571	-0.0604185	CT0
20.1604	-0.0618868	CT0
20.1635	-0.0632771	CT0
20.168	-0.0647014	CT0
20.1706	-0.0662033	CT0
20.1753	-0.067549	CT0
20.1788	-0.068999	CT0
20.1821	-0.0705158	CT0
20.1848	-0.0719721	CT0
20.189	-0.0734207	CT0
20.1926	-0.074952	CT0
20.1966	-0.0764878	CT0
20.2011	-0.0780349	CT0
20.2046	-0.0795049	CT0
20.2091	-0.0810215	CT0
20.2126	-0.0825996	CT0
20.216	-0.0841928	CT0
20.221	-0.0857521	CT0
20.2238	-0.0873088	CT0
20.2285	-0.0888269	CT0
20.2319	-0.0902524	CT0
20.2364	-0.091765	CT0
20.2409	-0.093342	CT0
20.2454	-0.0948502	CT0
20.2489	-0.0962247	CT0
20.2537	-0.0978279	CT0
20.2576	-0.0995094	CT0
20.2622	-0.101039	CT0
20.266	-0.102534	CT0
20.27	-0.103971	CT0
20.2747	-0.105533	CT0
20.2794	-0.107005	CT0
20.2836	-0.108502	CT0
20.2887	-0.110068	CT0
20.2929	-0.111567	CT0
20.2971	-0.113032	CT0
20.3015	-0.114609	CT0
20.3068	-0.116216	CT0
20.3107	-0.117753	CT0
20.3163	-0.119148	CT0
20.3206	-0.120564	CT0
20.3254	-0.122003	CT0
20.3286	-0.12342	CT0
20.3336	-0.124907	CT0
20.3385	-0.126374	CT0
20.3435	-0.12792	CT0
20.3481	-0.129364	CT0
20.3525	-0.130784	CT0
20.3572	-0.132198	CT0
20.3626	-0.133605	CT0
20.3673	-0.134945	CT0
20.3724	-0.136225	CT0
20.3769	-0.137647	CT0
20.3814	-0.138985	CT0
20.3862	-0.140347	CT0
20.3916	-0.141774	CT0
20.3966	-0.14318	CT0
20.4023	-0.14452	CT0
20.4079	-0.14576	CT0
20.4121	-0.147015	CT0
20.417	-0.148308	CT0
20.4223	-0.14959	CT0
20.4272	-0.150711	CT0
20.4321	-0.152097	CT0
20.4374	-0.153465	CT0
20.4417	-0.154832	CT0
20.4479	-0.156177	CT0
20.4531	-0.157557	CT0
20.4574	-0.158888	CT0
20.4639	-0.160157	CT0
20.4694	-0.161223	CT0
20.4733	-0.162357	CT0
20.4792	-0.163509	CT0
20.4849	-0.164535	CT0
20.4899	-0.165626	CT0
20.4954	-0.166888	CT0
20.5003	-0.168094	CT0
20.5065	-0.169316	CT0
20.5107	-0.170567	CT0
20.5161	-0.171888	CT0
20.522	-0.1731	CT0
20.528	-0.174345	CT0
20.5341	-0.17539	CT0
20.539	-0.176492	CT0
20.5444	-0.177577	CT0
20.5495	-0.178598	CT0
20.5554	-0.179585	CT0
20.5601	-0.18062	CT0
20.5663	-0.181695	CT0
20.571	-0.182856	CT0
20.578	-0.184063	CT0
20.5824	-0.185179	CT0
20.5889	-0.186279	CT0
20.5941	-0.187319	CT0
20.6001	-0.188415	CT0
20.6059	-0.189551	CT0
20.6118	-0.190448	CT0
20.6176	-0.191391	CT0
20.6227	-0.192413	CT0
20.6281	-0.193405	CT0
20.6346	-0.194384	CT0
20.641	-0.195357	CT0
20.6453	-0.196401	CT0
20.652	-0.197487	CT0
20.6582	-0.198451	CT0
20.6639	-0.199428	CT0
20.6688	-0.200381	CT0
20.6755	-0.20137	CT0
20.6814	-0.202342	CT0
20.6878	-0.203382	CT0
20.6937	-0.204367	CT0
20.6981	-0.205134	CT0
20.7051	-0.20614	CT0
20.7098	-0.207121	CT0
20.7169	-0.208018	CT0
20.7234	-0.208971	CT0
20.7286	-0.209863	CT0
20.7342	-0.210674	CT0
20.7413	-0.211488	CT0
20.7463	-0.212374	CT0
20.7525	-0.213235	CT0
20.7598	-0.214135	CT0
20.7661	-0.214877	CT0
20.772	-0.215819	CT0
20.7768	-0.216762	CT0
20.7833	-0.217661	CT0
20.7895	-0.218558	CT0
20.7959	-0.21942	CT0
20.8024	-0.22028	CT0
20.8076	-0.221151	CT0
20.8145	-0.221949	CT0
20.8213	-0.222739	CT0
20.8268	-0.223585	CT0
20.8339	-0.224332	CT0
20.8388	-0.225131	CT0
20.8458	-0.225921	CT0
20.8517	-0.226621	CT0
20.8579	-0.227392	CT0
20.8641	-0.228218	CT0
20.8705	-0.229037	CT0
20.8764	-0.22994	CT0
20.8827	-0.230824	CT0
20.891	-0.231571	CT0
20.8957	-0.232386	CT0
20.9021	-0.233196	CT0
20.9088	-0.233995	CT0
20.9148	-0.234812	CT0
20.9216	-0.235498	CT0
20.9278	-0.23612	CT0
20.9345	-0.236813	CT0
20.9404	-0.237494	CT0
20.947	-0.238145	CT0
20.9542	-0.23884	CT0
20.9599	-0.239576	CT0
20.9667	-0.24039	CT0
20.9729	-0.241125	CT0
20.9805	-0.241884	CT0
20.9868	-0.242592	CT0
20.9932	-0.243232	CT0
20.9996	-0.243816	CT0
21.0058	-0.244498	CT0
21.0118	-0.245265	CT0
21.0189	-0.245712	CT0
21.0249	-0.246312	CT0
21.0324	-0.247013	CT0
21.0384	-0.247655	CT0
21.0448	-0.248343	CT0
21.0521	-0.248934	CT0
21.0587	-0.249718	CT0
21.0643	-0.250355	CT0
21.0716	-0.251006	CT0
21.0784	-0.251687	CT0
21.0849	-0.252463	CT0
21.0914	-0.253023	CT0
21.0985	-0.253624	CT0
21.1044	-0.254255	CT0
21.1119	-0.254807	CT0
21.1184	-0.255292	CT0
21.1257	-0.2558	CT0
21.1324	-0.25647	CT0
21.1385	-0.257125	CT0
21.1461	-0.257866	CT0
21.1528	-0.258602	CT0
21.1597	-0.259295	CT0
21.166	-0.259853	CT0
21.1726	-0.260383	CT0
21.1808	-0.26089	CT0
21.1866	-0.26147	CT0
21.1933	-0.261802	CT0
21.2002	-0.26234	CT0
21.2067	-0.263009	CT0
21.2133	-0.263584	CT0
21.2205	-0.264209	CT0
21.2263	-0.264952	CT0
21.2344	-0.265682	CT0
21.241	-0.266214	CT0
21.2472	-0.266652	CT0
21.2546	-0.26709	CT0
21.2613	-0.267627	CT0
21.2681	-0.268057	CT0
21.2753	-0.268537	CT0
21.2827	-0.269	CT0
21.2892	-0.269475	CT0
21.2955	-0.26992	CT0
21.3035	-0.270526	CT0
21.3101	-0.271087	CT0
21.3179	-0.271598	CT0
21.3244	-0.272043	CT0
21.3311	-0.272497	CT0
21.3382	-0.273138	CT0
21.3446	-0.273674	CT0
21.3518	-0.27413	CT0
21.3609	-0.274431	CT0
21.3672	-0.275004	CT0
21.3732	-0.275548	CT0
21.3805	-0.276052	CT0
21.3868	-0.276582	CT0
21.3944	-0.277059	CT0
21.4021	-0.277498	CT0
21.4086	-0.278068	CT0
21.4154	-0.278564	CT0
21.4219	-0.279091	CT0
21.4299	-0.27944	CT0
21.4373	-0.279772	CT0
21.4442	-0.280203	CT0
21.4507	-0.280673	CT0
21.4583	-0.281124	CT0
21.4655	-0.281634	CT0
21.4725	-0.282159	CT0
21.4785	-0.282514	CT0
21.4863	-0.283067	CT0
21.4934	-0.283399	CT0
21.5011	-0.283888	CT0
21.5071	-0.284297	CT0
21.5156	-0.284701	CT0
21.5225	-0.285221	CT0
21.5299	-0.285598	CT0
21.5373	-0.286038	CT0
21.5433	-0.286484	CT0
21.5515	-0.286855	CT0
21.5585	-0.287219	CT0
21.566	-0.287594	CT0
21.5719	-0.287905	CT0
21.5808	-0.288213	CT0
21.5877	-0.288587	CT0
21.5958	-0.288934	CT0
21.6026	-0.289451	CT0
21.6094	-0.289888	CT0
21.6166	-0.29036	CT0
21.623	-0.290779	CT0
21.6303	-0.29109	CT0
21.6379	-0.291491	CT0
21.6448	-0.291978	CT0
21.6532	-0.292368	CT0
21.6599	-0.292643	CT0
21.667	-0.292987	CT0
21.675	-0.293391	CT0
21.6822	-0.293849	CT0
21.6897	-0.294298	CT0
21.6969	-0.294768	CT0
21.7039	-0.295013	CT0
21.7117	-0.29534	CT0
21.7192	-0.295618	CT0
21.7257	-0.296009	CT0
21.7329	-0.296516	CT0
21.7401	-0.296733	CT0
21.7477	-0.296913	CT0
21.7547	-0.297174	CT0
21.7626	-0.297494	CT0
21.7701	-0.297868	CT0
21.7779	-0.298189	CT0
21.7854	-0.298368	CT0
21.7932	-0.298699	CT0
21.8003	-0.298936	CT0
21.8074	-0.299361	CT0
21.815	-0.29992	CT0
21.8224	-0.300339	CT0
21.8285	-0.30072	CT0
21.837	-0.301152	CT0
21.843	-0.301364	CT0
21.8514	-0.301931	CT0
21.859	-0.302318	CT0
21.8668	-0.302603	CT0
21.874	-0.302968	CT0
21.8813	-0.303166	CT0
21.8892	-0.303404	CT0
21.8971	-0.303707	CT0
21.904	-0.303893	CT0
21.9113	-0.304153	CT0
21.9196	-0.304461	CT0
21.9263	-0.30459	CT0
21.9345	-0.304874	CT0
21.9414	-0.30519	CT0
21.9481	-0.305654	CT0
21.9567	-0.306116	CT0
21.9643	-0.306355	CT0
21.9709	-0.306648	CT0
21.9798	-0.306912	CT0
21.9871	-0.307163	CT0
21.9945	-0.307367	CT0
22.0017	-0.307663	CT0
22.0096	-0.307931	CT0
22.0169	-0.308134	CT0
22.0243	-0.308386	CT0
22.0321	-0.308592	CT0
22.0389	-0.309016	CT0
22.0471	-0.309298	CT0
22.0547	-0.309587	CT0
22.0607	-0.309898	CT0
22.0687	-0.310277	CT0
22.0762	-0.310511	CT0
22.0846	-0.310901	CT0
22.0933	-0.3112	CT0
22.1003	-0.311494	CT0
22.1082	-0.311786	CT0
22.1154	-0.311913	CT0
22.1229	-0.312143	CT0
22.1305	-0.312264	CT0
22.1374	-0.312348	CT0
22.1455	-0.312491	CT0
22.1537	-0.312778	CT0
22.1603	-0.312928	CT0
22.169	-0.313197	CT0
22.1759	-0.313479	CT0
22.1848	-0.313769	CT0
22.192	-0.314139	CT0
22.1993	-0.3145	CT0
22.2079	-0.314777	CT0
22.2144	-0.315111	CT0
22.222	-0.315334	CT0
22.2301	-0.315555	CT0
22.2379	-0.315761	CT0
22.2442	-0.315985	CT0
22.2523	-0.316139	CT0
22.2597	-0.316243	CT0
22.268	-0.31635	CT0
22.2763	-0.316518	CT0
22.2832	-0.316713	CT0
22.291	-0.316874	CT0
22.2994	-0.31718	CT0
22.3064	-0.317445	CT0
22.3151	-0.317737	CT0
22.3215	-0.317982	CT0
22.3297	-0.318163	CT0
22.3373	-0.318414	CT0
22.3445	-0.318674	CT0
22.3522	-0.318811	CT0
22.3611	-0.318969	CT0
22.3682	-0.319133	CT0
22.3758	-0.319387	CT0
22.3837	-0.31975	CT0
22.3912	-0.32014	CT0
22.399	-0.320366	CT0
22.4064	-0.320626	CT0
22.414	-0.320735	CT0
22.4222	-0.320944	CT0
22.4304	-0.321046	CT0
22.4384	-0.321272	CT0
22.4452	-0.3213	CT0
22.4531	-0.321313	CT0
22.4611	-0.321532	CT0
22.4682	-0.321841	CT0
22.4761	-0.322113	CT0
22.4834	-0.322356	CT0
22.4916	-0.3226	CT0
22.4988	-0.322762	CT0
22.5068	-0.322869	CT0
22.5144	-0.32304	CT0
22.5222	-0.323162	CT0
22.5305	-0.32321	CT0
22.5386	-0.323361	CT0
22.5464	-0.323556	CT0
22.5546	-0.323783	CT0
22.5625	-0.32406	CT0
22.5705	-0.324351	CT0
22.5776	-0.324506	CT0
22.5863	-0.324603	CT0
22.5937	-0.324687	CT0
22.6004	-0.324807	CT0
22.6086	-0.32495	CT0
22.6171	-0.325152	CT0
22.6244	-0.325392	CT0
22.6319	-0.325518	CT0
22.6404	-0.325669	CT0
22.6485	-0.325939	CT0
22.6555	-0.326091	CT0
22.664	-0.326317	CT0
22.6716	-0.326306	CT0
22.678	-0.326381	CT0
22.6879	-0.326509	CT0
22.6956	-0.326572	CT0
22.7024	-0.326743	CT0
22.711	-0.326968	CT0
22.7186	-0.327159	CT0
22.7272	-0.327414	CT0
22.734	-0.327608	CT0
22.7422	-0.327791	CT0
22.7497	-0.327954	CT0
22.7574	-0.328092	CT0
22.7652	-0.328291	CT0
22.7726	-0.32846	CT0
22.7809	-0.328537	CT0
22.7888	-0.328626	CT0
22.7972	-0.328823	CT0
22.804	-0.329032	CT0
22.8114	-0.329225	CT0
22.8205	-0.329348	CT0
22.8279	-0.329494	CT0
22.8363	-0.329666	CT0
22.8439	-0.329889	CT0
22.8525	-0.330152	CT0
22.8586	-0.330223	CT0
22.8663	-0.330398	CT0
22.8749	-0.330456	CT0
22.8832	-0.330512	CT0
22.8918	-0.330576	CT0
22.8982	-0.330596	CT0
22.9075	-0.330672	CT0
22.9146	-0.330787	CT0
22.9235	-0.330874	CT0
22.9302	-0.331031	CT0
22.9386	-0.331283	CT0
22.947	-0.331425	CT0
22.9553	-0.331577	CT0
22.9626	-0.331669	CT0
22.9708	-0.3318	CT0
22.9792	-0.331958	CT0
22.9867	-0.332018	CT0
22.9946	-0.332081	CT0
23.0026	-0.332168	CT0
23.0118	-0.33225	CT0
23.0179	-0.332408	CT0
23.0263	-0.33267	CT0
23.0337	-0.33288	CT0
23.0415	-0.333107	CT0
23.049	-0.333249	CT0
23.0579	-0.33345	CT0
23.0658	-0.333662	CT0
23.0741	-0.333916	CT0
23.0813	-0.333979	CT0
23.0903	-0.334037	CT0
23.0979	-0.334092	CT0
23.1054	-0.334129	CT0
23.1135	-0.334159	CT0
23.1217	-0.334179	CT0
23.1296	-0.334256	CT0
23.1367	-0.33436	CT0
23.1449	-0.334445	CT0
23.1531	-0.334603	CT0
23.1612	-0.33485	CT0
23.1695	-0.335019	CT0
23.1765	-0.3352	CT0
23.1849	-0.335388	CT0
23.1933	-0.335455	CT0
23.2006	-0.335606	CT0
23.2094	-0.335697	CT0
23.2177	-0.335802	CT0
23.2253	-0.335826	CT0
23.234	-0.335811	CT0
23.2423	-0.335839	CT0
23.2493	-0.335892	CT0
23.2582	-0.33598	CT0
23.266	-0.336102	CT0
23.2742	-0.336271	CT0
23.2825	-0.336399	CT0
23.2894	-0.336567	CT0
23.2969	-0.336739	CT0
23.3048	-0.336864	CT0
23.313	-0.336951	CT0
23.3206	-0.337016	CT0
23.3292	-0.337103	CT0
23.3363	-0.33715	CT0
23.3455	-0.337189	CT0
23.353	-0.33726	CT0
23.3622	-0.33743	CT0
23.3697	-0.337563	CT0
23.3783	-0.337654	CT0
23.3856	-0.337775	CT0
23.3937	-0.33784	CT0
23.4022	-0.337928	CT0
23.411	-0.338042	CT0
23.4178	-0.338177	CT0
23.4259	-0.338322	CT0
23.4339	-0.338528	CT0
23.4416	-0.338722	CT0
23.4502	-0.338868	CT0
23.4575	-0.338965	CT0
23.4659	-0.339115	CT0
23.4738	-0.33922	CT0
23.4821	-0.339256	CT0
23.489	-0.339241	CT0
23.4979	-0.339231	CT0
23.5068	-0.339238	CT0
23.5148	-0.339275	CT0
23.5225	-0.339387	CT0
23.5315	-0.339562	CT0
23.538	-0.339703	CT0
23.547	-0.339833	CT0
23.5552	-0.339999	CT0
23.5629	-0.340128	CT0
23.5708	-0.340221	CT0
23.579	-0.340241	CT0
23.587	-0.340273	CT0
23.5954	-0.340333	CT0
23.6032	-0.340389	CT0
23.6104	-0.340492	CT0
23.6186	-0.340575	CT0
23.6269	-0.340675	CT0
23.6352	-0.340842	CT0
23.6433	-0.34094	CT0
23.6513	-0.340977	CT0
23.659	-0.340997	CT0
23.667	-0.341	CT0
23.6753	-0.341024	CT0
23.6833	-0.341047	CT0
23.6915	-0.341082	CT0
23.7002	-0.341126	CT0
23.7075	-0.341178	CT0
23.716	-0.341236	CT0
23.7236	-0.341336	CT0
23.7317	-0.341469	CT0
23.7406	-0.341572	CT0
23.7488	-0.341692	CT0
23.7563	-0.34177	CT0
23.7646	-0.341864	CT0
23.7724	-0.341972	CT0
23.781	-0.342079	CT0
23.7882	-0.342161	CT0
23.797	-0.342209	CT0
23.8052	-0.342249	CT0
23.8124	-0.342255	CT0
23.8208	-0.342281	CT0
23.8286	-0.342323	CT0
23.837	-0.342377	CT0
23.8446	-0.342419	CT0
23.853	-0.342465	CT0
23.8619	-0.34257	CT0
23.869	-0.342705	CT0
23.8774	-0.342819	CT0
23.8858	-0.342896	CT0
23.894	-0.342957	CT0
23.9022	-0.342982	CT0
23.9094	-0.343019	CT0
23.9179	-0.343045	CT0
23.9266	-0.343109	CT0
23.9349	-0.343169	CT0
23.9422	-0.343271	CT0
23.9513	-0.343423	CT0
23.9588	-0.343633	CT0
23.9669	-0.343811	CT0
23.9746	-0.343907	CT0
23.9831	-0.343997	CT0
23.9911	-0.344034	CT0
23.9996	-0.344044	CT0
24.0084	-0.344032	CT0
24.0161	-0.344015	CT0
24.0252	-0.344004	CT0
24.0323	-0.343999	CT0
24.0405	-0.344013	CT0
24.048	-0.344074	CT0
24.0563	-0.34412	CT0
24.0648	-0.344177	CT0
24.0732	-0.344238	CT0
24.0814	-0.344325	CT0
24.0886	-0.344412	CT0
24.097	-0.344464	CT0
24.1055	-0.344521	CT0
24.1134	-0.344587	CT0
24.1215	-0.344651	CT0
24.13	-0.344695	CT0
24.1382	-0.344746	CT0
24.1465	-0.344803	CT0
24.1543	-0.344857	CT0
24.1623	-0.344913	CT0
24.1705	-0.344968	CT0
24.179	-0.345044	CT0
24.1869	-0.345151	CT0
24.195	-0.345332	CT0
24.2035	-0.345493	CT0
24.2123	-0.34565	CT0
24.2204	-0.345745	CT0
24.2277	-0.345799	CT0
24.2358	-0.345848	CT0
24.2442	-0.345888	CT0
24.2514	-0.345912	CT0
24.2603	-0.345924	CT0
24.2671	-0.345926	CT0
24.2767	-0.345924	CT0
24.2834	-0.345922	CT0
24.2927	-0.345918	CT0
24.3015	-0.345917	CT0
24.31	-0.345928	CT0
24.3171	-0.345945	CT0
24.326	-0.34598	CT0
24.3341	-0.346026	CT0
24.342	-0.346087	CT0
24.35	-0.34618	CT0
24.3579	-0.34627	CT0
24.3659	-0.346333	CT0
24.3733	-0.346378	CT0
24.3817	-0.346428	CT0
24.3903	-0.346462	CT0
24.3984	-0.346502	CT0
24.4065	-0.346537	CT0
24.4156	-0.346578	CT0
24.4235	-0.346625	CT0
24.4314	-0.346694	CT0
24.4398	-0.346801	CT0
24.448	-0.346875	CT0
24.4565	-0.346932	CT0
24.4641	-0.346978	CT0
24.4728	-0.347025	CT0
24.4808	-0.347055	CT0
24.4894	-0.347077	CT0
24.4973	-0.347092	CT0
24.5052	-0.347099	CT0
24.5128	-0.347107	CT0
24.5213	-0.347112	CT0
24.53	-0.347121	CT0
24.5379	-0.347133	CT0
24.5457	-0.347148	CT0
24.5547	-0.347168	CT0
24.5621	-0.347193	CT0
24.5704	-0.347228	CT0
24.5789	-0.347291	CT0
24.5871	-0.347359	CT0
24.5953	-0.347426	CT0
24.604	-0.347498	CT0
24.6124	-0.347565	CT0
24.6198	-0.347627	CT0
24.6281	-0.347667	CT0
24.6353	-0.347708	CT0
24.6447	-0.347754	CT0
24.6521	-0.347793	CT0
24.6605	-0.347842	CT0
24.6685	-0.347885	CT0
24.6774	-0.347916	CT0
24.6844	-0.34794	CT0
24.6943	-0.347972	CT0
24.702	-0.34802	CT0
24.7088	-0.34808	CT0
24.7172	-0.348105	CT0
24.7258	-0.348127	CT0
24.7348	-0.348148	CT0
24.7419	-0.348185	CT0
24.7494	-0.348226	CT0
24.7589	-0.348244	CT0
24.7669	-0.348259	CT0
24.7747	-0.348281	CT0
24.7823	-0.348327	CT0
24.792	-0.348374	CT0
24.7996	-0.348412	CT0
24.8081	-0.348444	CT0
24.8162	-0.348472	CT0
24.8246	-0.348506	CT0
24.8337	-0.34856	CT0
24.8414	-0.34861	CT0
24.8491	-0.348644	CT0
24.858	-0.348655	CT0
24.8654	-0.348668	CT0
24.8734	-0.348694	CT0
24.8822	-0.348715	CT0
24.8904	-0.348729	CT0
24.8979	-0.348745	CT0
24.9054	-0.348767	CT0
24.9155	-0.348807	CT0
24.9233	-0.348854	CT0
24.9317	-0.348911	CT0
24.9393	-0.348963	CT0
24.9482	-0.349006	CT0
24.956	-0.349039	CT0
24.963	-0.349089	CT0
24.9729	-0.349142	CT0
24.9809	-0.34918	CT0
24.9881	-0.349211	CT0
24.9965	-0.349237	CT0
25.0045	-0.349266	CT0
25.013	-0.349295	CT0
25.0215	-0.34932	CT0
25.03	-0.349333	CT0
25.0376	-0.349341	CT0
25.0467	-0.349349	CT0
25.0548	-0.349363	CT0
25.0627	-0.349385	CT0
25.0709	-0.349413	CT0
25.0787	-0.349437	CT0
25.0875	-0.349474	CT0
25.0954	-0.349506	CT0
25.1041	-0.349548	CT0
25.1117	-0.349596	CT0
25.1196	-0.349666	CT0
25.1283	-0.34971	CT0
25.1367	-0.349746	CT0
25.1445	-0.349785	CT0
25.1536	-0.349829	CT0
25.1623	-0.349861	CT0
25.1702	-0.349883	CT0
25.1786	-0.349895	CT0
25.1864	-0.349901	CT0
25.1955	-0.349906	CT0
25.2028	-0.34991	CT0
25.212	-0.349919	CT0
25.2196	-0.349928	CT0
25.2269	-0.34995	CT0
25.2353	-0.349979	CT0
25.244	-0.350011	CT0
25.2517	-0.35005	CT0
25.2596	-0.350087	CT0
25.2691	-0.350116	CT0
25.2764	-0.350148	CT0
25.2853	-0.350178	CT0
25.2928	-0.3502	CT0
25.302	-0.35022	CT0
25.3095	-0.350232	CT0
25.3185	-0.350245	CT0
25.3269	-0.350259	CT0
25.3336	-0.35028	CT0
25.3422	-0.350307	CT0
25.3508	-0.350334	CT0
25.3587	-0.350363	CT0
25.3675	-0.350399	CT0
25.375	-0.350441	CT0
25.3835	-0.350477	CT0
25.3923	-0.350514	CT0
25.4001	-0.350539	CT0
25.4082	-0.350553	CT0
25.4169	-0.350565	CT0
25.4247	-0.350574	CT0
25.433	-0.350587	CT0
25.4412	-0.350601	CT0
25.4507	-0.350612	CT0
25.4584	-0.350622	CT0
25.4662	-0.350635	CT0
25.4736	-0.350655	CT0
25.4818	-0.350683	CT0
25.4912	-0.350714	CT0
25.4985	-0.350748	CT0
25.5068	-0.350783	CT0
25.5145	-0.350812	CT0
25.5236	-0.350831	CT0
25.533	-0.350841	CT0
25.5405	-0.350846	CT0
25.5492	-0.350868	CT0
25.5562	-0.350881	CT0
25.5654	-0.350885	CT0
25.5735	-0.350894	CT0
25.5816	-0.350917	CT0
25.5896	-0.350952	CT0
25.5984	-0.350984	CT0
25.6063	-0.35101	CT0
25.614	-0.351032	CT0
25.6225	-0.351041	CT0
25.631	-0.351046	CT0
25.6398	-0.351051	CT0
25.648	-0.351058	CT0
25.6565	-0.351067	CT0
25.665	-0.351077	CT0
25.6724	-0.351099	CT0
25.6814	-0.351144	CT0
25.6894	-0.351187	CT0
25.6969	-0.35126	CT0
25.7052	-0.351334	CT0
25.7138	-0.351384	CT0
25.7225	-0.351418	CT0
25.7313	-0.351437	CT0
25.7386	-0.35145	CT0
25.7475	-0.35146	CT0
25.7555	-0.351466	CT0
25.7629	-0.351478	CT0
25.7716	-0.351493	CT0
25.7791	-0.351497	CT0
25.7873	-0.351508	CT0
25.796	-0.351525	CT0
25.8043	-0.351561	CT0
25.8129	-0.351615	CT0
25.8201	-0.351664	CT0
25.8295	-0.351709	CT0
25.8383	-0.351744	CT0
25.8469	-0.351764	CT0
25.8546	-0.351773	CT0
25.8623	-0.351779	CT0
25.8709	-0.351802	CT0
25.878	-0.351818	CT0
25.8872	-0.351822	CT0
25.8959	-0.351828	CT0
25.9038	-0.351833	CT0
25.9132	-0.351837	CT0
25.9204	-0.351843	CT0
25.9292	-0.351851	CT0
25.9361	-0.351859	CT0
25.9448	-0.351874	CT0
25.9521	-0.351885	CT0
25.9618	-0.351894	CT0
25.9701	-0.3519	CT0
25.9785	-0.351918	CT0
25.986	-0.351946	CT0
25.9947	-0.351959	CT0
26.003	-0.351972	CT0
26.0108	-0.351978	CT0
26.0196	-0.351983	CT0
26.0274	-0.351991	CT0
26.0356	-0.351997	CT0
26.0437	-0.352003	CT0
26.0516	-0.352009	CT0
26.0612	-0.352017	CT0
26.068	-0.352036	CT0
26.077	-0.352083	CT0
26.0853	-0.352129	CT0
26.0931	-0.352162	CT0
26.1024	-0.35219	CT0
26.1099	-0.352237	CT0
26.1184	-0.352272	CT0
26.1273	-0.352301	CT0
26.1346	-0.352318	CT0
26.1431	-0.352324	CT0
26.1519	-0.352331	CT0
26.1609	-0.352337	CT0
26.1693	-0.352343	CT0
26.1766	-0.35235	CT0
26.1853	-0.352358	CT0
26.1928	-0.352371	CT0
26.2026	-0.352399	CT0
26.2097	-0.35243	CT0
26.2177	-0.352454	CT0
26.2258	-0.352469	CT0
26.2344	-0.352484	CT0
26.2427	-0.352492	CT0
26.2515	-0.352497	CT0
26.2594	-0.352502	CT0
26.2677	-0.352507	CT0
26.2763	-0.352512	CT0
26.285	-0.352518	CT0
26.2922	-0.352544	CT0
26.2997	-0.35257	CT0
26.309	-0.352597	CT0
26.3172	-0.352621	CT0
26.3246	-0.352641	CT0
26.3332	-0.352651	CT0
26.3416	-0.352659	CT0
26.3497	-0.352667	CT0
26.3595	-0.352673	CT0
26.3672	-0.352684	CT0
26.3755	-0.35269	CT0
26.3833	-0.352697	CT0
26.3914	-0.352705	CT0
26.4011	-0.352714	CT0
26.4088	-0.352726	CT0
26.4162	-0.352738	CT0
26.4258	-0.352745	CT0
26.4331	-0.352751	CT0
26.4409	-0.352758	CT0
26.4504	-0.352766	CT0
26.4584	-0.352779	CT0
26.4668	-0.352791	CT0
26.4752	-0.352799	CT0
26.4835	-0.35281	CT0
26.4915	-0.352819	CT0
26.4994	-0.352827	CT0
26.5074	-0.352835	CT0
26.5161	-0.352843	CT0
26.5247	-0.35285	CT0
26.5319	-0.352858	CT0
26.5408	-0.352866	CT0
26.5494	-0.352878	CT0
26.5568	-0.352888	CT0
26.5662	-0.3529	CT0
26.5739	-0.352907	CT0
26.5831	-0.352915	CT0
26.5911	-0.352923	CT0
26.5992	-0.352931	CT0
26.6075	-0.35294	CT0
26.6157	-0.352951	CT0
26.6245	-0.352961	CT0
26.6322	-0.352969	CT0
26.6403	-0.352977	CT0
26.6481	-0.352985	CT0
26.6564	-0.352992	CT0
26.665	-0.353001	CT0
26.6742	-0.35301	CT0
26.6823	-0.353017	CT0
26.6905	-0.353026	CT0
26.6989	-0.353034	CT0
26.7072	-0.353042	CT0
26.7144	-0.353051	CT0
26.7238	-0.353065	CT0
26.7304	-0.353091	CT0
26.7403	-0.353118	CT0
26.7473	-0.35313	CT0
26.7568	-0.353144	CT0
26.764	-0.353159	CT0
26.7723	-0.353169	CT0
26.7812	-0.353181	CT0
26.7888	-0.353188	CT0
26.7978	-0.353195	CT0
26.8064	-0.353201	CT0
26.815	-0.353208	CT0
26.8226	-0.353215	CT0
26.8308	-0.353223	CT0
26.8399	-0.353231	CT0
26.8463	-0.353241	CT0
26.8555	-0.35325	CT0
26.8648	-0.353258	CT0
26.8717	-0.353267	CT0
26.8813	-0.353275	CT0
26.8889	-0.353283	CT0
26.8962	-0.353292	CT0
26.9059	-0.3533	CT0
26.915	-0.353312	CT0
26.9217	-0.353321	CT0
26.9311	-0.353329	CT0
26.9388	-0.353338	CT0
26.9473	-0.353346	CT0
26.956	-0.353355	CT0
26.9641	-0.353363	CT0
26.9719	-0.35337	CT0
26.9808	-0.353379	CT0
26.9887	-0.353386	CT0
26.9971	-0.353395	CT0
27.0055	-0.353403	CT0
27.0133	-0.353414	CT0
27.022	-0.353426	CT0
27.031	-0.35344	CT0
27.039	-0.353449	CT0
27.0472	-0.353463	CT0
27.055	-0.353471	CT0
27.0632	-0.35348	CT0
27.0717	-0.353489	CT0
27.0805	-0.353498	CT0
27.0885	-0.353508	CT0
27.0967	-0.353516	CT0
27.1058	-0.353524	CT0
27.1137	-0.353532	CT0
27.1217	-0.353541	CT0
27.13	-0.353549	CT0
27.1379	-0.353556	CT0
27.1459	-0.353564	CT0
27.1541	-0.353573	CT0
27.1624	-0.353582	CT0
27.17	-0.353595	CT0
27.1796	-0.353605	CT0
27.1881	-0.353614	CT0
27.1957	-0.353622	CT0
27.2045	-0.353631	CT0
27.213	-0.35364	CT0
27.2219	-0.353648	CT0
27.2298	-0.353656	CT0
27.2377	-0.353664	CT0
27.2459	-0.353673	CT0
27.2552	-0.353683	CT0
27.2629	-0.353697	CT0
27.2721	-0.353709	CT0
27.2795	-0.353731	CT0
27.2877	-0.353755	CT0
27.2956	-0.353765	CT0
27.3039	-0.353777	CT0
27.3133	-0.353786	CT0
27.3198	-0.353795	CT0
27.3287	-0.353804	CT0
27.3372	-0.353812	CT0
27.3455	-0.353819	CT0
27.3543	-0.353826	CT0
27.3628	-0.353833	CT0
27.3711	-0.35384	CT0
27.3797	-0.353848	CT0
27.3874	-0.353855	CT0
27.3961	-0.353865	CT0
27.4043	-0.353875	CT0
27.4116	-0.353891	CT0
27.42	-0.353913	CT0
27.4292	-0.353932	CT0
27.4369	-0.353945	CT0
27.4446	-0.353954	CT0
27.4532	-0.353963	CT0
27.4624	-0.353971	CT0
27.4697	-0.353979	CT0
27.4788	-0.353986	CT0
27.4866	-0.353993	CT0
27.4955	-0.353999	CT0
27.5036	-0.354007	CT0
27.5113	-0.354013	CT0
27.5199	-0.35402	CT0
27.5284	-0.354028	CT0
27.5372	-0.354036	CT0
27.5457	-0.354047	CT0
27.5528	-0.354058	CT0
27.5622	-0.354076	CT0
27.57	-0.354097	CT0
27.5788	-0.354115	CT0
27.587	-0.35413	CT0
27.5953	-0.354139	CT0
27.6031	-0.354148	CT0
27.6114	-0.354155	CT0
27.6195	-0.354163	CT0
27.6274	-0.354169	CT0
27.6354	-0.354176	CT0
27.6452	-0.354182	CT0
27.6536	-0.35419	CT0
27.6603	-0.354198	CT0
27.6697	-0.354209	CT0
27.6783	-0.354228	CT0
27.6875	-0.354245	CT0
27.695	-0.354259	CT0
27.7036	-0.354276	CT0
27.7117	-0.354292	CT0
27.72	-0.354301	CT0
27.7286	-0.354309	CT0
27.7361	-0.354318	CT0
27.7438	-0.354325	CT0
27.7526	-0.354333	CT0
27.7602	-0.354342	CT0
27.7692	-0.354351	CT0
27.7776	-0.354359	CT0
27.7857	-0.354368	CT0
27.7935	-0.354377	CT0
27.8027	-0.354385	CT0
27.8112	-0.354393	CT0
27.8191	-0.3544	CT0
27.828	-0.354407	CT0
27.8365	-0.354415	CT0
27.8446	-0.35442	CT0
27.8517	-0.354426	CT0
27.8605	-0.354432	CT0
27.8688	-0.354438	CT0
27.8771	-0.354444	CT0
27.8849	-0.354451	CT0
27.8926	-0.354458	CT0
27.9023	-0.354466	CT0
27.9103	-0.354475	CT0
27.9181	-0.354483	CT0
27.9272	-0.354492	CT0
27.9355	-0.354505	CT0
27.9441	-0.354513	CT0
27.9525	-0.354521	CT0
27.9603	-0.354529	CT0
27.9686	-0.354536	CT0
27.9772	-0.354543	CT0
27.9853	-0.35455	CT0
27.9933	-0.354556	CT0
28.0026	-0.354562	CT0
28.0105	-0.354568	CT0
28.018	-0.354574	CT0
28.0272	-0.35458	CT0
28.0352	-0.354587	CT0
28.044	-0.354594	CT0
28.0504	-0.354602	CT0
28.0595	-0.354613	CT0
28.069	-0.354633	CT0
28.0765	-0.354655	CT0
28.0856	-0.354681	CT0
28.0935	-0.354692	CT0
28.1021	-0.3547	CT0
28.1102	-0.354707	CT0
28.1191	-0.354714	CT0
28.1261	-0.35472	CT0
28.1354	-0.354726	CT0
28.1435	-0.354732	CT0
28.1509	-0.354738	CT0
28.1602	-0.354744	CT0
28.1678	-0.35475	CT0
28.1766	-0.354757	CT0
28.1848	-0.354763	CT0
28.1936	-0.354769	CT0
28.2016	-0.354775	CT0
28.2099	-0.354781	CT0
28.2178	-0.354787	CT0
28.2262	-0.354794	CT0
28.2339	-0.354806	CT0
28.243	-0.354813	CT0
28.2509	-0.354821	CT0
28.2598	-0.354829	CT0
28.2677	-0.354836	CT0
28.2757	-0.354842	CT0
28.2841	-0.354848	CT0
28.2924	-0.354855	CT0
28.3005	-0.354863	CT0
28.31	-0.354871	CT0
28.3181	-0.354882	CT0
28.3262	-0.354902	CT0
28.3347	-0.354913	CT0
28.3433	-0.354929	CT0
28.3515	-0.354937	CT0
28.3595	-0.354944	CT0
28.3675	-0.35495	CT0
28.3761	-0.354955	CT0
28.3848	-0.354961	CT0
28.3928	-0.354967	CT0
28.402	-0.354974	CT0
28.4101	-0.354981	CT0
28.4182	-0.354989	CT0
28.4264	-0.354996	CT0
28.4344	-0.355004	CT0
28.4433	-0.355011	CT0
28.4514	-0.355018	CT0
28.4589	-0.355024	CT0
28.4676	-0.35503	CT0
28.4756	-0.355036	CT0
28.4846	-0.355042	CT0
28.4921	-0.355048	CT0
28.5012	-0.355054	CT0
28.5092	-0.355061	CT0
28.5178	-0.355068	CT0
28.5261	-0.355074	CT0
28.5341	-0.355081	CT0
28.5421	-0.355088	CT0
28.5513	-0.355096	CT0
28.5597	-0.355104	CT0
28.568	-0.355113	CT0
28.576	-0.355121	CT0
28.5848	-0.355131	CT0
28.5935	-0.355149	CT0
28.5997	-0.355167	CT0
28.6084	-0.355174	CT0
28.6178	-0.355181	CT0
28.6266	-0.355188	CT0
28.6346	-0.355195	CT0
28.6421	-0.355202	CT0
28.6515	-0.355209	CT0
28.6592	-0.355216	CT0
28.6672	-0.355223	CT0
28.676	-0.355231	CT0
28.6843	-0.355239	CT0
28.6926	-0.355247	CT0
28.7012	-0.355255	CT0
28.71	-0.355263	CT0
28.7181	-0.35527	CT0
28.7268	-0.355277	CT0
28.7349	-0.355282	CT0
28.7433	-0.355289	CT0
28.7515	-0.355295	CT0
28.7599	-0.355302	CT0
28.7679	-0.355309	CT0
28.7765	-0.355316	CT0
28.784	-0.355323	CT0
28.7927	-0.35533	CT0
28.8016	-0.355337	CT0
28.8099	-0.355345	CT0
28.8176	-0.355352	CT0
28.826	-0.35536	CT0
28.8342	-0.355368	CT0
28.8423	-0.355375	CT0
28.8509	-0.355383	CT0
28.8592	-0.355394	CT0
28.8671	-0.355402	CT0
28.8767	-0.35541	CT0
28.8844	-0.355417	CT0
28.8925	-0.355424	CT0
28.9015	-0.35543	CT0
28.9093	-0.355435	CT0
28.9176	-0.35544	CT0
28.9254	-0.355445	CT0
28.934	-0.355451	CT0
28.9421	-0.355456	CT0
28.9497	-0.355463	CT0
28.9588	-0.35547	CT0
28.9659	-0.355478	CT0
28.9751	-0.355485	CT0
28.9843	-0.355493	CT0
28.9918	-0.3555	CT0
29.0006	-0.355507	CT0
29.0087	-0.355513	CT0
29.0167	-0.355519	CT0
29.0257	-0.355524	CT0
29.0338	-0.355529	CT0
29.0425	-0.355533	CT0
29.0496	-0.355538	CT0
29.0588	-0.355543	CT0
29.0666	-0.355547	CT0
29.0753	-0.35555	CT0
29.084	-0.355554	CT0
29.0921	-0.355559	CT0
29.101	-0.355564	CT0
29.1087	-0.35557	CT0
29.1177	-0.355576	CT0
29.1261	-0.355582	CT0
29.134	-0.355588	CT0
29.1422	-0.355594	CT0
29.1509	-0.355601	CT0
29.1588	-0.355607	CT0
29.1672	-0.355613	CT0
29.1756	-0.355619	CT0
29.1839	-0.355624	CT0
29.1927	-0.355629	CT0
29.2006	-0.355634	CT0
29.2096	-0.355639	CT0
29.2168	-0.355643	CT0
29.2248	-0.355647	CT0
29.2331	-0.35565	CT0
29.2423	-0.355654	CT0
29.2492	-0.35566	CT0
29.2585	-0.355666	CT0
29.2671	-0.355671	CT0
29.2759	-0.355677	CT0
29.283	-0.355682	CT0
29.2927	-0.355688	CT0
29.301	-0.355693	CT0
29.3087	-0.3557	CT0
29.3173	-0.355706	CT0
29.3246	-0.35571	CT0
29.3334	-0.355715	CT0
29.342	-0.35572	CT0
29.3505	-0.355724	CT0
29.3593	-0.355729	CT0
29.3671	-0.355734	CT0
29.3757	-0.355739	CT0
29.3834	-0.355745	CT0
29.3924	-0.355751	CT0
29.4005	-0.355757	CT0
29.4079	-0.355763	CT0
29.4167	-0.355769	CT0
29.4245	-0.355774	CT0
29.4332	-0.355782	CT0
29.4413	-0.355787	CT0
29.4494	-0.355793	CT0
29.4586	-0.355799	CT0
29.4671	-0.355804	CT0
29.4756	-0.355808	CT0
29.4842	-0.355811	CT0
29.4917	-0.355814	CT0
29.5004	-0.355816	CT0
29.509	-0.355819	CT0
29.5176	-0.355822	CT0
29.5241	-0.355826	CT0
29.5336	-0.355829	CT0
29.5422	-0.355834	CT0
29.5504	-0.355839	CT0
29.5586	-0.355845	CT0
29.5665	-0.355852	CT0
29.576	-0.355857	CT0
29.5839	-0.355862	CT0
29.5923	-0.355867	CT0
29.6008	-0.355871	CT0
29.6088	-0.355875	CT0
29.6165	-0.355878	CT0
29.6255	-0.35588	CT0
29.6334	-0.355881	CT0
29.6416	-0.355884	CT0
29.6499	-0.355887	CT0
29.6579	-0.355891	CT0
29.6675	-0.355896	CT0
29.675	-0.355901	CT0
29.683	-0.355908	CT0
29.6919	-0.355913	CT0
29.7012	-0.355918	CT0
29.7085	-0.355923	CT0
29.7165	-0.355926	CT0
29.7249	-0.35593	CT0
29.7337	-0.355933	CT0
29.7425	-0.355936	CT0
29.75	-0.355939	CT0
29.7583	-0.355943	CT0
29.7673	-0.355946	CT0
29.7757	-0.35595	CT0
29.784	-0.355954	CT0
29.7922	-0.355958	CT0
29.8005	-0.355962	CT0
29.8091	-0.355968	CT0
29.8167	-0.355972	CT0
29.8252	-0.355978	CT0
29.835	-0.355983	CT0
29.8419	-0.355987	CT0
29.8509	-0.355993	CT0
29.8598	-0.355998	CT0
29.8672	-0.356003	CT0
29.8747	-0.356009	CT0
29.883	-0.356013	CT0
29.8909	-0.356018	CT0
29.899	-0.356024	CT0
29.9077	-0.356029	CT0
29.9167	-0.356033	CT0
29.925	-0.356037	CT0
29.9335	-0.35604	CT0
29.942	-0.356043	CT0
29.9504	-0.356046	CT0
29.9593	-0.356051	CT0
29.9662	-0.356054	CT0
29.9758	-0.356058	CT0
29.9833	-0.356062	CT0
29.9922	-0.356068	CT0
30	-0.356075	CT0
30.0081	-0.356085	CT0
30.0173	-0.356093	CT0
30.0256	-0.356098	CT0
30.0341	-0.356104	CT0
30.0422	-0.356108	CT0
30.0508	-0.356113	CT0
30.0581	-0.356116	CT0
30.0669	-0.356119	CT0
30.0741	-0.356121	CT0
30.0828	-0.356123	CT0
30.0917	-0.356125	CT0
30.0989	-0.356127	CT0
30.1089	-0.356131	CT0
30.1164	-0.356134	CT0
30.1244	-0.356139	CT0
30.1336	-0.356145	CT0
30.1412	-0.356152	CT0
30.1495	-0.356167	CT0
30.1583	-0.356186	CT0
30.1665	-0.356192	CT0
30.1745	-0.356197	CT0
30.183	-0.356202	CT0
30.1919	-0.356205	CT0
30.2003	-0.356208	CT0
30.2087	-0.35621	CT0
30.2161	-0.356213	CT0
30.2252	-0.356216	CT0
30.2327	-0.356218	CT0
30.241	-0.356221	CT0
30.2495	-0.356225	CT0
30.2577	-0.356229	CT0
30.2662	-0.356233	CT0
30.2744	-0.356238	CT0
30.2833	-0.356241	CT0
30.2922	-0.356246	CT0
30.3003	-0.35625	CT0
30.3077	-0.356254	CT0
30.3166	-0.356258	CT0
30.3252	-0.356261	CT0
30.3332	-0.356265	CT0
30.3416	-0.356269	CT0
30.3496	-0.356272	CT0
30.3581	-0.356274	CT0
30.3676	-0.356276	CT0
30.3749	-0.356279	CT0
30.383	-0.356281	CT0
30.3919	-0.356283	CT0
30.4002	-0.356285	CT0
30.4088	-0.356288	CT0
30.4175	-0.356291	CT0
30.4244	-0.356295	CT0
30.433	-0.356301	CT0
30.4414	-0.356306	CT0
30.4502	-0.356309	CT0
30.4584	-0.356312	CT0
30.4669	-0.356315	CT0
30.4751	-0.356318	CT0
30.4839	-0.356321	CT0
30.4908	-0.356324	CT0
30.5005	-0.356328	CT0
30.5079	-0.356332	CT0
30.5167	-0.356335	CT0
30.5253	-0.356339	CT0
30.533	-0.356342	CT0
30.5411	-0.356346	CT0
30.5498	-0.35635	CT0
30.5588	-0.356353	CT0
30.5669	-0.356356	CT0
30.5751	-0.35636	CT0
30.583	-0.356365	CT0
30.5916	-0.356375	CT0
30.5997	-0.356388	CT0
30.6087	-0.356399	CT0
30.6159	-0.356419	CT0
30.6247	-0.356433	CT0
30.6334	-0.35644	CT0
30.6419	-0.356444	CT0
30.6509	-0.356449	CT0
30.6582	-0.356451	CT0
30.6664	-0.356453	CT0
30.6744	-0.356455	CT0
30.6834	-0.356459	CT0
30.691	-0.356462	CT0
30.7002	-0.356466	CT0
30.7082	-0.356472	CT0
30.7172	-0.356477	CT0
30.7258	-0.356482	CT0
30.7334	-0.356488	CT0
30.7422	-0.356493	CT0
30.7508	-0.356497	CT0
30.7591	-0.3565	CT0
30.7673	-0.356503	CT0
30.7758	-0.356507	CT0
30.783	-0.356509	CT0
30.7924	-0.356512	CT0
30.8001	-0.356514	CT0
30.8081	-0.356515	CT0
30.8169	-0.356515	CT0
30.8251	-0.356516	CT0
30.8337	-0.356518	CT0
30.8424	-0.35652	CT0
30.8498	-0.356524	CT0
30.8596	-0.356528	CT0
30.8673	-0.356533	CT0
30.8751	-0.356538	CT0
30.8839	-0.356544	CT0
30.892	-0.356549	CT0
30.9005	-0.356553	CT0
30.9084	-0.356556	CT0
30.9163	-0.356559	CT0
30.9244	-0.356563	CT0
30.9324	-0.356567	CT0
30.9415	-0.35657	CT0
30.9501	-0.356575	CT0
30.9588	-0.35658	CT0
30.9675	-0.356585	CT0
30.9755	-0.35659	CT0
30.9833	-0.356593	CT0
30.9918	-0.356597	CT0
31	-0.356601	CT0
31.0083	-0.356606	CT0
31.017	-0.35661	CT0
31.0243	-0.356615	CT0
31.034	-0.356619	CT0
31.0417	-0.356623	CT0
31.0503	-0.356627	CT0
31.0589	-0.35663	CT0
31.0672	-0.356633	CT0
31.0738	-0.356636	CT0
31.0838	-0.356639	CT0
31.0912	-0.356642	CT0
31.0995	-0.356644	CT0
31.1073	-0.356647	CT0
31.1162	-0.356651	CT0
31.1247	-0.356655	CT0
31.1333	-0.356657	CT0
31.1409	-0.356658	CT0
31.1503	-0.356659	CT0
31.1588	-0.35666	CT0
31.1665	-0.356661	CT0
31.1758	-0.356662	CT0
31.1835	-0.356664	CT0
31.1925	-0.356665	CT0
31.2007	-0.356668	CT0
31.2091	-0.35667	CT0
31.2171	-0.356674	CT0
31.2253	-0.356677	CT0
31.2337	-0.356679	CT0
31.242	-0.356681	CT0
31.2508	-0.356683	CT0
31.2589	-0.356685	CT0
31.2672	-0.356688	CT0
31.2758	-0.356691	CT0
31.2828	-0.356695	CT0
31.2914	-0.356698	CT0
31.2996	-0.356701	CT0
31.3087	-0.356704	CT0
31.3162	-0.356706	CT0
31.3251	-0.356709	CT0
31.3331	-0.356712	CT0
31.3416	-0.356714	CT0
31.3504	-0.356715	CT0
31.359	-0.356716	CT0
31.368	-0.356717	CT0
31.376	-0.356719	CT0
31.3837	-0.356721	CT0
31.3929	-0.356724	CT0
31.4003	-0.356727	CT0
31.4081	-0.356728	CT0
31.4176	-0.356731	CT0
31.4255	-0.356733	CT0
31.4333	-0.356734	CT0
31.4414	-0.356735	CT0
31.4505	-0.356735	CT0
31.4589	-0.356734	CT0
31.467	-0.356734	CT0
31.4754	-0.356735	CT0
31.4843	-0.356737	CT0
31.4927	-0.35674	CT0
31.5004	-0.356745	CT0
31.5087	-0.356749	CT0
31.5164	-0.356753	CT0
31.5256	-0.356757	CT0
31.5341	-0.356761	CT0
31.5416	-0.356764	CT0
31.5505	-0.356766	CT0
31.5584	-0.356768	CT0
31.5662	-0.35677	CT0
31.5743	-0.356772	CT0
31.5833	-0.356774	CT0
31.5916	-0.356776	CT0
31.6001	-0.356778	CT0
31.6082	-0.356779	CT0
31.6173	-0.356781	CT0
31.6251	-0.356782	CT0
31.6336	-0.356782	CT0
31.6414	-0.356783	CT0
31.6503	-0.356783	CT0
31.6594	-0.356784	CT0
31.6667	-0.356784	CT0
31.6761	-0.356786	CT0
31.6835	-0.356788	CT0
31.6907	-0.356791	CT0
31.7008	-0.356793	CT0
31.7092	-0.356796	CT0
31.7166	-0.356798	CT0
31.7249	-0.3568	CT0
31.7331	-0.356801	CT0
31.7417	-0.356803	CT0
31.7502	-0.356805	CT0
31.7593	-0.356807	CT0
31.7679	-0.35681	CT0
31.7752	-0.356813	CT0
31.7841	-0.356816	CT0
31.7919	-0.356819	CT0
31.7999	-0.356822	CT0
31.8083	-0.356824	CT0
31.8158	-0.356825	CT0
31.824	-0.356826	CT0
31.8333	-0.356826	CT0
31.8411	-0.356827	CT0
31.8498	-0.356828	CT0
31.8585	-0.35683	CT0
31.867	-0.356831	CT0
31.8748	-0.356833	CT0
31.8839	-0.356835	CT0
31.8929	-0.356837	CT0
31.9005	-0.356839	CT0
31.9099	-0.356842	CT0
31.9171	-0.356844	CT0
31.9263	-0.356847	CT0
31.9342	-0.35685	CT0
31.9422	-0.356853	CT0
31.9507	-0.356856	CT0
31.9589	-0.35686	CT0
31.9666	-0.356863	CT0
31.9741	-0.356866	CT0
31.9826	-0.356869	CT0
31.9913	-0.356872	CT0
31.9996	-0.356874	CT0
32.0075	-0.356876	CT0
32.0163	-0.356878	CT0
32.025	-0.356879	CT0
32.0332	-0.356881	CT0
32.0412	-0.356882	CT0
32.0493	-0.356884	CT0
32.0586	-0.356886	CT0
32.0659	-0.356889	CT0
32.0742	-0.356891	CT0
32.083	-0.356895	CT0
32.0922	-0.356898	CT0
32.1002	-0.3569	CT0
32.1086	-0.356905	CT0
32.1165	-0.356908	CT0
32.1254	-0.356911	CT0
32.1335	-0.356913	CT0
32.142	-0.356915	CT0
32.1502	-0.356917	CT0
32.1583	-0.35692	CT0
32.1667	-0.356924	CT0
32.1752	-0.356927	CT0
32.183	-0.356929	CT0
32.1919	-0.356931	CT0
32.2001	-0.356934	CT0
32.209	-0.356937	CT0
32.217	-0.35694	CT0
32.2253	-0.356943	CT0
32.233	-0.356946	CT0
32.2415	-0.35695	CT0
32.2507	-0.356955	CT0
32.2588	-0.35696	CT0
32.2664	-0.356963	CT0
32.2751	-0.356965	CT0
32.283	-0.356967	CT0
32.2913	-0.356968	CT0
32.2993	-0.35697	CT0
32.3085	-0.356972	CT0
32.3164	-0.356974	CT0
32.3237	-0.356977	CT0
32.3328	-0.356981	CT0
32.3419	-0.35699	CT0
32.3504	-0.357003	CT0
32.3591	-0.357008	CT0
32.367	-0.357014	CT0
32.3752	-0.357019	CT0
32.3831	-0.357023	CT0
32.391	-0.357025	CT0
32.4005	-0.357029	CT0
32.4084	-0.357032	CT0
32.4171	-0.357035	CT0
32.4244	-0.357038	CT0
32.4335	-0.357042	CT0
32.4413	-0.357045	CT0
32.45	-0.357047	CT0
32.4593	-0.35705	CT0
32.4665	-0.357054	CT0
32.4756	-0.357057	CT0
32.484	-0.357059	CT0
32.4922	-0.357061	CT0
32.5001	-0.357063	CT0
32.5095	-0.357065	CT0
32.5167	-0.357067	CT0
32.5256	-0.357071	CT0
32.5336	-0.357074	CT0
32.5428	-0.357076	CT0
32.5503	-0.357079	CT0
32.5589	-0.357082	CT0
32.5674	-0.357085	CT0
32.5753	-0.357088	CT0
32.5838	-0.357091	CT0
32.5927	-0.357093	CT0
32.6002	-0.357095	CT0
32.6089	-0.357097	CT0
32.6166	-0.3571	CT0
32.6254	-0.357102	CT0
32.6344	-0.357104	CT0
32.6418	-0.357106	CT0
32.6503	-0.357108	CT0
32.6591	-0.35711	CT0
32.6671	-0.357113	CT0
32.6749	-0.357116	CT0
32.6842	-0.357119	CT0
32.6926	-0.357122	CT0
32.7006	-0.357125	CT0
32.7093	-0.357129	CT0
32.7168	-0.357132	CT0
32.7261	-0.357136	CT0
32.7337	-0.357139	CT0
32.7423	-0.357143	CT0
32.7503	-0.357145	CT0
32.7584	-0.357146	CT0
32.767	-0.357148	CT0
32.7754	-0.357151	CT0
32.7837	-0.357154	CT0
32.7924	-0.357156	CT0
32.8002	-0.357158	CT0
32.8081	-0.357159	CT0
32.8174	-0.357161	CT0
32.8264	-0.357163	CT0
32.834	-0.357164	CT0
32.8429	-0.357164	CT0
32.8506	-0.357164	CT0
32.8581	-0.357165	CT0
32.8684	-0.357168	CT0
32.8749	-0.357171	CT0
32.8832	-0.357175	CT0
32.892	-0.357178	CT0
32.9003	-0.357182	CT0
32.9076	-0.357186	CT0
32.9168	-0.357189	CT0
32.9251	-0.357192	CT0
32.9331	-0.357195	CT0
32.9409	-0.357195	CT0
32.9505	-0.357196	CT0
32.9583	-0.357198	CT0
32.9662	-0.357199	CT0
32.9757	-0.357201	CT0
32.9839	-0.357203	CT0
32.9912	-0.357205	CT0
33.0003	-0.357207	CT0
33.008	-0.357208	CT0
33.0162	-0.357209	CT0
33.0246	-0.35721	CT0
33.0338	-0.35721	CT0
33.0421	-0.357211	CT0
33.0506	-0.357211	CT0
33.0586	-0.357211	CT0
33.0665	-0.357213	CT0
33.0753	-0.357216	CT0
33.0833	-0.357219	CT0
33.0912	-0.357223	CT0
33.1	-0.357227	CT0
33.1083	-0.35723	CT0
33.1169	-0.357232	CT0
33.125	-0.357234	CT0
33.1335	-0.357236	CT0
33.1414	-0.357237	CT0
33.1503	-0.357238	CT0
33.1587	-0.357237	CT0
33.1667	-0.357238	CT0
33.1748	-0.35724	CT0
33.1829	-0.357242	CT0
33.1911	-0.357244	CT0
33.2003	-0.357246	CT0
33.2082	-0.357247	CT0
33.216	-0.357247	CT0
33.225	-0.357248	CT0
33.2328	-0.357249	CT0
33.2418	-0.35725	CT0
33.2496	-0.35725	CT0
33.2582	-0.357251	CT0
33.267	-0.357254	CT0
33.2757	-0.357256	CT0
33.2838	-0.357258	CT0
33.293	-0.35726	CT0
33.3011	-0.357262	CT0
33.3093	-0.357263	CT0
33.3167	-0.357264	CT0
33.3246	-0.357266	CT0
33.3332	-0.357268	CT0
33.3422	-0.35727	CT0
33.3499	-0.357272	CT0
33.3588	-0.357276	CT0
33.3663	-0.357281	CT0
33.3753	-0.357287	CT0
33.3836	-0.357292	CT0
33.3925	-0.357296	CT0
33.4012	-0.357297	CT0
33.409	-0.357299	CT0
33.4171	-0.357301	CT0
33.4252	-0.357303	CT0
33.4331	-0.357304	CT0
33.4413	-0.357303	CT0
33.45	-0.357303	CT0
33.4586	-0.357304	CT0
33.4671	-0.357305	CT0
33.4747	-0.357306	CT0
33.4833	-0.357307	CT0
33.4923	-0.357307	CT0
33.5008	-0.357309	CT0
33.5085	-0.357311	CT0
33.5172	-0.357314	CT0
33.5258	-0.357317	CT0
33.533	-0.35732	CT0
33.5427	-0.357322	CT0
33.5499	-0.357325	CT0
33.5587	-0.357329	CT0
33.5675	-0.357332	CT0
33.5748	-0.357335	CT0
33.5839	-0.357337	CT0
33.592	-0.357339	CT0
33.6004	-0.357342	CT0
33.6091	-0.357344	CT0
33.6164	-0.357345	CT0
33.6255	-0.357344	CT0
33.6338	-0.357344	CT0
33.6428	-0.357346	CT0
33.6504	-0.357348	CT0
33.6581	-0.357349	CT0
33.6678	-0.357351	CT0
33.6759	-0.357353	CT0
33.6836	-0.357357	CT0
33.6929	-0.357363	CT0
33.7008	-0.357367	CT0
33.7087	-0.357371	CT0
33.7166	-0.357374	CT0
33.7254	-0.357378	CT0
33.7329	-0.357383	CT0
33.7419	-0.357386	CT0
33.7503	-0.357389	CT0
33.7593	-0.357392	CT0
33.7671	-0.357395	CT0
33.7754	-0.357397	CT0
33.7845	-0.357399	CT0
33.7925	-0.357399	CT0
33.8016	-0.3574	CT0
33.8087	-0.3574	CT0
33.8182	-0.3574	CT0
33.8264	-0.357399	CT0
33.8344	-0.357399	CT0
33.8425	-0.3574	CT0
33.8503	-0.357401	CT0
33.8594	-0.357403	CT0
33.868	-0.357405	CT0
33.876	-0.357408	CT0
33.8837	-0.357411	CT0
33.892	-0.357414	CT0
33.9003	-0.357418	CT0
33.9085	-0.357423	CT0
33.9175	-0.357427	CT0
33.926	-0.357431	CT0
33.9349	-0.357434	CT0
33.9426	-0.357437	CT0
33.9511	-0.357439	CT0
33.959	-0.357442	CT0
33.9682	-0.357445	CT0
33.976	-0.357447	CT0
33.9843	-0.35745	CT0
33.9922	-0.357453	CT0
34.0008	-0.357456	CT0
34.0096	-0.357458	CT0
34.0177	-0.357459	CT0
34.0257	-0.357459	CT0
34.0346	-0.357457	CT0
34.0432	-0.357455	CT0
34.0508	-0.357453	CT0
34.0594	-0.357453	CT0
34.0677	-0.357454	CT0
34.0765	-0.357455	CT0
34.0841	-0.357458	CT0
34.092	-0.35746	CT0
34.0998	-0.357463	CT0
34.1091	-0.357466	CT0
34.1175	-0.357468	CT0
34.1252	-0.357469	CT0
34.1336	-0.357471	CT0
34.1423	-0.357473	CT0
34.1512	-0.357475	CT0
34.1597	-0.357478	CT0
34.1686	-0.357481	CT0
34.1764	-0.357486	CT0
34.1846	-0.357492	CT0
34.1938	-0.357496	CT0
34.2009	-0.357499	CT0
34.2087	-0.3575	CT0
34.2186	-0.357502	CT0
34.2267	-0.357501	CT0
34.2348	-0.357501	CT0
34.2421	-0.3575	CT0
34.2509	-0.357499	CT0
34.2595	-0.357499	CT0
34.2669	-0.357499	CT0
34.2762	-0.357499	CT0
34.2848	-0.357502	CT0
34.293	-0.357505	CT0
34.3014	-0.357508	CT0
34.3095	-0.357512	CT0
34.317	-0.357514	CT0
34.326	-0.357517	CT0
34.3346	-0.357518	CT0
34.3419	-0.35752	CT0
34.3516	-0.357521	CT0
34.3595	-0.357522	CT0
34.3679	-0.357523	CT0
34.3757	-0.357524	CT0
34.384	-0.357525	CT0
34.3932	-0.357527	CT0
34.4013	-0.357529	CT0
34.4091	-0.357531	CT0
34.4173	-0.357533	CT0
34.4259	-0.357534	CT0
34.4346	-0.357535	CT0
34.4425	-0.357537	CT0
34.4513	-0.35754	CT0
34.4591	-0.357543	CT0
34.4674	-0.357546	CT0
34.4761	-0.357548	CT0
34.4844	-0.357551	CT0
34.4933	-0.357553	CT0
34.5005	-0.357553	CT0
34.5095	-0.357554	CT0
34.5174	-0.357555	CT0
34.5263	-0.357556	CT0
34.5331	-0.357558	CT0
34.5421	-0.35756	CT0
34.5509	-0.357562	CT0
34.5598	-0.357564	CT0
34.568	-0.357566	CT0
34.5755	-0.357568	CT0
34.5844	-0.357569	CT0
34.5933	-0.357569	CT0
34.6005	-0.357569	CT0
34.6094	-0.35757	CT0
34.6187	-0.35757	CT0
34.6253	-0.357571	CT0
34.6344	-0.357573	CT0
34.6422	-0.357575	CT0
34.651	-0.357577	CT0
34.6598	-0.357578	CT0
34.6685	-0.357581	CT0
34.6766	-0.357582	CT0
34.6835	-0.357584	CT0
34.6927	-0.357585	CT0
34.7007	-0.357586	CT0
34.7098	-0.357587	CT0
34.7172	-0.357587	CT0
34.7262	-0.357588	CT0
34.7353	-0.357589	CT0
34.7426	-0.357589	CT0
34.7519	-0.35759	CT0
34.7592	-0.35759	CT0
34.7671	-0.357591	CT0
34.7759	-0.357591	CT0
34.784	-0.357591	CT0
34.793	-0.357592	CT0
34.8016	-0.357592	CT0
34.8094	-0.357594	CT0
34.8178	-0.357595	CT0
34.8268	-0.357597	CT0
34.8338	-0.3576	CT0
34.8433	-0.357603	CT0
34.8519	-0.357604	CT0
34.8597	-0.357606	CT0
34.8683	-0.357607	CT0
34.8768	-0.357608	CT0
34.8849	-0.357609	CT0
34.8927	-0.357609	CT0
34.9017	-0.35761	CT0
34.9101	-0.357611	CT0
34.9184	-0.357612	CT0
34.9275	-0.357614	CT0
34.9344	-0.357615	CT0
34.943	-0.357617	CT0
34.9522	-0.357619	CT0
34.9597	-0.357621	CT0
34.9679	-0.357623	CT0
34.9773	-0.357626	CT0
34.9851	-0.357627	CT0
34.9944	-0.357629	CT0
35.0015	-0.357629	CT0
35.0095	-0.35763	CT0
35.0186	-0.35763	CT0
35.0269	-0.35763	CT0
35.0347	-0.35763	CT0
35.0431	-0.35763	CT0
35.052	-0.357631	CT0
35.0599	-0.357632	CT0
35.0684	-0.357633	CT0
35.0765	-0.357634	CT0
35.0855	-0.357635	CT0
35.0937	-0.357636	CT0
35.1016	-0.357637	CT0
35.1099	-0.357639	CT0
35.1187	-0.35764	CT0
35.1268	-0.357642	CT0
35.1346	-0.357645	CT0
35.1431	-0.357659	CT0
35.1511	-0.357669	CT0
35.1602	-0.357673	CT0
35.1683	-0.357677	CT0
35.1775	-0.357678	CT0
[truncated: 22,003 more rows]

## Sheet: CAHS D_Sucrose
Temperature	Heat Flow (Normalized)	Sample
20.0229	-0.0143623	CS0
20.0237	-0.014363	CS0
20.0231	-0.0143639	CS0
20.0238	-0.0143647	CS0
20.0247	-0.014365	CS0
20.0239	-0.0143652	CS0
20.0233	-0.0143657	CS0
20.024	-0.0143657	CS0
20.0241	-0.0143657	CS0
20.0244	-0.0143665	CS0
20.0239	-0.0143674	CS0
20.0238	-0.0143686	CS0
20.0245	-0.0143697	CS0
20.0253	-0.014371	CS0
20.025	-0.0143727	CS0
20.0248	-0.0143742	CS0
20.0254	-0.0143757	CS0
20.0241	-0.0143771	CS0
20.0253	-0.0143782	CS0
20.0247	-0.0143789	CS0
20.0254	-0.0143801	CS0
20.0251	-0.0143812	CS0
20.0258	-0.0143828	CS0
20.0263	-0.0143844	CS0
20.0265	-0.0143864	CS0
20.0262	-0.0143883	CS0
20.0261	-0.0143906	CS0
20.0272	-0.0143933	CS0
20.0274	-0.0143964	CS0
20.0275	-0.0144038	CS0
20.0283	-0.0144177	CS0
20.029	-0.0144364	CS0
20.0295	-0.014464	CS0
20.0293	-0.0145069	CS0
20.0291	-0.0145732	CS0
20.0295	-0.0146782	CS0
20.0296	-0.014822	CS0
20.0307	-0.0149984	CS0
20.0306	-0.0152192	CS0
20.032	-0.0154907	CS0
20.0305	-0.0158094	CS0
20.0334	-0.0161581	CS0
20.0333	-0.0165568	CS0
20.0343	-0.0170115	CS0
20.0347	-0.0175645	CS0
20.0357	-0.0180856	CS0
20.0374	-0.0185879	CS0
20.0364	-0.0191194	CS0
20.0375	-0.0196069	CS0
20.0391	-0.0200551	CS0
20.0404	-0.0205728	CS0
20.0411	-0.0210911	CS0
20.0417	-0.0215856	CS0
20.043	-0.0221223	CS0
20.0435	-0.0226794	CS0
20.0447	-0.023207	CS0
20.0465	-0.0238687	CS0
20.0469	-0.0244969	CS0
20.0487	-0.0252035	CS0
20.0496	-0.0259335	CS0
20.0515	-0.0267243	CS0
20.0529	-0.0275643	CS0
20.0535	-0.0284573	CS0
20.0544	-0.02932	CS0
20.0555	-0.0301371	CS0
20.0578	-0.0309854	CS0
20.0597	-0.0319045	CS0
20.0607	-0.0329228	CS0
20.0622	-0.0338145	CS0
20.0649	-0.0347953	CS0
20.0665	-0.0357444	CS0
20.068	-0.0367546	CS0
20.0698	-0.0378408	CS0
20.0718	-0.0390046	CS0
20.0735	-0.0402149	CS0
20.0744	-0.0414785	CS0
20.0767	-0.0426985	CS0
20.0795	-0.0439786	CS0
20.0811	-0.0452503	CS0
20.0844	-0.0465414	CS0
20.0863	-0.0478333	CS0
20.0885	-0.0491708	CS0
20.0909	-0.0504116	CS0
20.0935	-0.0517022	CS0
20.0952	-0.053084	CS0
20.0981	-0.0544796	CS0
20.1009	-0.0559623	CS0
20.1027	-0.057447	CS0
20.1047	-0.0588997	CS0
20.1069	-0.0604258	CS0
20.1097	-0.0619304	CS0
20.1126	-0.0634603	CS0
20.115	-0.064976	CS0
20.1187	-0.0664047	CS0
20.1205	-0.0680196	CS0
20.1243	-0.0696759	CS0
20.1276	-0.0712694	CS0
20.1298	-0.0729232	CS0
20.1325	-0.0746554	CS0
20.1367	-0.076363	CS0
20.1391	-0.077986	CS0
20.1431	-0.0796829	CS0
20.1448	-0.0812901	CS0
20.1493	-0.0828522	CS0
20.1516	-0.084386	CS0
20.1545	-0.0860539	CS0
20.1582	-0.0877533	CS0
20.1608	-0.089352	CS0
20.1642	-0.0909686	CS0
20.1682	-0.0927488	CS0
20.1712	-0.0944539	CS0
20.1748	-0.0961506	CS0
20.1786	-0.0979361	CS0
20.1818	-0.0996635	CS0
20.1865	-0.101367	CS0
20.1889	-0.102994	CS0
20.1928	-0.104667	CS0
20.1973	-0.106266	CS0
20.1995	-0.107901	CS0
20.2048	-0.109537	CS0
20.2089	-0.111235	CS0
20.2129	-0.112908	CS0
20.216	-0.114519	CS0
20.2206	-0.116296	CS0
20.2239	-0.11796	CS0
20.2276	-0.119639	CS0
20.2309	-0.121321	CS0
20.235	-0.123002	CS0
20.2402	-0.124553	CS0
20.2446	-0.126177	CS0
20.2485	-0.127733	CS0
20.2532	-0.129293	CS0
20.2568	-0.130892	CS0
20.2613	-0.132454	CS0
20.2664	-0.134081	CS0
20.2692	-0.135746	CS0
20.2736	-0.137358	CS0
20.2782	-0.138986	CS0
20.2826	-0.140618	CS0
20.2874	-0.142074	CS0
20.2921	-0.143556	CS0
20.2954	-0.144988	CS0
20.3009	-0.146423	CS0
20.3051	-0.147899	CS0
20.3092	-0.149421	CS0
20.3131	-0.150988	CS0
20.3184	-0.152533	CS0
20.3223	-0.154057	CS0
20.3286	-0.155432	CS0
20.3326	-0.156981	CS0
20.3376	-0.158309	CS0
20.3427	-0.159743	CS0
20.3474	-0.161065	CS0
20.3527	-0.162504	CS0
20.356	-0.163785	CS0
20.3612	-0.165075	CS0
20.3655	-0.166621	CS0
20.37	-0.168089	CS0
20.3758	-0.169489	CS0
20.3802	-0.170749	CS0
20.385	-0.172138	CS0
20.3909	-0.173418	CS0
20.3952	-0.174748	CS0
20.3996	-0.176069	CS0
20.4064	-0.177408	CS0
20.41	-0.178564	CS0
20.4159	-0.179763	CS0
20.4202	-0.180963	CS0
20.4259	-0.182167	CS0
20.4313	-0.183421	CS0
20.4359	-0.184744	CS0
20.4411	-0.186016	CS0
20.4465	-0.187287	CS0
20.4515	-0.188596	CS0
20.4568	-0.189874	CS0
20.4624	-0.191173	CS0
20.4671	-0.192409	CS0
20.4718	-0.193645	CS0
20.4771	-0.194863	CS0
20.4832	-0.195933	CS0
20.488	-0.196938	CS0
20.493	-0.19831	CS0
20.4995	-0.199484	CS0
20.5049	-0.200531	CS0
20.5102	-0.201625	CS0
20.5153	-0.202681	CS0
20.522	-0.203756	CS0
20.527	-0.204854	CS0
20.5328	-0.205886	CS0
20.5385	-0.207011	CS0
20.544	-0.207924	CS0
20.5497	-0.208959	CS0
20.556	-0.210123	CS0
20.56	-0.211154	CS0
20.566	-0.212267	CS0
20.5708	-0.21322	CS0
20.5766	-0.214188	CS0
20.5819	-0.215125	CS0
20.5883	-0.216139	CS0
20.5937	-0.217214	CS0
20.6002	-0.218211	CS0
20.6054	-0.219251	CS0
20.6113	-0.220274	CS0
20.6174	-0.221287	CS0
20.6233	-0.222356	CS0
20.6291	-0.223407	CS0
20.6342	-0.224381	CS0
20.6408	-0.225255	CS0
20.6469	-0.226022	CS0
20.653	-0.226893	CS0
20.6583	-0.227812	CS0
20.6647	-0.228723	CS0
20.6696	-0.229683	CS0
20.6759	-0.230549	CS0
20.682	-0.231499	CS0
20.6882	-0.232444	CS0
20.6939	-0.23327	CS0
20.6997	-0.234333	CS0
20.7064	-0.235268	CS0
20.7117	-0.236026	CS0
20.718	-0.23691	CS0
20.7251	-0.2378	CS0
20.7299	-0.238558	CS0
20.7366	-0.239486	CS0
20.7426	-0.240242	CS0
20.7485	-0.241131	CS0
20.7557	-0.241945	CS0
20.7613	-0.24272	CS0
20.7672	-0.243525	CS0
20.7742	-0.244321	CS0
20.7804	-0.24513	CS0
20.7866	-0.245785	CS0
20.7919	-0.2466	CS0
20.7986	-0.247373	CS0
20.8045	-0.248165	CS0
20.8098	-0.249024	CS0
20.8155	-0.249851	CS0
20.8229	-0.250658	CS0
20.8295	-0.251415	CS0
20.8354	-0.252216	CS0
20.8418	-0.252955	CS0
20.8478	-0.25375	CS0
20.8549	-0.254286	CS0
20.8611	-0.255039	CS0
20.8687	-0.255845	CS0
20.8735	-0.256602	CS0
20.88	-0.257469	CS0
20.8867	-0.258215	CS0
20.8932	-0.258983	CS0
20.8997	-0.259706	CS0
20.9061	-0.2604	CS0
20.9119	-0.261111	CS0
20.9191	-0.261715	CS0
20.9252	-0.262254	CS0
20.9329	-0.262884	CS0
20.9394	-0.263456	CS0
20.9458	-0.264124	CS0
20.9523	-0.264901	CS0
20.9589	-0.265452	CS0
20.9652	-0.266107	CS0
20.9709	-0.2668	CS0
20.9779	-0.267473	CS0
20.9847	-0.26814	CS0
20.9915	-0.268764	CS0
20.998	-0.269264	CS0
21.0043	-0.269903	CS0
21.0104	-0.270529	CS0
21.0175	-0.271242	CS0
21.0241	-0.271901	CS0
21.0314	-0.272483	CS0
21.0382	-0.273077	CS0
21.044	-0.273697	CS0
21.0508	-0.274244	CS0
21.059	-0.27499	CS0
21.0645	-0.275707	CS0
21.0719	-0.276354	CS0
21.0782	-0.276994	CS0
21.0855	-0.277547	CS0
21.0926	-0.278105	CS0
21.0992	-0.278671	CS0
21.1052	-0.279152	CS0
21.1126	-0.279612	CS0
21.1191	-0.280117	CS0
21.1262	-0.280587	CS0
21.1327	-0.281169	CS0
21.1397	-0.281795	CS0
21.1463	-0.282481	CS0
21.153	-0.283155	CS0
21.1594	-0.283736	CS0
21.1674	-0.28428	CS0
21.1731	-0.284791	CS0
21.1814	-0.285179	CS0
21.1877	-0.285548	CS0
21.1949	-0.286028	CS0
21.2024	-0.286458	CS0
21.2083	-0.286867	CS0
21.2147	-0.287394	CS0
21.2221	-0.287915	CS0
21.2289	-0.288516	CS0
21.2369	-0.289069	CS0
21.2434	-0.28968	CS0
21.2517	-0.290202	CS0
21.2575	-0.2907	CS0
21.2643	-0.291092	CS0
21.2726	-0.291539	CS0
21.2792	-0.29205	CS0
21.286	-0.292413	CS0
21.2929	-0.292897	CS0
21.2999	-0.293369	CS0
21.3065	-0.293946	CS0
21.3131	-0.294411	CS0
21.3202	-0.294956	CS0
21.3289	-0.295411	CS0
21.3343	-0.295798	CS0
21.342	-0.296207	CS0
21.3496	-0.296655	CS0
21.3553	-0.2971	CS0
21.363	-0.297476	CS0
21.3702	-0.298001	CS0
21.3774	-0.298455	CS0
21.3846	-0.298895	CS0
21.3912	-0.29929	CS0
21.3991	-0.299724	CS0
21.4067	-0.30027	CS0
21.4136	-0.30078	CS0
21.4211	-0.301117	CS0
21.4281	-0.301514	CS0
21.4351	-0.301935	CS0
21.4422	-0.302232	CS0
21.4492	-0.302656	CS0
21.455	-0.303017	CS0
21.4623	-0.303378	CS0
21.4705	-0.303774	CS0
21.4768	-0.304166	CS0
21.4847	-0.304524	CS0
21.4922	-0.304967	CS0
21.4996	-0.305462	CS0
21.5071	-0.305941	CS0
21.5146	-0.306259	CS0
21.5209	-0.306454	CS0
21.5281	-0.306779	CS0
21.5365	-0.307082	CS0
21.5438	-0.3074	CS0
21.5503	-0.307918	CS0
21.5577	-0.30821	CS0
21.5656	-0.308621	CS0
21.5727	-0.309045	CS0
21.5802	-0.309488	CS0
21.5865	-0.309924	CS0
21.5948	-0.310374	CS0
21.6014	-0.310657	CS0
21.6088	-0.310965	CS0
21.616	-0.311232	CS0
21.624	-0.311422	CS0
21.6315	-0.311882	CS0
21.6387	-0.312226	CS0
21.6461	-0.312575	CS0
21.6537	-0.312947	CS0
21.6612	-0.313335	CS0
21.6679	-0.313644	CS0
21.6753	-0.314016	CS0
21.6823	-0.314362	CS0
21.6905	-0.314618	CS0
21.6969	-0.314885	CS0
21.7055	-0.315142	CS0
21.7122	-0.315448	CS0
21.7192	-0.315768	CS0
21.7271	-0.316108	CS0
21.7351	-0.316449	CS0
21.7418	-0.316828	CS0
21.7503	-0.317083	CS0
21.7567	-0.317416	CS0
21.7651	-0.317748	CS0
21.7724	-0.317985	CS0
21.7789	-0.318274	CS0
21.7867	-0.318529	CS0
21.7952	-0.318786	CS0
21.8016	-0.319026	CS0
21.8092	-0.319348	CS0
21.8169	-0.319653	CS0
21.8248	-0.320051	CS0
21.832	-0.320398	CS0
21.8391	-0.320902	CS0
21.847	-0.321161	CS0
21.8552	-0.321498	CS0
21.8621	-0.321805	CS0
21.8708	-0.322037	CS0
21.8774	-0.322221	CS0
21.8853	-0.322481	CS0
21.8935	-0.322669	CS0
21.8995	-0.322887	CS0
21.9068	-0.323106	CS0
21.915	-0.32337	CS0
21.9228	-0.323697	CS0
21.9301	-0.323829	CS0
21.9383	-0.324143	CS0
21.9457	-0.32442	CS0
21.9536	-0.324754	CS0
21.9604	-0.325109	CS0
21.968	-0.325342	CS0
21.9754	-0.325601	CS0
21.9835	-0.325801	CS0
21.9909	-0.326018	CS0
21.9986	-0.326144	CS0
22.0061	-0.326375	CS0
22.0127	-0.326576	CS0
22.0211	-0.327015	CS0
22.0284	-0.327155	CS0
22.0369	-0.32741	CS0
22.0447	-0.327819	CS0
22.052	-0.328109	CS0
22.0598	-0.328435	CS0
22.0676	-0.32864	CS0
22.0754	-0.328834	CS0
22.0827	-0.32898	CS0
22.0898	-0.329162	CS0
22.0977	-0.329398	CS0
22.1066	-0.329591	CS0
22.1132	-0.329755	CS0
22.1213	-0.329912	CS0
22.1285	-0.330271	CS0
22.1367	-0.330412	CS0
22.1441	-0.33062	CS0
22.1521	-0.330686	CS0
22.1596	-0.33094	CS0
22.1666	-0.33112	CS0
22.1749	-0.331382	CS0
22.1826	-0.331649	CS0
22.1903	-0.331745	CS0
22.1988	-0.331955	CS0
22.2055	-0.332183	CS0
22.2134	-0.33236	CS0
22.2211	-0.332627	CS0
22.2289	-0.333041	CS0
22.2357	-0.33325	CS0
22.2453	-0.333419	CS0
22.2523	-0.333731	CS0
22.26	-0.334018	CS0
22.2673	-0.334212	CS0
22.2757	-0.334308	CS0
22.2832	-0.334495	CS0
22.2913	-0.334635	CS0
22.2993	-0.334668	CS0
22.3069	-0.334769	CS0
22.3136	-0.334913	CS0
22.3215	-0.335032	CS0
22.3289	-0.335183	CS0
22.3367	-0.335501	CS0
22.3442	-0.335766	CS0
22.3528	-0.336004	CS0
22.3603	-0.336196	CS0
22.3682	-0.336467	CS0
22.3764	-0.336598	CS0
22.3846	-0.336868	CS0
22.3922	-0.337012	CS0
22.3995	-0.337198	CS0
22.4073	-0.337163	CS0
22.4155	-0.337286	CS0
22.4236	-0.33756	CS0
22.4305	-0.337795	CS0
22.4387	-0.338021	CS0
22.4466	-0.338223	CS0
22.4549	-0.338248	CS0
22.4622	-0.338417	CS0
22.471	-0.338582	CS0
22.4776	-0.338731	CS0
22.4864	-0.338901	CS0
22.4939	-0.338905	CS0
22.5024	-0.33895	CS0
22.5093	-0.339168	CS0
22.5165	-0.339387	CS0
22.5247	-0.339628	CS0
22.5331	-0.339802	CS0
22.5404	-0.339866	CS0
22.5474	-0.340007	CS0
22.5567	-0.340161	CS0
22.5644	-0.340235	CS0
22.5719	-0.340379	CS0
22.58	-0.340483	CS0
22.5881	-0.340646	CS0
22.5952	-0.340889	CS0
22.6032	-0.341046	CS0
22.6115	-0.341267	CS0
22.6184	-0.341533	CS0
22.6269	-0.341679	CS0
22.6352	-0.34182	CS0
22.6428	-0.342068	CS0
22.6506	-0.342144	CS0
22.6591	-0.342235	CS0
22.6681	-0.34236	CS0
22.675	-0.342466	CS0
22.6827	-0.342585	CS0
22.6901	-0.342655	CS0
22.6977	-0.342731	CS0
22.7064	-0.342903	CS0
22.7142	-0.342971	CS0
22.7216	-0.342977	CS0
22.7293	-0.343052	CS0
22.7367	-0.34305	CS0
22.7448	-0.343122	CS0
22.7536	-0.343237	CS0
22.7608	-0.343428	CS0
22.7684	-0.343667	CS0
22.7765	-0.343868	CS0
22.7848	-0.344038	CS0
22.7932	-0.344311	CS0
22.8	-0.344484	CS0
22.8082	-0.3446	CS0
22.8174	-0.344732	CS0
22.8244	-0.344793	CS0
22.8327	-0.344851	CS0
22.8409	-0.344887	CS0
22.8486	-0.345044	CS0
22.8578	-0.345205	CS0
22.8645	-0.345356	CS0
22.8729	-0.345491	CS0
22.8809	-0.345694	CS0
22.8899	-0.345728	CS0
22.8973	-0.345772	CS0
22.9054	-0.345857	CS0
22.9125	-0.345989	CS0
22.9209	-0.346072	CS0
22.9287	-0.346106	CS0
22.9364	-0.346148	CS0
22.9448	-0.346177	CS0
22.9514	-0.346259	CS0
22.96	-0.346405	CS0
22.9677	-0.34665	CS0
22.976	-0.346775	CS0
22.9845	-0.347003	CS0
22.9933	-0.347248	CS0
23.0012	-0.347506	CS0
23.0083	-0.347662	CS0
23.0165	-0.347706	CS0
23.0241	-0.347704	CS0
23.0325	-0.347666	CS0
23.0403	-0.34768	CS0
23.0482	-0.347716	CS0
23.0561	-0.347802	CS0
23.0641	-0.347882	CS0
23.0727	-0.348001	CS0
23.0798	-0.348119	CS0
23.0884	-0.348213	CS0
23.0963	-0.348306	CS0
23.1041	-0.348349	CS0
23.1121	-0.34839	CS0
23.1204	-0.348437	CS0
23.1283	-0.348521	CS0
23.1363	-0.348687	CS0
23.144	-0.348915	CS0
23.1519	-0.349168	CS0
23.1605	-0.349353	CS0
23.168	-0.34957	CS0
23.1767	-0.349658	CS0
23.1843	-0.34972	CS0
23.1934	-0.34972	CS0
23.2004	-0.349748	CS0
23.2087	-0.349771	CS0
23.2173	-0.349778	CS0
23.2254	-0.349812	CS0
23.2326	-0.349834	CS0
23.2405	-0.349887	CS0
23.2491	-0.349937	CS0
23.257	-0.350053	CS0
23.2652	-0.350223	CS0
23.273	-0.350359	CS0
23.2818	-0.350509	CS0
23.2887	-0.350617	CS0
23.2977	-0.350718	CS0
23.3044	-0.350814	CS0
23.3138	-0.350904	CS0
23.3218	-0.350958	CS0
23.3297	-0.351031	CS0
23.3372	-0.35111	CS0
23.3463	-0.351224	CS0
23.3532	-0.351356	CS0
23.3614	-0.351547	CS0
23.3702	-0.351679	CS0
23.3791	-0.351738	CS0
23.3867	-0.351798	CS0
23.3937	-0.35185	CS0
23.4012	-0.351905	CS0
23.4098	-0.351937	CS0
23.4183	-0.351955	CS0
23.4265	-0.351983	CS0
23.435	-0.35202	CS0
23.4425	-0.352063	CS0
23.4507	-0.352146	CS0
23.4586	-0.352217	CS0
23.466	-0.352301	CS0
23.4741	-0.352399	CS0
23.4815	-0.352519	CS0
23.4904	-0.352663	CS0
23.4985	-0.352763	CS0
23.5057	-0.352822	CS0
23.5143	-0.352859	CS0
23.5239	-0.352892	CS0
23.5319	-0.352936	CS0
23.5397	-0.353009	CS0
23.5486	-0.353054	CS0
23.5551	-0.353094	CS0
23.5637	-0.353147	CS0
23.5711	-0.353191	CS0
23.5797	-0.353229	CS0
23.5872	-0.353285	CS0
23.5954	-0.353383	CS0
23.6047	-0.353488	CS0
23.6126	-0.353611	CS0
23.6209	-0.353736	CS0
23.6288	-0.353886	CS0
23.6365	-0.354027	CS0
23.6453	-0.354117	CS0
23.6526	-0.354217	CS0
23.6608	-0.354303	CS0
23.6685	-0.35435	CS0
23.6769	-0.354368	CS0
23.6853	-0.354382	CS0
23.693	-0.354406	CS0
23.7015	-0.354432	CS0
23.7086	-0.354465	CS0
23.7165	-0.354523	CS0
23.7251	-0.354595	CS0
23.7332	-0.354702	CS0
23.7412	-0.354856	CS0
23.7498	-0.355018	CS0
23.7582	-0.355134	CS0
23.7674	-0.355175	CS0
23.7752	-0.355203	CS0
23.7831	-0.355214	CS0
23.7917	-0.355226	CS0
23.7995	-0.355243	CS0
23.8078	-0.355275	CS0
23.8159	-0.355307	CS0
23.8246	-0.355354	CS0
23.8322	-0.355408	CS0
23.839	-0.355459	CS0
23.8479	-0.355521	CS0
23.8557	-0.355559	CS0
23.8636	-0.355596	CS0
23.8719	-0.355628	CS0
23.88	-0.355674	CS0
23.8871	-0.355707	CS0
23.8966	-0.355754	CS0
23.9052	-0.355804	CS0
23.9136	-0.355874	CS0
23.9216	-0.355946	CS0
23.9294	-0.355983	CS0
23.9376	-0.356016	CS0
23.9448	-0.356027	CS0
23.9538	-0.356038	CS0
23.9616	-0.35605	CS0
23.9693	-0.356081	CS0
23.9781	-0.356107	CS0
23.9861	-0.356135	CS0
23.9944	-0.356179	CS0
24.0023	-0.356275	CS0
24.0103	-0.356401	CS0
24.0182	-0.356516	CS0
24.0268	-0.356627	CS0
24.0353	-0.356729	CS0
24.0437	-0.356803	CS0
24.052	-0.356874	CS0
24.0606	-0.356941	CS0
24.0677	-0.356993	CS0
24.0768	-0.35704	CS0
24.084	-0.357082	CS0
24.0936	-0.357122	CS0
24.101	-0.357152	CS0
24.1086	-0.357186	CS0
24.1168	-0.357214	CS0
24.1246	-0.357246	CS0
24.1336	-0.357294	CS0
24.1416	-0.357348	CS0
24.1499	-0.357396	CS0
24.1576	-0.357428	CS0
24.1656	-0.357463	CS0
24.1741	-0.357505	CS0
24.1827	-0.357541	CS0
24.1895	-0.357589	CS0
24.1986	-0.357633	CS0
24.2054	-0.357668	CS0
24.2151	-0.357705	CS0
24.2224	-0.357761	CS0
24.2311	-0.357834	CS0
24.2395	-0.357884	CS0
24.2485	-0.357923	CS0
24.2568	-0.357968	CS0
24.2642	-0.358015	CS0
24.2726	-0.35806	CS0
24.2814	-0.358114	CS0
24.2889	-0.358177	CS0
24.2969	-0.358215	CS0
24.3054	-0.358254	CS0
24.3136	-0.358272	CS0
24.3216	-0.358283	CS0
24.3295	-0.35829	CS0
24.3374	-0.358294	CS0
24.3459	-0.358304	CS0
24.3531	-0.358307	CS0
24.3614	-0.358323	CS0
24.3708	-0.358351	CS0
24.3783	-0.358397	CS0
24.3863	-0.358455	CS0
24.3953	-0.358539	CS0
24.4024	-0.358617	CS0
24.4114	-0.358668	CS0
24.419	-0.358722	CS0
24.4283	-0.358771	CS0
24.4355	-0.358814	CS0
24.4441	-0.358844	CS0
24.4534	-0.358883	CS0
24.4604	-0.35892	CS0
24.4695	-0.358949	CS0
24.4776	-0.358988	CS0
24.4854	-0.359032	CS0
24.4941	-0.359074	CS0
24.5021	-0.359119	CS0
24.5094	-0.359159	CS0
24.5181	-0.359212	CS0
24.526	-0.359256	CS0
24.5347	-0.35929	CS0
24.5429	-0.359323	CS0
24.5504	-0.359341	CS0
24.559	-0.359356	CS0
24.5664	-0.359374	CS0
24.5738	-0.359392	CS0
24.583	-0.359407	CS0
24.5925	-0.359431	CS0
24.6007	-0.359461	CS0
24.6086	-0.359494	CS0
24.6171	-0.359529	CS0
24.6246	-0.359564	CS0
24.6335	-0.359597	CS0
24.6413	-0.359618	CS0
24.6496	-0.359634	CS0
24.6577	-0.359656	CS0
24.6669	-0.359695	CS0
24.6737	-0.359733	CS0
24.6824	-0.359758	CS0
24.6903	-0.359782	CS0
24.6978	-0.359798	CS0
24.7062	-0.359813	CS0
24.7145	-0.35984	CS0
24.7222	-0.359863	CS0
24.7315	-0.359879	CS0
24.7393	-0.359892	CS0
24.7481	-0.359903	CS0
24.7565	-0.359925	CS0
24.7641	-0.359964	CS0
24.7723	-0.359999	CS0
24.7817	-0.360041	CS0
24.7892	-0.360088	CS0
24.7961	-0.360124	CS0
24.8045	-0.36017	CS0
24.8131	-0.360207	CS0
24.8213	-0.360237	CS0
24.8308	-0.360257	CS0
24.8381	-0.360276	CS0
24.8464	-0.360289	CS0
24.8538	-0.360306	CS0
24.8632	-0.360329	CS0
24.8705	-0.36037	CS0
24.8792	-0.360429	CS0
24.8874	-0.360485	CS0
24.896	-0.360551	CS0
24.9039	-0.360606	CS0
24.912	-0.360641	CS0
24.9201	-0.360651	CS0
24.9287	-0.36068	CS0
24.9369	-0.360702	CS0
24.9448	-0.360719	CS0
24.9533	-0.360734	CS0
24.9615	-0.360742	CS0
24.9699	-0.360756	CS0
24.9785	-0.360783	CS0
24.9868	-0.36083	CS0
24.9953	-0.36088	CS0
25.0033	-0.360921	CS0
25.0115	-0.360937	CS0
25.0203	-0.360947	CS0
25.027	-0.360954	CS0
25.0358	-0.36096	CS0
25.0445	-0.360976	CS0
25.0533	-0.360991	CS0
25.0612	-0.361006	CS0
25.0688	-0.361044	CS0
25.077	-0.36109	CS0
25.0855	-0.361135	CS0
25.0936	-0.36118	CS0
25.1016	-0.361199	CS0
25.1105	-0.361214	CS0
25.1188	-0.361224	CS0
25.1266	-0.361234	CS0
25.1349	-0.361255	CS0
25.1432	-0.361279	CS0
25.152	-0.361287	CS0
25.1593	-0.361295	CS0
25.168	-0.361304	CS0
25.1755	-0.361316	CS0
25.1842	-0.361333	CS0
25.1924	-0.361347	CS0
25.2009	-0.361371	CS0
25.2091	-0.361406	CS0
25.2182	-0.36144	CS0
25.2254	-0.361475	CS0
25.2337	-0.361539	CS0
25.2425	-0.361594	CS0
25.2506	-0.361637	CS0
25.2582	-0.361675	CS0
25.2663	-0.361689	CS0
25.2747	-0.361698	CS0
25.283	-0.361705	CS0
25.2922	-0.361719	CS0
25.3	-0.361733	CS0
25.3089	-0.361739	CS0
25.316	-0.361761	CS0
25.3248	-0.361768	CS0
25.3332	-0.361776	CS0
25.3412	-0.361789	CS0
25.3491	-0.361801	CS0
25.3571	-0.361806	CS0
25.366	-0.361811	CS0
25.3742	-0.361819	CS0
25.3821	-0.361836	CS0
25.3911	-0.361855	CS0
25.3987	-0.361875	CS0
25.4072	-0.361907	CS0
25.4151	-0.36193	CS0
25.4231	-0.36195	CS0
25.4321	-0.361973	CS0
25.4394	-0.361993	CS0
25.4479	-0.362	CS0
25.4567	-0.36201	CS0
25.4662	-0.362017	CS0
25.4734	-0.36203	CS0
25.4817	-0.362043	CS0
25.4895	-0.362048	CS0
25.4978	-0.362059	CS0
25.5062	-0.36207	CS0
25.515	-0.362086	CS0
25.5232	-0.362101	CS0
25.5306	-0.362117	CS0
25.5401	-0.362132	CS0
25.5476	-0.36215	CS0
25.5562	-0.362173	CS0
25.5648	-0.362194	CS0
25.5722	-0.362231	CS0
25.5804	-0.362266	CS0
25.5901	-0.3623	CS0
25.5964	-0.362319	CS0
25.6047	-0.362334	CS0
25.6137	-0.36234	CS0
25.6216	-0.362345	CS0
25.6297	-0.362351	CS0
25.6386	-0.362357	CS0
25.6465	-0.362362	CS0
25.6555	-0.362368	CS0
25.6633	-0.362378	CS0
25.6724	-0.362389	CS0
25.6797	-0.362417	CS0
25.689	-0.362442	CS0
25.6961	-0.36246	CS0
25.7044	-0.362477	CS0
25.7136	-0.362512	CS0
25.7215	-0.362552	CS0
25.7298	-0.362577	CS0
25.7384	-0.362614	CS0
25.7453	-0.362654	CS0
25.7536	-0.362691	CS0
25.7624	-0.362722	CS0
25.7702	-0.362754	CS0
25.7797	-0.362772	CS0
25.788	-0.362778	CS0
25.7964	-0.36279	CS0
25.8045	-0.362804	CS0
25.8126	-0.362808	CS0
25.8207	-0.362811	CS0
25.8292	-0.362816	CS0
25.8368	-0.362825	CS0
25.8459	-0.362836	CS0
25.853	-0.362866	CS0
25.8618	-0.362913	CS0
25.87	-0.362975	CS0
25.8779	-0.363008	CS0
25.8869	-0.363027	CS0
25.8954	-0.363049	CS0
25.9049	-0.363055	CS0
25.9121	-0.363067	CS0
25.9194	-0.363075	CS0
25.9287	-0.363086	CS0
25.9371	-0.363094	CS0
25.9452	-0.363105	CS0
25.9538	-0.363111	CS0
25.9615	-0.36312	CS0
25.9697	-0.363129	CS0
25.9778	-0.363138	CS0
25.9866	-0.363149	CS0
25.9946	-0.363156	CS0
26.0033	-0.363166	CS0
26.0119	-0.363175	CS0
26.02	-0.363183	CS0
26.0281	-0.36319	CS0
26.0368	-0.363196	CS0
26.0451	-0.363203	CS0
26.0537	-0.363209	CS0
26.0617	-0.363215	CS0
26.0706	-0.363221	CS0
26.0777	-0.363231	CS0
26.0859	-0.363237	CS0
26.0941	-0.363243	CS0
26.1032	-0.363251	CS0
26.1103	-0.363259	CS0
26.1181	-0.363267	CS0
26.1268	-0.363282	CS0
26.1347	-0.363299	CS0
26.1441	-0.363314	CS0
26.1526	-0.363324	CS0
26.1601	-0.363331	CS0
26.1689	-0.363341	CS0
26.1767	-0.363347	CS0
26.1851	-0.363355	CS0
26.1936	-0.363364	CS0
26.2031	-0.363374	CS0
26.211	-0.36338	CS0
26.219	-0.363387	CS0
26.2264	-0.363401	CS0
26.2351	-0.363428	CS0
26.2441	-0.363465	CS0
26.2516	-0.363493	CS0
26.26	-0.363503	CS0
26.269	-0.36351	CS0
26.2763	-0.363517	CS0
26.2847	-0.363525	CS0
26.293	-0.363534	CS0
26.3016	-0.363541	CS0
26.3101	-0.363549	CS0
26.319	-0.363556	CS0
26.3276	-0.363564	CS0
26.3353	-0.363573	CS0
26.3438	-0.36358	CS0
26.3523	-0.363588	CS0
26.3593	-0.363596	CS0
26.369	-0.363602	CS0
26.3763	-0.363609	CS0
26.3851	-0.363617	CS0
26.3929	-0.363625	CS0
26.401	-0.363635	CS0
26.4092	-0.363646	CS0
26.4182	-0.363654	CS0
26.4258	-0.363673	CS0
26.4346	-0.363686	CS0
26.4427	-0.363695	CS0
26.4512	-0.363703	CS0
26.4588	-0.363712	CS0
26.4677	-0.36372	CS0
26.4759	-0.363729	CS0
26.484	-0.363736	CS0
26.492	-0.363743	CS0
26.5005	-0.36375	CS0
26.5097	-0.363757	CS0
26.5172	-0.363765	CS0
26.5258	-0.363773	CS0
26.534	-0.363781	CS0
26.543	-0.363789	CS0
26.5505	-0.363797	CS0
26.5592	-0.363819	CS0
26.567	-0.363858	CS0
26.5756	-0.363883	CS0
26.5838	-0.363903	CS0
26.5923	-0.36392	CS0
26.6001	-0.363936	CS0
26.6086	-0.363945	CS0
26.6165	-0.363954	CS0
26.6252	-0.363962	CS0
26.6336	-0.363973	CS0
26.6413	-0.36398	CS0
26.6502	-0.363987	CS0
26.6584	-0.363994	CS0
26.6676	-0.364001	CS0
26.6752	-0.364008	CS0
26.6822	-0.364015	CS0
26.6911	-0.364022	CS0
26.6997	-0.364029	CS0
26.7083	-0.364037	CS0
26.7166	-0.364045	CS0
26.7249	-0.364053	CS0
26.7339	-0.364062	CS0
26.7416	-0.364071	CS0
26.7499	-0.36408	CS0
26.7582	-0.364088	CS0
26.7667	-0.364095	CS0
26.7748	-0.364103	CS0
26.7829	-0.36411	CS0
26.7912	-0.364117	CS0
26.7993	-0.364125	CS0
26.8078	-0.364133	CS0
26.8165	-0.36414	CS0
26.8244	-0.364148	CS0
26.8326	-0.364157	CS0
26.8409	-0.364168	CS0
26.8496	-0.364176	CS0
26.8572	-0.364185	CS0
26.8655	-0.364193	CS0
26.8732	-0.364203	CS0
26.8824	-0.364212	CS0
26.8898	-0.36422	CS0
26.8987	-0.364228	CS0
26.9071	-0.364237	CS0
26.9159	-0.364245	CS0
26.9242	-0.364253	CS0
26.9319	-0.364261	CS0
26.9403	-0.364267	CS0
26.9498	-0.364273	CS0
26.9576	-0.364279	CS0
26.9655	-0.364286	CS0
26.9743	-0.364293	CS0
26.9829	-0.3643	CS0
26.9914	-0.364308	CS0
26.9995	-0.364319	CS0
27.0071	-0.364342	CS0
27.0164	-0.36436	CS0
27.0247	-0.364386	CS0
27.0331	-0.364397	CS0
27.0415	-0.364405	CS0
27.0492	-0.364412	CS0
27.0575	-0.364419	CS0
27.0663	-0.364426	CS0
27.0733	-0.364433	CS0
27.0818	-0.364439	CS0
27.0892	-0.364446	CS0
27.0988	-0.364453	CS0
27.1068	-0.36446	CS0
27.1158	-0.364467	CS0
27.1236	-0.364474	CS0
27.1314	-0.36448	CS0
27.141	-0.364485	CS0
27.149	-0.364491	CS0
27.1579	-0.364497	CS0
27.1659	-0.364505	CS0
27.1741	-0.364514	CS0
27.1823	-0.364527	CS0
27.1898	-0.364538	CS0
27.1981	-0.364546	CS0
27.2068	-0.364559	CS0
27.2147	-0.364575	CS0
27.2235	-0.364583	CS0
27.2322	-0.364591	CS0
27.2411	-0.3646	CS0
27.249	-0.364609	CS0
27.2573	-0.36462	CS0
27.2651	-0.364642	CS0
27.2729	-0.364664	CS0
27.2818	-0.364675	CS0
27.289	-0.364684	CS0
27.2979	-0.364691	CS0
27.3065	-0.364697	CS0
27.3141	-0.364703	CS0
27.3229	-0.364708	CS0
27.3317	-0.364713	CS0
27.3402	-0.364719	CS0
27.3483	-0.364725	CS0
27.3572	-0.364731	CS0
27.3641	-0.364739	CS0
27.3736	-0.364746	CS0
27.3814	-0.364754	CS0
27.39	-0.364761	CS0
27.3978	-0.364768	CS0
27.406	-0.364774	CS0
27.414	-0.364779	CS0
27.4236	-0.364784	CS0
27.4318	-0.364789	CS0
27.4387	-0.364794	CS0
27.4483	-0.3648	CS0
27.4565	-0.364807	CS0
27.4648	-0.364813	CS0
27.4731	-0.36482	CS0
27.481	-0.364828	CS0
27.489	-0.364836	CS0
27.4982	-0.364845	CS0
27.5051	-0.364856	CS0
27.5141	-0.364864	CS0
27.5218	-0.364872	CS0
27.5318	-0.36488	CS0
27.5392	-0.364887	CS0
27.5472	-0.364894	CS0
27.5559	-0.364901	CS0
27.5644	-0.364908	CS0
27.5732	-0.364916	CS0
27.5812	-0.364924	CS0
27.5886	-0.36493	CS0
27.5973	-0.364937	CS0
27.6054	-0.364942	CS0
27.6146	-0.364946	CS0
27.622	-0.36495	CS0
27.6316	-0.364954	CS0
27.6386	-0.364959	CS0
27.6482	-0.364964	CS0
27.6553	-0.36497	CS0
27.6643	-0.364977	CS0
27.6718	-0.365003	CS0
27.6803	-0.365022	CS0
27.6892	-0.365031	CS0
27.6971	-0.365039	CS0
27.7064	-0.365046	CS0
27.714	-0.365051	CS0
27.7222	-0.365056	CS0
27.7299	-0.365062	CS0
27.7385	-0.365068	CS0
27.747	-0.365075	CS0
27.755	-0.365082	CS0
27.7638	-0.365092	CS0
27.7722	-0.365098	CS0
27.7806	-0.365104	CS0
27.7888	-0.36511	CS0
27.7987	-0.365115	CS0
27.8062	-0.365121	CS0
27.8146	-0.365127	CS0
27.8228	-0.365133	CS0
27.8308	-0.365141	CS0
27.8388	-0.365149	CS0
27.8485	-0.365158	CS0
27.855	-0.365166	CS0
27.8642	-0.365173	CS0
27.8721	-0.365179	CS0
27.8802	-0.365184	CS0
27.8892	-0.365188	CS0
27.8975	-0.365192	CS0
27.9047	-0.365197	CS0
27.9132	-0.365202	CS0
27.9211	-0.365207	CS0
27.9301	-0.365213	CS0
27.9386	-0.365221	CS0
27.9475	-0.365233	CS0
27.9549	-0.365251	CS0
27.9631	-0.365259	CS0
27.9719	-0.365266	CS0
27.9805	-0.365273	CS0
27.9885	-0.36528	CS0
27.997	-0.365286	CS0
28.0056	-0.365291	CS0
28.0125	-0.365296	CS0
28.0217	-0.365302	CS0
28.0294	-0.365308	CS0
28.0383	-0.365314	CS0
28.0476	-0.365321	CS0
28.0556	-0.365327	CS0
28.064	-0.365332	CS0
28.0722	-0.365339	CS0
28.0808	-0.365346	CS0
28.0886	-0.365352	CS0
28.0974	-0.365358	CS0
28.1057	-0.365362	CS0
28.1128	-0.365368	CS0
28.1214	-0.365375	CS0
28.1302	-0.365382	CS0
28.1389	-0.365389	CS0
28.147	-0.365394	CS0
28.1562	-0.365399	CS0
28.1636	-0.365404	CS0
28.1712	-0.365411	CS0
28.1801	-0.365418	CS0
28.1876	-0.365429	CS0
28.1962	-0.365437	CS0
28.2047	-0.365444	CS0
28.2135	-0.365451	CS0
28.2215	-0.365458	CS0
28.2306	-0.365464	CS0
28.2374	-0.365469	CS0
28.2468	-0.365473	CS0
28.255	-0.365476	CS0
28.2634	-0.36548	CS0
28.2715	-0.365485	CS0
28.2796	-0.36549	CS0
28.2879	-0.365496	CS0
28.2965	-0.365503	CS0
28.3056	-0.365509	CS0
28.3132	-0.365516	CS0
28.3218	-0.365523	CS0
28.3296	-0.365528	CS0
28.3389	-0.365533	CS0
28.346	-0.365538	CS0
28.3548	-0.365542	CS0
28.3629	-0.365547	CS0
28.3713	-0.365552	CS0
28.3802	-0.365558	CS0
28.3884	-0.365563	CS0
28.3965	-0.365568	CS0
28.4049	-0.365574	CS0
28.4124	-0.36558	CS0
28.4214	-0.365586	CS0
28.4305	-0.36559	CS0
28.4387	-0.365593	CS0
28.4456	-0.365597	CS0
28.4548	-0.365601	CS0
28.4624	-0.365604	CS0
28.471	-0.365608	CS0
28.4794	-0.365611	CS0
28.4885	-0.365616	CS0
28.4961	-0.365622	CS0
28.5039	-0.365639	CS0
28.5132	-0.365669	CS0
28.5214	-0.365679	CS0
28.5292	-0.365685	CS0
28.5377	-0.365703	CS0
28.5467	-0.365712	CS0
28.5542	-0.365719	CS0
28.5615	-0.365724	CS0
28.5703	-0.36573	CS0
28.5799	-0.365735	CS0
28.5874	-0.365742	CS0
28.5961	-0.365747	CS0
28.6043	-0.365752	CS0
28.6126	-0.365755	CS0
28.6206	-0.365757	CS0
28.629	-0.365761	CS0
28.6381	-0.365763	CS0
28.6463	-0.365767	CS0
28.6541	-0.36577	CS0
28.6632	-0.365774	CS0
28.6713	-0.365778	CS0
28.6797	-0.365784	CS0
28.6889	-0.365789	CS0
28.6964	-0.365794	CS0
28.7044	-0.365802	CS0
28.7131	-0.36582	CS0
28.7214	-0.365852	CS0
28.7302	-0.365881	CS0
28.7381	-0.365901	CS0
28.7456	-0.365917	CS0
28.7542	-0.365924	CS0
28.7625	-0.36593	CS0
28.7713	-0.365935	CS0
28.7798	-0.365938	CS0
28.7871	-0.365941	CS0
28.7961	-0.365944	CS0
28.8053	-0.365948	CS0
28.8131	-0.365952	CS0
28.8209	-0.365957	CS0
28.8294	-0.365962	CS0
28.8381	-0.365967	CS0
28.8467	-0.365971	CS0
28.8551	-0.365975	CS0
28.8627	-0.365979	CS0
28.8712	-0.365984	CS0
28.8789	-0.36599	CS0
28.8878	-0.365996	CS0
28.8961	-0.366001	CS0
28.905	-0.366007	CS0
28.9125	-0.366013	CS0
28.9211	-0.366018	CS0
28.9285	-0.366023	CS0
28.9375	-0.366027	CS0
28.9458	-0.366031	CS0
28.9544	-0.366034	CS0
28.9619	-0.366039	CS0
28.9711	-0.366044	CS0
28.9785	-0.366049	CS0
28.9872	-0.366054	CS0
28.9964	-0.36606	CS0
29.0047	-0.366065	CS0
29.0128	-0.366069	CS0
29.021	-0.366074	CS0
29.0284	-0.366078	CS0
29.0376	-0.366083	CS0
29.0455	-0.366089	CS0
29.0543	-0.366095	CS0
29.0629	-0.3661	CS0
29.0702	-0.366105	CS0
29.0791	-0.366109	CS0
29.087	-0.366113	CS0
29.0963	-0.366117	CS0
29.1038	-0.366121	CS0
29.1122	-0.366125	CS0
29.1201	-0.366129	CS0
29.1286	-0.366134	CS0
29.1375	-0.366139	CS0
29.1452	-0.366144	CS0
29.1543	-0.366149	CS0
29.163	-0.366153	CS0
29.171	-0.366156	CS0
29.1802	-0.36616	CS0
29.1876	-0.366163	CS0
29.1966	-0.366166	CS0
29.2039	-0.366169	CS0
29.2123	-0.366173	CS0
29.2207	-0.366176	CS0
29.229	-0.366179	CS0
29.238	-0.366181	CS0
29.2447	-0.366185	CS0
29.2535	-0.366188	CS0
29.262	-0.366191	CS0
29.2708	-0.366194	CS0
29.278	-0.366198	CS0
29.2873	-0.366202	CS0
29.2958	-0.366206	CS0
29.3039	-0.36621	CS0
29.312	-0.366215	CS0
29.3209	-0.366219	CS0
29.3289	-0.366224	CS0
29.3373	-0.366229	CS0
29.3457	-0.366234	CS0
29.3539	-0.366237	CS0
29.3619	-0.36624	CS0
29.3707	-0.366243	CS0
29.3787	-0.366245	CS0
29.3872	-0.366247	CS0
29.3958	-0.366248	CS0
29.4035	-0.366249	CS0
29.4115	-0.366249	CS0
29.421	-0.366249	CS0
29.4282	-0.36625	CS0
29.437	-0.366251	CS0
29.4449	-0.366253	CS0
29.4543	-0.366255	CS0
29.4622	-0.366257	CS0
29.4708	-0.366261	CS0
29.4797	-0.366265	CS0
29.4872	-0.366268	CS0
29.4952	-0.366272	CS0
29.504	-0.366276	CS0
29.5124	-0.366281	CS0
29.5205	-0.366285	CS0
29.5286	-0.366288	CS0
29.5368	-0.366291	CS0
29.5462	-0.366295	CS0
29.5534	-0.366298	CS0
29.5624	-0.366301	CS0
29.5698	-0.366304	CS0
29.5793	-0.366307	CS0
29.5868	-0.366309	CS0
29.5956	-0.366311	CS0
29.6038	-0.366313	CS0
29.6127	-0.366315	CS0
29.6208	-0.366316	CS0
29.6282	-0.366318	CS0
29.6373	-0.36632	CS0
29.6459	-0.366321	CS0
29.6537	-0.366324	CS0
29.6619	-0.366328	CS0
29.6702	-0.366331	CS0
29.678	-0.366335	CS0
29.6866	-0.366339	CS0
29.6951	-0.366342	CS0
29.7036	-0.366345	CS0
29.7127	-0.366349	CS0
29.7201	-0.366353	CS0
29.7287	-0.366357	CS0
29.7361	-0.366361	CS0
29.7446	-0.366365	CS0
29.7534	-0.366368	CS0
29.762	-0.366372	CS0
29.7701	-0.366375	CS0
29.7784	-0.366378	CS0
29.7876	-0.36638	CS0
29.7958	-0.366382	CS0
29.8034	-0.366385	CS0
29.8118	-0.366389	CS0
29.8204	-0.366393	CS0
29.8287	-0.366397	CS0
29.8368	-0.366401	CS0
29.8455	-0.366405	CS0
29.8527	-0.366407	CS0
29.8617	-0.36641	CS0
29.87	-0.366412	CS0
29.8781	-0.366414	CS0
29.8869	-0.366417	CS0
29.8945	-0.36642	CS0
29.9032	-0.366424	CS0
29.9122	-0.366428	CS0
29.9201	-0.366432	CS0
29.9287	-0.366437	CS0
29.9366	-0.36644	CS0
29.9452	-0.366444	CS0
29.9545	-0.366447	CS0
29.9629	-0.36645	CS0
29.9701	-0.366454	CS0
29.9783	-0.366457	CS0
29.987	-0.36646	CS0
29.9957	-0.366463	CS0
30.0031	-0.366466	CS0
30.0118	-0.366468	CS0
30.0206	-0.366471	CS0
30.0274	-0.366473	CS0
30.0363	-0.366475	CS0
30.0443	-0.366479	CS0
30.0539	-0.366483	CS0
30.0629	-0.366487	CS0
30.0704	-0.366492	CS0
30.0797	-0.366497	CS0
30.0865	-0.366502	CS0
30.0955	-0.366506	CS0
30.1025	-0.36651	CS0
30.1119	-0.366515	CS0
30.1206	-0.366519	CS0
30.1283	-0.366523	CS0
30.1363	-0.366526	CS0
30.1459	-0.36653	CS0
30.1547	-0.366534	CS0
30.1625	-0.366538	CS0
30.1706	-0.366542	CS0
30.1802	-0.366545	CS0
30.187	-0.366547	CS0
30.1955	-0.366549	CS0
30.2046	-0.366553	CS0
30.2117	-0.366556	CS0
30.2196	-0.36656	CS0
30.2284	-0.366564	CS0
30.2373	-0.366569	CS0
30.2451	-0.366576	CS0
30.2523	-0.366587	CS0
30.2627	-0.366592	CS0
30.2708	-0.366596	CS0
30.2792	-0.366599	CS0
30.2869	-0.366602	CS0
30.2952	-0.366605	CS0
30.3039	-0.366606	CS0
30.3127	-0.366606	CS0
30.3205	-0.366607	CS0
30.3288	-0.366607	CS0
30.338	-0.366609	CS0
30.3464	-0.366611	CS0
30.3543	-0.366613	CS0
30.3628	-0.366616	CS0
30.3703	-0.36662	CS0
30.3797	-0.366624	CS0
30.3878	-0.366631	CS0
30.3949	-0.366639	CS0
30.4038	-0.366647	CS0
30.413	-0.366655	CS0
30.4203	-0.36666	CS0
30.4283	-0.366665	CS0
30.4366	-0.366669	CS0
30.4444	-0.366674	CS0
30.4538	-0.366678	CS0
30.4618	-0.366681	CS0
30.4705	-0.366684	CS0
30.4784	-0.366688	CS0
30.4874	-0.366692	CS0
30.4944	-0.366696	CS0
30.5042	-0.366699	CS0
30.5118	-0.366703	CS0
30.5204	-0.366706	CS0
30.5284	-0.366709	CS0
30.5366	-0.366711	CS0
30.5448	-0.366713	CS0
30.553	-0.366715	CS0
30.5613	-0.366718	CS0
30.5691	-0.366721	CS0
30.5793	-0.366724	CS0
30.5873	-0.366726	CS0
30.596	-0.366728	CS0
30.6038	-0.366731	CS0
30.6127	-0.366734	CS0
30.6206	-0.366737	CS0
30.6287	-0.366738	CS0
30.6371	-0.36674	CS0
30.6452	-0.366741	CS0
30.6536	-0.366742	CS0
30.6622	-0.366744	CS0
30.67	-0.366746	CS0
30.6783	-0.366748	CS0
30.6862	-0.366751	CS0
30.6944	-0.366754	CS0
30.7032	-0.366757	CS0
30.7115	-0.366759	CS0
30.7197	-0.366762	CS0
30.7293	-0.366765	CS0
30.737	-0.366767	CS0
30.7459	-0.366769	CS0
30.7541	-0.366771	CS0
30.7624	-0.366773	CS0
30.7707	-0.366775	CS0
30.7786	-0.366778	CS0
30.7877	-0.36678	CS0
30.7951	-0.366784	CS0
30.8037	-0.366787	CS0
30.8124	-0.366789	CS0
30.8205	-0.366791	CS0
30.8287	-0.366793	CS0
30.8375	-0.366794	CS0
30.8456	-0.366796	CS0
30.8536	-0.366798	CS0
30.8619	-0.366798	CS0
30.8694	-0.366799	CS0
30.8783	-0.366799	CS0
30.8868	-0.3668	CS0
30.8958	-0.366801	CS0
30.9034	-0.366803	CS0
30.9119	-0.366806	CS0
30.9207	-0.366807	CS0
30.9283	-0.36681	CS0
30.9373	-0.366812	CS0
30.945	-0.366815	CS0
30.9543	-0.366818	CS0
30.9622	-0.366822	CS0
30.9703	-0.366825	CS0
30.9787	-0.366828	CS0
30.9866	-0.366831	CS0
30.995	-0.366834	CS0
31.0054	-0.366838	CS0
31.0137	-0.366841	CS0
31.0208	-0.366845	CS0
31.0281	-0.366848	CS0
31.0365	-0.366851	CS0
31.0458	-0.366854	CS0
31.0535	-0.36686	CS0
31.062	-0.366864	CS0
31.0701	-0.366868	CS0
31.0784	-0.366871	CS0
31.0881	-0.366874	CS0
31.0955	-0.366876	CS0
31.1041	-0.366878	CS0
31.112	-0.36688	CS0
31.1197	-0.366882	CS0
31.1286	-0.366883	CS0
31.1366	-0.366886	CS0
31.1447	-0.366889	CS0
31.1538	-0.366893	CS0
31.1627	-0.366897	CS0
31.1704	-0.366902	CS0
31.1799	-0.366906	CS0
31.1879	-0.366909	CS0
31.196	-0.366912	CS0
31.2047	-0.366915	CS0
31.2133	-0.366918	CS0
31.2207	-0.36692	CS0
31.2287	-0.366922	CS0
31.2366	-0.366924	CS0
31.245	-0.366926	CS0
31.2534	-0.366928	CS0
31.2623	-0.36693	CS0
31.2708	-0.36693	CS0
31.2789	-0.366931	CS0
31.2872	-0.366932	CS0
31.2955	-0.366932	CS0
31.3052	-0.366933	CS0
31.3126	-0.366935	CS0
31.3215	-0.366938	CS0
31.329	-0.366941	CS0
31.3376	-0.366945	CS0
31.3456	-0.366952	CS0
31.354	-0.366958	CS0
31.3616	-0.366962	CS0
31.3707	-0.366965	CS0
31.3796	-0.366967	CS0
31.3874	-0.366969	CS0
31.3957	-0.366971	CS0
31.4054	-0.366973	CS0
31.4126	-0.366976	CS0
31.4208	-0.36698	CS0
31.4302	-0.366983	CS0
31.4369	-0.366986	CS0
31.4451	-0.366988	CS0
31.4536	-0.36699	CS0
31.4623	-0.36699	CS0
31.4706	-0.36699	CS0
31.479	-0.366991	CS0
31.4871	-0.366991	CS0
31.4957	-0.366992	CS0
31.5041	-0.366993	CS0
31.5131	-0.366996	CS0
31.5217	-0.367001	CS0
31.5301	-0.367006	CS0
31.5377	-0.36701	CS0
31.5462	-0.367015	CS0
31.5544	-0.367019	CS0
31.5624	-0.367023	CS0
31.5708	-0.367028	CS0
31.5796	-0.367032	CS0
31.5877	-0.367034	CS0
31.5962	-0.367036	CS0
31.604	-0.367037	CS0
31.6132	-0.367039	CS0
31.6209	-0.36704	CS0
31.6292	-0.367042	CS0
31.6376	-0.367044	CS0
31.6451	-0.367046	CS0
31.6543	-0.367048	CS0
31.6622	-0.36705	CS0
31.6719	-0.367052	CS0
31.6798	-0.367054	CS0
31.6878	-0.367055	CS0
31.6967	-0.367055	CS0
31.7047	-0.367056	CS0
31.7126	-0.367056	CS0
31.7215	-0.367056	CS0
31.7296	-0.367056	CS0
31.738	-0.367056	CS0
31.7463	-0.367056	CS0
31.754	-0.367056	CS0
31.7631	-0.367057	CS0
31.7709	-0.367059	CS0
31.7798	-0.367062	CS0
31.7879	-0.367066	CS0
31.7966	-0.367073	CS0
31.8047	-0.367079	CS0
31.8122	-0.367098	CS0
31.8204	-0.367118	CS0
31.8297	-0.367135	CS0
31.837	-0.367141	CS0
31.8454	-0.367144	CS0
31.854	-0.367147	CS0
31.8635	-0.367149	CS0
31.8707	-0.367151	CS0
31.8791	-0.367151	CS0
31.8877	-0.367151	CS0
31.8965	-0.36715	CS0
31.9053	-0.367149	CS0
31.9132	-0.36715	CS0
31.9215	-0.367151	CS0
31.931	-0.367153	CS0
31.9387	-0.367154	CS0
31.947	-0.367156	CS0
31.955	-0.367159	CS0
31.963	-0.367162	CS0
31.9721	-0.367165	CS0
31.9797	-0.367167	CS0
31.9871	-0.367168	CS0
31.9962	-0.367168	CS0
32.004	-0.367169	CS0
32.0127	-0.367169	CS0
32.0211	-0.367169	CS0
32.0291	-0.36717	CS0
32.0376	-0.367172	CS0
32.046	-0.367174	CS0
32.0547	-0.367176	CS0
32.0632	-0.367179	CS0
32.0717	-0.367182	CS0
32.0797	-0.367185	CS0
32.0883	-0.367188	CS0
32.0959	-0.367191	CS0
32.104	-0.367192	CS0
32.1128	-0.367193	CS0
32.121	-0.367193	CS0
32.1303	-0.367193	CS0
32.1384	-0.367193	CS0
32.1471	-0.367194	CS0
32.1545	-0.367194	CS0
32.1631	-0.367195	CS0
32.1721	-0.367196	CS0
32.1798	-0.367197	CS0
32.1887	-0.367199	CS0
32.1964	-0.367201	CS0
32.2045	-0.367202	CS0
32.2127	-0.367205	CS0
32.2206	-0.367208	CS0
32.2304	-0.367211	CS0
32.2371	-0.367214	CS0
32.2462	-0.367217	CS0
32.2536	-0.367219	CS0
32.2624	-0.36722	CS0
32.2706	-0.367222	CS0
32.279	-0.367221	CS0
32.2879	-0.367222	CS0
32.2968	-0.367223	CS0
32.3057	-0.367225	CS0
32.313	-0.367228	CS0
32.322	-0.367234	CS0
32.3297	-0.367242	CS0
32.3395	-0.367248	CS0
32.3462	-0.367252	CS0
32.3549	-0.367255	CS0
32.3636	-0.367257	CS0
32.3719	-0.367258	CS0
32.3802	-0.367259	CS0
32.3877	-0.367259	CS0
32.3972	-0.36726	CS0
32.4055	-0.367262	CS0
32.4145	-0.367264	CS0
32.4223	-0.367266	CS0
32.4297	-0.367268	CS0
32.4377	-0.36727	CS0
32.4468	-0.367271	CS0
32.4551	-0.367272	CS0
32.4637	-0.367274	CS0
32.4719	-0.367277	CS0
32.4801	-0.36728	CS0
32.4878	-0.367284	CS0
32.4965	-0.367287	CS0
32.505	-0.36729	CS0
32.5132	-0.367293	CS0
32.5209	-0.367296	CS0
32.5296	-0.367299	CS0
32.5378	-0.367302	CS0
32.5456	-0.367304	CS0
32.5551	-0.367305	CS0
32.5629	-0.367308	CS0
32.5714	-0.367311	CS0
32.5796	-0.367314	CS0
32.5887	-0.367317	CS0
32.5967	-0.36732	CS0
32.6051	-0.367323	CS0
32.6134	-0.367325	CS0
32.6222	-0.367326	CS0
32.6309	-0.367329	CS0
32.6381	-0.367331	CS0
32.6474	-0.367333	CS0
32.6558	-0.367337	CS0
32.6632	-0.367339	CS0
32.6717	-0.367342	CS0
32.6797	-0.367345	CS0
32.6886	-0.367349	CS0
32.6965	-0.367352	CS0
32.7061	-0.367356	CS0
32.7144	-0.367359	CS0
32.722	-0.367362	CS0
32.7306	-0.367364	CS0
32.7388	-0.367366	CS0
32.7478	-0.367369	CS0
32.7557	-0.367372	CS0
32.7632	-0.367374	CS0
32.7716	-0.367376	CS0
32.7804	-0.367377	CS0
32.7886	-0.367376	CS0
32.7967	-0.367375	CS0
32.8056	-0.367374	CS0
32.8143	-0.367372	CS0
32.8225	-0.367373	CS0
32.8313	-0.367374	CS0
32.8391	-0.367375	CS0
32.8472	-0.367376	CS0
32.856	-0.36738	CS0
32.864	-0.367388	CS0
32.8724	-0.367393	CS0
32.8801	-0.367395	CS0
32.8887	-0.367396	CS0
32.8964	-0.367397	CS0
32.905	-0.367397	CS0
32.9127	-0.367398	CS0
32.9216	-0.367399	CS0
32.9307	-0.367399	CS0
32.939	-0.3674	CS0
32.9468	-0.367402	CS0
32.9554	-0.367404	CS0
32.9643	-0.367406	CS0
32.9728	-0.367409	CS0
32.9817	-0.367411	CS0
32.9893	-0.367413	CS0
32.9976	-0.367415	CS0
33.0063	-0.367416	CS0
33.0136	-0.367418	CS0
33.0224	-0.36742	CS0
33.0311	-0.367422	CS0
33.0385	-0.367424	CS0
33.0469	-0.367425	CS0
33.0556	-0.367427	CS0
33.0632	-0.367428	CS0
33.0723	-0.367429	CS0
33.0807	-0.36743	CS0
33.0898	-0.367431	CS0
33.0978	-0.367432	CS0
33.1063	-0.367433	CS0
33.1146	-0.367434	CS0
33.1225	-0.367434	CS0
33.13	-0.367434	CS0
33.1392	-0.367434	CS0
33.148	-0.367434	CS0
33.1557	-0.367436	CS0
33.1631	-0.367437	CS0
33.1723	-0.367438	CS0
33.1807	-0.367439	CS0
33.1897	-0.36744	CS0
33.1978	-0.367441	CS0
33.2055	-0.367442	CS0
33.2141	-0.367442	CS0
33.2232	-0.367443	CS0
33.231	-0.367444	CS0
33.2392	-0.367444	CS0
33.2473	-0.367444	CS0
33.2556	-0.367446	CS0
33.2637	-0.367446	CS0
33.2711	-0.367447	CS0
33.2804	-0.367447	CS0
33.2892	-0.367446	CS0
33.2982	-0.367445	CS0
33.3057	-0.367445	CS0
33.3144	-0.367446	CS0
33.322	-0.367448	CS0
33.3301	-0.367449	CS0
33.3397	-0.367451	CS0
33.3481	-0.367453	CS0
33.3557	-0.367455	CS0
33.3646	-0.367457	CS0
33.3727	-0.367458	CS0
33.38	-0.367458	CS0
33.3892	-0.367457	CS0
33.3972	-0.367457	CS0
33.4053	-0.367456	CS0
33.4142	-0.367456	CS0
33.422	-0.367456	CS0
33.4304	-0.367455	CS0
33.4378	-0.367456	CS0
33.4478	-0.367458	CS0
33.4559	-0.36746	CS0
33.465	-0.367463	CS0
33.4735	-0.367465	CS0
33.4818	-0.367467	CS0
33.4896	-0.36747	CS0
33.4984	-0.367472	CS0
33.5064	-0.367473	CS0
33.5141	-0.367473	CS0
33.523	-0.367471	CS0
33.5316	-0.367469	CS0
33.5399	-0.367468	CS0
33.5474	-0.367467	CS0
33.5553	-0.367467	CS0
33.5644	-0.367467	CS0
33.5728	-0.367468	CS0
33.5812	-0.36747	CS0
33.5889	-0.367472	CS0
33.5982	-0.367475	CS0
33.6055	-0.36748	CS0
33.6142	-0.367482	CS0
33.6221	-0.367483	CS0
33.6305	-0.367484	CS0
33.6386	-0.367485	CS0
33.6479	-0.367485	CS0
33.6571	-0.367483	CS0
33.6647	-0.367482	CS0
33.6717	-0.367481	CS0
33.6806	-0.36748	CS0
33.6894	-0.36748	CS0
33.6978	-0.367481	CS0
33.7061	-0.367482	CS0
33.7146	-0.367484	CS0
33.7233	-0.367485	CS0
33.7304	-0.367487	CS0
33.7389	-0.367488	CS0
33.7472	-0.367488	CS0
33.7554	-0.367487	CS0
33.7642	-0.367487	CS0
33.7722	-0.367488	CS0
33.7809	-0.367488	CS0
33.7893	-0.367489	CS0
33.7972	-0.367491	CS0
33.8058	-0.367493	CS0
33.8141	-0.367494	CS0
33.8218	-0.367496	CS0
33.8304	-0.367497	CS0
33.8394	-0.367498	CS0
33.8484	-0.367498	CS0
33.8565	-0.367499	CS0
33.8646	-0.3675	CS0
33.8724	-0.367501	CS0
33.8807	-0.367502	CS0
33.8895	-0.367504	CS0
33.898	-0.367504	CS0
33.9049	-0.367505	CS0
33.9141	-0.367505	CS0
33.922	-0.367505	CS0
33.9304	-0.367506	CS0
33.9393	-0.367506	CS0
33.9464	-0.367508	CS0
33.9552	-0.367509	CS0
33.9653	-0.367509	CS0
33.972	-0.36751	CS0
33.9807	-0.367511	CS0
33.9888	-0.367512	CS0
33.9971	-0.367513	CS0
34.0059	-0.367514	CS0
34.0141	-0.367515	CS0
34.0228	-0.367516	CS0
34.0296	-0.367516	CS0
34.0393	-0.367518	CS0
34.0474	-0.367519	CS0
34.056	-0.367519	CS0
34.0644	-0.367519	CS0
34.0725	-0.367519	CS0
34.0802	-0.36752	CS0
34.0881	-0.36752	CS0
34.0966	-0.367521	CS0
34.1058	-0.367522	CS0
34.113	-0.367524	CS0
34.1221	-0.367526	CS0
34.1304	-0.367529	CS0
34.1382	-0.367532	CS0
34.1472	-0.367534	CS0
34.1559	-0.367537	CS0
34.1648	-0.367539	CS0
34.1723	-0.367539	CS0
34.1815	-0.36754	CS0
34.1897	-0.36754	CS0
34.1972	-0.36754	CS0
34.2062	-0.36754	CS0
34.2142	-0.367541	CS0
34.2224	-0.367543	CS0
34.2307	-0.367545	CS0
34.2398	-0.367547	CS0
34.2472	-0.36755	CS0
34.2557	-0.367554	CS0
34.2638	-0.367556	CS0
34.2731	-0.367559	CS0
34.2815	-0.367563	CS0
34.2891	-0.367566	CS0
34.2973	-0.367569	CS0
34.3066	-0.367573	CS0
34.315	-0.367576	CS0
34.3219	-0.367578	CS0
34.3309	-0.36758	CS0
34.3382	-0.367583	CS0
34.3473	-0.367584	CS0
34.3551	-0.367585	CS0
34.3646	-0.367587	CS0
34.3728	-0.367589	CS0
34.3808	-0.367591	CS0
34.3885	-0.367593	CS0
34.397	-0.367595	CS0
34.4062	-0.367595	CS0
34.4141	-0.367596	CS0
34.4223	-0.367598	CS0
34.4306	-0.3676	CS0
34.4394	-0.367601	CS0
34.4485	-0.367603	CS0
34.4564	-0.367604	CS0
34.4654	-0.367606	CS0
34.472	-0.367607	CS0
34.4807	-0.367609	CS0
34.4886	-0.36761	CS0
34.497	-0.367611	CS0
34.5055	-0.367612	CS0
34.5144	-0.367614	CS0
34.5222	-0.367616	CS0
34.531	-0.36762	CS0
34.5393	-0.367624	CS0
34.5479	-0.367631	CS0
34.5567	-0.36764	CS0
34.5642	-0.367645	CS0
34.5723	-0.367649	CS0
34.5814	-0.367653	CS0
34.5889	-0.367655	CS0
34.5975	-0.367657	CS0
34.606	-0.367658	CS0
34.614	-0.367659	CS0
34.6231	-0.36766	CS0
34.6297	-0.36766	CS0
34.6403	-0.367661	CS0
34.6482	-0.367662	CS0
34.656	-0.367663	CS0
34.6641	-0.367664	CS0
34.6737	-0.367665	CS0
34.6818	-0.367666	CS0
34.6903	-0.367667	CS0
34.6983	-0.367669	CS0
34.707	-0.367672	CS0
34.7148	-0.367675	CS0
34.723	-0.367679	CS0
34.7316	-0.367683	CS0
34.7397	-0.367685	CS0
34.7482	-0.367687	CS0
34.756	-0.367688	CS0
34.7649	-0.367689	CS0
34.7733	-0.367689	CS0
34.7807	-0.367689	CS0
34.7892	-0.367689	CS0
34.7971	-0.36769	CS0
34.8061	-0.367691	CS0
34.814	-0.367694	CS0
34.8231	-0.367696	CS0
34.8306	-0.367697	CS0
34.8387	-0.367699	CS0
34.8476	-0.3677	CS0
34.8563	-0.367702	CS0
34.8645	-0.367705	CS0
34.873	-0.367708	CS0
34.8815	-0.36771	CS0
34.8895	-0.367712	CS0
34.897	-0.367714	CS0
34.906	-0.367716	CS0
34.9141	-0.367716	CS0
34.9224	-0.367716	CS0
34.9317	-0.367716	CS0
34.9408	-0.367717	CS0
34.9481	-0.367717	CS0
34.9568	-0.367719	CS0
34.965	-0.36772	CS0
34.9741	-0.367721	CS0
34.982	-0.367722	CS0
34.9893	-0.367721	CS0
34.9982	-0.367721	CS0
35.0062	-0.36772	CS0
35.0149	-0.36772	CS0
35.0227	-0.367719	CS0
35.0308	-0.367719	CS0
35.0395	-0.36772	CS0
35.0487	-0.367721	CS0
35.0566	-0.367722	CS0
35.0641	-0.367724	CS0
35.0733	-0.367726	CS0
35.0814	-0.367728	CS0
35.0896	-0.367729	CS0
35.098	-0.367731	CS0
35.1065	-0.367732	CS0
35.1161	-0.367735	CS0
35.1226	-0.367737	CS0
35.1318	-0.367738	CS0
35.1409	-0.36774	CS0
35.1486	-0.367741	CS0
35.157	-0.367742	CS0
35.1656	-0.367744	CS0
[truncated: 22,006 more rows]

## Sheet: Trehalose_points
Temperature	adjusted_heatflow
33.892	-0.323344
34.3682	-0.328479
33.8959	-0.333638
33.0038	-0.340469
35.2131	-0.345457
37.9714	-0.323503
38.945	-0.328723
37.9658	-0.334188
40.2173	-0.341094
42.935	-0.346493

## Sheet: Sucrose_points
Temperature	adjusted_heatflow
33.898	-0.322965
33.5106	-0.328725
34.4062	-0.334989
33.5164	-0.340544
34.7047	-0.346333
37.9765	-0.323101
38.5231	-0.329084
38.185	-0.33523
38.5209	-0.341018
42.2097	-0.347005

## Sheet: CAHSD_Trehalose_6
Sample	Trial	Tm	Enthalpy	Avg_Tm	Stdev_Tm	Avg_Enthalpy	Stdev_Enthalpy	C_Enthalpy	Avg_C_Enthalpy	Stdev_C_Enthalpy
CT0	1	35.7994	0.0058777	35.6332	0.144455	0.00570993	0.000552785
CT0	2	35.5376	0.0061594
CT0	3	35.5627	0.0050927
CT1	1	35.7994	0.0068068	36.0732	0.616344	0.007155	0.00076072	-0.0009291	0.00144507	0.000476348
CT1	2	36.779	0.0080275					-0.0018681
CT1	3	35.6412	0.0066307					-0.001538
CT10	1	35.6478	0.011602	35.4301	0.448257	0.00820737	0.00316757	-0.0057243	0.00249743	0.00327763
CT10	2	34.9145	0.0053307					0.0008287
CT10	3	35.7279	0.0076894					-0.0025967
CT100	1	36.1757	0.018184	35.8438	0.294793	0.0205153	0.00747869	-0.0123063	0.0148054	0.00701011
CT100	2	35.6123	0.028882					-0.0227226
CT100	3	35.7433	0.01448					-0.0093873
CT500	1	38.539	0.049974	38.5054	0.171616	0.0479427	0.00360969	-0.0440963	0.0422327	0.00402324
CT500	2	38.3195	0.043775					-0.0376156
CT500	3	38.6577	0.050079					-0.0449863

## Sheet: CAHSD_Sucrose_6
Sample	Trial	Tm	Enthalpy	Avg_Tm	Stdev_Tm	Avg_Enthalpy	Stdev_Enthalpy	C_Enthalpy	Avg_C_Enthalpy	Stdev_C_Enthalpy
CS0	1	35.7905	0.0056402	35.7273	0.16736	0.00636843	0.000852267
CS0	2	35.5376	0.0061593
CS0	3	35.8539	0.0073058
CS1	1	35.753	0.009263	35.6166	0.387976	0.00963963	0.000410384	-0.0036228	0.0032712	0.000444772
CS1	2	35.1788	0.0095789					-0.0034196
CS1	3	35.9179	0.010077					-0.0027712
CS10	1	35.1271	0.0087953	36.1283	0.896729	0.00809047	0.000619998	-0.0031551	0.00172203	0.00141607
CS10	2	36.8576	0.0078467					-0.0016874
CS10	3	36.4003	0.0076294					-0.0003236
CS100	1	35.9269	0.0069961	35.8051	0.105886	0.010846	0.0033352	-0.0013559	0.0044776	0.00278222
CS100	2	35.7348	0.012855					-0.0066957
CS100	3	35.7537	0.012687					-0.0053812
CS500	1	38.0787	0.034806	38.0881	0.0155597	0.0379753	0.00502067	-0.0291658	0.0316069	0.00420138
CS500	2	38.1061	0.035356					-0.0291967
CS500	3	38.0796	0.043764					-0.0364582
