# Supplementary material for: Disordered proteins interact with the chemical environment to tune their protective function during drying
Source: eLife. 2024 Nov 19;13:RP97231. doi: 10.7554/eLife.97231 (PMC11575898; doi:10.7554/eLife.97231)
Supplement: Figure 5—source data 3. [file elife-97231-fig5-data3.xlsx]

## Sheet: AavLEA1_Trehalose
Temperature	Heat Flow (Normalized)	Sample
20.0193	-0.015564	T0
20.0196	-0.0155638	T0
20.0194	-0.0155636	T0
20.0201	-0.015563	T0
20.0201	-0.0155625	T0
20.0201	-0.0155621	T0
20.0193	-0.0155615	T0
20.0196	-0.0155611	T0
20.0196	-0.0155604	T0
20.0199	-0.0155597	T0
20.0198	-0.0155593	T0
20.0199	-0.0155593	T0
20.02	-0.0155593	T0
20.0198	-0.0155594	T0
20.0201	-0.0155594	T0
20.0203	-0.0155594	T0
20.0204	-0.0155595	T0
20.0208	-0.0155596	T0
20.0209	-0.0155598	T0
20.0211	-0.0155602	T0
20.021	-0.0155607	T0
20.021	-0.0155613	T0
20.022	-0.0155623	T0
20.0215	-0.0155638	T0
20.0221	-0.0155669	T0
20.0223	-0.0155708	T0
20.023	-0.0155753	T0
20.0231	-0.0155824	T0
20.023	-0.0155908	T0
20.0234	-0.0155994	T0
20.0241	-0.0156074	T0
20.0249	-0.0156183	T0
20.0251	-0.0156313	T0
20.0253	-0.0156533	T0
20.0258	-0.0156873	T0
20.0262	-0.0157347	T0
20.0273	-0.0157828	T0
20.0275	-0.0158517	T0
20.0283	-0.0159484	T0
20.0287	-0.0160749	T0
20.0289	-0.0162319	T0
20.0304	-0.0163981	T0
20.0308	-0.0165937	T0
20.0315	-0.016846	T0
20.0325	-0.0171503	T0
20.0333	-0.0174824	T0
20.034	-0.0178173	T0
20.0353	-0.0181273	T0
20.0371	-0.0184627	T0
20.0375	-0.0188018	T0
20.039	-0.0192086	T0
20.0407	-0.0196192	T0
20.0413	-0.0200867	T0
20.0425	-0.0205647	T0
20.0439	-0.0210588	T0
20.046	-0.0215987	T0
20.0465	-0.0220641	T0
20.0483	-0.022632	T0
20.0497	-0.0231527	T0
20.0512	-0.0236943	T0
20.0527	-0.0242223	T0
20.0545	-0.0248623	T0
20.0563	-0.0255367	T0
20.058	-0.0262238	T0
20.0596	-0.0268974	T0
20.0616	-0.0276747	T0
20.0635	-0.0284023	T0
20.066	-0.0291692	T0
20.0676	-0.0299433	T0
20.0698	-0.0307637	T0
20.072	-0.0315749	T0
20.0742	-0.0323809	T0
20.0758	-0.0332163	T0
20.0782	-0.0341349	T0
20.0806	-0.0350144	T0
20.0828	-0.035958	T0
20.0853	-0.0369188	T0
20.0882	-0.0379326	T0
20.0903	-0.0389997	T0
20.0925	-0.0400928	T0
20.0955	-0.0411738	T0
20.0982	-0.042267	T0
20.1004	-0.0433541	T0
20.1036	-0.0444479	T0
20.1062	-0.0456503	T0
20.1095	-0.0468365	T0
20.1122	-0.0480875	T0
20.116	-0.0493022	T0
20.1183	-0.0505881	T0
20.1219	-0.0518827	T0
20.1247	-0.0531685	T0
20.1271	-0.0544347	T0
20.1302	-0.0557378	T0
20.1337	-0.0570937	T0
20.137	-0.0583944	T0
20.14	-0.0597304	T0
20.1436	-0.0611381	T0
20.1464	-0.0626084	T0
20.15	-0.0640138	T0
20.1537	-0.0654719	T0
20.157	-0.066909	T0
20.161	-0.0683679	T0
20.1645	-0.0698471	T0
20.1686	-0.0713083	T0
20.1718	-0.0727424	T0
20.1751	-0.0742042	T0
20.18	-0.0756331	T0
20.183	-0.0771419	T0
20.1871	-0.0786325	T0
20.1907	-0.0800704	T0
20.194	-0.0815565	T0
20.1978	-0.0830846	T0
20.2021	-0.0846596	T0
20.206	-0.0861353	T0
20.2099	-0.0876741	T0
20.2138	-0.0892128	T0
20.2182	-0.0908563	T0
20.2222	-0.0923518	T0
20.2258	-0.0939298	T0
20.2308	-0.0954047	T0
20.2345	-0.0969076	T0
20.239	-0.0984078	T0
20.2434	-0.0998993	T0
20.2465	-0.101377	T0
20.2512	-0.102941	T0
20.256	-0.104445	T0
20.2598	-0.10598	T0
20.2645	-0.107596	T0
20.2684	-0.109088	T0
20.2738	-0.110631	T0
20.2778	-0.112096	T0
20.2823	-0.113563	T0
20.2867	-0.115003	T0
20.2914	-0.116468	T0
20.2954	-0.117844	T0
20.3	-0.119339	T0
20.3051	-0.12077	T0
20.3101	-0.122302	T0
20.3149	-0.123783	T0
20.319	-0.125287	T0
20.3241	-0.126777	T0
20.3287	-0.128223	T0
20.3333	-0.129667	T0
20.338	-0.131139	T0
20.3431	-0.132544	T0
20.3476	-0.133881	T0
20.3528	-0.135298	T0
20.3574	-0.136631	T0
20.3626	-0.138046	T0
20.3675	-0.139389	T0
20.3723	-0.140698	T0
20.3771	-0.14208	T0
20.3818	-0.143383	T0
20.3871	-0.144773	T0
20.3924	-0.146123	T0
20.3971	-0.14745	T0
20.402	-0.148745	T0
20.4073	-0.150151	T0
20.4129	-0.151468	T0
20.4179	-0.152813	T0
20.4228	-0.15412	T0
20.4281	-0.155384	T0
20.4331	-0.156595	T0
20.4386	-0.157813	T0
20.4441	-0.159069	T0
20.4483	-0.160314	T0
20.4537	-0.161548	T0
20.459	-0.162713	T0
20.4646	-0.164008	T0
20.4702	-0.165274	T0
20.4757	-0.166452	T0
20.481	-0.167656	T0
20.4858	-0.168813	T0
20.4917	-0.170013	T0
20.4971	-0.171232	T0
20.5026	-0.17241	T0
20.5078	-0.173547	T0
20.5133	-0.174651	T0
20.5191	-0.175809	T0
20.5248	-0.177024	T0
20.5299	-0.178142	T0
20.5358	-0.179269	T0
20.5414	-0.180402	T0
20.547	-0.181498	T0
20.5524	-0.182564	T0
20.5579	-0.183688	T0
20.5636	-0.184825	T0
20.5692	-0.185873	T0
20.5755	-0.186941	T0
20.5806	-0.187998	T0
20.5866	-0.189013	T0
20.592	-0.190003	T0
20.5978	-0.191001	T0
20.6034	-0.191969	T0
20.6099	-0.192991	T0
20.6151	-0.193996	T0
20.6208	-0.195059	T0
20.627	-0.196086	T0
20.6325	-0.197107	T0
20.6382	-0.198153	T0
20.6446	-0.199177	T0
20.6502	-0.200155	T0
20.6562	-0.201097	T0
20.662	-0.202078	T0
20.6682	-0.203019	T0
20.6733	-0.203954	T0
20.6801	-0.204942	T0
20.686	-0.205823	T0
20.6915	-0.206822	T0
20.6979	-0.207766	T0
20.7041	-0.208677	T0
20.7096	-0.209565	T0
20.7159	-0.210493	T0
20.7218	-0.21138	T0
20.7284	-0.212272	T0
20.7346	-0.213131	T0
20.7401	-0.214082	T0
20.7471	-0.215	T0
20.7528	-0.215856	T0
20.7591	-0.216772	T0
20.7652	-0.217692	T0
20.7718	-0.218545	T0
20.7782	-0.219374	T0
20.784	-0.220179	T0
20.7896	-0.221026	T0
20.7961	-0.221867	T0
20.8023	-0.222683	T0
20.8079	-0.223493	T0
20.8145	-0.224285	T0
20.8212	-0.225106	T0
20.8269	-0.225878	T0
20.8338	-0.226666	T0
20.8398	-0.227435	T0
20.8467	-0.228231	T0
20.853	-0.229028	T0
20.8585	-0.229852	T0
20.8656	-0.230653	T0
20.8721	-0.231439	T0
20.8786	-0.232215	T0
20.8847	-0.232998	T0
20.8911	-0.233705	T0
20.8976	-0.234419	T0
20.9044	-0.23516	T0
20.9109	-0.235872	T0
20.917	-0.236628	T0
20.9238	-0.23742	T0
20.9298	-0.238188	T0
20.9364	-0.238886	T0
20.9429	-0.239679	T0
20.9496	-0.240511	T0
20.9556	-0.241243	T0
20.9626	-0.241956	T0
20.9692	-0.242628	T0
20.9765	-0.243306	T0
20.9828	-0.243995	T0
20.9892	-0.244656	T0
20.996	-0.245295	T0
21.0027	-0.245892	T0
21.0089	-0.246434	T0
21.0151	-0.247046	T0
21.0219	-0.24776	T0
21.0287	-0.248407	T0
21.0356	-0.249142	T0
21.0416	-0.249737	T0
21.0487	-0.250407	T0
21.056	-0.25118	T0
21.0627	-0.25181	T0
21.0692	-0.252416	T0
21.0755	-0.253059	T0
21.0823	-0.25374	T0
21.0884	-0.254286	T0
21.0958	-0.254893	T0
21.1029	-0.255484	T0
21.1096	-0.256118	T0
21.1159	-0.256683	T0
21.1228	-0.257332	T0
21.1296	-0.258012	T0
21.1362	-0.258622	T0
21.1436	-0.259178	T0
21.1506	-0.259741	T0
21.1571	-0.260429	T0
21.1635	-0.261023	T0
21.1707	-0.261577	T0
21.1779	-0.262127	T0
21.1848	-0.262689	T0
21.1912	-0.263211	T0
21.1982	-0.263796	T0
21.2052	-0.264306	T0
21.212	-0.264862	T0
21.2191	-0.265365	T0
21.2261	-0.26585	T0
21.2335	-0.266387	T0
21.2402	-0.266912	T0
21.2462	-0.267472	T0
21.2537	-0.268006	T0
21.2607	-0.268566	T0
21.2674	-0.269127	T0
21.2749	-0.269734	T0
21.2815	-0.270215	T0
21.2886	-0.270708	T0
21.2964	-0.271245	T0
21.3034	-0.271783	T0
21.3102	-0.272328	T0
21.3168	-0.272824	T0
21.3243	-0.273366	T0
21.3312	-0.273887	T0
21.338	-0.274313	T0
21.345	-0.274846	T0
21.3522	-0.275288	T0
21.359	-0.27572	T0
21.366	-0.276192	T0
21.3736	-0.276613	T0
21.3807	-0.277093	T0
21.3874	-0.277653	T0
21.3944	-0.278135	T0
21.4017	-0.27859	T0
21.4087	-0.279066	T0
21.416	-0.279522	T0
21.4238	-0.279945	T0
21.4303	-0.280259	T0
21.4377	-0.280701	T0
21.4447	-0.281144	T0
21.4526	-0.281644	T0
21.4595	-0.282127	T0
21.467	-0.282555	T0
21.4742	-0.283006	T0
21.481	-0.283478	T0
21.4882	-0.283901	T0
21.4959	-0.284319	T0
21.503	-0.284681	T0
21.5094	-0.285111	T0
21.5175	-0.285514	T0
21.5245	-0.285907	T0
21.5315	-0.286317	T0
21.5391	-0.28671	T0
21.5464	-0.287025	T0
21.5538	-0.287459	T0
21.5605	-0.287923	T0
21.5681	-0.288284	T0
21.5753	-0.288669	T0
21.5827	-0.289083	T0
21.5901	-0.289541	T0
21.597	-0.290048	T0
21.6044	-0.29036	T0
21.612	-0.290735	T0
21.6193	-0.291123	T0
21.6264	-0.291517	T0
21.6339	-0.291912	T0
21.6415	-0.292304	T0
21.6486	-0.292668	T0
21.6557	-0.293014	T0
21.6635	-0.293337	T0
21.6709	-0.293664	T0
21.6783	-0.294097	T0
21.6855	-0.294378	T0
21.6934	-0.294744	T0
21.7005	-0.295131	T0
21.7085	-0.295565	T0
21.7157	-0.295954	T0
21.7235	-0.296339	T0
21.7305	-0.296721	T0
21.7378	-0.297074	T0
21.7451	-0.297348	T0
21.7526	-0.297586	T0
21.7601	-0.297926	T0
21.7676	-0.298217	T0
21.7756	-0.298553	T0
21.7829	-0.298923	T0
21.7899	-0.299288	T0
21.7972	-0.299638	T0
21.8044	-0.30001	T0
21.8124	-0.300394	T0
21.8198	-0.300743	T0
21.8272	-0.301021	T0
21.8351	-0.301305	T0
21.8427	-0.301567	T0
21.8494	-0.301851	T0
21.8573	-0.302186	T0
21.8647	-0.302503	T0
21.8729	-0.302793	T0
21.8801	-0.303015	T0
21.8874	-0.303288	T0
21.895	-0.303532	T0
21.9024	-0.303869	T0
21.9103	-0.304188	T0
21.9175	-0.304544	T0
21.925	-0.304804	T0
21.9327	-0.30511	T0
21.9407	-0.305413	T0
21.948	-0.30575	T0
21.955	-0.306095	T0
21.9633	-0.306334	T0
21.9705	-0.306585	T0
21.9777	-0.306891	T0
21.9855	-0.307204	T0
21.9935	-0.307498	T0
22.0011	-0.307737	T0
22.0084	-0.307974	T0
22.0158	-0.308162	T0
22.0237	-0.308427	T0
22.0317	-0.308692	T0
22.0395	-0.308942	T0
22.0468	-0.309148	T0
22.0541	-0.309373	T0
22.0619	-0.309777	T0
22.069	-0.31009	T0
22.0778	-0.310285	T0
22.0849	-0.310533	T0
22.0925	-0.310781	T0
22.1004	-0.310974	T0
22.1076	-0.31126	T0
22.1159	-0.311539	T0
22.1234	-0.311822	T0
22.1306	-0.312089	T0
22.1387	-0.312279	T0
22.1471	-0.312628	T0
22.1546	-0.312919	T0
22.1617	-0.312998	T0
22.1698	-0.313208	T0
22.1768	-0.313451	T0
22.1842	-0.313729	T0
22.1921	-0.314033	T0
22.1994	-0.314228	T0
22.2076	-0.314471	T0
22.2152	-0.314678	T0
22.2234	-0.314857	T0
22.2312	-0.315098	T0
22.2388	-0.315236	T0
22.2462	-0.315285	T0
22.2536	-0.315445	T0
22.2622	-0.31569	T0
22.2702	-0.316041	T0
22.2776	-0.316334	T0
22.2851	-0.316564	T0
22.2929	-0.316832	T0
22.3005	-0.317037	T0
22.3081	-0.317236	T0
22.3162	-0.317457	T0
22.3239	-0.317639	T0
22.3318	-0.317758	T0
22.3388	-0.317936	T0
22.3474	-0.318141	T0
22.3549	-0.318342	T0
22.3628	-0.31858	T0
22.3705	-0.318782	T0
22.3784	-0.319041	T0
22.386	-0.319243	T0
22.3936	-0.319448	T0
22.4018	-0.319689	T0
22.4089	-0.319776	T0
22.4172	-0.319958	T0
22.4244	-0.320108	T0
22.4326	-0.320315	T0
22.4408	-0.320511	T0
22.4484	-0.32067	T0
22.4559	-0.320885	T0
22.464	-0.321113	T0
22.4719	-0.321318	T0
22.4798	-0.321563	T0
22.4869	-0.321798	T0
22.4951	-0.321911	T0
22.5029	-0.322088	T0
22.511	-0.322232	T0
22.5192	-0.322462	T0
22.5269	-0.32268	T0
22.5349	-0.322868	T0
22.5426	-0.323035	T0
22.5507	-0.32318	T0
22.5591	-0.32335	T0
22.5659	-0.323548	T0
22.5738	-0.323738	T0
22.5821	-0.323891	T0
22.5899	-0.324058	T0
22.5977	-0.324105	T0
22.6053	-0.324257	T0
22.6135	-0.324338	T0
22.6207	-0.324448	T0
22.6291	-0.324562	T0
22.637	-0.324732	T0
22.6451	-0.324873	T0
22.6523	-0.325044	T0
22.6599	-0.325132	T0
22.6682	-0.325282	T0
22.6762	-0.325522	T0
22.6842	-0.325733	T0
22.6923	-0.325911	T0
22.7005	-0.3261	T0
22.7078	-0.326237	T0
22.7154	-0.326392	T0
22.7237	-0.326557	T0
22.7318	-0.326747	T0
22.7393	-0.326917	T0
22.7478	-0.327061	T0
22.7557	-0.327178	T0
22.7637	-0.32729	T0
22.7712	-0.327417	T0
22.7795	-0.327571	T0
22.7875	-0.327767	T0
22.7951	-0.327893	T0
22.8025	-0.328003	T0
22.8116	-0.328121	T0
22.8191	-0.328225	T0
22.8272	-0.328341	T0
22.8353	-0.328423	T0
22.8428	-0.328565	T0
22.8509	-0.328644	T0
22.8582	-0.328785	T0
22.8661	-0.328949	T0
22.8747	-0.329126	T0
22.8825	-0.329319	T0
22.89	-0.329503	T0
22.8981	-0.329612	T0
22.9062	-0.329673	T0
22.9139	-0.329769	T0
22.9224	-0.329856	T0
22.9302	-0.329911	T0
22.9381	-0.330003	T0
22.9462	-0.330131	T0
22.9541	-0.330264	T0
22.9623	-0.330445	T0
22.9699	-0.330702	T0
22.9784	-0.330905	T0
22.986	-0.331024	T0
22.9943	-0.331101	T0
23.002	-0.331218	T0
23.0098	-0.331318	T0
23.0177	-0.331392	T0
23.0256	-0.331479	T0
23.0335	-0.331559	T0
23.0414	-0.331632	T0
23.0495	-0.331711	T0
23.058	-0.331852	T0
23.066	-0.332015	T0
23.0735	-0.332163	T0
23.0817	-0.332289	T0
23.0902	-0.332398	T0
23.098	-0.332557	T0
23.1056	-0.332684	T0
23.1136	-0.332822	T0
23.1216	-0.332919	T0
23.1296	-0.333031	T0
23.1371	-0.333128	T0
23.146	-0.333203	T0
23.154	-0.33325	T0
23.1621	-0.333309	T0
23.1699	-0.333393	T0
23.1778	-0.333454	T0
23.1862	-0.333586	T0
23.1946	-0.333695	T0
23.2021	-0.333808	T0
23.2096	-0.333921	T0
23.2173	-0.334053	T0
23.2259	-0.334161	T0
23.2342	-0.334245	T0
23.2424	-0.334303	T0
23.2501	-0.334392	T0
23.2581	-0.33451	T0
23.2661	-0.33461	T0
23.2745	-0.334741	T0
23.2821	-0.334861	T0
23.2912	-0.334972	T0
23.2992	-0.335124	T0
23.3066	-0.335266	T0
23.3143	-0.33538	T0
23.3228	-0.335472	T0
23.3309	-0.335571	T0
23.3383	-0.335643	T0
23.3465	-0.335695	T0
23.355	-0.335768	T0
23.3628	-0.335851	T0
23.371	-0.335945	T0
23.3788	-0.336045	T0
23.3866	-0.336169	T0
23.3954	-0.336267	T0
23.4031	-0.336352	T0
23.4116	-0.33645	T0
23.4192	-0.336549	T0
23.4276	-0.336638	T0
23.4357	-0.33669	T0
23.4442	-0.336757	T0
23.4522	-0.336845	T0
23.46	-0.336929	T0
23.4682	-0.337049	T0
23.4761	-0.337147	T0
23.4845	-0.337228	T0
23.4924	-0.337296	T0
23.5004	-0.337374	T0
23.5077	-0.337456	T0
23.5159	-0.33752	T0
23.5248	-0.337581	T0
23.5329	-0.337675	T0
23.5408	-0.337798	T0
23.5487	-0.337895	T0
23.5569	-0.337996	T0
23.5646	-0.338102	T0
23.5731	-0.338218	T0
23.5817	-0.338313	T0
23.5891	-0.338385	T0
23.5969	-0.338448	T0
23.6058	-0.338496	T0
23.6139	-0.338539	T0
23.6221	-0.338617	T0
23.63	-0.338686	T0
23.6378	-0.33875	T0
23.646	-0.338819	T0
23.6539	-0.338907	T0
23.6625	-0.33899	T0
23.6708	-0.339077	T0
23.6783	-0.339151	T0
23.6865	-0.339216	T0
23.6953	-0.339281	T0
23.7031	-0.339336	T0
23.7112	-0.339386	T0
23.7188	-0.339445	T0
23.7267	-0.339496	T0
23.7353	-0.339539	T0
23.7436	-0.339592	T0
23.7519	-0.339659	T0
23.7603	-0.339731	T0
23.7682	-0.339813	T0
23.7764	-0.339912	T0
23.7843	-0.340021	T0
23.7923	-0.340115	T0
23.8004	-0.340226	T0
23.8086	-0.340321	T0
23.8164	-0.3404	T0
23.8247	-0.340449	T0
23.8328	-0.340499	T0
23.8414	-0.340561	T0
23.8498	-0.340613	T0
23.8576	-0.340664	T0
23.866	-0.34071	T0
23.8743	-0.340768	T0
23.8827	-0.340823	T0
23.8906	-0.340888	T0
23.8987	-0.34095	T0
23.9071	-0.341014	T0
23.9146	-0.341094	T0
23.9231	-0.341178	T0
23.931	-0.341264	T0
23.9393	-0.341337	T0
23.9473	-0.341403	T0
23.9555	-0.341451	T0
23.9633	-0.341496	T0
23.9724	-0.341534	T0
23.9802	-0.341572	T0
23.9883	-0.3416	T0
23.9964	-0.341637	T0
24.0046	-0.341679	T0
24.0134	-0.341729	T0
24.0211	-0.341785	T0
24.0285	-0.341835	T0
24.0374	-0.341876	T0
24.0458	-0.341918	T0
24.0536	-0.341961	T0
24.0614	-0.342022	T0
24.07	-0.342087	T0
24.0781	-0.34215	T0
24.0858	-0.342209	T0
24.0941	-0.34227	T0
24.1029	-0.342337	T0
24.1108	-0.342408	T0
24.1189	-0.342477	T0
24.1274	-0.34255	T0
24.135	-0.342618	T0
24.1427	-0.34268	T0
24.1515	-0.342741	T0
24.1599	-0.342793	T0
24.168	-0.342832	T0
24.176	-0.342857	T0
24.1842	-0.342873	T0
24.192	-0.342886	T0
24.2005	-0.342907	T0
24.209	-0.342928	T0
24.2176	-0.342962	T0
24.2259	-0.343009	T0
24.2337	-0.343064	T0
24.2418	-0.343109	T0
24.2495	-0.343165	T0
24.2577	-0.343226	T0
24.266	-0.343292	T0
24.2745	-0.343351	T0
24.2822	-0.343406	T0
24.291	-0.343459	T0
24.2988	-0.343517	T0
24.3072	-0.343581	T0
24.3152	-0.34363	T0
24.3238	-0.343685	T0
24.3316	-0.34372	T0
24.3403	-0.343751	T0
24.3485	-0.343785	T0
24.3568	-0.34382	T0
24.3648	-0.343854	T0
24.3725	-0.343887	T0
24.3811	-0.34392	T0
24.3893	-0.343963	T0
24.3968	-0.344	T0
24.4054	-0.344027	T0
24.4136	-0.344048	T0
24.4223	-0.344066	T0
24.4303	-0.344084	T0
24.4383	-0.344107	T0
24.4464	-0.344137	T0
24.4548	-0.344186	T0
24.4636	-0.344228	T0
24.4711	-0.344279	T0
24.4796	-0.344332	T0
24.4879	-0.344387	T0
24.496	-0.344444	T0
24.5045	-0.344498	T0
24.513	-0.344545	T0
24.5206	-0.344581	T0
24.5291	-0.344617	T0
24.5374	-0.344642	T0
24.5457	-0.344665	T0
24.5538	-0.344686	T0
24.5614	-0.344705	T0
24.5699	-0.344722	T0
24.5775	-0.34474	T0
24.586	-0.344758	T0
24.5945	-0.344785	T0
24.6024	-0.344816	T0
24.6103	-0.344852	T0
24.6193	-0.344891	T0
24.6276	-0.344926	T0
24.6358	-0.344963	T0
24.6434	-0.345006	T0
24.6522	-0.345043	T0
24.6605	-0.345072	T0
24.6685	-0.345095	T0
24.6766	-0.345111	T0
24.6851	-0.345119	T0
24.6926	-0.345129	T0
24.7009	-0.345139	T0
24.7096	-0.345149	T0
24.7174	-0.345169	T0
24.7258	-0.345203	T0
24.7343	-0.345248	T0
24.7421	-0.345308	T0
24.7506	-0.345376	T0
24.7585	-0.345454	T0
24.7668	-0.345526	T0
24.7754	-0.345575	T0
24.7831	-0.345611	T0
24.7921	-0.345631	T0
24.7996	-0.345646	T0
24.8082	-0.345663	T0
24.8163	-0.345682	T0
24.8239	-0.3457	T0
24.8334	-0.34572	T0
24.8412	-0.34574	T0
24.8496	-0.345767	T0
24.8574	-0.345803	T0
24.8656	-0.345839	T0
24.8744	-0.345869	T0
24.8824	-0.345902	T0
24.8906	-0.345938	T0
24.8988	-0.345976	T0
24.9065	-0.346012	T0
24.9149	-0.346041	T0
24.9236	-0.346077	T0
24.9319	-0.346106	T0
24.9399	-0.346125	T0
24.9481	-0.346141	T0
24.9558	-0.346159	T0
24.9652	-0.346176	T0
24.9726	-0.346192	T0
24.9812	-0.346211	T0
24.9887	-0.346239	T0
24.9977	-0.346268	T0
25.0063	-0.346291	T0
25.0141	-0.34631	T0
25.0227	-0.346338	T0
25.0306	-0.346371	T0
25.0396	-0.346401	T0
25.0472	-0.346433	T0
25.0557	-0.346476	T0
25.0641	-0.346526	T0
25.0726	-0.346576	T0
25.0801	-0.346623	T0
25.0882	-0.346667	T0
25.0964	-0.346699	T0
25.1052	-0.346723	T0
25.1136	-0.346737	T0
25.1218	-0.346751	T0
25.1298	-0.346771	T0
25.1381	-0.346792	T0
25.1466	-0.346814	T0
25.1543	-0.346825	T0
25.1628	-0.346839	T0
25.1702	-0.346859	T0
25.1792	-0.346878	T0
25.1876	-0.3469	T0
25.1952	-0.346925	T0
25.2039	-0.346953	T0
25.212	-0.346974	T0
25.2206	-0.346991	T0
25.2284	-0.34701	T0
25.2372	-0.347025	T0
25.2453	-0.34704	T0
25.2537	-0.347049	T0
25.2617	-0.347068	T0
25.27	-0.347085	T0
25.2782	-0.347104	T0
25.2864	-0.347123	T0
25.2952	-0.347149	T0
25.3035	-0.347179	T0
25.3112	-0.34721	T0
25.3196	-0.347242	T0
25.328	-0.347268	T0
25.3367	-0.34729	T0
25.3445	-0.347306	T0
25.3533	-0.347336	T0
25.3614	-0.347353	T0
25.3692	-0.347374	T0
25.3775	-0.347391	T0
25.3858	-0.347409	T0
25.3936	-0.347429	T0
25.402	-0.347445	T0
25.41	-0.347462	T0
25.4188	-0.347482	T0
25.4275	-0.347498	T0
25.4351	-0.347511	T0
25.4442	-0.347527	T0
25.4522	-0.34754	T0
25.4606	-0.347552	T0
25.4684	-0.347562	T0
25.4769	-0.34757	T0
25.4856	-0.347586	T0
25.4933	-0.347611	T0
25.5017	-0.347636	T0
25.5098	-0.347666	T0
25.5183	-0.347702	T0
25.5267	-0.347733	T0
25.5346	-0.347762	T0
25.5428	-0.347793	T0
25.5517	-0.347823	T0
25.5596	-0.347849	T0
25.5677	-0.347868	T0
25.5765	-0.347882	T0
25.5839	-0.347902	T0
25.5925	-0.347915	T0
25.601	-0.347927	T0
25.6095	-0.347937	T0
25.6175	-0.347943	T0
25.6259	-0.347949	T0
25.6342	-0.347956	T0
25.6429	-0.347969	T0
25.651	-0.34798	T0
25.6592	-0.347992	T0
25.667	-0.348004	T0
25.6754	-0.348015	T0
25.6837	-0.348028	T0
25.6919	-0.348041	T0
25.7004	-0.348054	T0
25.7085	-0.348067	T0
25.7169	-0.348079	T0
25.7256	-0.348086	T0
25.7337	-0.348096	T0
25.7421	-0.348109	T0
25.7502	-0.348122	T0
25.7583	-0.348139	T0
25.7667	-0.348153	T0
25.775	-0.348173	T0
25.7834	-0.348197	T0
25.7917	-0.348227	T0
25.8001	-0.348271	T0
25.8088	-0.348313	T0
25.8162	-0.34834	T0
25.8248	-0.348357	T0
25.8329	-0.348369	T0
25.8419	-0.348386	T0
25.85	-0.3484	T0
25.858	-0.348413	T0
25.8663	-0.34843	T0
25.875	-0.348448	T0
25.8829	-0.34847	T0
25.8912	-0.34849	T0
25.899	-0.348508	T0
25.9073	-0.348523	T0
25.9161	-0.348536	T0
25.9239	-0.348545	T0
25.9325	-0.348559	T0
25.9403	-0.348578	T0
25.9492	-0.34859	T0
25.9575	-0.348605	T0
25.9653	-0.348613	T0
25.974	-0.348624	T0
25.982	-0.348631	T0
25.9904	-0.348644	T0
25.9986	-0.348653	T0
26.007	-0.34866	T0
26.0155	-0.348668	T0
26.0242	-0.348679	T0
26.0327	-0.348691	T0
26.0408	-0.348708	T0
26.049	-0.348721	T0
26.0569	-0.348731	T0
26.065	-0.348742	T0
26.0736	-0.348756	T0
26.0819	-0.348772	T0
26.0895	-0.348783	T0
26.098	-0.348794	T0
26.1068	-0.3488	T0
26.115	-0.34881	T0
26.1239	-0.348817	T0
26.1311	-0.348827	T0
26.1398	-0.348837	T0
26.1478	-0.348848	T0
26.1561	-0.348861	T0
26.1647	-0.348877	T0
26.1735	-0.348896	T0
26.1818	-0.34891	T0
26.1896	-0.348923	T0
26.1981	-0.348934	T0
26.2064	-0.348948	T0
26.2152	-0.348959	T0
26.223	-0.348968	T0
26.2319	-0.348978	T0
26.2396	-0.348985	T0
26.2484	-0.348993	T0
26.2562	-0.349002	T0
26.2646	-0.349014	T0
26.2728	-0.349027	T0
26.2812	-0.349039	T0
26.29	-0.349054	T0
26.2977	-0.349066	T0
26.3057	-0.349073	T0
26.3143	-0.349083	T0
26.322	-0.349103	T0
26.3305	-0.349127	T0
26.3391	-0.349156	T0
26.3475	-0.349183	T0
26.3555	-0.349203	T0
26.3643	-0.349218	T0
26.3719	-0.349231	T0
26.3804	-0.349243	T0
26.3891	-0.349254	T0
26.3969	-0.349263	T0
26.4049	-0.349272	T0
26.4143	-0.34928	T0
26.4224	-0.349287	T0
26.4305	-0.349294	T0
26.4392	-0.349302	T0
26.447	-0.349309	T0
26.4559	-0.349317	T0
26.4643	-0.349324	T0
26.4723	-0.349332	T0
26.4807	-0.349339	T0
26.4891	-0.349346	T0
26.4969	-0.349354	T0
26.505	-0.349363	T0
26.5137	-0.349372	T0
26.5219	-0.349381	T0
26.5304	-0.349391	T0
26.5382	-0.349399	T0
26.5467	-0.349406	T0
26.5549	-0.349414	T0
26.5639	-0.349421	T0
26.5717	-0.349428	T0
26.5804	-0.349436	T0
26.5889	-0.349449	T0
26.5969	-0.349464	T0
26.6053	-0.349481	T0
26.6132	-0.3495	T0
26.622	-0.349517	T0
26.63	-0.349531	T0
26.6381	-0.349548	T0
26.6467	-0.349562	T0
26.655	-0.349571	T0
26.6629	-0.349578	T0
26.6714	-0.349585	T0
26.6793	-0.349593	T0
26.6882	-0.349599	T0
26.6964	-0.349605	T0
26.7047	-0.349611	T0
26.7131	-0.34962	T0
26.7217	-0.349634	T0
26.7293	-0.34965	T0
26.7378	-0.349669	T0
26.7468	-0.349685	T0
26.7546	-0.3497	T0
26.7625	-0.349717	T0
26.7711	-0.349737	T0
26.7791	-0.349753	T0
26.7876	-0.349764	T0
26.7961	-0.349776	T0
26.8041	-0.349782	T0
26.8127	-0.349789	T0
26.8212	-0.349797	T0
26.8295	-0.349804	T0
26.8372	-0.349813	T0
26.8455	-0.34982	T0
26.8541	-0.349827	T0
26.8621	-0.349836	T0
26.8711	-0.349849	T0
26.8786	-0.34986	T0
26.8872	-0.34987	T0
26.8958	-0.349878	T0
26.9037	-0.349884	T0
26.9122	-0.349891	T0
26.9205	-0.349897	T0
26.9289	-0.349904	T0
26.9368	-0.349913	T0
26.9459	-0.349926	T0
26.9543	-0.349942	T0
26.9627	-0.349955	T0
26.9712	-0.349964	T0
26.9787	-0.349972	T0
26.9871	-0.349978	T0
26.9958	-0.349985	T0
27.0044	-0.349993	T0
27.0126	-0.350006	T0
27.021	-0.350023	T0
27.0292	-0.350035	T0
27.0375	-0.350045	T0
27.0452	-0.350054	T0
27.0538	-0.350061	T0
27.0618	-0.350068	T0
27.0698	-0.350076	T0
27.0785	-0.350082	T0
27.0871	-0.350088	T0
27.0955	-0.350095	T0
27.1039	-0.350102	T0
27.1122	-0.350108	T0
27.1205	-0.350115	T0
27.1286	-0.350121	T0
27.1372	-0.350128	T0
27.1452	-0.350134	T0
27.1534	-0.35014	T0
27.1614	-0.350146	T0
27.17	-0.350154	T0
27.1786	-0.350163	T0
27.1871	-0.350171	T0
27.1948	-0.350178	T0
27.2036	-0.350185	T0
27.212	-0.350191	T0
27.2198	-0.350197	T0
27.2281	-0.350202	T0
27.2368	-0.350208	T0
27.2454	-0.350212	T0
27.2533	-0.350218	T0
27.2623	-0.350226	T0
27.2705	-0.350241	T0
27.2787	-0.350264	T0
27.2862	-0.350292	T0
27.2947	-0.350318	T0
27.3029	-0.350337	T0
27.3112	-0.350353	T0
27.3202	-0.350368	T0
27.3285	-0.350376	T0
27.3366	-0.350382	T0
27.345	-0.350388	T0
27.3529	-0.350394	T0
27.3615	-0.350399	T0
27.3702	-0.350405	T0
27.3784	-0.350411	T0
27.3857	-0.350416	T0
27.3942	-0.350422	T0
27.4031	-0.350428	T0
27.4116	-0.350435	T0
27.4197	-0.350441	T0
27.4281	-0.350449	T0
27.4359	-0.350456	T0
27.4453	-0.350462	T0
27.4529	-0.350469	T0
27.4618	-0.350474	T0
27.4699	-0.35048	T0
27.478	-0.350486	T0
27.487	-0.350491	T0
27.4957	-0.350497	T0
27.5035	-0.350503	T0
27.5118	-0.350509	T0
27.5198	-0.350517	T0
27.5281	-0.350525	T0
27.5364	-0.350535	T0
27.5446	-0.350544	T0
27.5528	-0.350551	T0
27.5614	-0.350556	T0
27.5695	-0.350561	T0
27.5776	-0.350566	T0
27.5865	-0.350572	T0
27.595	-0.350582	T0
27.6032	-0.350594	T0
27.6111	-0.350603	T0
27.6197	-0.350609	T0
27.6279	-0.350615	T0
27.6363	-0.350622	T0
27.6442	-0.350628	T0
27.6524	-0.350635	T0
27.6612	-0.35064	T0
27.6695	-0.350646	T0
27.6783	-0.350651	T0
27.6865	-0.350657	T0
27.6948	-0.350663	T0
27.7031	-0.350669	T0
27.7111	-0.350675	T0
27.7198	-0.350681	T0
27.7276	-0.350687	T0
27.7361	-0.350693	T0
27.744	-0.350699	T0
27.7523	-0.350706	T0
27.7606	-0.350712	T0
27.769	-0.350718	T0
27.7778	-0.350724	T0
27.7863	-0.35073	T0
27.7944	-0.350735	T0
27.8029	-0.35074	T0
27.8109	-0.350745	T0
27.8197	-0.35075	T0
27.8276	-0.350755	T0
27.8363	-0.35076	T0
27.8443	-0.350766	T0
27.8528	-0.350773	T0
27.861	-0.350779	T0
27.8693	-0.350788	T0
27.8774	-0.350797	T0
27.8861	-0.350803	T0
27.8942	-0.350809	T0
27.9026	-0.350815	T0
27.9113	-0.35082	T0
27.9193	-0.350826	T0
27.9274	-0.350831	T0
27.9354	-0.350838	T0
27.9437	-0.350843	T0
27.9522	-0.350848	T0
27.9606	-0.350854	T0
27.969	-0.35086	T0
27.9774	-0.350865	T0
27.986	-0.350871	T0
27.9939	-0.350876	T0
28.0027	-0.350881	T0
28.0119	-0.350886	T0
28.0194	-0.350891	T0
28.0276	-0.350896	T0
28.0357	-0.350901	T0
28.0441	-0.350906	T0
28.0525	-0.35091	T0
28.0608	-0.350915	T0
28.0685	-0.35092	T0
28.0776	-0.350926	T0
28.0861	-0.350931	T0
28.094	-0.350937	T0
28.1023	-0.350942	T0
28.1109	-0.350948	T0
28.1192	-0.350953	T0
28.128	-0.350958	T0
28.1356	-0.350963	T0
28.1441	-0.350968	T0
28.1532	-0.350972	T0
28.1611	-0.350977	T0
28.1693	-0.350982	T0
28.1782	-0.350988	T0
28.1861	-0.350993	T0
28.1945	-0.350997	T0
28.2027	-0.351001	T0
28.2101	-0.351005	T0
28.2193	-0.351008	T0
28.2273	-0.351013	T0
28.2355	-0.351017	T0
28.2442	-0.351022	T0
28.252	-0.351027	T0
28.2603	-0.351031	T0
28.2686	-0.351037	T0
28.2772	-0.351043	T0
28.286	-0.351048	T0
28.2939	-0.351052	T0
28.3027	-0.351057	T0
28.3102	-0.351062	T0
28.3189	-0.351066	T0
28.3275	-0.351071	T0
28.3359	-0.351076	T0
28.3444	-0.351081	T0
28.3524	-0.351086	T0
28.3608	-0.351091	T0
28.3692	-0.351097	T0
28.3773	-0.351103	T0
28.3861	-0.351108	T0
28.3935	-0.351113	T0
28.4024	-0.351118	T0
28.4103	-0.351122	T0
28.4189	-0.351125	T0
28.4277	-0.351129	T0
28.4353	-0.351133	T0
28.4437	-0.351137	T0
28.4522	-0.351141	T0
28.4607	-0.351145	T0
28.4696	-0.35115	T0
28.478	-0.351155	T0
28.4861	-0.35116	T0
28.4942	-0.351164	T0
28.5024	-0.351169	T0
28.5105	-0.351173	T0
28.5188	-0.351178	T0
28.5266	-0.351185	T0
28.5354	-0.351193	T0
28.5443	-0.3512	T0
28.5522	-0.351205	T0
28.5605	-0.351209	T0
28.569	-0.351214	T0
28.5773	-0.351218	T0
28.5858	-0.351222	T0
28.5938	-0.351227	T0
28.6022	-0.351231	T0
28.6109	-0.351236	T0
28.6191	-0.351241	T0
28.6268	-0.351247	T0
28.6361	-0.351255	T0
28.6438	-0.351264	T0
28.6528	-0.35127	T0
28.6613	-0.351275	T0
28.669	-0.35128	T0
28.6778	-0.351286	T0
28.6858	-0.351294	T0
28.6944	-0.351304	T0
28.7028	-0.351312	T0
28.7107	-0.35132	T0
28.7197	-0.351326	T0
28.7276	-0.35133	T0
28.7358	-0.351334	T0
28.7443	-0.351338	T0
28.7523	-0.351341	T0
28.7604	-0.351345	T0
28.7686	-0.351348	T0
28.777	-0.351352	T0
28.7856	-0.351355	T0
28.7943	-0.351359	T0
28.8025	-0.351363	T0
28.8112	-0.351367	T0
28.8193	-0.351372	T0
28.8278	-0.351376	T0
28.8365	-0.35138	T0
28.8437	-0.351386	T0
28.8532	-0.351391	T0
28.861	-0.351396	T0
28.869	-0.351402	T0
28.8776	-0.351407	T0
28.8861	-0.351412	T0
28.8945	-0.351417	T0
28.9026	-0.351421	T0
28.9106	-0.351426	T0
28.9193	-0.35143	T0
28.9281	-0.351434	T0
28.9366	-0.351438	T0
28.9446	-0.351441	T0
28.9531	-0.351445	T0
28.9613	-0.351449	T0
28.9694	-0.351453	T0
28.9772	-0.351457	T0
28.9861	-0.351462	T0
28.9941	-0.351465	T0
29.0025	-0.351469	T0
29.0107	-0.351473	T0
29.0193	-0.351478	T0
29.027	-0.351483	T0
29.0356	-0.351487	T0
29.044	-0.351492	T0
29.0524	-0.351498	T0
29.0606	-0.351503	T0
29.0691	-0.351508	T0
29.078	-0.351512	T0
29.0856	-0.351516	T0
29.0945	-0.35152	T0
29.1025	-0.351524	T0
29.1109	-0.351528	T0
29.1196	-0.351531	T0
29.128	-0.351535	T0
29.1363	-0.351538	T0
29.1438	-0.351541	T0
29.1525	-0.351546	T0
29.1608	-0.35155	T0
29.1696	-0.351553	T0
29.1779	-0.351557	T0
29.1862	-0.35156	T0
29.1947	-0.351564	T0
29.203	-0.351568	T0
29.2112	-0.351572	T0
29.2191	-0.351575	T0
29.2276	-0.351579	T0
29.2361	-0.351582	T0
29.2448	-0.351585	T0
29.2523	-0.351588	T0
29.2605	-0.351592	T0
29.2696	-0.351596	T0
29.2776	-0.3516	T0
29.2856	-0.351604	T0
29.2941	-0.351608	T0
29.3021	-0.351611	T0
29.3104	-0.351615	T0
29.319	-0.351618	T0
29.3269	-0.351622	T0
29.3356	-0.351625	T0
29.3435	-0.35163	T0
29.3521	-0.351633	T0
29.3603	-0.351636	T0
29.3694	-0.35164	T0
29.3772	-0.351643	T0
29.386	-0.351646	T0
29.3942	-0.351648	T0
29.403	-0.351651	T0
29.4107	-0.351654	T0
29.4199	-0.351657	T0
29.4275	-0.35166	T0
29.4357	-0.351664	T0
29.4438	-0.351668	T0
29.4523	-0.351672	T0
29.4606	-0.351675	T0
29.469	-0.351679	T0
29.4772	-0.351683	T0
29.4859	-0.351686	T0
29.4936	-0.35169	T0
29.5029	-0.351692	T0
29.5107	-0.351696	T0
29.5193	-0.351699	T0
29.5273	-0.351701	T0
29.5362	-0.351705	T0
29.5439	-0.351708	T0
29.5529	-0.351712	T0
29.5607	-0.351714	T0
29.5689	-0.351718	T0
29.5776	-0.351721	T0
29.5861	-0.351725	T0
29.5949	-0.351727	T0
29.6029	-0.351729	T0
29.6111	-0.351732	T0
29.6193	-0.351734	T0
29.6272	-0.351736	T0
29.636	-0.351737	T0
29.6438	-0.351739	T0
29.6528	-0.351741	T0
29.6607	-0.351744	T0
29.669	-0.351747	T0
29.678	-0.35175	T0
29.6858	-0.351754	T0
29.6944	-0.351758	T0
29.7027	-0.351762	T0
29.7114	-0.351767	T0
29.7196	-0.351771	T0
29.728	-0.351775	T0
29.736	-0.351777	T0
29.744	-0.35178	T0
29.7529	-0.351783	T0
29.761	-0.351786	T0
29.7691	-0.351789	T0
29.7774	-0.351791	T0
29.7858	-0.351794	T0
29.794	-0.351796	T0
29.8026	-0.351798	T0
29.8106	-0.3518	T0
29.819	-0.351801	T0
29.8275	-0.351802	T0
29.8359	-0.351804	T0
29.8442	-0.351806	T0
29.8526	-0.351809	T0
29.8615	-0.351811	T0
29.8694	-0.351814	T0
29.8781	-0.351817	T0
29.886	-0.35182	T0
29.8943	-0.351822	T0
29.9027	-0.351824	T0
29.9118	-0.351827	T0
29.92	-0.351829	T0
29.9279	-0.351831	T0
29.9366	-0.351833	T0
29.9446	-0.351836	T0
29.9531	-0.351839	T0
29.9608	-0.351842	T0
29.9697	-0.351845	T0
29.9784	-0.351849	T0
29.9861	-0.351851	T0
29.9949	-0.351854	T0
30.0033	-0.351857	T0
30.0114	-0.35186	T0
30.0195	-0.351863	T0
30.0279	-0.351866	T0
30.0361	-0.351869	T0
30.0447	-0.351871	T0
30.0527	-0.351874	T0
30.0614	-0.351877	T0
30.0696	-0.351879	T0
30.0773	-0.351881	T0
30.0861	-0.351883	T0
30.0948	-0.351885	T0
30.1034	-0.351887	T0
30.1115	-0.35189	T0
30.1197	-0.351892	T0
30.1284	-0.351894	T0
30.1363	-0.351895	T0
30.1446	-0.351897	T0
30.1531	-0.351899	T0
30.1608	-0.351901	T0
30.1689	-0.351903	T0
30.1777	-0.351903	T0
30.1863	-0.351905	T0
30.1947	-0.351907	T0
30.2035	-0.351909	T0
30.2118	-0.351911	T0
30.2202	-0.351913	T0
30.2285	-0.351915	T0
30.2365	-0.351917	T0
30.2448	-0.35192	T0
30.2535	-0.351922	T0
30.261	-0.351923	T0
30.2696	-0.351924	T0
30.2777	-0.351926	T0
30.2868	-0.351927	T0
30.2941	-0.351929	T0
30.303	-0.35193	T0
30.3115	-0.351931	T0
30.3197	-0.351933	T0
30.3286	-0.351935	T0
30.3369	-0.351937	T0
30.3447	-0.35194	T0
30.3533	-0.351942	T0
30.3618	-0.351944	T0
30.3696	-0.351946	T0
30.3777	-0.351949	T0
30.386	-0.351952	T0
30.3942	-0.351956	T0
30.4032	-0.351959	T0
30.4112	-0.351962	T0
30.4196	-0.351965	T0
30.4277	-0.351966	T0
30.4364	-0.351968	T0
30.4454	-0.351969	T0
30.4534	-0.35197	T0
30.4619	-0.351971	T0
30.4703	-0.351972	T0
30.4781	-0.351973	T0
30.4867	-0.351976	T0
30.4948	-0.351978	T0
30.5036	-0.35198	T0
30.5117	-0.351983	T0
30.52	-0.351985	T0
30.5288	-0.351988	T0
30.5367	-0.35199	T0
30.5449	-0.351993	T0
30.5531	-0.351994	T0
30.5614	-0.351996	T0
30.5706	-0.351997	T0
30.578	-0.351998	T0
30.5866	-0.351999	T0
30.5954	-0.352	T0
30.6034	-0.352002	T0
30.6112	-0.352003	T0
30.6198	-0.352005	T0
30.6282	-0.352007	T0
30.6369	-0.352009	T0
30.6452	-0.352011	T0
30.6534	-0.352013	T0
30.6617	-0.352014	T0
30.6694	-0.352016	T0
30.6781	-0.352016	T0
30.6864	-0.352017	T0
30.6947	-0.352018	T0
30.7036	-0.352019	T0
30.7117	-0.35202	T0
30.7197	-0.352021	T0
30.728	-0.352023	T0
30.7363	-0.352024	T0
30.745	-0.352027	T0
30.7535	-0.352028	T0
30.7614	-0.35203	T0
30.7701	-0.352031	T0
30.7785	-0.352033	T0
30.7865	-0.352034	T0
30.7945	-0.352036	T0
30.8033	-0.352038	T0
30.8116	-0.35204	T0
30.82	-0.352042	T0
30.8284	-0.352043	T0
30.8368	-0.352044	T0
30.8453	-0.352046	T0
30.8541	-0.352046	T0
30.8619	-0.352047	T0
30.8702	-0.352047	T0
30.8786	-0.352049	T0
30.8871	-0.35205	T0
30.8951	-0.352051	T0
30.9041	-0.352052	T0
30.9116	-0.352054	T0
30.9203	-0.352055	T0
30.9289	-0.352057	T0
30.9368	-0.352058	T0
30.945	-0.352059	T0
30.9532	-0.352059	T0
30.9621	-0.35206	T0
30.9703	-0.35206	T0
30.9784	-0.352061	T0
30.9868	-0.352062	T0
30.996	-0.352061	T0
31.0032	-0.352061	T0
31.0117	-0.352062	T0
31.0202	-0.352062	T0
31.0282	-0.352064	T0
31.0367	-0.352065	T0
31.0453	-0.352067	T0
31.0537	-0.352069	T0
31.0618	-0.352071	T0
31.0704	-0.352074	T0
31.0788	-0.352076	T0
31.0874	-0.352077	T0
31.0956	-0.352079	T0
31.1037	-0.35208	T0
31.1117	-0.352081	T0
31.1208	-0.352083	T0
31.129	-0.352084	T0
31.1375	-0.352086	T0
31.1457	-0.352089	T0
31.154	-0.352091	T0
31.1625	-0.352094	T0
31.17	-0.352096	T0
31.1785	-0.352098	T0
31.187	-0.352099	T0
31.1953	-0.352101	T0
31.2035	-0.352102	T0
31.2118	-0.352103	T0
31.2201	-0.352104	T0
31.2284	-0.352104	T0
31.2373	-0.352105	T0
31.2461	-0.352105	T0
31.2545	-0.352106	T0
31.2626	-0.352107	T0
31.2711	-0.352109	T0
31.2792	-0.352111	T0
31.2874	-0.352112	T0
31.296	-0.352114	T0
31.3043	-0.352116	T0
31.3123	-0.352117	T0
31.3207	-0.352118	T0
31.3294	-0.352119	T0
31.3371	-0.352119	T0
31.3458	-0.35212	T0
31.3544	-0.352119	T0
31.3626	-0.352119	T0
31.3704	-0.352118	T0
31.3792	-0.352118	T0
31.3877	-0.352117	T0
31.3958	-0.352118	T0
31.4041	-0.352118	T0
31.4127	-0.352119	T0
31.4211	-0.352121	T0
31.4291	-0.352122	T0
31.4378	-0.352125	T0
31.4462	-0.352127	T0
31.4544	-0.352129	T0
31.4625	-0.352131	T0
31.4708	-0.352132	T0
31.4792	-0.352133	T0
31.4874	-0.352134	T0
31.496	-0.352135	T0
31.5041	-0.352136	T0
31.5126	-0.352137	T0
31.5209	-0.352138	T0
31.5295	-0.352139	T0
31.5378	-0.352139	T0
31.5463	-0.352139	T0
31.5544	-0.35214	T0
31.5635	-0.352139	T0
31.571	-0.352139	T0
31.58	-0.35214	T0
31.5877	-0.352139	T0
31.5964	-0.352139	T0
31.6043	-0.35214	T0
31.6126	-0.35214	T0
31.621	-0.352142	T0
31.6294	-0.352143	T0
31.6376	-0.352145	T0
31.6463	-0.352146	T0
31.6549	-0.352147	T0
31.6622	-0.352149	T0
31.6712	-0.352151	T0
31.6788	-0.352151	T0
31.6878	-0.352152	T0
31.6963	-0.352152	T0
31.7037	-0.352151	T0
31.7127	-0.352151	T0
31.7218	-0.35215	T0
31.7294	-0.352149	T0
31.7377	-0.352149	T0
31.7462	-0.352149	T0
31.7544	-0.352149	T0
31.7625	-0.35215	T0
31.7713	-0.352152	T0
31.78	-0.352153	T0
31.788	-0.352154	T0
31.7966	-0.352156	T0
31.8045	-0.352156	T0
31.8126	-0.352157	T0
31.821	-0.352157	T0
31.8292	-0.352158	T0
31.8375	-0.352157	T0
31.8456	-0.352157	T0
31.8538	-0.352156	T0
31.8627	-0.352156	T0
31.8702	-0.352155	T0
31.8789	-0.352156	T0
31.8871	-0.352155	T0
31.8959	-0.352155	T0
31.9042	-0.352155	T0
31.9131	-0.352155	T0
31.9212	-0.352155	T0
31.9297	-0.352155	T0
31.9373	-0.352155	T0
31.9461	-0.352155	T0
31.9545	-0.352155	T0
31.9629	-0.352156	T0
31.9707	-0.352157	T0
31.9792	-0.352158	T0
31.9877	-0.352159	T0
31.9957	-0.352159	T0
32.0042	-0.35216	T0
32.0126	-0.352161	T0
32.0214	-0.352161	T0
32.0297	-0.352161	T0
32.0383	-0.352161	T0
32.0462	-0.352161	T0
32.0549	-0.352162	T0
32.0628	-0.352162	T0
32.0712	-0.352161	T0
32.0798	-0.352161	T0
32.0877	-0.352161	T0
32.0959	-0.352162	T0
32.1047	-0.352163	T0
32.1132	-0.352165	T0
32.1212	-0.352166	T0
32.1298	-0.352168	T0
32.1378	-0.352172	T0
32.1466	-0.352173	T0
32.155	-0.352174	T0
32.1637	-0.352175	T0
32.1721	-0.352176	T0
32.1802	-0.352178	T0
32.1886	-0.352179	T0
32.197	-0.35218	T0
32.205	-0.352182	T0
32.2131	-0.352183	T0
32.221	-0.352184	T0
32.2297	-0.352184	T0
32.2381	-0.352184	T0
32.2463	-0.352184	T0
32.2547	-0.352185	T0
32.2634	-0.352184	T0
32.2715	-0.352185	T0
32.28	-0.352186	T0
32.2882	-0.352187	T0
32.2967	-0.352189	T0
32.3046	-0.352192	T0
32.3134	-0.352194	T0
32.3218	-0.352196	T0
32.33	-0.352199	T0
32.3383	-0.352202	T0
32.347	-0.352204	T0
32.355	-0.352206	T0
32.3632	-0.352209	T0
32.3717	-0.352211	T0
32.3798	-0.352213	T0
32.3882	-0.352214	T0
32.3969	-0.352215	T0
32.4043	-0.352215	T0
32.4128	-0.352216	T0
32.4215	-0.352216	T0
32.4295	-0.352217	T0
32.438	-0.352218	T0
32.447	-0.352219	T0
32.4552	-0.35222	T0
32.4631	-0.352221	T0
32.471	-0.352223	T0
32.4798	-0.352224	T0
32.4883	-0.352225	T0
32.497	-0.352226	T0
32.5056	-0.352227	T0
32.5132	-0.352228	T0
32.5223	-0.352229	T0
32.5301	-0.35223	T0
32.5389	-0.352231	T0
32.5469	-0.352232	T0
32.5552	-0.352233	T0
32.5632	-0.352233	T0
32.5714	-0.352233	T0
32.5799	-0.352234	T0
32.5888	-0.352235	T0
32.5962	-0.352237	T0
32.6048	-0.352238	T0
32.613	-0.35224	T0
32.6221	-0.352242	T0
32.6304	-0.352244	T0
32.6388	-0.352246	T0
32.6471	-0.352248	T0
32.6553	-0.352249	T0
32.6642	-0.352251	T0
32.6718	-0.352252	T0
32.6798	-0.352253	T0
32.6885	-0.352255	T0
32.6966	-0.352255	T0
32.7052	-0.352256	T0
32.7134	-0.352256	T0
32.7219	-0.352257	T0
32.7303	-0.352257	T0
32.7392	-0.352258	T0
32.7472	-0.352258	T0
32.7553	-0.352259	T0
32.7641	-0.35226	T0
32.7722	-0.352262	T0
32.7805	-0.352264	T0
32.7888	-0.352265	T0
32.7971	-0.352267	T0
32.8052	-0.352268	T0
32.8138	-0.352269	T0
32.8227	-0.35227	T0
32.8309	-0.352271	T0
32.8386	-0.352272	T0
32.8474	-0.352273	T0
32.8554	-0.352274	T0
32.8637	-0.352276	T0
32.8726	-0.352277	T0
32.8802	-0.352278	T0
32.8888	-0.35228	T0
32.8971	-0.352282	T0
32.9052	-0.352284	T0
32.9141	-0.352286	T0
32.9228	-0.352288	T0
32.9309	-0.35229	T0
32.9387	-0.352291	T0
32.9473	-0.352292	T0
32.9558	-0.352292	T0
32.9641	-0.352293	T0
32.9726	-0.352293	T0
32.9808	-0.352293	T0
32.9892	-0.352293	T0
32.9967	-0.352292	T0
33.0058	-0.352292	T0
33.0138	-0.352293	T0
33.0218	-0.352293	T0
33.0301	-0.352293	T0
33.0385	-0.352293	T0
33.0473	-0.352293	T0
33.0553	-0.352293	T0
33.0639	-0.352293	T0
33.072	-0.352293	T0
33.0805	-0.352293	T0
33.089	-0.352293	T0
33.0972	-0.352294	T0
33.1058	-0.352296	T0
33.1146	-0.352297	T0
33.1219	-0.352299	T0
33.1307	-0.352301	T0
33.1397	-0.352302	T0
33.147	-0.352303	T0
33.1558	-0.352302	T0
33.1641	-0.352302	T0
33.1726	-0.352301	T0
33.1806	-0.3523	T0
33.189	-0.352299	T0
33.1974	-0.352298	T0
33.2055	-0.352297	T0
33.2143	-0.352296	T0
33.2229	-0.352296	T0
33.2308	-0.352296	T0
33.2398	-0.352296	T0
33.2472	-0.352296	T0
33.2557	-0.352296	T0
33.2643	-0.352296	T0
33.2724	-0.352297	T0
33.2804	-0.352298	T0
33.2888	-0.352299	T0
33.2975	-0.352299	T0
33.3061	-0.352299	T0
33.3142	-0.352299	T0
33.3224	-0.352298	T0
33.331	-0.352298	T0
33.3388	-0.352297	T0
33.3476	-0.352297	T0
33.3564	-0.352296	T0
33.3649	-0.352296	T0
33.3728	-0.352296	T0
33.3805	-0.352295	T0
33.389	-0.352296	T0
33.3971	-0.352297	T0
33.4052	-0.352297	T0
33.4142	-0.352299	T0
33.4222	-0.352299	T0
33.4308	-0.352301	T0
33.4392	-0.352301	T0
33.4475	-0.352301	T0
33.4556	-0.3523	T0
33.4641	-0.3523	T0
33.4725	-0.352299	T0
33.4808	-0.352298	T0
33.4895	-0.352298	T0
33.4976	-0.352299	T0
33.5061	-0.3523	T0
33.514	-0.352301	T0
33.5227	-0.352302	T0
33.5312	-0.352302	T0
33.5391	-0.352302	T0
33.5476	-0.352303	T0
33.556	-0.352303	T0
33.5638	-0.352303	T0
33.5727	-0.352303	T0
33.5811	-0.352303	T0
33.5896	-0.352303	T0
33.5978	-0.352303	T0
33.6062	-0.352303	T0
33.6143	-0.352303	T0
33.6228	-0.352303	T0
33.631	-0.352302	T0
33.6394	-0.352301	T0
33.6482	-0.352301	T0
33.6563	-0.352301	T0
33.6642	-0.352302	T0
33.6725	-0.352302	T0
33.6811	-0.352303	T0
33.6896	-0.352303	T0
33.6977	-0.352304	T0
33.7062	-0.352305	T0
33.7144	-0.352306	T0
33.723	-0.352306	T0
33.7318	-0.352306	T0
33.74	-0.352306	T0
33.7483	-0.352306	T0
33.7561	-0.352305	T0
33.7646	-0.352305	T0
33.7727	-0.352303	T0
33.7813	-0.352303	T0
33.7896	-0.352302	T0
33.7977	-0.352301	T0
33.8059	-0.352302	T0
33.8149	-0.352301	T0
33.8234	-0.352302	T0
33.8314	-0.352302	T0
33.8397	-0.352303	T0
33.8482	-0.352304	T0
33.8558	-0.352305	T0
33.8645	-0.352304	T0
33.8729	-0.352305	T0
33.8809	-0.352305	T0
33.8895	-0.352306	T0
33.8973	-0.352307	T0
33.9061	-0.352308	T0
33.9142	-0.352309	T0
33.9229	-0.35231	T0
33.931	-0.35231	T0
33.9398	-0.352311	T0
33.948	-0.352311	T0
33.9569	-0.352311	T0
33.9649	-0.35231	T0
33.9732	-0.352309	T0
33.9817	-0.352309	T0
33.9896	-0.352309	T0
33.9978	-0.352308	T0
34.0062	-0.352308	T0
34.0147	-0.352309	T0
34.023	-0.352309	T0
34.0315	-0.352309	T0
34.0402	-0.352309	T0
34.0482	-0.35231	T0
34.0565	-0.352309	T0
34.0646	-0.352309	T0
34.073	-0.352308	T0
34.0814	-0.352308	T0
34.0894	-0.352307	T0
34.0982	-0.352306	T0
34.1068	-0.352306	T0
34.115	-0.352306	T0
34.1239	-0.352305	T0
34.1314	-0.352305	T0
34.1403	-0.352306	T0
34.1481	-0.352308	T0
34.157	-0.35231	T0
34.1646	-0.352313	T0
34.1733	-0.352315	T0
34.1818	-0.352317	T0
34.1902	-0.352318	T0
34.1983	-0.352319	T0
34.2073	-0.35232	T0
34.215	-0.352322	T0
34.2237	-0.352322	T0
34.232	-0.352323	T0
34.2401	-0.352325	T0
34.2483	-0.352326	T0
34.2566	-0.352327	T0
34.2645	-0.352328	T0
34.2736	-0.352329	T0
34.2823	-0.35233	T0
34.2907	-0.352331	T0
34.2987	-0.352332	T0
34.3078	-0.352333	T0
34.3155	-0.352334	T0
34.3242	-0.352334	T0
34.3319	-0.352335	T0
34.3405	-0.352334	T0
34.3483	-0.352332	T0
34.3567	-0.35233	T0
34.3647	-0.352329	T0
34.3733	-0.352329	T0
34.3819	-0.35233	T0
34.3903	-0.35233	T0
34.3986	-0.352331	T0
34.4072	-0.352331	T0
34.4158	-0.352332	T0
34.424	-0.352333	T0
34.4328	-0.352335	T0
34.4407	-0.352336	T0
34.4493	-0.352337	T0
34.4568	-0.352337	T0
34.4652	-0.352339	T0
34.4741	-0.352339	T0
34.4828	-0.35234	T0
34.4907	-0.35234	T0
34.499	-0.352341	T0
34.5074	-0.352341	T0
34.5155	-0.352341	T0
34.5235	-0.352342	T0
34.5318	-0.352343	T0
34.5404	-0.352344	T0
34.5487	-0.352346	T0
34.5571	-0.352346	T0
34.5654	-0.352347	T0
34.574	-0.352347	T0
34.5822	-0.352347	T0
34.5903	-0.352348	T0
34.5992	-0.352349	T0
34.6074	-0.35235	T0
34.6153	-0.352351	T0
34.6242	-0.352352	T0
34.6323	-0.352354	T0
34.6405	-0.352355	T0
34.6489	-0.352355	T0
34.6572	-0.352356	T0
34.6653	-0.352356	T0
34.6739	-0.352356	T0
34.6824	-0.352357	T0
34.6907	-0.352357	T0
34.6993	-0.352358	T0
34.707	-0.352358	T0
34.7155	-0.352359	T0
34.7239	-0.35236	T0
34.7328	-0.35236	T0
34.7408	-0.352361	T0
34.7497	-0.352362	T0
34.7577	-0.352363	T0
34.7656	-0.352364	T0
34.7738	-0.352365	T0
34.7825	-0.352366	T0
34.7908	-0.352367	T0
34.7994	-0.352368	T0
34.8072	-0.35237	T0
34.8159	-0.352371	T0
34.8238	-0.352372	T0
34.8326	-0.352372	T0
34.8408	-0.352373	T0
34.8494	-0.352374	T0
34.8577	-0.352373	T0
34.8661	-0.352374	T0
34.8746	-0.352373	T0
34.8819	-0.352373	T0
34.8911	-0.352373	T0
34.8993	-0.352374	T0
34.9073	-0.352375	T0
34.916	-0.352376	T0
34.9239	-0.352376	T0
34.9328	-0.352377	T0
34.941	-0.352376	T0
34.9494	-0.352377	T0
34.9575	-0.352377	T0
34.9666	-0.352377	T0
34.9743	-0.352377	T0
34.983	-0.352378	T0
34.9911	-0.352379	T0
34.9991	-0.352381	T0
35.0076	-0.352383	T0
35.0162	-0.352384	T0
35.0242	-0.352384	T0
35.033	-0.352385	T0
35.0414	-0.352385	T0
35.0497	-0.352386	T0
35.0589	-0.352385	T0
35.0663	-0.352385	T0
35.0741	-0.352385	T0
35.0832	-0.352384	T0
35.0907	-0.352385	T0
35.0994	-0.352385	T0
35.1084	-0.352386	T0
35.1157	-0.352387	T0
35.1242	-0.352388	T0
35.1329	-0.352391	T0
35.1417	-0.352393	T0
35.1496	-0.352394	T0
35.1578	-0.352396	T0
35.1665	-0.352397	T0
35.1746	-0.352397	T0
35.1831	-0.352397	T0
35.1911	-0.352397	T0
35.2	-0.352396	T0
35.2084	-0.352395	T0
35.2168	-0.352395	T0
35.2245	-0.352394	T0
35.2337	-0.352394	T0
[truncated: 21,831 more rows]

## Sheet: AavLEA1_Sucrose
Temperature	Heat Flow (Normalized)	Sample
20.0193	-0.015564	S0
20.0196	-0.0155638	S0
20.0194	-0.0155636	S0
20.0201	-0.015563	S0
20.0201	-0.0155625	S0
20.0201	-0.0155621	S0
20.0193	-0.0155615	S0
20.0196	-0.0155611	S0
20.0196	-0.0155604	S0
20.0199	-0.0155597	S0
20.0198	-0.0155593	S0
20.0199	-0.0155593	S0
20.02	-0.0155593	S0
20.0198	-0.0155594	S0
20.0201	-0.0155594	S0
20.0203	-0.0155594	S0
20.0204	-0.0155595	S0
20.0208	-0.0155596	S0
20.0209	-0.0155598	S0
20.0211	-0.0155602	S0
20.021	-0.0155607	S0
20.021	-0.0155613	S0
20.022	-0.0155623	S0
20.0215	-0.0155638	S0
20.0221	-0.0155669	S0
20.0223	-0.0155708	S0
20.023	-0.0155753	S0
20.0231	-0.0155824	S0
20.023	-0.0155908	S0
20.0234	-0.0155994	S0
20.0241	-0.0156074	S0
20.0249	-0.0156183	S0
20.0251	-0.0156313	S0
20.0253	-0.0156533	S0
20.0258	-0.0156873	S0
20.0262	-0.0157347	S0
20.0273	-0.0157828	S0
20.0275	-0.0158517	S0
20.0283	-0.0159484	S0
20.0287	-0.0160749	S0
20.0289	-0.0162319	S0
20.0304	-0.0163981	S0
20.0308	-0.0165937	S0
20.0315	-0.016846	S0
20.0325	-0.0171503	S0
20.0333	-0.0174824	S0
20.034	-0.0178173	S0
20.0353	-0.0181273	S0
20.0371	-0.0184627	S0
20.0375	-0.0188018	S0
20.039	-0.0192086	S0
20.0407	-0.0196192	S0
20.0413	-0.0200867	S0
20.0425	-0.0205647	S0
20.0439	-0.0210588	S0
20.046	-0.0215987	S0
20.0465	-0.0220641	S0
20.0483	-0.022632	S0
20.0497	-0.0231527	S0
20.0512	-0.0236943	S0
20.0527	-0.0242223	S0
20.0545	-0.0248623	S0
20.0563	-0.0255367	S0
20.058	-0.0262238	S0
20.0596	-0.0268974	S0
20.0616	-0.0276747	S0
20.0635	-0.0284023	S0
20.066	-0.0291692	S0
20.0676	-0.0299433	S0
20.0698	-0.0307637	S0
20.072	-0.0315749	S0
20.0742	-0.0323809	S0
20.0758	-0.0332163	S0
20.0782	-0.0341349	S0
20.0806	-0.0350144	S0
20.0828	-0.035958	S0
20.0853	-0.0369188	S0
20.0882	-0.0379326	S0
20.0903	-0.0389997	S0
20.0925	-0.0400928	S0
20.0955	-0.0411738	S0
20.0982	-0.042267	S0
20.1004	-0.0433541	S0
20.1036	-0.0444479	S0
20.1062	-0.0456503	S0
20.1095	-0.0468365	S0
20.1122	-0.0480875	S0
20.116	-0.0493022	S0
20.1183	-0.0505881	S0
20.1219	-0.0518827	S0
20.1247	-0.0531685	S0
20.1271	-0.0544347	S0
20.1302	-0.0557378	S0
20.1337	-0.0570937	S0
20.137	-0.0583944	S0
20.14	-0.0597304	S0
20.1436	-0.0611381	S0
20.1464	-0.0626084	S0
20.15	-0.0640138	S0
20.1537	-0.0654719	S0
20.157	-0.066909	S0
20.161	-0.0683679	S0
20.1645	-0.0698471	S0
20.1686	-0.0713083	S0
20.1718	-0.0727424	S0
20.1751	-0.0742042	S0
20.18	-0.0756331	S0
20.183	-0.0771419	S0
20.1871	-0.0786325	S0
20.1907	-0.0800704	S0
20.194	-0.0815565	S0
20.1978	-0.0830846	S0
20.2021	-0.0846596	S0
20.206	-0.0861353	S0
20.2099	-0.0876741	S0
20.2138	-0.0892128	S0
20.2182	-0.0908563	S0
20.2222	-0.0923518	S0
20.2258	-0.0939298	S0
20.2308	-0.0954047	S0
20.2345	-0.0969076	S0
20.239	-0.0984078	S0
20.2434	-0.0998993	S0
20.2465	-0.101377	S0
20.2512	-0.102941	S0
20.256	-0.104445	S0
20.2598	-0.10598	S0
20.2645	-0.107596	S0
20.2684	-0.109088	S0
20.2738	-0.110631	S0
20.2778	-0.112096	S0
20.2823	-0.113563	S0
20.2867	-0.115003	S0
20.2914	-0.116468	S0
20.2954	-0.117844	S0
20.3	-0.119339	S0
20.3051	-0.12077	S0
20.3101	-0.122302	S0
20.3149	-0.123783	S0
20.319	-0.125287	S0
20.3241	-0.126777	S0
20.3287	-0.128223	S0
20.3333	-0.129667	S0
20.338	-0.131139	S0
20.3431	-0.132544	S0
20.3476	-0.133881	S0
20.3528	-0.135298	S0
20.3574	-0.136631	S0
20.3626	-0.138046	S0
20.3675	-0.139389	S0
20.3723	-0.140698	S0
20.3771	-0.14208	S0
20.3818	-0.143383	S0
20.3871	-0.144773	S0
20.3924	-0.146123	S0
20.3971	-0.14745	S0
20.402	-0.148745	S0
20.4073	-0.150151	S0
20.4129	-0.151468	S0
20.4179	-0.152813	S0
20.4228	-0.15412	S0
20.4281	-0.155384	S0
20.4331	-0.156595	S0
20.4386	-0.157813	S0
20.4441	-0.159069	S0
20.4483	-0.160314	S0
20.4537	-0.161548	S0
20.459	-0.162713	S0
20.4646	-0.164008	S0
20.4702	-0.165274	S0
20.4757	-0.166452	S0
20.481	-0.167656	S0
20.4858	-0.168813	S0
20.4917	-0.170013	S0
20.4971	-0.171232	S0
20.5026	-0.17241	S0
20.5078	-0.173547	S0
20.5133	-0.174651	S0
20.5191	-0.175809	S0
20.5248	-0.177024	S0
20.5299	-0.178142	S0
20.5358	-0.179269	S0
20.5414	-0.180402	S0
20.547	-0.181498	S0
20.5524	-0.182564	S0
20.5579	-0.183688	S0
20.5636	-0.184825	S0
20.5692	-0.185873	S0
20.5755	-0.186941	S0
20.5806	-0.187998	S0
20.5866	-0.189013	S0
20.592	-0.190003	S0
20.5978	-0.191001	S0
20.6034	-0.191969	S0
20.6099	-0.192991	S0
20.6151	-0.193996	S0
20.6208	-0.195059	S0
20.627	-0.196086	S0
20.6325	-0.197107	S0
20.6382	-0.198153	S0
20.6446	-0.199177	S0
20.6502	-0.200155	S0
20.6562	-0.201097	S0
20.662	-0.202078	S0
20.6682	-0.203019	S0
20.6733	-0.203954	S0
20.6801	-0.204942	S0
20.686	-0.205823	S0
20.6915	-0.206822	S0
20.6979	-0.207766	S0
20.7041	-0.208677	S0
20.7096	-0.209565	S0
20.7159	-0.210493	S0
20.7218	-0.21138	S0
20.7284	-0.212272	S0
20.7346	-0.213131	S0
20.7401	-0.214082	S0
20.7471	-0.215	S0
20.7528	-0.215856	S0
20.7591	-0.216772	S0
20.7652	-0.217692	S0
20.7718	-0.218545	S0
20.7782	-0.219374	S0
20.784	-0.220179	S0
20.7896	-0.221026	S0
20.7961	-0.221867	S0
20.8023	-0.222683	S0
20.8079	-0.223493	S0
20.8145	-0.224285	S0
20.8212	-0.225106	S0
20.8269	-0.225878	S0
20.8338	-0.226666	S0
20.8398	-0.227435	S0
20.8467	-0.228231	S0
20.853	-0.229028	S0
20.8585	-0.229852	S0
20.8656	-0.230653	S0
20.8721	-0.231439	S0
20.8786	-0.232215	S0
20.8847	-0.232998	S0
20.8911	-0.233705	S0
20.8976	-0.234419	S0
20.9044	-0.23516	S0
20.9109	-0.235872	S0
20.917	-0.236628	S0
20.9238	-0.23742	S0
20.9298	-0.238188	S0
20.9364	-0.238886	S0
20.9429	-0.239679	S0
20.9496	-0.240511	S0
20.9556	-0.241243	S0
20.9626	-0.241956	S0
20.9692	-0.242628	S0
20.9765	-0.243306	S0
20.9828	-0.243995	S0
20.9892	-0.244656	S0
20.996	-0.245295	S0
21.0027	-0.245892	S0
21.0089	-0.246434	S0
21.0151	-0.247046	S0
21.0219	-0.24776	S0
21.0287	-0.248407	S0
21.0356	-0.249142	S0
21.0416	-0.249737	S0
21.0487	-0.250407	S0
21.056	-0.25118	S0
21.0627	-0.25181	S0
21.0692	-0.252416	S0
21.0755	-0.253059	S0
21.0823	-0.25374	S0
21.0884	-0.254286	S0
21.0958	-0.254893	S0
21.1029	-0.255484	S0
21.1096	-0.256118	S0
21.1159	-0.256683	S0
21.1228	-0.257332	S0
21.1296	-0.258012	S0
21.1362	-0.258622	S0
21.1436	-0.259178	S0
21.1506	-0.259741	S0
21.1571	-0.260429	S0
21.1635	-0.261023	S0
21.1707	-0.261577	S0
21.1779	-0.262127	S0
21.1848	-0.262689	S0
21.1912	-0.263211	S0
21.1982	-0.263796	S0
21.2052	-0.264306	S0
21.212	-0.264862	S0
21.2191	-0.265365	S0
21.2261	-0.26585	S0
21.2335	-0.266387	S0
21.2402	-0.266912	S0
21.2462	-0.267472	S0
21.2537	-0.268006	S0
21.2607	-0.268566	S0
21.2674	-0.269127	S0
21.2749	-0.269734	S0
21.2815	-0.270215	S0
21.2886	-0.270708	S0
21.2964	-0.271245	S0
21.3034	-0.271783	S0
21.3102	-0.272328	S0
21.3168	-0.272824	S0
21.3243	-0.273366	S0
21.3312	-0.273887	S0
21.338	-0.274313	S0
21.345	-0.274846	S0
21.3522	-0.275288	S0
21.359	-0.27572	S0
21.366	-0.276192	S0
21.3736	-0.276613	S0
21.3807	-0.277093	S0
21.3874	-0.277653	S0
21.3944	-0.278135	S0
21.4017	-0.27859	S0
21.4087	-0.279066	S0
21.416	-0.279522	S0
21.4238	-0.279945	S0
21.4303	-0.280259	S0
21.4377	-0.280701	S0
21.4447	-0.281144	S0
21.4526	-0.281644	S0
21.4595	-0.282127	S0
21.467	-0.282555	S0
21.4742	-0.283006	S0
21.481	-0.283478	S0
21.4882	-0.283901	S0
21.4959	-0.284319	S0
21.503	-0.284681	S0
21.5094	-0.285111	S0
21.5175	-0.285514	S0
21.5245	-0.285907	S0
21.5315	-0.286317	S0
21.5391	-0.28671	S0
21.5464	-0.287025	S0
21.5538	-0.287459	S0
21.5605	-0.287923	S0
21.5681	-0.288284	S0
21.5753	-0.288669	S0
21.5827	-0.289083	S0
21.5901	-0.289541	S0
21.597	-0.290048	S0
21.6044	-0.29036	S0
21.612	-0.290735	S0
21.6193	-0.291123	S0
21.6264	-0.291517	S0
21.6339	-0.291912	S0
21.6415	-0.292304	S0
21.6486	-0.292668	S0
21.6557	-0.293014	S0
21.6635	-0.293337	S0
21.6709	-0.293664	S0
21.6783	-0.294097	S0
21.6855	-0.294378	S0
21.6934	-0.294744	S0
21.7005	-0.295131	S0
21.7085	-0.295565	S0
21.7157	-0.295954	S0
21.7235	-0.296339	S0
21.7305	-0.296721	S0
21.7378	-0.297074	S0
21.7451	-0.297348	S0
21.7526	-0.297586	S0
21.7601	-0.297926	S0
21.7676	-0.298217	S0
21.7756	-0.298553	S0
21.7829	-0.298923	S0
21.7899	-0.299288	S0
21.7972	-0.299638	S0
21.8044	-0.30001	S0
21.8124	-0.300394	S0
21.8198	-0.300743	S0
21.8272	-0.301021	S0
21.8351	-0.301305	S0
21.8427	-0.301567	S0
21.8494	-0.301851	S0
21.8573	-0.302186	S0
21.8647	-0.302503	S0
21.8729	-0.302793	S0
21.8801	-0.303015	S0
21.8874	-0.303288	S0
21.895	-0.303532	S0
21.9024	-0.303869	S0
21.9103	-0.304188	S0
21.9175	-0.304544	S0
21.925	-0.304804	S0
21.9327	-0.30511	S0
21.9407	-0.305413	S0
21.948	-0.30575	S0
21.955	-0.306095	S0
21.9633	-0.306334	S0
21.9705	-0.306585	S0
21.9777	-0.306891	S0
21.9855	-0.307204	S0
21.9935	-0.307498	S0
22.0011	-0.307737	S0
22.0084	-0.307974	S0
22.0158	-0.308162	S0
22.0237	-0.308427	S0
22.0317	-0.308692	S0
22.0395	-0.308942	S0
22.0468	-0.309148	S0
22.0541	-0.309373	S0
22.0619	-0.309777	S0
22.069	-0.31009	S0
22.0778	-0.310285	S0
22.0849	-0.310533	S0
22.0925	-0.310781	S0
22.1004	-0.310974	S0
22.1076	-0.31126	S0
22.1159	-0.311539	S0
22.1234	-0.311822	S0
22.1306	-0.312089	S0
22.1387	-0.312279	S0
22.1471	-0.312628	S0
22.1546	-0.312919	S0
22.1617	-0.312998	S0
22.1698	-0.313208	S0
22.1768	-0.313451	S0
22.1842	-0.313729	S0
22.1921	-0.314033	S0
22.1994	-0.314228	S0
22.2076	-0.314471	S0
22.2152	-0.314678	S0
22.2234	-0.314857	S0
22.2312	-0.315098	S0
22.2388	-0.315236	S0
22.2462	-0.315285	S0
22.2536	-0.315445	S0
22.2622	-0.31569	S0
22.2702	-0.316041	S0
22.2776	-0.316334	S0
22.2851	-0.316564	S0
22.2929	-0.316832	S0
22.3005	-0.317037	S0
22.3081	-0.317236	S0
22.3162	-0.317457	S0
22.3239	-0.317639	S0
22.3318	-0.317758	S0
22.3388	-0.317936	S0
22.3474	-0.318141	S0
22.3549	-0.318342	S0
22.3628	-0.31858	S0
22.3705	-0.318782	S0
22.3784	-0.319041	S0
22.386	-0.319243	S0
22.3936	-0.319448	S0
22.4018	-0.319689	S0
22.4089	-0.319776	S0
22.4172	-0.319958	S0
22.4244	-0.320108	S0
22.4326	-0.320315	S0
22.4408	-0.320511	S0
22.4484	-0.32067	S0
22.4559	-0.320885	S0
22.464	-0.321113	S0
22.4719	-0.321318	S0
22.4798	-0.321563	S0
22.4869	-0.321798	S0
22.4951	-0.321911	S0
22.5029	-0.322088	S0
22.511	-0.322232	S0
22.5192	-0.322462	S0
22.5269	-0.32268	S0
22.5349	-0.322868	S0
22.5426	-0.323035	S0
22.5507	-0.32318	S0
22.5591	-0.32335	S0
22.5659	-0.323548	S0
22.5738	-0.323738	S0
22.5821	-0.323891	S0
22.5899	-0.324058	S0
22.5977	-0.324105	S0
22.6053	-0.324257	S0
22.6135	-0.324338	S0
22.6207	-0.324448	S0
22.6291	-0.324562	S0
22.637	-0.324732	S0
22.6451	-0.324873	S0
22.6523	-0.325044	S0
22.6599	-0.325132	S0
22.6682	-0.325282	S0
22.6762	-0.325522	S0
22.6842	-0.325733	S0
22.6923	-0.325911	S0
22.7005	-0.3261	S0
22.7078	-0.326237	S0
22.7154	-0.326392	S0
22.7237	-0.326557	S0
22.7318	-0.326747	S0
22.7393	-0.326917	S0
22.7478	-0.327061	S0
22.7557	-0.327178	S0
22.7637	-0.32729	S0
22.7712	-0.327417	S0
22.7795	-0.327571	S0
22.7875	-0.327767	S0
22.7951	-0.327893	S0
22.8025	-0.328003	S0
22.8116	-0.328121	S0
22.8191	-0.328225	S0
22.8272	-0.328341	S0
22.8353	-0.328423	S0
22.8428	-0.328565	S0
22.8509	-0.328644	S0
22.8582	-0.328785	S0
22.8661	-0.328949	S0
22.8747	-0.329126	S0
22.8825	-0.329319	S0
22.89	-0.329503	S0
22.8981	-0.329612	S0
22.9062	-0.329673	S0
22.9139	-0.329769	S0
22.9224	-0.329856	S0
22.9302	-0.329911	S0
22.9381	-0.330003	S0
22.9462	-0.330131	S0
22.9541	-0.330264	S0
22.9623	-0.330445	S0
22.9699	-0.330702	S0
22.9784	-0.330905	S0
22.986	-0.331024	S0
22.9943	-0.331101	S0
23.002	-0.331218	S0
23.0098	-0.331318	S0
23.0177	-0.331392	S0
23.0256	-0.331479	S0
23.0335	-0.331559	S0
23.0414	-0.331632	S0
23.0495	-0.331711	S0
23.058	-0.331852	S0
23.066	-0.332015	S0
23.0735	-0.332163	S0
23.0817	-0.332289	S0
23.0902	-0.332398	S0
23.098	-0.332557	S0
23.1056	-0.332684	S0
23.1136	-0.332822	S0
23.1216	-0.332919	S0
23.1296	-0.333031	S0
23.1371	-0.333128	S0
23.146	-0.333203	S0
23.154	-0.33325	S0
23.1621	-0.333309	S0
23.1699	-0.333393	S0
23.1778	-0.333454	S0
23.1862	-0.333586	S0
23.1946	-0.333695	S0
23.2021	-0.333808	S0
23.2096	-0.333921	S0
23.2173	-0.334053	S0
23.2259	-0.334161	S0
23.2342	-0.334245	S0
23.2424	-0.334303	S0
23.2501	-0.334392	S0
23.2581	-0.33451	S0
23.2661	-0.33461	S0
23.2745	-0.334741	S0
23.2821	-0.334861	S0
23.2912	-0.334972	S0
23.2992	-0.335124	S0
23.3066	-0.335266	S0
23.3143	-0.33538	S0
23.3228	-0.335472	S0
23.3309	-0.335571	S0
23.3383	-0.335643	S0
23.3465	-0.335695	S0
23.355	-0.335768	S0
23.3628	-0.335851	S0
23.371	-0.335945	S0
23.3788	-0.336045	S0
23.3866	-0.336169	S0
23.3954	-0.336267	S0
23.4031	-0.336352	S0
23.4116	-0.33645	S0
23.4192	-0.336549	S0
23.4276	-0.336638	S0
23.4357	-0.33669	S0
23.4442	-0.336757	S0
23.4522	-0.336845	S0
23.46	-0.336929	S0
23.4682	-0.337049	S0
23.4761	-0.337147	S0
23.4845	-0.337228	S0
23.4924	-0.337296	S0
23.5004	-0.337374	S0
23.5077	-0.337456	S0
23.5159	-0.33752	S0
23.5248	-0.337581	S0
23.5329	-0.337675	S0
23.5408	-0.337798	S0
23.5487	-0.337895	S0
23.5569	-0.337996	S0
23.5646	-0.338102	S0
23.5731	-0.338218	S0
23.5817	-0.338313	S0
23.5891	-0.338385	S0
23.5969	-0.338448	S0
23.6058	-0.338496	S0
23.6139	-0.338539	S0
23.6221	-0.338617	S0
23.63	-0.338686	S0
23.6378	-0.33875	S0
23.646	-0.338819	S0
23.6539	-0.338907	S0
23.6625	-0.33899	S0
23.6708	-0.339077	S0
23.6783	-0.339151	S0
23.6865	-0.339216	S0
23.6953	-0.339281	S0
23.7031	-0.339336	S0
23.7112	-0.339386	S0
23.7188	-0.339445	S0
23.7267	-0.339496	S0
23.7353	-0.339539	S0
23.7436	-0.339592	S0
23.7519	-0.339659	S0
23.7603	-0.339731	S0
23.7682	-0.339813	S0
23.7764	-0.339912	S0
23.7843	-0.340021	S0
23.7923	-0.340115	S0
23.8004	-0.340226	S0
23.8086	-0.340321	S0
23.8164	-0.3404	S0
23.8247	-0.340449	S0
23.8328	-0.340499	S0
23.8414	-0.340561	S0
23.8498	-0.340613	S0
23.8576	-0.340664	S0
23.866	-0.34071	S0
23.8743	-0.340768	S0
23.8827	-0.340823	S0
23.8906	-0.340888	S0
23.8987	-0.34095	S0
23.9071	-0.341014	S0
23.9146	-0.341094	S0
23.9231	-0.341178	S0
23.931	-0.341264	S0
23.9393	-0.341337	S0
23.9473	-0.341403	S0
23.9555	-0.341451	S0
23.9633	-0.341496	S0
23.9724	-0.341534	S0
23.9802	-0.341572	S0
23.9883	-0.3416	S0
23.9964	-0.341637	S0
24.0046	-0.341679	S0
24.0134	-0.341729	S0
24.0211	-0.341785	S0
24.0285	-0.341835	S0
24.0374	-0.341876	S0
24.0458	-0.341918	S0
24.0536	-0.341961	S0
24.0614	-0.342022	S0
24.07	-0.342087	S0
24.0781	-0.34215	S0
24.0858	-0.342209	S0
24.0941	-0.34227	S0
24.1029	-0.342337	S0
24.1108	-0.342408	S0
24.1189	-0.342477	S0
24.1274	-0.34255	S0
24.135	-0.342618	S0
24.1427	-0.34268	S0
24.1515	-0.342741	S0
24.1599	-0.342793	S0
24.168	-0.342832	S0
24.176	-0.342857	S0
24.1842	-0.342873	S0
24.192	-0.342886	S0
24.2005	-0.342907	S0
24.209	-0.342928	S0
24.2176	-0.342962	S0
24.2259	-0.343009	S0
24.2337	-0.343064	S0
24.2418	-0.343109	S0
24.2495	-0.343165	S0
24.2577	-0.343226	S0
24.266	-0.343292	S0
24.2745	-0.343351	S0
24.2822	-0.343406	S0
24.291	-0.343459	S0
24.2988	-0.343517	S0
24.3072	-0.343581	S0
24.3152	-0.34363	S0
24.3238	-0.343685	S0
24.3316	-0.34372	S0
24.3403	-0.343751	S0
24.3485	-0.343785	S0
24.3568	-0.34382	S0
24.3648	-0.343854	S0
24.3725	-0.343887	S0
24.3811	-0.34392	S0
24.3893	-0.343963	S0
24.3968	-0.344	S0
24.4054	-0.344027	S0
24.4136	-0.344048	S0
24.4223	-0.344066	S0
24.4303	-0.344084	S0
24.4383	-0.344107	S0
24.4464	-0.344137	S0
24.4548	-0.344186	S0
24.4636	-0.344228	S0
24.4711	-0.344279	S0
24.4796	-0.344332	S0
24.4879	-0.344387	S0
24.496	-0.344444	S0
24.5045	-0.344498	S0
24.513	-0.344545	S0
24.5206	-0.344581	S0
24.5291	-0.344617	S0
24.5374	-0.344642	S0
24.5457	-0.344665	S0
24.5538	-0.344686	S0
24.5614	-0.344705	S0
24.5699	-0.344722	S0
24.5775	-0.34474	S0
24.586	-0.344758	S0
24.5945	-0.344785	S0
24.6024	-0.344816	S0
24.6103	-0.344852	S0
24.6193	-0.344891	S0
24.6276	-0.344926	S0
24.6358	-0.344963	S0
24.6434	-0.345006	S0
24.6522	-0.345043	S0
24.6605	-0.345072	S0
24.6685	-0.345095	S0
24.6766	-0.345111	S0
24.6851	-0.345119	S0
24.6926	-0.345129	S0
24.7009	-0.345139	S0
24.7096	-0.345149	S0
24.7174	-0.345169	S0
24.7258	-0.345203	S0
24.7343	-0.345248	S0
24.7421	-0.345308	S0
24.7506	-0.345376	S0
24.7585	-0.345454	S0
24.7668	-0.345526	S0
24.7754	-0.345575	S0
24.7831	-0.345611	S0
24.7921	-0.345631	S0
24.7996	-0.345646	S0
24.8082	-0.345663	S0
24.8163	-0.345682	S0
24.8239	-0.3457	S0
24.8334	-0.34572	S0
24.8412	-0.34574	S0
24.8496	-0.345767	S0
24.8574	-0.345803	S0
24.8656	-0.345839	S0
24.8744	-0.345869	S0
24.8824	-0.345902	S0
24.8906	-0.345938	S0
24.8988	-0.345976	S0
24.9065	-0.346012	S0
24.9149	-0.346041	S0
24.9236	-0.346077	S0
24.9319	-0.346106	S0
24.9399	-0.346125	S0
24.9481	-0.346141	S0
24.9558	-0.346159	S0
24.9652	-0.346176	S0
24.9726	-0.346192	S0
24.9812	-0.346211	S0
24.9887	-0.346239	S0
24.9977	-0.346268	S0
25.0063	-0.346291	S0
25.0141	-0.34631	S0
25.0227	-0.346338	S0
25.0306	-0.346371	S0
25.0396	-0.346401	S0
25.0472	-0.346433	S0
25.0557	-0.346476	S0
25.0641	-0.346526	S0
25.0726	-0.346576	S0
25.0801	-0.346623	S0
25.0882	-0.346667	S0
25.0964	-0.346699	S0
25.1052	-0.346723	S0
25.1136	-0.346737	S0
25.1218	-0.346751	S0
25.1298	-0.346771	S0
25.1381	-0.346792	S0
25.1466	-0.346814	S0
25.1543	-0.346825	S0
25.1628	-0.346839	S0
25.1702	-0.346859	S0
25.1792	-0.346878	S0
25.1876	-0.3469	S0
25.1952	-0.346925	S0
25.2039	-0.346953	S0
25.212	-0.346974	S0
25.2206	-0.346991	S0
25.2284	-0.34701	S0
25.2372	-0.347025	S0
25.2453	-0.34704	S0
25.2537	-0.347049	S0
25.2617	-0.347068	S0
25.27	-0.347085	S0
25.2782	-0.347104	S0
25.2864	-0.347123	S0
25.2952	-0.347149	S0
25.3035	-0.347179	S0
25.3112	-0.34721	S0
25.3196	-0.347242	S0
25.328	-0.347268	S0
25.3367	-0.34729	S0
25.3445	-0.347306	S0
25.3533	-0.347336	S0
25.3614	-0.347353	S0
25.3692	-0.347374	S0
25.3775	-0.347391	S0
25.3858	-0.347409	S0
25.3936	-0.347429	S0
25.402	-0.347445	S0
25.41	-0.347462	S0
25.4188	-0.347482	S0
25.4275	-0.347498	S0
25.4351	-0.347511	S0
25.4442	-0.347527	S0
25.4522	-0.34754	S0
25.4606	-0.347552	S0
25.4684	-0.347562	S0
25.4769	-0.34757	S0
25.4856	-0.347586	S0
25.4933	-0.347611	S0
25.5017	-0.347636	S0
25.5098	-0.347666	S0
25.5183	-0.347702	S0
25.5267	-0.347733	S0
25.5346	-0.347762	S0
25.5428	-0.347793	S0
25.5517	-0.347823	S0
25.5596	-0.347849	S0
25.5677	-0.347868	S0
25.5765	-0.347882	S0
25.5839	-0.347902	S0
25.5925	-0.347915	S0
25.601	-0.347927	S0
25.6095	-0.347937	S0
25.6175	-0.347943	S0
25.6259	-0.347949	S0
25.6342	-0.347956	S0
25.6429	-0.347969	S0
25.651	-0.34798	S0
25.6592	-0.347992	S0
25.667	-0.348004	S0
25.6754	-0.348015	S0
25.6837	-0.348028	S0
25.6919	-0.348041	S0
25.7004	-0.348054	S0
25.7085	-0.348067	S0
25.7169	-0.348079	S0
25.7256	-0.348086	S0
25.7337	-0.348096	S0
25.7421	-0.348109	S0
25.7502	-0.348122	S0
25.7583	-0.348139	S0
25.7667	-0.348153	S0
25.775	-0.348173	S0
25.7834	-0.348197	S0
25.7917	-0.348227	S0
25.8001	-0.348271	S0
25.8088	-0.348313	S0
25.8162	-0.34834	S0
25.8248	-0.348357	S0
25.8329	-0.348369	S0
25.8419	-0.348386	S0
25.85	-0.3484	S0
25.858	-0.348413	S0
25.8663	-0.34843	S0
25.875	-0.348448	S0
25.8829	-0.34847	S0
25.8912	-0.34849	S0
25.899	-0.348508	S0
25.9073	-0.348523	S0
25.9161	-0.348536	S0
25.9239	-0.348545	S0
25.9325	-0.348559	S0
25.9403	-0.348578	S0
25.9492	-0.34859	S0
25.9575	-0.348605	S0
25.9653	-0.348613	S0
25.974	-0.348624	S0
25.982	-0.348631	S0
25.9904	-0.348644	S0
25.9986	-0.348653	S0
26.007	-0.34866	S0
26.0155	-0.348668	S0
26.0242	-0.348679	S0
26.0327	-0.348691	S0
26.0408	-0.348708	S0
26.049	-0.348721	S0
26.0569	-0.348731	S0
26.065	-0.348742	S0
26.0736	-0.348756	S0
26.0819	-0.348772	S0
26.0895	-0.348783	S0
26.098	-0.348794	S0
26.1068	-0.3488	S0
26.115	-0.34881	S0
26.1239	-0.348817	S0
26.1311	-0.348827	S0
26.1398	-0.348837	S0
26.1478	-0.348848	S0
26.1561	-0.348861	S0
26.1647	-0.348877	S0
26.1735	-0.348896	S0
26.1818	-0.34891	S0
26.1896	-0.348923	S0
26.1981	-0.348934	S0
26.2064	-0.348948	S0
26.2152	-0.348959	S0
26.223	-0.348968	S0
26.2319	-0.348978	S0
26.2396	-0.348985	S0
26.2484	-0.348993	S0
26.2562	-0.349002	S0
26.2646	-0.349014	S0
26.2728	-0.349027	S0
26.2812	-0.349039	S0
26.29	-0.349054	S0
26.2977	-0.349066	S0
26.3057	-0.349073	S0
26.3143	-0.349083	S0
26.322	-0.349103	S0
26.3305	-0.349127	S0
26.3391	-0.349156	S0
26.3475	-0.349183	S0
26.3555	-0.349203	S0
26.3643	-0.349218	S0
26.3719	-0.349231	S0
26.3804	-0.349243	S0
26.3891	-0.349254	S0
26.3969	-0.349263	S0
26.4049	-0.349272	S0
26.4143	-0.34928	S0
26.4224	-0.349287	S0
26.4305	-0.349294	S0
26.4392	-0.349302	S0
26.447	-0.349309	S0
26.4559	-0.349317	S0
26.4643	-0.349324	S0
26.4723	-0.349332	S0
26.4807	-0.349339	S0
26.4891	-0.349346	S0
26.4969	-0.349354	S0
26.505	-0.349363	S0
26.5137	-0.349372	S0
26.5219	-0.349381	S0
26.5304	-0.349391	S0
26.5382	-0.349399	S0
26.5467	-0.349406	S0
26.5549	-0.349414	S0
26.5639	-0.349421	S0
26.5717	-0.349428	S0
26.5804	-0.349436	S0
26.5889	-0.349449	S0
26.5969	-0.349464	S0
26.6053	-0.349481	S0
26.6132	-0.3495	S0
26.622	-0.349517	S0
26.63	-0.349531	S0
26.6381	-0.349548	S0
26.6467	-0.349562	S0
26.655	-0.349571	S0
26.6629	-0.349578	S0
26.6714	-0.349585	S0
26.6793	-0.349593	S0
26.6882	-0.349599	S0
26.6964	-0.349605	S0
26.7047	-0.349611	S0
26.7131	-0.34962	S0
26.7217	-0.349634	S0
26.7293	-0.34965	S0
26.7378	-0.349669	S0
26.7468	-0.349685	S0
26.7546	-0.3497	S0
26.7625	-0.349717	S0
26.7711	-0.349737	S0
26.7791	-0.349753	S0
26.7876	-0.349764	S0
26.7961	-0.349776	S0
26.8041	-0.349782	S0
26.8127	-0.349789	S0
26.8212	-0.349797	S0
26.8295	-0.349804	S0
26.8372	-0.349813	S0
26.8455	-0.34982	S0
26.8541	-0.349827	S0
26.8621	-0.349836	S0
26.8711	-0.349849	S0
26.8786	-0.34986	S0
26.8872	-0.34987	S0
26.8958	-0.349878	S0
26.9037	-0.349884	S0
26.9122	-0.349891	S0
26.9205	-0.349897	S0
26.9289	-0.349904	S0
26.9368	-0.349913	S0
26.9459	-0.349926	S0
26.9543	-0.349942	S0
26.9627	-0.349955	S0
26.9712	-0.349964	S0
26.9787	-0.349972	S0
26.9871	-0.349978	S0
26.9958	-0.349985	S0
27.0044	-0.349993	S0
27.0126	-0.350006	S0
27.021	-0.350023	S0
27.0292	-0.350035	S0
27.0375	-0.350045	S0
27.0452	-0.350054	S0
27.0538	-0.350061	S0
27.0618	-0.350068	S0
27.0698	-0.350076	S0
27.0785	-0.350082	S0
27.0871	-0.350088	S0
27.0955	-0.350095	S0
27.1039	-0.350102	S0
27.1122	-0.350108	S0
27.1205	-0.350115	S0
27.1286	-0.350121	S0
27.1372	-0.350128	S0
27.1452	-0.350134	S0
27.1534	-0.35014	S0
27.1614	-0.350146	S0
27.17	-0.350154	S0
27.1786	-0.350163	S0
27.1871	-0.350171	S0
27.1948	-0.350178	S0
27.2036	-0.350185	S0
27.212	-0.350191	S0
27.2198	-0.350197	S0
27.2281	-0.350202	S0
27.2368	-0.350208	S0
27.2454	-0.350212	S0
27.2533	-0.350218	S0
27.2623	-0.350226	S0
27.2705	-0.350241	S0
27.2787	-0.350264	S0
27.2862	-0.350292	S0
27.2947	-0.350318	S0
27.3029	-0.350337	S0
27.3112	-0.350353	S0
27.3202	-0.350368	S0
27.3285	-0.350376	S0
27.3366	-0.350382	S0
27.345	-0.350388	S0
27.3529	-0.350394	S0
27.3615	-0.350399	S0
27.3702	-0.350405	S0
27.3784	-0.350411	S0
27.3857	-0.350416	S0
27.3942	-0.350422	S0
27.4031	-0.350428	S0
27.4116	-0.350435	S0
27.4197	-0.350441	S0
27.4281	-0.350449	S0
27.4359	-0.350456	S0
27.4453	-0.350462	S0
27.4529	-0.350469	S0
27.4618	-0.350474	S0
27.4699	-0.35048	S0
27.478	-0.350486	S0
27.487	-0.350491	S0
27.4957	-0.350497	S0
27.5035	-0.350503	S0
27.5118	-0.350509	S0
27.5198	-0.350517	S0
27.5281	-0.350525	S0
27.5364	-0.350535	S0
27.5446	-0.350544	S0
27.5528	-0.350551	S0
27.5614	-0.350556	S0
27.5695	-0.350561	S0
27.5776	-0.350566	S0
27.5865	-0.350572	S0
27.595	-0.350582	S0
27.6032	-0.350594	S0
27.6111	-0.350603	S0
27.6197	-0.350609	S0
27.6279	-0.350615	S0
27.6363	-0.350622	S0
27.6442	-0.350628	S0
27.6524	-0.350635	S0
27.6612	-0.35064	S0
27.6695	-0.350646	S0
27.6783	-0.350651	S0
27.6865	-0.350657	S0
27.6948	-0.350663	S0
27.7031	-0.350669	S0
27.7111	-0.350675	S0
27.7198	-0.350681	S0
27.7276	-0.350687	S0
27.7361	-0.350693	S0
27.744	-0.350699	S0
27.7523	-0.350706	S0
27.7606	-0.350712	S0
27.769	-0.350718	S0
27.7778	-0.350724	S0
27.7863	-0.35073	S0
27.7944	-0.350735	S0
27.8029	-0.35074	S0
27.8109	-0.350745	S0
27.8197	-0.35075	S0
27.8276	-0.350755	S0
27.8363	-0.35076	S0
27.8443	-0.350766	S0
27.8528	-0.350773	S0
27.861	-0.350779	S0
27.8693	-0.350788	S0
27.8774	-0.350797	S0
27.8861	-0.350803	S0
27.8942	-0.350809	S0
27.9026	-0.350815	S0
27.9113	-0.35082	S0
27.9193	-0.350826	S0
27.9274	-0.350831	S0
27.9354	-0.350838	S0
27.9437	-0.350843	S0
27.9522	-0.350848	S0
27.9606	-0.350854	S0
27.969	-0.35086	S0
27.9774	-0.350865	S0
27.986	-0.350871	S0
27.9939	-0.350876	S0
28.0027	-0.350881	S0
28.0119	-0.350886	S0
28.0194	-0.350891	S0
28.0276	-0.350896	S0
28.0357	-0.350901	S0
28.0441	-0.350906	S0
28.0525	-0.35091	S0
28.0608	-0.350915	S0
28.0685	-0.35092	S0
28.0776	-0.350926	S0
28.0861	-0.350931	S0
28.094	-0.350937	S0
28.1023	-0.350942	S0
28.1109	-0.350948	S0
28.1192	-0.350953	S0
28.128	-0.350958	S0
28.1356	-0.350963	S0
28.1441	-0.350968	S0
28.1532	-0.350972	S0
28.1611	-0.350977	S0
28.1693	-0.350982	S0
28.1782	-0.350988	S0
28.1861	-0.350993	S0
28.1945	-0.350997	S0
28.2027	-0.351001	S0
28.2101	-0.351005	S0
28.2193	-0.351008	S0
28.2273	-0.351013	S0
28.2355	-0.351017	S0
28.2442	-0.351022	S0
28.252	-0.351027	S0
28.2603	-0.351031	S0
28.2686	-0.351037	S0
28.2772	-0.351043	S0
28.286	-0.351048	S0
28.2939	-0.351052	S0
28.3027	-0.351057	S0
28.3102	-0.351062	S0
28.3189	-0.351066	S0
28.3275	-0.351071	S0
28.3359	-0.351076	S0
28.3444	-0.351081	S0
28.3524	-0.351086	S0
28.3608	-0.351091	S0
28.3692	-0.351097	S0
28.3773	-0.351103	S0
28.3861	-0.351108	S0
28.3935	-0.351113	S0
28.4024	-0.351118	S0
28.4103	-0.351122	S0
28.4189	-0.351125	S0
28.4277	-0.351129	S0
28.4353	-0.351133	S0
28.4437	-0.351137	S0
28.4522	-0.351141	S0
28.4607	-0.351145	S0
28.4696	-0.35115	S0
28.478	-0.351155	S0
28.4861	-0.35116	S0
28.4942	-0.351164	S0
28.5024	-0.351169	S0
28.5105	-0.351173	S0
28.5188	-0.351178	S0
28.5266	-0.351185	S0
28.5354	-0.351193	S0
28.5443	-0.3512	S0
28.5522	-0.351205	S0
28.5605	-0.351209	S0
28.569	-0.351214	S0
28.5773	-0.351218	S0
28.5858	-0.351222	S0
28.5938	-0.351227	S0
28.6022	-0.351231	S0
28.6109	-0.351236	S0
28.6191	-0.351241	S0
28.6268	-0.351247	S0
28.6361	-0.351255	S0
28.6438	-0.351264	S0
28.6528	-0.35127	S0
28.6613	-0.351275	S0
28.669	-0.35128	S0
28.6778	-0.351286	S0
28.6858	-0.351294	S0
28.6944	-0.351304	S0
28.7028	-0.351312	S0
28.7107	-0.35132	S0
28.7197	-0.351326	S0
28.7276	-0.35133	S0
28.7358	-0.351334	S0
28.7443	-0.351338	S0
28.7523	-0.351341	S0
28.7604	-0.351345	S0
28.7686	-0.351348	S0
28.777	-0.351352	S0
28.7856	-0.351355	S0
28.7943	-0.351359	S0
28.8025	-0.351363	S0
28.8112	-0.351367	S0
28.8193	-0.351372	S0
28.8278	-0.351376	S0
28.8365	-0.35138	S0
28.8437	-0.351386	S0
28.8532	-0.351391	S0
28.861	-0.351396	S0
28.869	-0.351402	S0
28.8776	-0.351407	S0
28.8861	-0.351412	S0
28.8945	-0.351417	S0
28.9026	-0.351421	S0
28.9106	-0.351426	S0
28.9193	-0.35143	S0
28.9281	-0.351434	S0
28.9366	-0.351438	S0
28.9446	-0.351441	S0
28.9531	-0.351445	S0
28.9613	-0.351449	S0
28.9694	-0.351453	S0
28.9772	-0.351457	S0
28.9861	-0.351462	S0
28.9941	-0.351465	S0
29.0025	-0.351469	S0
29.0107	-0.351473	S0
29.0193	-0.351478	S0
29.027	-0.351483	S0
29.0356	-0.351487	S0
29.044	-0.351492	S0
29.0524	-0.351498	S0
29.0606	-0.351503	S0
29.0691	-0.351508	S0
29.078	-0.351512	S0
29.0856	-0.351516	S0
29.0945	-0.35152	S0
29.1025	-0.351524	S0
29.1109	-0.351528	S0
29.1196	-0.351531	S0
29.128	-0.351535	S0
29.1363	-0.351538	S0
29.1438	-0.351541	S0
29.1525	-0.351546	S0
29.1608	-0.35155	S0
29.1696	-0.351553	S0
29.1779	-0.351557	S0
29.1862	-0.35156	S0
29.1947	-0.351564	S0
29.203	-0.351568	S0
29.2112	-0.351572	S0
29.2191	-0.351575	S0
29.2276	-0.351579	S0
29.2361	-0.351582	S0
29.2448	-0.351585	S0
29.2523	-0.351588	S0
29.2605	-0.351592	S0
29.2696	-0.351596	S0
29.2776	-0.3516	S0
29.2856	-0.351604	S0
29.2941	-0.351608	S0
29.3021	-0.351611	S0
29.3104	-0.351615	S0
29.319	-0.351618	S0
29.3269	-0.351622	S0
29.3356	-0.351625	S0
29.3435	-0.35163	S0
29.3521	-0.351633	S0
29.3603	-0.351636	S0
29.3694	-0.35164	S0
29.3772	-0.351643	S0
29.386	-0.351646	S0
29.3942	-0.351648	S0
29.403	-0.351651	S0
29.4107	-0.351654	S0
29.4199	-0.351657	S0
29.4275	-0.35166	S0
29.4357	-0.351664	S0
29.4438	-0.351668	S0
29.4523	-0.351672	S0
29.4606	-0.351675	S0
29.469	-0.351679	S0
29.4772	-0.351683	S0
29.4859	-0.351686	S0
29.4936	-0.35169	S0
29.5029	-0.351692	S0
29.5107	-0.351696	S0
29.5193	-0.351699	S0
29.5273	-0.351701	S0
29.5362	-0.351705	S0
29.5439	-0.351708	S0
29.5529	-0.351712	S0
29.5607	-0.351714	S0
29.5689	-0.351718	S0
29.5776	-0.351721	S0
29.5861	-0.351725	S0
29.5949	-0.351727	S0
29.6029	-0.351729	S0
29.6111	-0.351732	S0
29.6193	-0.351734	S0
29.6272	-0.351736	S0
29.636	-0.351737	S0
29.6438	-0.351739	S0
29.6528	-0.351741	S0
29.6607	-0.351744	S0
29.669	-0.351747	S0
29.678	-0.35175	S0
29.6858	-0.351754	S0
29.6944	-0.351758	S0
29.7027	-0.351762	S0
29.7114	-0.351767	S0
29.7196	-0.351771	S0
29.728	-0.351775	S0
29.736	-0.351777	S0
29.744	-0.35178	S0
29.7529	-0.351783	S0
29.761	-0.351786	S0
29.7691	-0.351789	S0
29.7774	-0.351791	S0
29.7858	-0.351794	S0
29.794	-0.351796	S0
29.8026	-0.351798	S0
29.8106	-0.3518	S0
29.819	-0.351801	S0
29.8275	-0.351802	S0
29.8359	-0.351804	S0
29.8442	-0.351806	S0
29.8526	-0.351809	S0
29.8615	-0.351811	S0
29.8694	-0.351814	S0
29.8781	-0.351817	S0
29.886	-0.35182	S0
29.8943	-0.351822	S0
29.9027	-0.351824	S0
29.9118	-0.351827	S0
29.92	-0.351829	S0
29.9279	-0.351831	S0
29.9366	-0.351833	S0
29.9446	-0.351836	S0
29.9531	-0.351839	S0
29.9608	-0.351842	S0
29.9697	-0.351845	S0
29.9784	-0.351849	S0
29.9861	-0.351851	S0
29.9949	-0.351854	S0
30.0033	-0.351857	S0
30.0114	-0.35186	S0
30.0195	-0.351863	S0
30.0279	-0.351866	S0
30.0361	-0.351869	S0
30.0447	-0.351871	S0
30.0527	-0.351874	S0
30.0614	-0.351877	S0
30.0696	-0.351879	S0
30.0773	-0.351881	S0
30.0861	-0.351883	S0
30.0948	-0.351885	S0
30.1034	-0.351887	S0
30.1115	-0.35189	S0
30.1197	-0.351892	S0
30.1284	-0.351894	S0
30.1363	-0.351895	S0
30.1446	-0.351897	S0
30.1531	-0.351899	S0
30.1608	-0.351901	S0
30.1689	-0.351903	S0
30.1777	-0.351903	S0
30.1863	-0.351905	S0
30.1947	-0.351907	S0
30.2035	-0.351909	S0
30.2118	-0.351911	S0
30.2202	-0.351913	S0
30.2285	-0.351915	S0
30.2365	-0.351917	S0
30.2448	-0.35192	S0
30.2535	-0.351922	S0
30.261	-0.351923	S0
30.2696	-0.351924	S0
30.2777	-0.351926	S0
30.2868	-0.351927	S0
30.2941	-0.351929	S0
30.303	-0.35193	S0
30.3115	-0.351931	S0
30.3197	-0.351933	S0
30.3286	-0.351935	S0
30.3369	-0.351937	S0
30.3447	-0.35194	S0
30.3533	-0.351942	S0
30.3618	-0.351944	S0
30.3696	-0.351946	S0
30.3777	-0.351949	S0
30.386	-0.351952	S0
30.3942	-0.351956	S0
30.4032	-0.351959	S0
30.4112	-0.351962	S0
30.4196	-0.351965	S0
30.4277	-0.351966	S0
30.4364	-0.351968	S0
30.4454	-0.351969	S0
30.4534	-0.35197	S0
30.4619	-0.351971	S0
30.4703	-0.351972	S0
30.4781	-0.351973	S0
30.4867	-0.351976	S0
30.4948	-0.351978	S0
30.5036	-0.35198	S0
30.5117	-0.351983	S0
30.52	-0.351985	S0
30.5288	-0.351988	S0
30.5367	-0.35199	S0
30.5449	-0.351993	S0
30.5531	-0.351994	S0
30.5614	-0.351996	S0
30.5706	-0.351997	S0
30.578	-0.351998	S0
30.5866	-0.351999	S0
30.5954	-0.352	S0
30.6034	-0.352002	S0
30.6112	-0.352003	S0
30.6198	-0.352005	S0
30.6282	-0.352007	S0
30.6369	-0.352009	S0
30.6452	-0.352011	S0
30.6534	-0.352013	S0
30.6617	-0.352014	S0
30.6694	-0.352016	S0
30.6781	-0.352016	S0
30.6864	-0.352017	S0
30.6947	-0.352018	S0
30.7036	-0.352019	S0
30.7117	-0.35202	S0
30.7197	-0.352021	S0
30.728	-0.352023	S0
30.7363	-0.352024	S0
30.745	-0.352027	S0
30.7535	-0.352028	S0
30.7614	-0.35203	S0
30.7701	-0.352031	S0
30.7785	-0.352033	S0
30.7865	-0.352034	S0
30.7945	-0.352036	S0
30.8033	-0.352038	S0
30.8116	-0.35204	S0
30.82	-0.352042	S0
30.8284	-0.352043	S0
30.8368	-0.352044	S0
30.8453	-0.352046	S0
30.8541	-0.352046	S0
30.8619	-0.352047	S0
30.8702	-0.352047	S0
30.8786	-0.352049	S0
30.8871	-0.35205	S0
30.8951	-0.352051	S0
30.9041	-0.352052	S0
30.9116	-0.352054	S0
30.9203	-0.352055	S0
30.9289	-0.352057	S0
30.9368	-0.352058	S0
30.945	-0.352059	S0
30.9532	-0.352059	S0
30.9621	-0.35206	S0
30.9703	-0.35206	S0
30.9784	-0.352061	S0
30.9868	-0.352062	S0
30.996	-0.352061	S0
31.0032	-0.352061	S0
31.0117	-0.352062	S0
31.0202	-0.352062	S0
31.0282	-0.352064	S0
31.0367	-0.352065	S0
31.0453	-0.352067	S0
31.0537	-0.352069	S0
31.0618	-0.352071	S0
31.0704	-0.352074	S0
31.0788	-0.352076	S0
31.0874	-0.352077	S0
31.0956	-0.352079	S0
31.1037	-0.35208	S0
31.1117	-0.352081	S0
31.1208	-0.352083	S0
31.129	-0.352084	S0
31.1375	-0.352086	S0
31.1457	-0.352089	S0
31.154	-0.352091	S0
31.1625	-0.352094	S0
31.17	-0.352096	S0
31.1785	-0.352098	S0
31.187	-0.352099	S0
31.1953	-0.352101	S0
31.2035	-0.352102	S0
31.2118	-0.352103	S0
31.2201	-0.352104	S0
31.2284	-0.352104	S0
31.2373	-0.352105	S0
31.2461	-0.352105	S0
31.2545	-0.352106	S0
31.2626	-0.352107	S0
31.2711	-0.352109	S0
31.2792	-0.352111	S0
31.2874	-0.352112	S0
31.296	-0.352114	S0
31.3043	-0.352116	S0
31.3123	-0.352117	S0
31.3207	-0.352118	S0
31.3294	-0.352119	S0
31.3371	-0.352119	S0
31.3458	-0.35212	S0
31.3544	-0.352119	S0
31.3626	-0.352119	S0
31.3704	-0.352118	S0
31.3792	-0.352118	S0
31.3877	-0.352117	S0
31.3958	-0.352118	S0
31.4041	-0.352118	S0
31.4127	-0.352119	S0
31.4211	-0.352121	S0
31.4291	-0.352122	S0
31.4378	-0.352125	S0
31.4462	-0.352127	S0
31.4544	-0.352129	S0
31.4625	-0.352131	S0
31.4708	-0.352132	S0
31.4792	-0.352133	S0
31.4874	-0.352134	S0
31.496	-0.352135	S0
31.5041	-0.352136	S0
31.5126	-0.352137	S0
31.5209	-0.352138	S0
31.5295	-0.352139	S0
31.5378	-0.352139	S0
31.5463	-0.352139	S0
31.5544	-0.35214	S0
31.5635	-0.352139	S0
31.571	-0.352139	S0
31.58	-0.35214	S0
31.5877	-0.352139	S0
31.5964	-0.352139	S0
31.6043	-0.35214	S0
31.6126	-0.35214	S0
31.621	-0.352142	S0
31.6294	-0.352143	S0
31.6376	-0.352145	S0
31.6463	-0.352146	S0
31.6549	-0.352147	S0
31.6622	-0.352149	S0
31.6712	-0.352151	S0
31.6788	-0.352151	S0
31.6878	-0.352152	S0
31.6963	-0.352152	S0
31.7037	-0.352151	S0
31.7127	-0.352151	S0
31.7218	-0.35215	S0
31.7294	-0.352149	S0
31.7377	-0.352149	S0
31.7462	-0.352149	S0
31.7544	-0.352149	S0
31.7625	-0.35215	S0
31.7713	-0.352152	S0
31.78	-0.352153	S0
31.788	-0.352154	S0
31.7966	-0.352156	S0
31.8045	-0.352156	S0
31.8126	-0.352157	S0
31.821	-0.352157	S0
31.8292	-0.352158	S0
31.8375	-0.352157	S0
31.8456	-0.352157	S0
31.8538	-0.352156	S0
31.8627	-0.352156	S0
31.8702	-0.352155	S0
31.8789	-0.352156	S0
31.8871	-0.352155	S0
31.8959	-0.352155	S0
31.9042	-0.352155	S0
31.9131	-0.352155	S0
31.9212	-0.352155	S0
31.9297	-0.352155	S0
31.9373	-0.352155	S0
31.9461	-0.352155	S0
31.9545	-0.352155	S0
31.9629	-0.352156	S0
31.9707	-0.352157	S0
31.9792	-0.352158	S0
31.9877	-0.352159	S0
31.9957	-0.352159	S0
32.0042	-0.35216	S0
32.0126	-0.352161	S0
32.0214	-0.352161	S0
32.0297	-0.352161	S0
32.0383	-0.352161	S0
32.0462	-0.352161	S0
32.0549	-0.352162	S0
32.0628	-0.352162	S0
32.0712	-0.352161	S0
32.0798	-0.352161	S0
32.0877	-0.352161	S0
32.0959	-0.352162	S0
32.1047	-0.352163	S0
32.1132	-0.352165	S0
32.1212	-0.352166	S0
32.1298	-0.352168	S0
32.1378	-0.352172	S0
32.1466	-0.352173	S0
32.155	-0.352174	S0
32.1637	-0.352175	S0
32.1721	-0.352176	S0
32.1802	-0.352178	S0
32.1886	-0.352179	S0
32.197	-0.35218	S0
32.205	-0.352182	S0
32.2131	-0.352183	S0
32.221	-0.352184	S0
32.2297	-0.352184	S0
32.2381	-0.352184	S0
32.2463	-0.352184	S0
32.2547	-0.352185	S0
32.2634	-0.352184	S0
32.2715	-0.352185	S0
32.28	-0.352186	S0
32.2882	-0.352187	S0
32.2967	-0.352189	S0
32.3046	-0.352192	S0
32.3134	-0.352194	S0
32.3218	-0.352196	S0
32.33	-0.352199	S0
32.3383	-0.352202	S0
32.347	-0.352204	S0
32.355	-0.352206	S0
32.3632	-0.352209	S0
32.3717	-0.352211	S0
32.3798	-0.352213	S0
32.3882	-0.352214	S0
32.3969	-0.352215	S0
32.4043	-0.352215	S0
32.4128	-0.352216	S0
32.4215	-0.352216	S0
32.4295	-0.352217	S0
32.438	-0.352218	S0
32.447	-0.352219	S0
32.4552	-0.35222	S0
32.4631	-0.352221	S0
32.471	-0.352223	S0
32.4798	-0.352224	S0
32.4883	-0.352225	S0
32.497	-0.352226	S0
32.5056	-0.352227	S0
32.5132	-0.352228	S0
32.5223	-0.352229	S0
32.5301	-0.35223	S0
32.5389	-0.352231	S0
32.5469	-0.352232	S0
32.5552	-0.352233	S0
32.5632	-0.352233	S0
32.5714	-0.352233	S0
32.5799	-0.352234	S0
32.5888	-0.352235	S0
32.5962	-0.352237	S0
32.6048	-0.352238	S0
32.613	-0.35224	S0
32.6221	-0.352242	S0
32.6304	-0.352244	S0
32.6388	-0.352246	S0
32.6471	-0.352248	S0
32.6553	-0.352249	S0
32.6642	-0.352251	S0
32.6718	-0.352252	S0
32.6798	-0.352253	S0
32.6885	-0.352255	S0
32.6966	-0.352255	S0
32.7052	-0.352256	S0
32.7134	-0.352256	S0
32.7219	-0.352257	S0
32.7303	-0.352257	S0
32.7392	-0.352258	S0
32.7472	-0.352258	S0
32.7553	-0.352259	S0
32.7641	-0.35226	S0
32.7722	-0.352262	S0
32.7805	-0.352264	S0
32.7888	-0.352265	S0
32.7971	-0.352267	S0
32.8052	-0.352268	S0
32.8138	-0.352269	S0
32.8227	-0.35227	S0
32.8309	-0.352271	S0
32.8386	-0.352272	S0
32.8474	-0.352273	S0
32.8554	-0.352274	S0
32.8637	-0.352276	S0
32.8726	-0.352277	S0
32.8802	-0.352278	S0
32.8888	-0.35228	S0
32.8971	-0.352282	S0
32.9052	-0.352284	S0
32.9141	-0.352286	S0
32.9228	-0.352288	S0
32.9309	-0.35229	S0
32.9387	-0.352291	S0
32.9473	-0.352292	S0
32.9558	-0.352292	S0
32.9641	-0.352293	S0
32.9726	-0.352293	S0
32.9808	-0.352293	S0
32.9892	-0.352293	S0
32.9967	-0.352292	S0
33.0058	-0.352292	S0
33.0138	-0.352293	S0
33.0218	-0.352293	S0
33.0301	-0.352293	S0
33.0385	-0.352293	S0
33.0473	-0.352293	S0
33.0553	-0.352293	S0
33.0639	-0.352293	S0
33.072	-0.352293	S0
33.0805	-0.352293	S0
33.089	-0.352293	S0
33.0972	-0.352294	S0
33.1058	-0.352296	S0
33.1146	-0.352297	S0
33.1219	-0.352299	S0
33.1307	-0.352301	S0
33.1397	-0.352302	S0
33.147	-0.352303	S0
33.1558	-0.352302	S0
33.1641	-0.352302	S0
33.1726	-0.352301	S0
33.1806	-0.3523	S0
33.189	-0.352299	S0
33.1974	-0.352298	S0
33.2055	-0.352297	S0
33.2143	-0.352296	S0
33.2229	-0.352296	S0
33.2308	-0.352296	S0
33.2398	-0.352296	S0
33.2472	-0.352296	S0
33.2557	-0.352296	S0
33.2643	-0.352296	S0
33.2724	-0.352297	S0
33.2804	-0.352298	S0
33.2888	-0.352299	S0
33.2975	-0.352299	S0
33.3061	-0.352299	S0
33.3142	-0.352299	S0
33.3224	-0.352298	S0
33.331	-0.352298	S0
33.3388	-0.352297	S0
33.3476	-0.352297	S0
33.3564	-0.352296	S0
33.3649	-0.352296	S0
33.3728	-0.352296	S0
33.3805	-0.352295	S0
33.389	-0.352296	S0
33.3971	-0.352297	S0
33.4052	-0.352297	S0
33.4142	-0.352299	S0
33.4222	-0.352299	S0
33.4308	-0.352301	S0
33.4392	-0.352301	S0
33.4475	-0.352301	S0
33.4556	-0.3523	S0
33.4641	-0.3523	S0
33.4725	-0.352299	S0
33.4808	-0.352298	S0
33.4895	-0.352298	S0
33.4976	-0.352299	S0
33.5061	-0.3523	S0
33.514	-0.352301	S0
33.5227	-0.352302	S0
33.5312	-0.352302	S0
33.5391	-0.352302	S0
33.5476	-0.352303	S0
33.556	-0.352303	S0
33.5638	-0.352303	S0
33.5727	-0.352303	S0
33.5811	-0.352303	S0
33.5896	-0.352303	S0
33.5978	-0.352303	S0
33.6062	-0.352303	S0
33.6143	-0.352303	S0
33.6228	-0.352303	S0
33.631	-0.352302	S0
33.6394	-0.352301	S0
33.6482	-0.352301	S0
33.6563	-0.352301	S0
33.6642	-0.352302	S0
33.6725	-0.352302	S0
33.6811	-0.352303	S0
33.6896	-0.352303	S0
33.6977	-0.352304	S0
33.7062	-0.352305	S0
33.7144	-0.352306	S0
33.723	-0.352306	S0
33.7318	-0.352306	S0
33.74	-0.352306	S0
33.7483	-0.352306	S0
33.7561	-0.352305	S0
33.7646	-0.352305	S0
33.7727	-0.352303	S0
33.7813	-0.352303	S0
33.7896	-0.352302	S0
33.7977	-0.352301	S0
33.8059	-0.352302	S0
33.8149	-0.352301	S0
33.8234	-0.352302	S0
33.8314	-0.352302	S0
33.8397	-0.352303	S0
33.8482	-0.352304	S0
33.8558	-0.352305	S0
33.8645	-0.352304	S0
33.8729	-0.352305	S0
33.8809	-0.352305	S0
33.8895	-0.352306	S0
33.8973	-0.352307	S0
33.9061	-0.352308	S0
33.9142	-0.352309	S0
33.9229	-0.35231	S0
33.931	-0.35231	S0
33.9398	-0.352311	S0
33.948	-0.352311	S0
33.9569	-0.352311	S0
33.9649	-0.35231	S0
33.9732	-0.352309	S0
33.9817	-0.352309	S0
33.9896	-0.352309	S0
33.9978	-0.352308	S0
34.0062	-0.352308	S0
34.0147	-0.352309	S0
34.023	-0.352309	S0
34.0315	-0.352309	S0
34.0402	-0.352309	S0
34.0482	-0.35231	S0
34.0565	-0.352309	S0
34.0646	-0.352309	S0
34.073	-0.352308	S0
34.0814	-0.352308	S0
34.0894	-0.352307	S0
34.0982	-0.352306	S0
34.1068	-0.352306	S0
34.115	-0.352306	S0
34.1239	-0.352305	S0
34.1314	-0.352305	S0
34.1403	-0.352306	S0
34.1481	-0.352308	S0
34.157	-0.35231	S0
34.1646	-0.352313	S0
34.1733	-0.352315	S0
34.1818	-0.352317	S0
34.1902	-0.352318	S0
34.1983	-0.352319	S0
34.2073	-0.35232	S0
34.215	-0.352322	S0
34.2237	-0.352322	S0
34.232	-0.352323	S0
34.2401	-0.352325	S0
34.2483	-0.352326	S0
34.2566	-0.352327	S0
34.2645	-0.352328	S0
34.2736	-0.352329	S0
34.2823	-0.35233	S0
34.2907	-0.352331	S0
34.2987	-0.352332	S0
34.3078	-0.352333	S0
34.3155	-0.352334	S0
34.3242	-0.352334	S0
34.3319	-0.352335	S0
34.3405	-0.352334	S0
34.3483	-0.352332	S0
34.3567	-0.35233	S0
34.3647	-0.352329	S0
34.3733	-0.352329	S0
34.3819	-0.35233	S0
34.3903	-0.35233	S0
34.3986	-0.352331	S0
34.4072	-0.352331	S0
34.4158	-0.352332	S0
34.424	-0.352333	S0
34.4328	-0.352335	S0
34.4407	-0.352336	S0
34.4493	-0.352337	S0
34.4568	-0.352337	S0
34.4652	-0.352339	S0
34.4741	-0.352339	S0
34.4828	-0.35234	S0
34.4907	-0.35234	S0
34.499	-0.352341	S0
34.5074	-0.352341	S0
34.5155	-0.352341	S0
34.5235	-0.352342	S0
34.5318	-0.352343	S0
34.5404	-0.352344	S0
34.5487	-0.352346	S0
34.5571	-0.352346	S0
34.5654	-0.352347	S0
34.574	-0.352347	S0
34.5822	-0.352347	S0
34.5903	-0.352348	S0
34.5992	-0.352349	S0
34.6074	-0.35235	S0
34.6153	-0.352351	S0
34.6242	-0.352352	S0
34.6323	-0.352354	S0
34.6405	-0.352355	S0
34.6489	-0.352355	S0
34.6572	-0.352356	S0
34.6653	-0.352356	S0
34.6739	-0.352356	S0
34.6824	-0.352357	S0
34.6907	-0.352357	S0
34.6993	-0.352358	S0
34.707	-0.352358	S0
34.7155	-0.352359	S0
34.7239	-0.35236	S0
34.7328	-0.35236	S0
34.7408	-0.352361	S0
34.7497	-0.352362	S0
34.7577	-0.352363	S0
34.7656	-0.352364	S0
34.7738	-0.352365	S0
34.7825	-0.352366	S0
34.7908	-0.352367	S0
34.7994	-0.352368	S0
34.8072	-0.35237	S0
34.8159	-0.352371	S0
34.8238	-0.352372	S0
34.8326	-0.352372	S0
34.8408	-0.352373	S0
34.8494	-0.352374	S0
34.8577	-0.352373	S0
34.8661	-0.352374	S0
34.8746	-0.352373	S0
34.8819	-0.352373	S0
34.8911	-0.352373	S0
34.8993	-0.352374	S0
34.9073	-0.352375	S0
34.916	-0.352376	S0
34.9239	-0.352376	S0
34.9328	-0.352377	S0
34.941	-0.352376	S0
34.9494	-0.352377	S0
34.9575	-0.352377	S0
34.9666	-0.352377	S0
34.9743	-0.352377	S0
34.983	-0.352378	S0
34.9911	-0.352379	S0
34.9991	-0.352381	S0
35.0076	-0.352383	S0
35.0162	-0.352384	S0
35.0242	-0.352384	S0
35.033	-0.352385	S0
35.0414	-0.352385	S0
35.0497	-0.352386	S0
35.0589	-0.352385	S0
35.0663	-0.352385	S0
35.0741	-0.352385	S0
35.0832	-0.352384	S0
35.0907	-0.352385	S0
35.0994	-0.352385	S0
35.1084	-0.352386	S0
35.1157	-0.352387	S0
35.1242	-0.352388	S0
35.1329	-0.352391	S0
35.1417	-0.352393	S0
35.1496	-0.352394	S0
35.1578	-0.352396	S0
35.1665	-0.352397	S0
35.1746	-0.352397	S0
35.1831	-0.352397	S0
35.1911	-0.352397	S0
35.2	-0.352396	S0
35.2084	-0.352395	S0
35.2168	-0.352395	S0
35.2245	-0.352394	S0
35.2337	-0.352394	S0
[truncated: 21,830 more rows]

## Sheet: AtLEA3-3_Trehalose
Temperature	Heat Flow (Normalized)	Sample
20.0195	-0.0151391	T0
20.0201	-0.0151395	T0
20.0194	-0.0151399	T0
20.0195	-0.0151406	T0
20.02	-0.0151412	T0
20.0198	-0.015142	T0
20.0199	-0.0151424	T0
20.0197	-0.0151429	T0
20.0198	-0.0151431	T0
20.0205	-0.0151433	T0
20.0199	-0.0151433	T0
20.02	-0.0151432	T0
20.0199	-0.0151433	T0
20.0202	-0.0151433	T0
20.02	-0.0151435	T0
20.0206	-0.0151437	T0
20.0207	-0.0151437	T0
20.0205	-0.0151438	T0
20.0208	-0.015144	T0
20.0212	-0.0151443	T0
20.021	-0.0151449	T0
20.0208	-0.0151456	T0
20.021	-0.0151466	T0
20.0218	-0.0151479	T0
20.0216	-0.0151492	T0
20.0216	-0.0151502	T0
20.0221	-0.0151514	T0
20.0228	-0.0151529	T0
20.023	-0.0151548	T0
20.0236	-0.0151586	T0
20.0242	-0.0151651	T0
20.0244	-0.0151742	T0
20.0251	-0.0151905	T0
20.0252	-0.0152178	T0
20.026	-0.0152593	T0
20.0266	-0.0153154	T0
20.0267	-0.0153825	T0
20.0281	-0.015466	T0
20.0275	-0.0155542	T0
20.0285	-0.0156759	T0
20.0296	-0.0158333	T0
20.0302	-0.016002	T0
20.0309	-0.016198	T0
20.0314	-0.0164572	T0
20.0315	-0.0167449	T0
20.0333	-0.0170587	T0
20.0338	-0.0174325	T0
20.0349	-0.0178345	T0
20.0359	-0.0182598	T0
20.0367	-0.0186499	T0
20.0384	-0.0190882	T0
20.0397	-0.0195102	T0
20.041	-0.0199685	T0
20.042	-0.0204111	T0
20.0429	-0.0208911	T0
20.044	-0.0213618	T0
20.045	-0.0219046	T0
20.0466	-0.0225076	T0
20.0481	-0.0231214	T0
20.0496	-0.0237359	T0
20.0509	-0.0243338	T0
20.0526	-0.024997	T0
20.0549	-0.0256222	T0
20.0567	-0.026283	T0
20.0583	-0.0269923	T0
20.0598	-0.0276169	T0
20.0624	-0.0283447	T0
20.0631	-0.0291298	T0
20.0653	-0.0299576	T0
20.0676	-0.0307804	T0
20.0694	-0.0316121	T0
20.0711	-0.0324799	T0
20.0735	-0.0334134	T0
20.0762	-0.0343686	T0
20.0789	-0.0353202	T0
20.0803	-0.0363681	T0
20.0828	-0.0373503	T0
20.0853	-0.0383609	T0
20.0877	-0.0394223	T0
20.0898	-0.0405388	T0
20.0926	-0.04164	T0
20.0951	-0.0427692	T0
20.0976	-0.0439387	T0
20.1002	-0.0451617	T0
20.1031	-0.0463649	T0
20.1065	-0.0475571	T0
20.109	-0.048863	T0
20.1121	-0.050094	T0
20.1147	-0.051356	T0
20.1174	-0.0526592	T0
20.1203	-0.0539416	T0
20.1232	-0.0552577	T0
20.1262	-0.0565623	T0
20.1289	-0.0579377	T0
20.1319	-0.0593541	T0
20.1346	-0.06079	T0
20.1381	-0.0622153	T0
20.1417	-0.063633	T0
20.1444	-0.0650988	T0
20.1481	-0.0664913	T0
20.152	-0.0679823	T0
20.1559	-0.0694381	T0
20.1593	-0.0709428	T0
20.163	-0.0724288	T0
20.166	-0.0739189	T0
20.1696	-0.07549	T0
20.1732	-0.0770357	T0
20.1768	-0.0785037	T0
20.1802	-0.0799922	T0
20.1841	-0.0815463	T0
20.1876	-0.0830253	T0
20.1917	-0.0845644	T0
20.1958	-0.0861037	T0
20.1998	-0.0876671	T0
20.2027	-0.0892456	T0
20.2075	-0.0908052	T0
20.211	-0.0924216	T0
20.215	-0.0940114	T0
20.2192	-0.0955231	T0
20.2231	-0.0970302	T0
20.2273	-0.0985732	T0
20.2314	-0.100067	T0
20.2348	-0.101622	T0
20.2391	-0.103187	T0
20.2434	-0.104765	T0
20.2473	-0.106275	T0
20.2517	-0.107846	T0
20.2565	-0.10943	T0
20.2604	-0.11098	T0
20.2648	-0.112496	T0
20.2696	-0.113959	T0
20.2732	-0.11548	T0
20.2775	-0.116932	T0
20.2825	-0.118438	T0
20.2868	-0.119974	T0
20.291	-0.121506	T0
20.2961	-0.122906	T0
20.3011	-0.12437	T0
20.3058	-0.125947	T0
20.3102	-0.12746	T0
20.3143	-0.128936	T0
20.3188	-0.13036	T0
20.3234	-0.131856	T0
20.3283	-0.133286	T0
20.3331	-0.134671	T0
20.3377	-0.136132	T0
20.3425	-0.137554	T0
20.3471	-0.138945	T0
20.352	-0.140276	T0
20.3567	-0.141706	T0
20.3613	-0.142989	T0
20.3662	-0.144361	T0
20.3716	-0.145756	T0
20.3765	-0.147141	T0
20.3821	-0.148539	T0
20.3867	-0.14987	T0
20.3914	-0.151243	T0
20.3966	-0.152595	T0
20.401	-0.153937	T0
20.4064	-0.155199	T0
20.4115	-0.156569	T0
20.4169	-0.157789	T0
20.422	-0.158969	T0
20.4273	-0.160197	T0
20.4317	-0.16145	T0
20.4377	-0.16268	T0
20.4423	-0.164006	T0
20.448	-0.165258	T0
20.453	-0.166505	T0
20.4581	-0.167751	T0
20.4634	-0.168978	T0
20.4694	-0.170263	T0
20.4739	-0.171482	T0
20.4794	-0.172718	T0
20.4844	-0.173863	T0
20.4902	-0.17504	T0
20.4958	-0.176195	T0
20.5009	-0.177332	T0
20.5064	-0.17842	T0
20.5119	-0.179518	T0
20.5174	-0.180681	T0
20.5228	-0.181744	T0
20.528	-0.182846	T0
20.5336	-0.183942	T0
20.5386	-0.185079	T0
20.5445	-0.186247	T0
20.5494	-0.187358	T0
20.5557	-0.188434	T0
20.5613	-0.18954	T0
20.567	-0.190573	T0
20.5727	-0.191614	T0
20.5782	-0.192637	T0
20.5843	-0.193651	T0
20.5906	-0.194688	T0
20.5959	-0.195771	T0
20.6003	-0.196824	T0
20.6069	-0.197885	T0
20.613	-0.198881	T0
20.6182	-0.199873	T0
20.6232	-0.200941	T0
20.63	-0.201949	T0
20.6355	-0.202909	T0
20.6414	-0.203836	T0
20.6475	-0.204785	T0
20.6538	-0.205784	T0
20.6592	-0.206824	T0
20.6649	-0.207832	T0
20.671	-0.208814	T0
20.677	-0.209736	T0
20.6828	-0.210632	T0
20.6888	-0.211609	T0
20.6948	-0.212569	T0
20.7007	-0.213404	T0
20.7067	-0.214278	T0
20.7126	-0.215183	T0
20.7188	-0.216148	T0
20.7246	-0.217031	T0
20.7302	-0.217934	T0
20.7362	-0.218868	T0
20.7426	-0.219747	T0
20.7486	-0.220597	T0
20.7552	-0.221479	T0
20.7615	-0.222309	T0
20.7675	-0.223071	T0
20.7734	-0.223846	T0
20.7798	-0.224627	T0
20.7861	-0.225502	T0
20.7927	-0.226357	T0
20.7988	-0.227167	T0
20.8049	-0.228004	T0
20.8111	-0.228838	T0
20.8169	-0.229649	T0
20.8233	-0.230487	T0
20.8297	-0.231325	T0
20.8357	-0.232156	T0
20.8413	-0.232919	T0
20.8481	-0.233679	T0
20.8548	-0.234518	T0
20.8612	-0.23537	T0
20.8676	-0.236122	T0
20.8738	-0.236892	T0
20.8806	-0.237599	T0
20.887	-0.238347	T0
20.8934	-0.239074	T0
20.8997	-0.239773	T0
20.9059	-0.240528	T0
20.9123	-0.241246	T0
20.9188	-0.242012	T0
20.9251	-0.242784	T0
20.9318	-0.243535	T0
20.9376	-0.244218	T0
20.9444	-0.2449	T0
20.951	-0.245547	T0
20.9578	-0.246223	T0
20.9646	-0.24682	T0
20.9707	-0.247445	T0
20.9772	-0.248194	T0
20.9841	-0.24888	T0
20.9905	-0.24959	T0
20.9972	-0.250296	T0
21.0037	-0.251058	T0
21.011	-0.251769	T0
21.0172	-0.252504	T0
21.0233	-0.253178	T0
21.0298	-0.25385	T0
21.0368	-0.254517	T0
21.0435	-0.255207	T0
21.0499	-0.255848	T0
21.0572	-0.256436	T0
21.0638	-0.257022	T0
21.0707	-0.257612	T0
21.0774	-0.258191	T0
21.0838	-0.25881	T0
21.0898	-0.259387	T0
21.0967	-0.259971	T0
21.1039	-0.260557	T0
21.1104	-0.261214	T0
21.1173	-0.261909	T0
21.124	-0.262568	T0
21.1307	-0.263094	T0
21.1376	-0.26376	T0
21.1447	-0.26433	T0
21.1512	-0.264803	T0
21.1577	-0.265441	T0
21.1653	-0.266015	T0
21.1722	-0.266607	T0
21.1782	-0.267235	T0
21.1854	-0.267838	T0
21.1924	-0.268347	T0
21.1991	-0.268914	T0
21.2067	-0.269425	T0
21.213	-0.269972	T0
21.2202	-0.270463	T0
21.2268	-0.270929	T0
21.2339	-0.27145	T0
21.2404	-0.271976	T0
21.2475	-0.272503	T0
21.2545	-0.273139	T0
21.2617	-0.273772	T0
21.2681	-0.274325	T0
21.2753	-0.274873	T0
21.2824	-0.275344	T0
21.2897	-0.275812	T0
21.2966	-0.276311	T0
21.3037	-0.276865	T0
21.3106	-0.277285	T0
21.3185	-0.277751	T0
21.3245	-0.278195	T0
21.3318	-0.278704	T0
21.3387	-0.279231	T0
21.3458	-0.279798	T0
21.3527	-0.28024	T0
21.3599	-0.280723	T0
21.3677	-0.281148	T0
21.374	-0.281623	T0
21.3814	-0.282114	T0
21.3888	-0.282542	T0
21.396	-0.283052	T0
21.403	-0.283554	T0
21.4099	-0.284016	T0
21.417	-0.284465	T0
21.4242	-0.284909	T0
21.4314	-0.28539	T0
21.4382	-0.285817	T0
21.4454	-0.286237	T0
21.4526	-0.286641	T0
21.46	-0.287038	T0
21.4672	-0.287479	T0
21.4744	-0.287955	T0
21.4816	-0.288383	T0
21.4883	-0.288873	T0
21.4954	-0.289282	T0
21.5029	-0.289741	T0
21.5104	-0.290234	T0
21.5176	-0.290718	T0
21.5251	-0.291086	T0
21.5326	-0.291458	T0
21.5397	-0.291805	T0
21.5467	-0.292211	T0
21.5542	-0.292525	T0
21.5615	-0.292894	T0
21.5685	-0.293322	T0
21.576	-0.293683	T0
21.5835	-0.294084	T0
21.5906	-0.294526	T0
21.5976	-0.294938	T0
21.6052	-0.29535	T0
21.6127	-0.295749	T0
21.6202	-0.296132	T0
21.6271	-0.296495	T0
21.6347	-0.296868	T0
21.6416	-0.297245	T0
21.6491	-0.297628	T0
21.6566	-0.297958	T0
21.6635	-0.298302	T0
21.671	-0.298701	T0
21.6784	-0.29908	T0
21.6856	-0.299424	T0
21.6931	-0.29981	T0
21.7007	-0.300159	T0
21.7086	-0.30045	T0
21.7157	-0.300753	T0
21.7232	-0.301039	T0
21.7305	-0.301364	T0
21.7381	-0.301653	T0
21.7447	-0.301968	T0
21.7526	-0.302353	T0
21.7596	-0.302715	T0
21.7673	-0.303095	T0
21.7751	-0.303468	T0
21.7824	-0.303805	T0
21.7901	-0.304135	T0
21.7971	-0.304462	T0
21.8047	-0.304751	T0
21.8125	-0.305039	T0
21.8191	-0.305366	T0
21.8267	-0.30567	T0
21.8347	-0.306004	T0
21.8421	-0.306319	T0
21.8499	-0.306666	T0
21.8572	-0.306921	T0
21.8643	-0.307258	T0
21.8716	-0.307537	T0
21.8794	-0.307818	T0
21.8869	-0.308124	T0
21.8945	-0.308366	T0
21.9021	-0.308693	T0
21.9102	-0.308967	T0
21.9179	-0.309271	T0
21.9251	-0.309605	T0
21.9327	-0.310002	T0
21.94	-0.310303	T0
21.9471	-0.310644	T0
21.9549	-0.310899	T0
21.9622	-0.311133	T0
21.9702	-0.311344	T0
21.9776	-0.311491	T0
21.9847	-0.311695	T0
21.9931	-0.311941	T0
22.0002	-0.312132	T0
22.008	-0.312367	T0
22.0155	-0.312774	T0
22.0229	-0.313151	T0
22.0304	-0.313536	T0
22.0383	-0.313854	T0
22.0452	-0.314153	T0
22.0533	-0.314463	T0
22.0618	-0.314627	T0
22.0691	-0.314784	T0
22.0769	-0.315053	T0
22.0837	-0.315246	T0
22.0921	-0.315436	T0
22.0997	-0.315697	T0
22.1072	-0.315946	T0
22.1147	-0.316187	T0
22.1229	-0.316413	T0
22.1299	-0.316647	T0
22.1379	-0.316923	T0
22.1452	-0.317141	T0
22.1534	-0.31732	T0
22.161	-0.317534	T0
22.1683	-0.317858	T0
22.1759	-0.318151	T0
22.183	-0.318369	T0
22.1919	-0.318543	T0
22.1994	-0.318756	T0
22.207	-0.319064	T0
22.2149	-0.319261	T0
22.2228	-0.319456	T0
22.2306	-0.319696	T0
22.2383	-0.319886	T0
22.2457	-0.320108	T0
22.2532	-0.320415	T0
22.261	-0.32066	T0
22.2681	-0.320964	T0
22.2763	-0.32113	T0
22.2845	-0.321214	T0
22.2919	-0.321485	T0
22.2994	-0.32161	T0
22.3075	-0.321707	T0
22.3149	-0.321864	T0
22.3231	-0.322052	T0
22.3307	-0.322337	T0
22.3381	-0.322573	T0
22.3457	-0.322809	T0
22.3532	-0.323123	T0
22.3615	-0.323388	T0
22.3691	-0.323632	T0
22.3767	-0.323851	T0
22.3846	-0.324078	T0
22.3924	-0.324225	T0
22.4003	-0.324389	T0
22.4085	-0.32449	T0
22.4163	-0.324688	T0
22.4243	-0.324837	T0
22.4319	-0.324918	T0
22.4397	-0.325088	T0
22.4473	-0.325182	T0
22.4554	-0.325406	T0
22.4631	-0.325577	T0
22.4705	-0.325759	T0
22.4784	-0.325981	T0
22.4858	-0.326256	T0
22.494	-0.326476	T0
22.5016	-0.326737	T0
22.5097	-0.326977	T0
22.5176	-0.327076	T0
22.5253	-0.327189	T0
22.5333	-0.32737	T0
22.5409	-0.327554	T0
22.549	-0.327675	T0
22.5566	-0.327741	T0
22.5646	-0.327878	T0
22.5728	-0.328029	T0
22.5807	-0.32828	T0
22.588	-0.32858	T0
22.5958	-0.328796	T0
22.6041	-0.328951	T0
22.6116	-0.329028	T0
22.6195	-0.329208	T0
22.6276	-0.329467	T0
22.6354	-0.329608	T0
22.6437	-0.329713	T0
22.651	-0.329917	T0
22.6593	-0.330022	T0
22.6668	-0.330187	T0
22.6741	-0.330303	T0
22.6826	-0.330472	T0
22.6903	-0.330552	T0
22.6984	-0.33064	T0
22.7064	-0.330782	T0
22.7143	-0.330893	T0
22.7223	-0.331054	T0
22.7302	-0.331189	T0
22.7377	-0.331359	T0
22.7458	-0.331553	T0
22.7534	-0.331758	T0
22.7616	-0.331913	T0
22.7693	-0.332162	T0
22.7771	-0.332249	T0
22.7859	-0.332373	T0
22.7935	-0.332543	T0
22.8016	-0.332671	T0
22.8091	-0.332789	T0
22.8166	-0.332905	T0
22.8245	-0.333013	T0
22.8326	-0.33315	T0
22.8402	-0.333252	T0
22.8486	-0.333409	T0
22.8571	-0.333588	T0
22.8649	-0.333738	T0
22.8718	-0.333861	T0
22.8805	-0.333999	T0
22.8879	-0.334104	T0
22.8969	-0.334247	T0
22.9047	-0.33437	T0
22.9122	-0.33453	T0
22.9208	-0.334669	T0
22.9282	-0.334761	T0
22.9358	-0.334823	T0
22.9445	-0.334925	T0
22.9523	-0.335081	T0
22.9603	-0.335221	T0
22.9678	-0.335311	T0
22.9755	-0.335437	T0
22.9837	-0.33558	T0
22.992	-0.335727	T0
23.0001	-0.335914	T0
23.0081	-0.336098	T0
23.016	-0.33624	T0
23.0236	-0.336293	T0
23.0322	-0.336373	T0
23.0397	-0.336477	T0
23.0477	-0.336564	T0
23.0557	-0.336649	T0
23.0638	-0.336743	T0
23.0716	-0.336859	T0
23.0797	-0.336986	T0
23.0876	-0.337107	T0
23.0956	-0.337263	T0
23.1039	-0.337416	T0
23.1119	-0.337539	T0
23.1199	-0.337668	T0
23.1272	-0.337769	T0
23.1355	-0.337862	T0
23.1434	-0.337943	T0
23.1517	-0.337995	T0
23.1595	-0.338052	T0
23.1671	-0.338146	T0
23.1755	-0.33824	T0
23.1838	-0.338346	T0
23.1922	-0.33846	T0
23.2002	-0.338568	T0
23.2081	-0.338699	T0
23.2158	-0.338827	T0
23.2238	-0.338964	T0
23.2325	-0.339093	T0
23.2398	-0.339182	T0
23.2485	-0.339271	T0
23.2564	-0.339368	T0
23.2643	-0.339474	T0
23.2721	-0.339569	T0
23.2802	-0.339675	T0
23.2877	-0.339791	T0
23.2962	-0.339901	T0
23.3041	-0.33998	T0
23.3125	-0.340097	T0
23.3205	-0.340216	T0
23.3284	-0.340346	T0
23.3363	-0.340448	T0
23.3448	-0.340546	T0
23.3528	-0.340634	T0
23.3608	-0.340728	T0
23.3687	-0.340801	T0
23.3766	-0.34089	T0
23.3847	-0.340984	T0
23.3927	-0.341064	T0
23.4006	-0.341142	T0
23.4089	-0.341222	T0
23.4173	-0.3413	T0
23.4253	-0.341372	T0
23.4333	-0.341433	T0
23.4415	-0.3415	T0
23.4492	-0.341582	T0
23.4577	-0.34165	T0
23.4656	-0.341743	T0
23.4735	-0.341843	T0
23.4819	-0.341962	T0
23.4899	-0.342115	T0
23.4979	-0.342224	T0
23.5059	-0.342324	T0
23.514	-0.342434	T0
23.5222	-0.342512	T0
23.5307	-0.342572	T0
23.5382	-0.342611	T0
23.5472	-0.342651	T0
23.5552	-0.342693	T0
23.5631	-0.342735	T0
23.5707	-0.342804	T0
23.5791	-0.342901	T0
23.5869	-0.342991	T0
23.5954	-0.343094	T0
23.6034	-0.343203	T0
23.6111	-0.343303	T0
23.6197	-0.343405	T0
23.6278	-0.343479	T0
23.6357	-0.343545	T0
23.6437	-0.343616	T0
23.6522	-0.343683	T0
23.6599	-0.343762	T0
23.6682	-0.343843	T0
23.6766	-0.343915	T0
23.6842	-0.344	T0
23.6928	-0.344055	T0
23.7008	-0.344099	T0
23.7095	-0.344167	T0
23.7172	-0.344252	T0
23.7257	-0.344339	T0
23.7328	-0.344448	T0
23.7414	-0.344552	T0
23.7499	-0.344642	T0
23.757	-0.344728	T0
23.7654	-0.344813	T0
23.7741	-0.344895	T0
23.782	-0.344959	T0
23.7899	-0.345003	T0
23.7984	-0.345059	T0
23.806	-0.345095	T0
23.8146	-0.34514	T0
23.8232	-0.345185	T0
23.831	-0.345239	T0
23.8393	-0.345303	T0
23.847	-0.345369	T0
23.8556	-0.345424	T0
23.8632	-0.34547	T0
23.8718	-0.345508	T0
23.8801	-0.345537	T0
23.8877	-0.345563	T0
23.8963	-0.345587	T0
23.9038	-0.345614	T0
23.9123	-0.345641	T0
23.9202	-0.345696	T0
23.9289	-0.345776	T0
23.9368	-0.345879	T0
23.9453	-0.345994	T0
23.953	-0.346099	T0
23.9612	-0.346184	T0
23.9691	-0.346234	T0
23.9771	-0.346271	T0
23.9854	-0.346306	T0
23.994	-0.346338	T0
24.0022	-0.346373	T0
24.0099	-0.346402	T0
24.0186	-0.346429	T0
24.0268	-0.346461	T0
24.0346	-0.346498	T0
24.0431	-0.346556	T0
24.051	-0.346613	T0
24.059	-0.346667	T0
24.0667	-0.346716	T0
24.0756	-0.346763	T0
24.0833	-0.346827	T0
24.0917	-0.346887	T0
24.0998	-0.346946	T0
24.108	-0.346991	T0
24.1159	-0.34704	T0
24.1242	-0.347079	T0
24.1326	-0.347123	T0
24.1403	-0.347172	T0
24.1491	-0.347238	T0
24.1574	-0.347329	T0
24.1648	-0.347399	T0
24.1734	-0.34748	T0
24.1819	-0.347535	T0
24.1898	-0.347581	T0
24.1977	-0.347618	T0
24.2057	-0.347656	T0
24.2147	-0.34769	T0
24.2226	-0.347731	T0
24.2308	-0.347775	T0
24.2387	-0.347819	T0
24.2471	-0.347878	T0
24.2552	-0.347929	T0
24.2637	-0.347975	T0
24.272	-0.348014	T0
24.2799	-0.348056	T0
24.2884	-0.348095	T0
24.2966	-0.348136	T0
24.3046	-0.348182	T0
24.3127	-0.348231	T0
24.3208	-0.348268	T0
24.329	-0.348297	T0
24.3373	-0.348325	T0
24.3453	-0.34836	T0
24.3534	-0.3484	T0
24.3621	-0.34844	T0
24.3702	-0.348477	T0
24.3784	-0.348507	T0
24.3869	-0.348543	T0
24.3949	-0.348594	T0
24.4032	-0.348637	T0
24.4107	-0.348678	T0
24.4194	-0.348725	T0
24.427	-0.34876	T0
24.4357	-0.348799	T0
24.4439	-0.348835	T0
24.4516	-0.348886	T0
24.4604	-0.348931	T0
24.4679	-0.348967	T0
24.4769	-0.348988	T0
24.4847	-0.349013	T0
24.4932	-0.349038	T0
24.5013	-0.349067	T0
24.5096	-0.349101	T0
24.5176	-0.34913	T0
24.5262	-0.349167	T0
24.5334	-0.349211	T0
24.5424	-0.349261	T0
24.5504	-0.349302	T0
24.5586	-0.349332	T0
24.5663	-0.349362	T0
24.5755	-0.349388	T0
24.5832	-0.349419	T0
24.5911	-0.349452	T0
24.5997	-0.349488	T0
24.6074	-0.34953	T0
24.6164	-0.349571	T0
24.6244	-0.349607	T0
24.6327	-0.349645	T0
24.6411	-0.349673	T0
24.6491	-0.349697	T0
24.6572	-0.349726	T0
24.6659	-0.349754	T0
24.6735	-0.349777	T0
24.682	-0.349805	T0
24.6901	-0.349845	T0
24.6986	-0.349887	T0
24.7067	-0.349933	T0
24.7142	-0.349984	T0
24.7221	-0.350027	T0
24.7307	-0.350068	T0
24.7391	-0.350107	T0
24.7479	-0.350137	T0
24.7552	-0.350161	T0
24.764	-0.350181	T0
24.7722	-0.350213	T0
24.7804	-0.350254	T0
24.7885	-0.350294	T0
24.797	-0.350341	T0
24.8053	-0.350385	T0
24.8135	-0.350425	T0
24.8219	-0.350456	T0
24.8298	-0.350483	T0
24.838	-0.350504	T0
24.8465	-0.350519	T0
24.8546	-0.350538	T0
24.8632	-0.350561	T0
24.8715	-0.350586	T0
24.8793	-0.350616	T0
24.8881	-0.350659	T0
24.8961	-0.350701	T0
24.9042	-0.350735	T0
24.9129	-0.350763	T0
24.9206	-0.350787	T0
24.9285	-0.350813	T0
24.9371	-0.350833	T0
24.9453	-0.350854	T0
24.9532	-0.350886	T0
24.9615	-0.35092	T0
24.9699	-0.350957	T0
24.9777	-0.350986	T0
24.9865	-0.351007	T0
24.9947	-0.351029	T0
25.0031	-0.351044	T0
25.0113	-0.351059	T0
25.0189	-0.35107	T0
25.0273	-0.351086	T0
25.0355	-0.351102	T0
25.0441	-0.351122	T0
25.0524	-0.351145	T0
25.0604	-0.351172	T0
25.0694	-0.3512	T0
25.0776	-0.35123	T0
25.0857	-0.351259	T0
25.0938	-0.351292	T0
25.1019	-0.351332	T0
25.1102	-0.351375	T0
25.1184	-0.351409	T0
25.127	-0.351446	T0
25.1348	-0.351472	T0
25.1433	-0.351497	T0
25.1511	-0.351518	T0
25.1597	-0.351539	T0
25.1677	-0.351562	T0
25.1761	-0.351587	T0
25.1842	-0.351625	T0
25.1927	-0.351666	T0
25.2008	-0.351707	T0
25.2097	-0.351736	T0
25.2173	-0.351771	T0
25.2263	-0.351797	T0
25.2337	-0.351815	T0
25.2421	-0.351829	T0
25.2501	-0.35184	T0
25.2586	-0.351858	T0
25.2667	-0.351875	T0
25.2752	-0.351891	T0
25.2839	-0.35191	T0
25.2918	-0.351931	T0
25.3002	-0.351956	T0
25.3086	-0.351973	T0
25.3166	-0.35199	T0
25.3252	-0.352008	T0
25.3334	-0.352023	T0
25.3419	-0.352038	T0
25.3495	-0.352055	T0
25.3586	-0.35207	T0
25.3664	-0.352082	T0
25.3748	-0.352097	T0
25.3823	-0.352114	T0
25.391	-0.352136	T0
25.3991	-0.352156	T0
25.4074	-0.352174	T0
25.4156	-0.352194	T0
25.4238	-0.35221	T0
25.4322	-0.352225	T0
25.4403	-0.35224	T0
25.4487	-0.35225	T0
25.4576	-0.352263	T0
25.4652	-0.352274	T0
25.4735	-0.352285	T0
25.4813	-0.352296	T0
25.4905	-0.352316	T0
25.4985	-0.352334	T0
25.507	-0.352358	T0
25.5149	-0.352386	T0
25.5232	-0.352409	T0
25.532	-0.35244	T0
25.54	-0.352466	T0
25.5482	-0.35249	T0
25.5563	-0.352507	T0
25.5644	-0.352519	T0
25.5729	-0.352541	T0
25.5811	-0.352565	T0
25.5895	-0.352583	T0
25.5979	-0.352601	T0
25.6058	-0.352623	T0
25.6146	-0.35264	T0
25.6225	-0.352652	T0
25.6313	-0.352668	T0
25.6395	-0.35268	T0
25.6469	-0.352692	T0
25.6556	-0.352704	T0
25.6637	-0.352716	T0
25.672	-0.352725	T0
25.6808	-0.352735	T0
25.6886	-0.352747	T0
25.6976	-0.352762	T0
25.7051	-0.352778	T0
25.7143	-0.352788	T0
25.7226	-0.352799	T0
25.7302	-0.352818	T0
25.7387	-0.352852	T0
25.7472	-0.352885	T0
25.7554	-0.352916	T0
25.7637	-0.35294	T0
25.7718	-0.352963	T0
25.7803	-0.352986	T0
25.7887	-0.353012	T0
25.7969	-0.353038	T0
25.8051	-0.353059	T0
25.8133	-0.353073	T0
25.8214	-0.353092	T0
25.8298	-0.35311	T0
25.8383	-0.353123	T0
25.8459	-0.353134	T0
25.8537	-0.353141	T0
25.863	-0.353156	T0
25.8709	-0.353174	T0
25.8797	-0.353193	T0
25.888	-0.353219	T0
25.896	-0.353242	T0
25.9043	-0.353261	T0
25.9124	-0.353278	T0
25.921	-0.353293	T0
25.9291	-0.353307	T0
25.9377	-0.353323	T0
25.9461	-0.353339	T0
25.9536	-0.353356	T0
25.9623	-0.353373	T0
25.9701	-0.353384	T0
25.9784	-0.353397	T0
25.9878	-0.353408	T0
25.9954	-0.353421	T0
26.0045	-0.353429	T0
26.0125	-0.353436	T0
26.0211	-0.353445	T0
26.0292	-0.353454	T0
26.0376	-0.353461	T0
26.0458	-0.353473	T0
26.0538	-0.35349	T0
26.0619	-0.353507	T0
26.0699	-0.353532	T0
26.0788	-0.353557	T0
26.0874	-0.353578	T0
26.0951	-0.353601	T0
26.103	-0.353616	T0
26.1119	-0.353631	T0
26.1199	-0.35365	T0
26.128	-0.353668	T0
26.1365	-0.353679	T0
26.1446	-0.353689	T0
26.1528	-0.353696	T0
26.1611	-0.353704	T0
26.1697	-0.353712	T0
26.1784	-0.353722	T0
26.1865	-0.353733	T0
26.1953	-0.353743	T0
26.2036	-0.353756	T0
26.212	-0.353775	T0
26.2199	-0.353799	T0
26.2281	-0.353822	T0
26.2364	-0.353835	T0
26.2448	-0.353842	T0
26.2535	-0.35385	T0
26.2615	-0.353858	T0
26.27	-0.353867	T0
26.2776	-0.353878	T0
26.2855	-0.353887	T0
26.2944	-0.353896	T0
26.3029	-0.353907	T0
26.3111	-0.353917	T0
26.3199	-0.353932	T0
26.3277	-0.353948	T0
26.3362	-0.35396	T0
26.3436	-0.353971	T0
26.353	-0.35398	T0
26.3607	-0.353992	T0
26.3696	-0.354001	T0
26.3775	-0.354008	T0
26.3854	-0.354015	T0
26.3939	-0.354021	T0
26.4025	-0.354029	T0
26.4106	-0.354036	T0
26.4191	-0.354044	T0
26.4271	-0.354052	T0
26.4355	-0.354064	T0
26.4443	-0.354075	T0
26.4527	-0.354087	T0
26.4611	-0.354097	T0
26.4689	-0.35411	T0
26.4779	-0.354127	T0
26.486	-0.354143	T0
26.4943	-0.35416	T0
26.5032	-0.354176	T0
26.5104	-0.354191	T0
26.5187	-0.3542	T0
26.5264	-0.354208	T0
26.5354	-0.354221	T0
26.5439	-0.354237	T0
26.5519	-0.354252	T0
26.5602	-0.354263	T0
26.5689	-0.354273	T0
26.5776	-0.354283	T0
26.586	-0.354294	T0
26.5939	-0.354302	T0
26.6019	-0.354314	T0
26.6106	-0.354325	T0
26.619	-0.354335	T0
26.6274	-0.354345	T0
26.6357	-0.354353	T0
26.6437	-0.354361	T0
26.6517	-0.354368	T0
26.6601	-0.354376	T0
26.6685	-0.354383	T0
26.6767	-0.35439	T0
26.6847	-0.354396	T0
26.6932	-0.354403	T0
26.7015	-0.354409	T0
26.71	-0.354416	T0
26.7181	-0.354422	T0
26.7272	-0.354428	T0
26.7349	-0.354435	T0
26.7433	-0.354442	T0
26.7512	-0.35445	T0
26.7599	-0.354458	T0
26.7682	-0.35447	T0
26.7764	-0.354481	T0
26.785	-0.354489	T0
26.7929	-0.3545	T0
26.801	-0.354507	T0
26.8092	-0.354514	T0
26.8179	-0.354521	T0
26.8263	-0.354528	T0
26.8346	-0.354534	T0
26.8432	-0.354541	T0
26.8512	-0.354548	T0
26.86	-0.354556	T0
26.8671	-0.354564	T0
26.876	-0.354574	T0
26.8849	-0.354585	T0
26.8928	-0.354593	T0
26.9012	-0.3546	T0
26.9098	-0.354607	T0
26.9178	-0.354614	T0
26.926	-0.354621	T0
26.9342	-0.354629	T0
26.9426	-0.354638	T0
26.9506	-0.354651	T0
26.959	-0.354657	T0
26.9678	-0.354665	T0
26.976	-0.354672	T0
26.9838	-0.354679	T0
26.9923	-0.354687	T0
27.0008	-0.354695	T0
27.0097	-0.354703	T0
27.0175	-0.35471	T0
27.0264	-0.354717	T0
27.034	-0.354724	T0
27.0425	-0.354731	T0
27.0509	-0.354738	T0
27.0597	-0.354744	T0
27.0676	-0.354751	T0
27.0755	-0.354758	T0
27.0842	-0.354765	T0
27.0923	-0.354773	T0
27.1011	-0.354782	T0
27.1096	-0.354792	T0
27.1175	-0.354803	T0
27.1257	-0.354809	T0
27.1338	-0.354817	T0
27.142	-0.354823	T0
27.1506	-0.354829	T0
27.159	-0.354835	T0
27.1675	-0.354842	T0
27.1757	-0.354848	T0
27.1837	-0.354855	T0
27.1926	-0.354862	T0
27.2007	-0.35487	T0
27.2083	-0.354882	T0
27.2172	-0.354897	T0
27.2256	-0.35491	T0
27.2344	-0.354923	T0
27.2425	-0.354935	T0
27.2507	-0.354944	T0
27.2591	-0.354951	T0
27.2672	-0.354957	T0
27.2751	-0.354963	T0
27.2837	-0.354969	T0
27.2918	-0.354975	T0
27.3006	-0.354981	T0
27.3084	-0.354988	T0
27.3173	-0.354995	T0
27.3249	-0.355002	T0
27.3336	-0.355009	T0
27.3418	-0.355017	T0
27.3503	-0.355028	T0
27.3585	-0.355037	T0
27.3665	-0.355045	T0
27.3752	-0.355053	T0
27.3837	-0.355066	T0
27.3922	-0.355075	T0
27.4005	-0.355082	T0
27.4084	-0.355089	T0
27.4167	-0.355099	T0
27.4251	-0.355106	T0
27.4333	-0.355113	T0
27.4419	-0.35512	T0
27.4503	-0.355127	T0
27.4585	-0.355134	T0
27.4669	-0.35514	T0
27.4754	-0.355145	T0
27.4836	-0.355149	T0
27.4918	-0.355154	T0
27.5002	-0.355157	T0
27.5086	-0.355162	T0
27.5167	-0.355167	T0
27.5252	-0.355172	T0
27.5335	-0.355178	T0
27.5418	-0.355185	T0
27.5496	-0.355196	T0
27.5578	-0.355208	T0
27.5665	-0.355215	T0
27.575	-0.355222	T0
27.5832	-0.355229	T0
27.5921	-0.355236	T0
27.6001	-0.355243	T0
27.6084	-0.355249	T0
27.6165	-0.355256	T0
27.625	-0.355262	T0
27.6335	-0.355269	T0
27.642	-0.355274	T0
27.6497	-0.35528	T0
27.6581	-0.355285	T0
27.6662	-0.355289	T0
27.6746	-0.355294	T0
27.6827	-0.355299	T0
27.6911	-0.355304	T0
27.7	-0.35531	T0
27.7077	-0.355316	T0
27.7161	-0.355323	T0
27.7246	-0.355329	T0
27.7335	-0.355335	T0
27.7419	-0.35534	T0
27.7494	-0.355346	T0
27.7582	-0.355352	T0
27.7666	-0.355358	T0
27.7748	-0.355367	T0
27.7827	-0.355377	T0
27.7913	-0.355387	T0
27.7995	-0.355398	T0
27.8081	-0.355406	T0
27.8164	-0.355413	T0
27.8242	-0.355418	T0
27.8326	-0.355423	T0
27.8412	-0.355427	T0
27.8497	-0.355431	T0
27.8576	-0.355435	T0
27.8659	-0.355438	T0
27.8745	-0.355442	T0
27.8829	-0.355447	T0
27.891	-0.355452	T0
27.8995	-0.355458	T0
27.9079	-0.355466	T0
27.9162	-0.355471	T0
27.9248	-0.355477	T0
27.9323	-0.355483	T0
27.9409	-0.355488	T0
27.9494	-0.355494	T0
27.9576	-0.355499	T0
27.9661	-0.355504	T0
27.9742	-0.355509	T0
27.9829	-0.355515	T0
27.9912	-0.355521	T0
27.9998	-0.355527	T0
28.0076	-0.355533	T0
28.0161	-0.355538	T0
28.0244	-0.355543	T0
28.0328	-0.355547	T0
28.0411	-0.355552	T0
28.0497	-0.355556	T0
28.0574	-0.355561	T0
28.0658	-0.355566	T0
28.0742	-0.355572	T0
28.0824	-0.355578	T0
28.0907	-0.355584	T0
28.099	-0.355591	T0
28.1071	-0.3556	T0
28.1155	-0.35561	T0
28.1247	-0.355616	T0
28.1324	-0.355621	T0
28.1409	-0.355626	T0
28.1497	-0.355631	T0
28.1576	-0.355636	T0
28.1662	-0.355639	T0
28.1742	-0.355643	T0
28.1824	-0.355647	T0
28.1908	-0.355651	T0
28.1992	-0.355655	T0
28.207	-0.355661	T0
28.2162	-0.355667	T0
28.2241	-0.355674	T0
28.2325	-0.355683	T0
28.2411	-0.355694	T0
28.2495	-0.355706	T0
28.2572	-0.355712	T0
28.2658	-0.355717	T0
28.2742	-0.355722	T0
28.2831	-0.355727	T0
28.2911	-0.355731	T0
28.2993	-0.355735	T0
28.3074	-0.35574	T0
28.3155	-0.355745	T0
28.3243	-0.35575	T0
28.3323	-0.355756	T0
28.3409	-0.355762	T0
28.349	-0.355767	T0
28.3577	-0.355772	T0
28.366	-0.355778	T0
28.3739	-0.355784	T0
28.3825	-0.355791	T0
28.3912	-0.355798	T0
28.3993	-0.355803	T0
28.4074	-0.355808	T0
28.4156	-0.355813	T0
28.4243	-0.355818	T0
28.4324	-0.355823	T0
28.4409	-0.355827	T0
28.449	-0.355832	T0
28.4575	-0.355836	T0
28.4657	-0.355841	T0
28.4742	-0.355846	T0
28.4827	-0.355851	T0
28.4906	-0.355856	T0
28.4994	-0.355862	T0
28.5074	-0.355868	T0
28.5157	-0.355875	T0
28.5241	-0.355881	T0
28.5329	-0.355887	T0
28.5412	-0.355893	T0
28.5492	-0.355898	T0
28.5574	-0.355904	T0
28.5657	-0.35591	T0
28.5746	-0.355915	T0
28.5831	-0.35592	T0
28.5907	-0.355926	T0
28.5992	-0.355931	T0
28.6072	-0.355937	T0
28.616	-0.355942	T0
28.6243	-0.355947	T0
28.6325	-0.355952	T0
28.6403	-0.355957	T0
28.6488	-0.355962	T0
28.6576	-0.355968	T0
28.6656	-0.355973	T0
28.6744	-0.355978	T0
28.6826	-0.355984	T0
28.6913	-0.355989	T0
28.6988	-0.355995	T0
28.7078	-0.356001	T0
28.7154	-0.356009	T0
28.7244	-0.356015	T0
28.7328	-0.356021	T0
28.7409	-0.356027	T0
28.7496	-0.356034	T0
28.7575	-0.356041	T0
28.7666	-0.356046	T0
28.7746	-0.356051	T0
28.7825	-0.356057	T0
28.7909	-0.356062	T0
28.799	-0.356067	T0
28.8079	-0.356072	T0
28.8166	-0.356077	T0
28.8246	-0.356081	T0
28.8328	-0.356086	T0
28.8415	-0.356091	T0
28.8498	-0.356096	T0
28.8578	-0.356102	T0
28.8661	-0.356108	T0
28.8751	-0.356114	T0
28.8827	-0.35612	T0
28.8912	-0.356125	T0
28.8996	-0.35613	T0
28.9079	-0.356135	T0
28.9164	-0.356139	T0
28.9242	-0.356143	T0
28.9332	-0.356147	T0
28.9412	-0.356152	T0
28.9495	-0.356155	T0
28.9582	-0.356159	T0
28.9661	-0.356163	T0
28.9746	-0.356167	T0
28.9828	-0.356171	T0
28.991	-0.356175	T0
28.9997	-0.35618	T0
29.0086	-0.356184	T0
29.0163	-0.35619	T0
29.0239	-0.356197	T0
29.0328	-0.356206	T0
29.041	-0.356211	T0
29.0493	-0.356215	T0
29.058	-0.356219	T0
29.0659	-0.356223	T0
29.074	-0.356227	T0
29.0824	-0.356231	T0
29.0913	-0.356236	T0
29.0995	-0.356242	T0
29.1075	-0.356246	T0
29.1164	-0.356251	T0
29.1243	-0.356255	T0
29.1327	-0.356259	T0
29.141	-0.356263	T0
29.1498	-0.356267	T0
29.1586	-0.356272	T0
29.1664	-0.356276	T0
29.1741	-0.35628	T0
29.1827	-0.356284	T0
29.1911	-0.356287	T0
29.1999	-0.35629	T0
29.2081	-0.356294	T0
29.2168	-0.356297	T0
29.2246	-0.356301	T0
29.2332	-0.356305	T0
29.2415	-0.35631	T0
29.2501	-0.356314	T0
29.2578	-0.356318	T0
29.2665	-0.356321	T0
29.2748	-0.356324	T0
29.2825	-0.356326	T0
29.2913	-0.356328	T0
29.3	-0.35633	T0
29.3078	-0.356333	T0
29.317	-0.356334	T0
29.3247	-0.356337	T0
29.3328	-0.356341	T0
29.3411	-0.356344	T0
29.349	-0.356347	T0
29.3579	-0.35635	T0
29.3663	-0.356353	T0
29.3742	-0.356356	T0
29.3826	-0.356359	T0
29.3919	-0.356362	T0
29.3998	-0.356366	T0
29.4082	-0.356368	T0
29.4168	-0.356371	T0
29.4245	-0.356373	T0
29.4335	-0.356374	T0
29.4414	-0.356376	T0
29.45	-0.356377	T0
29.4584	-0.356379	T0
29.4659	-0.35638	T0
29.4744	-0.356383	T0
29.483	-0.356385	T0
29.4917	-0.356388	T0
29.4994	-0.356392	T0
29.5081	-0.356395	T0
29.5169	-0.356398	T0
29.5249	-0.356401	T0
29.533	-0.356403	T0
29.5418	-0.356404	T0
29.5498	-0.356406	T0
29.5579	-0.356408	T0
29.5664	-0.356409	T0
29.5745	-0.35641	T0
29.5832	-0.356411	T0
29.5912	-0.356413	T0
29.5995	-0.356416	T0
29.6082	-0.356418	T0
29.6161	-0.356421	T0
29.624	-0.356424	T0
29.6331	-0.356427	T0
29.641	-0.356429	T0
29.6499	-0.356431	T0
29.6583	-0.356433	T0
29.6666	-0.356435	T0
29.6747	-0.356437	T0
29.6829	-0.356438	T0
29.6914	-0.35644	T0
29.7001	-0.356442	T0
29.7081	-0.356444	T0
29.7163	-0.356447	T0
29.7243	-0.35645	T0
29.7328	-0.356453	T0
29.7414	-0.356455	T0
29.7498	-0.356458	T0
29.7582	-0.356461	T0
29.7668	-0.356464	T0
29.7742	-0.356467	T0
29.7832	-0.356469	T0
29.791	-0.356471	T0
29.7994	-0.356473	T0
29.8077	-0.356476	T0
29.8164	-0.356478	T0
29.8249	-0.35648	T0
29.8328	-0.356481	T0
29.8414	-0.356483	T0
29.8501	-0.356485	T0
29.8586	-0.356487	T0
29.867	-0.35649	T0
29.875	-0.356492	T0
29.883	-0.356494	T0
29.8913	-0.356496	T0
29.8995	-0.356498	T0
29.908	-0.3565	T0
29.9159	-0.356501	T0
29.9245	-0.356503	T0
29.9331	-0.356505	T0
29.9414	-0.356508	T0
29.9494	-0.35651	T0
29.9581	-0.356513	T0
29.9662	-0.356516	T0
29.9749	-0.356519	T0
29.9829	-0.356521	T0
29.9913	-0.356524	T0
29.9997	-0.356527	T0
30.0079	-0.356528	T0
30.0165	-0.35653	T0
30.0248	-0.356533	T0
30.0333	-0.356535	T0
30.0416	-0.356536	T0
30.0497	-0.356537	T0
30.0583	-0.356537	T0
30.0671	-0.356537	T0
30.0742	-0.356538	T0
30.0826	-0.356539	T0
30.0917	-0.356541	T0
30.0996	-0.356543	T0
30.1077	-0.356546	T0
30.1167	-0.356549	T0
30.125	-0.356551	T0
30.1327	-0.356554	T0
30.1417	-0.356557	T0
30.1495	-0.356559	T0
30.1582	-0.356562	T0
30.1669	-0.356566	T0
30.1752	-0.35657	T0
30.1835	-0.356573	T0
30.1916	-0.356577	T0
30.1996	-0.35658	T0
30.2083	-0.356582	T0
30.2166	-0.356585	T0
30.2249	-0.356586	T0
30.2335	-0.356588	T0
30.2416	-0.356589	T0
30.2498	-0.35659	T0
30.2587	-0.356592	T0
30.2667	-0.356595	T0
30.275	-0.356597	T0
30.2828	-0.3566	T0
30.2916	-0.356603	T0
30.3003	-0.356606	T0
30.3085	-0.356608	T0
30.3167	-0.356611	T0
30.3246	-0.356613	T0
30.3338	-0.356614	T0
30.3415	-0.356617	T0
30.3505	-0.356619	T0
30.3588	-0.356622	T0
30.3669	-0.356625	T0
30.3757	-0.356627	T0
30.3837	-0.35663	T0
30.3918	-0.356633	T0
30.4001	-0.356635	T0
30.4077	-0.356637	T0
30.4168	-0.356639	T0
30.4252	-0.35664	T0
30.4335	-0.356642	T0
30.4413	-0.356644	T0
30.4504	-0.356645	T0
30.4586	-0.356646	T0
30.4666	-0.356647	T0
30.4754	-0.356648	T0
30.4832	-0.356649	T0
30.4915	-0.35665	T0
30.5003	-0.356652	T0
30.5079	-0.356654	T0
30.5165	-0.356656	T0
30.5252	-0.356659	T0
30.5337	-0.356661	T0
30.5417	-0.356665	T0
30.5507	-0.356671	T0
30.5593	-0.356676	T0
30.5671	-0.356679	T0
30.5749	-0.35668	T0
30.5832	-0.356682	T0
30.5918	-0.356684	T0
30.6004	-0.356686	T0
30.6085	-0.356688	T0
30.6172	-0.356689	T0
30.6254	-0.356691	T0
30.6335	-0.356692	T0
30.6419	-0.356694	T0
30.6502	-0.356696	T0
30.6588	-0.356698	T0
30.6665	-0.3567	T0
30.6752	-0.356703	T0
30.6835	-0.356706	T0
30.6915	-0.356708	T0
30.7	-0.356711	T0
30.7087	-0.356714	T0
30.7168	-0.356717	T0
30.7253	-0.356719	T0
30.7334	-0.356721	T0
30.7415	-0.356722	T0
30.7503	-0.356724	T0
30.759	-0.356725	T0
30.7673	-0.356727	T0
30.7758	-0.356727	T0
30.7835	-0.356728	T0
30.7925	-0.35673	T0
30.7999	-0.35673	T0
30.8089	-0.356732	T0
30.8172	-0.356733	T0
30.8252	-0.356733	T0
30.8339	-0.356734	T0
30.8417	-0.356736	T0
30.8505	-0.356737	T0
30.8588	-0.356739	T0
30.8671	-0.356741	T0
30.8752	-0.356744	T0
30.8833	-0.356748	T0
30.8919	-0.356754	T0
30.9007	-0.35676	T0
30.9087	-0.356767	T0
30.9172	-0.356771	T0
30.9259	-0.356773	T0
30.9342	-0.356774	T0
30.9424	-0.356773	T0
30.9508	-0.356773	T0
30.9591	-0.356771	T0
30.9672	-0.356769	T0
30.9753	-0.356767	T0
30.9839	-0.356768	T0
30.9919	-0.35677	T0
31.0003	-0.356772	T0
31.0091	-0.356777	T0
31.0174	-0.356781	T0
31.0259	-0.356784	T0
31.0342	-0.356787	T0
31.0417	-0.35679	T0
31.0506	-0.356792	T0
31.0592	-0.356793	T0
31.0675	-0.356793	T0
31.0756	-0.356794	T0
31.084	-0.356794	T0
31.0927	-0.356793	T0
31.1007	-0.356792	T0
31.1093	-0.356792	T0
31.1174	-0.356792	T0
31.1263	-0.356793	T0
31.1339	-0.356795	T0
31.1428	-0.356797	T0
31.1508	-0.356801	T0
31.1595	-0.356804	T0
31.1678	-0.356806	T0
31.1764	-0.356809	T0
31.1845	-0.356811	T0
31.1929	-0.356812	T0
31.2008	-0.356813	T0
31.2092	-0.356813	T0
31.2178	-0.356814	T0
31.2268	-0.356814	T0
31.2343	-0.356814	T0
31.2431	-0.356815	T0
31.251	-0.356816	T0
31.2597	-0.356817	T0
31.2677	-0.356819	T0
31.2757	-0.35682	T0
31.2843	-0.356822	T0
31.2931	-0.356823	T0
31.3014	-0.356824	T0
31.3096	-0.356825	T0
31.318	-0.356826	T0
31.3266	-0.356827	T0
31.3345	-0.356828	T0
31.343	-0.356827	T0
31.3509	-0.356827	T0
31.3591	-0.356827	T0
31.3682	-0.356827	T0
31.3765	-0.356827	T0
31.3849	-0.356828	T0
31.393	-0.356828	T0
31.4012	-0.356828	T0
31.4093	-0.356829	T0
31.4179	-0.35683	T0
31.4262	-0.356831	T0
31.4344	-0.356832	T0
31.4429	-0.356832	T0
31.451	-0.356833	T0
31.4595	-0.356833	T0
31.4672	-0.356835	T0
31.4765	-0.356836	T0
31.4839	-0.356837	T0
31.493	-0.356838	T0
31.5016	-0.356839	T0
31.5104	-0.356841	T0
31.5181	-0.356842	T0
31.5265	-0.356843	T0
31.5353	-0.356843	T0
31.5431	-0.356843	T0
31.5511	-0.356843	T0
31.5593	-0.356842	T0
31.5682	-0.356841	T0
31.5764	-0.356841	T0
31.5847	-0.356842	T0
31.5933	-0.356842	T0
31.6015	-0.356844	T0
31.6095	-0.356846	T0
31.6176	-0.356848	T0
31.6267	-0.35685	T0
31.6348	-0.356852	T0
31.643	-0.356853	T0
31.6516	-0.356853	T0
31.6596	-0.356853	T0
31.6687	-0.356853	T0
31.6766	-0.356853	T0
31.6852	-0.356853	T0
31.6933	-0.356853	T0
31.7011	-0.356854	T0
31.7101	-0.356857	T0
31.718	-0.356859	T0
31.7264	-0.356863	T0
31.7345	-0.356867	T0
31.7431	-0.356869	T0
31.7517	-0.35687	T0
31.7603	-0.356871	T0
31.7683	-0.356871	T0
31.7765	-0.356869	T0
31.7851	-0.356865	T0
31.7936	-0.356865	T0
31.8016	-0.356865	T0
31.8101	-0.356865	T0
31.8183	-0.356865	T0
31.8266	-0.356866	T0
31.8351	-0.356866	T0
31.8431	-0.356867	T0
31.8511	-0.356869	T0
31.8596	-0.35687	T0
31.8683	-0.356872	T0
31.8763	-0.356874	T0
31.8852	-0.356876	T0
31.8937	-0.35688	T0
31.9012	-0.356881	T0
31.9104	-0.356882	T0
31.9181	-0.356884	T0
31.9265	-0.356884	T0
31.9355	-0.356885	T0
31.9434	-0.356886	T0
31.9522	-0.356887	T0
31.9598	-0.356889	T0
31.9681	-0.356891	T0
31.9769	-0.356893	T0
31.9847	-0.356895	T0
31.9927	-0.356897	T0
32.0016	-0.356898	T0
32.0096	-0.356899	T0
32.0188	-0.3569	T0
32.0268	-0.3569	T0
32.0346	-0.3569	T0
32.0435	-0.356901	T0
32.0521	-0.356902	T0
32.0601	-0.356903	T0
32.0691	-0.356904	T0
32.0767	-0.356905	T0
32.0852	-0.356907	T0
32.0931	-0.356908	T0
32.1021	-0.356909	T0
32.1106	-0.35691	T0
32.1188	-0.356911	T0
32.127	-0.356911	T0
32.1351	-0.356912	T0
32.1431	-0.356912	T0
32.1518	-0.356912	T0
32.1602	-0.356913	T0
32.1686	-0.356914	T0
32.1775	-0.356915	T0
32.1853	-0.356915	T0
32.1934	-0.356916	T0
32.2016	-0.356918	T0
32.2096	-0.356919	T0
32.2189	-0.356921	T0
32.2263	-0.356922	T0
32.2354	-0.356924	T0
32.2435	-0.356925	T0
32.2518	-0.356926	T0
32.2599	-0.356927	T0
32.2685	-0.356927	T0
32.277	-0.356928	T0
32.2853	-0.356929	T0
32.2937	-0.35693	T0
32.3022	-0.356932	T0
32.3101	-0.356933	T0
32.3185	-0.356935	T0
32.3269	-0.356938	T0
32.3355	-0.356939	T0
32.3439	-0.356942	T0
32.3519	-0.356943	T0
32.3603	-0.356945	T0
32.3691	-0.356947	T0
32.3766	-0.356947	T0
32.3856	-0.356948	T0
32.3938	-0.356949	T0
32.4025	-0.35695	T0
32.4108	-0.356951	T0
32.4185	-0.356953	T0
32.4269	-0.356956	T0
32.4355	-0.356957	T0
32.4439	-0.356959	T0
32.4529	-0.356961	T0
32.4598	-0.356963	T0
32.4688	-0.356965	T0
32.4767	-0.356966	T0
32.4853	-0.356967	T0
32.4941	-0.356969	T0
32.503	-0.35697	T0
32.5108	-0.356972	T0
32.5188	-0.356973	T0
32.5272	-0.356974	T0
32.5359	-0.356975	T0
32.5438	-0.356975	T0
32.5524	-0.356975	T0
32.561	-0.356976	T0
32.5685	-0.356976	T0
32.577	-0.356978	T0
32.5857	-0.35698	T0
32.5943	-0.356981	T0
32.6022	-0.356984	T0
32.6109	-0.356986	T0
32.6193	-0.356988	T0
32.6277	-0.356989	T0
32.6361	-0.35699	T0
32.644	-0.356992	T0
32.6526	-0.356994	T0
32.661	-0.356995	T0
32.6697	-0.356996	T0
32.678	-0.356998	T0
32.6868	-0.356999	T0
32.6943	-0.357001	T0
32.7031	-0.357002	T0
32.7107	-0.357002	T0
32.7192	-0.357002	T0
32.727	-0.357003	T0
32.736	-0.357005	T0
32.7437	-0.357006	T0
32.7519	-0.357006	T0
32.7602	-0.357006	T0
32.7687	-0.357007	T0
32.7773	-0.357008	T0
32.7857	-0.357009	T0
32.7944	-0.35701	T0
32.8027	-0.357012	T0
32.8113	-0.357013	T0
32.8195	-0.357014	T0
32.8277	-0.357015	T0
32.8363	-0.357017	T0
32.8443	-0.357018	T0
32.8523	-0.357019	T0
32.8609	-0.357019	T0
32.8694	-0.35702	T0
32.8779	-0.35702	T0
32.8862	-0.35702	T0
32.8948	-0.357021	T0
32.9028	-0.357022	T0
32.9113	-0.357023	T0
32.9195	-0.357024	T0
32.9274	-0.357024	T0
32.9361	-0.357025	T0
32.9447	-0.357026	T0
32.9525	-0.357027	T0
32.9613	-0.357028	T0
32.9695	-0.357029	T0
32.9781	-0.35703	T0
32.9864	-0.357031	T0
32.995	-0.357032	T0
33.0035	-0.357033	T0
33.0112	-0.357034	T0
33.0199	-0.357034	T0
33.0281	-0.357035	T0
33.0363	-0.357036	T0
33.0446	-0.357036	T0
33.0532	-0.357036	T0
33.0616	-0.357036	T0
33.0697	-0.357036	T0
33.0777	-0.357036	T0
33.0861	-0.357036	T0
33.0941	-0.357036	T0
33.1029	-0.357036	T0
33.1117	-0.357037	T0
33.12	-0.357039	T0
33.1282	-0.35704	T0
33.1368	-0.357042	T0
33.1449	-0.357043	T0
33.1532	-0.357044	T0
33.1615	-0.357045	T0
33.1702	-0.357045	T0
33.1785	-0.357045	T0
33.187	-0.357044	T0
33.1949	-0.357044	T0
33.2035	-0.357044	T0
33.2118	-0.357044	T0
33.2199	-0.357044	T0
33.2286	-0.357045	T0
33.2365	-0.357046	T0
33.2447	-0.357046	T0
33.2531	-0.357047	T0
33.2615	-0.357048	T0
33.2697	-0.357048	T0
33.2776	-0.357048	T0
33.2862	-0.357048	T0
33.2948	-0.357047	T0
33.3032	-0.357048	T0
33.3112	-0.357048	T0
33.3194	-0.357048	T0
33.3282	-0.357049	T0
33.3362	-0.35705	T0
33.3446	-0.357051	T0
33.3534	-0.357052	T0
33.3617	-0.357053	T0
33.3703	-0.357054	T0
33.3786	-0.357054	T0
33.3869	-0.357054	T0
33.3947	-0.357053	T0
33.4035	-0.357052	T0
33.4117	-0.357051	T0
33.4197	-0.357051	T0
33.428	-0.357051	T0
33.4365	-0.357051	T0
33.4447	-0.357051	T0
33.4532	-0.357052	T0
33.462	-0.357053	T0
33.4698	-0.357053	T0
33.4787	-0.357052	T0
33.487	-0.357052	T0
33.495	-0.357052	T0
33.5034	-0.357052	T0
33.5117	-0.357051	T0
33.5199	-0.35705	T0
33.5287	-0.357049	T0
33.5365	-0.357049	T0
33.5446	-0.357048	T0
33.5528	-0.357048	T0
33.5615	-0.357048	T0
33.5695	-0.357048	T0
33.5784	-0.357048	T0
33.5862	-0.357048	T0
33.5943	-0.357049	T0
33.6029	-0.35705	T0
33.6113	-0.357051	T0
33.6197	-0.357053	T0
33.628	-0.357056	T0
33.6367	-0.357058	T0
33.6448	-0.357059	T0
33.6536	-0.35706	T0
33.6618	-0.35706	T0
33.6702	-0.35706	T0
33.6784	-0.35706	T0
33.6873	-0.35706	T0
33.6953	-0.357061	T0
33.7031	-0.357061	T0
33.7119	-0.357062	T0
33.7201	-0.357063	T0
33.7288	-0.357064	T0
33.7363	-0.357065	T0
33.7451	-0.357064	T0
33.7533	-0.357065	T0
33.7621	-0.357064	T0
33.7703	-0.357064	T0
33.7786	-0.357065	T0
33.7873	-0.357067	T0
33.7955	-0.357068	T0
33.8037	-0.35707	T0
33.8117	-0.357071	T0
33.8206	-0.357072	T0
33.8278	-0.357073	T0
33.837	-0.357074	T0
33.8456	-0.357074	T0
33.8534	-0.357075	T0
33.8617	-0.357076	T0
33.8695	-0.357077	T0
33.8785	-0.357078	T0
33.8873	-0.357079	T0
33.8958	-0.357081	T0
33.9044	-0.357083	T0
33.9124	-0.357084	T0
33.9213	-0.357085	T0
33.9293	-0.357087	T0
33.9378	-0.357088	T0
33.9462	-0.357089	T0
33.9537	-0.357089	T0
33.9618	-0.35709	T0
33.9705	-0.35709	T0
33.9785	-0.35709	T0
33.9868	-0.35709	T0
33.995	-0.357091	T0
34.0034	-0.357092	T0
34.0119	-0.357094	T0
34.0201	-0.357095	T0
34.0288	-0.357096	T0
34.0372	-0.357098	T0
34.0456	-0.357098	T0
34.0538	-0.357099	T0
34.0629	-0.3571	T0
34.0715	-0.3571	T0
34.0787	-0.357101	T0
34.0871	-0.357101	T0
34.0957	-0.357102	T0
34.1042	-0.357103	T0
34.1124	-0.357103	T0
34.1207	-0.357104	T0
34.1291	-0.357105	T0
34.1372	-0.357106	T0
34.1458	-0.357107	T0
34.1543	-0.357108	T0
34.162	-0.357109	T0
34.1706	-0.35711	T0
34.1795	-0.35711	T0
34.1875	-0.357112	T0
34.196	-0.357113	T0
34.2041	-0.357115	T0
34.212	-0.357117	T0
34.2207	-0.357118	T0
34.2293	-0.35712	T0
34.237	-0.357121	T0
34.2456	-0.357122	T0
34.2537	-0.357123	T0
34.2627	-0.357124	T0
34.2704	-0.357125	T0
34.279	-0.357126	T0
34.2873	-0.357125	T0
34.2962	-0.357125	T0
34.304	-0.357126	T0
34.3127	-0.357127	T0
34.3216	-0.357127	T0
34.3294	-0.357127	T0
34.338	-0.357128	T0
34.3457	-0.357127	T0
34.3542	-0.357127	T0
34.3628	-0.357127	T0
34.3705	-0.357126	T0
34.379	-0.357125	T0
34.3877	-0.357126	T0
34.3955	-0.357126	T0
34.4037	-0.357128	T0
34.4129	-0.35713	T0
34.4211	-0.357132	T0
34.4292	-0.357134	T0
34.4378	-0.357135	T0
34.4456	-0.357136	T0
34.4541	-0.357136	T0
34.4627	-0.357135	T0
34.4713	-0.357135	T0
34.4796	-0.357133	T0
34.4878	-0.357133	T0
34.4966	-0.357133	T0
34.5046	-0.357134	T0
34.513	-0.357135	T0
34.5211	-0.357137	T0
34.5292	-0.357138	T0
34.5379	-0.357139	T0
34.5462	-0.35714	T0
34.5543	-0.35714	T0
34.5628	-0.357141	T0
34.5714	-0.357141	T0
34.5797	-0.357141	T0
34.5881	-0.357141	T0
34.5965	-0.357142	T0
34.6047	-0.357142	T0
34.6133	-0.357143	T0
34.6213	-0.357144	T0
34.6302	-0.357144	T0
34.638	-0.357145	T0
34.6467	-0.357146	T0
34.6548	-0.357147	T0
34.6629	-0.357147	T0
34.6712	-0.357148	T0
34.6795	-0.357149	T0
34.6879	-0.35715	T0
34.696	-0.357151	T0
34.7045	-0.357152	T0
34.7133	-0.357153	T0
34.721	-0.357153	T0
34.7297	-0.357153	T0
34.7385	-0.357153	T0
34.7464	-0.357153	T0
34.7554	-0.357153	T0
34.7632	-0.357154	T0
34.772	-0.357155	T0
34.7795	-0.357156	T0
34.7886	-0.357156	T0
34.797	-0.357157	T0
34.8052	-0.357157	T0
34.8135	-0.357157	T0
34.8217	-0.357157	T0
34.83	-0.357157	T0
34.8388	-0.357156	T0
34.8469	-0.357156	T0
34.8553	-0.357157	T0
34.8636	-0.357158	T0
34.8718	-0.357159	T0
34.8803	-0.35716	T0
34.8883	-0.357161	T0
34.8966	-0.357162	T0
34.905	-0.357163	T0
34.9136	-0.357164	T0
34.9216	-0.357164	T0
34.9298	-0.357164	T0
34.9386	-0.357164	T0
34.9469	-0.357165	T0
34.9551	-0.357165	T0
34.9633	-0.357165	T0
34.9718	-0.357165	T0
34.9801	-0.357166	T0
34.9881	-0.357166	T0
34.9962	-0.357166	T0
35.0054	-0.357167	T0
35.0134	-0.357168	T0
35.0218	-0.357168	T0
35.0298	-0.357169	T0
35.0381	-0.35717	T0
35.0461	-0.35717	T0
35.0547	-0.35717	T0
35.0637	-0.357169	T0
35.0717	-0.357168	T0
35.0804	-0.357168	T0
35.0883	-0.357168	T0
35.0968	-0.357168	T0
35.1057	-0.357168	T0
35.1135	-0.357169	T0
35.1223	-0.35717	T0
35.1298	-0.357171	T0
35.1386	-0.357172	T0
35.1472	-0.357172	T0
35.1563	-0.357173	T0
35.1642	-0.357173	T0
35.1728	-0.357174	T0
35.1802	-0.357175	T0
35.1888	-0.357175	T0
35.1972	-0.357175	T0
35.2054	-0.357176	T0
[truncated: 21,830 more rows]

## Sheet: AtLEA3-3_Sucrose
Temperature	Heat Flow (Normalized)	Sample
20.0195	-0.0151391	S0
20.0201	-0.0151395	S0
20.0194	-0.0151399	S0
20.0195	-0.0151406	S0
20.02	-0.0151412	S0
20.0198	-0.015142	S0
20.0199	-0.0151424	S0
20.0197	-0.0151429	S0
20.0198	-0.0151431	S0
20.0205	-0.0151433	S0
20.0199	-0.0151433	S0
20.02	-0.0151432	S0
20.0199	-0.0151433	S0
20.0202	-0.0151433	S0
20.02	-0.0151435	S0
20.0206	-0.0151437	S0
20.0207	-0.0151437	S0
20.0205	-0.0151438	S0
20.0208	-0.015144	S0
20.0212	-0.0151443	S0
20.021	-0.0151449	S0
20.0208	-0.0151456	S0
20.021	-0.0151466	S0
20.0218	-0.0151479	S0
20.0216	-0.0151492	S0
20.0216	-0.0151502	S0
20.0221	-0.0151514	S0
20.0228	-0.0151529	S0
20.023	-0.0151548	S0
20.0236	-0.0151586	S0
20.0242	-0.0151651	S0
20.0244	-0.0151742	S0
20.0251	-0.0151905	S0
20.0252	-0.0152178	S0
20.026	-0.0152593	S0
20.0266	-0.0153154	S0
20.0267	-0.0153825	S0
20.0281	-0.015466	S0
20.0275	-0.0155542	S0
20.0285	-0.0156759	S0
20.0296	-0.0158333	S0
20.0302	-0.016002	S0
20.0309	-0.016198	S0
20.0314	-0.0164572	S0
20.0315	-0.0167449	S0
20.0333	-0.0170587	S0
20.0338	-0.0174325	S0
20.0349	-0.0178345	S0
20.0359	-0.0182598	S0
20.0367	-0.0186499	S0
20.0384	-0.0190882	S0
20.0397	-0.0195102	S0
20.041	-0.0199685	S0
20.042	-0.0204111	S0
20.0429	-0.0208911	S0
20.044	-0.0213618	S0
20.045	-0.0219046	S0
20.0466	-0.0225076	S0
20.0481	-0.0231214	S0
20.0496	-0.0237359	S0
20.0509	-0.0243338	S0
20.0526	-0.024997	S0
20.0549	-0.0256222	S0
20.0567	-0.026283	S0
20.0583	-0.0269923	S0
20.0598	-0.0276169	S0
20.0624	-0.0283447	S0
20.0631	-0.0291298	S0
20.0653	-0.0299576	S0
20.0676	-0.0307804	S0
20.0694	-0.0316121	S0
20.0711	-0.0324799	S0
20.0735	-0.0334134	S0
20.0762	-0.0343686	S0
20.0789	-0.0353202	S0
20.0803	-0.0363681	S0
20.0828	-0.0373503	S0
20.0853	-0.0383609	S0
20.0877	-0.0394223	S0
20.0898	-0.0405388	S0
20.0926	-0.04164	S0
20.0951	-0.0427692	S0
20.0976	-0.0439387	S0
20.1002	-0.0451617	S0
20.1031	-0.0463649	S0
20.1065	-0.0475571	S0
20.109	-0.048863	S0
20.1121	-0.050094	S0
20.1147	-0.051356	S0
20.1174	-0.0526592	S0
20.1203	-0.0539416	S0
20.1232	-0.0552577	S0
20.1262	-0.0565623	S0
20.1289	-0.0579377	S0
20.1319	-0.0593541	S0
20.1346	-0.06079	S0
20.1381	-0.0622153	S0
20.1417	-0.063633	S0
20.1444	-0.0650988	S0
20.1481	-0.0664913	S0
20.152	-0.0679823	S0
20.1559	-0.0694381	S0
20.1593	-0.0709428	S0
20.163	-0.0724288	S0
20.166	-0.0739189	S0
20.1696	-0.07549	S0
20.1732	-0.0770357	S0
20.1768	-0.0785037	S0
20.1802	-0.0799922	S0
20.1841	-0.0815463	S0
20.1876	-0.0830253	S0
20.1917	-0.0845644	S0
20.1958	-0.0861037	S0
20.1998	-0.0876671	S0
20.2027	-0.0892456	S0
20.2075	-0.0908052	S0
20.211	-0.0924216	S0
20.215	-0.0940114	S0
20.2192	-0.0955231	S0
20.2231	-0.0970302	S0
20.2273	-0.0985732	S0
20.2314	-0.100067	S0
20.2348	-0.101622	S0
20.2391	-0.103187	S0
20.2434	-0.104765	S0
20.2473	-0.106275	S0
20.2517	-0.107846	S0
20.2565	-0.10943	S0
20.2604	-0.11098	S0
20.2648	-0.112496	S0
20.2696	-0.113959	S0
20.2732	-0.11548	S0
20.2775	-0.116932	S0
20.2825	-0.118438	S0
20.2868	-0.119974	S0
20.291	-0.121506	S0
20.2961	-0.122906	S0
20.3011	-0.12437	S0
20.3058	-0.125947	S0
20.3102	-0.12746	S0
20.3143	-0.128936	S0
20.3188	-0.13036	S0
20.3234	-0.131856	S0
20.3283	-0.133286	S0
20.3331	-0.134671	S0
20.3377	-0.136132	S0
20.3425	-0.137554	S0
20.3471	-0.138945	S0
20.352	-0.140276	S0
20.3567	-0.141706	S0
20.3613	-0.142989	S0
20.3662	-0.144361	S0
20.3716	-0.145756	S0
20.3765	-0.147141	S0
20.3821	-0.148539	S0
20.3867	-0.14987	S0
20.3914	-0.151243	S0
20.3966	-0.152595	S0
20.401	-0.153937	S0
20.4064	-0.155199	S0
20.4115	-0.156569	S0
20.4169	-0.157789	S0
20.422	-0.158969	S0
20.4273	-0.160197	S0
20.4317	-0.16145	S0
20.4377	-0.16268	S0
20.4423	-0.164006	S0
20.448	-0.165258	S0
20.453	-0.166505	S0
20.4581	-0.167751	S0
20.4634	-0.168978	S0
20.4694	-0.170263	S0
20.4739	-0.171482	S0
20.4794	-0.172718	S0
20.4844	-0.173863	S0
20.4902	-0.17504	S0
20.4958	-0.176195	S0
20.5009	-0.177332	S0
20.5064	-0.17842	S0
20.5119	-0.179518	S0
20.5174	-0.180681	S0
20.5228	-0.181744	S0
20.528	-0.182846	S0
20.5336	-0.183942	S0
20.5386	-0.185079	S0
20.5445	-0.186247	S0
20.5494	-0.187358	S0
20.5557	-0.188434	S0
20.5613	-0.18954	S0
20.567	-0.190573	S0
20.5727	-0.191614	S0
20.5782	-0.192637	S0
20.5843	-0.193651	S0
20.5906	-0.194688	S0
20.5959	-0.195771	S0
20.6003	-0.196824	S0
20.6069	-0.197885	S0
20.613	-0.198881	S0
20.6182	-0.199873	S0
20.6232	-0.200941	S0
20.63	-0.201949	S0
20.6355	-0.202909	S0
20.6414	-0.203836	S0
20.6475	-0.204785	S0
20.6538	-0.205784	S0
20.6592	-0.206824	S0
20.6649	-0.207832	S0
20.671	-0.208814	S0
20.677	-0.209736	S0
20.6828	-0.210632	S0
20.6888	-0.211609	S0
20.6948	-0.212569	S0
20.7007	-0.213404	S0
20.7067	-0.214278	S0
20.7126	-0.215183	S0
20.7188	-0.216148	S0
20.7246	-0.217031	S0
20.7302	-0.217934	S0
20.7362	-0.218868	S0
20.7426	-0.219747	S0
20.7486	-0.220597	S0
20.7552	-0.221479	S0
20.7615	-0.222309	S0
20.7675	-0.223071	S0
20.7734	-0.223846	S0
20.7798	-0.224627	S0
20.7861	-0.225502	S0
20.7927	-0.226357	S0
20.7988	-0.227167	S0
20.8049	-0.228004	S0
20.8111	-0.228838	S0
20.8169	-0.229649	S0
20.8233	-0.230487	S0
20.8297	-0.231325	S0
20.8357	-0.232156	S0
20.8413	-0.232919	S0
20.8481	-0.233679	S0
20.8548	-0.234518	S0
20.8612	-0.23537	S0
20.8676	-0.236122	S0
20.8738	-0.236892	S0
20.8806	-0.237599	S0
20.887	-0.238347	S0
20.8934	-0.239074	S0
20.8997	-0.239773	S0
20.9059	-0.240528	S0
20.9123	-0.241246	S0
20.9188	-0.242012	S0
20.9251	-0.242784	S0
20.9318	-0.243535	S0
20.9376	-0.244218	S0
20.9444	-0.2449	S0
20.951	-0.245547	S0
20.9578	-0.246223	S0
20.9646	-0.24682	S0
20.9707	-0.247445	S0
20.9772	-0.248194	S0
20.9841	-0.24888	S0
20.9905	-0.24959	S0
20.9972	-0.250296	S0
21.0037	-0.251058	S0
21.011	-0.251769	S0
21.0172	-0.252504	S0
21.0233	-0.253178	S0
21.0298	-0.25385	S0
21.0368	-0.254517	S0
21.0435	-0.255207	S0
21.0499	-0.255848	S0
21.0572	-0.256436	S0
21.0638	-0.257022	S0
21.0707	-0.257612	S0
21.0774	-0.258191	S0
21.0838	-0.25881	S0
21.0898	-0.259387	S0
21.0967	-0.259971	S0
21.1039	-0.260557	S0
21.1104	-0.261214	S0
21.1173	-0.261909	S0
21.124	-0.262568	S0
21.1307	-0.263094	S0
21.1376	-0.26376	S0
21.1447	-0.26433	S0
21.1512	-0.264803	S0
21.1577	-0.265441	S0
21.1653	-0.266015	S0
21.1722	-0.266607	S0
21.1782	-0.267235	S0
21.1854	-0.267838	S0
21.1924	-0.268347	S0
21.1991	-0.268914	S0
21.2067	-0.269425	S0
21.213	-0.269972	S0
21.2202	-0.270463	S0
21.2268	-0.270929	S0
21.2339	-0.27145	S0
21.2404	-0.271976	S0
21.2475	-0.272503	S0
21.2545	-0.273139	S0
21.2617	-0.273772	S0
21.2681	-0.274325	S0
21.2753	-0.274873	S0
21.2824	-0.275344	S0
21.2897	-0.275812	S0
21.2966	-0.276311	S0
21.3037	-0.276865	S0
21.3106	-0.277285	S0
21.3185	-0.277751	S0
21.3245	-0.278195	S0
21.3318	-0.278704	S0
21.3387	-0.279231	S0
21.3458	-0.279798	S0
21.3527	-0.28024	S0
21.3599	-0.280723	S0
21.3677	-0.281148	S0
21.374	-0.281623	S0
21.3814	-0.282114	S0
21.3888	-0.282542	S0
21.396	-0.283052	S0
21.403	-0.283554	S0
21.4099	-0.284016	S0
21.417	-0.284465	S0
21.4242	-0.284909	S0
21.4314	-0.28539	S0
21.4382	-0.285817	S0
21.4454	-0.286237	S0
21.4526	-0.286641	S0
21.46	-0.287038	S0
21.4672	-0.287479	S0
21.4744	-0.287955	S0
21.4816	-0.288383	S0
21.4883	-0.288873	S0
21.4954	-0.289282	S0
21.5029	-0.289741	S0
21.5104	-0.290234	S0
21.5176	-0.290718	S0
21.5251	-0.291086	S0
21.5326	-0.291458	S0
21.5397	-0.291805	S0
21.5467	-0.292211	S0
21.5542	-0.292525	S0
21.5615	-0.292894	S0
21.5685	-0.293322	S0
21.576	-0.293683	S0
21.5835	-0.294084	S0
21.5906	-0.294526	S0
21.5976	-0.294938	S0
21.6052	-0.29535	S0
21.6127	-0.295749	S0
21.6202	-0.296132	S0
21.6271	-0.296495	S0
21.6347	-0.296868	S0
21.6416	-0.297245	S0
21.6491	-0.297628	S0
21.6566	-0.297958	S0
21.6635	-0.298302	S0
21.671	-0.298701	S0
21.6784	-0.29908	S0
21.6856	-0.299424	S0
21.6931	-0.29981	S0
21.7007	-0.300159	S0
21.7086	-0.30045	S0
21.7157	-0.300753	S0
21.7232	-0.301039	S0
21.7305	-0.301364	S0
21.7381	-0.301653	S0
21.7447	-0.301968	S0
21.7526	-0.302353	S0
21.7596	-0.302715	S0
21.7673	-0.303095	S0
21.7751	-0.303468	S0
21.7824	-0.303805	S0
21.7901	-0.304135	S0
21.7971	-0.304462	S0
21.8047	-0.304751	S0
21.8125	-0.305039	S0
21.8191	-0.305366	S0
21.8267	-0.30567	S0
21.8347	-0.306004	S0
21.8421	-0.306319	S0
21.8499	-0.306666	S0
21.8572	-0.306921	S0
21.8643	-0.307258	S0
21.8716	-0.307537	S0
21.8794	-0.307818	S0
21.8869	-0.308124	S0
21.8945	-0.308366	S0
21.9021	-0.308693	S0
21.9102	-0.308967	S0
21.9179	-0.309271	S0
21.9251	-0.309605	S0
21.9327	-0.310002	S0
21.94	-0.310303	S0
21.9471	-0.310644	S0
21.9549	-0.310899	S0
21.9622	-0.311133	S0
21.9702	-0.311344	S0
21.9776	-0.311491	S0
21.9847	-0.311695	S0
21.9931	-0.311941	S0
22.0002	-0.312132	S0
22.008	-0.312367	S0
22.0155	-0.312774	S0
22.0229	-0.313151	S0
22.0304	-0.313536	S0
22.0383	-0.313854	S0
22.0452	-0.314153	S0
22.0533	-0.314463	S0
22.0618	-0.314627	S0
22.0691	-0.314784	S0
22.0769	-0.315053	S0
22.0837	-0.315246	S0
22.0921	-0.315436	S0
22.0997	-0.315697	S0
22.1072	-0.315946	S0
22.1147	-0.316187	S0
22.1229	-0.316413	S0
22.1299	-0.316647	S0
22.1379	-0.316923	S0
22.1452	-0.317141	S0
22.1534	-0.31732	S0
22.161	-0.317534	S0
22.1683	-0.317858	S0
22.1759	-0.318151	S0
22.183	-0.318369	S0
22.1919	-0.318543	S0
22.1994	-0.318756	S0
22.207	-0.319064	S0
22.2149	-0.319261	S0
22.2228	-0.319456	S0
22.2306	-0.319696	S0
22.2383	-0.319886	S0
22.2457	-0.320108	S0
22.2532	-0.320415	S0
22.261	-0.32066	S0
22.2681	-0.320964	S0
22.2763	-0.32113	S0
22.2845	-0.321214	S0
22.2919	-0.321485	S0
22.2994	-0.32161	S0
22.3075	-0.321707	S0
22.3149	-0.321864	S0
22.3231	-0.322052	S0
22.3307	-0.322337	S0
22.3381	-0.322573	S0
22.3457	-0.322809	S0
22.3532	-0.323123	S0
22.3615	-0.323388	S0
22.3691	-0.323632	S0
22.3767	-0.323851	S0
22.3846	-0.324078	S0
22.3924	-0.324225	S0
22.4003	-0.324389	S0
22.4085	-0.32449	S0
22.4163	-0.324688	S0
22.4243	-0.324837	S0
22.4319	-0.324918	S0
22.4397	-0.325088	S0
22.4473	-0.325182	S0
22.4554	-0.325406	S0
22.4631	-0.325577	S0
22.4705	-0.325759	S0
22.4784	-0.325981	S0
22.4858	-0.326256	S0
22.494	-0.326476	S0
22.5016	-0.326737	S0
22.5097	-0.326977	S0
22.5176	-0.327076	S0
22.5253	-0.327189	S0
22.5333	-0.32737	S0
22.5409	-0.327554	S0
22.549	-0.327675	S0
22.5566	-0.327741	S0
22.5646	-0.327878	S0
22.5728	-0.328029	S0
22.5807	-0.32828	S0
22.588	-0.32858	S0
22.5958	-0.328796	S0
22.6041	-0.328951	S0
22.6116	-0.329028	S0
22.6195	-0.329208	S0
22.6276	-0.329467	S0
22.6354	-0.329608	S0
22.6437	-0.329713	S0
22.651	-0.329917	S0
22.6593	-0.330022	S0
22.6668	-0.330187	S0
22.6741	-0.330303	S0
22.6826	-0.330472	S0
22.6903	-0.330552	S0
22.6984	-0.33064	S0
22.7064	-0.330782	S0
22.7143	-0.330893	S0
22.7223	-0.331054	S0
22.7302	-0.331189	S0
22.7377	-0.331359	S0
22.7458	-0.331553	S0
22.7534	-0.331758	S0
22.7616	-0.331913	S0
22.7693	-0.332162	S0
22.7771	-0.332249	S0
22.7859	-0.332373	S0
22.7935	-0.332543	S0
22.8016	-0.332671	S0
22.8091	-0.332789	S0
22.8166	-0.332905	S0
22.8245	-0.333013	S0
22.8326	-0.33315	S0
22.8402	-0.333252	S0
22.8486	-0.333409	S0
22.8571	-0.333588	S0
22.8649	-0.333738	S0
22.8718	-0.333861	S0
22.8805	-0.333999	S0
22.8879	-0.334104	S0
22.8969	-0.334247	S0
22.9047	-0.33437	S0
22.9122	-0.33453	S0
22.9208	-0.334669	S0
22.9282	-0.334761	S0
22.9358	-0.334823	S0
22.9445	-0.334925	S0
22.9523	-0.335081	S0
22.9603	-0.335221	S0
22.9678	-0.335311	S0
22.9755	-0.335437	S0
22.9837	-0.33558	S0
22.992	-0.335727	S0
23.0001	-0.335914	S0
23.0081	-0.336098	S0
23.016	-0.33624	S0
23.0236	-0.336293	S0
23.0322	-0.336373	S0
23.0397	-0.336477	S0
23.0477	-0.336564	S0
23.0557	-0.336649	S0
23.0638	-0.336743	S0
23.0716	-0.336859	S0
23.0797	-0.336986	S0
23.0876	-0.337107	S0
23.0956	-0.337263	S0
23.1039	-0.337416	S0
23.1119	-0.337539	S0
23.1199	-0.337668	S0
23.1272	-0.337769	S0
23.1355	-0.337862	S0
23.1434	-0.337943	S0
23.1517	-0.337995	S0
23.1595	-0.338052	S0
23.1671	-0.338146	S0
23.1755	-0.33824	S0
23.1838	-0.338346	S0
23.1922	-0.33846	S0
23.2002	-0.338568	S0
23.2081	-0.338699	S0
23.2158	-0.338827	S0
23.2238	-0.338964	S0
23.2325	-0.339093	S0
23.2398	-0.339182	S0
23.2485	-0.339271	S0
23.2564	-0.339368	S0
23.2643	-0.339474	S0
23.2721	-0.339569	S0
23.2802	-0.339675	S0
23.2877	-0.339791	S0
23.2962	-0.339901	S0
23.3041	-0.33998	S0
23.3125	-0.340097	S0
23.3205	-0.340216	S0
23.3284	-0.340346	S0
23.3363	-0.340448	S0
23.3448	-0.340546	S0
23.3528	-0.340634	S0
23.3608	-0.340728	S0
23.3687	-0.340801	S0
23.3766	-0.34089	S0
23.3847	-0.340984	S0
23.3927	-0.341064	S0
23.4006	-0.341142	S0
23.4089	-0.341222	S0
23.4173	-0.3413	S0
23.4253	-0.341372	S0
23.4333	-0.341433	S0
23.4415	-0.3415	S0
23.4492	-0.341582	S0
23.4577	-0.34165	S0
23.4656	-0.341743	S0
23.4735	-0.341843	S0
23.4819	-0.341962	S0
23.4899	-0.342115	S0
23.4979	-0.342224	S0
23.5059	-0.342324	S0
23.514	-0.342434	S0
23.5222	-0.342512	S0
23.5307	-0.342572	S0
23.5382	-0.342611	S0
23.5472	-0.342651	S0
23.5552	-0.342693	S0
23.5631	-0.342735	S0
23.5707	-0.342804	S0
23.5791	-0.342901	S0
23.5869	-0.342991	S0
23.5954	-0.343094	S0
23.6034	-0.343203	S0
23.6111	-0.343303	S0
23.6197	-0.343405	S0
23.6278	-0.343479	S0
23.6357	-0.343545	S0
23.6437	-0.343616	S0
23.6522	-0.343683	S0
23.6599	-0.343762	S0
23.6682	-0.343843	S0
23.6766	-0.343915	S0
23.6842	-0.344	S0
23.6928	-0.344055	S0
23.7008	-0.344099	S0
23.7095	-0.344167	S0
23.7172	-0.344252	S0
23.7257	-0.344339	S0
23.7328	-0.344448	S0
23.7414	-0.344552	S0
23.7499	-0.344642	S0
23.757	-0.344728	S0
23.7654	-0.344813	S0
23.7741	-0.344895	S0
23.782	-0.344959	S0
23.7899	-0.345003	S0
23.7984	-0.345059	S0
23.806	-0.345095	S0
23.8146	-0.34514	S0
23.8232	-0.345185	S0
23.831	-0.345239	S0
23.8393	-0.345303	S0
23.847	-0.345369	S0
23.8556	-0.345424	S0
23.8632	-0.34547	S0
23.8718	-0.345508	S0
23.8801	-0.345537	S0
23.8877	-0.345563	S0
23.8963	-0.345587	S0
23.9038	-0.345614	S0
23.9123	-0.345641	S0
23.9202	-0.345696	S0
23.9289	-0.345776	S0
23.9368	-0.345879	S0
23.9453	-0.345994	S0
23.953	-0.346099	S0
23.9612	-0.346184	S0
23.9691	-0.346234	S0
23.9771	-0.346271	S0
23.9854	-0.346306	S0
23.994	-0.346338	S0
24.0022	-0.346373	S0
24.0099	-0.346402	S0
24.0186	-0.346429	S0
24.0268	-0.346461	S0
24.0346	-0.346498	S0
24.0431	-0.346556	S0
24.051	-0.346613	S0
24.059	-0.346667	S0
24.0667	-0.346716	S0
24.0756	-0.346763	S0
24.0833	-0.346827	S0
24.0917	-0.346887	S0
24.0998	-0.346946	S0
24.108	-0.346991	S0
24.1159	-0.34704	S0
24.1242	-0.347079	S0
24.1326	-0.347123	S0
24.1403	-0.347172	S0
24.1491	-0.347238	S0
24.1574	-0.347329	S0
24.1648	-0.347399	S0
24.1734	-0.34748	S0
24.1819	-0.347535	S0
24.1898	-0.347581	S0
24.1977	-0.347618	S0
24.2057	-0.347656	S0
24.2147	-0.34769	S0
24.2226	-0.347731	S0
24.2308	-0.347775	S0
24.2387	-0.347819	S0
24.2471	-0.347878	S0
24.2552	-0.347929	S0
24.2637	-0.347975	S0
24.272	-0.348014	S0
24.2799	-0.348056	S0
24.2884	-0.348095	S0
24.2966	-0.348136	S0
24.3046	-0.348182	S0
24.3127	-0.348231	S0
24.3208	-0.348268	S0
24.329	-0.348297	S0
24.3373	-0.348325	S0
24.3453	-0.34836	S0
24.3534	-0.3484	S0
24.3621	-0.34844	S0
24.3702	-0.348477	S0
24.3784	-0.348507	S0
24.3869	-0.348543	S0
24.3949	-0.348594	S0
24.4032	-0.348637	S0
24.4107	-0.348678	S0
24.4194	-0.348725	S0
24.427	-0.34876	S0
24.4357	-0.348799	S0
24.4439	-0.348835	S0
24.4516	-0.348886	S0
24.4604	-0.348931	S0
24.4679	-0.348967	S0
24.4769	-0.348988	S0
24.4847	-0.349013	S0
24.4932	-0.349038	S0
24.5013	-0.349067	S0
24.5096	-0.349101	S0
24.5176	-0.34913	S0
24.5262	-0.349167	S0
24.5334	-0.349211	S0
24.5424	-0.349261	S0
24.5504	-0.349302	S0
24.5586	-0.349332	S0
24.5663	-0.349362	S0
24.5755	-0.349388	S0
24.5832	-0.349419	S0
24.5911	-0.349452	S0
24.5997	-0.349488	S0
24.6074	-0.34953	S0
24.6164	-0.349571	S0
24.6244	-0.349607	S0
24.6327	-0.349645	S0
24.6411	-0.349673	S0
24.6491	-0.349697	S0
24.6572	-0.349726	S0
24.6659	-0.349754	S0
24.6735	-0.349777	S0
24.682	-0.349805	S0
24.6901	-0.349845	S0
24.6986	-0.349887	S0
24.7067	-0.349933	S0
24.7142	-0.349984	S0
24.7221	-0.350027	S0
24.7307	-0.350068	S0
24.7391	-0.350107	S0
24.7479	-0.350137	S0
24.7552	-0.350161	S0
24.764	-0.350181	S0
24.7722	-0.350213	S0
24.7804	-0.350254	S0
24.7885	-0.350294	S0
24.797	-0.350341	S0
24.8053	-0.350385	S0
24.8135	-0.350425	S0
24.8219	-0.350456	S0
24.8298	-0.350483	S0
24.838	-0.350504	S0
24.8465	-0.350519	S0
24.8546	-0.350538	S0
24.8632	-0.350561	S0
24.8715	-0.350586	S0
24.8793	-0.350616	S0
24.8881	-0.350659	S0
24.8961	-0.350701	S0
24.9042	-0.350735	S0
24.9129	-0.350763	S0
24.9206	-0.350787	S0
24.9285	-0.350813	S0
24.9371	-0.350833	S0
24.9453	-0.350854	S0
24.9532	-0.350886	S0
24.9615	-0.35092	S0
24.9699	-0.350957	S0
24.9777	-0.350986	S0
24.9865	-0.351007	S0
24.9947	-0.351029	S0
25.0031	-0.351044	S0
25.0113	-0.351059	S0
25.0189	-0.35107	S0
25.0273	-0.351086	S0
25.0355	-0.351102	S0
25.0441	-0.351122	S0
25.0524	-0.351145	S0
25.0604	-0.351172	S0
25.0694	-0.3512	S0
25.0776	-0.35123	S0
25.0857	-0.351259	S0
25.0938	-0.351292	S0
25.1019	-0.351332	S0
25.1102	-0.351375	S0
25.1184	-0.351409	S0
25.127	-0.351446	S0
25.1348	-0.351472	S0
25.1433	-0.351497	S0
25.1511	-0.351518	S0
25.1597	-0.351539	S0
25.1677	-0.351562	S0
25.1761	-0.351587	S0
25.1842	-0.351625	S0
25.1927	-0.351666	S0
25.2008	-0.351707	S0
25.2097	-0.351736	S0
25.2173	-0.351771	S0
25.2263	-0.351797	S0
25.2337	-0.351815	S0
25.2421	-0.351829	S0
25.2501	-0.35184	S0
25.2586	-0.351858	S0
25.2667	-0.351875	S0
25.2752	-0.351891	S0
25.2839	-0.35191	S0
25.2918	-0.351931	S0
25.3002	-0.351956	S0
25.3086	-0.351973	S0
25.3166	-0.35199	S0
25.3252	-0.352008	S0
25.3334	-0.352023	S0
25.3419	-0.352038	S0
25.3495	-0.352055	S0
25.3586	-0.35207	S0
25.3664	-0.352082	S0
25.3748	-0.352097	S0
25.3823	-0.352114	S0
25.391	-0.352136	S0
25.3991	-0.352156	S0
25.4074	-0.352174	S0
25.4156	-0.352194	S0
25.4238	-0.35221	S0
25.4322	-0.352225	S0
25.4403	-0.35224	S0
25.4487	-0.35225	S0
25.4576	-0.352263	S0
25.4652	-0.352274	S0
25.4735	-0.352285	S0
25.4813	-0.352296	S0
25.4905	-0.352316	S0
25.4985	-0.352334	S0
25.507	-0.352358	S0
25.5149	-0.352386	S0
25.5232	-0.352409	S0
25.532	-0.35244	S0
25.54	-0.352466	S0
25.5482	-0.35249	S0
25.5563	-0.352507	S0
25.5644	-0.352519	S0
25.5729	-0.352541	S0
25.5811	-0.352565	S0
25.5895	-0.352583	S0
25.5979	-0.352601	S0
25.6058	-0.352623	S0
25.6146	-0.35264	S0
25.6225	-0.352652	S0
25.6313	-0.352668	S0
25.6395	-0.35268	S0
25.6469	-0.352692	S0
25.6556	-0.352704	S0
25.6637	-0.352716	S0
25.672	-0.352725	S0
25.6808	-0.352735	S0
25.6886	-0.352747	S0
25.6976	-0.352762	S0
25.7051	-0.352778	S0
25.7143	-0.352788	S0
25.7226	-0.352799	S0
25.7302	-0.352818	S0
25.7387	-0.352852	S0
25.7472	-0.352885	S0
25.7554	-0.352916	S0
25.7637	-0.35294	S0
25.7718	-0.352963	S0
25.7803	-0.352986	S0
25.7887	-0.353012	S0
25.7969	-0.353038	S0
25.8051	-0.353059	S0
25.8133	-0.353073	S0
25.8214	-0.353092	S0
25.8298	-0.35311	S0
25.8383	-0.353123	S0
25.8459	-0.353134	S0
25.8537	-0.353141	S0
25.863	-0.353156	S0
25.8709	-0.353174	S0
25.8797	-0.353193	S0
25.888	-0.353219	S0
25.896	-0.353242	S0
25.9043	-0.353261	S0
25.9124	-0.353278	S0
25.921	-0.353293	S0
25.9291	-0.353307	S0
25.9377	-0.353323	S0
25.9461	-0.353339	S0
25.9536	-0.353356	S0
25.9623	-0.353373	S0
25.9701	-0.353384	S0
25.9784	-0.353397	S0
25.9878	-0.353408	S0
25.9954	-0.353421	S0
26.0045	-0.353429	S0
26.0125	-0.353436	S0
26.0211	-0.353445	S0
26.0292	-0.353454	S0
26.0376	-0.353461	S0
26.0458	-0.353473	S0
26.0538	-0.35349	S0
26.0619	-0.353507	S0
26.0699	-0.353532	S0
26.0788	-0.353557	S0
26.0874	-0.353578	S0
26.0951	-0.353601	S0
26.103	-0.353616	S0
26.1119	-0.353631	S0
26.1199	-0.35365	S0
26.128	-0.353668	S0
26.1365	-0.353679	S0
26.1446	-0.353689	S0
26.1528	-0.353696	S0
26.1611	-0.353704	S0
26.1697	-0.353712	S0
26.1784	-0.353722	S0
26.1865	-0.353733	S0
26.1953	-0.353743	S0
26.2036	-0.353756	S0
26.212	-0.353775	S0
26.2199	-0.353799	S0
26.2281	-0.353822	S0
26.2364	-0.353835	S0
26.2448	-0.353842	S0
26.2535	-0.35385	S0
26.2615	-0.353858	S0
26.27	-0.353867	S0
26.2776	-0.353878	S0
26.2855	-0.353887	S0
26.2944	-0.353896	S0
26.3029	-0.353907	S0
26.3111	-0.353917	S0
26.3199	-0.353932	S0
26.3277	-0.353948	S0
26.3362	-0.35396	S0
26.3436	-0.353971	S0
26.353	-0.35398	S0
26.3607	-0.353992	S0
26.3696	-0.354001	S0
26.3775	-0.354008	S0
26.3854	-0.354015	S0
26.3939	-0.354021	S0
26.4025	-0.354029	S0
26.4106	-0.354036	S0
26.4191	-0.354044	S0
26.4271	-0.354052	S0
26.4355	-0.354064	S0
26.4443	-0.354075	S0
26.4527	-0.354087	S0
26.4611	-0.354097	S0
26.4689	-0.35411	S0
26.4779	-0.354127	S0
26.486	-0.354143	S0
26.4943	-0.35416	S0
26.5032	-0.354176	S0
26.5104	-0.354191	S0
26.5187	-0.3542	S0
26.5264	-0.354208	S0
26.5354	-0.354221	S0
26.5439	-0.354237	S0
26.5519	-0.354252	S0
26.5602	-0.354263	S0
26.5689	-0.354273	S0
26.5776	-0.354283	S0
26.586	-0.354294	S0
26.5939	-0.354302	S0
26.6019	-0.354314	S0
26.6106	-0.354325	S0
26.619	-0.354335	S0
26.6274	-0.354345	S0
26.6357	-0.354353	S0
26.6437	-0.354361	S0
26.6517	-0.354368	S0
26.6601	-0.354376	S0
26.6685	-0.354383	S0
26.6767	-0.35439	S0
26.6847	-0.354396	S0
26.6932	-0.354403	S0
26.7015	-0.354409	S0
26.71	-0.354416	S0
26.7181	-0.354422	S0
26.7272	-0.354428	S0
26.7349	-0.354435	S0
26.7433	-0.354442	S0
26.7512	-0.35445	S0
26.7599	-0.354458	S0
26.7682	-0.35447	S0
26.7764	-0.354481	S0
26.785	-0.354489	S0
26.7929	-0.3545	S0
26.801	-0.354507	S0
26.8092	-0.354514	S0
26.8179	-0.354521	S0
26.8263	-0.354528	S0
26.8346	-0.354534	S0
26.8432	-0.354541	S0
26.8512	-0.354548	S0
26.86	-0.354556	S0
26.8671	-0.354564	S0
26.876	-0.354574	S0
26.8849	-0.354585	S0
26.8928	-0.354593	S0
26.9012	-0.3546	S0
26.9098	-0.354607	S0
26.9178	-0.354614	S0
26.926	-0.354621	S0
26.9342	-0.354629	S0
26.9426	-0.354638	S0
26.9506	-0.354651	S0
26.959	-0.354657	S0
26.9678	-0.354665	S0
26.976	-0.354672	S0
26.9838	-0.354679	S0
26.9923	-0.354687	S0
27.0008	-0.354695	S0
27.0097	-0.354703	S0
27.0175	-0.35471	S0
27.0264	-0.354717	S0
27.034	-0.354724	S0
27.0425	-0.354731	S0
27.0509	-0.354738	S0
27.0597	-0.354744	S0
27.0676	-0.354751	S0
27.0755	-0.354758	S0
27.0842	-0.354765	S0
27.0923	-0.354773	S0
27.1011	-0.354782	S0
27.1096	-0.354792	S0
27.1175	-0.354803	S0
27.1257	-0.354809	S0
27.1338	-0.354817	S0
27.142	-0.354823	S0
27.1506	-0.354829	S0
27.159	-0.354835	S0
27.1675	-0.354842	S0
27.1757	-0.354848	S0
27.1837	-0.354855	S0
27.1926	-0.354862	S0
27.2007	-0.35487	S0
27.2083	-0.354882	S0
27.2172	-0.354897	S0
27.2256	-0.35491	S0
27.2344	-0.354923	S0
27.2425	-0.354935	S0
27.2507	-0.354944	S0
27.2591	-0.354951	S0
27.2672	-0.354957	S0
27.2751	-0.354963	S0
27.2837	-0.354969	S0
27.2918	-0.354975	S0
27.3006	-0.354981	S0
27.3084	-0.354988	S0
27.3173	-0.354995	S0
27.3249	-0.355002	S0
27.3336	-0.355009	S0
27.3418	-0.355017	S0
27.3503	-0.355028	S0
27.3585	-0.355037	S0
27.3665	-0.355045	S0
27.3752	-0.355053	S0
27.3837	-0.355066	S0
27.3922	-0.355075	S0
27.4005	-0.355082	S0
27.4084	-0.355089	S0
27.4167	-0.355099	S0
27.4251	-0.355106	S0
27.4333	-0.355113	S0
27.4419	-0.35512	S0
27.4503	-0.355127	S0
27.4585	-0.355134	S0
27.4669	-0.35514	S0
27.4754	-0.355145	S0
27.4836	-0.355149	S0
27.4918	-0.355154	S0
27.5002	-0.355157	S0
27.5086	-0.355162	S0
27.5167	-0.355167	S0
27.5252	-0.355172	S0
27.5335	-0.355178	S0
27.5418	-0.355185	S0
27.5496	-0.355196	S0
27.5578	-0.355208	S0
27.5665	-0.355215	S0
27.575	-0.355222	S0
27.5832	-0.355229	S0
27.5921	-0.355236	S0
27.6001	-0.355243	S0
27.6084	-0.355249	S0
27.6165	-0.355256	S0
27.625	-0.355262	S0
27.6335	-0.355269	S0
27.642	-0.355274	S0
27.6497	-0.35528	S0
27.6581	-0.355285	S0
27.6662	-0.355289	S0
27.6746	-0.355294	S0
27.6827	-0.355299	S0
27.6911	-0.355304	S0
27.7	-0.35531	S0
27.7077	-0.355316	S0
27.7161	-0.355323	S0
27.7246	-0.355329	S0
27.7335	-0.355335	S0
27.7419	-0.35534	S0
27.7494	-0.355346	S0
27.7582	-0.355352	S0
27.7666	-0.355358	S0
27.7748	-0.355367	S0
27.7827	-0.355377	S0
27.7913	-0.355387	S0
27.7995	-0.355398	S0
27.8081	-0.355406	S0
27.8164	-0.355413	S0
27.8242	-0.355418	S0
27.8326	-0.355423	S0
27.8412	-0.355427	S0
27.8497	-0.355431	S0
27.8576	-0.355435	S0
27.8659	-0.355438	S0
27.8745	-0.355442	S0
27.8829	-0.355447	S0
27.891	-0.355452	S0
27.8995	-0.355458	S0
27.9079	-0.355466	S0
27.9162	-0.355471	S0
27.9248	-0.355477	S0
27.9323	-0.355483	S0
27.9409	-0.355488	S0
27.9494	-0.355494	S0
27.9576	-0.355499	S0
27.9661	-0.355504	S0
27.9742	-0.355509	S0
27.9829	-0.355515	S0
27.9912	-0.355521	S0
27.9998	-0.355527	S0
28.0076	-0.355533	S0
28.0161	-0.355538	S0
28.0244	-0.355543	S0
28.0328	-0.355547	S0
28.0411	-0.355552	S0
28.0497	-0.355556	S0
28.0574	-0.355561	S0
28.0658	-0.355566	S0
28.0742	-0.355572	S0
28.0824	-0.355578	S0
28.0907	-0.355584	S0
28.099	-0.355591	S0
28.1071	-0.3556	S0
28.1155	-0.35561	S0
28.1247	-0.355616	S0
28.1324	-0.355621	S0
28.1409	-0.355626	S0
28.1497	-0.355631	S0
28.1576	-0.355636	S0
28.1662	-0.355639	S0
28.1742	-0.355643	S0
28.1824	-0.355647	S0
28.1908	-0.355651	S0
28.1992	-0.355655	S0
28.207	-0.355661	S0
28.2162	-0.355667	S0
28.2241	-0.355674	S0
28.2325	-0.355683	S0
28.2411	-0.355694	S0
28.2495	-0.355706	S0
28.2572	-0.355712	S0
28.2658	-0.355717	S0
28.2742	-0.355722	S0
28.2831	-0.355727	S0
28.2911	-0.355731	S0
28.2993	-0.355735	S0
28.3074	-0.35574	S0
28.3155	-0.355745	S0
28.3243	-0.35575	S0
28.3323	-0.355756	S0
28.3409	-0.355762	S0
28.349	-0.355767	S0
28.3577	-0.355772	S0
28.366	-0.355778	S0
28.3739	-0.355784	S0
28.3825	-0.355791	S0
28.3912	-0.355798	S0
28.3993	-0.355803	S0
28.4074	-0.355808	S0
28.4156	-0.355813	S0
28.4243	-0.355818	S0
28.4324	-0.355823	S0
28.4409	-0.355827	S0
28.449	-0.355832	S0
28.4575	-0.355836	S0
28.4657	-0.355841	S0
28.4742	-0.355846	S0
28.4827	-0.355851	S0
28.4906	-0.355856	S0
28.4994	-0.355862	S0
28.5074	-0.355868	S0
28.5157	-0.355875	S0
28.5241	-0.355881	S0
28.5329	-0.355887	S0
28.5412	-0.355893	S0
28.5492	-0.355898	S0
28.5574	-0.355904	S0
28.5657	-0.35591	S0
28.5746	-0.355915	S0
28.5831	-0.35592	S0
28.5907	-0.355926	S0
28.5992	-0.355931	S0
28.6072	-0.355937	S0
28.616	-0.355942	S0
28.6243	-0.355947	S0
28.6325	-0.355952	S0
28.6403	-0.355957	S0
28.6488	-0.355962	S0
28.6576	-0.355968	S0
28.6656	-0.355973	S0
28.6744	-0.355978	S0
28.6826	-0.355984	S0
28.6913	-0.355989	S0
28.6988	-0.355995	S0
28.7078	-0.356001	S0
28.7154	-0.356009	S0
28.7244	-0.356015	S0
28.7328	-0.356021	S0
28.7409	-0.356027	S0
28.7496	-0.356034	S0
28.7575	-0.356041	S0
28.7666	-0.356046	S0
28.7746	-0.356051	S0
28.7825	-0.356057	S0
28.7909	-0.356062	S0
28.799	-0.356067	S0
28.8079	-0.356072	S0
28.8166	-0.356077	S0
28.8246	-0.356081	S0
28.8328	-0.356086	S0
28.8415	-0.356091	S0
28.8498	-0.356096	S0
28.8578	-0.356102	S0
28.8661	-0.356108	S0
28.8751	-0.356114	S0
28.8827	-0.35612	S0
28.8912	-0.356125	S0
28.8996	-0.35613	S0
28.9079	-0.356135	S0
28.9164	-0.356139	S0
28.9242	-0.356143	S0
28.9332	-0.356147	S0
28.9412	-0.356152	S0
28.9495	-0.356155	S0
28.9582	-0.356159	S0
28.9661	-0.356163	S0
28.9746	-0.356167	S0
28.9828	-0.356171	S0
28.991	-0.356175	S0
28.9997	-0.35618	S0
29.0086	-0.356184	S0
29.0163	-0.35619	S0
29.0239	-0.356197	S0
29.0328	-0.356206	S0
29.041	-0.356211	S0
29.0493	-0.356215	S0
29.058	-0.356219	S0
29.0659	-0.356223	S0
29.074	-0.356227	S0
29.0824	-0.356231	S0
29.0913	-0.356236	S0
29.0995	-0.356242	S0
29.1075	-0.356246	S0
29.1164	-0.356251	S0
29.1243	-0.356255	S0
29.1327	-0.356259	S0
29.141	-0.356263	S0
29.1498	-0.356267	S0
29.1586	-0.356272	S0
29.1664	-0.356276	S0
29.1741	-0.35628	S0
29.1827	-0.356284	S0
29.1911	-0.356287	S0
29.1999	-0.35629	S0
29.2081	-0.356294	S0
29.2168	-0.356297	S0
29.2246	-0.356301	S0
29.2332	-0.356305	S0
29.2415	-0.35631	S0
29.2501	-0.356314	S0
29.2578	-0.356318	S0
29.2665	-0.356321	S0
29.2748	-0.356324	S0
29.2825	-0.356326	S0
29.2913	-0.356328	S0
29.3	-0.35633	S0
29.3078	-0.356333	S0
29.317	-0.356334	S0
29.3247	-0.356337	S0
29.3328	-0.356341	S0
29.3411	-0.356344	S0
29.349	-0.356347	S0
29.3579	-0.35635	S0
29.3663	-0.356353	S0
29.3742	-0.356356	S0
29.3826	-0.356359	S0
29.3919	-0.356362	S0
29.3998	-0.356366	S0
29.4082	-0.356368	S0
29.4168	-0.356371	S0
29.4245	-0.356373	S0
29.4335	-0.356374	S0
29.4414	-0.356376	S0
29.45	-0.356377	S0
29.4584	-0.356379	S0
29.4659	-0.35638	S0
29.4744	-0.356383	S0
29.483	-0.356385	S0
29.4917	-0.356388	S0
29.4994	-0.356392	S0
29.5081	-0.356395	S0
29.5169	-0.356398	S0
29.5249	-0.356401	S0
29.533	-0.356403	S0
29.5418	-0.356404	S0
29.5498	-0.356406	S0
29.5579	-0.356408	S0
29.5664	-0.356409	S0
29.5745	-0.35641	S0
29.5832	-0.356411	S0
29.5912	-0.356413	S0
29.5995	-0.356416	S0
29.6082	-0.356418	S0
29.6161	-0.356421	S0
29.624	-0.356424	S0
29.6331	-0.356427	S0
29.641	-0.356429	S0
29.6499	-0.356431	S0
29.6583	-0.356433	S0
29.6666	-0.356435	S0
29.6747	-0.356437	S0
29.6829	-0.356438	S0
29.6914	-0.35644	S0
29.7001	-0.356442	S0
29.7081	-0.356444	S0
29.7163	-0.356447	S0
29.7243	-0.35645	S0
29.7328	-0.356453	S0
29.7414	-0.356455	S0
29.7498	-0.356458	S0
29.7582	-0.356461	S0
29.7668	-0.356464	S0
29.7742	-0.356467	S0
29.7832	-0.356469	S0
29.791	-0.356471	S0
29.7994	-0.356473	S0
29.8077	-0.356476	S0
29.8164	-0.356478	S0
29.8249	-0.35648	S0
29.8328	-0.356481	S0
29.8414	-0.356483	S0
29.8501	-0.356485	S0
29.8586	-0.356487	S0
29.867	-0.35649	S0
29.875	-0.356492	S0
29.883	-0.356494	S0
29.8913	-0.356496	S0
29.8995	-0.356498	S0
29.908	-0.3565	S0
29.9159	-0.356501	S0
29.9245	-0.356503	S0
29.9331	-0.356505	S0
29.9414	-0.356508	S0
29.9494	-0.35651	S0
29.9581	-0.356513	S0
29.9662	-0.356516	S0
29.9749	-0.356519	S0
29.9829	-0.356521	S0
29.9913	-0.356524	S0
29.9997	-0.356527	S0
30.0079	-0.356528	S0
30.0165	-0.35653	S0
30.0248	-0.356533	S0
30.0333	-0.356535	S0
30.0416	-0.356536	S0
30.0497	-0.356537	S0
30.0583	-0.356537	S0
30.0671	-0.356537	S0
30.0742	-0.356538	S0
30.0826	-0.356539	S0
30.0917	-0.356541	S0
30.0996	-0.356543	S0
30.1077	-0.356546	S0
30.1167	-0.356549	S0
30.125	-0.356551	S0
30.1327	-0.356554	S0
30.1417	-0.356557	S0
30.1495	-0.356559	S0
30.1582	-0.356562	S0
30.1669	-0.356566	S0
30.1752	-0.35657	S0
30.1835	-0.356573	S0
30.1916	-0.356577	S0
30.1996	-0.35658	S0
30.2083	-0.356582	S0
30.2166	-0.356585	S0
30.2249	-0.356586	S0
30.2335	-0.356588	S0
30.2416	-0.356589	S0
30.2498	-0.35659	S0
30.2587	-0.356592	S0
30.2667	-0.356595	S0
30.275	-0.356597	S0
30.2828	-0.3566	S0
30.2916	-0.356603	S0
30.3003	-0.356606	S0
30.3085	-0.356608	S0
30.3167	-0.356611	S0
30.3246	-0.356613	S0
30.3338	-0.356614	S0
30.3415	-0.356617	S0
30.3505	-0.356619	S0
30.3588	-0.356622	S0
30.3669	-0.356625	S0
30.3757	-0.356627	S0
30.3837	-0.35663	S0
30.3918	-0.356633	S0
30.4001	-0.356635	S0
30.4077	-0.356637	S0
30.4168	-0.356639	S0
30.4252	-0.35664	S0
30.4335	-0.356642	S0
30.4413	-0.356644	S0
30.4504	-0.356645	S0
30.4586	-0.356646	S0
30.4666	-0.356647	S0
30.4754	-0.356648	S0
30.4832	-0.356649	S0
30.4915	-0.35665	S0
30.5003	-0.356652	S0
30.5079	-0.356654	S0
30.5165	-0.356656	S0
30.5252	-0.356659	S0
30.5337	-0.356661	S0
30.5417	-0.356665	S0
30.5507	-0.356671	S0
30.5593	-0.356676	S0
30.5671	-0.356679	S0
30.5749	-0.35668	S0
30.5832	-0.356682	S0
30.5918	-0.356684	S0
30.6004	-0.356686	S0
30.6085	-0.356688	S0
30.6172	-0.356689	S0
30.6254	-0.356691	S0
30.6335	-0.356692	S0
30.6419	-0.356694	S0
30.6502	-0.356696	S0
30.6588	-0.356698	S0
30.6665	-0.3567	S0
30.6752	-0.356703	S0
30.6835	-0.356706	S0
30.6915	-0.356708	S0
30.7	-0.356711	S0
30.7087	-0.356714	S0
30.7168	-0.356717	S0
30.7253	-0.356719	S0
30.7334	-0.356721	S0
30.7415	-0.356722	S0
30.7503	-0.356724	S0
30.759	-0.356725	S0
30.7673	-0.356727	S0
30.7758	-0.356727	S0
30.7835	-0.356728	S0
30.7925	-0.35673	S0
30.7999	-0.35673	S0
30.8089	-0.356732	S0
30.8172	-0.356733	S0
30.8252	-0.356733	S0
30.8339	-0.356734	S0
30.8417	-0.356736	S0
30.8505	-0.356737	S0
30.8588	-0.356739	S0
30.8671	-0.356741	S0
30.8752	-0.356744	S0
30.8833	-0.356748	S0
30.8919	-0.356754	S0
30.9007	-0.35676	S0
30.9087	-0.356767	S0
30.9172	-0.356771	S0
30.9259	-0.356773	S0
30.9342	-0.356774	S0
30.9424	-0.356773	S0
30.9508	-0.356773	S0
30.9591	-0.356771	S0
30.9672	-0.356769	S0
30.9753	-0.356767	S0
30.9839	-0.356768	S0
30.9919	-0.35677	S0
31.0003	-0.356772	S0
31.0091	-0.356777	S0
31.0174	-0.356781	S0
31.0259	-0.356784	S0
31.0342	-0.356787	S0
31.0417	-0.35679	S0
31.0506	-0.356792	S0
31.0592	-0.356793	S0
31.0675	-0.356793	S0
31.0756	-0.356794	S0
31.084	-0.356794	S0
31.0927	-0.356793	S0
31.1007	-0.356792	S0
31.1093	-0.356792	S0
31.1174	-0.356792	S0
31.1263	-0.356793	S0
31.1339	-0.356795	S0
31.1428	-0.356797	S0
31.1508	-0.356801	S0
31.1595	-0.356804	S0
31.1678	-0.356806	S0
31.1764	-0.356809	S0
31.1845	-0.356811	S0
31.1929	-0.356812	S0
31.2008	-0.356813	S0
31.2092	-0.356813	S0
31.2178	-0.356814	S0
31.2268	-0.356814	S0
31.2343	-0.356814	S0
31.2431	-0.356815	S0
31.251	-0.356816	S0
31.2597	-0.356817	S0
31.2677	-0.356819	S0
31.2757	-0.35682	S0
31.2843	-0.356822	S0
31.2931	-0.356823	S0
31.3014	-0.356824	S0
31.3096	-0.356825	S0
31.318	-0.356826	S0
31.3266	-0.356827	S0
31.3345	-0.356828	S0
31.343	-0.356827	S0
31.3509	-0.356827	S0
31.3591	-0.356827	S0
31.3682	-0.356827	S0
31.3765	-0.356827	S0
31.3849	-0.356828	S0
31.393	-0.356828	S0
31.4012	-0.356828	S0
31.4093	-0.356829	S0
31.4179	-0.35683	S0
31.4262	-0.356831	S0
31.4344	-0.356832	S0
31.4429	-0.356832	S0
31.451	-0.356833	S0
31.4595	-0.356833	S0
31.4672	-0.356835	S0
31.4765	-0.356836	S0
31.4839	-0.356837	S0
31.493	-0.356838	S0
31.5016	-0.356839	S0
31.5104	-0.356841	S0
31.5181	-0.356842	S0
31.5265	-0.356843	S0
31.5353	-0.356843	S0
31.5431	-0.356843	S0
31.5511	-0.356843	S0
31.5593	-0.356842	S0
31.5682	-0.356841	S0
31.5764	-0.356841	S0
31.5847	-0.356842	S0
31.5933	-0.356842	S0
31.6015	-0.356844	S0
31.6095	-0.356846	S0
31.6176	-0.356848	S0
31.6267	-0.35685	S0
31.6348	-0.356852	S0
31.643	-0.356853	S0
31.6516	-0.356853	S0
31.6596	-0.356853	S0
31.6687	-0.356853	S0
31.6766	-0.356853	S0
31.6852	-0.356853	S0
31.6933	-0.356853	S0
31.7011	-0.356854	S0
31.7101	-0.356857	S0
31.718	-0.356859	S0
31.7264	-0.356863	S0
31.7345	-0.356867	S0
31.7431	-0.356869	S0
31.7517	-0.35687	S0
31.7603	-0.356871	S0
31.7683	-0.356871	S0
31.7765	-0.356869	S0
31.7851	-0.356865	S0
31.7936	-0.356865	S0
31.8016	-0.356865	S0
31.8101	-0.356865	S0
31.8183	-0.356865	S0
31.8266	-0.356866	S0
31.8351	-0.356866	S0
31.8431	-0.356867	S0
31.8511	-0.356869	S0
31.8596	-0.35687	S0
31.8683	-0.356872	S0
31.8763	-0.356874	S0
31.8852	-0.356876	S0
31.8937	-0.35688	S0
31.9012	-0.356881	S0
31.9104	-0.356882	S0
31.9181	-0.356884	S0
31.9265	-0.356884	S0
31.9355	-0.356885	S0
31.9434	-0.356886	S0
31.9522	-0.356887	S0
31.9598	-0.356889	S0
31.9681	-0.356891	S0
31.9769	-0.356893	S0
31.9847	-0.356895	S0
31.9927	-0.356897	S0
32.0016	-0.356898	S0
32.0096	-0.356899	S0
32.0188	-0.3569	S0
32.0268	-0.3569	S0
32.0346	-0.3569	S0
32.0435	-0.356901	S0
32.0521	-0.356902	S0
32.0601	-0.356903	S0
32.0691	-0.356904	S0
32.0767	-0.356905	S0
32.0852	-0.356907	S0
32.0931	-0.356908	S0
32.1021	-0.356909	S0
32.1106	-0.35691	S0
32.1188	-0.356911	S0
32.127	-0.356911	S0
32.1351	-0.356912	S0
32.1431	-0.356912	S0
32.1518	-0.356912	S0
32.1602	-0.356913	S0
32.1686	-0.356914	S0
32.1775	-0.356915	S0
32.1853	-0.356915	S0
32.1934	-0.356916	S0
32.2016	-0.356918	S0
32.2096	-0.356919	S0
32.2189	-0.356921	S0
32.2263	-0.356922	S0
32.2354	-0.356924	S0
32.2435	-0.356925	S0
32.2518	-0.356926	S0
32.2599	-0.356927	S0
32.2685	-0.356927	S0
32.277	-0.356928	S0
32.2853	-0.356929	S0
32.2937	-0.35693	S0
32.3022	-0.356932	S0
32.3101	-0.356933	S0
32.3185	-0.356935	S0
32.3269	-0.356938	S0
32.3355	-0.356939	S0
32.3439	-0.356942	S0
32.3519	-0.356943	S0
32.3603	-0.356945	S0
32.3691	-0.356947	S0
32.3766	-0.356947	S0
32.3856	-0.356948	S0
32.3938	-0.356949	S0
32.4025	-0.35695	S0
32.4108	-0.356951	S0
32.4185	-0.356953	S0
32.4269	-0.356956	S0
32.4355	-0.356957	S0
32.4439	-0.356959	S0
32.4529	-0.356961	S0
32.4598	-0.356963	S0
32.4688	-0.356965	S0
32.4767	-0.356966	S0
32.4853	-0.356967	S0
32.4941	-0.356969	S0
32.503	-0.35697	S0
32.5108	-0.356972	S0
32.5188	-0.356973	S0
32.5272	-0.356974	S0
32.5359	-0.356975	S0
32.5438	-0.356975	S0
32.5524	-0.356975	S0
32.561	-0.356976	S0
32.5685	-0.356976	S0
32.577	-0.356978	S0
32.5857	-0.35698	S0
32.5943	-0.356981	S0
32.6022	-0.356984	S0
32.6109	-0.356986	S0
32.6193	-0.356988	S0
32.6277	-0.356989	S0
32.6361	-0.35699	S0
32.644	-0.356992	S0
32.6526	-0.356994	S0
32.661	-0.356995	S0
32.6697	-0.356996	S0
32.678	-0.356998	S0
32.6868	-0.356999	S0
32.6943	-0.357001	S0
32.7031	-0.357002	S0
32.7107	-0.357002	S0
32.7192	-0.357002	S0
32.727	-0.357003	S0
32.736	-0.357005	S0
32.7437	-0.357006	S0
32.7519	-0.357006	S0
32.7602	-0.357006	S0
32.7687	-0.357007	S0
32.7773	-0.357008	S0
32.7857	-0.357009	S0
32.7944	-0.35701	S0
32.8027	-0.357012	S0
32.8113	-0.357013	S0
32.8195	-0.357014	S0
32.8277	-0.357015	S0
32.8363	-0.357017	S0
32.8443	-0.357018	S0
32.8523	-0.357019	S0
32.8609	-0.357019	S0
32.8694	-0.35702	S0
32.8779	-0.35702	S0
32.8862	-0.35702	S0
32.8948	-0.357021	S0
32.9028	-0.357022	S0
32.9113	-0.357023	S0
32.9195	-0.357024	S0
32.9274	-0.357024	S0
32.9361	-0.357025	S0
32.9447	-0.357026	S0
32.9525	-0.357027	S0
32.9613	-0.357028	S0
32.9695	-0.357029	S0
32.9781	-0.35703	S0
32.9864	-0.357031	S0
32.995	-0.357032	S0
33.0035	-0.357033	S0
33.0112	-0.357034	S0
33.0199	-0.357034	S0
33.0281	-0.357035	S0
33.0363	-0.357036	S0
33.0446	-0.357036	S0
33.0532	-0.357036	S0
33.0616	-0.357036	S0
33.0697	-0.357036	S0
33.0777	-0.357036	S0
33.0861	-0.357036	S0
33.0941	-0.357036	S0
33.1029	-0.357036	S0
33.1117	-0.357037	S0
33.12	-0.357039	S0
33.1282	-0.35704	S0
33.1368	-0.357042	S0
33.1449	-0.357043	S0
33.1532	-0.357044	S0
33.1615	-0.357045	S0
33.1702	-0.357045	S0
33.1785	-0.357045	S0
33.187	-0.357044	S0
33.1949	-0.357044	S0
33.2035	-0.357044	S0
33.2118	-0.357044	S0
33.2199	-0.357044	S0
33.2286	-0.357045	S0
33.2365	-0.357046	S0
33.2447	-0.357046	S0
33.2531	-0.357047	S0
33.2615	-0.357048	S0
33.2697	-0.357048	S0
33.2776	-0.357048	S0
33.2862	-0.357048	S0
33.2948	-0.357047	S0
33.3032	-0.357048	S0
33.3112	-0.357048	S0
33.3194	-0.357048	S0
33.3282	-0.357049	S0
33.3362	-0.35705	S0
33.3446	-0.357051	S0
33.3534	-0.357052	S0
33.3617	-0.357053	S0
33.3703	-0.357054	S0
33.3786	-0.357054	S0
33.3869	-0.357054	S0
33.3947	-0.357053	S0
33.4035	-0.357052	S0
33.4117	-0.357051	S0
33.4197	-0.357051	S0
33.428	-0.357051	S0
33.4365	-0.357051	S0
33.4447	-0.357051	S0
33.4532	-0.357052	S0
33.462	-0.357053	S0
33.4698	-0.357053	S0
33.4787	-0.357052	S0
33.487	-0.357052	S0
33.495	-0.357052	S0
33.5034	-0.357052	S0
33.5117	-0.357051	S0
33.5199	-0.35705	S0
33.5287	-0.357049	S0
33.5365	-0.357049	S0
33.5446	-0.357048	S0
33.5528	-0.357048	S0
33.5615	-0.357048	S0
33.5695	-0.357048	S0
33.5784	-0.357048	S0
33.5862	-0.357048	S0
33.5943	-0.357049	S0
33.6029	-0.35705	S0
33.6113	-0.357051	S0
33.6197	-0.357053	S0
33.628	-0.357056	S0
33.6367	-0.357058	S0
33.6448	-0.357059	S0
33.6536	-0.35706	S0
33.6618	-0.35706	S0
33.6702	-0.35706	S0
33.6784	-0.35706	S0
33.6873	-0.35706	S0
33.6953	-0.357061	S0
33.7031	-0.357061	S0
33.7119	-0.357062	S0
33.7201	-0.357063	S0
33.7288	-0.357064	S0
33.7363	-0.357065	S0
33.7451	-0.357064	S0
33.7533	-0.357065	S0
33.7621	-0.357064	S0
33.7703	-0.357064	S0
33.7786	-0.357065	S0
33.7873	-0.357067	S0
33.7955	-0.357068	S0
33.8037	-0.35707	S0
33.8117	-0.357071	S0
33.8206	-0.357072	S0
33.8278	-0.357073	S0
33.837	-0.357074	S0
33.8456	-0.357074	S0
33.8534	-0.357075	S0
33.8617	-0.357076	S0
33.8695	-0.357077	S0
33.8785	-0.357078	S0
33.8873	-0.357079	S0
33.8958	-0.357081	S0
33.9044	-0.357083	S0
33.9124	-0.357084	S0
33.9213	-0.357085	S0
33.9293	-0.357087	S0
33.9378	-0.357088	S0
33.9462	-0.357089	S0
33.9537	-0.357089	S0
33.9618	-0.35709	S0
33.9705	-0.35709	S0
33.9785	-0.35709	S0
33.9868	-0.35709	S0
33.995	-0.357091	S0
34.0034	-0.357092	S0
34.0119	-0.357094	S0
34.0201	-0.357095	S0
34.0288	-0.357096	S0
34.0372	-0.357098	S0
34.0456	-0.357098	S0
34.0538	-0.357099	S0
34.0629	-0.3571	S0
34.0715	-0.3571	S0
34.0787	-0.357101	S0
34.0871	-0.357101	S0
34.0957	-0.357102	S0
34.1042	-0.357103	S0
34.1124	-0.357103	S0
34.1207	-0.357104	S0
34.1291	-0.357105	S0
34.1372	-0.357106	S0
34.1458	-0.357107	S0
34.1543	-0.357108	S0
34.162	-0.357109	S0
34.1706	-0.35711	S0
34.1795	-0.35711	S0
34.1875	-0.357112	S0
34.196	-0.357113	S0
34.2041	-0.357115	S0
34.212	-0.357117	S0
34.2207	-0.357118	S0
34.2293	-0.35712	S0
34.237	-0.357121	S0
34.2456	-0.357122	S0
34.2537	-0.357123	S0
34.2627	-0.357124	S0
34.2704	-0.357125	S0
34.279	-0.357126	S0
34.2873	-0.357125	S0
34.2962	-0.357125	S0
34.304	-0.357126	S0
34.3127	-0.357127	S0
34.3216	-0.357127	S0
34.3294	-0.357127	S0
34.338	-0.357128	S0
34.3457	-0.357127	S0
34.3542	-0.357127	S0
34.3628	-0.357127	S0
34.3705	-0.357126	S0
34.379	-0.357125	S0
34.3877	-0.357126	S0
34.3955	-0.357126	S0
34.4037	-0.357128	S0
34.4129	-0.35713	S0
34.4211	-0.357132	S0
34.4292	-0.357134	S0
34.4378	-0.357135	S0
34.4456	-0.357136	S0
34.4541	-0.357136	S0
34.4627	-0.357135	S0
34.4713	-0.357135	S0
34.4796	-0.357133	S0
34.4878	-0.357133	S0
34.4966	-0.357133	S0
34.5046	-0.357134	S0
34.513	-0.357135	S0
34.5211	-0.357137	S0
34.5292	-0.357138	S0
34.5379	-0.357139	S0
34.5462	-0.35714	S0
34.5543	-0.35714	S0
34.5628	-0.357141	S0
34.5714	-0.357141	S0
34.5797	-0.357141	S0
34.5881	-0.357141	S0
34.5965	-0.357142	S0
34.6047	-0.357142	S0
34.6133	-0.357143	S0
34.6213	-0.357144	S0
34.6302	-0.357144	S0
34.638	-0.357145	S0
34.6467	-0.357146	S0
34.6548	-0.357147	S0
34.6629	-0.357147	S0
34.6712	-0.357148	S0
34.6795	-0.357149	S0
34.6879	-0.35715	S0
34.696	-0.357151	S0
34.7045	-0.357152	S0
34.7133	-0.357153	S0
34.721	-0.357153	S0
34.7297	-0.357153	S0
34.7385	-0.357153	S0
34.7464	-0.357153	S0
34.7554	-0.357153	S0
34.7632	-0.357154	S0
34.772	-0.357155	S0
34.7795	-0.357156	S0
34.7886	-0.357156	S0
34.797	-0.357157	S0
34.8052	-0.357157	S0
34.8135	-0.357157	S0
34.8217	-0.357157	S0
34.83	-0.357157	S0
34.8388	-0.357156	S0
34.8469	-0.357156	S0
34.8553	-0.357157	S0
34.8636	-0.357158	S0
34.8718	-0.357159	S0
34.8803	-0.35716	S0
34.8883	-0.357161	S0
34.8966	-0.357162	S0
34.905	-0.357163	S0
34.9136	-0.357164	S0
34.9216	-0.357164	S0
34.9298	-0.357164	S0
34.9386	-0.357164	S0
34.9469	-0.357165	S0
34.9551	-0.357165	S0
34.9633	-0.357165	S0
34.9718	-0.357165	S0
34.9801	-0.357166	S0
34.9881	-0.357166	S0
34.9962	-0.357166	S0
35.0054	-0.357167	S0
35.0134	-0.357168	S0
35.0218	-0.357168	S0
35.0298	-0.357169	S0
35.0381	-0.35717	S0
35.0461	-0.35717	S0
35.0547	-0.35717	S0
35.0637	-0.357169	S0
35.0717	-0.357168	S0
35.0804	-0.357168	S0
35.0883	-0.357168	S0
35.0968	-0.357168	S0
35.1057	-0.357168	S0
35.1135	-0.357169	S0
35.1223	-0.35717	S0
35.1298	-0.357171	S0
35.1386	-0.357172	S0
35.1472	-0.357172	S0
35.1563	-0.357173	S0
35.1642	-0.357173	S0
35.1728	-0.357174	S0
35.1802	-0.357175	S0
35.1888	-0.357175	S0
35.1972	-0.357175	S0
35.2054	-0.357176	S0
[truncated: 21,831 more rows]

## Sheet: AtLEA4-2_Trehalose
Temperature	Heat Flow (Normalized)	Sample
20.0197	-0.0155309	T0
20.0195	-0.0155307	T0
20.02	-0.0155303	T0
20.0198	-0.0155301	T0
20.0199	-0.0155298	T0
20.0199	-0.0155296	T0
20.0203	-0.0155295	T0
20.02	-0.0155297	T0
20.0206	-0.0155298	T0
20.0195	-0.0155297	T0
20.0201	-0.0155297	T0
20.0201	-0.0155295	T0
20.02	-0.0155293	T0
20.0204	-0.0155295	T0
20.0202	-0.0155299	T0
20.0208	-0.01553	T0
20.0202	-0.0155302	T0
20.021	-0.0155306	T0
20.021	-0.0155308	T0
20.0215	-0.0155312	T0
20.0212	-0.0155319	T0
20.0222	-0.0155326	T0
20.0221	-0.0155333	T0
20.0219	-0.0155341	T0
20.022	-0.0155351	T0
20.0225	-0.0155365	T0
20.0227	-0.0155381	T0
20.0232	-0.01554	T0
20.0238	-0.0155418	T0
20.0241	-0.015544	T0
20.0243	-0.0155466	T0
20.0243	-0.0155509	T0
20.0251	-0.0155571	T0
20.0257	-0.0155669	T0
20.026	-0.01558	T0
20.0265	-0.0155999	T0
20.0271	-0.0156355	T0
20.0278	-0.0156827	T0
20.0285	-0.0157518	T0
20.0296	-0.0158473	T0
20.0295	-0.0159884	T0
20.0309	-0.01616	T0
20.031	-0.0163576	T0
20.0318	-0.0166277	T0
20.0327	-0.0169339	T0
20.034	-0.0172208	T0
20.0344	-0.0175316	T0
20.0354	-0.0178847	T0
20.0371	-0.0182649	T0
20.0382	-0.0186732	T0
20.0391	-0.0191113	T0
20.0405	-0.0195639	T0
20.0415	-0.0200549	T0
20.0432	-0.0204867	T0
20.044	-0.0209546	T0
20.0454	-0.021417	T0
20.0466	-0.0219085	T0
20.0481	-0.0224169	T0
20.0498	-0.0229767	T0
20.0517	-0.0235654	T0
20.0531	-0.0241377	T0
20.0548	-0.0247363	T0
20.0566	-0.0253228	T0
20.0582	-0.0259122	T0
20.0598	-0.0265413	T0
20.0616	-0.027202	T0
20.0637	-0.0279217	T0
20.0652	-0.0287005	T0
20.0671	-0.0294802	T0
20.0695	-0.0302709	T0
20.0714	-0.0310806	T0
20.0734	-0.0319618	T0
20.0757	-0.0328625	T0
20.0779	-0.0337461	T0
20.0803	-0.0346986	T0
20.0824	-0.035665	T0
20.0855	-0.0366554	T0
20.088	-0.0376435	T0
20.0901	-0.0386766	T0
20.0928	-0.0397436	T0
20.095	-0.0407678	T0
20.0978	-0.0418358	T0
20.1003	-0.0429893	T0
20.103	-0.0440963	T0
20.1059	-0.0452757	T0
20.1089	-0.0464691	T0
20.1121	-0.0476621	T0
20.1149	-0.0489485	T0
20.1177	-0.0502062	T0
20.1209	-0.051468	T0
20.1235	-0.0527715	T0
20.1265	-0.0540201	T0
20.1298	-0.055367	T0
20.1324	-0.056716	T0
20.1352	-0.058146	T0
20.1386	-0.059497	T0
20.1417	-0.0608953	T0
20.1452	-0.062273	T0
20.1486	-0.0637586	T0
20.1521	-0.0651513	T0
20.1554	-0.0665647	T0
20.1589	-0.0679642	T0
20.1625	-0.0693874	T0
20.1668	-0.0708032	T0
20.1704	-0.0722805	T0
20.1737	-0.0738335	T0
20.1769	-0.0753688	T0
20.1807	-0.0769145	T0
20.1842	-0.0784922	T0
20.188	-0.0800317	T0
20.1922	-0.081526	T0
20.1959	-0.0830355	T0
20.2	-0.084544	T0
20.2045	-0.0860129	T0
20.2077	-0.0875647	T0
20.2119	-0.0890747	T0
20.2159	-0.0905446	T0
20.2197	-0.092056	T0
20.2237	-0.0935626	T0
20.228	-0.0951196	T0
20.2317	-0.0966432	T0
20.2362	-0.0981552	T0
20.2407	-0.0996967	T0
20.2451	-0.101246	T0
20.2492	-0.102723	T0
20.2533	-0.104278	T0
20.2575	-0.105869	T0
20.2614	-0.107383	T0
20.2662	-0.108929	T0
20.2704	-0.110492	T0
20.2742	-0.11202	T0
20.2786	-0.113517	T0
20.2836	-0.115033	T0
20.2881	-0.116503	T0
20.2924	-0.118032	T0
20.2974	-0.119537	T0
20.302	-0.120991	T0
20.3069	-0.122469	T0
20.3115	-0.123927	T0
20.3156	-0.12538	T0
20.3198	-0.126824	T0
20.3252	-0.128315	T0
20.3292	-0.129759	T0
20.3344	-0.131112	T0
20.3388	-0.13243	T0
20.344	-0.133807	T0
20.3488	-0.135216	T0
20.3531	-0.136652	T0
20.3579	-0.138091	T0
20.3633	-0.139471	T0
20.368	-0.140849	T0
20.373	-0.142214	T0
20.3781	-0.143635	T0
20.3831	-0.145027	T0
20.3884	-0.146361	T0
20.3926	-0.147644	T0
20.3977	-0.148963	T0
20.4027	-0.150373	T0
20.4083	-0.151707	T0
20.4138	-0.153036	T0
20.418	-0.154314	T0
20.4232	-0.155581	T0
20.4284	-0.156811	T0
20.4337	-0.158023	T0
20.4391	-0.159274	T0
20.4439	-0.160506	T0
20.4492	-0.161713	T0
20.4545	-0.16288	T0
20.4597	-0.164136	T0
20.4653	-0.165448	T0
20.4703	-0.166733	T0
20.4755	-0.167956	T0
20.4804	-0.169144	T0
20.4862	-0.170382	T0
20.4913	-0.171542	T0
20.4972	-0.172778	T0
20.5029	-0.174016	T0
20.5085	-0.175185	T0
20.5134	-0.176348	T0
20.5186	-0.177483	T0
20.5248	-0.178641	T0
20.5298	-0.179849	T0
20.5353	-0.181016	T0
20.5406	-0.182063	T0
20.5465	-0.183132	T0
20.5521	-0.184185	T0
20.558	-0.185245	T0
20.5636	-0.186309	T0
20.5691	-0.187339	T0
20.5751	-0.188462	T0
20.5806	-0.189499	T0
20.5861	-0.190557	T0
20.5915	-0.191642	T0
20.5974	-0.192736	T0
20.603	-0.193722	T0
20.6091	-0.194821	T0
20.6151	-0.195905	T0
20.6204	-0.196877	T0
20.6259	-0.197781	T0
20.632	-0.198719	T0
20.6378	-0.199746	T0
20.6438	-0.200721	T0
20.6492	-0.201703	T0
20.6544	-0.202734	T0
20.6611	-0.203742	T0
20.6671	-0.204715	T0
20.6727	-0.205773	T0
20.6791	-0.206841	T0
20.6845	-0.207795	T0
20.6902	-0.208632	T0
20.6966	-0.209566	T0
20.7025	-0.210449	T0
20.7089	-0.211342	T0
20.7144	-0.212172	T0
20.7205	-0.213179	T0
20.7269	-0.214091	T0
20.7328	-0.215003	T0
20.739	-0.215905	T0
20.7447	-0.21676	T0
20.751	-0.217692	T0
20.7571	-0.218535	T0
20.7629	-0.219502	T0
20.7692	-0.220343	T0
20.7756	-0.221198	T0
20.7819	-0.222028	T0
20.7878	-0.222885	T0
20.7938	-0.223781	T0
20.8005	-0.224587	T0
20.8069	-0.225366	T0
20.8125	-0.226095	T0
20.8189	-0.226845	T0
20.8252	-0.227611	T0
20.8316	-0.228464	T0
20.8382	-0.229294	T0
20.8439	-0.230125	T0
20.8502	-0.23097	T0
20.8567	-0.231898	T0
20.8626	-0.232813	T0
20.8694	-0.23352	T0
20.8757	-0.234228	T0
20.8818	-0.234919	T0
20.8882	-0.235607	T0
20.8942	-0.236324	T0
20.9012	-0.23704	T0
20.9081	-0.237737	T0
20.914	-0.23844	T0
20.9205	-0.239247	T0
20.9268	-0.240059	T0
20.9334	-0.240913	T0
20.9397	-0.24169	T0
20.9464	-0.242456	T0
20.9527	-0.24319	T0
20.9594	-0.243906	T0
20.9657	-0.244617	T0
20.9725	-0.245357	T0
20.9788	-0.246037	T0
20.9855	-0.246691	T0
20.9918	-0.247342	T0
20.9989	-0.247937	T0
21.0051	-0.248551	T0
21.012	-0.249246	T0
21.0183	-0.249888	T0
21.0249	-0.250566	T0
21.0316	-0.251182	T0
21.0383	-0.251799	T0
21.0451	-0.252589	T0
21.0515	-0.253309	T0
21.0584	-0.253941	T0
21.0649	-0.254564	T0
21.0718	-0.255263	T0
21.0785	-0.255916	T0
21.0848	-0.256553	T0
21.092	-0.257182	T0
21.099	-0.257744	T0
21.1057	-0.258257	T0
21.1125	-0.258822	T0
21.1192	-0.259505	T0
21.1261	-0.26015	T0
21.1328	-0.260735	T0
21.1396	-0.261333	T0
21.1456	-0.261912	T0
21.1525	-0.262565	T0
21.1597	-0.263147	T0
21.1667	-0.263734	T0
21.1735	-0.264278	T0
21.18	-0.264844	T0
21.1874	-0.265477	T0
21.1944	-0.266019	T0
21.2006	-0.266604	T0
21.2083	-0.267101	T0
21.2149	-0.267719	T0
21.2212	-0.268329	T0
21.2286	-0.268921	T0
21.2351	-0.269438	T0
21.2419	-0.269926	T0
21.2493	-0.270432	T0
21.2559	-0.270908	T0
21.2631	-0.271454	T0
21.2706	-0.271986	T0
21.2776	-0.272518	T0
21.285	-0.272987	T0
21.2917	-0.273562	T0
21.2981	-0.274189	T0
21.3052	-0.274709	T0
21.3121	-0.275221	T0
21.319	-0.275729	T0
21.326	-0.276227	T0
21.3329	-0.276741	T0
21.3401	-0.277236	T0
21.347	-0.277713	T0
21.3544	-0.278149	T0
21.3619	-0.278682	T0
21.3688	-0.279204	T0
21.3758	-0.27973	T0
21.3824	-0.280183	T0
21.3894	-0.280579	T0
21.3968	-0.280943	T0
21.404	-0.281333	T0
21.4105	-0.281744	T0
21.4176	-0.282238	T0
21.4245	-0.282664	T0
21.4319	-0.283108	T0
21.4392	-0.283664	T0
21.4469	-0.284137	T0
21.4535	-0.284668	T0
21.4609	-0.285163	T0
21.468	-0.285632	T0
21.4761	-0.286085	T0
21.4829	-0.286513	T0
21.4902	-0.286925	T0
21.497	-0.287351	T0
21.5036	-0.287774	T0
21.5111	-0.288202	T0
21.5185	-0.288622	T0
21.5252	-0.289068	T0
21.533	-0.289488	T0
21.54	-0.28995	T0
21.547	-0.290287	T0
21.555	-0.290723	T0
21.562	-0.291075	T0
21.5696	-0.291555	T0
21.5767	-0.291924	T0
21.5837	-0.29235	T0
21.5913	-0.29278	T0
21.5986	-0.293182	T0
21.606	-0.293557	T0
21.6137	-0.293939	T0
21.6206	-0.294314	T0
21.628	-0.294661	T0
21.6354	-0.295021	T0
21.6426	-0.295374	T0
21.6497	-0.295781	T0
21.6576	-0.296145	T0
21.6641	-0.296508	T0
21.6718	-0.296872	T0
21.6791	-0.297182	T0
21.6865	-0.297496	T0
21.6947	-0.297887	T0
21.7022	-0.2983	T0
21.709	-0.298678	T0
21.7166	-0.299019	T0
21.724	-0.299419	T0
21.7315	-0.299849	T0
21.7386	-0.300208	T0
21.7462	-0.30061	T0
21.7533	-0.300934	T0
21.7614	-0.301252	T0
21.7681	-0.301547	T0
21.7758	-0.301831	T0
21.7829	-0.30217	T0
21.7905	-0.302539	T0
21.7982	-0.302838	T0
21.8054	-0.303178	T0
21.8127	-0.303453	T0
21.8205	-0.303728	T0
21.8275	-0.304038	T0
21.8348	-0.304424	T0
21.8428	-0.304813	T0
21.8499	-0.305165	T0
21.8573	-0.305444	T0
21.8652	-0.305836	T0
21.8721	-0.306198	T0
21.8798	-0.306514	T0
21.8879	-0.306853	T0
21.895	-0.307113	T0
21.9026	-0.307333	T0
21.9102	-0.307545	T0
21.9179	-0.30782	T0
21.9253	-0.308116	T0
21.933	-0.308499	T0
21.9402	-0.308798	T0
21.9478	-0.309136	T0
21.9553	-0.309431	T0
21.9632	-0.309724	T0
21.9706	-0.310023	T0
21.9784	-0.310279	T0
21.9859	-0.31052	T0
21.9936	-0.310719	T0
22.0011	-0.310967	T0
22.0094	-0.31114	T0
22.0164	-0.311425	T0
22.0241	-0.311687	T0
22.0317	-0.312018	T0
22.0392	-0.312301	T0
22.0463	-0.312598	T0
22.0541	-0.312885	T0
22.062	-0.313176	T0
22.0694	-0.313471	T0
22.0771	-0.313817	T0
22.0841	-0.314054	T0
22.0919	-0.314279	T0
22.0995	-0.314508	T0
22.1076	-0.314807	T0
22.1153	-0.315097	T0
22.123	-0.315331	T0
22.1308	-0.315543	T0
22.1379	-0.315719	T0
22.1456	-0.315889	T0
22.1531	-0.316274	T0
22.1612	-0.316469	T0
22.1693	-0.316615	T0
22.1771	-0.316799	T0
22.1843	-0.317011	T0
22.1917	-0.317204	T0
22.1998	-0.317491	T0
22.2075	-0.317771	T0
22.2153	-0.318081	T0
22.2228	-0.318415	T0
22.2308	-0.318618	T0
22.2384	-0.318944	T0
22.246	-0.319136	T0
22.2538	-0.31938	T0
22.2612	-0.319598	T0
22.2691	-0.31987	T0
22.2769	-0.319994	T0
22.2844	-0.320173	T0
22.2922	-0.320374	T0
22.2997	-0.320582	T0
22.3078	-0.320783	T0
22.316	-0.320955	T0
22.3232	-0.321161	T0
22.3308	-0.321336	T0
22.3387	-0.321541	T0
22.3466	-0.321773	T0
22.3541	-0.322051	T0
22.3618	-0.322296	T0
22.37	-0.322515	T0
22.3778	-0.322706	T0
22.3854	-0.322894	T0
22.3932	-0.323116	T0
22.4012	-0.323344	T0
22.4086	-0.323567	T0
22.416	-0.32374	T0
22.4239	-0.323892	T0
22.4318	-0.32415	T0
22.44	-0.324325	T0
22.4475	-0.324475	T0
22.4554	-0.324637	T0
22.4629	-0.32483	T0
22.4715	-0.32494	T0
22.4782	-0.325106	T0
22.4869	-0.325304	T0
22.4938	-0.325418	T0
22.5019	-0.325578	T0
22.5099	-0.325835	T0
22.5183	-0.32606	T0
22.5255	-0.326284	T0
22.5336	-0.326499	T0
22.5414	-0.326644	T0
22.5489	-0.326835	T0
22.557	-0.327055	T0
22.5648	-0.327225	T0
22.5727	-0.327299	T0
22.5803	-0.327473	T0
22.5881	-0.327635	T0
22.5962	-0.327765	T0
22.6036	-0.32796	T0
22.6119	-0.328175	T0
22.6201	-0.328398	T0
22.6276	-0.328541	T0
22.6357	-0.328662	T0
22.6435	-0.328868	T0
22.6514	-0.329082	T0
22.6589	-0.329201	T0
22.6668	-0.329359	T0
22.6747	-0.329542	T0
22.6823	-0.329596	T0
22.6908	-0.329723	T0
22.6986	-0.329865	T0
22.7067	-0.329993	T0
22.7142	-0.330167	T0
22.7224	-0.330297	T0
22.7306	-0.330439	T0
22.7382	-0.330631	T0
22.7461	-0.330804	T0
22.7542	-0.330903	T0
22.7618	-0.331057	T0
22.7692	-0.331203	T0
22.7776	-0.331346	T0
22.7853	-0.331473	T0
22.7932	-0.331542	T0
22.8012	-0.331683	T0
22.809	-0.331846	T0
22.817	-0.332001	T0
22.8247	-0.332211	T0
22.8331	-0.332367	T0
22.8406	-0.33243	T0
22.8486	-0.332532	T0
22.8564	-0.332722	T0
22.8642	-0.3329	T0
22.8726	-0.333053	T0
22.8799	-0.333169	T0
22.8882	-0.333262	T0
22.8965	-0.333392	T0
22.9041	-0.33356	T0
22.9128	-0.333743	T0
22.9201	-0.333931	T0
22.9278	-0.334028	T0
22.9357	-0.334108	T0
22.9437	-0.334223	T0
22.9522	-0.33435	T0
22.9594	-0.334423	T0
22.968	-0.33447	T0
22.9757	-0.334591	T0
22.9837	-0.334718	T0
22.992	-0.334872	T0
22.9997	-0.335051	T0
23.0079	-0.335238	T0
23.0159	-0.335387	T0
23.0242	-0.335499	T0
23.0318	-0.335588	T0
23.0396	-0.335673	T0
23.0478	-0.33575	T0
23.0557	-0.33581	T0
23.0637	-0.335905	T0
23.0719	-0.336069	T0
23.0796	-0.336237	T0
23.0875	-0.336379	T0
23.0956	-0.336542	T0
23.1038	-0.33669	T0
23.1119	-0.336818	T0
23.1198	-0.336902	T0
23.1276	-0.337013	T0
23.1363	-0.337108	T0
23.1439	-0.337164	T0
23.1519	-0.337231	T0
23.1601	-0.337306	T0
23.1677	-0.337407	T0
23.1758	-0.337511	T0
23.1837	-0.337605	T0
23.1919	-0.33776	T0
23.1994	-0.337929	T0
23.2077	-0.338049	T0
23.2154	-0.338168	T0
23.2235	-0.338338	T0
23.2317	-0.338471	T0
23.2397	-0.338628	T0
23.2481	-0.338743	T0
23.2563	-0.338861	T0
23.2639	-0.338973	T0
23.2718	-0.339017	T0
23.2804	-0.339057	T0
23.2887	-0.339104	T0
23.2961	-0.339174	T0
23.3043	-0.339257	T0
23.3119	-0.339352	T0
23.3204	-0.339463	T0
23.3287	-0.339558	T0
23.3371	-0.339672	T0
23.3454	-0.339765	T0
23.3531	-0.339879	T0
23.3611	-0.339964	T0
23.3686	-0.340035	T0
23.3773	-0.340112	T0
23.3856	-0.340221	T0
23.3932	-0.340305	T0
23.4007	-0.340376	T0
23.4086	-0.34049	T0
23.4169	-0.340587	T0
23.4252	-0.340719	T0
23.4335	-0.340818	T0
23.4413	-0.34092	T0
23.4492	-0.341043	T0
23.4578	-0.341147	T0
23.4654	-0.341232	T0
23.4734	-0.341314	T0
23.4819	-0.341391	T0
23.4903	-0.341452	T0
23.4982	-0.341566	T0
23.506	-0.341671	T0
23.5142	-0.341763	T0
23.5223	-0.341841	T0
23.5299	-0.341916	T0
23.5386	-0.342005	T0
23.5466	-0.342085	T0
23.5542	-0.342156	T0
23.5619	-0.342222	T0
23.571	-0.342295	T0
23.5785	-0.342349	T0
23.5874	-0.342422	T0
23.5949	-0.342506	T0
23.6037	-0.342594	T0
23.6109	-0.342678	T0
23.6197	-0.342769	T0
23.6275	-0.342866	T0
23.6357	-0.342946	T0
23.6432	-0.342994	T0
23.6521	-0.343036	T0
23.6602	-0.343074	T0
23.6682	-0.343109	T0
23.6765	-0.343158	T0
23.6849	-0.343217	T0
23.6927	-0.343276	T0
23.7004	-0.34334	T0
23.7088	-0.343423	T0
23.7166	-0.343517	T0
23.7247	-0.343621	T0
23.7332	-0.343739	T0
23.7406	-0.34386	T0
23.7495	-0.343973	T0
23.7571	-0.344069	T0
23.7652	-0.34415	T0
23.7733	-0.344227	T0
23.7816	-0.344293	T0
23.7904	-0.344349	T0
23.7981	-0.344395	T0
23.8061	-0.344433	T0
23.8139	-0.34448	T0
23.8221	-0.344516	T0
23.8305	-0.344549	T0
23.8382	-0.344617	T0
23.8464	-0.344697	T0
23.8554	-0.344771	T0
23.8625	-0.344827	T0
23.8707	-0.344883	T0
23.8798	-0.344939	T0
23.8875	-0.345014	T0
23.8952	-0.345082	T0
23.9032	-0.345161	T0
23.9117	-0.34523	T0
23.9199	-0.345278	T0
23.9284	-0.345324	T0
23.9369	-0.34538	T0
23.9447	-0.345446	T0
23.953	-0.345505	T0
23.9613	-0.345556	T0
23.9693	-0.345599	T0
23.9773	-0.345659	T0
23.9851	-0.345729	T0
23.9934	-0.345791	T0
24.002	-0.345857	T0
24.0098	-0.345937	T0
24.0178	-0.346004	T0
24.0264	-0.346068	T0
24.0342	-0.346133	T0
24.0422	-0.346208	T0
24.0511	-0.346273	T0
24.0587	-0.346337	T0
24.0671	-0.34639	T0
24.0749	-0.346445	T0
24.0834	-0.346472	T0
24.0916	-0.346496	T0
24.0997	-0.346518	T0
24.1074	-0.346549	T0
24.116	-0.346577	T0
24.1238	-0.346598	T0
24.1323	-0.34662	T0
24.1403	-0.346658	T0
24.1483	-0.346707	T0
24.1565	-0.346759	T0
24.1643	-0.346816	T0
24.1731	-0.346879	T0
24.1811	-0.346953	T0
24.1892	-0.347029	T0
24.1968	-0.3471	T0
24.2054	-0.347152	T0
24.2137	-0.347187	T0
24.2218	-0.34722	T0
24.2307	-0.347264	T0
24.2385	-0.347299	T0
24.2465	-0.34734	T0
24.255	-0.347389	T0
24.2631	-0.347457	T0
24.2714	-0.347538	T0
24.2794	-0.347622	T0
24.2873	-0.347687	T0
24.2955	-0.347745	T0
24.3042	-0.347788	T0
24.3115	-0.347833	T0
24.3201	-0.34788	T0
24.3283	-0.347905	T0
24.3365	-0.347924	T0
24.3449	-0.347944	T0
24.3533	-0.347973	T0
24.3612	-0.347999	T0
24.3693	-0.348044	T0
24.3775	-0.348088	T0
24.386	-0.348139	T0
24.3944	-0.348195	T0
24.4023	-0.348246	T0
24.4112	-0.348291	T0
24.419	-0.348335	T0
24.4272	-0.34837	T0
24.4353	-0.348405	T0
24.4435	-0.34845	T0
24.4513	-0.348495	T0
24.4604	-0.348547	T0
24.4677	-0.348603	T0
24.4761	-0.348645	T0
24.4842	-0.348673	T0
24.4927	-0.3487	T0
24.5006	-0.348727	T0
24.5086	-0.34876	T0
24.5172	-0.348801	T0
24.5251	-0.348834	T0
24.5336	-0.348874	T0
24.5414	-0.348924	T0
24.5499	-0.348976	T0
24.5578	-0.349024	T0
24.5667	-0.349059	T0
24.5749	-0.349087	T0
24.5829	-0.349115	T0
24.5912	-0.349142	T0
24.5992	-0.349173	T0
24.6075	-0.349204	T0
24.6158	-0.349229	T0
24.6239	-0.349256	T0
24.6322	-0.349289	T0
24.6403	-0.349319	T0
24.6486	-0.349345	T0
24.6568	-0.349362	T0
24.6651	-0.34938	T0
24.6732	-0.349399	T0
24.6812	-0.349421	T0
24.6895	-0.349447	T0
24.6979	-0.349478	T0
24.7061	-0.349509	T0
24.7144	-0.349547	T0
24.7217	-0.349585	T0
24.7298	-0.349625	T0
24.7383	-0.349667	T0
24.7465	-0.349704	T0
24.7552	-0.349743	T0
24.7632	-0.349784	T0
24.772	-0.349818	T0
24.7795	-0.349851	T0
24.788	-0.349884	T0
24.7965	-0.34992	T0
24.8045	-0.349953	T0
24.8125	-0.34998	T0
24.8213	-0.350012	T0
24.8295	-0.350042	T0
24.8378	-0.350081	T0
24.8464	-0.350116	T0
24.8545	-0.350148	T0
24.8622	-0.350163	T0
24.8706	-0.350181	T0
24.8784	-0.350199	T0
24.8866	-0.350217	T0
24.8945	-0.350229	T0
24.9031	-0.350251	T0
24.911	-0.350275	T0
24.9202	-0.350299	T0
24.9277	-0.350327	T0
24.9362	-0.350353	T0
24.9446	-0.350386	T0
24.9526	-0.350422	T0
24.9608	-0.350459	T0
24.9691	-0.350499	T0
24.9777	-0.350539	T0
24.9862	-0.350576	T0
24.9941	-0.350597	T0
25.0025	-0.350623	T0
25.0105	-0.35064	T0
25.0187	-0.350655	T0
25.0271	-0.350673	T0
25.0355	-0.350685	T0
25.0432	-0.350705	T0
25.0521	-0.350731	T0
25.0603	-0.35076	T0
25.0681	-0.350797	T0
25.0763	-0.350844	T0
25.0846	-0.350878	T0
25.0932	-0.350905	T0
25.101	-0.35093	T0
25.1093	-0.350955	T0
25.1175	-0.350976	T0
25.1262	-0.350992	T0
25.1344	-0.351014	T0
25.1419	-0.351047	T0
25.1504	-0.35108	T0
25.1589	-0.35111	T0
25.1672	-0.351144	T0
25.1754	-0.351184	T0
25.1838	-0.351218	T0
25.1913	-0.351247	T0
25.1996	-0.351277	T0
25.208	-0.35131	T0
25.2166	-0.35134	T0
25.2247	-0.351367	T0
25.233	-0.35139	T0
25.2411	-0.35141	T0
25.2497	-0.351435	T0
25.2587	-0.351462	T0
25.2661	-0.351488	T0
25.2745	-0.351511	T0
25.2829	-0.351531	T0
25.2911	-0.351551	T0
25.2992	-0.351575	T0
25.3072	-0.351599	T0
25.3165	-0.351624	T0
25.3233	-0.351649	T0
25.332	-0.351674	T0
25.3402	-0.351699	T0
25.3492	-0.351718	T0
25.3569	-0.351734	T0
25.3658	-0.351752	T0
25.3739	-0.351766	T0
25.382	-0.351777	T0
25.3898	-0.351789	T0
25.3985	-0.351803	T0
25.4069	-0.351816	T0
25.415	-0.351838	T0
25.4229	-0.351869	T0
25.4315	-0.351899	T0
25.4399	-0.351926	T0
25.4479	-0.351946	T0
25.4565	-0.351967	T0
25.4646	-0.351987	T0
25.4728	-0.351999	T0
25.4809	-0.352017	T0
25.4896	-0.352037	T0
25.498	-0.352061	T0
25.5064	-0.352077	T0
25.5141	-0.352091	T0
25.5227	-0.352108	T0
25.5306	-0.352121	T0
25.5387	-0.35213	T0
25.5472	-0.352143	T0
25.5557	-0.35215	T0
25.5636	-0.352165	T0
25.5714	-0.352178	T0
25.5801	-0.3522	T0
25.5887	-0.35223	T0
25.5966	-0.352254	T0
25.605	-0.352274	T0
25.6132	-0.352294	T0
25.6215	-0.352313	T0
25.6302	-0.352326	T0
25.6382	-0.352341	T0
25.6471	-0.352362	T0
25.6551	-0.352384	T0
25.6635	-0.352415	T0
25.6716	-0.352445	T0
25.6806	-0.352473	T0
25.6878	-0.352503	T0
25.6962	-0.352522	T0
25.705	-0.352542	T0
25.7129	-0.352562	T0
25.7212	-0.352582	T0
25.7296	-0.352595	T0
25.7373	-0.352609	T0
25.746	-0.352619	T0
25.754	-0.352633	T0
25.7632	-0.352647	T0
25.7702	-0.352664	T0
25.7789	-0.352688	T0
25.7874	-0.352709	T0
25.7955	-0.352733	T0
25.8036	-0.352745	T0
25.8124	-0.352754	T0
25.8205	-0.352766	T0
25.8287	-0.352781	T0
25.8373	-0.352802	T0
25.8456	-0.352818	T0
25.8535	-0.352833	T0
25.8616	-0.352846	T0
25.8702	-0.352861	T0
25.8787	-0.352876	T0
25.8869	-0.352887	T0
25.895	-0.352902	T0
25.9031	-0.352913	T0
25.9117	-0.352922	T0
25.92	-0.352932	T0
25.9282	-0.35295	T0
25.9358	-0.352971	T0
25.9447	-0.352991	T0
25.953	-0.353012	T0
25.9617	-0.353025	T0
25.9698	-0.353041	T0
25.9786	-0.353054	T0
25.9865	-0.353066	T0
25.9946	-0.353078	T0
26.0034	-0.353088	T0
26.011	-0.353102	T0
26.0188	-0.353121	T0
26.0273	-0.35314	T0
26.0355	-0.353153	T0
26.0441	-0.353163	T0
26.0527	-0.353171	T0
26.0609	-0.35318	T0
26.0688	-0.353188	T0
26.0772	-0.353202	T0
26.0855	-0.353227	T0
26.0942	-0.353252	T0
26.1024	-0.353273	T0
26.1106	-0.35329	T0
26.1189	-0.353302	T0
26.1272	-0.353312	T0
26.1352	-0.353329	T0
26.1442	-0.353345	T0
26.1522	-0.353372	T0
26.1605	-0.353389	T0
26.1688	-0.353406	T0
26.177	-0.353418	T0
26.1857	-0.353429	T0
26.1934	-0.353438	T0
26.2021	-0.353447	T0
26.2104	-0.353459	T0
26.2184	-0.353466	T0
26.227	-0.353472	T0
26.2351	-0.353479	T0
26.2431	-0.353489	T0
26.2508	-0.353496	T0
26.2603	-0.353505	T0
26.2682	-0.353513	T0
26.2763	-0.353522	T0
26.2852	-0.353532	T0
26.2932	-0.353549	T0
26.3013	-0.353562	T0
26.3106	-0.353572	T0
26.3183	-0.353589	T0
26.3267	-0.353604	T0
26.3352	-0.35362	T0
26.3431	-0.353637	T0
26.3515	-0.35365	T0
26.3597	-0.35366	T0
26.3683	-0.353671	T0
26.3763	-0.353682	T0
26.3849	-0.353693	T0
26.3929	-0.353706	T0
26.4014	-0.353719	T0
26.4097	-0.353732	T0
26.4184	-0.353749	T0
26.4263	-0.353764	T0
26.4342	-0.353778	T0
26.4426	-0.353788	T0
26.4508	-0.353796	T0
26.4597	-0.353807	T0
26.468	-0.353817	T0
26.4759	-0.353824	T0
26.4842	-0.35383	T0
26.4925	-0.353839	T0
26.5009	-0.353852	T0
26.5091	-0.353867	T0
26.5173	-0.353886	T0
26.5257	-0.353907	T0
26.5341	-0.353927	T0
26.5427	-0.353944	T0
26.5509	-0.353963	T0
26.5594	-0.353986	T0
26.568	-0.354004	T0
26.5758	-0.354016	T0
26.5843	-0.354026	T0
26.5925	-0.354034	T0
26.6013	-0.354041	T0
26.609	-0.354048	T0
26.618	-0.354055	T0
26.6256	-0.354063	T0
26.6338	-0.35407	T0
26.6415	-0.354077	T0
26.6503	-0.354085	T0
26.6589	-0.354093	T0
26.6669	-0.354105	T0
26.6746	-0.354122	T0
26.6839	-0.354135	T0
26.6919	-0.354147	T0
26.7003	-0.354164	T0
26.7091	-0.354178	T0
26.7166	-0.35419	T0
26.7248	-0.3542	T0
26.7342	-0.354212	T0
26.7418	-0.354221	T0
26.7503	-0.35423	T0
26.7581	-0.354237	T0
26.7667	-0.354244	T0
26.7751	-0.354251	T0
26.7836	-0.354259	T0
26.7916	-0.354266	T0
26.8001	-0.354274	T0
26.8085	-0.354282	T0
26.8169	-0.354289	T0
26.8249	-0.354297	T0
26.8335	-0.354305	T0
26.8416	-0.354312	T0
26.85	-0.35432	T0
26.8584	-0.354328	T0
26.8668	-0.354335	T0
26.8753	-0.354342	T0
26.8836	-0.354348	T0
26.8918	-0.354355	T0
26.9001	-0.354363	T0
26.908	-0.354371	T0
26.9168	-0.354379	T0
26.9244	-0.354387	T0
26.9334	-0.354394	T0
26.9413	-0.354402	T0
26.9493	-0.35441	T0
26.9583	-0.354418	T0
26.9662	-0.354427	T0
26.9743	-0.354436	T0
26.9826	-0.354443	T0
26.991	-0.35445	T0
26.999	-0.354456	T0
27.0075	-0.354463	T0
27.016	-0.35447	T0
27.0246	-0.354477	T0
27.0329	-0.354485	T0
27.0415	-0.354493	T0
27.0496	-0.354501	T0
27.0586	-0.354514	T0
27.0662	-0.354526	T0
27.0744	-0.354534	T0
27.0829	-0.354541	T0
27.0914	-0.354549	T0
27.0994	-0.354556	T0
27.1075	-0.354563	T0
27.1155	-0.35457	T0
27.124	-0.354577	T0
27.1327	-0.354584	T0
27.1409	-0.354591	T0
27.1491	-0.354599	T0
27.158	-0.354606	T0
27.1662	-0.354614	T0
27.1744	-0.354621	T0
27.1825	-0.354628	T0
27.1911	-0.354636	T0
27.1991	-0.354644	T0
27.2078	-0.354655	T0
27.2161	-0.354664	T0
27.2241	-0.354673	T0
27.2321	-0.354681	T0
27.2409	-0.354687	T0
27.2492	-0.354695	T0
27.257	-0.354702	T0
27.2653	-0.354709	T0
27.2738	-0.354716	T0
27.282	-0.354721	T0
27.2905	-0.354728	T0
27.299	-0.354734	T0
27.3076	-0.354741	T0
27.3157	-0.354748	T0
27.3242	-0.354755	T0
27.3323	-0.354763	T0
27.3403	-0.35477	T0
27.3488	-0.354777	T0
27.3572	-0.354784	T0
27.3652	-0.354793	T0
27.3737	-0.354801	T0
27.3822	-0.354809	T0
27.3902	-0.354816	T0
27.3988	-0.354823	T0
27.4066	-0.354829	T0
27.4153	-0.354836	T0
27.4233	-0.354842	T0
27.4323	-0.354848	T0
27.4402	-0.354855	T0
27.4488	-0.354861	T0
27.4575	-0.354868	T0
27.4655	-0.354877	T0
27.4742	-0.354887	T0
27.4823	-0.354899	T0
27.4908	-0.354909	T0
27.4985	-0.354916	T0
27.507	-0.354923	T0
27.5152	-0.354929	T0
27.5231	-0.354935	T0
27.5317	-0.354941	T0
27.5396	-0.354947	T0
27.5481	-0.354953	T0
27.5564	-0.354959	T0
27.5648	-0.354966	T0
27.5731	-0.354974	T0
27.5821	-0.354983	T0
27.5899	-0.35499	T0
27.5986	-0.355	T0
27.6067	-0.355009	T0
27.6156	-0.355021	T0
27.6238	-0.355031	T0
27.632	-0.355038	T0
27.6402	-0.355044	T0
27.6488	-0.35505	T0
27.6565	-0.355057	T0
27.6654	-0.355063	T0
27.6738	-0.355069	T0
27.6818	-0.355075	T0
27.6903	-0.355081	T0
27.6986	-0.355088	T0
27.7073	-0.355094	T0
27.7155	-0.355101	T0
27.7235	-0.355108	T0
27.7316	-0.355114	T0
27.74	-0.355121	T0
27.7487	-0.355127	T0
27.757	-0.355133	T0
27.7649	-0.355141	T0
27.773	-0.355147	T0
27.7814	-0.355154	T0
27.7897	-0.355161	T0
27.7983	-0.355168	T0
27.8069	-0.355176	T0
27.8145	-0.355184	T0
27.8232	-0.35519	T0
27.8316	-0.355196	T0
27.8401	-0.355203	T0
27.8481	-0.355209	T0
27.8556	-0.355215	T0
27.8642	-0.355222	T0
27.8728	-0.35523	T0
27.8808	-0.355239	T0
27.8896	-0.355246	T0
27.8979	-0.355257	T0
27.9063	-0.355265	T0
27.915	-0.355271	T0
27.9236	-0.355278	T0
27.9311	-0.355285	T0
27.9399	-0.355291	T0
27.9483	-0.355298	T0
27.9564	-0.355304	T0
27.9645	-0.35531	T0
27.9732	-0.355316	T0
27.9812	-0.355322	T0
27.9896	-0.355328	T0
27.9981	-0.355334	T0
28.0062	-0.35534	T0
28.0149	-0.355346	T0
28.0234	-0.355351	T0
28.0314	-0.355357	T0
28.0397	-0.355363	T0
28.0481	-0.355369	T0
28.0565	-0.355375	T0
28.0653	-0.35538	T0
28.0729	-0.355385	T0
28.0813	-0.35539	T0
28.0899	-0.355395	T0
28.098	-0.355401	T0
28.1061	-0.355406	T0
28.1146	-0.355411	T0
28.1233	-0.355417	T0
28.1313	-0.355423	T0
28.1396	-0.355429	T0
28.1475	-0.355435	T0
28.1565	-0.35544	T0
28.1643	-0.355445	T0
28.1728	-0.35545	T0
28.1816	-0.355454	T0
28.1896	-0.355459	T0
28.1979	-0.355464	T0
28.2066	-0.35547	T0
28.2147	-0.355475	T0
28.2226	-0.355481	T0
28.2313	-0.355486	T0
28.24	-0.355491	T0
28.2481	-0.355496	T0
28.2558	-0.355502	T0
28.2647	-0.355507	T0
28.2728	-0.355513	T0
28.2816	-0.355519	T0
28.2892	-0.355525	T0
28.2982	-0.355531	T0
28.3063	-0.355537	T0
28.3149	-0.355543	T0
28.323	-0.355551	T0
28.3313	-0.355558	T0
28.3401	-0.355563	T0
28.3479	-0.355568	T0
28.3566	-0.355573	T0
28.3644	-0.355578	T0
28.3729	-0.355584	T0
28.3812	-0.355589	T0
28.3897	-0.355595	T0
28.3975	-0.3556	T0
28.4065	-0.355607	T0
28.4143	-0.355615	T0
28.4229	-0.355621	T0
28.4315	-0.355627	T0
28.4394	-0.355632	T0
28.4483	-0.355637	T0
28.456	-0.355643	T0
28.4646	-0.355649	T0
28.4738	-0.355654	T0
28.4815	-0.355661	T0
28.4906	-0.355671	T0
28.498	-0.355682	T0
28.5065	-0.355689	T0
28.5148	-0.355696	T0
28.5234	-0.355701	T0
28.5314	-0.355707	T0
28.5393	-0.355711	T0
28.5479	-0.355716	T0
28.5563	-0.355721	T0
28.5649	-0.355726	T0
28.573	-0.355731	T0
28.5811	-0.355736	T0
28.5892	-0.355742	T0
28.5979	-0.355748	T0
28.6063	-0.355753	T0
28.6144	-0.355757	T0
28.6231	-0.355762	T0
28.6315	-0.355767	T0
28.6394	-0.355772	T0
28.6478	-0.355777	T0
28.6567	-0.355783	T0
28.6643	-0.35579	T0
28.6734	-0.355796	T0
28.6812	-0.355801	T0
28.6895	-0.355806	T0
28.6979	-0.355811	T0
28.7058	-0.355817	T0
28.7147	-0.355822	T0
28.7231	-0.355828	T0
28.7313	-0.355834	T0
28.7395	-0.35584	T0
28.7481	-0.355846	T0
28.7561	-0.355852	T0
28.7652	-0.355857	T0
28.7732	-0.355862	T0
28.7819	-0.355866	T0
28.7894	-0.355871	T0
28.798	-0.355876	T0
28.8061	-0.355881	T0
28.8147	-0.355886	T0
28.8231	-0.355891	T0
28.831	-0.355895	T0
28.8393	-0.355899	T0
28.848	-0.355902	T0
28.8564	-0.355907	T0
28.8643	-0.355911	T0
28.8723	-0.355915	T0
28.8812	-0.35592	T0
28.8892	-0.355926	T0
28.8976	-0.355933	T0
28.906	-0.35594	T0
28.9152	-0.355946	T0
28.9232	-0.355952	T0
28.9314	-0.355957	T0
28.9402	-0.355963	T0
28.9482	-0.355968	T0
28.9561	-0.355973	T0
28.9648	-0.355977	T0
28.9732	-0.355982	T0
28.9812	-0.355987	T0
28.9898	-0.355992	T0
28.9976	-0.355996	T0
29.0066	-0.356	T0
29.0146	-0.356004	T0
29.0231	-0.356009	T0
29.0306	-0.356013	T0
29.0395	-0.356017	T0
29.048	-0.356022	T0
29.0564	-0.356026	T0
29.0642	-0.356031	T0
29.0727	-0.356036	T0
29.0812	-0.356041	T0
29.0898	-0.356047	T0
29.0983	-0.356052	T0
29.1063	-0.356057	T0
29.1148	-0.356062	T0
29.1231	-0.356067	T0
29.1316	-0.356071	T0
29.1399	-0.356075	T0
29.1479	-0.356079	T0
29.1564	-0.356082	T0
29.1647	-0.356085	T0
29.1728	-0.356089	T0
29.1818	-0.356093	T0
29.19	-0.356098	T0
29.1981	-0.356102	T0
29.2063	-0.356107	T0
29.2149	-0.356111	T0
29.223	-0.356116	T0
29.2313	-0.356121	T0
29.2399	-0.356126	T0
29.2488	-0.356131	T0
29.2567	-0.356136	T0
29.2649	-0.356145	T0
29.2736	-0.356152	T0
29.2814	-0.356159	T0
29.2901	-0.356164	T0
29.2985	-0.356169	T0
29.3067	-0.356173	T0
29.3149	-0.356176	T0
29.3232	-0.356179	T0
29.3318	-0.356182	T0
29.3398	-0.356185	T0
29.3478	-0.356189	T0
29.3566	-0.356192	T0
29.365	-0.356196	T0
29.3732	-0.3562	T0
29.381	-0.356203	T0
29.3895	-0.356206	T0
29.3986	-0.356209	T0
29.4069	-0.356212	T0
29.4147	-0.356215	T0
29.4234	-0.356218	T0
29.4314	-0.356222	T0
29.4402	-0.356225	T0
29.4485	-0.356229	T0
29.4564	-0.356233	T0
29.4652	-0.356237	T0
29.4736	-0.35624	T0
29.4816	-0.356245	T0
29.4899	-0.356248	T0
29.4979	-0.356252	T0
29.5066	-0.356256	T0
29.5149	-0.35626	T0
29.5231	-0.356264	T0
29.5317	-0.356267	T0
29.5401	-0.356271	T0
29.5481	-0.356274	T0
29.5564	-0.356277	T0
29.5648	-0.35628	T0
29.5734	-0.356282	T0
29.5817	-0.356286	T0
29.5898	-0.35629	T0
29.5984	-0.356293	T0
29.6071	-0.356296	T0
29.6151	-0.356299	T0
29.6236	-0.356302	T0
29.6318	-0.356305	T0
29.6399	-0.356306	T0
29.6484	-0.356308	T0
29.6573	-0.35631	T0
29.6654	-0.356312	T0
29.6735	-0.356315	T0
29.6815	-0.356318	T0
29.6898	-0.35632	T0
29.6982	-0.356323	T0
29.707	-0.356326	T0
29.7148	-0.356328	T0
29.7228	-0.35633	T0
29.7314	-0.356333	T0
29.7396	-0.356334	T0
29.7482	-0.356337	T0
29.7572	-0.35634	T0
29.7655	-0.356343	T0
29.774	-0.356346	T0
29.782	-0.356348	T0
29.7902	-0.35635	T0
29.7987	-0.356353	T0
29.807	-0.356355	T0
29.8158	-0.356358	T0
29.8235	-0.356361	T0
29.832	-0.356364	T0
29.8402	-0.356368	T0
29.848	-0.356371	T0
29.8564	-0.356375	T0
29.8649	-0.356377	T0
29.8732	-0.35638	T0
29.8819	-0.356382	T0
29.8905	-0.356383	T0
29.8985	-0.356385	T0
29.907	-0.356386	T0
29.9158	-0.356388	T0
29.9237	-0.356391	T0
29.9319	-0.356393	T0
29.9406	-0.356396	T0
29.9488	-0.356397	T0
29.9566	-0.356398	T0
29.9651	-0.3564	T0
29.9731	-0.356402	T0
29.9823	-0.356404	T0
29.9904	-0.356406	T0
29.9984	-0.356408	T0
30.0075	-0.356411	T0
30.0156	-0.356414	T0
30.0239	-0.356417	T0
30.0323	-0.35642	T0
30.0408	-0.356423	T0
30.0482	-0.356425	T0
30.0569	-0.356428	T0
30.0657	-0.356431	T0
30.0743	-0.356434	T0
30.082	-0.356436	T0
30.0902	-0.356439	T0
30.0983	-0.356441	T0
30.1069	-0.356443	T0
30.1154	-0.356446	T0
30.1234	-0.356447	T0
30.1321	-0.356449	T0
30.1404	-0.35645	T0
30.1487	-0.356452	T0
30.1574	-0.356454	T0
30.1657	-0.356456	T0
30.174	-0.356458	T0
30.1824	-0.35646	T0
30.1907	-0.356462	T0
30.1983	-0.356465	T0
30.2071	-0.356469	T0
30.2153	-0.356471	T0
30.2237	-0.356473	T0
30.232	-0.356475	T0
30.2408	-0.356476	T0
30.2489	-0.356476	T0
30.2572	-0.356476	T0
30.2658	-0.356478	T0
30.2736	-0.356479	T0
30.2817	-0.356482	T0
30.29	-0.356485	T0
30.2984	-0.35649	T0
30.3066	-0.356496	T0
30.3152	-0.356501	T0
30.3236	-0.356503	T0
30.3324	-0.356506	T0
30.3405	-0.356507	T0
30.3492	-0.356509	T0
30.3577	-0.356509	T0
30.3655	-0.356511	T0
30.3744	-0.356512	T0
30.3827	-0.356514	T0
30.391	-0.356515	T0
30.399	-0.356517	T0
30.4073	-0.356519	T0
30.4158	-0.356521	T0
30.4238	-0.356524	T0
30.4321	-0.356526	T0
30.4404	-0.356529	T0
30.4484	-0.356531	T0
30.4568	-0.356533	T0
30.4662	-0.356536	T0
30.4736	-0.356539	T0
30.4821	-0.356541	T0
30.4902	-0.356544	T0
30.4987	-0.356546	T0
30.5073	-0.356548	T0
30.5156	-0.356551	T0
30.5242	-0.356553	T0
30.532	-0.356556	T0
30.5406	-0.356559	T0
30.549	-0.356562	T0
30.5578	-0.356565	T0
30.5665	-0.356567	T0
30.574	-0.35657	T0
30.5826	-0.356573	T0
30.5907	-0.356575	T0
30.5994	-0.356576	T0
30.6076	-0.356577	T0
30.616	-0.356578	T0
30.624	-0.356579	T0
30.6326	-0.35658	T0
30.6405	-0.356583	T0
30.649	-0.356585	T0
30.6571	-0.356587	T0
30.6662	-0.356591	T0
30.6744	-0.356593	T0
30.6822	-0.356597	T0
30.6909	-0.356599	T0
30.6994	-0.356602	T0
30.7081	-0.356603	T0
30.7162	-0.356604	T0
30.7247	-0.356605	T0
30.7325	-0.356605	T0
30.7405	-0.356606	T0
30.7489	-0.356606	T0
30.7571	-0.356607	T0
30.7656	-0.356607	T0
30.7746	-0.356608	T0
30.7828	-0.35661	T0
30.7909	-0.356613	T0
30.7995	-0.356615	T0
30.8084	-0.356617	T0
30.8162	-0.356618	T0
30.8251	-0.356619	T0
30.8323	-0.35662	T0
30.8414	-0.356622	T0
30.8495	-0.356623	T0
30.8575	-0.356623	T0
30.8657	-0.356624	T0
30.874	-0.356625	T0
30.8822	-0.356627	T0
30.8914	-0.35663	T0
30.8995	-0.356632	T0
30.9074	-0.356635	T0
30.9162	-0.356637	T0
30.9249	-0.356639	T0
30.9331	-0.356641	T0
30.9412	-0.356642	T0
30.9495	-0.356644	T0
30.9575	-0.356646	T0
30.9661	-0.356647	T0
30.9747	-0.35665	T0
30.9829	-0.356652	T0
30.9914	-0.356655	T0
30.9996	-0.356657	T0
31.0077	-0.356659	T0
31.0158	-0.356662	T0
31.0243	-0.356664	T0
31.0324	-0.356666	T0
31.0412	-0.356668	T0
31.0495	-0.35667	T0
31.0579	-0.356671	T0
31.0665	-0.356673	T0
31.0747	-0.356675	T0
31.0828	-0.356676	T0
31.0917	-0.356677	T0
31.0995	-0.356679	T0
31.1078	-0.35668	T0
31.1159	-0.356681	T0
31.1246	-0.356683	T0
31.1329	-0.356684	T0
31.141	-0.356685	T0
31.1498	-0.356687	T0
31.1579	-0.356689	T0
31.1663	-0.356691	T0
31.174	-0.356692	T0
31.1829	-0.356694	T0
31.1911	-0.356696	T0
31.1997	-0.356698	T0
31.2083	-0.3567	T0
31.216	-0.356701	T0
31.2252	-0.356702	T0
31.2335	-0.356704	T0
31.2415	-0.356705	T0
31.2504	-0.356705	T0
31.2585	-0.356706	T0
31.2664	-0.356707	T0
31.2749	-0.356708	T0
31.2834	-0.356709	T0
31.2915	-0.35671	T0
31.3002	-0.356712	T0
31.3083	-0.356713	T0
31.3163	-0.356715	T0
31.3245	-0.356716	T0
31.3336	-0.356717	T0
31.342	-0.356717	T0
31.3502	-0.356718	T0
31.3583	-0.356719	T0
31.3672	-0.35672	T0
31.3751	-0.356721	T0
31.3839	-0.356722	T0
31.3919	-0.356723	T0
31.4	-0.356725	T0
31.4082	-0.356726	T0
31.4167	-0.356727	T0
31.425	-0.356728	T0
31.434	-0.356729	T0
31.442	-0.356729	T0
31.4506	-0.35673	T0
31.4586	-0.35673	T0
31.4664	-0.35673	T0
31.4748	-0.356731	T0
31.4838	-0.356732	T0
31.4915	-0.356734	T0
31.5006	-0.356735	T0
31.5088	-0.356736	T0
31.5163	-0.356738	T0
31.5256	-0.356739	T0
31.5331	-0.35674	T0
31.5418	-0.356741	T0
31.5497	-0.356741	T0
31.5584	-0.356741	T0
31.5667	-0.356741	T0
31.575	-0.35674	T0
31.5834	-0.35674	T0
31.5918	-0.35674	T0
31.6003	-0.356742	T0
31.6083	-0.356743	T0
31.6167	-0.356744	T0
31.6254	-0.356745	T0
31.6334	-0.356746	T0
31.6418	-0.356746	T0
31.6502	-0.356746	T0
31.6585	-0.356746	T0
31.6669	-0.356747	T0
31.6755	-0.356747	T0
31.6835	-0.356749	T0
31.692	-0.35675	T0
31.7003	-0.356751	T0
31.7084	-0.356752	T0
31.7164	-0.356751	T0
31.7249	-0.356752	T0
31.7335	-0.356753	T0
31.7413	-0.356753	T0
31.7503	-0.356754	T0
31.759	-0.356755	T0
31.7668	-0.356756	T0
31.7755	-0.356757	T0
31.7832	-0.356758	T0
31.7917	-0.356758	T0
31.7997	-0.356758	T0
31.8085	-0.356758	T0
31.817	-0.356757	T0
31.8256	-0.356757	T0
31.8336	-0.356758	T0
31.8417	-0.356759	T0
31.8505	-0.356759	T0
31.8583	-0.356761	T0
31.8667	-0.356762	T0
31.8754	-0.356763	T0
31.8839	-0.356763	T0
31.8922	-0.356764	T0
31.9004	-0.356763	T0
31.9082	-0.356762	T0
31.9166	-0.356762	T0
31.9249	-0.356762	T0
31.9338	-0.356763	T0
31.9425	-0.356765	T0
31.9505	-0.356766	T0
31.9585	-0.356769	T0
31.9672	-0.356771	T0
31.9755	-0.356773	T0
31.9842	-0.356775	T0
31.992	-0.356777	T0
32.0004	-0.356778	T0
32.0091	-0.356779	T0
32.0174	-0.35678	T0
32.0255	-0.35678	T0
32.0337	-0.356781	T0
32.0421	-0.356781	T0
32.0507	-0.356781	T0
32.0589	-0.356781	T0
32.067	-0.356781	T0
32.0753	-0.356782	T0
32.0834	-0.356782	T0
32.0924	-0.356783	T0
32.1006	-0.356784	T0
32.1089	-0.356786	T0
32.1179	-0.356788	T0
32.1253	-0.356792	T0
32.1342	-0.356795	T0
32.1428	-0.356797	T0
32.1509	-0.356799	T0
32.159	-0.356805	T0
32.1675	-0.356808	T0
32.1758	-0.356809	T0
32.1844	-0.356809	T0
32.1924	-0.356809	T0
32.2006	-0.35681	T0
32.2088	-0.35681	T0
32.217	-0.356809	T0
32.2254	-0.35681	T0
32.2342	-0.356811	T0
32.2422	-0.356812	T0
32.2512	-0.356814	T0
32.2592	-0.356816	T0
32.2676	-0.356818	T0
32.2755	-0.35682	T0
32.2841	-0.356822	T0
32.2925	-0.356823	T0
32.3003	-0.356825	T0
32.3095	-0.356826	T0
32.3177	-0.356828	T0
32.3261	-0.356829	T0
32.3341	-0.35683	T0
32.343	-0.356832	T0
32.3514	-0.356834	T0
32.3592	-0.356835	T0
32.3682	-0.356836	T0
32.3761	-0.356836	T0
32.3837	-0.356836	T0
32.3922	-0.356836	T0
32.4011	-0.356837	T0
32.4098	-0.356837	T0
32.4174	-0.356839	T0
32.4257	-0.35684	T0
32.4341	-0.356843	T0
32.443	-0.356845	T0
32.4509	-0.356849	T0
32.4594	-0.356853	T0
32.4674	-0.356857	T0
32.4762	-0.356861	T0
32.4846	-0.356863	T0
32.4928	-0.356866	T0
32.5011	-0.356868	T0
32.5093	-0.356869	T0
32.5178	-0.356869	T0
32.5259	-0.35687	T0
32.5344	-0.356871	T0
32.5429	-0.356871	T0
32.5513	-0.356872	T0
32.5591	-0.356872	T0
32.5682	-0.356874	T0
32.5757	-0.356874	T0
32.5843	-0.356876	T0
32.5928	-0.356876	T0
32.6011	-0.356878	T0
32.6093	-0.356878	T0
32.6175	-0.356879	T0
32.6262	-0.35688	T0
32.6345	-0.356881	T0
32.6429	-0.356882	T0
32.6516	-0.356884	T0
32.6592	-0.356884	T0
32.668	-0.356885	T0
32.6757	-0.356885	T0
32.6842	-0.356886	T0
32.6925	-0.356887	T0
32.7009	-0.356888	T0
32.7092	-0.356888	T0
32.7175	-0.356889	T0
32.726	-0.35689	T0
32.7346	-0.356893	T0
32.7428	-0.356895	T0
32.7508	-0.356897	T0
32.7598	-0.356898	T0
32.7678	-0.3569	T0
32.7764	-0.356901	T0
32.7843	-0.356903	T0
32.7927	-0.356904	T0
32.8017	-0.356905	T0
32.8094	-0.356905	T0
32.818	-0.356906	T0
32.8259	-0.356906	T0
32.8345	-0.356907	T0
32.8427	-0.356908	T0
32.8517	-0.35691	T0
32.8597	-0.356912	T0
32.868	-0.356914	T0
32.8762	-0.356916	T0
32.8844	-0.356918	T0
32.8931	-0.35692	T0
32.9016	-0.356922	T0
32.9101	-0.356923	T0
32.918	-0.356923	T0
32.9264	-0.356924	T0
32.9345	-0.356924	T0
32.9429	-0.356924	T0
32.9513	-0.356925	T0
32.9601	-0.356926	T0
32.9681	-0.356927	T0
32.9766	-0.356927	T0
32.9847	-0.356928	T0
32.9931	-0.356929	T0
33.0016	-0.356929	T0
33.0098	-0.35693	T0
33.0175	-0.35693	T0
33.0263	-0.356931	T0
33.0347	-0.356931	T0
33.0428	-0.356932	T0
33.0511	-0.356933	T0
33.0596	-0.356934	T0
33.0684	-0.356935	T0
33.0763	-0.356937	T0
33.0849	-0.356937	T0
33.0932	-0.356937	T0
33.1015	-0.356937	T0
33.1098	-0.356937	T0
33.1183	-0.356936	T0
33.1263	-0.356937	T0
33.1345	-0.356937	T0
33.1431	-0.356937	T0
33.1513	-0.356938	T0
33.1596	-0.356939	T0
33.168	-0.35694	T0
33.1763	-0.356941	T0
33.1851	-0.356942	T0
33.1929	-0.356943	T0
33.2016	-0.356943	T0
33.2101	-0.356942	T0
33.2183	-0.356942	T0
33.2267	-0.35694	T0
33.2345	-0.356939	T0
33.2436	-0.356939	T0
33.2512	-0.356939	T0
33.2601	-0.356938	T0
33.2686	-0.356938	T0
33.277	-0.356939	T0
33.2855	-0.35694	T0
33.2938	-0.35694	T0
33.3019	-0.35694	T0
33.3101	-0.356939	T0
33.3189	-0.356939	T0
33.3265	-0.356939	T0
33.3354	-0.35694	T0
33.3432	-0.356941	T0
33.3514	-0.356943	T0
33.36	-0.356944	T0
33.3685	-0.356945	T0
33.3768	-0.356947	T0
33.385	-0.356948	T0
33.3933	-0.356949	T0
33.4021	-0.356949	T0
33.4104	-0.356949	T0
33.4184	-0.356948	T0
33.4269	-0.356946	T0
33.4353	-0.356944	T0
33.4433	-0.356941	T0
33.4517	-0.35694	T0
33.4603	-0.356937	T0
33.4679	-0.356936	T0
33.4765	-0.356934	T0
33.4852	-0.356932	T0
33.493	-0.356932	T0
33.5017	-0.356932	T0
33.51	-0.356932	T0
33.5184	-0.356933	T0
33.527	-0.356936	T0
33.5353	-0.35694	T0
33.5433	-0.356946	T0
33.5524	-0.356951	T0
33.5604	-0.356954	T0
33.5686	-0.356955	T0
33.5769	-0.356954	T0
33.5853	-0.356954	T0
33.5935	-0.356954	T0
33.6019	-0.356954	T0
33.6105	-0.356954	T0
33.6185	-0.356953	T0
33.6268	-0.356952	T0
33.6348	-0.35695	T0
33.6433	-0.35695	T0
33.652	-0.35695	T0
33.6604	-0.35695	T0
33.6687	-0.35695	T0
33.6775	-0.35695	T0
33.6855	-0.35695	T0
33.6939	-0.356951	T0
33.7023	-0.35695	T0
33.7102	-0.35695	T0
33.7187	-0.356949	T0
33.7267	-0.356949	T0
33.7353	-0.35695	T0
33.744	-0.35695	T0
33.752	-0.35695	T0
33.7605	-0.35695	T0
33.7688	-0.356951	T0
33.7771	-0.356951	T0
33.7857	-0.356952	T0
33.7936	-0.356952	T0
33.8024	-0.356952	T0
33.8106	-0.356952	T0
33.8192	-0.356952	T0
33.8273	-0.356953	T0
33.8354	-0.356952	T0
33.8437	-0.356951	T0
33.852	-0.356949	T0
33.8604	-0.356948	T0
33.8687	-0.356947	T0
33.877	-0.356946	T0
33.8862	-0.356946	T0
33.8941	-0.356946	T0
33.9023	-0.356947	T0
33.9107	-0.356948	T0
33.9187	-0.35695	T0
33.9271	-0.356951	T0
33.9364	-0.356951	T0
33.9446	-0.356952	T0
33.9522	-0.356952	T0
33.9607	-0.356953	T0
33.9693	-0.356952	T0
33.9772	-0.356951	T0
33.9856	-0.356951	T0
33.9942	-0.356951	T0
34.0023	-0.356951	T0
34.0106	-0.356951	T0
34.019	-0.35695	T0
34.0271	-0.35695	T0
34.0364	-0.356951	T0
34.0444	-0.356952	T0
34.0525	-0.356952	T0
34.0611	-0.356952	T0
34.069	-0.356953	T0
34.0779	-0.356953	T0
34.0851	-0.356954	T0
34.0939	-0.356955	T0
34.1028	-0.356956	T0
34.1108	-0.356957	T0
34.1195	-0.356958	T0
34.1281	-0.356961	T0
34.1357	-0.356962	T0
34.1442	-0.356963	T0
34.1525	-0.356964	T0
34.1615	-0.356965	T0
34.1699	-0.356966	T0
34.1779	-0.356966	T0
34.1863	-0.356966	T0
34.1941	-0.356966	T0
34.203	-0.356965	T0
34.2107	-0.356965	T0
34.2191	-0.356966	T0
34.2279	-0.356966	T0
34.2364	-0.356967	T0
34.2443	-0.356969	T0
34.2528	-0.356971	T0
34.2611	-0.356972	T0
34.2695	-0.356972	T0
34.2776	-0.356971	T0
34.2861	-0.35697	T0
34.2947	-0.356969	T0
34.303	-0.356967	T0
34.3113	-0.356966	T0
34.3196	-0.356965	T0
34.3281	-0.356965	T0
34.3363	-0.356968	T0
34.3447	-0.356973	T0
34.3529	-0.356979	T0
34.3612	-0.356982	T0
34.3693	-0.356983	T0
34.378	-0.356984	T0
34.3862	-0.356984	T0
34.394	-0.356985	T0
34.4028	-0.356985	T0
34.4113	-0.356986	T0
34.4195	-0.356987	T0
34.4274	-0.356988	T0
34.4362	-0.35699	T0
34.4447	-0.356992	T0
34.4526	-0.356993	T0
34.4609	-0.356993	T0
34.4697	-0.356992	T0
34.4779	-0.356991	T0
34.4861	-0.35699	T0
34.4945	-0.356988	T0
34.5028	-0.356988	T0
34.5111	-0.356987	T0
34.5196	-0.356988	T0
34.5279	-0.356989	T0
34.5366	-0.356989	T0
34.5444	-0.35699	T0
34.5529	-0.35699	T0
34.5619	-0.356991	T0
34.57	-0.356991	T0
34.5786	-0.356991	T0
34.587	-0.356991	T0
34.5952	-0.356991	T0
34.6033	-0.356991	T0
34.6114	-0.356991	T0
34.6196	-0.356991	T0
34.6283	-0.356992	T0
34.6365	-0.356991	T0
34.6449	-0.35699	T0
34.653	-0.35699	T0
34.6618	-0.35699	T0
34.6697	-0.35699	T0
34.6784	-0.356991	T0
34.6868	-0.356991	T0
34.695	-0.356991	T0
34.7037	-0.356991	T0
34.7117	-0.356991	T0
34.7198	-0.356991	T0
34.7276	-0.356991	T0
34.7364	-0.356991	T0
34.7455	-0.356991	T0
34.7539	-0.356992	T0
34.7619	-0.356992	T0
34.7701	-0.356992	T0
34.7781	-0.356992	T0
34.7869	-0.356991	T0
34.7953	-0.356991	T0
34.8032	-0.35699	T0
34.8116	-0.356989	T0
34.8192	-0.356988	T0
34.8279	-0.356989	T0
34.8367	-0.356989	T0
34.8453	-0.35699	T0
34.8536	-0.356991	T0
34.8617	-0.356993	T0
34.8706	-0.356994	T0
34.8789	-0.356996	T0
34.8868	-0.356998	T0
34.8957	-0.356999	T0
34.904	-0.356999	T0
34.9123	-0.356999	T0
34.9204	-0.357	T0
34.929	-0.356999	T0
34.9366	-0.357	T0
34.9457	-0.357	T0
34.9536	-0.357	T0
34.9619	-0.357	T0
34.9701	-0.357001	T0
34.9786	-0.357002	T0
34.9874	-0.357003	T0
34.9954	-0.357004	T0
35.0041	-0.357006	T0
35.013	-0.357007	T0
35.0204	-0.357009	T0
35.0291	-0.35701	T0
35.0371	-0.357011	T0
35.0458	-0.357012	T0
35.0538	-0.357012	T0
35.0623	-0.357013	T0
35.0705	-0.357013	T0
35.0791	-0.357014	T0
35.087	-0.357015	T0
35.0953	-0.357015	T0
35.104	-0.357016	T0
35.1122	-0.357017	T0
35.12	-0.357019	T0
35.1288	-0.35702	T0
35.1366	-0.35702	T0
35.1456	-0.357021	T0
35.1541	-0.357021	T0
35.1621	-0.357022	T0
35.1708	-0.357022	T0
35.1789	-0.357021	T0
35.1876	-0.357019	T0
35.196	-0.357018	T0
35.2042	-0.357018	T0
35.212	-0.357017	T0
[truncated: 21,831 more rows]

## Sheet: AtLEA4-2_Sucrose
Temperature	Heat Flow (Normalized)	Sample
20.0197	-0.0155309	CS0
20.0195	-0.0155307	CS0
20.02	-0.0155303	CS0
20.0198	-0.0155301	CS0
20.0199	-0.0155298	CS0
20.0199	-0.0155296	CS0
20.0203	-0.0155295	CS0
20.02	-0.0155297	CS0
20.0206	-0.0155298	CS0
20.0195	-0.0155297	CS0
20.0201	-0.0155297	CS0
20.0201	-0.0155295	CS0
20.02	-0.0155293	CS0
20.0204	-0.0155295	CS0
20.0202	-0.0155299	CS0
20.0208	-0.01553	CS0
20.0202	-0.0155302	CS0
20.021	-0.0155306	CS0
20.021	-0.0155308	CS0
20.0215	-0.0155312	CS0
20.0212	-0.0155319	CS0
20.0222	-0.0155326	CS0
20.0221	-0.0155333	CS0
20.0219	-0.0155341	CS0
20.022	-0.0155351	CS0
20.0225	-0.0155365	CS0
20.0227	-0.0155381	CS0
20.0232	-0.01554	CS0
20.0238	-0.0155418	CS0
20.0241	-0.015544	CS0
20.0243	-0.0155466	CS0
20.0243	-0.0155509	CS0
20.0251	-0.0155571	CS0
20.0257	-0.0155669	CS0
20.026	-0.01558	CS0
20.0265	-0.0155999	CS0
20.0271	-0.0156355	CS0
20.0278	-0.0156827	CS0
20.0285	-0.0157518	CS0
20.0296	-0.0158473	CS0
20.0295	-0.0159884	CS0
20.0309	-0.01616	CS0
20.031	-0.0163576	CS0
20.0318	-0.0166277	CS0
20.0327	-0.0169339	CS0
20.034	-0.0172208	CS0
20.0344	-0.0175316	CS0
20.0354	-0.0178847	CS0
20.0371	-0.0182649	CS0
20.0382	-0.0186732	CS0
20.0391	-0.0191113	CS0
20.0405	-0.0195639	CS0
20.0415	-0.0200549	CS0
20.0432	-0.0204867	CS0
20.044	-0.0209546	CS0
20.0454	-0.021417	CS0
20.0466	-0.0219085	CS0
20.0481	-0.0224169	CS0
20.0498	-0.0229767	CS0
20.0517	-0.0235654	CS0
20.0531	-0.0241377	CS0
20.0548	-0.0247363	CS0
20.0566	-0.0253228	CS0
20.0582	-0.0259122	CS0
20.0598	-0.0265413	CS0
20.0616	-0.027202	CS0
20.0637	-0.0279217	CS0
20.0652	-0.0287005	CS0
20.0671	-0.0294802	CS0
20.0695	-0.0302709	CS0
20.0714	-0.0310806	CS0
20.0734	-0.0319618	CS0
20.0757	-0.0328625	CS0
20.0779	-0.0337461	CS0
20.0803	-0.0346986	CS0
20.0824	-0.035665	CS0
20.0855	-0.0366554	CS0
20.088	-0.0376435	CS0
20.0901	-0.0386766	CS0
20.0928	-0.0397436	CS0
20.095	-0.0407678	CS0
20.0978	-0.0418358	CS0
20.1003	-0.0429893	CS0
20.103	-0.0440963	CS0
20.1059	-0.0452757	CS0
20.1089	-0.0464691	CS0
20.1121	-0.0476621	CS0
20.1149	-0.0489485	CS0
20.1177	-0.0502062	CS0
20.1209	-0.051468	CS0
20.1235	-0.0527715	CS0
20.1265	-0.0540201	CS0
20.1298	-0.055367	CS0
20.1324	-0.056716	CS0
20.1352	-0.058146	CS0
20.1386	-0.059497	CS0
20.1417	-0.0608953	CS0
20.1452	-0.062273	CS0
20.1486	-0.0637586	CS0
20.1521	-0.0651513	CS0
20.1554	-0.0665647	CS0
20.1589	-0.0679642	CS0
20.1625	-0.0693874	CS0
20.1668	-0.0708032	CS0
20.1704	-0.0722805	CS0
20.1737	-0.0738335	CS0
20.1769	-0.0753688	CS0
20.1807	-0.0769145	CS0
20.1842	-0.0784922	CS0
20.188	-0.0800317	CS0
20.1922	-0.081526	CS0
20.1959	-0.0830355	CS0
20.2	-0.084544	CS0
20.2045	-0.0860129	CS0
20.2077	-0.0875647	CS0
20.2119	-0.0890747	CS0
20.2159	-0.0905446	CS0
20.2197	-0.092056	CS0
20.2237	-0.0935626	CS0
20.228	-0.0951196	CS0
20.2317	-0.0966432	CS0
20.2362	-0.0981552	CS0
20.2407	-0.0996967	CS0
20.2451	-0.101246	CS0
20.2492	-0.102723	CS0
20.2533	-0.104278	CS0
20.2575	-0.105869	CS0
20.2614	-0.107383	CS0
20.2662	-0.108929	CS0
20.2704	-0.110492	CS0
20.2742	-0.11202	CS0
20.2786	-0.113517	CS0
20.2836	-0.115033	CS0
20.2881	-0.116503	CS0
20.2924	-0.118032	CS0
20.2974	-0.119537	CS0
20.302	-0.120991	CS0
20.3069	-0.122469	CS0
20.3115	-0.123927	CS0
20.3156	-0.12538	CS0
20.3198	-0.126824	CS0
20.3252	-0.128315	CS0
20.3292	-0.129759	CS0
20.3344	-0.131112	CS0
20.3388	-0.13243	CS0
20.344	-0.133807	CS0
20.3488	-0.135216	CS0
20.3531	-0.136652	CS0
20.3579	-0.138091	CS0
20.3633	-0.139471	CS0
20.368	-0.140849	CS0
20.373	-0.142214	CS0
20.3781	-0.143635	CS0
20.3831	-0.145027	CS0
20.3884	-0.146361	CS0
20.3926	-0.147644	CS0
20.3977	-0.148963	CS0
20.4027	-0.150373	CS0
20.4083	-0.151707	CS0
20.4138	-0.153036	CS0
20.418	-0.154314	CS0
20.4232	-0.155581	CS0
20.4284	-0.156811	CS0
20.4337	-0.158023	CS0
20.4391	-0.159274	CS0
20.4439	-0.160506	CS0
20.4492	-0.161713	CS0
20.4545	-0.16288	CS0
20.4597	-0.164136	CS0
20.4653	-0.165448	CS0
20.4703	-0.166733	CS0
20.4755	-0.167956	CS0
20.4804	-0.169144	CS0
20.4862	-0.170382	CS0
20.4913	-0.171542	CS0
20.4972	-0.172778	CS0
20.5029	-0.174016	CS0
20.5085	-0.175185	CS0
20.5134	-0.176348	CS0
20.5186	-0.177483	CS0
20.5248	-0.178641	CS0
20.5298	-0.179849	CS0
20.5353	-0.181016	CS0
20.5406	-0.182063	CS0
20.5465	-0.183132	CS0
20.5521	-0.184185	CS0
20.558	-0.185245	CS0
20.5636	-0.186309	CS0
20.5691	-0.187339	CS0
20.5751	-0.188462	CS0
20.5806	-0.189499	CS0
20.5861	-0.190557	CS0
20.5915	-0.191642	CS0
20.5974	-0.192736	CS0
20.603	-0.193722	CS0
20.6091	-0.194821	CS0
20.6151	-0.195905	CS0
20.6204	-0.196877	CS0
20.6259	-0.197781	CS0
20.632	-0.198719	CS0
20.6378	-0.199746	CS0
20.6438	-0.200721	CS0
20.6492	-0.201703	CS0
20.6544	-0.202734	CS0
20.6611	-0.203742	CS0
20.6671	-0.204715	CS0
20.6727	-0.205773	CS0
20.6791	-0.206841	CS0
20.6845	-0.207795	CS0
20.6902	-0.208632	CS0
20.6966	-0.209566	CS0
20.7025	-0.210449	CS0
20.7089	-0.211342	CS0
20.7144	-0.212172	CS0
20.7205	-0.213179	CS0
20.7269	-0.214091	CS0
20.7328	-0.215003	CS0
20.739	-0.215905	CS0
20.7447	-0.21676	CS0
20.751	-0.217692	CS0
20.7571	-0.218535	CS0
20.7629	-0.219502	CS0
20.7692	-0.220343	CS0
20.7756	-0.221198	CS0
20.7819	-0.222028	CS0
20.7878	-0.222885	CS0
20.7938	-0.223781	CS0
20.8005	-0.224587	CS0
20.8069	-0.225366	CS0
20.8125	-0.226095	CS0
20.8189	-0.226845	CS0
20.8252	-0.227611	CS0
20.8316	-0.228464	CS0
20.8382	-0.229294	CS0
20.8439	-0.230125	CS0
20.8502	-0.23097	CS0
20.8567	-0.231898	CS0
20.8626	-0.232813	CS0
20.8694	-0.23352	CS0
20.8757	-0.234228	CS0
20.8818	-0.234919	CS0
20.8882	-0.235607	CS0
20.8942	-0.236324	CS0
20.9012	-0.23704	CS0
20.9081	-0.237737	CS0
20.914	-0.23844	CS0
20.9205	-0.239247	CS0
20.9268	-0.240059	CS0
20.9334	-0.240913	CS0
20.9397	-0.24169	CS0
20.9464	-0.242456	CS0
20.9527	-0.24319	CS0
20.9594	-0.243906	CS0
20.9657	-0.244617	CS0
20.9725	-0.245357	CS0
20.9788	-0.246037	CS0
20.9855	-0.246691	CS0
20.9918	-0.247342	CS0
20.9989	-0.247937	CS0
21.0051	-0.248551	CS0
21.012	-0.249246	CS0
21.0183	-0.249888	CS0
21.0249	-0.250566	CS0
21.0316	-0.251182	CS0
21.0383	-0.251799	CS0
21.0451	-0.252589	CS0
21.0515	-0.253309	CS0
21.0584	-0.253941	CS0
21.0649	-0.254564	CS0
21.0718	-0.255263	CS0
21.0785	-0.255916	CS0
21.0848	-0.256553	CS0
21.092	-0.257182	CS0
21.099	-0.257744	CS0
21.1057	-0.258257	CS0
21.1125	-0.258822	CS0
21.1192	-0.259505	CS0
21.1261	-0.26015	CS0
21.1328	-0.260735	CS0
21.1396	-0.261333	CS0
21.1456	-0.261912	CS0
21.1525	-0.262565	CS0
21.1597	-0.263147	CS0
21.1667	-0.263734	CS0
21.1735	-0.264278	CS0
21.18	-0.264844	CS0
21.1874	-0.265477	CS0
21.1944	-0.266019	CS0
21.2006	-0.266604	CS0
21.2083	-0.267101	CS0
21.2149	-0.267719	CS0
21.2212	-0.268329	CS0
21.2286	-0.268921	CS0
21.2351	-0.269438	CS0
21.2419	-0.269926	CS0
21.2493	-0.270432	CS0
21.2559	-0.270908	CS0
21.2631	-0.271454	CS0
21.2706	-0.271986	CS0
21.2776	-0.272518	CS0
21.285	-0.272987	CS0
21.2917	-0.273562	CS0
21.2981	-0.274189	CS0
21.3052	-0.274709	CS0
21.3121	-0.275221	CS0
21.319	-0.275729	CS0
21.326	-0.276227	CS0
21.3329	-0.276741	CS0
21.3401	-0.277236	CS0
21.347	-0.277713	CS0
21.3544	-0.278149	CS0
21.3619	-0.278682	CS0
21.3688	-0.279204	CS0
21.3758	-0.27973	CS0
21.3824	-0.280183	CS0
21.3894	-0.280579	CS0
21.3968	-0.280943	CS0
21.404	-0.281333	CS0
21.4105	-0.281744	CS0
21.4176	-0.282238	CS0
21.4245	-0.282664	CS0
21.4319	-0.283108	CS0
21.4392	-0.283664	CS0
21.4469	-0.284137	CS0
21.4535	-0.284668	CS0
21.4609	-0.285163	CS0
21.468	-0.285632	CS0
21.4761	-0.286085	CS0
21.4829	-0.286513	CS0
21.4902	-0.286925	CS0
21.497	-0.287351	CS0
21.5036	-0.287774	CS0
21.5111	-0.288202	CS0
21.5185	-0.288622	CS0
21.5252	-0.289068	CS0
21.533	-0.289488	CS0
21.54	-0.28995	CS0
21.547	-0.290287	CS0
21.555	-0.290723	CS0
21.562	-0.291075	CS0
21.5696	-0.291555	CS0
21.5767	-0.291924	CS0
21.5837	-0.29235	CS0
21.5913	-0.29278	CS0
21.5986	-0.293182	CS0
21.606	-0.293557	CS0
21.6137	-0.293939	CS0
21.6206	-0.294314	CS0
21.628	-0.294661	CS0
21.6354	-0.295021	CS0
21.6426	-0.295374	CS0
21.6497	-0.295781	CS0
21.6576	-0.296145	CS0
21.6641	-0.296508	CS0
21.6718	-0.296872	CS0
21.6791	-0.297182	CS0
21.6865	-0.297496	CS0
21.6947	-0.297887	CS0
21.7022	-0.2983	CS0
21.709	-0.298678	CS0
21.7166	-0.299019	CS0
21.724	-0.299419	CS0
21.7315	-0.299849	CS0
21.7386	-0.300208	CS0
21.7462	-0.30061	CS0
21.7533	-0.300934	CS0
21.7614	-0.301252	CS0
21.7681	-0.301547	CS0
21.7758	-0.301831	CS0
21.7829	-0.30217	CS0
21.7905	-0.302539	CS0
21.7982	-0.302838	CS0
21.8054	-0.303178	CS0
21.8127	-0.303453	CS0
21.8205	-0.303728	CS0
21.8275	-0.304038	CS0
21.8348	-0.304424	CS0
21.8428	-0.304813	CS0
21.8499	-0.305165	CS0
21.8573	-0.305444	CS0
21.8652	-0.305836	CS0
21.8721	-0.306198	CS0
21.8798	-0.306514	CS0
21.8879	-0.306853	CS0
21.895	-0.307113	CS0
21.9026	-0.307333	CS0
21.9102	-0.307545	CS0
21.9179	-0.30782	CS0
21.9253	-0.308116	CS0
21.933	-0.308499	CS0
21.9402	-0.308798	CS0
21.9478	-0.309136	CS0
21.9553	-0.309431	CS0
21.9632	-0.309724	CS0
21.9706	-0.310023	CS0
21.9784	-0.310279	CS0
21.9859	-0.31052	CS0
21.9936	-0.310719	CS0
22.0011	-0.310967	CS0
22.0094	-0.31114	CS0
22.0164	-0.311425	CS0
22.0241	-0.311687	CS0
22.0317	-0.312018	CS0
22.0392	-0.312301	CS0
22.0463	-0.312598	CS0
22.0541	-0.312885	CS0
22.062	-0.313176	CS0
22.0694	-0.313471	CS0
22.0771	-0.313817	CS0
22.0841	-0.314054	CS0
22.0919	-0.314279	CS0
22.0995	-0.314508	CS0
22.1076	-0.314807	CS0
22.1153	-0.315097	CS0
22.123	-0.315331	CS0
22.1308	-0.315543	CS0
22.1379	-0.315719	CS0
22.1456	-0.315889	CS0
22.1531	-0.316274	CS0
22.1612	-0.316469	CS0
22.1693	-0.316615	CS0
22.1771	-0.316799	CS0
22.1843	-0.317011	CS0
22.1917	-0.317204	CS0
22.1998	-0.317491	CS0
22.2075	-0.317771	CS0
22.2153	-0.318081	CS0
22.2228	-0.318415	CS0
22.2308	-0.318618	CS0
22.2384	-0.318944	CS0
22.246	-0.319136	CS0
22.2538	-0.31938	CS0
22.2612	-0.319598	CS0
22.2691	-0.31987	CS0
22.2769	-0.319994	CS0
22.2844	-0.320173	CS0
22.2922	-0.320374	CS0
22.2997	-0.320582	CS0
22.3078	-0.320783	CS0
22.316	-0.320955	CS0
22.3232	-0.321161	CS0
22.3308	-0.321336	CS0
22.3387	-0.321541	CS0
22.3466	-0.321773	CS0
22.3541	-0.322051	CS0
22.3618	-0.322296	CS0
22.37	-0.322515	CS0
22.3778	-0.322706	CS0
22.3854	-0.322894	CS0
22.3932	-0.323116	CS0
22.4012	-0.323344	CS0
22.4086	-0.323567	CS0
22.416	-0.32374	CS0
22.4239	-0.323892	CS0
22.4318	-0.32415	CS0
22.44	-0.324325	CS0
22.4475	-0.324475	CS0
22.4554	-0.324637	CS0
22.4629	-0.32483	CS0
22.4715	-0.32494	CS0
22.4782	-0.325106	CS0
22.4869	-0.325304	CS0
22.4938	-0.325418	CS0
22.5019	-0.325578	CS0
22.5099	-0.325835	CS0
22.5183	-0.32606	CS0
22.5255	-0.326284	CS0
22.5336	-0.326499	CS0
22.5414	-0.326644	CS0
22.5489	-0.326835	CS0
22.557	-0.327055	CS0
22.5648	-0.327225	CS0
22.5727	-0.327299	CS0
22.5803	-0.327473	CS0
22.5881	-0.327635	CS0
22.5962	-0.327765	CS0
22.6036	-0.32796	CS0
22.6119	-0.328175	CS0
22.6201	-0.328398	CS0
22.6276	-0.328541	CS0
22.6357	-0.328662	CS0
22.6435	-0.328868	CS0
22.6514	-0.329082	CS0
22.6589	-0.329201	CS0
22.6668	-0.329359	CS0
22.6747	-0.329542	CS0
22.6823	-0.329596	CS0
22.6908	-0.329723	CS0
22.6986	-0.329865	CS0
22.7067	-0.329993	CS0
22.7142	-0.330167	CS0
22.7224	-0.330297	CS0
22.7306	-0.330439	CS0
22.7382	-0.330631	CS0
22.7461	-0.330804	CS0
22.7542	-0.330903	CS0
22.7618	-0.331057	CS0
22.7692	-0.331203	CS0
22.7776	-0.331346	CS0
22.7853	-0.331473	CS0
22.7932	-0.331542	CS0
22.8012	-0.331683	CS0
22.809	-0.331846	CS0
22.817	-0.332001	CS0
22.8247	-0.332211	CS0
22.8331	-0.332367	CS0
22.8406	-0.33243	CS0
22.8486	-0.332532	CS0
22.8564	-0.332722	CS0
22.8642	-0.3329	CS0
22.8726	-0.333053	CS0
22.8799	-0.333169	CS0
22.8882	-0.333262	CS0
22.8965	-0.333392	CS0
22.9041	-0.33356	CS0
22.9128	-0.333743	CS0
22.9201	-0.333931	CS0
22.9278	-0.334028	CS0
22.9357	-0.334108	CS0
22.9437	-0.334223	CS0
22.9522	-0.33435	CS0
22.9594	-0.334423	CS0
22.968	-0.33447	CS0
22.9757	-0.334591	CS0
22.9837	-0.334718	CS0
22.992	-0.334872	CS0
22.9997	-0.335051	CS0
23.0079	-0.335238	CS0
23.0159	-0.335387	CS0
23.0242	-0.335499	CS0
23.0318	-0.335588	CS0
23.0396	-0.335673	CS0
23.0478	-0.33575	CS0
23.0557	-0.33581	CS0
23.0637	-0.335905	CS0
23.0719	-0.336069	CS0
23.0796	-0.336237	CS0
23.0875	-0.336379	CS0
23.0956	-0.336542	CS0
23.1038	-0.33669	CS0
23.1119	-0.336818	CS0
23.1198	-0.336902	CS0
23.1276	-0.337013	CS0
23.1363	-0.337108	CS0
23.1439	-0.337164	CS0
23.1519	-0.337231	CS0
23.1601	-0.337306	CS0
23.1677	-0.337407	CS0
23.1758	-0.337511	CS0
23.1837	-0.337605	CS0
23.1919	-0.33776	CS0
23.1994	-0.337929	CS0
23.2077	-0.338049	CS0
23.2154	-0.338168	CS0
23.2235	-0.338338	CS0
23.2317	-0.338471	CS0
23.2397	-0.338628	CS0
23.2481	-0.338743	CS0
23.2563	-0.338861	CS0
23.2639	-0.338973	CS0
23.2718	-0.339017	CS0
23.2804	-0.339057	CS0
23.2887	-0.339104	CS0
23.2961	-0.339174	CS0
23.3043	-0.339257	CS0
23.3119	-0.339352	CS0
23.3204	-0.339463	CS0
23.3287	-0.339558	CS0
23.3371	-0.339672	CS0
23.3454	-0.339765	CS0
23.3531	-0.339879	CS0
23.3611	-0.339964	CS0
23.3686	-0.340035	CS0
23.3773	-0.340112	CS0
23.3856	-0.340221	CS0
23.3932	-0.340305	CS0
23.4007	-0.340376	CS0
23.4086	-0.34049	CS0
23.4169	-0.340587	CS0
23.4252	-0.340719	CS0
23.4335	-0.340818	CS0
23.4413	-0.34092	CS0
23.4492	-0.341043	CS0
23.4578	-0.341147	CS0
23.4654	-0.341232	CS0
23.4734	-0.341314	CS0
23.4819	-0.341391	CS0
23.4903	-0.341452	CS0
23.4982	-0.341566	CS0
23.506	-0.341671	CS0
23.5142	-0.341763	CS0
23.5223	-0.341841	CS0
23.5299	-0.341916	CS0
23.5386	-0.342005	CS0
23.5466	-0.342085	CS0
23.5542	-0.342156	CS0
23.5619	-0.342222	CS0
23.571	-0.342295	CS0
23.5785	-0.342349	CS0
23.5874	-0.342422	CS0
23.5949	-0.342506	CS0
23.6037	-0.342594	CS0
23.6109	-0.342678	CS0
23.6197	-0.342769	CS0
23.6275	-0.342866	CS0
23.6357	-0.342946	CS0
23.6432	-0.342994	CS0
23.6521	-0.343036	CS0
23.6602	-0.343074	CS0
23.6682	-0.343109	CS0
23.6765	-0.343158	CS0
23.6849	-0.343217	CS0
23.6927	-0.343276	CS0
23.7004	-0.34334	CS0
23.7088	-0.343423	CS0
23.7166	-0.343517	CS0
23.7247	-0.343621	CS0
23.7332	-0.343739	CS0
23.7406	-0.34386	CS0
23.7495	-0.343973	CS0
23.7571	-0.344069	CS0
23.7652	-0.34415	CS0
23.7733	-0.344227	CS0
23.7816	-0.344293	CS0
23.7904	-0.344349	CS0
23.7981	-0.344395	CS0
23.8061	-0.344433	CS0
23.8139	-0.34448	CS0
23.8221	-0.344516	CS0
23.8305	-0.344549	CS0
23.8382	-0.344617	CS0
23.8464	-0.344697	CS0
23.8554	-0.344771	CS0
23.8625	-0.344827	CS0
23.8707	-0.344883	CS0
23.8798	-0.344939	CS0
23.8875	-0.345014	CS0
23.8952	-0.345082	CS0
23.9032	-0.345161	CS0
23.9117	-0.34523	CS0
23.9199	-0.345278	CS0
23.9284	-0.345324	CS0
23.9369	-0.34538	CS0
23.9447	-0.345446	CS0
23.953	-0.345505	CS0
23.9613	-0.345556	CS0
23.9693	-0.345599	CS0
23.9773	-0.345659	CS0
23.9851	-0.345729	CS0
23.9934	-0.345791	CS0
24.002	-0.345857	CS0
24.0098	-0.345937	CS0
24.0178	-0.346004	CS0
24.0264	-0.346068	CS0
24.0342	-0.346133	CS0
24.0422	-0.346208	CS0
24.0511	-0.346273	CS0
24.0587	-0.346337	CS0
24.0671	-0.34639	CS0
24.0749	-0.346445	CS0
24.0834	-0.346472	CS0
24.0916	-0.346496	CS0
24.0997	-0.346518	CS0
24.1074	-0.346549	CS0
24.116	-0.346577	CS0
24.1238	-0.346598	CS0
24.1323	-0.34662	CS0
24.1403	-0.346658	CS0
24.1483	-0.346707	CS0
24.1565	-0.346759	CS0
24.1643	-0.346816	CS0
24.1731	-0.346879	CS0
24.1811	-0.346953	CS0
24.1892	-0.347029	CS0
24.1968	-0.3471	CS0
24.2054	-0.347152	CS0
24.2137	-0.347187	CS0
24.2218	-0.34722	CS0
24.2307	-0.347264	CS0
24.2385	-0.347299	CS0
24.2465	-0.34734	CS0
24.255	-0.347389	CS0
24.2631	-0.347457	CS0
24.2714	-0.347538	CS0
24.2794	-0.347622	CS0
24.2873	-0.347687	CS0
24.2955	-0.347745	CS0
24.3042	-0.347788	CS0
24.3115	-0.347833	CS0
24.3201	-0.34788	CS0
24.3283	-0.347905	CS0
24.3365	-0.347924	CS0
24.3449	-0.347944	CS0
24.3533	-0.347973	CS0
24.3612	-0.347999	CS0
24.3693	-0.348044	CS0
24.3775	-0.348088	CS0
24.386	-0.348139	CS0
24.3944	-0.348195	CS0
24.4023	-0.348246	CS0
24.4112	-0.348291	CS0
24.419	-0.348335	CS0
24.4272	-0.34837	CS0
24.4353	-0.348405	CS0
24.4435	-0.34845	CS0
24.4513	-0.348495	CS0
24.4604	-0.348547	CS0
24.4677	-0.348603	CS0
24.4761	-0.348645	CS0
24.4842	-0.348673	CS0
24.4927	-0.3487	CS0
24.5006	-0.348727	CS0
24.5086	-0.34876	CS0
24.5172	-0.348801	CS0
24.5251	-0.348834	CS0
24.5336	-0.348874	CS0
24.5414	-0.348924	CS0
24.5499	-0.348976	CS0
24.5578	-0.349024	CS0
24.5667	-0.349059	CS0
24.5749	-0.349087	CS0
24.5829	-0.349115	CS0
24.5912	-0.349142	CS0
24.5992	-0.349173	CS0
24.6075	-0.349204	CS0
24.6158	-0.349229	CS0
24.6239	-0.349256	CS0
24.6322	-0.349289	CS0
24.6403	-0.349319	CS0
24.6486	-0.349345	CS0
24.6568	-0.349362	CS0
24.6651	-0.34938	CS0
24.6732	-0.349399	CS0
24.6812	-0.349421	CS0
24.6895	-0.349447	CS0
24.6979	-0.349478	CS0
24.7061	-0.349509	CS0
24.7144	-0.349547	CS0
24.7217	-0.349585	CS0
24.7298	-0.349625	CS0
24.7383	-0.349667	CS0
24.7465	-0.349704	CS0
24.7552	-0.349743	CS0
24.7632	-0.349784	CS0
24.772	-0.349818	CS0
24.7795	-0.349851	CS0
24.788	-0.349884	CS0
24.7965	-0.34992	CS0
24.8045	-0.349953	CS0
24.8125	-0.34998	CS0
24.8213	-0.350012	CS0
24.8295	-0.350042	CS0
24.8378	-0.350081	CS0
24.8464	-0.350116	CS0
24.8545	-0.350148	CS0
24.8622	-0.350163	CS0
24.8706	-0.350181	CS0
24.8784	-0.350199	CS0
24.8866	-0.350217	CS0
24.8945	-0.350229	CS0
24.9031	-0.350251	CS0
24.911	-0.350275	CS0
24.9202	-0.350299	CS0
24.9277	-0.350327	CS0
24.9362	-0.350353	CS0
24.9446	-0.350386	CS0
24.9526	-0.350422	CS0
24.9608	-0.350459	CS0
24.9691	-0.350499	CS0
24.9777	-0.350539	CS0
24.9862	-0.350576	CS0
24.9941	-0.350597	CS0
25.0025	-0.350623	CS0
25.0105	-0.35064	CS0
25.0187	-0.350655	CS0
25.0271	-0.350673	CS0
25.0355	-0.350685	CS0
25.0432	-0.350705	CS0
25.0521	-0.350731	CS0
25.0603	-0.35076	CS0
25.0681	-0.350797	CS0
25.0763	-0.350844	CS0
25.0846	-0.350878	CS0
25.0932	-0.350905	CS0
25.101	-0.35093	CS0
25.1093	-0.350955	CS0
25.1175	-0.350976	CS0
25.1262	-0.350992	CS0
25.1344	-0.351014	CS0
25.1419	-0.351047	CS0
25.1504	-0.35108	CS0
25.1589	-0.35111	CS0
25.1672	-0.351144	CS0
25.1754	-0.351184	CS0
25.1838	-0.351218	CS0
25.1913	-0.351247	CS0
25.1996	-0.351277	CS0
25.208	-0.35131	CS0
25.2166	-0.35134	CS0
25.2247	-0.351367	CS0
25.233	-0.35139	CS0
25.2411	-0.35141	CS0
25.2497	-0.351435	CS0
25.2587	-0.351462	CS0
25.2661	-0.351488	CS0
25.2745	-0.351511	CS0
25.2829	-0.351531	CS0
25.2911	-0.351551	CS0
25.2992	-0.351575	CS0
25.3072	-0.351599	CS0
25.3165	-0.351624	CS0
25.3233	-0.351649	CS0
25.332	-0.351674	CS0
25.3402	-0.351699	CS0
25.3492	-0.351718	CS0
25.3569	-0.351734	CS0
25.3658	-0.351752	CS0
25.3739	-0.351766	CS0
25.382	-0.351777	CS0
25.3898	-0.351789	CS0
25.3985	-0.351803	CS0
25.4069	-0.351816	CS0
25.415	-0.351838	CS0
25.4229	-0.351869	CS0
25.4315	-0.351899	CS0
25.4399	-0.351926	CS0
25.4479	-0.351946	CS0
25.4565	-0.351967	CS0
25.4646	-0.351987	CS0
25.4728	-0.351999	CS0
25.4809	-0.352017	CS0
25.4896	-0.352037	CS0
25.498	-0.352061	CS0
25.5064	-0.352077	CS0
25.5141	-0.352091	CS0
25.5227	-0.352108	CS0
25.5306	-0.352121	CS0
25.5387	-0.35213	CS0
25.5472	-0.352143	CS0
25.5557	-0.35215	CS0
25.5636	-0.352165	CS0
25.5714	-0.352178	CS0
25.5801	-0.3522	CS0
25.5887	-0.35223	CS0
25.5966	-0.352254	CS0
25.605	-0.352274	CS0
25.6132	-0.352294	CS0
25.6215	-0.352313	CS0
25.6302	-0.352326	CS0
25.6382	-0.352341	CS0
25.6471	-0.352362	CS0
25.6551	-0.352384	CS0
25.6635	-0.352415	CS0
25.6716	-0.352445	CS0
25.6806	-0.352473	CS0
25.6878	-0.352503	CS0
25.6962	-0.352522	CS0
25.705	-0.352542	CS0
25.7129	-0.352562	CS0
25.7212	-0.352582	CS0
25.7296	-0.352595	CS0
25.7373	-0.352609	CS0
25.746	-0.352619	CS0
25.754	-0.352633	CS0
25.7632	-0.352647	CS0
25.7702	-0.352664	CS0
25.7789	-0.352688	CS0
25.7874	-0.352709	CS0
25.7955	-0.352733	CS0
25.8036	-0.352745	CS0
25.8124	-0.352754	CS0
25.8205	-0.352766	CS0
25.8287	-0.352781	CS0
25.8373	-0.352802	CS0
25.8456	-0.352818	CS0
25.8535	-0.352833	CS0
25.8616	-0.352846	CS0
25.8702	-0.352861	CS0
25.8787	-0.352876	CS0
25.8869	-0.352887	CS0
25.895	-0.352902	CS0
25.9031	-0.352913	CS0
25.9117	-0.352922	CS0
25.92	-0.352932	CS0
25.9282	-0.35295	CS0
25.9358	-0.352971	CS0
25.9447	-0.352991	CS0
25.953	-0.353012	CS0
25.9617	-0.353025	CS0
25.9698	-0.353041	CS0
25.9786	-0.353054	CS0
25.9865	-0.353066	CS0
25.9946	-0.353078	CS0
26.0034	-0.353088	CS0
26.011	-0.353102	CS0
26.0188	-0.353121	CS0
26.0273	-0.35314	CS0
26.0355	-0.353153	CS0
26.0441	-0.353163	CS0
26.0527	-0.353171	CS0
26.0609	-0.35318	CS0
26.0688	-0.353188	CS0
26.0772	-0.353202	CS0
26.0855	-0.353227	CS0
26.0942	-0.353252	CS0
26.1024	-0.353273	CS0
26.1106	-0.35329	CS0
26.1189	-0.353302	CS0
26.1272	-0.353312	CS0
26.1352	-0.353329	CS0
26.1442	-0.353345	CS0
26.1522	-0.353372	CS0
26.1605	-0.353389	CS0
26.1688	-0.353406	CS0
26.177	-0.353418	CS0
26.1857	-0.353429	CS0
26.1934	-0.353438	CS0
26.2021	-0.353447	CS0
26.2104	-0.353459	CS0
26.2184	-0.353466	CS0
26.227	-0.353472	CS0
26.2351	-0.353479	CS0
26.2431	-0.353489	CS0
26.2508	-0.353496	CS0
26.2603	-0.353505	CS0
26.2682	-0.353513	CS0
26.2763	-0.353522	CS0
26.2852	-0.353532	CS0
26.2932	-0.353549	CS0
26.3013	-0.353562	CS0
26.3106	-0.353572	CS0
26.3183	-0.353589	CS0
26.3267	-0.353604	CS0
26.3352	-0.35362	CS0
26.3431	-0.353637	CS0
26.3515	-0.35365	CS0
26.3597	-0.35366	CS0
26.3683	-0.353671	CS0
26.3763	-0.353682	CS0
26.3849	-0.353693	CS0
26.3929	-0.353706	CS0
26.4014	-0.353719	CS0
26.4097	-0.353732	CS0
26.4184	-0.353749	CS0
26.4263	-0.353764	CS0
26.4342	-0.353778	CS0
26.4426	-0.353788	CS0
26.4508	-0.353796	CS0
26.4597	-0.353807	CS0
26.468	-0.353817	CS0
26.4759	-0.353824	CS0
26.4842	-0.35383	CS0
26.4925	-0.353839	CS0
26.5009	-0.353852	CS0
26.5091	-0.353867	CS0
26.5173	-0.353886	CS0
26.5257	-0.353907	CS0
26.5341	-0.353927	CS0
26.5427	-0.353944	CS0
26.5509	-0.353963	CS0
26.5594	-0.353986	CS0
26.568	-0.354004	CS0
26.5758	-0.354016	CS0
26.5843	-0.354026	CS0
26.5925	-0.354034	CS0
26.6013	-0.354041	CS0
26.609	-0.354048	CS0
26.618	-0.354055	CS0
26.6256	-0.354063	CS0
26.6338	-0.35407	CS0
26.6415	-0.354077	CS0
26.6503	-0.354085	CS0
26.6589	-0.354093	CS0
26.6669	-0.354105	CS0
26.6746	-0.354122	CS0
26.6839	-0.354135	CS0
26.6919	-0.354147	CS0
26.7003	-0.354164	CS0
26.7091	-0.354178	CS0
26.7166	-0.35419	CS0
26.7248	-0.3542	CS0
26.7342	-0.354212	CS0
26.7418	-0.354221	CS0
26.7503	-0.35423	CS0
26.7581	-0.354237	CS0
26.7667	-0.354244	CS0
26.7751	-0.354251	CS0
26.7836	-0.354259	CS0
26.7916	-0.354266	CS0
26.8001	-0.354274	CS0
26.8085	-0.354282	CS0
26.8169	-0.354289	CS0
26.8249	-0.354297	CS0
26.8335	-0.354305	CS0
26.8416	-0.354312	CS0
26.85	-0.35432	CS0
26.8584	-0.354328	CS0
26.8668	-0.354335	CS0
26.8753	-0.354342	CS0
26.8836	-0.354348	CS0
26.8918	-0.354355	CS0
26.9001	-0.354363	CS0
26.908	-0.354371	CS0
26.9168	-0.354379	CS0
26.9244	-0.354387	CS0
26.9334	-0.354394	CS0
26.9413	-0.354402	CS0
26.9493	-0.35441	CS0
26.9583	-0.354418	CS0
26.9662	-0.354427	CS0
26.9743	-0.354436	CS0
26.9826	-0.354443	CS0
26.991	-0.35445	CS0
26.999	-0.354456	CS0
27.0075	-0.354463	CS0
27.016	-0.35447	CS0
27.0246	-0.354477	CS0
27.0329	-0.354485	CS0
27.0415	-0.354493	CS0
27.0496	-0.354501	CS0
27.0586	-0.354514	CS0
27.0662	-0.354526	CS0
27.0744	-0.354534	CS0
27.0829	-0.354541	CS0
27.0914	-0.354549	CS0
27.0994	-0.354556	CS0
27.1075	-0.354563	CS0
27.1155	-0.35457	CS0
27.124	-0.354577	CS0
27.1327	-0.354584	CS0
27.1409	-0.354591	CS0
27.1491	-0.354599	CS0
27.158	-0.354606	CS0
27.1662	-0.354614	CS0
27.1744	-0.354621	CS0
27.1825	-0.354628	CS0
27.1911	-0.354636	CS0
27.1991	-0.354644	CS0
27.2078	-0.354655	CS0
27.2161	-0.354664	CS0
27.2241	-0.354673	CS0
27.2321	-0.354681	CS0
27.2409	-0.354687	CS0
27.2492	-0.354695	CS0
27.257	-0.354702	CS0
27.2653	-0.354709	CS0
27.2738	-0.354716	CS0
27.282	-0.354721	CS0
27.2905	-0.354728	CS0
27.299	-0.354734	CS0
27.3076	-0.354741	CS0
27.3157	-0.354748	CS0
27.3242	-0.354755	CS0
27.3323	-0.354763	CS0
27.3403	-0.35477	CS0
27.3488	-0.354777	CS0
27.3572	-0.354784	CS0
27.3652	-0.354793	CS0
27.3737	-0.354801	CS0
27.3822	-0.354809	CS0
27.3902	-0.354816	CS0
27.3988	-0.354823	CS0
27.4066	-0.354829	CS0
27.4153	-0.354836	CS0
27.4233	-0.354842	CS0
27.4323	-0.354848	CS0
27.4402	-0.354855	CS0
27.4488	-0.354861	CS0
27.4575	-0.354868	CS0
27.4655	-0.354877	CS0
27.4742	-0.354887	CS0
27.4823	-0.354899	CS0
27.4908	-0.354909	CS0
27.4985	-0.354916	CS0
27.507	-0.354923	CS0
27.5152	-0.354929	CS0
27.5231	-0.354935	CS0
27.5317	-0.354941	CS0
27.5396	-0.354947	CS0
27.5481	-0.354953	CS0
27.5564	-0.354959	CS0
27.5648	-0.354966	CS0
27.5731	-0.354974	CS0
27.5821	-0.354983	CS0
27.5899	-0.35499	CS0
27.5986	-0.355	CS0
27.6067	-0.355009	CS0
27.6156	-0.355021	CS0
27.6238	-0.355031	CS0
27.632	-0.355038	CS0
27.6402	-0.355044	CS0
27.6488	-0.35505	CS0
27.6565	-0.355057	CS0
27.6654	-0.355063	CS0
27.6738	-0.355069	CS0
27.6818	-0.355075	CS0
27.6903	-0.355081	CS0
27.6986	-0.355088	CS0
27.7073	-0.355094	CS0
27.7155	-0.355101	CS0
27.7235	-0.355108	CS0
27.7316	-0.355114	CS0
27.74	-0.355121	CS0
27.7487	-0.355127	CS0
27.757	-0.355133	CS0
27.7649	-0.355141	CS0
27.773	-0.355147	CS0
27.7814	-0.355154	CS0
27.7897	-0.355161	CS0
27.7983	-0.355168	CS0
27.8069	-0.355176	CS0
27.8145	-0.355184	CS0
27.8232	-0.35519	CS0
27.8316	-0.355196	CS0
27.8401	-0.355203	CS0
27.8481	-0.355209	CS0
27.8556	-0.355215	CS0
27.8642	-0.355222	CS0
27.8728	-0.35523	CS0
27.8808	-0.355239	CS0
27.8896	-0.355246	CS0
27.8979	-0.355257	CS0
27.9063	-0.355265	CS0
27.915	-0.355271	CS0
27.9236	-0.355278	CS0
27.9311	-0.355285	CS0
27.9399	-0.355291	CS0
27.9483	-0.355298	CS0
27.9564	-0.355304	CS0
27.9645	-0.35531	CS0
27.9732	-0.355316	CS0
27.9812	-0.355322	CS0
27.9896	-0.355328	CS0
27.9981	-0.355334	CS0
28.0062	-0.35534	CS0
28.0149	-0.355346	CS0
28.0234	-0.355351	CS0
28.0314	-0.355357	CS0
28.0397	-0.355363	CS0
28.0481	-0.355369	CS0
28.0565	-0.355375	CS0
28.0653	-0.35538	CS0
28.0729	-0.355385	CS0
28.0813	-0.35539	CS0
28.0899	-0.355395	CS0
28.098	-0.355401	CS0
28.1061	-0.355406	CS0
28.1146	-0.355411	CS0
28.1233	-0.355417	CS0
28.1313	-0.355423	CS0
28.1396	-0.355429	CS0
28.1475	-0.355435	CS0
28.1565	-0.35544	CS0
28.1643	-0.355445	CS0
28.1728	-0.35545	CS0
28.1816	-0.355454	CS0
28.1896	-0.355459	CS0
28.1979	-0.355464	CS0
28.2066	-0.35547	CS0
28.2147	-0.355475	CS0
28.2226	-0.355481	CS0
28.2313	-0.355486	CS0
28.24	-0.355491	CS0
28.2481	-0.355496	CS0
28.2558	-0.355502	CS0
28.2647	-0.355507	CS0
28.2728	-0.355513	CS0
28.2816	-0.355519	CS0
28.2892	-0.355525	CS0
28.2982	-0.355531	CS0
28.3063	-0.355537	CS0
28.3149	-0.355543	CS0
28.323	-0.355551	CS0
28.3313	-0.355558	CS0
28.3401	-0.355563	CS0
28.3479	-0.355568	CS0
28.3566	-0.355573	CS0
28.3644	-0.355578	CS0
28.3729	-0.355584	CS0
28.3812	-0.355589	CS0
28.3897	-0.355595	CS0
28.3975	-0.3556	CS0
28.4065	-0.355607	CS0
28.4143	-0.355615	CS0
28.4229	-0.355621	CS0
28.4315	-0.355627	CS0
28.4394	-0.355632	CS0
28.4483	-0.355637	CS0
28.456	-0.355643	CS0
28.4646	-0.355649	CS0
28.4738	-0.355654	CS0
28.4815	-0.355661	CS0
28.4906	-0.355671	CS0
28.498	-0.355682	CS0
28.5065	-0.355689	CS0
28.5148	-0.355696	CS0
28.5234	-0.355701	CS0
28.5314	-0.355707	CS0
28.5393	-0.355711	CS0
28.5479	-0.355716	CS0
28.5563	-0.355721	CS0
28.5649	-0.355726	CS0
28.573	-0.355731	CS0
28.5811	-0.355736	CS0
28.5892	-0.355742	CS0
28.5979	-0.355748	CS0
28.6063	-0.355753	CS0
28.6144	-0.355757	CS0
28.6231	-0.355762	CS0
28.6315	-0.355767	CS0
28.6394	-0.355772	CS0
28.6478	-0.355777	CS0
28.6567	-0.355783	CS0
28.6643	-0.35579	CS0
28.6734	-0.355796	CS0
28.6812	-0.355801	CS0
28.6895	-0.355806	CS0
28.6979	-0.355811	CS0
28.7058	-0.355817	CS0
28.7147	-0.355822	CS0
28.7231	-0.355828	CS0
28.7313	-0.355834	CS0
28.7395	-0.35584	CS0
28.7481	-0.355846	CS0
28.7561	-0.355852	CS0
28.7652	-0.355857	CS0
28.7732	-0.355862	CS0
28.7819	-0.355866	CS0
28.7894	-0.355871	CS0
28.798	-0.355876	CS0
28.8061	-0.355881	CS0
28.8147	-0.355886	CS0
28.8231	-0.355891	CS0
28.831	-0.355895	CS0
28.8393	-0.355899	CS0
28.848	-0.355902	CS0
28.8564	-0.355907	CS0
28.8643	-0.355911	CS0
28.8723	-0.355915	CS0
28.8812	-0.35592	CS0
28.8892	-0.355926	CS0
28.8976	-0.355933	CS0
28.906	-0.35594	CS0
28.9152	-0.355946	CS0
28.9232	-0.355952	CS0
28.9314	-0.355957	CS0
28.9402	-0.355963	CS0
28.9482	-0.355968	CS0
28.9561	-0.355973	CS0
28.9648	-0.355977	CS0
28.9732	-0.355982	CS0
28.9812	-0.355987	CS0
28.9898	-0.355992	CS0
28.9976	-0.355996	CS0
29.0066	-0.356	CS0
29.0146	-0.356004	CS0
29.0231	-0.356009	CS0
29.0306	-0.356013	CS0
29.0395	-0.356017	CS0
29.048	-0.356022	CS0
29.0564	-0.356026	CS0
29.0642	-0.356031	CS0
29.0727	-0.356036	CS0
29.0812	-0.356041	CS0
29.0898	-0.356047	CS0
29.0983	-0.356052	CS0
29.1063	-0.356057	CS0
29.1148	-0.356062	CS0
29.1231	-0.356067	CS0
29.1316	-0.356071	CS0
29.1399	-0.356075	CS0
29.1479	-0.356079	CS0
29.1564	-0.356082	CS0
29.1647	-0.356085	CS0
29.1728	-0.356089	CS0
29.1818	-0.356093	CS0
29.19	-0.356098	CS0
29.1981	-0.356102	CS0
29.2063	-0.356107	CS0
29.2149	-0.356111	CS0
29.223	-0.356116	CS0
29.2313	-0.356121	CS0
29.2399	-0.356126	CS0
29.2488	-0.356131	CS0
29.2567	-0.356136	CS0
29.2649	-0.356145	CS0
29.2736	-0.356152	CS0
29.2814	-0.356159	CS0
29.2901	-0.356164	CS0
29.2985	-0.356169	CS0
29.3067	-0.356173	CS0
29.3149	-0.356176	CS0
29.3232	-0.356179	CS0
29.3318	-0.356182	CS0
29.3398	-0.356185	CS0
29.3478	-0.356189	CS0
29.3566	-0.356192	CS0
29.365	-0.356196	CS0
29.3732	-0.3562	CS0
29.381	-0.356203	CS0
29.3895	-0.356206	CS0
29.3986	-0.356209	CS0
29.4069	-0.356212	CS0
29.4147	-0.356215	CS0
29.4234	-0.356218	CS0
29.4314	-0.356222	CS0
29.4402	-0.356225	CS0
29.4485	-0.356229	CS0
29.4564	-0.356233	CS0
29.4652	-0.356237	CS0
29.4736	-0.35624	CS0
29.4816	-0.356245	CS0
29.4899	-0.356248	CS0
29.4979	-0.356252	CS0
29.5066	-0.356256	CS0
29.5149	-0.35626	CS0
29.5231	-0.356264	CS0
29.5317	-0.356267	CS0
29.5401	-0.356271	CS0
29.5481	-0.356274	CS0
29.5564	-0.356277	CS0
29.5648	-0.35628	CS0
29.5734	-0.356282	CS0
29.5817	-0.356286	CS0
29.5898	-0.35629	CS0
29.5984	-0.356293	CS0
29.6071	-0.356296	CS0
29.6151	-0.356299	CS0
29.6236	-0.356302	CS0
29.6318	-0.356305	CS0
29.6399	-0.356306	CS0
29.6484	-0.356308	CS0
29.6573	-0.35631	CS0
29.6654	-0.356312	CS0
29.6735	-0.356315	CS0
29.6815	-0.356318	CS0
29.6898	-0.35632	CS0
29.6982	-0.356323	CS0
29.707	-0.356326	CS0
29.7148	-0.356328	CS0
29.7228	-0.35633	CS0
29.7314	-0.356333	CS0
29.7396	-0.356334	CS0
29.7482	-0.356337	CS0
29.7572	-0.35634	CS0
29.7655	-0.356343	CS0
29.774	-0.356346	CS0
29.782	-0.356348	CS0
29.7902	-0.35635	CS0
29.7987	-0.356353	CS0
29.807	-0.356355	CS0
29.8158	-0.356358	CS0
29.8235	-0.356361	CS0
29.832	-0.356364	CS0
29.8402	-0.356368	CS0
29.848	-0.356371	CS0
29.8564	-0.356375	CS0
29.8649	-0.356377	CS0
29.8732	-0.35638	CS0
29.8819	-0.356382	CS0
29.8905	-0.356383	CS0
29.8985	-0.356385	CS0
29.907	-0.356386	CS0
29.9158	-0.356388	CS0
29.9237	-0.356391	CS0
29.9319	-0.356393	CS0
29.9406	-0.356396	CS0
29.9488	-0.356397	CS0
29.9566	-0.356398	CS0
29.9651	-0.3564	CS0
29.9731	-0.356402	CS0
29.9823	-0.356404	CS0
29.9904	-0.356406	CS0
29.9984	-0.356408	CS0
30.0075	-0.356411	CS0
30.0156	-0.356414	CS0
30.0239	-0.356417	CS0
30.0323	-0.35642	CS0
30.0408	-0.356423	CS0
30.0482	-0.356425	CS0
30.0569	-0.356428	CS0
30.0657	-0.356431	CS0
30.0743	-0.356434	CS0
30.082	-0.356436	CS0
30.0902	-0.356439	CS0
30.0983	-0.356441	CS0
30.1069	-0.356443	CS0
30.1154	-0.356446	CS0
30.1234	-0.356447	CS0
30.1321	-0.356449	CS0
30.1404	-0.35645	CS0
30.1487	-0.356452	CS0
30.1574	-0.356454	CS0
30.1657	-0.356456	CS0
30.174	-0.356458	CS0
30.1824	-0.35646	CS0
30.1907	-0.356462	CS0
30.1983	-0.356465	CS0
30.2071	-0.356469	CS0
30.2153	-0.356471	CS0
30.2237	-0.356473	CS0
30.232	-0.356475	CS0
30.2408	-0.356476	CS0
30.2489	-0.356476	CS0
30.2572	-0.356476	CS0
30.2658	-0.356478	CS0
30.2736	-0.356479	CS0
30.2817	-0.356482	CS0
30.29	-0.356485	CS0
30.2984	-0.35649	CS0
30.3066	-0.356496	CS0
30.3152	-0.356501	CS0
30.3236	-0.356503	CS0
30.3324	-0.356506	CS0
30.3405	-0.356507	CS0
30.3492	-0.356509	CS0
30.3577	-0.356509	CS0
30.3655	-0.356511	CS0
30.3744	-0.356512	CS0
30.3827	-0.356514	CS0
30.391	-0.356515	CS0
30.399	-0.356517	CS0
30.4073	-0.356519	CS0
30.4158	-0.356521	CS0
30.4238	-0.356524	CS0
30.4321	-0.356526	CS0
30.4404	-0.356529	CS0
30.4484	-0.356531	CS0
30.4568	-0.356533	CS0
30.4662	-0.356536	CS0
30.4736	-0.356539	CS0
30.4821	-0.356541	CS0
30.4902	-0.356544	CS0
30.4987	-0.356546	CS0
30.5073	-0.356548	CS0
30.5156	-0.356551	CS0
30.5242	-0.356553	CS0
30.532	-0.356556	CS0
30.5406	-0.356559	CS0
30.549	-0.356562	CS0
30.5578	-0.356565	CS0
30.5665	-0.356567	CS0
30.574	-0.35657	CS0
30.5826	-0.356573	CS0
30.5907	-0.356575	CS0
30.5994	-0.356576	CS0
30.6076	-0.356577	CS0
30.616	-0.356578	CS0
30.624	-0.356579	CS0
30.6326	-0.35658	CS0
30.6405	-0.356583	CS0
30.649	-0.356585	CS0
30.6571	-0.356587	CS0
30.6662	-0.356591	CS0
30.6744	-0.356593	CS0
30.6822	-0.356597	CS0
30.6909	-0.356599	CS0
30.6994	-0.356602	CS0
30.7081	-0.356603	CS0
30.7162	-0.356604	CS0
30.7247	-0.356605	CS0
30.7325	-0.356605	CS0
30.7405	-0.356606	CS0
30.7489	-0.356606	CS0
30.7571	-0.356607	CS0
30.7656	-0.356607	CS0
30.7746	-0.356608	CS0
30.7828	-0.35661	CS0
30.7909	-0.356613	CS0
30.7995	-0.356615	CS0
30.8084	-0.356617	CS0
30.8162	-0.356618	CS0
30.8251	-0.356619	CS0
30.8323	-0.35662	CS0
30.8414	-0.356622	CS0
30.8495	-0.356623	CS0
30.8575	-0.356623	CS0
30.8657	-0.356624	CS0
30.874	-0.356625	CS0
30.8822	-0.356627	CS0
30.8914	-0.35663	CS0
30.8995	-0.356632	CS0
30.9074	-0.356635	CS0
30.9162	-0.356637	CS0
30.9249	-0.356639	CS0
30.9331	-0.356641	CS0
30.9412	-0.356642	CS0
30.9495	-0.356644	CS0
30.9575	-0.356646	CS0
30.9661	-0.356647	CS0
30.9747	-0.35665	CS0
30.9829	-0.356652	CS0
30.9914	-0.356655	CS0
30.9996	-0.356657	CS0
31.0077	-0.356659	CS0
31.0158	-0.356662	CS0
31.0243	-0.356664	CS0
31.0324	-0.356666	CS0
31.0412	-0.356668	CS0
31.0495	-0.35667	CS0
31.0579	-0.356671	CS0
31.0665	-0.356673	CS0
31.0747	-0.356675	CS0
31.0828	-0.356676	CS0
31.0917	-0.356677	CS0
31.0995	-0.356679	CS0
31.1078	-0.35668	CS0
31.1159	-0.356681	CS0
31.1246	-0.356683	CS0
31.1329	-0.356684	CS0
31.141	-0.356685	CS0
31.1498	-0.356687	CS0
31.1579	-0.356689	CS0
31.1663	-0.356691	CS0
31.174	-0.356692	CS0
31.1829	-0.356694	CS0
31.1911	-0.356696	CS0
31.1997	-0.356698	CS0
31.2083	-0.3567	CS0
31.216	-0.356701	CS0
31.2252	-0.356702	CS0
31.2335	-0.356704	CS0
31.2415	-0.356705	CS0
31.2504	-0.356705	CS0
31.2585	-0.356706	CS0
31.2664	-0.356707	CS0
31.2749	-0.356708	CS0
31.2834	-0.356709	CS0
31.2915	-0.35671	CS0
31.3002	-0.356712	CS0
31.3083	-0.356713	CS0
31.3163	-0.356715	CS0
31.3245	-0.356716	CS0
31.3336	-0.356717	CS0
31.342	-0.356717	CS0
31.3502	-0.356718	CS0
31.3583	-0.356719	CS0
31.3672	-0.35672	CS0
31.3751	-0.356721	CS0
31.3839	-0.356722	CS0
31.3919	-0.356723	CS0
31.4	-0.356725	CS0
31.4082	-0.356726	CS0
31.4167	-0.356727	CS0
31.425	-0.356728	CS0
31.434	-0.356729	CS0
31.442	-0.356729	CS0
31.4506	-0.35673	CS0
31.4586	-0.35673	CS0
31.4664	-0.35673	CS0
31.4748	-0.356731	CS0
31.4838	-0.356732	CS0
31.4915	-0.356734	CS0
31.5006	-0.356735	CS0
31.5088	-0.356736	CS0
31.5163	-0.356738	CS0
31.5256	-0.356739	CS0
31.5331	-0.35674	CS0
31.5418	-0.356741	CS0
31.5497	-0.356741	CS0
31.5584	-0.356741	CS0
31.5667	-0.356741	CS0
31.575	-0.35674	CS0
31.5834	-0.35674	CS0
31.5918	-0.35674	CS0
31.6003	-0.356742	CS0
31.6083	-0.356743	CS0
31.6167	-0.356744	CS0
31.6254	-0.356745	CS0
31.6334	-0.356746	CS0
31.6418	-0.356746	CS0
31.6502	-0.356746	CS0
31.6585	-0.356746	CS0
31.6669	-0.356747	CS0
31.6755	-0.356747	CS0
31.6835	-0.356749	CS0
31.692	-0.35675	CS0
31.7003	-0.356751	CS0
31.7084	-0.356752	CS0
31.7164	-0.356751	CS0
31.7249	-0.356752	CS0
31.7335	-0.356753	CS0
31.7413	-0.356753	CS0
31.7503	-0.356754	CS0
31.759	-0.356755	CS0
31.7668	-0.356756	CS0
31.7755	-0.356757	CS0
31.7832	-0.356758	CS0
31.7917	-0.356758	CS0
31.7997	-0.356758	CS0
31.8085	-0.356758	CS0
31.817	-0.356757	CS0
31.8256	-0.356757	CS0
31.8336	-0.356758	CS0
31.8417	-0.356759	CS0
31.8505	-0.356759	CS0
31.8583	-0.356761	CS0
31.8667	-0.356762	CS0
31.8754	-0.356763	CS0
31.8839	-0.356763	CS0
31.8922	-0.356764	CS0
31.9004	-0.356763	CS0
31.9082	-0.356762	CS0
31.9166	-0.356762	CS0
31.9249	-0.356762	CS0
31.9338	-0.356763	CS0
31.9425	-0.356765	CS0
31.9505	-0.356766	CS0
31.9585	-0.356769	CS0
31.9672	-0.356771	CS0
31.9755	-0.356773	CS0
31.9842	-0.356775	CS0
31.992	-0.356777	CS0
32.0004	-0.356778	CS0
32.0091	-0.356779	CS0
32.0174	-0.35678	CS0
32.0255	-0.35678	CS0
32.0337	-0.356781	CS0
32.0421	-0.356781	CS0
32.0507	-0.356781	CS0
32.0589	-0.356781	CS0
32.067	-0.356781	CS0
32.0753	-0.356782	CS0
32.0834	-0.356782	CS0
32.0924	-0.356783	CS0
32.1006	-0.356784	CS0
32.1089	-0.356786	CS0
32.1179	-0.356788	CS0
32.1253	-0.356792	CS0
32.1342	-0.356795	CS0
32.1428	-0.356797	CS0
32.1509	-0.356799	CS0
32.159	-0.356805	CS0
32.1675	-0.356808	CS0
32.1758	-0.356809	CS0
32.1844	-0.356809	CS0
32.1924	-0.356809	CS0
32.2006	-0.35681	CS0
32.2088	-0.35681	CS0
32.217	-0.356809	CS0
32.2254	-0.35681	CS0
32.2342	-0.356811	CS0
32.2422	-0.356812	CS0
32.2512	-0.356814	CS0
32.2592	-0.356816	CS0
32.2676	-0.356818	CS0
32.2755	-0.35682	CS0
32.2841	-0.356822	CS0
32.2925	-0.356823	CS0
32.3003	-0.356825	CS0
32.3095	-0.356826	CS0
32.3177	-0.356828	CS0
32.3261	-0.356829	CS0
32.3341	-0.35683	CS0
32.343	-0.356832	CS0
32.3514	-0.356834	CS0
32.3592	-0.356835	CS0
32.3682	-0.356836	CS0
32.3761	-0.356836	CS0
32.3837	-0.356836	CS0
32.3922	-0.356836	CS0
32.4011	-0.356837	CS0
32.4098	-0.356837	CS0
32.4174	-0.356839	CS0
32.4257	-0.35684	CS0
32.4341	-0.356843	CS0
32.443	-0.356845	CS0
32.4509	-0.356849	CS0
32.4594	-0.356853	CS0
32.4674	-0.356857	CS0
32.4762	-0.356861	CS0
32.4846	-0.356863	CS0
32.4928	-0.356866	CS0
32.5011	-0.356868	CS0
32.5093	-0.356869	CS0
32.5178	-0.356869	CS0
32.5259	-0.35687	CS0
32.5344	-0.356871	CS0
32.5429	-0.356871	CS0
32.5513	-0.356872	CS0
32.5591	-0.356872	CS0
32.5682	-0.356874	CS0
32.5757	-0.356874	CS0
32.5843	-0.356876	CS0
32.5928	-0.356876	CS0
32.6011	-0.356878	CS0
32.6093	-0.356878	CS0
32.6175	-0.356879	CS0
32.6262	-0.35688	CS0
32.6345	-0.356881	CS0
32.6429	-0.356882	CS0
32.6516	-0.356884	CS0
32.6592	-0.356884	CS0
32.668	-0.356885	CS0
32.6757	-0.356885	CS0
32.6842	-0.356886	CS0
32.6925	-0.356887	CS0
32.7009	-0.356888	CS0
32.7092	-0.356888	CS0
32.7175	-0.356889	CS0
32.726	-0.35689	CS0
32.7346	-0.356893	CS0
32.7428	-0.356895	CS0
32.7508	-0.356897	CS0
32.7598	-0.356898	CS0
32.7678	-0.3569	CS0
32.7764	-0.356901	CS0
32.7843	-0.356903	CS0
32.7927	-0.356904	CS0
32.8017	-0.356905	CS0
32.8094	-0.356905	CS0
32.818	-0.356906	CS0
32.8259	-0.356906	CS0
32.8345	-0.356907	CS0
32.8427	-0.356908	CS0
32.8517	-0.35691	CS0
32.8597	-0.356912	CS0
32.868	-0.356914	CS0
32.8762	-0.356916	CS0
32.8844	-0.356918	CS0
32.8931	-0.35692	CS0
32.9016	-0.356922	CS0
32.9101	-0.356923	CS0
32.918	-0.356923	CS0
32.9264	-0.356924	CS0
32.9345	-0.356924	CS0
32.9429	-0.356924	CS0
32.9513	-0.356925	CS0
32.9601	-0.356926	CS0
32.9681	-0.356927	CS0
32.9766	-0.356927	CS0
32.9847	-0.356928	CS0
32.9931	-0.356929	CS0
33.0016	-0.356929	CS0
33.0098	-0.35693	CS0
33.0175	-0.35693	CS0
33.0263	-0.356931	CS0
33.0347	-0.356931	CS0
33.0428	-0.356932	CS0
33.0511	-0.356933	CS0
33.0596	-0.356934	CS0
33.0684	-0.356935	CS0
33.0763	-0.356937	CS0
33.0849	-0.356937	CS0
33.0932	-0.356937	CS0
33.1015	-0.356937	CS0
33.1098	-0.356937	CS0
33.1183	-0.356936	CS0
33.1263	-0.356937	CS0
33.1345	-0.356937	CS0
33.1431	-0.356937	CS0
33.1513	-0.356938	CS0
33.1596	-0.356939	CS0
33.168	-0.35694	CS0
33.1763	-0.356941	CS0
33.1851	-0.356942	CS0
33.1929	-0.356943	CS0
33.2016	-0.356943	CS0
33.2101	-0.356942	CS0
33.2183	-0.356942	CS0
33.2267	-0.35694	CS0
33.2345	-0.356939	CS0
33.2436	-0.356939	CS0
33.2512	-0.356939	CS0
33.2601	-0.356938	CS0
33.2686	-0.356938	CS0
33.277	-0.356939	CS0
33.2855	-0.35694	CS0
33.2938	-0.35694	CS0
33.3019	-0.35694	CS0
33.3101	-0.356939	CS0
33.3189	-0.356939	CS0
33.3265	-0.356939	CS0
33.3354	-0.35694	CS0
33.3432	-0.356941	CS0
33.3514	-0.356943	CS0
33.36	-0.356944	CS0
33.3685	-0.356945	CS0
33.3768	-0.356947	CS0
33.385	-0.356948	CS0
33.3933	-0.356949	CS0
33.4021	-0.356949	CS0
33.4104	-0.356949	CS0
33.4184	-0.356948	CS0
33.4269	-0.356946	CS0
33.4353	-0.356944	CS0
33.4433	-0.356941	CS0
33.4517	-0.35694	CS0
33.4603	-0.356937	CS0
33.4679	-0.356936	CS0
33.4765	-0.356934	CS0
33.4852	-0.356932	CS0
33.493	-0.356932	CS0
33.5017	-0.356932	CS0
33.51	-0.356932	CS0
33.5184	-0.356933	CS0
33.527	-0.356936	CS0
33.5353	-0.35694	CS0
33.5433	-0.356946	CS0
33.5524	-0.356951	CS0
33.5604	-0.356954	CS0
33.5686	-0.356955	CS0
33.5769	-0.356954	CS0
33.5853	-0.356954	CS0
33.5935	-0.356954	CS0
33.6019	-0.356954	CS0
33.6105	-0.356954	CS0
33.6185	-0.356953	CS0
33.6268	-0.356952	CS0
33.6348	-0.35695	CS0
33.6433	-0.35695	CS0
33.652	-0.35695	CS0
33.6604	-0.35695	CS0
33.6687	-0.35695	CS0
33.6775	-0.35695	CS0
33.6855	-0.35695	CS0
33.6939	-0.356951	CS0
33.7023	-0.35695	CS0
33.7102	-0.35695	CS0
33.7187	-0.356949	CS0
33.7267	-0.356949	CS0
33.7353	-0.35695	CS0
33.744	-0.35695	CS0
33.752	-0.35695	CS0
33.7605	-0.35695	CS0
33.7688	-0.356951	CS0
33.7771	-0.356951	CS0
33.7857	-0.356952	CS0
33.7936	-0.356952	CS0
33.8024	-0.356952	CS0
33.8106	-0.356952	CS0
33.8192	-0.356952	CS0
33.8273	-0.356953	CS0
33.8354	-0.356952	CS0
33.8437	-0.356951	CS0
33.852	-0.356949	CS0
33.8604	-0.356948	CS0
33.8687	-0.356947	CS0
33.877	-0.356946	CS0
33.8862	-0.356946	CS0
33.8941	-0.356946	CS0
33.9023	-0.356947	CS0
33.9107	-0.356948	CS0
33.9187	-0.35695	CS0
33.9271	-0.356951	CS0
33.9364	-0.356951	CS0
33.9446	-0.356952	CS0
33.9522	-0.356952	CS0
33.9607	-0.356953	CS0
33.9693	-0.356952	CS0
33.9772	-0.356951	CS0
33.9856	-0.356951	CS0
33.9942	-0.356951	CS0
34.0023	-0.356951	CS0
34.0106	-0.356951	CS0
34.019	-0.35695	CS0
34.0271	-0.35695	CS0
34.0364	-0.356951	CS0
34.0444	-0.356952	CS0
34.0525	-0.356952	CS0
34.0611	-0.356952	CS0
34.069	-0.356953	CS0
34.0779	-0.356953	CS0
34.0851	-0.356954	CS0
34.0939	-0.356955	CS0
34.1028	-0.356956	CS0
34.1108	-0.356957	CS0
34.1195	-0.356958	CS0
34.1281	-0.356961	CS0
34.1357	-0.356962	CS0
34.1442	-0.356963	CS0
34.1525	-0.356964	CS0
34.1615	-0.356965	CS0
34.1699	-0.356966	CS0
34.1779	-0.356966	CS0
34.1863	-0.356966	CS0
34.1941	-0.356966	CS0
34.203	-0.356965	CS0
34.2107	-0.356965	CS0
34.2191	-0.356966	CS0
34.2279	-0.356966	CS0
34.2364	-0.356967	CS0
34.2443	-0.356969	CS0
34.2528	-0.356971	CS0
34.2611	-0.356972	CS0
34.2695	-0.356972	CS0
34.2776	-0.356971	CS0
34.2861	-0.35697	CS0
34.2947	-0.356969	CS0
34.303	-0.356967	CS0
34.3113	-0.356966	CS0
34.3196	-0.356965	CS0
34.3281	-0.356965	CS0
34.3363	-0.356968	CS0
34.3447	-0.356973	CS0
34.3529	-0.356979	CS0
34.3612	-0.356982	CS0
34.3693	-0.356983	CS0
34.378	-0.356984	CS0
34.3862	-0.356984	CS0
34.394	-0.356985	CS0
34.4028	-0.356985	CS0
34.4113	-0.356986	CS0
34.4195	-0.356987	CS0
34.4274	-0.356988	CS0
34.4362	-0.35699	CS0
34.4447	-0.356992	CS0
34.4526	-0.356993	CS0
34.4609	-0.356993	CS0
34.4697	-0.356992	CS0
34.4779	-0.356991	CS0
34.4861	-0.35699	CS0
34.4945	-0.356988	CS0
34.5028	-0.356988	CS0
34.5111	-0.356987	CS0
34.5196	-0.356988	CS0
34.5279	-0.356989	CS0
34.5366	-0.356989	CS0
34.5444	-0.35699	CS0
34.5529	-0.35699	CS0
34.5619	-0.356991	CS0
34.57	-0.356991	CS0
34.5786	-0.356991	CS0
34.587	-0.356991	CS0
34.5952	-0.356991	CS0
34.6033	-0.356991	CS0
34.6114	-0.356991	CS0
34.6196	-0.356991	CS0
34.6283	-0.356992	CS0
34.6365	-0.356991	CS0
34.6449	-0.35699	CS0
34.653	-0.35699	CS0
34.6618	-0.35699	CS0
34.6697	-0.35699	CS0
34.6784	-0.356991	CS0
34.6868	-0.356991	CS0
34.695	-0.356991	CS0
34.7037	-0.356991	CS0
34.7117	-0.356991	CS0
34.7198	-0.356991	CS0
34.7276	-0.356991	CS0
34.7364	-0.356991	CS0
34.7455	-0.356991	CS0
34.7539	-0.356992	CS0
34.7619	-0.356992	CS0
34.7701	-0.356992	CS0
34.7781	-0.356992	CS0
34.7869	-0.356991	CS0
34.7953	-0.356991	CS0
34.8032	-0.35699	CS0
34.8116	-0.356989	CS0
34.8192	-0.356988	CS0
34.8279	-0.356989	CS0
34.8367	-0.356989	CS0
34.8453	-0.35699	CS0
34.8536	-0.356991	CS0
34.8617	-0.356993	CS0
34.8706	-0.356994	CS0
34.8789	-0.356996	CS0
34.8868	-0.356998	CS0
34.8957	-0.356999	CS0
34.904	-0.356999	CS0
34.9123	-0.356999	CS0
34.9204	-0.357	CS0
34.929	-0.356999	CS0
34.9366	-0.357	CS0
34.9457	-0.357	CS0
34.9536	-0.357	CS0
34.9619	-0.357	CS0
34.9701	-0.357001	CS0
34.9786	-0.357002	CS0
34.9874	-0.357003	CS0
34.9954	-0.357004	CS0
35.0041	-0.357006	CS0
35.013	-0.357007	CS0
35.0204	-0.357009	CS0
35.0291	-0.35701	CS0
35.0371	-0.357011	CS0
35.0458	-0.357012	CS0
35.0538	-0.357012	CS0
35.0623	-0.357013	CS0
35.0705	-0.357013	CS0
35.0791	-0.357014	CS0
35.087	-0.357015	CS0
35.0953	-0.357015	CS0
35.104	-0.357016	CS0
35.1122	-0.357017	CS0
35.12	-0.357019	CS0
35.1288	-0.35702	CS0
35.1366	-0.35702	CS0
35.1456	-0.357021	CS0
35.1541	-0.357021	CS0
35.1621	-0.357022	CS0
35.1708	-0.357022	CS0
35.1789	-0.357021	CS0
35.1876	-0.357019	CS0
35.196	-0.357018	CS0
35.2042	-0.357018	CS0
35.212	-0.357017	CS0
[truncated: 21,831 more rows]

## Sheet: AvLEA1C_Trehalose
Temperature	Heat Flow (Normalized)	Sample
20.0202	-0.0154276	T0
20.0197	-0.0154279	T0
20.0201	-0.015428	T0
20.0199	-0.0154281	T0
20.0198	-0.0154282	T0
20.0194	-0.0154284	T0
20.0199	-0.0154284	T0
20.02	-0.0154285	T0
20.02	-0.0154285	T0
20.0205	-0.0154286	T0
20.02	-0.0154287	T0
20.0201	-0.0154291	T0
20.0204	-0.0154296	T0
20.0201	-0.01543	T0
20.0205	-0.0154306	T0
20.0201	-0.0154312	T0
20.0204	-0.0154318	T0
20.0209	-0.015432	T0
20.021	-0.0154323	T0
20.0212	-0.0154325	T0
20.0213	-0.0154328	T0
20.0215	-0.0154328	T0
20.0216	-0.0154328	T0
20.022	-0.0154333	T0
20.0218	-0.0154338	T0
20.0226	-0.0154347	T0
20.0228	-0.0154356	T0
20.023	-0.015437	T0
20.0235	-0.0154408	T0
20.0234	-0.015448	T0
20.0246	-0.0154577	T0
20.025	-0.0154697	T0
20.0256	-0.0154857	T0
20.0253	-0.0155167	T0
20.0263	-0.0155595	T0
20.0267	-0.0156172	T0
20.0268	-0.0156938	T0
20.0279	-0.0158114	T0
20.0288	-0.0159594	T0
20.0297	-0.0161411	T0
20.03	-0.0163723	T0
20.031	-0.0166178	T0
20.031	-0.0168545	T0
20.0321	-0.0170929	T0
20.0329	-0.0173894	T0
20.0335	-0.0176559	T0
20.0351	-0.0179232	T0
20.0362	-0.018229	T0
20.0377	-0.0185668	T0
20.0387	-0.0188573	T0
20.0398	-0.0191424	T0
20.0416	-0.0194914	T0
20.0426	-0.0197953	T0
20.0434	-0.0201562	T0
20.045	-0.0205361	T0
20.0463	-0.020962	T0
20.0473	-0.0213518	T0
20.0488	-0.0217598	T0
20.0507	-0.0222228	T0
20.0521	-0.0226602	T0
20.0544	-0.0231346	T0
20.0558	-0.0236625	T0
20.0573	-0.0241869	T0
20.0598	-0.0247573	T0
20.0612	-0.0253235	T0
20.0636	-0.0259307	T0
20.0653	-0.0265552	T0
20.0677	-0.0272254	T0
20.069	-0.0278742	T0
20.0711	-0.0285828	T0
20.0737	-0.0293318	T0
20.0763	-0.0299812	T0
20.0787	-0.0306735	T0
20.081	-0.0314839	T0
20.084	-0.0322817	T0
20.086	-0.0331482	T0
20.0879	-0.0340355	T0
20.0904	-0.0349265	T0
20.0932	-0.0359194	T0
20.0954	-0.0369568	T0
20.0981	-0.0380175	T0
20.1007	-0.0391476	T0
20.104	-0.0402995	T0
20.1065	-0.0414401	T0
20.1098	-0.0425932	T0
20.1125	-0.0437225	T0
20.115	-0.044902	T0
20.1187	-0.04607	T0
20.1215	-0.0472164	T0
20.1244	-0.04846	T0
20.1273	-0.0497117	T0
20.1306	-0.0508824	T0
20.134	-0.0521294	T0
20.1377	-0.053417	T0
20.1411	-0.0547161	T0
20.1442	-0.0559462	T0
20.1476	-0.0572304	T0
20.151	-0.0585486	T0
20.1547	-0.0599078	T0
20.1583	-0.0612913	T0
20.161	-0.0626262	T0
20.1652	-0.0639918	T0
20.1685	-0.0653895	T0
20.1721	-0.0667684	T0
20.1762	-0.0681957	T0
20.1797	-0.0696211	T0
20.1836	-0.0710625	T0
20.1879	-0.0724852	T0
20.1911	-0.0739919	T0
20.1955	-0.0754485	T0
20.1996	-0.0768895	T0
20.2033	-0.0783611	T0
20.2075	-0.0798082	T0
20.2117	-0.0813006	T0
20.2158	-0.0827839	T0
20.2198	-0.0842318	T0
20.2239	-0.0856837	T0
20.2282	-0.0871968	T0
20.232	-0.0887048	T0
20.2358	-0.0901879	T0
20.2406	-0.0916292	T0
20.2453	-0.093123	T0
20.2491	-0.0946379	T0
20.2538	-0.0961271	T0
20.2581	-0.0975953	T0
20.2622	-0.0990605	T0
20.2669	-0.100422	T0
20.2715	-0.101856	T0
20.2759	-0.10332	T0
20.2802	-0.104831	T0
20.2852	-0.106281	T0
20.2897	-0.107703	T0
20.294	-0.109175	T0
20.2986	-0.110672	T0
20.304	-0.112135	T0
20.309	-0.113659	T0
20.3125	-0.115112	T0
20.3175	-0.116513	T0
20.3222	-0.117853	T0
20.3269	-0.11915	T0
20.3319	-0.120525	T0
20.3361	-0.121933	T0
20.3403	-0.123315	T0
20.3456	-0.1247	T0
20.3511	-0.126098	T0
20.3564	-0.127514	T0
20.3615	-0.128944	T0
20.3663	-0.130327	T0
20.3715	-0.131723	T0
20.3764	-0.133081	T0
20.3811	-0.134413	T0
20.3866	-0.135705	T0
20.3909	-0.137086	T0
20.3959	-0.138398	T0
20.4013	-0.139686	T0
20.4063	-0.140908	T0
20.411	-0.14218	T0
20.4166	-0.143445	T0
20.4215	-0.144701	T0
20.4269	-0.145926	T0
20.4322	-0.147223	T0
20.4378	-0.148484	T0
20.4427	-0.14972	T0
20.4481	-0.150988	T0
20.4535	-0.152276	T0
20.4589	-0.153467	T0
20.4643	-0.154676	T0
20.4696	-0.155893	T0
20.4752	-0.157169	T0
20.4806	-0.158364	T0
20.4858	-0.159504	T0
20.4906	-0.160679	T0
20.4967	-0.161847	T0
20.5023	-0.162928	T0
20.5071	-0.164086	T0
20.5129	-0.165242	T0
20.5191	-0.166298	T0
20.5244	-0.167442	T0
20.5299	-0.168589	T0
20.5352	-0.169746	T0
20.5412	-0.170901	T0
20.5469	-0.172014	T0
20.5526	-0.173102	T0
20.5577	-0.174171	T0
20.5636	-0.175186	T0
20.569	-0.176283	T0
20.5751	-0.177318	T0
20.5808	-0.17828	T0
20.587	-0.179372	T0
20.5922	-0.18046	T0
20.598	-0.181502	T0
20.6038	-0.182501	T0
20.6094	-0.183535	T0
20.6159	-0.184532	T0
20.6215	-0.185555	T0
20.6273	-0.186519	T0
20.6328	-0.187485	T0
20.639	-0.188526	T0
20.6448	-0.189502	T0
20.6511	-0.190487	T0
20.6566	-0.191483	T0
20.6622	-0.192411	T0
20.6685	-0.19334	T0
20.6745	-0.194303	T0
20.6802	-0.195192	T0
20.686	-0.196125	T0
20.6924	-0.19705	T0
20.6985	-0.197975	T0
20.7048	-0.19889	T0
20.7105	-0.199811	T0
20.7164	-0.200696	T0
20.7225	-0.201607	T0
20.7283	-0.202511	T0
20.7345	-0.203377	T0
20.7413	-0.204262	T0
20.7473	-0.205081	T0
20.7536	-0.205935	T0
20.7598	-0.206824	T0
20.766	-0.207657	T0
20.7716	-0.208555	T0
20.778	-0.209352	T0
20.7841	-0.210197	T0
20.7901	-0.211071	T0
20.7965	-0.211882	T0
20.8029	-0.212786	T0
20.8092	-0.213613	T0
20.8157	-0.214458	T0
20.8222	-0.215272	T0
20.8278	-0.21603	T0
20.8342	-0.216733	T0
20.841	-0.217525	T0
20.8473	-0.21826	T0
20.8537	-0.219007	T0
20.8597	-0.219803	T0
20.8662	-0.220488	T0
20.8725	-0.221266	T0
20.879	-0.22202	T0
20.8855	-0.222843	T0
20.8917	-0.223678	T0
20.8988	-0.224405	T0
20.9053	-0.225124	T0
20.9117	-0.225895	T0
20.9181	-0.226568	T0
20.9247	-0.227332	T0
20.931	-0.228048	T0
20.9375	-0.228734	T0
20.9439	-0.2295	T0
20.9505	-0.230149	T0
20.9573	-0.230853	T0
20.9632	-0.231571	T0
20.9702	-0.232258	T0
20.9766	-0.232912	T0
20.9836	-0.233561	T0
20.9896	-0.234199	T0
20.9962	-0.234942	T0
21.0029	-0.235591	T0
21.0096	-0.236279	T0
21.0161	-0.237008	T0
21.0231	-0.237532	T0
21.03	-0.238078	T0
21.0361	-0.238789	T0
21.043	-0.239505	T0
21.0501	-0.240186	T0
21.0568	-0.240814	T0
21.0638	-0.241411	T0
21.0704	-0.242107	T0
21.0772	-0.242768	T0
21.0839	-0.243388	T0
21.0903	-0.243931	T0
21.0976	-0.244484	T0
21.1038	-0.245072	T0
21.1107	-0.245681	T0
21.1175	-0.246271	T0
21.1238	-0.246906	T0
21.1311	-0.247527	T0
21.1381	-0.248115	T0
21.1448	-0.248695	T0
21.1518	-0.249302	T0
21.1584	-0.249875	T0
21.1659	-0.250465	T0
21.1725	-0.250967	T0
21.1788	-0.251544	T0
21.1857	-0.252147	T0
21.1929	-0.252737	T0
21.1994	-0.253243	T0
21.2061	-0.253769	T0
21.2139	-0.254363	T0
21.2204	-0.25491	T0
21.2277	-0.255441	T0
21.2348	-0.256028	T0
21.2419	-0.256579	T0
21.2488	-0.257095	T0
21.2545	-0.257552	T0
21.2623	-0.258074	T0
21.2689	-0.258609	T0
21.2765	-0.259118	T0
21.2831	-0.259609	T0
21.2905	-0.260161	T0
21.2976	-0.260709	T0
21.3045	-0.261181	T0
21.312	-0.261667	T0
21.3185	-0.262085	T0
21.3261	-0.262574	T0
21.3325	-0.263085	T0
21.3395	-0.263586	T0
21.3465	-0.264092	T0
21.3539	-0.264565	T0
21.3606	-0.265054	T0
21.3682	-0.265571	T0
21.3756	-0.266078	T0
21.382	-0.26652	T0
21.389	-0.266928	T0
21.3965	-0.267267	T0
21.4036	-0.2676	T0
21.4106	-0.268033	T0
21.4174	-0.268556	T0
21.4253	-0.269063	T0
21.4322	-0.269584	T0
21.4395	-0.270028	T0
21.447	-0.270459	T0
21.4541	-0.270877	T0
21.4612	-0.271387	T0
21.4684	-0.271829	T0
21.4754	-0.272215	T0
21.4832	-0.272536	T0
21.4899	-0.272991	T0
21.4969	-0.273441	T0
21.5044	-0.273899	T0
21.5122	-0.274317	T0
21.5192	-0.274772	T0
21.5258	-0.27514	T0
21.5331	-0.275507	T0
21.5405	-0.27593	T0
21.5471	-0.276383	T0
21.5548	-0.276764	T0
21.5621	-0.277105	T0
21.5691	-0.277534	T0
21.5764	-0.277943	T0
21.5838	-0.278328	T0
21.5921	-0.278715	T0
21.5984	-0.279106	T0
21.6061	-0.279417	T0
21.6137	-0.279857	T0
21.6205	-0.280216	T0
21.6282	-0.280627	T0
21.6356	-0.280935	T0
21.6428	-0.281325	T0
21.6496	-0.28166	T0
21.6571	-0.28204	T0
21.665	-0.28237	T0
21.6724	-0.282731	T0
21.6799	-0.28304	T0
21.6867	-0.283376	T0
21.6941	-0.283728	T0
21.7012	-0.284093	T0
21.7095	-0.284457	T0
21.7168	-0.284787	T0
21.7242	-0.285197	T0
21.7316	-0.285513	T0
21.7388	-0.285876	T0
21.7467	-0.286246	T0
21.7537	-0.286585	T0
21.7613	-0.286965	T0
21.7687	-0.287285	T0
21.7764	-0.287639	T0
21.7841	-0.287949	T0
21.7912	-0.288302	T0
21.799	-0.288562	T0
21.8057	-0.288857	T0
21.8134	-0.289111	T0
21.8206	-0.289343	T0
21.8285	-0.289588	T0
21.8358	-0.289919	T0
21.8438	-0.290263	T0
21.851	-0.290605	T0
21.8581	-0.290956	T0
21.8656	-0.291333	T0
21.8733	-0.291662	T0
21.8805	-0.291947	T0
21.8879	-0.292265	T0
21.8957	-0.292617	T0
21.9032	-0.29279	T0
21.9109	-0.293065	T0
21.9184	-0.293355	T0
21.9258	-0.293615	T0
21.9338	-0.293919	T0
21.9416	-0.294334	T0
21.949	-0.294621	T0
21.9565	-0.294923	T0
21.9643	-0.295196	T0
21.9717	-0.295445	T0
21.9795	-0.295777	T0
21.9863	-0.296011	T0
21.9937	-0.296206	T0
22.0019	-0.296409	T0
22.0092	-0.296551	T0
22.0175	-0.296766	T0
22.0245	-0.297039	T0
22.0321	-0.297258	T0
22.0398	-0.297576	T0
22.0471	-0.29792	T0
22.0552	-0.298231	T0
22.0625	-0.298576	T0
22.0705	-0.298876	T0
22.0778	-0.299205	T0
22.085	-0.299499	T0
22.0933	-0.299727	T0
22.1012	-0.299951	T0
22.1089	-0.300105	T0
22.1165	-0.300297	T0
22.124	-0.300523	T0
22.1319	-0.300739	T0
22.1398	-0.301026	T0
22.1468	-0.30124	T0
22.1546	-0.301459	T0
22.1625	-0.301769	T0
22.1695	-0.302048	T0
22.1775	-0.302243	T0
22.1851	-0.302525	T0
22.1927	-0.302728	T0
22.201	-0.302994	T0
22.2083	-0.303215	T0
22.2164	-0.303421	T0
22.2242	-0.303628	T0
22.2315	-0.303817	T0
22.2395	-0.303995	T0
22.2472	-0.304238	T0
22.2551	-0.304429	T0
22.2629	-0.304608	T0
22.2707	-0.304883	T0
22.2783	-0.305137	T0
22.2857	-0.305361	T0
22.2934	-0.305599	T0
22.3013	-0.305822	T0
22.3086	-0.30604	T0
22.3171	-0.306225	T0
22.3246	-0.306415	T0
22.3326	-0.306637	T0
22.3402	-0.306872	T0
22.3476	-0.307088	T0
22.3556	-0.307327	T0
22.3636	-0.307598	T0
22.3716	-0.307768	T0
22.3786	-0.307982	T0
22.3864	-0.308132	T0
22.3943	-0.308296	T0
22.402	-0.308419	T0
22.4104	-0.308567	T0
22.4179	-0.308737	T0
22.4253	-0.308943	T0
22.4329	-0.309196	T0
22.4414	-0.309345	T0
22.4486	-0.309668	T0
22.4566	-0.309911	T0
22.4646	-0.310096	T0
22.472	-0.310285	T0
22.4795	-0.310422	T0
22.4874	-0.310634	T0
22.4956	-0.310768	T0
22.5034	-0.310906	T0
22.5118	-0.311023	T0
22.5194	-0.311257	T0
22.5273	-0.311434	T0
22.535	-0.311611	T0
22.5432	-0.311851	T0
22.5509	-0.312094	T0
22.5588	-0.312264	T0
22.5665	-0.312386	T0
22.5742	-0.312589	T0
22.5822	-0.312714	T0
22.5901	-0.312839	T0
22.5985	-0.312936	T0
22.6058	-0.313099	T0
22.6143	-0.313269	T0
22.622	-0.313431	T0
22.6298	-0.313674	T0
22.6373	-0.313943	T0
22.6455	-0.314091	T0
22.6527	-0.314271	T0
22.6605	-0.314444	T0
22.6686	-0.314583	T0
22.6765	-0.314721	T0
22.6844	-0.3148	T0
22.6922	-0.314957	T0
22.7008	-0.315112	T0
22.7085	-0.315234	T0
22.716	-0.315402	T0
22.7241	-0.315561	T0
22.7326	-0.315679	T0
22.7406	-0.315819	T0
22.7475	-0.315935	T0
22.7558	-0.316124	T0
22.7638	-0.316314	T0
22.7714	-0.316428	T0
22.7796	-0.316609	T0
22.7873	-0.316823	T0
22.7953	-0.316996	T0
22.8035	-0.317068	T0
22.8111	-0.317141	T0
22.8193	-0.317242	T0
22.8277	-0.31738	T0
22.8355	-0.317439	T0
22.843	-0.317582	T0
22.8511	-0.31779	T0
22.8583	-0.318	T0
22.8667	-0.318157	T0
22.8749	-0.318318	T0
22.8824	-0.318484	T0
22.8909	-0.318552	T0
22.8989	-0.318663	T0
22.9067	-0.318805	T0
22.9147	-0.318947	T0
22.9221	-0.319023	T0
22.9301	-0.319141	T0
22.9386	-0.319347	T0
22.9465	-0.319562	T0
22.9546	-0.31976	T0
22.9622	-0.319942	T0
22.9703	-0.320071	T0
22.9779	-0.320156	T0
22.9866	-0.320276	T0
22.9941	-0.320441	T0
23.0021	-0.320513	T0
23.0101	-0.320616	T0
23.0178	-0.320651	T0
23.0258	-0.320737	T0
23.0341	-0.320812	T0
23.0424	-0.320927	T0
23.0502	-0.321006	T0
23.058	-0.32105	T0
23.066	-0.321127	T0
23.0741	-0.321199	T0
23.0824	-0.32129	T0
23.0903	-0.321403	T0
23.0983	-0.321548	T0
23.1064	-0.321728	T0
23.1141	-0.321932	T0
23.122	-0.322128	T0
23.1298	-0.322297	T0
23.1386	-0.322435	T0
23.1462	-0.32253	T0
23.1545	-0.322632	T0
23.1625	-0.32271	T0
23.1702	-0.322749	T0
23.1784	-0.322834	T0
23.1868	-0.322891	T0
23.1946	-0.322937	T0
23.2025	-0.32299	T0
23.2107	-0.323042	T0
23.2178	-0.323157	T0
23.2263	-0.323282	T0
23.2342	-0.32339	T0
23.2422	-0.323503	T0
23.2508	-0.323639	T0
23.259	-0.323751	T0
23.2666	-0.323852	T0
23.2744	-0.323973	T0
23.2819	-0.324107	T0
23.2902	-0.32421	T0
23.2982	-0.32433	T0
23.3064	-0.324452	T0
23.3145	-0.324546	T0
23.3228	-0.324644	T0
23.3305	-0.324777	T0
23.3388	-0.324893	T0
23.3469	-0.32501	T0
23.3556	-0.325114	T0
23.3637	-0.325231	T0
23.3714	-0.325354	T0
23.3793	-0.325463	T0
23.3879	-0.325554	T0
23.3957	-0.325595	T0
23.4035	-0.325606	T0
23.4116	-0.325629	T0
23.4197	-0.325669	T0
23.4271	-0.325721	T0
23.4358	-0.325781	T0
23.4436	-0.325836	T0
23.4515	-0.325891	T0
23.4601	-0.325974	T0
23.4681	-0.326056	T0
23.4757	-0.326119	T0
23.4841	-0.326177	T0
23.4924	-0.326257	T0
23.5003	-0.32634	T0
23.5084	-0.326444	T0
23.5165	-0.326547	T0
23.5246	-0.326647	T0
23.5324	-0.326747	T0
23.5408	-0.326858	T0
23.5482	-0.32699	T0
23.5566	-0.327118	T0
23.565	-0.327204	T0
23.573	-0.327264	T0
23.5814	-0.327319	T0
23.5896	-0.327386	T0
23.5977	-0.327461	T0
23.6057	-0.327517	T0
23.6138	-0.327563	T0
23.622	-0.327594	T0
23.63	-0.327638	T0
23.6376	-0.327705	T0
23.6464	-0.327802	T0
23.6542	-0.327919	T0
23.6629	-0.328028	T0
23.6705	-0.328124	T0
23.6789	-0.328215	T0
23.6867	-0.328302	T0
23.6946	-0.328396	T0
23.7028	-0.328458	T0
23.7108	-0.328495	T0
23.7194	-0.328543	T0
23.7272	-0.32859	T0
23.7354	-0.328648	T0
23.7433	-0.328716	T0
23.7514	-0.328786	T0
23.759	-0.328855	T0
23.7674	-0.328923	T0
23.775	-0.328986	T0
23.7839	-0.329047	T0
23.7915	-0.329111	T0
23.7999	-0.329162	T0
23.8087	-0.329205	T0
23.8167	-0.329257	T0
23.825	-0.329321	T0
23.8332	-0.329377	T0
23.8414	-0.329437	T0
23.8488	-0.329522	T0
23.8573	-0.329609	T0
23.8653	-0.32969	T0
23.8734	-0.329751	T0
23.8813	-0.3298	T0
23.8898	-0.32987	T0
23.8977	-0.329934	T0
23.9064	-0.330014	T0
23.9148	-0.330109	T0
23.9228	-0.330183	T0
23.9309	-0.330251	T0
23.9392	-0.330327	T0
23.9472	-0.330404	T0
23.9558	-0.330493	T0
23.9631	-0.330557	T0
23.9706	-0.330592	T0
23.979	-0.330641	T0
23.9873	-0.330697	T0
23.995	-0.330745	T0
24.0039	-0.330791	T0
24.0124	-0.330844	T0
24.0205	-0.330896	T0
24.0286	-0.330962	T0
24.0367	-0.331037	T0
24.0454	-0.331122	T0
24.0529	-0.331203	T0
24.0613	-0.331252	T0
24.0694	-0.331302	T0
24.0776	-0.331347	T0
24.086	-0.331384	T0
24.0938	-0.331435	T0
24.1018	-0.331474	T0
24.1103	-0.331512	T0
24.1184	-0.331553	T0
24.127	-0.331611	T0
24.1353	-0.331681	T0
24.1426	-0.331737	T0
24.151	-0.331792	T0
24.1593	-0.331848	T0
24.1676	-0.331904	T0
24.1756	-0.331962	T0
24.184	-0.33203	T0
24.1922	-0.33208	T0
24.2001	-0.332123	T0
24.2084	-0.332166	T0
24.2168	-0.332201	T0
24.2249	-0.332233	T0
24.2327	-0.332278	T0
24.2416	-0.33233	T0
24.2497	-0.332379	T0
24.2577	-0.332436	T0
24.2658	-0.332502	T0
24.2737	-0.332557	T0
24.2826	-0.332604	T0
24.29	-0.332643	T0
24.2982	-0.332687	T0
24.3065	-0.332723	T0
24.3147	-0.332756	T0
24.3232	-0.332792	T0
24.3317	-0.332835	T0
24.3395	-0.332883	T0
24.3478	-0.332941	T0
24.356	-0.333007	T0
24.365	-0.333076	T0
24.3727	-0.33316	T0
24.3809	-0.333229	T0
24.3891	-0.333302	T0
24.3971	-0.333352	T0
24.4055	-0.333396	T0
24.4134	-0.333429	T0
24.4217	-0.333454	T0
24.4298	-0.333484	T0
24.4379	-0.333504	T0
24.4461	-0.333516	T0
24.4544	-0.333533	T0
24.4629	-0.33356	T0
24.4706	-0.333591	T0
24.4785	-0.333631	T0
24.487	-0.333675	T0
24.4957	-0.333726	T0
24.5038	-0.333777	T0
24.5119	-0.33385	T0
24.5204	-0.333919	T0
24.5283	-0.333989	T0
24.5362	-0.334033	T0
24.5444	-0.334062	T0
24.5526	-0.334099	T0
24.5613	-0.33413	T0
24.5691	-0.334155	T0
24.577	-0.334175	T0
24.5859	-0.334204	T0
24.5937	-0.334247	T0
24.6022	-0.334289	T0
24.6101	-0.334341	T0
24.6185	-0.334391	T0
24.6266	-0.334438	T0
24.6349	-0.334473	T0
24.6428	-0.334509	T0
24.6516	-0.33454	T0
24.66	-0.334569	T0
24.6684	-0.334596	T0
24.6763	-0.334619	T0
24.6849	-0.334639	T0
24.6926	-0.334668	T0
24.7009	-0.334696	T0
24.7095	-0.334722	T0
24.7174	-0.33475	T0
24.7252	-0.334784	T0
24.7334	-0.334825	T0
24.7422	-0.334863	T0
24.7501	-0.334901	T0
24.7579	-0.334939	T0
24.7658	-0.334973	T0
24.7747	-0.334995	T0
24.7827	-0.335022	T0
24.791	-0.335048	T0
24.7999	-0.335071	T0
24.808	-0.335092	T0
24.8164	-0.335123	T0
24.8239	-0.335156	T0
24.8325	-0.335184	T0
24.8414	-0.335208	T0
24.8489	-0.335241	T0
24.8572	-0.335273	T0
24.8653	-0.3353	T0
24.8732	-0.335326	T0
24.8814	-0.335352	T0
24.8895	-0.335387	T0
24.8978	-0.335422	T0
24.9069	-0.335461	T0
24.9145	-0.335502	T0
24.9234	-0.335528	T0
24.9318	-0.335549	T0
24.9394	-0.335573	T0
24.9479	-0.335595	T0
24.9564	-0.335618	T0
24.964	-0.33564	T0
24.9728	-0.335669	T0
24.9812	-0.335705	T0
24.9887	-0.335749	T0
24.9973	-0.335791	T0
25.0056	-0.335826	T0
25.0141	-0.335858	T0
25.0221	-0.335884	T0
25.0304	-0.335904	T0
25.0384	-0.335925	T0
25.047	-0.335956	T0
25.0554	-0.335984	T0
25.0634	-0.336011	T0
25.0716	-0.336033	T0
25.0797	-0.336049	T0
25.0881	-0.336064	T0
25.0965	-0.336078	T0
25.1048	-0.336092	T0
25.113	-0.336105	T0
25.1209	-0.336124	T0
25.1297	-0.336143	T0
25.1372	-0.33616	T0
25.1458	-0.336186	T0
25.1542	-0.336213	T0
25.1622	-0.336238	T0
25.1705	-0.336261	T0
25.1792	-0.336288	T0
25.187	-0.336313	T0
25.1954	-0.336349	T0
25.2036	-0.336374	T0
25.2118	-0.336401	T0
25.2203	-0.336424	T0
25.2284	-0.336447	T0
25.2369	-0.336471	T0
25.2452	-0.336492	T0
25.2531	-0.336508	T0
25.2613	-0.336529	T0
25.2699	-0.336554	T0
25.2781	-0.33658	T0
25.2863	-0.336609	T0
25.2949	-0.336644	T0
25.3026	-0.336683	T0
25.3111	-0.336711	T0
25.3198	-0.336739	T0
25.3278	-0.336766	T0
25.3355	-0.336788	T0
25.3439	-0.336804	T0
25.3525	-0.33682	T0
25.3604	-0.336836	T0
25.3689	-0.336853	T0
25.3768	-0.336867	T0
25.3852	-0.336879	T0
25.3941	-0.336892	T0
25.4018	-0.336907	T0
25.4106	-0.336918	T0
25.4187	-0.336926	T0
25.4267	-0.336938	T0
25.4351	-0.336946	T0
25.4431	-0.336957	T0
25.4516	-0.336969	T0
25.4597	-0.336982	T0
25.4678	-0.336994	T0
25.4763	-0.337006	T0
25.4849	-0.337021	T0
25.4931	-0.337037	T0
25.5011	-0.337067	T0
25.5094	-0.337091	T0
25.5171	-0.337115	T0
25.5257	-0.337138	T0
25.5345	-0.337161	T0
25.5421	-0.337181	T0
25.5512	-0.337203	T0
25.5591	-0.337231	T0
25.568	-0.337257	T0
25.5759	-0.337277	T0
25.5843	-0.337295	T0
25.5921	-0.33732	T0
25.6005	-0.337351	T0
25.6088	-0.337385	T0
25.6174	-0.337416	T0
25.6254	-0.337445	T0
25.6337	-0.33746	T0
25.642	-0.337474	T0
25.6504	-0.337484	T0
25.6589	-0.337493	T0
25.6674	-0.337501	T0
25.6751	-0.337508	T0
25.6832	-0.337515	T0
25.6913	-0.337522	T0
25.6999	-0.337534	T0
25.708	-0.337547	T0
25.7163	-0.337565	T0
25.7249	-0.337584	T0
25.7331	-0.3376	T0
25.7409	-0.33762	T0
25.7497	-0.33764	T0
25.7578	-0.33766	T0
25.7659	-0.337687	T0
25.7742	-0.337707	T0
25.7825	-0.337722	T0
25.7906	-0.337735	T0
25.7987	-0.337748	T0
25.8074	-0.337763	T0
25.8159	-0.337778	T0
25.8245	-0.337792	T0
25.8326	-0.337806	T0
25.8406	-0.33782	T0
25.8485	-0.337835	T0
25.8572	-0.337848	T0
25.8657	-0.337861	T0
25.8738	-0.337878	T0
25.8815	-0.337893	T0
25.8897	-0.337909	T0
25.8985	-0.337924	T0
25.9065	-0.337934	T0
25.915	-0.337946	T0
25.9237	-0.337958	T0
25.9319	-0.337967	T0
25.9399	-0.337975	T0
25.9479	-0.337985	T0
25.9568	-0.337998	T0
25.9651	-0.338017	T0
25.9734	-0.338033	T0
25.981	-0.338047	T0
25.9897	-0.338067	T0
25.998	-0.338087	T0
26.0064	-0.338109	T0
26.0146	-0.338127	T0
26.023	-0.338143	T0
26.031	-0.338158	T0
26.0399	-0.338177	T0
26.0477	-0.338192	T0
26.056	-0.338204	T0
26.0642	-0.338212	T0
26.0727	-0.338218	T0
26.0808	-0.338227	T0
26.0893	-0.338236	T0
26.0979	-0.338244	T0
26.1056	-0.338249	T0
26.1145	-0.338256	T0
26.1228	-0.338266	T0
26.1308	-0.338279	T0
26.1393	-0.338295	T0
26.1469	-0.338313	T0
26.1557	-0.338333	T0
26.1638	-0.338363	T0
26.1718	-0.338389	T0
26.1803	-0.338412	T0
26.1886	-0.338432	T0
26.1969	-0.338442	T0
26.2054	-0.33845	T0
26.2138	-0.338459	T0
26.2224	-0.338465	T0
26.23	-0.338472	T0
26.2391	-0.338482	T0
26.2474	-0.338489	T0
26.2553	-0.3385	T0
26.2633	-0.338513	T0
26.2722	-0.338525	T0
26.2802	-0.338535	T0
26.2887	-0.338548	T0
26.2973	-0.338564	T0
26.3051	-0.338577	T0
26.3131	-0.338588	T0
26.3216	-0.338597	T0
26.3299	-0.338608	T0
26.3382	-0.338618	T0
26.3462	-0.338626	T0
26.355	-0.338635	T0
26.363	-0.338645	T0
26.3711	-0.338654	T0
26.3799	-0.338661	T0
26.388	-0.33867	T0
26.3962	-0.338682	T0
26.4043	-0.338691	T0
26.4131	-0.338701	T0
26.4212	-0.338713	T0
26.4293	-0.33873	T0
26.4378	-0.338752	T0
26.4462	-0.338779	T0
26.4545	-0.338812	T0
26.4633	-0.338854	T0
26.4712	-0.338884	T0
26.4787	-0.338902	T0
26.4877	-0.338914	T0
26.4961	-0.338922	T0
26.5043	-0.338931	T0
26.512	-0.338937	T0
26.5203	-0.338945	T0
26.5291	-0.338951	T0
26.5373	-0.338961	T0
26.5453	-0.338974	T0
26.5538	-0.338994	T0
26.5625	-0.339016	T0
26.5706	-0.339036	T0
26.5787	-0.339053	T0
26.5871	-0.339073	T0
26.5949	-0.339082	T0
26.6033	-0.339089	T0
26.6117	-0.339095	T0
26.6204	-0.339102	T0
26.6286	-0.339108	T0
26.6375	-0.339114	T0
26.6455	-0.339123	T0
26.6537	-0.339131	T0
26.6618	-0.339139	T0
26.6702	-0.339146	T0
26.6785	-0.339153	T0
26.687	-0.33916	T0
26.6953	-0.339172	T0
26.7029	-0.33919	T0
26.7116	-0.339206	T0
26.7203	-0.339227	T0
26.7285	-0.339246	T0
26.7364	-0.339263	T0
26.7448	-0.339276	T0
26.753	-0.339291	T0
26.7611	-0.339302	T0
26.7699	-0.339314	T0
26.7781	-0.339322	T0
26.7869	-0.33933	T0
26.7949	-0.339336	T0
26.8031	-0.339344	T0
26.812	-0.339358	T0
26.8202	-0.339374	T0
26.828	-0.339386	T0
26.8365	-0.339394	T0
26.8448	-0.339401	T0
26.853	-0.339407	T0
26.861	-0.339416	T0
26.8695	-0.339423	T0
26.8777	-0.33943	T0
26.8865	-0.339439	T0
26.8944	-0.339446	T0
26.9029	-0.339453	T0
26.9112	-0.33946	T0
26.9197	-0.339467	T0
26.9282	-0.339473	T0
26.9361	-0.339479	T0
26.9448	-0.339486	T0
26.9529	-0.339492	T0
26.9611	-0.339501	T0
26.9695	-0.339509	T0
26.9771	-0.339516	T0
26.9857	-0.339523	T0
26.9944	-0.33953	T0
27.0028	-0.339537	T0
27.0117	-0.339544	T0
27.0197	-0.339551	T0
27.0274	-0.33956	T0
27.0361	-0.339569	T0
27.0438	-0.339579	T0
27.0525	-0.33959	T0
27.0607	-0.339602	T0
27.0691	-0.339613	T0
27.0775	-0.339623	T0
27.0856	-0.339632	T0
27.094	-0.339642	T0
27.1026	-0.339652	T0
27.1109	-0.339662	T0
27.1193	-0.33967	T0
27.1276	-0.339678	T0
27.1359	-0.339685	T0
27.1443	-0.339695	T0
27.152	-0.339706	T0
27.1607	-0.339714	T0
27.1694	-0.339722	T0
27.1771	-0.339731	T0
27.1862	-0.339741	T0
27.1942	-0.339752	T0
27.2022	-0.33976	T0
27.2109	-0.339766	T0
27.2187	-0.339772	T0
27.2274	-0.339778	T0
27.2359	-0.339785	T0
27.2435	-0.339793	T0
27.2524	-0.339806	T0
27.2604	-0.339826	T0
27.2694	-0.339843	T0
27.2774	-0.339855	T0
27.2853	-0.339865	T0
27.2942	-0.339874	T0
27.3023	-0.339882	T0
27.3108	-0.339889	T0
27.319	-0.339896	T0
27.3268	-0.339902	T0
27.3356	-0.339908	T0
27.3438	-0.339915	T0
27.3521	-0.339921	T0
27.3602	-0.339928	T0
27.369	-0.339935	T0
27.3774	-0.339941	T0
27.3852	-0.339947	T0
27.3937	-0.339954	T0
27.4022	-0.339961	T0
27.4103	-0.339969	T0
27.4184	-0.339977	T0
27.4271	-0.339985	T0
27.4351	-0.339995	T0
27.4432	-0.340005	T0
27.4514	-0.340012	T0
27.4606	-0.340019	T0
27.4684	-0.340026	T0
27.477	-0.340033	T0
27.485	-0.340039	T0
27.4935	-0.340047	T0
27.5022	-0.340054	T0
27.5102	-0.340061	T0
27.5184	-0.34007	T0
27.5267	-0.340078	T0
27.5351	-0.340086	T0
27.5434	-0.340093	T0
27.5514	-0.3401	T0
27.5597	-0.340106	T0
27.5687	-0.340112	T0
27.5765	-0.340118	T0
27.585	-0.340125	T0
27.5932	-0.340131	T0
27.6019	-0.340138	T0
27.6103	-0.340144	T0
27.6187	-0.34015	T0
27.6271	-0.340157	T0
27.635	-0.340165	T0
27.6433	-0.340176	T0
27.6516	-0.340184	T0
27.6603	-0.340192	T0
27.6681	-0.340199	T0
27.6768	-0.340208	T0
27.6849	-0.340215	T0
27.6929	-0.340222	T0
27.7014	-0.340228	T0
27.7097	-0.340234	T0
27.718	-0.340241	T0
27.7264	-0.340248	T0
27.7345	-0.340256	T0
27.7436	-0.340262	T0
27.7517	-0.340269	T0
27.7602	-0.340275	T0
27.7683	-0.340282	T0
27.7767	-0.340289	T0
27.785	-0.340295	T0
27.7929	-0.3403	T0
27.8016	-0.340305	T0
27.8095	-0.340309	T0
27.8179	-0.340314	T0
27.8256	-0.34032	T0
27.8347	-0.340325	T0
27.8424	-0.340331	T0
27.8515	-0.340343	T0
27.8601	-0.340365	T0
27.8689	-0.340387	T0
27.8771	-0.340409	T0
27.8849	-0.340427	T0
27.8934	-0.340441	T0
27.9012	-0.340453	T0
27.9099	-0.340464	T0
27.918	-0.340469	T0
27.9267	-0.340474	T0
27.9349	-0.340479	T0
27.942	-0.340484	T0
27.951	-0.340489	T0
27.9589	-0.340494	T0
27.9675	-0.340499	T0
27.976	-0.340505	T0
27.9845	-0.340512	T0
27.9925	-0.340519	T0
28.0012	-0.340526	T0
28.01	-0.340535	T0
28.0179	-0.340541	T0
28.0269	-0.340546	T0
28.0351	-0.340553	T0
28.043	-0.34056	T0
28.0513	-0.340567	T0
28.0593	-0.340573	T0
28.0677	-0.34058	T0
28.076	-0.340586	T0
28.0845	-0.340591	T0
28.0928	-0.340597	T0
28.1013	-0.340602	T0
28.1097	-0.340608	T0
28.1178	-0.340613	T0
28.1262	-0.340618	T0
28.1343	-0.340624	T0
28.1431	-0.34063	T0
28.1511	-0.340635	T0
28.1592	-0.340641	T0
28.168	-0.340647	T0
28.1762	-0.340653	T0
28.1843	-0.340658	T0
28.1924	-0.340664	T0
28.2012	-0.34067	T0
28.2095	-0.340675	T0
28.2178	-0.340681	T0
28.2261	-0.340686	T0
28.2344	-0.340691	T0
28.2427	-0.340696	T0
28.251	-0.3407	T0
28.2594	-0.340704	T0
28.2675	-0.340709	T0
28.2757	-0.340713	T0
28.284	-0.340718	T0
28.2924	-0.340722	T0
28.3005	-0.340727	T0
28.3089	-0.340731	T0
28.3179	-0.340736	T0
28.3263	-0.340741	T0
28.3346	-0.340746	T0
28.3425	-0.340752	T0
28.3511	-0.340758	T0
28.3593	-0.340765	T0
28.3675	-0.340772	T0
28.3759	-0.340777	T0
28.3842	-0.340785	T0
28.3922	-0.340794	T0
28.401	-0.340802	T0
28.4093	-0.340812	T0
28.4177	-0.340822	T0
28.4269	-0.340836	T0
28.4347	-0.340844	T0
28.4429	-0.340851	T0
28.4514	-0.340857	T0
28.4598	-0.340861	T0
28.4676	-0.340865	T0
28.4765	-0.340868	T0
28.4844	-0.340872	T0
28.4923	-0.340875	T0
28.5011	-0.340879	T0
28.5087	-0.340883	T0
28.5174	-0.340888	T0
28.5262	-0.340892	T0
28.5341	-0.340898	T0
28.542	-0.340903	T0
28.5509	-0.340909	T0
28.5588	-0.340914	T0
28.567	-0.34092	T0
28.5756	-0.340926	T0
28.5847	-0.340931	T0
28.5929	-0.340935	T0
28.6015	-0.340939	T0
28.6094	-0.340945	T0
28.618	-0.34095	T0
28.6259	-0.340955	T0
28.6343	-0.34096	T0
28.6425	-0.340966	T0
28.651	-0.340971	T0
28.6595	-0.340976	T0
28.6671	-0.340982	T0
28.6759	-0.340987	T0
28.6843	-0.340992	T0
28.6924	-0.340996	T0
28.7008	-0.341001	T0
28.7091	-0.341005	T0
28.7181	-0.34101	T0
28.7268	-0.341016	T0
28.7348	-0.341021	T0
28.7425	-0.341028	T0
28.7513	-0.341036	T0
28.7594	-0.341043	T0
28.7679	-0.34105	T0
28.7757	-0.341055	T0
28.7845	-0.341059	T0
28.793	-0.341063	T0
28.8003	-0.341067	T0
28.8089	-0.341071	T0
28.8177	-0.341074	T0
28.8265	-0.341077	T0
28.8337	-0.341081	T0
28.8427	-0.341086	T0
28.8511	-0.34109	T0
28.8594	-0.341095	T0
28.8679	-0.3411	T0
28.8757	-0.341105	T0
28.8841	-0.34111	T0
28.8925	-0.341115	T0
28.9016	-0.34112	T0
28.9096	-0.341124	T0
28.9181	-0.341128	T0
28.926	-0.341133	T0
28.9352	-0.34114	T0
28.9426	-0.341145	T0
28.9507	-0.34115	T0
28.9592	-0.341156	T0
28.9679	-0.34116	T0
28.9757	-0.341164	T0
28.9844	-0.341168	T0
28.9926	-0.341173	T0
29.0008	-0.341177	T0
29.0094	-0.341181	T0
29.0173	-0.341184	T0
29.0266	-0.341188	T0
29.0346	-0.341192	T0
29.0429	-0.341196	T0
29.0512	-0.3412	T0
29.0593	-0.341204	T0
29.0676	-0.341207	T0
29.076	-0.341211	T0
29.0845	-0.341215	T0
29.0925	-0.34122	T0
29.101	-0.341226	T0
29.1087	-0.341231	T0
29.1176	-0.341236	T0
29.1259	-0.341239	T0
29.1349	-0.341243	T0
29.1423	-0.341246	T0
29.1508	-0.341249	T0
29.1592	-0.341252	T0
29.1676	-0.341254	T0
29.1762	-0.341258	T0
29.1842	-0.34126	T0
29.1929	-0.341264	T0
29.2015	-0.341267	T0
29.2093	-0.34127	T0
29.2174	-0.341274	T0
29.2261	-0.341277	T0
29.2341	-0.341281	T0
29.2426	-0.341284	T0
29.2509	-0.341287	T0
29.2594	-0.341291	T0
29.2674	-0.341294	T0
29.2756	-0.341297	T0
29.2839	-0.341301	T0
29.2927	-0.341304	T0
29.3012	-0.341307	T0
29.3099	-0.341311	T0
29.3174	-0.341313	T0
29.326	-0.341317	T0
29.3342	-0.34132	T0
29.3419	-0.341323	T0
29.3504	-0.341327	T0
29.3589	-0.34133	T0
29.3675	-0.341334	T0
29.376	-0.341338	T0
29.3846	-0.341341	T0
29.393	-0.341344	T0
29.4016	-0.341348	T0
29.41	-0.341353	T0
29.4175	-0.341358	T0
29.4261	-0.341366	T0
29.434	-0.341371	T0
29.4425	-0.341377	T0
29.4512	-0.341382	T0
29.4594	-0.341386	T0
29.4681	-0.34139	T0
29.4758	-0.341393	T0
29.4847	-0.341396	T0
29.4929	-0.341399	T0
29.5016	-0.341402	T0
29.5096	-0.341406	T0
29.5179	-0.341411	T0
29.5265	-0.341417	T0
29.5345	-0.341424	T0
29.5425	-0.341428	T0
29.5515	-0.341432	T0
29.559	-0.341436	T0
29.5672	-0.34144	T0
29.5761	-0.341444	T0
29.5845	-0.341448	T0
29.5927	-0.341452	T0
29.6011	-0.341456	T0
29.6097	-0.341461	T0
29.618	-0.341466	T0
29.6259	-0.34147	T0
29.6349	-0.341473	T0
29.6425	-0.341476	T0
29.651	-0.341479	T0
29.6598	-0.341481	T0
29.6681	-0.341484	T0
29.6765	-0.341488	T0
29.6846	-0.34149	T0
29.6924	-0.341493	T0
29.7014	-0.341496	T0
29.7097	-0.3415	T0
29.7178	-0.341503	T0
29.7262	-0.341507	T0
29.7344	-0.341511	T0
29.7429	-0.341515	T0
29.7509	-0.34152	T0
29.7593	-0.341524	T0
29.7677	-0.341528	T0
29.7763	-0.341532	T0
29.785	-0.341535	T0
29.7933	-0.341537	T0
29.801	-0.341538	T0
29.8098	-0.341539	T0
29.8176	-0.341541	T0
29.8255	-0.341543	T0
29.8347	-0.341546	T0
29.8433	-0.34155	T0
29.8518	-0.341554	T0
29.8596	-0.341559	T0
29.8683	-0.341565	T0
29.8768	-0.341569	T0
29.885	-0.341573	T0
29.8934	-0.341576	T0
29.9014	-0.341579	T0
29.9097	-0.341582	T0
29.9182	-0.341584	T0
29.9265	-0.341585	T0
29.9346	-0.341587	T0
29.943	-0.34159	T0
29.9515	-0.341593	T0
29.9594	-0.341596	T0
29.9681	-0.341599	T0
29.9767	-0.341602	T0
29.9854	-0.341605	T0
29.9925	-0.341609	T0
30.0021	-0.341612	T0
30.0096	-0.341617	T0
30.0179	-0.341621	T0
30.0268	-0.341625	T0
30.0348	-0.341628	T0
30.043	-0.341631	T0
30.0516	-0.341634	T0
30.0598	-0.341637	T0
30.068	-0.34164	T0
30.0768	-0.341643	T0
30.0851	-0.341646	T0
30.093	-0.341648	T0
30.1013	-0.341651	T0
30.1104	-0.341654	T0
30.118	-0.341658	T0
30.1272	-0.341661	T0
30.1348	-0.341665	T0
30.143	-0.341669	T0
30.1518	-0.341673	T0
30.1594	-0.341677	T0
30.168	-0.341682	T0
30.1764	-0.341686	T0
30.1848	-0.34169	T0
30.1926	-0.341693	T0
30.2013	-0.341695	T0
30.2097	-0.341697	T0
30.2183	-0.341698	T0
30.2266	-0.3417	T0
30.2352	-0.341701	T0
30.2433	-0.341703	T0
30.2519	-0.341705	T0
30.2605	-0.341707	T0
30.2686	-0.34171	T0
30.2769	-0.341712	T0
30.2854	-0.341714	T0
30.2926	-0.341716	T0
30.3016	-0.341718	T0
30.3096	-0.34172	T0
30.3179	-0.341723	T0
30.3262	-0.341724	T0
30.3353	-0.341727	T0
30.3435	-0.34173	T0
30.3515	-0.341733	T0
30.3596	-0.341735	T0
30.3681	-0.341737	T0
30.3771	-0.341739	T0
30.3844	-0.341741	T0
30.3935	-0.341742	T0
30.4019	-0.341743	T0
30.4102	-0.341745	T0
30.4185	-0.341746	T0
30.4272	-0.341747	T0
30.4352	-0.341749	T0
30.4434	-0.341752	T0
30.4514	-0.341755	T0
30.4601	-0.341758	T0
30.4684	-0.341763	T0
30.4766	-0.341766	T0
30.4851	-0.341769	T0
30.4935	-0.341771	T0
30.5021	-0.341772	T0
30.5098	-0.341772	T0
30.5186	-0.34177	T0
30.5265	-0.341768	T0
30.5354	-0.341767	T0
30.5435	-0.341766	T0
30.5517	-0.341767	T0
30.5603	-0.34177	T0
30.5683	-0.341773	T0
30.5768	-0.341777	T0
30.5849	-0.341782	T0
30.5935	-0.341783	T0
30.602	-0.341785	T0
30.6104	-0.341785	T0
30.6184	-0.341785	T0
30.627	-0.341785	T0
30.6354	-0.341785	T0
30.6437	-0.341785	T0
30.6519	-0.341787	T0
30.6597	-0.34179	T0
30.6686	-0.341793	T0
30.6763	-0.341795	T0
30.6849	-0.341797	T0
30.6933	-0.3418	T0
30.7016	-0.341802	T0
30.7097	-0.341803	T0
30.7184	-0.341804	T0
30.7269	-0.341805	T0
30.7353	-0.341805	T0
30.744	-0.341806	T0
30.7523	-0.341807	T0
30.7602	-0.341808	T0
30.769	-0.341809	T0
30.7771	-0.34181	T0
30.7852	-0.341811	T0
30.7936	-0.341813	T0
30.8017	-0.341814	T0
30.8103	-0.341816	T0
30.8182	-0.341818	T0
30.8265	-0.34182	T0
30.8353	-0.341822	T0
30.8433	-0.341824	T0
30.8519	-0.341825	T0
30.8605	-0.341826	T0
30.8686	-0.341828	T0
30.8764	-0.34183	T0
30.8854	-0.341832	T0
30.8935	-0.341834	T0
30.9024	-0.341835	T0
30.9105	-0.341837	T0
30.9192	-0.341839	T0
30.9271	-0.34184	T0
30.9355	-0.341841	T0
30.9436	-0.341841	T0
30.9521	-0.341842	T0
30.9603	-0.341843	T0
30.9687	-0.341844	T0
30.9768	-0.341845	T0
30.9852	-0.341847	T0
30.994	-0.341849	T0
31.002	-0.341852	T0
31.0105	-0.341854	T0
31.0184	-0.341856	T0
31.0273	-0.341857	T0
31.0354	-0.341858	T0
31.0434	-0.341859	T0
31.0525	-0.34186	T0
31.0604	-0.341862	T0
31.0683	-0.341864	T0
31.077	-0.341867	T0
31.0855	-0.34187	T0
31.0938	-0.341873	T0
31.1028	-0.341876	T0
31.1107	-0.341879	T0
31.1185	-0.34188	T0
31.127	-0.341881	T0
31.1355	-0.341882	T0
31.1437	-0.341884	T0
31.152	-0.341885	T0
31.1608	-0.341886	T0
31.1687	-0.341888	T0
31.1775	-0.34189	T0
31.1851	-0.341891	T0
31.194	-0.341893	T0
31.2027	-0.341894	T0
31.211	-0.341895	T0
31.2191	-0.341897	T0
31.2273	-0.341899	T0
31.2362	-0.341901	T0
31.2445	-0.341903	T0
31.2527	-0.341905	T0
31.2609	-0.341908	T0
31.2695	-0.341909	T0
31.2781	-0.341911	T0
31.2861	-0.341913	T0
31.2941	-0.341914	T0
31.3026	-0.341915	T0
31.3113	-0.341916	T0
31.3193	-0.341916	T0
31.3275	-0.341916	T0
31.3356	-0.341917	T0
31.3446	-0.341918	T0
31.3526	-0.34192	T0
31.3612	-0.341921	T0
31.3699	-0.341922	T0
31.3783	-0.341924	T0
31.3865	-0.341926	T0
31.3946	-0.341928	T0
31.4031	-0.34193	T0
31.4116	-0.341932	T0
31.4199	-0.341934	T0
31.4278	-0.341936	T0
31.4361	-0.341939	T0
31.4447	-0.341942	T0
31.4529	-0.341943	T0
31.4615	-0.341945	T0
31.4697	-0.341946	T0
31.4785	-0.341948	T0
31.486	-0.341948	T0
31.4946	-0.341948	T0
31.5025	-0.341949	T0
31.511	-0.34195	T0
31.5195	-0.341951	T0
31.5277	-0.341952	T0
31.5357	-0.341954	T0
31.5443	-0.341955	T0
31.5531	-0.341955	T0
31.5616	-0.341956	T0
31.5694	-0.341958	T0
31.578	-0.341958	T0
31.5865	-0.341959	T0
31.5947	-0.34196	T0
31.6029	-0.341961	T0
31.6115	-0.341962	T0
31.6195	-0.341963	T0
31.6283	-0.341964	T0
31.6368	-0.341964	T0
31.6446	-0.341965	T0
31.6532	-0.341966	T0
31.6618	-0.341967	T0
31.6702	-0.341969	T0
31.6785	-0.34197	T0
31.6868	-0.341971	T0
31.695	-0.341973	T0
31.7031	-0.341975	T0
31.7114	-0.341978	T0
31.7202	-0.341979	T0
31.7286	-0.341981	T0
31.7363	-0.341981	T0
31.7449	-0.341981	T0
31.7531	-0.341983	T0
31.762	-0.341984	T0
31.7698	-0.341985	T0
31.7782	-0.341986	T0
31.786	-0.341988	T0
31.7945	-0.34199	T0
31.8032	-0.341993	T0
31.8117	-0.341994	T0
31.8196	-0.341994	T0
31.8283	-0.341995	T0
31.8365	-0.341996	T0
31.8447	-0.341997	T0
31.8533	-0.341998	T0
31.8618	-0.341998	T0
31.8704	-0.341999	T0
31.8779	-0.342	T0
31.8863	-0.342	T0
31.8943	-0.342001	T0
31.9033	-0.342002	T0
31.9114	-0.342003	T0
31.9197	-0.342003	T0
31.9281	-0.342003	T0
31.9365	-0.342003	T0
31.945	-0.342004	T0
31.9532	-0.342005	T0
31.9613	-0.342006	T0
31.9696	-0.342007	T0
31.9792	-0.342007	T0
31.9868	-0.342008	T0
31.9947	-0.342008	T0
32.0033	-0.342009	T0
32.011	-0.34201	T0
32.0202	-0.342011	T0
32.0281	-0.342013	T0
32.0372	-0.342017	T0
32.0451	-0.34202	T0
32.0537	-0.342023	T0
32.0619	-0.342026	T0
32.0702	-0.342028	T0
32.0784	-0.34203	T0
32.0867	-0.342031	T0
32.0953	-0.342031	T0
32.1028	-0.342033	T0
32.1116	-0.342035	T0
32.1201	-0.342036	T0
32.1285	-0.342038	T0
32.1365	-0.342038	T0
32.1449	-0.342038	T0
32.1534	-0.34204	T0
32.1614	-0.34204	T0
32.1696	-0.342041	T0
32.178	-0.342042	T0
32.1863	-0.342044	T0
32.1949	-0.342046	T0
32.2038	-0.342048	T0
32.2116	-0.342049	T0
32.2199	-0.34205	T0
32.2283	-0.342051	T0
32.2366	-0.342051	T0
32.2448	-0.34205	T0
32.2538	-0.342049	T0
32.2624	-0.342048	T0
32.2705	-0.342048	T0
32.2781	-0.342047	T0
32.2871	-0.342046	T0
32.295	-0.342045	T0
32.3031	-0.342043	T0
32.3117	-0.342041	T0
32.3199	-0.342044	T0
32.3283	-0.342048	T0
32.337	-0.34205	T0
32.3452	-0.342052	T0
32.3535	-0.342054	T0
32.3618	-0.342056	T0
32.3696	-0.342058	T0
32.3779	-0.342059	T0
32.3865	-0.342059	T0
32.3948	-0.342059	T0
32.4037	-0.342059	T0
32.4115	-0.342059	T0
32.4202	-0.34206	T0
32.4284	-0.34206	T0
32.4366	-0.34206	T0
32.4455	-0.34206	T0
32.4539	-0.34206	T0
32.4621	-0.342061	T0
32.4702	-0.34206	T0
32.4786	-0.34206	T0
32.4873	-0.342061	T0
32.4952	-0.342061	T0
32.5042	-0.342061	T0
32.5118	-0.342061	T0
32.5202	-0.342062	T0
32.5285	-0.342062	T0
32.5371	-0.342062	T0
32.5449	-0.342064	T0
32.5533	-0.342064	T0
32.5622	-0.342064	T0
32.5705	-0.342065	T0
32.5792	-0.342066	T0
32.5871	-0.342068	T0
32.595	-0.342069	T0
32.6037	-0.34207	T0
32.6116	-0.342072	T0
32.62	-0.342074	T0
32.629	-0.342075	T0
32.637	-0.342077	T0
32.6455	-0.34208	T0
32.6542	-0.342082	T0
32.6627	-0.342083	T0
32.671	-0.342084	T0
32.6789	-0.342086	T0
32.6873	-0.342087	T0
32.6952	-0.342088	T0
32.704	-0.342089	T0
32.712	-0.34209	T0
32.721	-0.34209	T0
32.7285	-0.34209	T0
32.7374	-0.342092	T0
32.746	-0.342093	T0
32.7539	-0.342093	T0
32.7619	-0.342093	T0
32.7702	-0.342094	T0
32.7797	-0.342095	T0
32.7878	-0.342096	T0
32.7954	-0.342097	T0
32.8041	-0.342098	T0
32.8124	-0.342098	T0
32.8206	-0.342098	T0
32.8293	-0.3421	T0
32.8376	-0.342101	T0
32.846	-0.342103	T0
32.8545	-0.342105	T0
32.8623	-0.342107	T0
32.8703	-0.342109	T0
32.8787	-0.342111	T0
32.8875	-0.342111	T0
32.8959	-0.342112	T0
32.9039	-0.342112	T0
32.912	-0.342112	T0
32.9203	-0.342112	T0
32.929	-0.342113	T0
32.9374	-0.342114	T0
32.9457	-0.342116	T0
32.9542	-0.342119	T0
32.9625	-0.342121	T0
32.971	-0.342122	T0
32.9794	-0.342124	T0
32.9871	-0.342125	T0
32.9959	-0.342126	T0
33.0044	-0.342127	T0
33.0126	-0.342128	T0
33.0215	-0.342128	T0
33.0295	-0.342128	T0
33.0376	-0.342129	T0
33.0462	-0.342129	T0
33.0545	-0.342129	T0
33.0623	-0.342129	T0
33.071	-0.34213	T0
33.0795	-0.34213	T0
33.0873	-0.34213	T0
33.0962	-0.342131	T0
33.105	-0.342132	T0
33.1127	-0.342133	T0
33.1211	-0.342135	T0
33.13	-0.342138	T0
33.1381	-0.342141	T0
33.1464	-0.342145	T0
33.1547	-0.342147	T0
33.1632	-0.34215	T0
33.1708	-0.342151	T0
33.18	-0.342152	T0
33.1881	-0.342153	T0
33.1963	-0.342153	T0
33.205	-0.342153	T0
33.213	-0.342153	T0
33.2218	-0.342153	T0
33.2292	-0.342154	T0
33.2378	-0.342154	T0
33.2467	-0.342155	T0
33.2546	-0.342156	T0
33.2629	-0.342158	T0
33.2715	-0.342161	T0
33.2796	-0.342163	T0
33.2882	-0.342166	T0
33.2961	-0.342168	T0
33.3052	-0.34217	T0
33.3133	-0.342172	T0
33.3218	-0.342174	T0
33.3299	-0.342176	T0
33.3382	-0.342177	T0
33.347	-0.342178	T0
33.3548	-0.342179	T0
33.3637	-0.342179	T0
33.3712	-0.34218	T0
33.3798	-0.342181	T0
33.3883	-0.342182	T0
33.3964	-0.342183	T0
33.405	-0.342184	T0
33.4134	-0.342185	T0
33.4215	-0.342186	T0
33.4302	-0.342186	T0
33.4383	-0.342187	T0
33.4464	-0.342186	T0
33.455	-0.342185	T0
33.4632	-0.342184	T0
33.4714	-0.342184	T0
33.4795	-0.342181	T0
33.488	-0.342179	T0
33.4967	-0.342178	T0
33.5054	-0.342179	T0
33.5135	-0.342181	T0
33.5219	-0.342183	T0
33.5301	-0.342185	T0
33.5382	-0.342188	T0
33.5459	-0.342191	T0
33.5552	-0.342193	T0
33.5631	-0.342195	T0
33.5716	-0.342196	T0
33.5797	-0.342196	T0
33.5885	-0.342196	T0
33.5965	-0.342196	T0
33.605	-0.342196	T0
33.6137	-0.342195	T0
33.6215	-0.342195	T0
33.6296	-0.342195	T0
33.6382	-0.342195	T0
33.6466	-0.342195	T0
33.6548	-0.342195	T0
33.6636	-0.342195	T0
33.6715	-0.342195	T0
33.68	-0.342194	T0
33.6888	-0.342195	T0
33.6973	-0.342195	T0
33.7055	-0.342194	T0
33.7138	-0.342195	T0
33.7223	-0.342196	T0
33.7301	-0.342197	T0
33.7385	-0.342198	T0
33.7468	-0.342198	T0
33.755	-0.342199	T0
33.763	-0.3422	T0
33.7711	-0.3422	T0
33.7799	-0.3422	T0
33.7885	-0.342201	T0
33.7969	-0.342202	T0
33.8052	-0.342202	T0
33.8131	-0.342203	T0
33.8212	-0.342204	T0
33.83	-0.342205	T0
33.8383	-0.342206	T0
33.8469	-0.342206	T0
33.8556	-0.342206	T0
33.8641	-0.342206	T0
33.8719	-0.342206	T0
33.8803	-0.342207	T0
33.8881	-0.342207	T0
33.897	-0.342208	T0
33.9049	-0.342209	T0
33.9133	-0.34221	T0
33.9221	-0.34221	T0
33.9301	-0.34221	T0
33.9381	-0.342209	T0
33.947	-0.342208	T0
33.9548	-0.342206	T0
33.9631	-0.342204	T0
33.9721	-0.342202	T0
33.9807	-0.342201	T0
33.9882	-0.3422	T0
33.9968	-0.342199	T0
34.0049	-0.342199	T0
34.0135	-0.342198	T0
34.0217	-0.342198	T0
34.0308	-0.342199	T0
34.0387	-0.342199	T0
34.0472	-0.342198	T0
34.0551	-0.342198	T0
34.0635	-0.342198	T0
34.0717	-0.342198	T0
34.0799	-0.342199	T0
34.0887	-0.342199	T0
34.0971	-0.3422	T0
34.1059	-0.3422	T0
34.1139	-0.3422	T0
34.1223	-0.3422	T0
34.1295	-0.342199	T0
34.1389	-0.342199	T0
34.1466	-0.342199	T0
34.1552	-0.342199	T0
34.1635	-0.3422	T0
34.1714	-0.342201	T0
34.1807	-0.342201	T0
34.1884	-0.342202	T0
34.1973	-0.342202	T0
34.205	-0.342202	T0
34.2136	-0.342201	T0
34.2216	-0.3422	T0
34.2297	-0.342199	T0
34.2384	-0.342198	T0
34.2471	-0.342196	T0
34.2558	-0.342196	T0
34.2636	-0.342197	T0
34.2722	-0.342197	T0
34.2803	-0.342198	T0
34.2884	-0.342199	T0
34.297	-0.3422	T0
34.306	-0.342201	T0
34.314	-0.342201	T0
34.3226	-0.342201	T0
34.3307	-0.342202	T0
34.3392	-0.342201	T0
34.3475	-0.342201	T0
34.3562	-0.342201	T0
34.3644	-0.342201	T0
34.3723	-0.3422	T0
34.3803	-0.3422	T0
34.3889	-0.342199	T0
34.3976	-0.342199	T0
34.406	-0.342198	T0
34.4142	-0.342198	T0
34.4223	-0.342198	T0
34.4302	-0.342199	T0
34.439	-0.342199	T0
34.4472	-0.342199	T0
34.4555	-0.342198	T0
34.464	-0.342197	T0
34.4719	-0.342196	T0
34.4804	-0.342195	T0
34.4889	-0.342194	T0
34.4975	-0.342194	T0
34.5061	-0.342193	T0
34.5146	-0.342193	T0
34.5221	-0.342194	T0
34.5305	-0.342195	T0
34.5389	-0.342195	T0
34.5471	-0.342196	T0
34.5558	-0.342196	T0
34.5638	-0.342196	T0
34.5721	-0.342197	T0
34.5808	-0.342197	T0
34.5889	-0.342197	T0
34.598	-0.342197	T0
34.6061	-0.342197	T0
34.6147	-0.342197	T0
34.6221	-0.342197	T0
34.631	-0.342197	T0
34.6394	-0.342196	T0
34.648	-0.342196	T0
34.656	-0.342195	T0
34.6639	-0.342195	T0
34.6728	-0.342194	T0
34.6811	-0.342193	T0
34.689	-0.342192	T0
34.6981	-0.342192	T0
34.7062	-0.342192	T0
34.7144	-0.342192	T0
34.7225	-0.342191	T0
34.7311	-0.342191	T0
34.7396	-0.342191	T0
34.7468	-0.34219	T0
34.756	-0.34219	T0
34.7635	-0.34219	T0
34.7724	-0.342191	T0
34.7808	-0.342192	T0
34.7888	-0.342193	T0
34.7978	-0.342193	T0
34.8061	-0.342194	T0
34.8148	-0.342194	T0
34.8227	-0.342194	T0
34.831	-0.342193	T0
34.8391	-0.342193	T0
34.8477	-0.342191	T0
34.856	-0.342191	T0
34.8643	-0.342191	T0
34.8729	-0.342191	T0
34.8816	-0.342191	T0
34.8903	-0.342192	T0
34.8975	-0.342193	T0
34.9067	-0.342193	T0
34.9148	-0.342194	T0
34.9226	-0.342194	T0
34.9315	-0.342194	T0
34.9398	-0.342194	T0
34.9475	-0.342193	T0
34.956	-0.342192	T0
34.9646	-0.34219	T0
34.9729	-0.342189	T0
34.9813	-0.342189	T0
34.9898	-0.342189	T0
34.9979	-0.342188	T0
35.0066	-0.342188	T0
35.0148	-0.342188	T0
35.0233	-0.342188	T0
35.0314	-0.342188	T0
35.0399	-0.342188	T0
35.0489	-0.342188	T0
35.0561	-0.342189	T0
35.0648	-0.342192	T0
35.0728	-0.342193	T0
35.0814	-0.342195	T0
35.0897	-0.342195	T0
35.0984	-0.342195	T0
35.1066	-0.342196	T0
35.1154	-0.342195	T0
35.1231	-0.342195	T0
35.1315	-0.342195	T0
35.1404	-0.342195	T0
35.1484	-0.342195	T0
35.1568	-0.342196	T0
35.1648	-0.342197	T0
35.173	-0.342198	T0
35.1813	-0.342199	T0
35.1904	-0.342199	T0
35.1987	-0.3422	T0
35.2068	-0.3422	T0
35.2147	-0.3422	T0
35.2232	-0.342201	T0
35.2315	-0.342201	T0
35.2403	-0.342201	T0
35.2482	-0.342201	T0
[truncated: 21,830 more rows]

## Sheet: AvLEA1C_Sucrose
Temperature	Heat Flow (Normalized)	Sample
20.0202	-0.0154276	S0
20.0197	-0.0154279	S0
20.0201	-0.015428	S0
20.0199	-0.0154281	S0
20.0198	-0.0154282	S0
20.0194	-0.0154284	S0
20.0199	-0.0154284	S0
20.02	-0.0154285	S0
20.02	-0.0154285	S0
20.0205	-0.0154286	S0
20.02	-0.0154287	S0
20.0201	-0.0154291	S0
20.0204	-0.0154296	S0
20.0201	-0.01543	S0
20.0205	-0.0154306	S0
20.0201	-0.0154312	S0
20.0204	-0.0154318	S0
20.0209	-0.015432	S0
20.021	-0.0154323	S0
20.0212	-0.0154325	S0
20.0213	-0.0154328	S0
20.0215	-0.0154328	S0
20.0216	-0.0154328	S0
20.022	-0.0154333	S0
20.0218	-0.0154338	S0
20.0226	-0.0154347	S0
20.0228	-0.0154356	S0
20.023	-0.015437	S0
20.0235	-0.0154408	S0
20.0234	-0.015448	S0
20.0246	-0.0154577	S0
20.025	-0.0154697	S0
20.0256	-0.0154857	S0
20.0253	-0.0155167	S0
20.0263	-0.0155595	S0
20.0267	-0.0156172	S0
20.0268	-0.0156938	S0
20.0279	-0.0158114	S0
20.0288	-0.0159594	S0
20.0297	-0.0161411	S0
20.03	-0.0163723	S0
20.031	-0.0166178	S0
20.031	-0.0168545	S0
20.0321	-0.0170929	S0
20.0329	-0.0173894	S0
20.0335	-0.0176559	S0
20.0351	-0.0179232	S0
20.0362	-0.018229	S0
20.0377	-0.0185668	S0
20.0387	-0.0188573	S0
20.0398	-0.0191424	S0
20.0416	-0.0194914	S0
20.0426	-0.0197953	S0
20.0434	-0.0201562	S0
20.045	-0.0205361	S0
20.0463	-0.020962	S0
20.0473	-0.0213518	S0
20.0488	-0.0217598	S0
20.0507	-0.0222228	S0
20.0521	-0.0226602	S0
20.0544	-0.0231346	S0
20.0558	-0.0236625	S0
20.0573	-0.0241869	S0
20.0598	-0.0247573	S0
20.0612	-0.0253235	S0
20.0636	-0.0259307	S0
20.0653	-0.0265552	S0
20.0677	-0.0272254	S0
20.069	-0.0278742	S0
20.0711	-0.0285828	S0
20.0737	-0.0293318	S0
20.0763	-0.0299812	S0
20.0787	-0.0306735	S0
20.081	-0.0314839	S0
20.084	-0.0322817	S0
20.086	-0.0331482	S0
20.0879	-0.0340355	S0
20.0904	-0.0349265	S0
20.0932	-0.0359194	S0
20.0954	-0.0369568	S0
20.0981	-0.0380175	S0
20.1007	-0.0391476	S0
20.104	-0.0402995	S0
20.1065	-0.0414401	S0
20.1098	-0.0425932	S0
20.1125	-0.0437225	S0
20.115	-0.044902	S0
20.1187	-0.04607	S0
20.1215	-0.0472164	S0
20.1244	-0.04846	S0
20.1273	-0.0497117	S0
20.1306	-0.0508824	S0
20.134	-0.0521294	S0
20.1377	-0.053417	S0
20.1411	-0.0547161	S0
20.1442	-0.0559462	S0
20.1476	-0.0572304	S0
20.151	-0.0585486	S0
20.1547	-0.0599078	S0
20.1583	-0.0612913	S0
20.161	-0.0626262	S0
20.1652	-0.0639918	S0
20.1685	-0.0653895	S0
20.1721	-0.0667684	S0
20.1762	-0.0681957	S0
20.1797	-0.0696211	S0
20.1836	-0.0710625	S0
20.1879	-0.0724852	S0
20.1911	-0.0739919	S0
20.1955	-0.0754485	S0
20.1996	-0.0768895	S0
20.2033	-0.0783611	S0
20.2075	-0.0798082	S0
20.2117	-0.0813006	S0
20.2158	-0.0827839	S0
20.2198	-0.0842318	S0
20.2239	-0.0856837	S0
20.2282	-0.0871968	S0
20.232	-0.0887048	S0
20.2358	-0.0901879	S0
20.2406	-0.0916292	S0
20.2453	-0.093123	S0
20.2491	-0.0946379	S0
20.2538	-0.0961271	S0
20.2581	-0.0975953	S0
20.2622	-0.0990605	S0
20.2669	-0.100422	S0
20.2715	-0.101856	S0
20.2759	-0.10332	S0
20.2802	-0.104831	S0
20.2852	-0.106281	S0
20.2897	-0.107703	S0
20.294	-0.109175	S0
20.2986	-0.110672	S0
20.304	-0.112135	S0
20.309	-0.113659	S0
20.3125	-0.115112	S0
20.3175	-0.116513	S0
20.3222	-0.117853	S0
20.3269	-0.11915	S0
20.3319	-0.120525	S0
20.3361	-0.121933	S0
20.3403	-0.123315	S0
20.3456	-0.1247	S0
20.3511	-0.126098	S0
20.3564	-0.127514	S0
20.3615	-0.128944	S0
20.3663	-0.130327	S0
20.3715	-0.131723	S0
20.3764	-0.133081	S0
20.3811	-0.134413	S0
20.3866	-0.135705	S0
20.3909	-0.137086	S0
20.3959	-0.138398	S0
20.4013	-0.139686	S0
20.4063	-0.140908	S0
20.411	-0.14218	S0
20.4166	-0.143445	S0
20.4215	-0.144701	S0
20.4269	-0.145926	S0
20.4322	-0.147223	S0
20.4378	-0.148484	S0
20.4427	-0.14972	S0
20.4481	-0.150988	S0
20.4535	-0.152276	S0
20.4589	-0.153467	S0
20.4643	-0.154676	S0
20.4696	-0.155893	S0
20.4752	-0.157169	S0
20.4806	-0.158364	S0
20.4858	-0.159504	S0
20.4906	-0.160679	S0
20.4967	-0.161847	S0
20.5023	-0.162928	S0
20.5071	-0.164086	S0
20.5129	-0.165242	S0
20.5191	-0.166298	S0
20.5244	-0.167442	S0
20.5299	-0.168589	S0
20.5352	-0.169746	S0
20.5412	-0.170901	S0
20.5469	-0.172014	S0
20.5526	-0.173102	S0
20.5577	-0.174171	S0
20.5636	-0.175186	S0
20.569	-0.176283	S0
20.5751	-0.177318	S0
20.5808	-0.17828	S0
20.587	-0.179372	S0
20.5922	-0.18046	S0
20.598	-0.181502	S0
20.6038	-0.182501	S0
20.6094	-0.183535	S0
20.6159	-0.184532	S0
20.6215	-0.185555	S0
20.6273	-0.186519	S0
20.6328	-0.187485	S0
20.639	-0.188526	S0
20.6448	-0.189502	S0
20.6511	-0.190487	S0
20.6566	-0.191483	S0
20.6622	-0.192411	S0
20.6685	-0.19334	S0
20.6745	-0.194303	S0
20.6802	-0.195192	S0
20.686	-0.196125	S0
20.6924	-0.19705	S0
20.6985	-0.197975	S0
20.7048	-0.19889	S0
20.7105	-0.199811	S0
20.7164	-0.200696	S0
20.7225	-0.201607	S0
20.7283	-0.202511	S0
20.7345	-0.203377	S0
20.7413	-0.204262	S0
20.7473	-0.205081	S0
20.7536	-0.205935	S0
20.7598	-0.206824	S0
20.766	-0.207657	S0
20.7716	-0.208555	S0
20.778	-0.209352	S0
20.7841	-0.210197	S0
20.7901	-0.211071	S0
20.7965	-0.211882	S0
20.8029	-0.212786	S0
20.8092	-0.213613	S0
20.8157	-0.214458	S0
20.8222	-0.215272	S0
20.8278	-0.21603	S0
20.8342	-0.216733	S0
20.841	-0.217525	S0
20.8473	-0.21826	S0
20.8537	-0.219007	S0
20.8597	-0.219803	S0
20.8662	-0.220488	S0
20.8725	-0.221266	S0
20.879	-0.22202	S0
20.8855	-0.222843	S0
20.8917	-0.223678	S0
20.8988	-0.224405	S0
20.9053	-0.225124	S0
20.9117	-0.225895	S0
20.9181	-0.226568	S0
20.9247	-0.227332	S0
20.931	-0.228048	S0
20.9375	-0.228734	S0
20.9439	-0.2295	S0
20.9505	-0.230149	S0
20.9573	-0.230853	S0
20.9632	-0.231571	S0
20.9702	-0.232258	S0
20.9766	-0.232912	S0
20.9836	-0.233561	S0
20.9896	-0.234199	S0
20.9962	-0.234942	S0
21.0029	-0.235591	S0
21.0096	-0.236279	S0
21.0161	-0.237008	S0
21.0231	-0.237532	S0
21.03	-0.238078	S0
21.0361	-0.238789	S0
21.043	-0.239505	S0
21.0501	-0.240186	S0
21.0568	-0.240814	S0
21.0638	-0.241411	S0
21.0704	-0.242107	S0
21.0772	-0.242768	S0
21.0839	-0.243388	S0
21.0903	-0.243931	S0
21.0976	-0.244484	S0
21.1038	-0.245072	S0
21.1107	-0.245681	S0
21.1175	-0.246271	S0
21.1238	-0.246906	S0
21.1311	-0.247527	S0
21.1381	-0.248115	S0
21.1448	-0.248695	S0
21.1518	-0.249302	S0
21.1584	-0.249875	S0
21.1659	-0.250465	S0
21.1725	-0.250967	S0
21.1788	-0.251544	S0
21.1857	-0.252147	S0
21.1929	-0.252737	S0
21.1994	-0.253243	S0
21.2061	-0.253769	S0
21.2139	-0.254363	S0
21.2204	-0.25491	S0
21.2277	-0.255441	S0
21.2348	-0.256028	S0
21.2419	-0.256579	S0
21.2488	-0.257095	S0
21.2545	-0.257552	S0
21.2623	-0.258074	S0
21.2689	-0.258609	S0
21.2765	-0.259118	S0
21.2831	-0.259609	S0
21.2905	-0.260161	S0
21.2976	-0.260709	S0
21.3045	-0.261181	S0
21.312	-0.261667	S0
21.3185	-0.262085	S0
21.3261	-0.262574	S0
21.3325	-0.263085	S0
21.3395	-0.263586	S0
21.3465	-0.264092	S0
21.3539	-0.264565	S0
21.3606	-0.265054	S0
21.3682	-0.265571	S0
21.3756	-0.266078	S0
21.382	-0.26652	S0
21.389	-0.266928	S0
21.3965	-0.267267	S0
21.4036	-0.2676	S0
21.4106	-0.268033	S0
21.4174	-0.268556	S0
21.4253	-0.269063	S0
21.4322	-0.269584	S0
21.4395	-0.270028	S0
21.447	-0.270459	S0
21.4541	-0.270877	S0
21.4612	-0.271387	S0
21.4684	-0.271829	S0
21.4754	-0.272215	S0
21.4832	-0.272536	S0
21.4899	-0.272991	S0
21.4969	-0.273441	S0
21.5044	-0.273899	S0
21.5122	-0.274317	S0
21.5192	-0.274772	S0
21.5258	-0.27514	S0
21.5331	-0.275507	S0
21.5405	-0.27593	S0
21.5471	-0.276383	S0
21.5548	-0.276764	S0
21.5621	-0.277105	S0
21.5691	-0.277534	S0
21.5764	-0.277943	S0
21.5838	-0.278328	S0
21.5921	-0.278715	S0
21.5984	-0.279106	S0
21.6061	-0.279417	S0
21.6137	-0.279857	S0
21.6205	-0.280216	S0
21.6282	-0.280627	S0
21.6356	-0.280935	S0
21.6428	-0.281325	S0
21.6496	-0.28166	S0
21.6571	-0.28204	S0
21.665	-0.28237	S0
21.6724	-0.282731	S0
21.6799	-0.28304	S0
21.6867	-0.283376	S0
21.6941	-0.283728	S0
21.7012	-0.284093	S0
21.7095	-0.284457	S0
21.7168	-0.284787	S0
21.7242	-0.285197	S0
21.7316	-0.285513	S0
21.7388	-0.285876	S0
21.7467	-0.286246	S0
21.7537	-0.286585	S0
21.7613	-0.286965	S0
21.7687	-0.287285	S0
21.7764	-0.287639	S0
21.7841	-0.287949	S0
21.7912	-0.288302	S0
21.799	-0.288562	S0
21.8057	-0.288857	S0
21.8134	-0.289111	S0
21.8206	-0.289343	S0
21.8285	-0.289588	S0
21.8358	-0.289919	S0
21.8438	-0.290263	S0
21.851	-0.290605	S0
21.8581	-0.290956	S0
21.8656	-0.291333	S0
21.8733	-0.291662	S0
21.8805	-0.291947	S0
21.8879	-0.292265	S0
21.8957	-0.292617	S0
21.9032	-0.29279	S0
21.9109	-0.293065	S0
21.9184	-0.293355	S0
21.9258	-0.293615	S0
21.9338	-0.293919	S0
21.9416	-0.294334	S0
21.949	-0.294621	S0
21.9565	-0.294923	S0
21.9643	-0.295196	S0
21.9717	-0.295445	S0
21.9795	-0.295777	S0
21.9863	-0.296011	S0
21.9937	-0.296206	S0
22.0019	-0.296409	S0
22.0092	-0.296551	S0
22.0175	-0.296766	S0
22.0245	-0.297039	S0
22.0321	-0.297258	S0
22.0398	-0.297576	S0
22.0471	-0.29792	S0
22.0552	-0.298231	S0
22.0625	-0.298576	S0
22.0705	-0.298876	S0
22.0778	-0.299205	S0
22.085	-0.299499	S0
22.0933	-0.299727	S0
22.1012	-0.299951	S0
22.1089	-0.300105	S0
22.1165	-0.300297	S0
22.124	-0.300523	S0
22.1319	-0.300739	S0
22.1398	-0.301026	S0
22.1468	-0.30124	S0
22.1546	-0.301459	S0
22.1625	-0.301769	S0
22.1695	-0.302048	S0
22.1775	-0.302243	S0
22.1851	-0.302525	S0
22.1927	-0.302728	S0
22.201	-0.302994	S0
22.2083	-0.303215	S0
22.2164	-0.303421	S0
22.2242	-0.303628	S0
22.2315	-0.303817	S0
22.2395	-0.303995	S0
22.2472	-0.304238	S0
22.2551	-0.304429	S0
22.2629	-0.304608	S0
22.2707	-0.304883	S0
22.2783	-0.305137	S0
22.2857	-0.305361	S0
22.2934	-0.305599	S0
22.3013	-0.305822	S0
22.3086	-0.30604	S0
22.3171	-0.306225	S0
22.3246	-0.306415	S0
22.3326	-0.306637	S0
22.3402	-0.306872	S0
22.3476	-0.307088	S0
22.3556	-0.307327	S0
22.3636	-0.307598	S0
22.3716	-0.307768	S0
22.3786	-0.307982	S0
22.3864	-0.308132	S0
22.3943	-0.308296	S0
22.402	-0.308419	S0
22.4104	-0.308567	S0
22.4179	-0.308737	S0
22.4253	-0.308943	S0
22.4329	-0.309196	S0
22.4414	-0.309345	S0
22.4486	-0.309668	S0
22.4566	-0.309911	S0
22.4646	-0.310096	S0
22.472	-0.310285	S0
22.4795	-0.310422	S0
22.4874	-0.310634	S0
22.4956	-0.310768	S0
22.5034	-0.310906	S0
22.5118	-0.311023	S0
22.5194	-0.311257	S0
22.5273	-0.311434	S0
22.535	-0.311611	S0
22.5432	-0.311851	S0
22.5509	-0.312094	S0
22.5588	-0.312264	S0
22.5665	-0.312386	S0
22.5742	-0.312589	S0
22.5822	-0.312714	S0
22.5901	-0.312839	S0
22.5985	-0.312936	S0
22.6058	-0.313099	S0
22.6143	-0.313269	S0
22.622	-0.313431	S0
22.6298	-0.313674	S0
22.6373	-0.313943	S0
22.6455	-0.314091	S0
22.6527	-0.314271	S0
22.6605	-0.314444	S0
22.6686	-0.314583	S0
22.6765	-0.314721	S0
22.6844	-0.3148	S0
22.6922	-0.314957	S0
22.7008	-0.315112	S0
22.7085	-0.315234	S0
22.716	-0.315402	S0
22.7241	-0.315561	S0
22.7326	-0.315679	S0
22.7406	-0.315819	S0
22.7475	-0.315935	S0
22.7558	-0.316124	S0
22.7638	-0.316314	S0
22.7714	-0.316428	S0
22.7796	-0.316609	S0
22.7873	-0.316823	S0
22.7953	-0.316996	S0
22.8035	-0.317068	S0
22.8111	-0.317141	S0
22.8193	-0.317242	S0
22.8277	-0.31738	S0
22.8355	-0.317439	S0
22.843	-0.317582	S0
22.8511	-0.31779	S0
22.8583	-0.318	S0
22.8667	-0.318157	S0
22.8749	-0.318318	S0
22.8824	-0.318484	S0
22.8909	-0.318552	S0
22.8989	-0.318663	S0
22.9067	-0.318805	S0
22.9147	-0.318947	S0
22.9221	-0.319023	S0
22.9301	-0.319141	S0
22.9386	-0.319347	S0
22.9465	-0.319562	S0
22.9546	-0.31976	S0
22.9622	-0.319942	S0
22.9703	-0.320071	S0
22.9779	-0.320156	S0
22.9866	-0.320276	S0
22.9941	-0.320441	S0
23.0021	-0.320513	S0
23.0101	-0.320616	S0
23.0178	-0.320651	S0
23.0258	-0.320737	S0
23.0341	-0.320812	S0
23.0424	-0.320927	S0
23.0502	-0.321006	S0
23.058	-0.32105	S0
23.066	-0.321127	S0
23.0741	-0.321199	S0
23.0824	-0.32129	S0
23.0903	-0.321403	S0
23.0983	-0.321548	S0
23.1064	-0.321728	S0
23.1141	-0.321932	S0
23.122	-0.322128	S0
23.1298	-0.322297	S0
23.1386	-0.322435	S0
23.1462	-0.32253	S0
23.1545	-0.322632	S0
23.1625	-0.32271	S0
23.1702	-0.322749	S0
23.1784	-0.322834	S0
23.1868	-0.322891	S0
23.1946	-0.322937	S0
23.2025	-0.32299	S0
23.2107	-0.323042	S0
23.2178	-0.323157	S0
23.2263	-0.323282	S0
23.2342	-0.32339	S0
23.2422	-0.323503	S0
23.2508	-0.323639	S0
23.259	-0.323751	S0
23.2666	-0.323852	S0
23.2744	-0.323973	S0
23.2819	-0.324107	S0
23.2902	-0.32421	S0
23.2982	-0.32433	S0
23.3064	-0.324452	S0
23.3145	-0.324546	S0
23.3228	-0.324644	S0
23.3305	-0.324777	S0
23.3388	-0.324893	S0
23.3469	-0.32501	S0
23.3556	-0.325114	S0
23.3637	-0.325231	S0
23.3714	-0.325354	S0
23.3793	-0.325463	S0
23.3879	-0.325554	S0
23.3957	-0.325595	S0
23.4035	-0.325606	S0
23.4116	-0.325629	S0
23.4197	-0.325669	S0
23.4271	-0.325721	S0
23.4358	-0.325781	S0
23.4436	-0.325836	S0
23.4515	-0.325891	S0
23.4601	-0.325974	S0
23.4681	-0.326056	S0
23.4757	-0.326119	S0
23.4841	-0.326177	S0
23.4924	-0.326257	S0
23.5003	-0.32634	S0
23.5084	-0.326444	S0
23.5165	-0.326547	S0
23.5246	-0.326647	S0
23.5324	-0.326747	S0
23.5408	-0.326858	S0
23.5482	-0.32699	S0
23.5566	-0.327118	S0
23.565	-0.327204	S0
23.573	-0.327264	S0
23.5814	-0.327319	S0
23.5896	-0.327386	S0
23.5977	-0.327461	S0
23.6057	-0.327517	S0
23.6138	-0.327563	S0
23.622	-0.327594	S0
23.63	-0.327638	S0
23.6376	-0.327705	S0
23.6464	-0.327802	S0
23.6542	-0.327919	S0
23.6629	-0.328028	S0
23.6705	-0.328124	S0
23.6789	-0.328215	S0
23.6867	-0.328302	S0
23.6946	-0.328396	S0
23.7028	-0.328458	S0
23.7108	-0.328495	S0
23.7194	-0.328543	S0
23.7272	-0.32859	S0
23.7354	-0.328648	S0
23.7433	-0.328716	S0
23.7514	-0.328786	S0
23.759	-0.328855	S0
23.7674	-0.328923	S0
23.775	-0.328986	S0
23.7839	-0.329047	S0
23.7915	-0.329111	S0
23.7999	-0.329162	S0
23.8087	-0.329205	S0
23.8167	-0.329257	S0
23.825	-0.329321	S0
23.8332	-0.329377	S0
23.8414	-0.329437	S0
23.8488	-0.329522	S0
23.8573	-0.329609	S0
23.8653	-0.32969	S0
23.8734	-0.329751	S0
23.8813	-0.3298	S0
23.8898	-0.32987	S0
23.8977	-0.329934	S0
23.9064	-0.330014	S0
23.9148	-0.330109	S0
23.9228	-0.330183	S0
23.9309	-0.330251	S0
23.9392	-0.330327	S0
23.9472	-0.330404	S0
23.9558	-0.330493	S0
23.9631	-0.330557	S0
23.9706	-0.330592	S0
23.979	-0.330641	S0
23.9873	-0.330697	S0
23.995	-0.330745	S0
24.0039	-0.330791	S0
24.0124	-0.330844	S0
24.0205	-0.330896	S0
24.0286	-0.330962	S0
24.0367	-0.331037	S0
24.0454	-0.331122	S0
24.0529	-0.331203	S0
24.0613	-0.331252	S0
24.0694	-0.331302	S0
24.0776	-0.331347	S0
24.086	-0.331384	S0
24.0938	-0.331435	S0
24.1018	-0.331474	S0
24.1103	-0.331512	S0
24.1184	-0.331553	S0
24.127	-0.331611	S0
24.1353	-0.331681	S0
24.1426	-0.331737	S0
24.151	-0.331792	S0
24.1593	-0.331848	S0
24.1676	-0.331904	S0
24.1756	-0.331962	S0
24.184	-0.33203	S0
24.1922	-0.33208	S0
24.2001	-0.332123	S0
24.2084	-0.332166	S0
24.2168	-0.332201	S0
24.2249	-0.332233	S0
24.2327	-0.332278	S0
24.2416	-0.33233	S0
24.2497	-0.332379	S0
24.2577	-0.332436	S0
24.2658	-0.332502	S0
24.2737	-0.332557	S0
24.2826	-0.332604	S0
24.29	-0.332643	S0
24.2982	-0.332687	S0
24.3065	-0.332723	S0
24.3147	-0.332756	S0
24.3232	-0.332792	S0
24.3317	-0.332835	S0
24.3395	-0.332883	S0
24.3478	-0.332941	S0
24.356	-0.333007	S0
24.365	-0.333076	S0
24.3727	-0.33316	S0
24.3809	-0.333229	S0
24.3891	-0.333302	S0
24.3971	-0.333352	S0
24.4055	-0.333396	S0
24.4134	-0.333429	S0
24.4217	-0.333454	S0
24.4298	-0.333484	S0
24.4379	-0.333504	S0
24.4461	-0.333516	S0
24.4544	-0.333533	S0
24.4629	-0.33356	S0
24.4706	-0.333591	S0
24.4785	-0.333631	S0
24.487	-0.333675	S0
24.4957	-0.333726	S0
24.5038	-0.333777	S0
24.5119	-0.33385	S0
24.5204	-0.333919	S0
24.5283	-0.333989	S0
24.5362	-0.334033	S0
24.5444	-0.334062	S0
24.5526	-0.334099	S0
24.5613	-0.33413	S0
24.5691	-0.334155	S0
24.577	-0.334175	S0
24.5859	-0.334204	S0
24.5937	-0.334247	S0
24.6022	-0.334289	S0
24.6101	-0.334341	S0
24.6185	-0.334391	S0
24.6266	-0.334438	S0
24.6349	-0.334473	S0
24.6428	-0.334509	S0
24.6516	-0.33454	S0
24.66	-0.334569	S0
24.6684	-0.334596	S0
24.6763	-0.334619	S0
24.6849	-0.334639	S0
24.6926	-0.334668	S0
24.7009	-0.334696	S0
24.7095	-0.334722	S0
24.7174	-0.33475	S0
24.7252	-0.334784	S0
24.7334	-0.334825	S0
24.7422	-0.334863	S0
24.7501	-0.334901	S0
24.7579	-0.334939	S0
24.7658	-0.334973	S0
24.7747	-0.334995	S0
24.7827	-0.335022	S0
24.791	-0.335048	S0
24.7999	-0.335071	S0
24.808	-0.335092	S0
24.8164	-0.335123	S0
24.8239	-0.335156	S0
24.8325	-0.335184	S0
24.8414	-0.335208	S0
24.8489	-0.335241	S0
24.8572	-0.335273	S0
24.8653	-0.3353	S0
24.8732	-0.335326	S0
24.8814	-0.335352	S0
24.8895	-0.335387	S0
24.8978	-0.335422	S0
24.9069	-0.335461	S0
24.9145	-0.335502	S0
24.9234	-0.335528	S0
24.9318	-0.335549	S0
24.9394	-0.335573	S0
24.9479	-0.335595	S0
24.9564	-0.335618	S0
24.964	-0.33564	S0
24.9728	-0.335669	S0
24.9812	-0.335705	S0
24.9887	-0.335749	S0
24.9973	-0.335791	S0
25.0056	-0.335826	S0
25.0141	-0.335858	S0
25.0221	-0.335884	S0
25.0304	-0.335904	S0
25.0384	-0.335925	S0
25.047	-0.335956	S0
25.0554	-0.335984	S0
25.0634	-0.336011	S0
25.0716	-0.336033	S0
25.0797	-0.336049	S0
25.0881	-0.336064	S0
25.0965	-0.336078	S0
25.1048	-0.336092	S0
25.113	-0.336105	S0
25.1209	-0.336124	S0
25.1297	-0.336143	S0
25.1372	-0.33616	S0
25.1458	-0.336186	S0
25.1542	-0.336213	S0
25.1622	-0.336238	S0
25.1705	-0.336261	S0
25.1792	-0.336288	S0
25.187	-0.336313	S0
25.1954	-0.336349	S0
25.2036	-0.336374	S0
25.2118	-0.336401	S0
25.2203	-0.336424	S0
25.2284	-0.336447	S0
25.2369	-0.336471	S0
25.2452	-0.336492	S0
25.2531	-0.336508	S0
25.2613	-0.336529	S0
25.2699	-0.336554	S0
25.2781	-0.33658	S0
25.2863	-0.336609	S0
25.2949	-0.336644	S0
25.3026	-0.336683	S0
25.3111	-0.336711	S0
25.3198	-0.336739	S0
25.3278	-0.336766	S0
25.3355	-0.336788	S0
25.3439	-0.336804	S0
25.3525	-0.33682	S0
25.3604	-0.336836	S0
25.3689	-0.336853	S0
25.3768	-0.336867	S0
25.3852	-0.336879	S0
25.3941	-0.336892	S0
25.4018	-0.336907	S0
25.4106	-0.336918	S0
25.4187	-0.336926	S0
25.4267	-0.336938	S0
25.4351	-0.336946	S0
25.4431	-0.336957	S0
25.4516	-0.336969	S0
25.4597	-0.336982	S0
25.4678	-0.336994	S0
25.4763	-0.337006	S0
25.4849	-0.337021	S0
25.4931	-0.337037	S0
25.5011	-0.337067	S0
25.5094	-0.337091	S0
25.5171	-0.337115	S0
25.5257	-0.337138	S0
25.5345	-0.337161	S0
25.5421	-0.337181	S0
25.5512	-0.337203	S0
25.5591	-0.337231	S0
25.568	-0.337257	S0
25.5759	-0.337277	S0
25.5843	-0.337295	S0
25.5921	-0.33732	S0
25.6005	-0.337351	S0
25.6088	-0.337385	S0
25.6174	-0.337416	S0
25.6254	-0.337445	S0
25.6337	-0.33746	S0
25.642	-0.337474	S0
25.6504	-0.337484	S0
25.6589	-0.337493	S0
25.6674	-0.337501	S0
25.6751	-0.337508	S0
25.6832	-0.337515	S0
25.6913	-0.337522	S0
25.6999	-0.337534	S0
25.708	-0.337547	S0
25.7163	-0.337565	S0
25.7249	-0.337584	S0
25.7331	-0.3376	S0
25.7409	-0.33762	S0
25.7497	-0.33764	S0
25.7578	-0.33766	S0
25.7659	-0.337687	S0
25.7742	-0.337707	S0
25.7825	-0.337722	S0
25.7906	-0.337735	S0
25.7987	-0.337748	S0
25.8074	-0.337763	S0
25.8159	-0.337778	S0
25.8245	-0.337792	S0
25.8326	-0.337806	S0
25.8406	-0.33782	S0
25.8485	-0.337835	S0
25.8572	-0.337848	S0
25.8657	-0.337861	S0
25.8738	-0.337878	S0
25.8815	-0.337893	S0
25.8897	-0.337909	S0
25.8985	-0.337924	S0
25.9065	-0.337934	S0
25.915	-0.337946	S0
25.9237	-0.337958	S0
25.9319	-0.337967	S0
25.9399	-0.337975	S0
25.9479	-0.337985	S0
25.9568	-0.337998	S0
25.9651	-0.338017	S0
25.9734	-0.338033	S0
25.981	-0.338047	S0
25.9897	-0.338067	S0
25.998	-0.338087	S0
26.0064	-0.338109	S0
26.0146	-0.338127	S0
26.023	-0.338143	S0
26.031	-0.338158	S0
26.0399	-0.338177	S0
26.0477	-0.338192	S0
26.056	-0.338204	S0
26.0642	-0.338212	S0
26.0727	-0.338218	S0
26.0808	-0.338227	S0
26.0893	-0.338236	S0
26.0979	-0.338244	S0
26.1056	-0.338249	S0
26.1145	-0.338256	S0
26.1228	-0.338266	S0
26.1308	-0.338279	S0
26.1393	-0.338295	S0
26.1469	-0.338313	S0
26.1557	-0.338333	S0
26.1638	-0.338363	S0
26.1718	-0.338389	S0
26.1803	-0.338412	S0
26.1886	-0.338432	S0
26.1969	-0.338442	S0
26.2054	-0.33845	S0
26.2138	-0.338459	S0
26.2224	-0.338465	S0
26.23	-0.338472	S0
26.2391	-0.338482	S0
26.2474	-0.338489	S0
26.2553	-0.3385	S0
26.2633	-0.338513	S0
26.2722	-0.338525	S0
26.2802	-0.338535	S0
26.2887	-0.338548	S0
26.2973	-0.338564	S0
26.3051	-0.338577	S0
26.3131	-0.338588	S0
26.3216	-0.338597	S0
26.3299	-0.338608	S0
26.3382	-0.338618	S0
26.3462	-0.338626	S0
26.355	-0.338635	S0
26.363	-0.338645	S0
26.3711	-0.338654	S0
26.3799	-0.338661	S0
26.388	-0.33867	S0
26.3962	-0.338682	S0
26.4043	-0.338691	S0
26.4131	-0.338701	S0
26.4212	-0.338713	S0
26.4293	-0.33873	S0
26.4378	-0.338752	S0
26.4462	-0.338779	S0
26.4545	-0.338812	S0
26.4633	-0.338854	S0
26.4712	-0.338884	S0
26.4787	-0.338902	S0
26.4877	-0.338914	S0
26.4961	-0.338922	S0
26.5043	-0.338931	S0
26.512	-0.338937	S0
26.5203	-0.338945	S0
26.5291	-0.338951	S0
26.5373	-0.338961	S0
26.5453	-0.338974	S0
26.5538	-0.338994	S0
26.5625	-0.339016	S0
26.5706	-0.339036	S0
26.5787	-0.339053	S0
26.5871	-0.339073	S0
26.5949	-0.339082	S0
26.6033	-0.339089	S0
26.6117	-0.339095	S0
26.6204	-0.339102	S0
26.6286	-0.339108	S0
26.6375	-0.339114	S0
26.6455	-0.339123	S0
26.6537	-0.339131	S0
26.6618	-0.339139	S0
26.6702	-0.339146	S0
26.6785	-0.339153	S0
26.687	-0.33916	S0
26.6953	-0.339172	S0
26.7029	-0.33919	S0
26.7116	-0.339206	S0
26.7203	-0.339227	S0
26.7285	-0.339246	S0
26.7364	-0.339263	S0
26.7448	-0.339276	S0
26.753	-0.339291	S0
26.7611	-0.339302	S0
26.7699	-0.339314	S0
26.7781	-0.339322	S0
26.7869	-0.33933	S0
26.7949	-0.339336	S0
26.8031	-0.339344	S0
26.812	-0.339358	S0
26.8202	-0.339374	S0
26.828	-0.339386	S0
26.8365	-0.339394	S0
26.8448	-0.339401	S0
26.853	-0.339407	S0
26.861	-0.339416	S0
26.8695	-0.339423	S0
26.8777	-0.33943	S0
26.8865	-0.339439	S0
26.8944	-0.339446	S0
26.9029	-0.339453	S0
26.9112	-0.33946	S0
26.9197	-0.339467	S0
26.9282	-0.339473	S0
26.9361	-0.339479	S0
26.9448	-0.339486	S0
26.9529	-0.339492	S0
26.9611	-0.339501	S0
26.9695	-0.339509	S0
26.9771	-0.339516	S0
26.9857	-0.339523	S0
26.9944	-0.33953	S0
27.0028	-0.339537	S0
27.0117	-0.339544	S0
27.0197	-0.339551	S0
27.0274	-0.33956	S0
27.0361	-0.339569	S0
27.0438	-0.339579	S0
27.0525	-0.33959	S0
27.0607	-0.339602	S0
27.0691	-0.339613	S0
27.0775	-0.339623	S0
27.0856	-0.339632	S0
27.094	-0.339642	S0
27.1026	-0.339652	S0
27.1109	-0.339662	S0
27.1193	-0.33967	S0
27.1276	-0.339678	S0
27.1359	-0.339685	S0
27.1443	-0.339695	S0
27.152	-0.339706	S0
27.1607	-0.339714	S0
27.1694	-0.339722	S0
27.1771	-0.339731	S0
27.1862	-0.339741	S0
27.1942	-0.339752	S0
27.2022	-0.33976	S0
27.2109	-0.339766	S0
27.2187	-0.339772	S0
27.2274	-0.339778	S0
27.2359	-0.339785	S0
27.2435	-0.339793	S0
27.2524	-0.339806	S0
27.2604	-0.339826	S0
27.2694	-0.339843	S0
27.2774	-0.339855	S0
27.2853	-0.339865	S0
27.2942	-0.339874	S0
27.3023	-0.339882	S0
27.3108	-0.339889	S0
27.319	-0.339896	S0
27.3268	-0.339902	S0
27.3356	-0.339908	S0
27.3438	-0.339915	S0
27.3521	-0.339921	S0
27.3602	-0.339928	S0
27.369	-0.339935	S0
27.3774	-0.339941	S0
27.3852	-0.339947	S0
27.3937	-0.339954	S0
27.4022	-0.339961	S0
27.4103	-0.339969	S0
27.4184	-0.339977	S0
27.4271	-0.339985	S0
27.4351	-0.339995	S0
27.4432	-0.340005	S0
27.4514	-0.340012	S0
27.4606	-0.340019	S0
27.4684	-0.340026	S0
27.477	-0.340033	S0
27.485	-0.340039	S0
27.4935	-0.340047	S0
27.5022	-0.340054	S0
27.5102	-0.340061	S0
27.5184	-0.34007	S0
27.5267	-0.340078	S0
27.5351	-0.340086	S0
27.5434	-0.340093	S0
27.5514	-0.3401	S0
27.5597	-0.340106	S0
27.5687	-0.340112	S0
27.5765	-0.340118	S0
27.585	-0.340125	S0
27.5932	-0.340131	S0
27.6019	-0.340138	S0
27.6103	-0.340144	S0
27.6187	-0.34015	S0
27.6271	-0.340157	S0
27.635	-0.340165	S0
27.6433	-0.340176	S0
27.6516	-0.340184	S0
27.6603	-0.340192	S0
27.6681	-0.340199	S0
27.6768	-0.340208	S0
27.6849	-0.340215	S0
27.6929	-0.340222	S0
27.7014	-0.340228	S0
27.7097	-0.340234	S0
27.718	-0.340241	S0
27.7264	-0.340248	S0
27.7345	-0.340256	S0
27.7436	-0.340262	S0
27.7517	-0.340269	S0
27.7602	-0.340275	S0
27.7683	-0.340282	S0
27.7767	-0.340289	S0
27.785	-0.340295	S0
27.7929	-0.3403	S0
27.8016	-0.340305	S0
27.8095	-0.340309	S0
27.8179	-0.340314	S0
27.8256	-0.34032	S0
27.8347	-0.340325	S0
27.8424	-0.340331	S0
27.8515	-0.340343	S0
27.8601	-0.340365	S0
27.8689	-0.340387	S0
27.8771	-0.340409	S0
27.8849	-0.340427	S0
27.8934	-0.340441	S0
27.9012	-0.340453	S0
27.9099	-0.340464	S0
27.918	-0.340469	S0
27.9267	-0.340474	S0
27.9349	-0.340479	S0
27.942	-0.340484	S0
27.951	-0.340489	S0
27.9589	-0.340494	S0
27.9675	-0.340499	S0
27.976	-0.340505	S0
27.9845	-0.340512	S0
27.9925	-0.340519	S0
28.0012	-0.340526	S0
28.01	-0.340535	S0
28.0179	-0.340541	S0
28.0269	-0.340546	S0
28.0351	-0.340553	S0
28.043	-0.34056	S0
28.0513	-0.340567	S0
28.0593	-0.340573	S0
28.0677	-0.34058	S0
28.076	-0.340586	S0
28.0845	-0.340591	S0
28.0928	-0.340597	S0
28.1013	-0.340602	S0
28.1097	-0.340608	S0
28.1178	-0.340613	S0
28.1262	-0.340618	S0
28.1343	-0.340624	S0
28.1431	-0.34063	S0
28.1511	-0.340635	S0
28.1592	-0.340641	S0
28.168	-0.340647	S0
28.1762	-0.340653	S0
28.1843	-0.340658	S0
28.1924	-0.340664	S0
28.2012	-0.34067	S0
28.2095	-0.340675	S0
28.2178	-0.340681	S0
28.2261	-0.340686	S0
28.2344	-0.340691	S0
28.2427	-0.340696	S0
28.251	-0.3407	S0
28.2594	-0.340704	S0
28.2675	-0.340709	S0
28.2757	-0.340713	S0
28.284	-0.340718	S0
28.2924	-0.340722	S0
28.3005	-0.340727	S0
28.3089	-0.340731	S0
28.3179	-0.340736	S0
28.3263	-0.340741	S0
28.3346	-0.340746	S0
28.3425	-0.340752	S0
28.3511	-0.340758	S0
28.3593	-0.340765	S0
28.3675	-0.340772	S0
28.3759	-0.340777	S0
28.3842	-0.340785	S0
28.3922	-0.340794	S0
28.401	-0.340802	S0
28.4093	-0.340812	S0
28.4177	-0.340822	S0
28.4269	-0.340836	S0
28.4347	-0.340844	S0
28.4429	-0.340851	S0
28.4514	-0.340857	S0
28.4598	-0.340861	S0
28.4676	-0.340865	S0
28.4765	-0.340868	S0
28.4844	-0.340872	S0
28.4923	-0.340875	S0
28.5011	-0.340879	S0
28.5087	-0.340883	S0
28.5174	-0.340888	S0
28.5262	-0.340892	S0
28.5341	-0.340898	S0
28.542	-0.340903	S0
28.5509	-0.340909	S0
28.5588	-0.340914	S0
28.567	-0.34092	S0
28.5756	-0.340926	S0
28.5847	-0.340931	S0
28.5929	-0.340935	S0
28.6015	-0.340939	S0
28.6094	-0.340945	S0
28.618	-0.34095	S0
28.6259	-0.340955	S0
28.6343	-0.34096	S0
28.6425	-0.340966	S0
28.651	-0.340971	S0
28.6595	-0.340976	S0
28.6671	-0.340982	S0
28.6759	-0.340987	S0
28.6843	-0.340992	S0
28.6924	-0.340996	S0
28.7008	-0.341001	S0
28.7091	-0.341005	S0
28.7181	-0.34101	S0
28.7268	-0.341016	S0
28.7348	-0.341021	S0
28.7425	-0.341028	S0
28.7513	-0.341036	S0
28.7594	-0.341043	S0
28.7679	-0.34105	S0
28.7757	-0.341055	S0
28.7845	-0.341059	S0
28.793	-0.341063	S0
28.8003	-0.341067	S0
28.8089	-0.341071	S0
28.8177	-0.341074	S0
28.8265	-0.341077	S0
28.8337	-0.341081	S0
28.8427	-0.341086	S0
28.8511	-0.34109	S0
28.8594	-0.341095	S0
28.8679	-0.3411	S0
28.8757	-0.341105	S0
28.8841	-0.34111	S0
28.8925	-0.341115	S0
28.9016	-0.34112	S0
28.9096	-0.341124	S0
28.9181	-0.341128	S0
28.926	-0.341133	S0
28.9352	-0.34114	S0
28.9426	-0.341145	S0
28.9507	-0.34115	S0
28.9592	-0.341156	S0
28.9679	-0.34116	S0
28.9757	-0.341164	S0
28.9844	-0.341168	S0
28.9926	-0.341173	S0
29.0008	-0.341177	S0
29.0094	-0.341181	S0
29.0173	-0.341184	S0
29.0266	-0.341188	S0
29.0346	-0.341192	S0
29.0429	-0.341196	S0
29.0512	-0.3412	S0
29.0593	-0.341204	S0
29.0676	-0.341207	S0
29.076	-0.341211	S0
29.0845	-0.341215	S0
29.0925	-0.34122	S0
29.101	-0.341226	S0
29.1087	-0.341231	S0
29.1176	-0.341236	S0
29.1259	-0.341239	S0
29.1349	-0.341243	S0
29.1423	-0.341246	S0
29.1508	-0.341249	S0
29.1592	-0.341252	S0
29.1676	-0.341254	S0
29.1762	-0.341258	S0
29.1842	-0.34126	S0
29.1929	-0.341264	S0
29.2015	-0.341267	S0
29.2093	-0.34127	S0
29.2174	-0.341274	S0
29.2261	-0.341277	S0
29.2341	-0.341281	S0
29.2426	-0.341284	S0
29.2509	-0.341287	S0
29.2594	-0.341291	S0
29.2674	-0.341294	S0
29.2756	-0.341297	S0
29.2839	-0.341301	S0
29.2927	-0.341304	S0
29.3012	-0.341307	S0
29.3099	-0.341311	S0
29.3174	-0.341313	S0
29.326	-0.341317	S0
29.3342	-0.34132	S0
29.3419	-0.341323	S0
29.3504	-0.341327	S0
29.3589	-0.34133	S0
29.3675	-0.341334	S0
29.376	-0.341338	S0
29.3846	-0.341341	S0
29.393	-0.341344	S0
29.4016	-0.341348	S0
29.41	-0.341353	S0
29.4175	-0.341358	S0
29.4261	-0.341366	S0
29.434	-0.341371	S0
29.4425	-0.341377	S0
29.4512	-0.341382	S0
29.4594	-0.341386	S0
29.4681	-0.34139	S0
29.4758	-0.341393	S0
29.4847	-0.341396	S0
29.4929	-0.341399	S0
29.5016	-0.341402	S0
29.5096	-0.341406	S0
29.5179	-0.341411	S0
29.5265	-0.341417	S0
29.5345	-0.341424	S0
29.5425	-0.341428	S0
29.5515	-0.341432	S0
29.559	-0.341436	S0
29.5672	-0.34144	S0
29.5761	-0.341444	S0
29.5845	-0.341448	S0
29.5927	-0.341452	S0
29.6011	-0.341456	S0
29.6097	-0.341461	S0
29.618	-0.341466	S0
29.6259	-0.34147	S0
29.6349	-0.341473	S0
29.6425	-0.341476	S0
29.651	-0.341479	S0
29.6598	-0.341481	S0
29.6681	-0.341484	S0
29.6765	-0.341488	S0
29.6846	-0.34149	S0
29.6924	-0.341493	S0
29.7014	-0.341496	S0
29.7097	-0.3415	S0
29.7178	-0.341503	S0
29.7262	-0.341507	S0
29.7344	-0.341511	S0
29.7429	-0.341515	S0
29.7509	-0.34152	S0
29.7593	-0.341524	S0
29.7677	-0.341528	S0
29.7763	-0.341532	S0
29.785	-0.341535	S0
29.7933	-0.341537	S0
29.801	-0.341538	S0
29.8098	-0.341539	S0
29.8176	-0.341541	S0
29.8255	-0.341543	S0
29.8347	-0.341546	S0
29.8433	-0.34155	S0
29.8518	-0.341554	S0
29.8596	-0.341559	S0
29.8683	-0.341565	S0
29.8768	-0.341569	S0
29.885	-0.341573	S0
29.8934	-0.341576	S0
29.9014	-0.341579	S0
29.9097	-0.341582	S0
29.9182	-0.341584	S0
29.9265	-0.341585	S0
29.9346	-0.341587	S0
29.943	-0.34159	S0
29.9515	-0.341593	S0
29.9594	-0.341596	S0
29.9681	-0.341599	S0
29.9767	-0.341602	S0
29.9854	-0.341605	S0
29.9925	-0.341609	S0
30.0021	-0.341612	S0
30.0096	-0.341617	S0
30.0179	-0.341621	S0
30.0268	-0.341625	S0
30.0348	-0.341628	S0
30.043	-0.341631	S0
30.0516	-0.341634	S0
30.0598	-0.341637	S0
30.068	-0.34164	S0
30.0768	-0.341643	S0
30.0851	-0.341646	S0
30.093	-0.341648	S0
30.1013	-0.341651	S0
30.1104	-0.341654	S0
30.118	-0.341658	S0
30.1272	-0.341661	S0
30.1348	-0.341665	S0
30.143	-0.341669	S0
30.1518	-0.341673	S0
30.1594	-0.341677	S0
30.168	-0.341682	S0
30.1764	-0.341686	S0
30.1848	-0.34169	S0
30.1926	-0.341693	S0
30.2013	-0.341695	S0
30.2097	-0.341697	S0
30.2183	-0.341698	S0
30.2266	-0.3417	S0
30.2352	-0.341701	S0
30.2433	-0.341703	S0
30.2519	-0.341705	S0
30.2605	-0.341707	S0
30.2686	-0.34171	S0
30.2769	-0.341712	S0
30.2854	-0.341714	S0
30.2926	-0.341716	S0
30.3016	-0.341718	S0
30.3096	-0.34172	S0
30.3179	-0.341723	S0
30.3262	-0.341724	S0
30.3353	-0.341727	S0
30.3435	-0.34173	S0
30.3515	-0.341733	S0
30.3596	-0.341735	S0
30.3681	-0.341737	S0
30.3771	-0.341739	S0
30.3844	-0.341741	S0
30.3935	-0.341742	S0
30.4019	-0.341743	S0
30.4102	-0.341745	S0
30.4185	-0.341746	S0
30.4272	-0.341747	S0
30.4352	-0.341749	S0
30.4434	-0.341752	S0
30.4514	-0.341755	S0
30.4601	-0.341758	S0
30.4684	-0.341763	S0
30.4766	-0.341766	S0
30.4851	-0.341769	S0
30.4935	-0.341771	S0
30.5021	-0.341772	S0
30.5098	-0.341772	S0
30.5186	-0.34177	S0
30.5265	-0.341768	S0
30.5354	-0.341767	S0
30.5435	-0.341766	S0
30.5517	-0.341767	S0
30.5603	-0.34177	S0
30.5683	-0.341773	S0
30.5768	-0.341777	S0
30.5849	-0.341782	S0
30.5935	-0.341783	S0
30.602	-0.341785	S0
30.6104	-0.341785	S0
30.6184	-0.341785	S0
30.627	-0.341785	S0
30.6354	-0.341785	S0
30.6437	-0.341785	S0
30.6519	-0.341787	S0
30.6597	-0.34179	S0
30.6686	-0.341793	S0
30.6763	-0.341795	S0
30.6849	-0.341797	S0
30.6933	-0.3418	S0
30.7016	-0.341802	S0
30.7097	-0.341803	S0
30.7184	-0.341804	S0
30.7269	-0.341805	S0
30.7353	-0.341805	S0
30.744	-0.341806	S0
30.7523	-0.341807	S0
30.7602	-0.341808	S0
30.769	-0.341809	S0
30.7771	-0.34181	S0
30.7852	-0.341811	S0
30.7936	-0.341813	S0
30.8017	-0.341814	S0
30.8103	-0.341816	S0
30.8182	-0.341818	S0
30.8265	-0.34182	S0
30.8353	-0.341822	S0
30.8433	-0.341824	S0
30.8519	-0.341825	S0
30.8605	-0.341826	S0
30.8686	-0.341828	S0
30.8764	-0.34183	S0
30.8854	-0.341832	S0
30.8935	-0.341834	S0
30.9024	-0.341835	S0
30.9105	-0.341837	S0
30.9192	-0.341839	S0
30.9271	-0.34184	S0
30.9355	-0.341841	S0
30.9436	-0.341841	S0
30.9521	-0.341842	S0
30.9603	-0.341843	S0
30.9687	-0.341844	S0
30.9768	-0.341845	S0
30.9852	-0.341847	S0
30.994	-0.341849	S0
31.002	-0.341852	S0
31.0105	-0.341854	S0
31.0184	-0.341856	S0
31.0273	-0.341857	S0
31.0354	-0.341858	S0
31.0434	-0.341859	S0
31.0525	-0.34186	S0
31.0604	-0.341862	S0
31.0683	-0.341864	S0
31.077	-0.341867	S0
31.0855	-0.34187	S0
31.0938	-0.341873	S0
31.1028	-0.341876	S0
31.1107	-0.341879	S0
31.1185	-0.34188	S0
31.127	-0.341881	S0
31.1355	-0.341882	S0
31.1437	-0.341884	S0
31.152	-0.341885	S0
31.1608	-0.341886	S0
31.1687	-0.341888	S0
31.1775	-0.34189	S0
31.1851	-0.341891	S0
31.194	-0.341893	S0
31.2027	-0.341894	S0
31.211	-0.341895	S0
31.2191	-0.341897	S0
31.2273	-0.341899	S0
31.2362	-0.341901	S0
31.2445	-0.341903	S0
31.2527	-0.341905	S0
31.2609	-0.341908	S0
31.2695	-0.341909	S0
31.2781	-0.341911	S0
31.2861	-0.341913	S0
31.2941	-0.341914	S0
31.3026	-0.341915	S0
31.3113	-0.341916	S0
31.3193	-0.341916	S0
31.3275	-0.341916	S0
31.3356	-0.341917	S0
31.3446	-0.341918	S0
31.3526	-0.34192	S0
31.3612	-0.341921	S0
31.3699	-0.341922	S0
31.3783	-0.341924	S0
31.3865	-0.341926	S0
31.3946	-0.341928	S0
31.4031	-0.34193	S0
31.4116	-0.341932	S0
31.4199	-0.341934	S0
31.4278	-0.341936	S0
31.4361	-0.341939	S0
31.4447	-0.341942	S0
31.4529	-0.341943	S0
31.4615	-0.341945	S0
31.4697	-0.341946	S0
31.4785	-0.341948	S0
31.486	-0.341948	S0
31.4946	-0.341948	S0
31.5025	-0.341949	S0
31.511	-0.34195	S0
31.5195	-0.341951	S0
31.5277	-0.341952	S0
31.5357	-0.341954	S0
31.5443	-0.341955	S0
31.5531	-0.341955	S0
31.5616	-0.341956	S0
31.5694	-0.341958	S0
31.578	-0.341958	S0
31.5865	-0.341959	S0
31.5947	-0.34196	S0
31.6029	-0.341961	S0
31.6115	-0.341962	S0
31.6195	-0.341963	S0
31.6283	-0.341964	S0
31.6368	-0.341964	S0
31.6446	-0.341965	S0
31.6532	-0.341966	S0
31.6618	-0.341967	S0
31.6702	-0.341969	S0
31.6785	-0.34197	S0
31.6868	-0.341971	S0
31.695	-0.341973	S0
31.7031	-0.341975	S0
31.7114	-0.341978	S0
31.7202	-0.341979	S0
31.7286	-0.341981	S0
31.7363	-0.341981	S0
31.7449	-0.341981	S0
31.7531	-0.341983	S0
31.762	-0.341984	S0
31.7698	-0.341985	S0
31.7782	-0.341986	S0
31.786	-0.341988	S0
31.7945	-0.34199	S0
31.8032	-0.341993	S0
31.8117	-0.341994	S0
31.8196	-0.341994	S0
31.8283	-0.341995	S0
31.8365	-0.341996	S0
31.8447	-0.341997	S0
31.8533	-0.341998	S0
31.8618	-0.341998	S0
31.8704	-0.341999	S0
31.8779	-0.342	S0
31.8863	-0.342	S0
31.8943	-0.342001	S0
31.9033	-0.342002	S0
31.9114	-0.342003	S0
31.9197	-0.342003	S0
31.9281	-0.342003	S0
31.9365	-0.342003	S0
31.945	-0.342004	S0
31.9532	-0.342005	S0
31.9613	-0.342006	S0
31.9696	-0.342007	S0
31.9792	-0.342007	S0
31.9868	-0.342008	S0
31.9947	-0.342008	S0
32.0033	-0.342009	S0
32.011	-0.34201	S0
32.0202	-0.342011	S0
32.0281	-0.342013	S0
32.0372	-0.342017	S0
32.0451	-0.34202	S0
32.0537	-0.342023	S0
32.0619	-0.342026	S0
32.0702	-0.342028	S0
32.0784	-0.34203	S0
32.0867	-0.342031	S0
32.0953	-0.342031	S0
32.1028	-0.342033	S0
32.1116	-0.342035	S0
32.1201	-0.342036	S0
32.1285	-0.342038	S0
32.1365	-0.342038	S0
32.1449	-0.342038	S0
32.1534	-0.34204	S0
32.1614	-0.34204	S0
32.1696	-0.342041	S0
32.178	-0.342042	S0
32.1863	-0.342044	S0
32.1949	-0.342046	S0
32.2038	-0.342048	S0
32.2116	-0.342049	S0
32.2199	-0.34205	S0
32.2283	-0.342051	S0
32.2366	-0.342051	S0
32.2448	-0.34205	S0
32.2538	-0.342049	S0
32.2624	-0.342048	S0
32.2705	-0.342048	S0
32.2781	-0.342047	S0
32.2871	-0.342046	S0
32.295	-0.342045	S0
32.3031	-0.342043	S0
32.3117	-0.342041	S0
32.3199	-0.342044	S0
32.3283	-0.342048	S0
32.337	-0.34205	S0
32.3452	-0.342052	S0
32.3535	-0.342054	S0
32.3618	-0.342056	S0
32.3696	-0.342058	S0
32.3779	-0.342059	S0
32.3865	-0.342059	S0
32.3948	-0.342059	S0
32.4037	-0.342059	S0
32.4115	-0.342059	S0
32.4202	-0.34206	S0
32.4284	-0.34206	S0
32.4366	-0.34206	S0
32.4455	-0.34206	S0
32.4539	-0.34206	S0
32.4621	-0.342061	S0
32.4702	-0.34206	S0
32.4786	-0.34206	S0
32.4873	-0.342061	S0
32.4952	-0.342061	S0
32.5042	-0.342061	S0
32.5118	-0.342061	S0
32.5202	-0.342062	S0
32.5285	-0.342062	S0
32.5371	-0.342062	S0
32.5449	-0.342064	S0
32.5533	-0.342064	S0
32.5622	-0.342064	S0
32.5705	-0.342065	S0
32.5792	-0.342066	S0
32.5871	-0.342068	S0
32.595	-0.342069	S0
32.6037	-0.34207	S0
32.6116	-0.342072	S0
32.62	-0.342074	S0
32.629	-0.342075	S0
32.637	-0.342077	S0
32.6455	-0.34208	S0
32.6542	-0.342082	S0
32.6627	-0.342083	S0
32.671	-0.342084	S0
32.6789	-0.342086	S0
32.6873	-0.342087	S0
32.6952	-0.342088	S0
32.704	-0.342089	S0
32.712	-0.34209	S0
32.721	-0.34209	S0
32.7285	-0.34209	S0
32.7374	-0.342092	S0
32.746	-0.342093	S0
32.7539	-0.342093	S0
32.7619	-0.342093	S0
32.7702	-0.342094	S0
32.7797	-0.342095	S0
32.7878	-0.342096	S0
32.7954	-0.342097	S0
32.8041	-0.342098	S0
32.8124	-0.342098	S0
32.8206	-0.342098	S0
32.8293	-0.3421	S0
32.8376	-0.342101	S0
32.846	-0.342103	S0
32.8545	-0.342105	S0
32.8623	-0.342107	S0
32.8703	-0.342109	S0
32.8787	-0.342111	S0
32.8875	-0.342111	S0
32.8959	-0.342112	S0
32.9039	-0.342112	S0
32.912	-0.342112	S0
32.9203	-0.342112	S0
32.929	-0.342113	S0
32.9374	-0.342114	S0
32.9457	-0.342116	S0
32.9542	-0.342119	S0
32.9625	-0.342121	S0
32.971	-0.342122	S0
32.9794	-0.342124	S0
32.9871	-0.342125	S0
32.9959	-0.342126	S0
33.0044	-0.342127	S0
33.0126	-0.342128	S0
33.0215	-0.342128	S0
33.0295	-0.342128	S0
33.0376	-0.342129	S0
33.0462	-0.342129	S0
33.0545	-0.342129	S0
33.0623	-0.342129	S0
33.071	-0.34213	S0
33.0795	-0.34213	S0
33.0873	-0.34213	S0
33.0962	-0.342131	S0
33.105	-0.342132	S0
33.1127	-0.342133	S0
33.1211	-0.342135	S0
33.13	-0.342138	S0
33.1381	-0.342141	S0
33.1464	-0.342145	S0
33.1547	-0.342147	S0
33.1632	-0.34215	S0
33.1708	-0.342151	S0
33.18	-0.342152	S0
33.1881	-0.342153	S0
33.1963	-0.342153	S0
33.205	-0.342153	S0
33.213	-0.342153	S0
33.2218	-0.342153	S0
33.2292	-0.342154	S0
33.2378	-0.342154	S0
33.2467	-0.342155	S0
33.2546	-0.342156	S0
33.2629	-0.342158	S0
33.2715	-0.342161	S0
33.2796	-0.342163	S0
33.2882	-0.342166	S0
33.2961	-0.342168	S0
33.3052	-0.34217	S0
33.3133	-0.342172	S0
33.3218	-0.342174	S0
33.3299	-0.342176	S0
33.3382	-0.342177	S0
33.347	-0.342178	S0
33.3548	-0.342179	S0
33.3637	-0.342179	S0
33.3712	-0.34218	S0
33.3798	-0.342181	S0
33.3883	-0.342182	S0
33.3964	-0.342183	S0
33.405	-0.342184	S0
33.4134	-0.342185	S0
33.4215	-0.342186	S0
33.4302	-0.342186	S0
33.4383	-0.342187	S0
33.4464	-0.342186	S0
33.455	-0.342185	S0
33.4632	-0.342184	S0
33.4714	-0.342184	S0
33.4795	-0.342181	S0
33.488	-0.342179	S0
33.4967	-0.342178	S0
33.5054	-0.342179	S0
33.5135	-0.342181	S0
33.5219	-0.342183	S0
33.5301	-0.342185	S0
33.5382	-0.342188	S0
33.5459	-0.342191	S0
33.5552	-0.342193	S0
33.5631	-0.342195	S0
33.5716	-0.342196	S0
33.5797	-0.342196	S0
33.5885	-0.342196	S0
33.5965	-0.342196	S0
33.605	-0.342196	S0
33.6137	-0.342195	S0
33.6215	-0.342195	S0
33.6296	-0.342195	S0
33.6382	-0.342195	S0
33.6466	-0.342195	S0
33.6548	-0.342195	S0
33.6636	-0.342195	S0
33.6715	-0.342195	S0
33.68	-0.342194	S0
33.6888	-0.342195	S0
33.6973	-0.342195	S0
33.7055	-0.342194	S0
33.7138	-0.342195	S0
33.7223	-0.342196	S0
33.7301	-0.342197	S0
33.7385	-0.342198	S0
33.7468	-0.342198	S0
33.755	-0.342199	S0
33.763	-0.3422	S0
33.7711	-0.3422	S0
33.7799	-0.3422	S0
33.7885	-0.342201	S0
33.7969	-0.342202	S0
33.8052	-0.342202	S0
33.8131	-0.342203	S0
33.8212	-0.342204	S0
33.83	-0.342205	S0
33.8383	-0.342206	S0
33.8469	-0.342206	S0
33.8556	-0.342206	S0
33.8641	-0.342206	S0
33.8719	-0.342206	S0
33.8803	-0.342207	S0
33.8881	-0.342207	S0
33.897	-0.342208	S0
33.9049	-0.342209	S0
33.9133	-0.34221	S0
33.9221	-0.34221	S0
33.9301	-0.34221	S0
33.9381	-0.342209	S0
33.947	-0.342208	S0
33.9548	-0.342206	S0
33.9631	-0.342204	S0
33.9721	-0.342202	S0
33.9807	-0.342201	S0
33.9882	-0.3422	S0
33.9968	-0.342199	S0
34.0049	-0.342199	S0
34.0135	-0.342198	S0
34.0217	-0.342198	S0
34.0308	-0.342199	S0
34.0387	-0.342199	S0
34.0472	-0.342198	S0
34.0551	-0.342198	S0
34.0635	-0.342198	S0
34.0717	-0.342198	S0
34.0799	-0.342199	S0
34.0887	-0.342199	S0
34.0971	-0.3422	S0
34.1059	-0.3422	S0
34.1139	-0.3422	S0
34.1223	-0.3422	S0
34.1295	-0.342199	S0
34.1389	-0.342199	S0
34.1466	-0.342199	S0
34.1552	-0.342199	S0
34.1635	-0.3422	S0
34.1714	-0.342201	S0
34.1807	-0.342201	S0
34.1884	-0.342202	S0
34.1973	-0.342202	S0
34.205	-0.342202	S0
34.2136	-0.342201	S0
34.2216	-0.3422	S0
34.2297	-0.342199	S0
34.2384	-0.342198	S0
34.2471	-0.342196	S0
34.2558	-0.342196	S0
34.2636	-0.342197	S0
34.2722	-0.342197	S0
34.2803	-0.342198	S0
34.2884	-0.342199	S0
34.297	-0.3422	S0
34.306	-0.342201	S0
34.314	-0.342201	S0
34.3226	-0.342201	S0
34.3307	-0.342202	S0
34.3392	-0.342201	S0
34.3475	-0.342201	S0
34.3562	-0.342201	S0
34.3644	-0.342201	S0
34.3723	-0.3422	S0
34.3803	-0.3422	S0
34.3889	-0.342199	S0
34.3976	-0.342199	S0
34.406	-0.342198	S0
34.4142	-0.342198	S0
34.4223	-0.342198	S0
34.4302	-0.342199	S0
34.439	-0.342199	S0
34.4472	-0.342199	S0
34.4555	-0.342198	S0
34.464	-0.342197	S0
34.4719	-0.342196	S0
34.4804	-0.342195	S0
34.4889	-0.342194	S0
34.4975	-0.342194	S0
34.5061	-0.342193	S0
34.5146	-0.342193	S0
34.5221	-0.342194	S0
34.5305	-0.342195	S0
34.5389	-0.342195	S0
34.5471	-0.342196	S0
34.5558	-0.342196	S0
34.5638	-0.342196	S0
34.5721	-0.342197	S0
34.5808	-0.342197	S0
34.5889	-0.342197	S0
34.598	-0.342197	S0
34.6061	-0.342197	S0
34.6147	-0.342197	S0
34.6221	-0.342197	S0
34.631	-0.342197	S0
34.6394	-0.342196	S0
34.648	-0.342196	S0
34.656	-0.342195	S0
34.6639	-0.342195	S0
34.6728	-0.342194	S0
34.6811	-0.342193	S0
34.689	-0.342192	S0
34.6981	-0.342192	S0
34.7062	-0.342192	S0
34.7144	-0.342192	S0
34.7225	-0.342191	S0
34.7311	-0.342191	S0
34.7396	-0.342191	S0
34.7468	-0.34219	S0
34.756	-0.34219	S0
34.7635	-0.34219	S0
34.7724	-0.342191	S0
34.7808	-0.342192	S0
34.7888	-0.342193	S0
34.7978	-0.342193	S0
34.8061	-0.342194	S0
34.8148	-0.342194	S0
34.8227	-0.342194	S0
34.831	-0.342193	S0
34.8391	-0.342193	S0
34.8477	-0.342191	S0
34.856	-0.342191	S0
34.8643	-0.342191	S0
34.8729	-0.342191	S0
34.8816	-0.342191	S0
34.8903	-0.342192	S0
34.8975	-0.342193	S0
34.9067	-0.342193	S0
34.9148	-0.342194	S0
34.9226	-0.342194	S0
34.9315	-0.342194	S0
34.9398	-0.342194	S0
34.9475	-0.342193	S0
34.956	-0.342192	S0
34.9646	-0.34219	S0
34.9729	-0.342189	S0
34.9813	-0.342189	S0
34.9898	-0.342189	S0
34.9979	-0.342188	S0
35.0066	-0.342188	S0
35.0148	-0.342188	S0
35.0233	-0.342188	S0
35.0314	-0.342188	S0
35.0399	-0.342188	S0
35.0489	-0.342188	S0
35.0561	-0.342189	S0
35.0648	-0.342192	S0
35.0728	-0.342193	S0
35.0814	-0.342195	S0
35.0897	-0.342195	S0
35.0984	-0.342195	S0
35.1066	-0.342196	S0
35.1154	-0.342195	S0
35.1231	-0.342195	S0
35.1315	-0.342195	S0
35.1404	-0.342195	S0
35.1484	-0.342195	S0
35.1568	-0.342196	S0
35.1648	-0.342197	S0
35.173	-0.342198	S0
35.1813	-0.342199	S0
35.1904	-0.342199	S0
35.1987	-0.3422	S0
35.2068	-0.3422	S0
35.2147	-0.3422	S0
35.2232	-0.342201	S0
35.2315	-0.342201	S0
35.2403	-0.342201	S0
35.2482	-0.342201	S0
[truncated: 21,830 more rows]

## Sheet: BSA_Trehalose
Temperature	Heat Flow (Normalized)	Sample
20.0198	-0.0152983	T0
20.0194	-0.0152982	T0
20.02	-0.0152984	T0
20.0197	-0.0152981	T0
20.0197	-0.0152977	T0
20.0198	-0.0152975	T0
20.0202	-0.0152972	T0
20.0193	-0.0152971	T0
20.0202	-0.015297	T0
20.0188	-0.0152968	T0
20.0189	-0.0152967	T0
20.0199	-0.0152965	T0
20.0199	-0.0152966	T0
20.0195	-0.0152964	T0
20.0203	-0.0152961	T0
20.0197	-0.0152958	T0
20.0198	-0.0152959	T0
20.021	-0.0152963	T0
20.0212	-0.0152967	T0
20.0215	-0.0152974	T0
20.0202	-0.0152982	T0
20.0212	-0.015299	T0
20.0211	-0.0153001	T0
20.0218	-0.015302	T0
20.0218	-0.0153042	T0
20.0223	-0.0153066	T0
20.0227	-0.0153098	T0
20.0227	-0.0153182	T0
20.0233	-0.0153302	T0
20.0239	-0.0153475	T0
20.0235	-0.0153685	T0
20.024	-0.0154023	T0
20.0237	-0.0154473	T0
20.0246	-0.0155111	T0
20.0255	-0.0156027	T0
20.026	-0.0157208	T0
20.026	-0.0158732	T0
20.0275	-0.0160744	T0
20.0274	-0.0163363	T0
20.0282	-0.0166488	T0
20.0288	-0.0169958	T0
20.0287	-0.0173556	T0
20.0299	-0.0177496	T0
20.0297	-0.0181953	T0
20.0304	-0.0187087	T0
20.0315	-0.0191957	T0
20.0326	-0.0197365	T0
20.0329	-0.020259	T0
20.0342	-0.0207557	T0
20.0357	-0.0212837	T0
20.0367	-0.0217511	T0
20.0373	-0.022241	T0
20.0386	-0.0227318	T0
20.0398	-0.0233428	T0
20.0408	-0.0239045	T0
20.0416	-0.0245055	T0
20.0427	-0.0251297	T0
20.0445	-0.025802	T0
20.045	-0.0264814	T0
20.0464	-0.0272405	T0
20.048	-0.0280247	T0
20.0497	-0.0288467	T0
20.0512	-0.0296811	T0
20.0523	-0.0305368	T0
20.0538	-0.0313915	T0
20.0557	-0.0322952	T0
20.0574	-0.0332405	T0
20.0591	-0.0341694	T0
20.0611	-0.0351201	T0
20.0624	-0.0361116	T0
20.0644	-0.0371447	T0
20.0669	-0.0382225	T0
20.0686	-0.0393264	T0
20.0705	-0.0404109	T0
20.0724	-0.0415837	T0
20.0747	-0.04269	T0
20.0768	-0.0438725	T0
20.0793	-0.0451145	T0
20.0817	-0.0463739	T0
20.0833	-0.0476151	T0
20.0852	-0.048921	T0
20.088	-0.0502361	T0
20.0904	-0.0516107	T0
20.0932	-0.0529881	T0
20.0956	-0.0543372	T0
20.0983	-0.0557372	T0
20.1006	-0.05713	T0
20.1029	-0.0585184	T0
20.106	-0.059937	T0
20.1079	-0.0613634	T0
20.1113	-0.0628174	T0
20.1136	-0.064336	T0
20.1165	-0.0658714	T0
20.1197	-0.0673868	T0
20.1223	-0.0689729	T0
20.1258	-0.0705202	T0
20.1289	-0.0721378	T0
20.1319	-0.0737473	T0
20.1357	-0.0753598	T0
20.1382	-0.0769825	T0
20.1419	-0.0785555	T0
20.1451	-0.0801228	T0
20.1477	-0.0817316	T0
20.1512	-0.0833314	T0
20.1543	-0.084876	T0
20.1576	-0.086473	T0
20.1615	-0.0881023	T0
20.165	-0.0897301	T0
20.1681	-0.0913744	T0
20.1714	-0.0930377	T0
20.1756	-0.0947515	T0
20.1793	-0.0964239	T0
20.1832	-0.0980935	T0
20.1865	-0.0997512	T0
20.1912	-0.101394	T0
20.1946	-0.103036	T0
20.1981	-0.104662	T0
20.2023	-0.106278	T0
20.2053	-0.107933	T0
20.2092	-0.10955	T0
20.2138	-0.111161	T0
20.2179	-0.112742	T0
20.2222	-0.114269	T0
20.2256	-0.115894	T0
20.2296	-0.117524	T0
20.2341	-0.119125	T0
20.2378	-0.120746	T0
20.2423	-0.122341	T0
20.2464	-0.124027	T0
20.2509	-0.125586	T0
20.2549	-0.127182	T0
20.259	-0.128755	T0
20.2636	-0.130269	T0
20.2682	-0.131748	T0
20.2725	-0.133261	T0
20.2766	-0.134794	T0
20.2814	-0.136359	T0
20.2861	-0.137919	T0
20.2907	-0.139407	T0
20.2948	-0.140918	T0
20.3007	-0.142394	T0
20.3037	-0.143933	T0
20.3084	-0.14545	T0
20.3135	-0.14691	T0
20.318	-0.148328	T0
20.3226	-0.149758	T0
20.3272	-0.151254	T0
20.3319	-0.152691	T0
20.3367	-0.154087	T0
20.3421	-0.155428	T0
20.3462	-0.156828	T0
20.3508	-0.158156	T0
20.356	-0.159489	T0
20.3616	-0.160851	T0
20.3664	-0.16224	T0
20.3714	-0.163632	T0
20.3761	-0.16496	T0
20.381	-0.166384	T0
20.3862	-0.167672	T0
20.3914	-0.168933	T0
20.3965	-0.170249	T0
20.4012	-0.171578	T0
20.4058	-0.172866	T0
20.411	-0.174148	T0
20.4161	-0.175432	T0
20.422	-0.176731	T0
20.4275	-0.178009	T0
20.4322	-0.179202	T0
20.4375	-0.180473	T0
20.4427	-0.181636	T0
20.4487	-0.182779	T0
20.454	-0.183895	T0
20.4584	-0.185038	T0
20.4641	-0.186178	T0
20.469	-0.187391	T0
20.4737	-0.188617	T0
20.4802	-0.189901	T0
20.4853	-0.191089	T0
20.4911	-0.192276	T0
20.4962	-0.193434	T0
20.5018	-0.194586	T0
20.5072	-0.19571	T0
20.5126	-0.196794	T0
20.5186	-0.197758	T0
20.5236	-0.198794	T0
20.5291	-0.199929	T0
20.5355	-0.201001	T0
20.5411	-0.20211	T0
20.5463	-0.20324	T0
20.5521	-0.204284	T0
20.5582	-0.205298	T0
20.5636	-0.206315	T0
20.5696	-0.207317	T0
20.5753	-0.208344	T0
20.5805	-0.209288	T0
20.5864	-0.210288	T0
20.5921	-0.21131	T0
20.5979	-0.21233	T0
20.6044	-0.213317	T0
20.6095	-0.214343	T0
20.6155	-0.215311	T0
20.6212	-0.216374	T0
20.6273	-0.217375	T0
20.6329	-0.218298	T0
20.6393	-0.219228	T0
20.6453	-0.220107	T0
20.6511	-0.221044	T0
20.657	-0.221944	T0
20.6628	-0.222889	T0
20.6694	-0.223803	T0
20.675	-0.224727	T0
20.681	-0.22558	T0
20.6871	-0.226521	T0
20.6931	-0.22739	T0
20.6993	-0.228338	T0
20.7047	-0.229256	T0
20.7111	-0.230128	T0
20.7171	-0.230995	T0
20.7239	-0.231813	T0
20.7296	-0.232651	T0
20.7359	-0.233483	T0
20.7425	-0.234365	T0
20.7488	-0.235152	T0
20.7552	-0.235943	T0
20.7614	-0.236755	T0
20.7675	-0.237607	T0
20.7735	-0.238388	T0
20.7794	-0.239237	T0
20.7858	-0.240029	T0
20.7921	-0.240779	T0
20.7982	-0.241616	T0
20.8045	-0.242401	T0
20.8112	-0.243213	T0
20.818	-0.244	T0
20.8241	-0.244766	T0
20.8306	-0.245522	T0
20.8367	-0.24629	T0
20.8427	-0.247025	T0
20.8499	-0.247761	T0
20.8562	-0.248436	T0
20.862	-0.249181	T0
20.8692	-0.249912	T0
20.876	-0.250648	T0
20.8822	-0.251362	T0
20.8878	-0.252102	T0
20.8945	-0.252821	T0
20.9009	-0.253536	T0
20.9077	-0.254242	T0
20.9143	-0.254956	T0
20.921	-0.255677	T0
20.9273	-0.256307	T0
20.9345	-0.256996	T0
20.9409	-0.257612	T0
20.9475	-0.25833	T0
20.9542	-0.259016	T0
20.9604	-0.259786	T0
20.9668	-0.260468	T0
20.9743	-0.261155	T0
20.9806	-0.261777	T0
20.9874	-0.262409	T0
20.9941	-0.263079	T0
21.0005	-0.263678	T0
21.0072	-0.264228	T0
21.0142	-0.264778	T0
21.0203	-0.265382	T0
21.0274	-0.266038	T0
21.0345	-0.266655	T0
21.0408	-0.267285	T0
21.0483	-0.267938	T0
21.0545	-0.268544	T0
21.061	-0.269158	T0
21.0681	-0.269778	T0
21.0745	-0.270392	T0
21.0815	-0.270988	T0
21.0884	-0.271539	T0
21.0954	-0.272114	T0
21.102	-0.272665	T0
21.1089	-0.273177	T0
21.1161	-0.273759	T0
21.1231	-0.274309	T0
21.1297	-0.274789	T0
21.137	-0.275391	T0
21.1437	-0.275939	T0
21.1506	-0.276488	T0
21.1573	-0.277017	T0
21.1647	-0.277535	T0
21.1714	-0.278095	T0
21.1785	-0.278627	T0
21.1854	-0.279137	T0
21.1927	-0.279681	T0
21.1997	-0.280225	T0
21.2062	-0.280739	T0
21.2137	-0.281194	T0
21.2197	-0.28163	T0
21.2272	-0.282163	T0
21.234	-0.282626	T0
21.2412	-0.283153	T0
21.2484	-0.283602	T0
21.255	-0.284084	T0
21.2628	-0.284615	T0
21.2694	-0.2852	T0
21.2765	-0.285703	T0
21.284	-0.286168	T0
21.2911	-0.286565	T0
21.2978	-0.286969	T0
21.3051	-0.287474	T0
21.312	-0.287985	T0
21.3188	-0.288459	T0
21.3258	-0.288877	T0
21.3325	-0.289322	T0
21.3405	-0.289785	T0
21.3475	-0.290306	T0
21.3547	-0.290752	T0
21.3621	-0.291171	T0
21.3695	-0.291641	T0
21.3759	-0.292033	T0
21.3846	-0.292484	T0
21.3909	-0.292928	T0
21.3982	-0.293307	T0
21.4052	-0.293744	T0
21.4122	-0.294184	T0
21.4194	-0.294546	T0
21.4273	-0.294985	T0
21.4343	-0.295351	T0
21.4412	-0.295838	T0
21.4484	-0.296268	T0
21.4552	-0.296686	T0
21.4632	-0.297096	T0
21.4705	-0.297493	T0
21.4778	-0.29788	T0
21.4852	-0.298255	T0
21.4924	-0.298711	T0
21.4998	-0.299131	T0
21.5069	-0.299549	T0
21.5145	-0.299854	T0
21.522	-0.300209	T0
21.5294	-0.300532	T0
21.5368	-0.300831	T0
21.5443	-0.301171	T0
21.5511	-0.301467	T0
21.5584	-0.30182	T0
21.5659	-0.302156	T0
21.5732	-0.302571	T0
21.5809	-0.303026	T0
21.5881	-0.303467	T0
21.5954	-0.303843	T0
21.6024	-0.3042	T0
21.6101	-0.304548	T0
21.6174	-0.304949	T0
21.6251	-0.305299	T0
21.6326	-0.305601	T0
21.6399	-0.305901	T0
21.6471	-0.30627	T0
21.6553	-0.306569	T0
21.6624	-0.306925	T0
21.6697	-0.307253	T0
21.6773	-0.307598	T0
21.6849	-0.307868	T0
21.6926	-0.308205	T0
21.7003	-0.308467	T0
21.7072	-0.308744	T0
21.7157	-0.309053	T0
21.7223	-0.309375	T0
21.7293	-0.30967	T0
21.7372	-0.309938	T0
21.7444	-0.310219	T0
21.7524	-0.310584	T0
21.7599	-0.310945	T0
21.7673	-0.31128	T0
21.7745	-0.311654	T0
21.7824	-0.311949	T0
21.79	-0.312214	T0
21.7975	-0.31249	T0
21.8044	-0.31276	T0
21.8127	-0.313035	T0
21.8196	-0.313261	T0
21.8275	-0.313478	T0
21.8348	-0.313738	T0
21.8429	-0.314055	T0
21.8499	-0.314355	T0
21.8583	-0.314628	T0
21.8649	-0.314836	T0
21.8731	-0.315137	T0
21.8806	-0.315437	T0
21.8875	-0.315719	T0
21.8958	-0.315998	T0
21.9032	-0.316316	T0
21.9107	-0.316519	T0
21.9186	-0.316744	T0
21.9266	-0.316957	T0
21.9346	-0.317298	T0
21.9419	-0.317533	T0
21.9492	-0.31776	T0
21.957	-0.317993	T0
21.9649	-0.318227	T0
21.9722	-0.318484	T0
21.9798	-0.318793	T0
21.9868	-0.319073	T0
21.9951	-0.319294	T0
22.0021	-0.319549	T0
22.0102	-0.319711	T0
22.0177	-0.319954	T0
22.0259	-0.320207	T0
22.0332	-0.320463	T0
22.0413	-0.320628	T0
22.0486	-0.320884	T0
22.0567	-0.321098	T0
22.0646	-0.321321	T0
22.0725	-0.3215	T0
22.0795	-0.321735	T0
22.0874	-0.321933	T0
22.0957	-0.322239	T0
22.1027	-0.322446	T0
22.1103	-0.322674	T0
22.1185	-0.322898	T0
22.1264	-0.323158	T0
22.1337	-0.323428	T0
22.1414	-0.323623	T0
22.1493	-0.323847	T0
22.1569	-0.324064	T0
22.1644	-0.324212	T0
22.1728	-0.324453	T0
22.1802	-0.324735	T0
22.188	-0.324982	T0
22.1959	-0.325175	T0
22.2035	-0.32529	T0
22.2114	-0.325408	T0
22.2186	-0.325504	T0
22.2274	-0.325618	T0
22.2343	-0.325798	T0
22.242	-0.325943	T0
22.2499	-0.32611	T0
22.2579	-0.326308	T0
22.266	-0.326588	T0
22.2732	-0.32692	T0
22.2813	-0.327162	T0
22.289	-0.327286	T0
22.2971	-0.327423	T0
22.3051	-0.327554	T0
22.3128	-0.327738	T0
22.3199	-0.328031	T0
22.3281	-0.328202	T0
22.336	-0.328425	T0
22.3437	-0.32855	T0
22.3517	-0.328807	T0
22.3598	-0.329023	T0
22.3676	-0.329137	T0
22.3752	-0.329307	T0
22.3833	-0.329391	T0
22.3913	-0.329458	T0
22.3986	-0.329625	T0
22.4061	-0.329831	T0
22.4142	-0.330059	T0
22.4223	-0.330256	T0
22.4302	-0.330345	T0
22.4382	-0.330506	T0
22.4458	-0.330694	T0
22.454	-0.330838	T0
22.4613	-0.330996	T0
22.4696	-0.331098	T0
22.4774	-0.331209	T0
22.4852	-0.331296	T0
22.4932	-0.331411	T0
22.501	-0.331556	T0
22.5084	-0.3317	T0
22.5169	-0.331906	T0
22.5244	-0.332096	T0
22.5318	-0.332265	T0
22.5401	-0.332452	T0
22.5478	-0.332641	T0
22.5558	-0.332836	T0
22.5637	-0.332998	T0
22.5717	-0.333168	T0
22.5799	-0.333296	T0
22.5872	-0.333413	T0
22.5963	-0.333477	T0
22.6039	-0.333567	T0
22.6119	-0.333678	T0
22.6196	-0.333795	T0
22.627	-0.33395	T0
22.6351	-0.334092	T0
22.6426	-0.334229	T0
22.6509	-0.334385	T0
22.659	-0.334572	T0
22.6667	-0.334754	T0
22.675	-0.334942	T0
22.6826	-0.335129	T0
22.6912	-0.335285	T0
22.6991	-0.335424	T0
22.7069	-0.335571	T0
22.7149	-0.335696	T0
22.7229	-0.335814	T0
22.7307	-0.335924	T0
22.7386	-0.336058	T0
22.7462	-0.336178	T0
22.755	-0.336266	T0
22.7625	-0.336328	T0
22.77	-0.336413	T0
22.7779	-0.336474	T0
22.7861	-0.336563	T0
22.7937	-0.336682	T0
22.8018	-0.336773	T0
22.81	-0.336892	T0
22.8184	-0.337035	T0
22.8258	-0.337206	T0
22.8341	-0.337366	T0
22.8419	-0.337507	T0
22.8496	-0.337627	T0
22.8579	-0.337765	T0
22.8663	-0.337858	T0
22.8737	-0.337928	T0
22.882	-0.338001	T0
22.8899	-0.338092	T0
22.8981	-0.338179	T0
22.9063	-0.338254	T0
22.9141	-0.338346	T0
22.9218	-0.338446	T0
22.9302	-0.338592	T0
22.9377	-0.338785	T0
22.946	-0.338969	T0
22.9542	-0.339138	T0
22.9618	-0.33929	T0
22.9704	-0.339421	T0
22.9784	-0.339558	T0
22.9862	-0.339652	T0
22.9945	-0.339717	T0
23.0029	-0.339769	T0
23.0105	-0.339817	T0
23.0188	-0.339893	T0
23.0257	-0.339996	T0
23.0345	-0.340077	T0
23.0418	-0.340149	T0
23.0503	-0.340235	T0
23.0586	-0.340332	T0
23.0663	-0.340453	T0
23.074	-0.340568	T0
23.0825	-0.340666	T0
23.0905	-0.340747	T0
23.0986	-0.340862	T0
23.1067	-0.341001	T0
23.115	-0.341149	T0
23.1229	-0.341266	T0
23.1312	-0.341376	T0
23.1389	-0.341443	T0
23.1467	-0.341529	T0
23.1548	-0.341598	T0
23.1632	-0.341672	T0
23.171	-0.34175	T0
23.1787	-0.341809	T0
23.1873	-0.341891	T0
23.195	-0.341969	T0
23.2037	-0.342045	T0
23.2118	-0.342182	T0
23.2195	-0.342308	T0
23.2277	-0.342437	T0
23.2357	-0.342579	T0
23.2436	-0.342707	T0
23.2518	-0.342816	T0
23.2604	-0.342936	T0
23.2683	-0.343036	T0
23.276	-0.343099	T0
23.2839	-0.343122	T0
23.2925	-0.343146	T0
23.3008	-0.343179	T0
23.3094	-0.343225	T0
23.3171	-0.343306	T0
23.325	-0.343416	T0
23.3329	-0.343541	T0
23.3414	-0.343678	T0
23.3489	-0.343804	T0
23.3573	-0.343912	T0
23.365	-0.343984	T0
23.3732	-0.344051	T0
23.3814	-0.344089	T0
23.3902	-0.34411	T0
23.3981	-0.344132	T0
23.4061	-0.344162	T0
23.4143	-0.344203	T0
23.4223	-0.344255	T0
23.4301	-0.344332	T0
23.4383	-0.344417	T0
23.4464	-0.344521	T0
23.4548	-0.344635	T0
23.4625	-0.344756	T0
23.4709	-0.34485	T0
23.479	-0.344935	T0
23.4874	-0.345008	T0
23.4949	-0.345063	T0
23.5036	-0.345103	T0
23.5117	-0.345138	T0
23.5197	-0.345174	T0
23.5287	-0.345218	T0
23.5361	-0.345266	T0
23.5442	-0.345331	T0
23.5522	-0.345402	T0
23.5602	-0.34547	T0
23.5686	-0.345541	T0
23.5768	-0.34562	T0
23.5843	-0.345706	T0
23.5935	-0.345806	T0
23.6012	-0.34588	T0
23.6095	-0.345943	T0
23.6176	-0.346012	T0
23.6252	-0.346073	T0
23.6338	-0.346116	T0
23.6415	-0.346144	T0
23.6498	-0.346173	T0
23.6575	-0.346211	T0
23.6659	-0.346263	T0
23.6739	-0.34631	T0
23.6829	-0.346372	T0
23.6911	-0.346437	T0
23.6988	-0.3465	T0
23.7068	-0.346563	T0
23.7148	-0.346623	T0
23.7236	-0.346676	T0
23.7311	-0.346727	T0
23.7394	-0.346782	T0
23.7476	-0.346837	T0
23.7549	-0.346896	T0
23.7633	-0.346943	T0
23.7721	-0.346982	T0
23.7804	-0.347023	T0
23.7887	-0.347066	T0
23.7966	-0.347107	T0
23.8048	-0.347159	T0
23.8133	-0.347217	T0
23.8207	-0.347269	T0
23.8293	-0.347317	T0
23.8375	-0.347375	T0
23.8454	-0.34744	T0
23.8537	-0.347528	T0
23.8622	-0.347597	T0
23.8705	-0.347645	T0
23.8786	-0.347684	T0
23.8869	-0.347731	T0
23.8951	-0.347777	T0
23.9023	-0.347822	T0
23.9112	-0.347866	T0
23.9192	-0.347916	T0
23.9269	-0.347964	T0
23.935	-0.34801	T0
23.9433	-0.348065	T0
23.9516	-0.348128	T0
23.96	-0.348176	T0
23.9688	-0.348211	T0
23.9768	-0.348247	T0
23.985	-0.34828	T0
23.9935	-0.348325	T0
24.0013	-0.34837	T0
24.0092	-0.348402	T0
24.0172	-0.348437	T0
24.0253	-0.348472	T0
24.034	-0.348517	T0
24.0418	-0.348549	T0
24.0499	-0.348582	T0
24.0585	-0.348614	T0
24.0669	-0.34865	T0
24.0751	-0.348686	T0
24.0828	-0.348727	T0
24.0914	-0.348777	T0
24.0992	-0.348828	T0
24.1079	-0.348887	T0
24.116	-0.348954	T0
24.124	-0.34901	T0
24.1325	-0.349051	T0
24.1405	-0.34909	T0
24.1487	-0.349133	T0
24.157	-0.349177	T0
24.1656	-0.349215	T0
24.1739	-0.34925	T0
24.182	-0.349286	T0
24.1896	-0.349324	T0
24.1975	-0.349368	T0
24.2057	-0.349409	T0
24.2145	-0.349448	T0
24.2217	-0.349473	T0
24.2302	-0.349497	T0
24.239	-0.349524	T0
24.247	-0.34956	T0
24.256	-0.349606	T0
24.2631	-0.349659	T0
24.2718	-0.349703	T0
24.2798	-0.349743	T0
24.2882	-0.349778	T0
24.2964	-0.349814	T0
24.3045	-0.349843	T0
24.3124	-0.349867	T0
24.3208	-0.349886	T0
24.3294	-0.349903	T0
24.3376	-0.349923	T0
24.3459	-0.349942	T0
24.3543	-0.349975	T0
24.3623	-0.350008	T0
24.3704	-0.350039	T0
24.3788	-0.350068	T0
24.3868	-0.350102	T0
24.3951	-0.350155	T0
24.4032	-0.3502	T0
24.4114	-0.35023	T0
24.4199	-0.350256	T0
24.4277	-0.350284	T0
24.436	-0.350305	T0
24.4445	-0.350331	T0
24.4528	-0.350351	T0
24.4607	-0.350371	T0
24.4694	-0.350395	T0
24.4775	-0.350417	T0
24.4857	-0.350435	T0
24.4935	-0.350458	T0
24.5019	-0.350485	T0
24.5098	-0.350517	T0
24.5189	-0.350553	T0
24.5262	-0.350581	T0
24.5351	-0.350618	T0
24.543	-0.350656	T0
24.5511	-0.350688	T0
24.5594	-0.350721	T0
24.5677	-0.350757	T0
24.5761	-0.350795	T0
24.5839	-0.350828	T0
24.5921	-0.350863	T0
24.6004	-0.350896	T0
24.6087	-0.350921	T0
24.6169	-0.350935	T0
24.6253	-0.350948	T0
24.6346	-0.350967	T0
24.6421	-0.350986	T0
24.6501	-0.351004	T0
24.6585	-0.35103	T0
24.6668	-0.351052	T0
24.6752	-0.351075	T0
24.6835	-0.351102	T0
24.6911	-0.351132	T0
24.6996	-0.351154	T0
24.7077	-0.351171	T0
24.7162	-0.351188	T0
24.7248	-0.351206	T0
24.7322	-0.35122	T0
24.7408	-0.351238	T0
24.7487	-0.351264	T0
24.7574	-0.351295	T0
24.7655	-0.351314	T0
24.7734	-0.351337	T0
24.7821	-0.351362	T0
24.7899	-0.351394	T0
24.7984	-0.351425	T0
24.8063	-0.351455	T0
24.8148	-0.351488	T0
24.8233	-0.351524	T0
24.832	-0.351555	T0
24.8401	-0.351588	T0
24.8475	-0.351612	T0
24.8562	-0.351636	T0
24.8643	-0.351656	T0
24.8723	-0.351672	T0
24.8807	-0.351684	T0
24.8891	-0.351704	T0
24.8972	-0.351715	T0
24.9053	-0.351725	T0
24.9141	-0.351738	T0
24.9224	-0.351755	T0
24.9302	-0.351778	T0
24.9388	-0.351803	T0
24.9472	-0.351826	T0
24.955	-0.351845	T0
24.9637	-0.351863	T0
24.9713	-0.351885	T0
24.9802	-0.351907	T0
24.9881	-0.35193	T0
24.9971	-0.351954	T0
25.0047	-0.351977	T0
25.0129	-0.351994	T0
25.0224	-0.352013	T0
25.0302	-0.352032	T0
25.0386	-0.352051	T0
25.0466	-0.352072	T0
25.0548	-0.35209	T0
25.0633	-0.352106	T0
25.0713	-0.352122	T0
25.0791	-0.352148	T0
25.0874	-0.352165	T0
25.096	-0.352181	T0
25.1041	-0.352195	T0
25.1124	-0.352208	T0
25.1203	-0.352219	T0
25.129	-0.352234	T0
25.1365	-0.352257	T0
25.1452	-0.352281	T0
25.1532	-0.352308	T0
25.1617	-0.352332	T0
25.1698	-0.35236	T0
25.1787	-0.352393	T0
25.187	-0.352429	T0
25.195	-0.35246	T0
25.2032	-0.352479	T0
25.2111	-0.352491	T0
25.22	-0.352504	T0
25.2276	-0.352519	T0
25.2358	-0.352524	T0
25.2443	-0.352531	T0
25.2526	-0.352542	T0
25.2611	-0.352554	T0
25.2702	-0.352565	T0
25.2778	-0.352578	T0
25.2862	-0.352591	T0
25.2937	-0.35261	T0
25.302	-0.352631	T0
25.3108	-0.352652	T0
25.3191	-0.352668	T0
25.3276	-0.352686	T0
25.3356	-0.352708	T0
25.3442	-0.352736	T0
25.3524	-0.352764	T0
25.3611	-0.352794	T0
25.3696	-0.352819	T0
25.3775	-0.35284	T0
25.3856	-0.352855	T0
25.3933	-0.352871	T0
25.4018	-0.352888	T0
25.4101	-0.352901	T0
25.4186	-0.352911	T0
25.4265	-0.352924	T0
25.435	-0.352934	T0
25.4434	-0.352943	T0
25.451	-0.352957	T0
25.4598	-0.352969	T0
25.4686	-0.352979	T0
25.477	-0.352992	T0
25.4845	-0.353004	T0
25.493	-0.353023	T0
25.5016	-0.353045	T0
25.5097	-0.353069	T0
25.518	-0.353099	T0
25.526	-0.353122	T0
25.5334	-0.353142	T0
25.5424	-0.353165	T0
25.5504	-0.353188	T0
25.559	-0.353213	T0
25.567	-0.353236	T0
25.5756	-0.353253	T0
25.5835	-0.353272	T0
25.5926	-0.353288	T0
25.5999	-0.353301	T0
25.6091	-0.353321	T0
25.6171	-0.353337	T0
25.6254	-0.353346	T0
25.6341	-0.353354	T0
25.6426	-0.353365	T0
25.6501	-0.353372	T0
25.6584	-0.353381	T0
25.6667	-0.353393	T0
25.675	-0.353404	T0
25.6832	-0.353419	T0
25.6919	-0.353434	T0
25.7005	-0.35345	T0
25.7089	-0.353467	T0
25.7169	-0.353484	T0
25.7252	-0.353497	T0
25.7336	-0.353511	T0
25.7418	-0.353522	T0
25.7501	-0.353533	T0
25.7586	-0.353543	T0
25.7668	-0.353553	T0
25.7746	-0.353562	T0
25.7839	-0.353575	T0
25.7917	-0.353585	T0
25.8	-0.353594	T0
25.8077	-0.353603	T0
25.8164	-0.353618	T0
25.8243	-0.353636	T0
25.8326	-0.353655	T0
25.8409	-0.353671	T0
25.85	-0.353689	T0
25.8589	-0.353714	T0
25.8662	-0.353733	T0
25.875	-0.353752	T0
25.883	-0.353768	T0
25.8909	-0.353782	T0
25.8999	-0.35379	T0
25.9077	-0.353802	T0
25.9159	-0.353809	T0
25.9245	-0.353817	T0
25.9323	-0.353824	T0
25.9407	-0.353833	T0
25.9497	-0.353841	T0
25.9577	-0.35385	T0
25.9656	-0.353859	T0
25.9741	-0.353867	T0
25.9821	-0.353875	T0
25.991	-0.353886	T0
25.9991	-0.353908	T0
26.0075	-0.353926	T0
26.0157	-0.353944	T0
26.024	-0.353959	T0
26.032	-0.353975	T0
26.0407	-0.353991	T0
26.0485	-0.354005	T0
26.0565	-0.35402	T0
26.0657	-0.354029	T0
26.0742	-0.354038	T0
26.082	-0.354046	T0
26.0902	-0.354055	T0
26.0985	-0.354065	T0
26.1068	-0.354078	T0
26.1154	-0.354094	T0
26.1239	-0.354111	T0
26.1318	-0.354124	T0
26.1402	-0.354133	T0
26.1488	-0.354142	T0
26.1564	-0.354154	T0
26.165	-0.354164	T0
26.1737	-0.354172	T0
26.1815	-0.35418	T0
26.1902	-0.354189	T0
26.1987	-0.354202	T0
26.2069	-0.35422	T0
26.2154	-0.354233	T0
26.2241	-0.354243	T0
26.2322	-0.354251	T0
26.2399	-0.35426	T0
26.2486	-0.354267	T0
26.2571	-0.354274	T0
26.2648	-0.354282	T0
26.2732	-0.354292	T0
26.2817	-0.3543	T0
26.2896	-0.354308	T0
26.2982	-0.354319	T0
26.3058	-0.35433	T0
26.3143	-0.354341	T0
26.3225	-0.354349	T0
26.3312	-0.354358	T0
26.3389	-0.354369	T0
26.3472	-0.35438	T0
26.3563	-0.354394	T0
26.3643	-0.354405	T0
26.373	-0.354415	T0
26.3809	-0.354429	T0
26.3896	-0.354442	T0
26.3981	-0.35445	T0
26.4062	-0.354458	T0
26.4151	-0.354466	T0
26.4228	-0.354473	T0
26.4313	-0.35448	T0
26.4398	-0.354487	T0
26.448	-0.354494	T0
26.4559	-0.354501	T0
26.4644	-0.354508	T0
26.4729	-0.354516	T0
26.4815	-0.354525	T0
26.4887	-0.354532	T0
26.4975	-0.354541	T0
26.5056	-0.354549	T0
26.5144	-0.354556	T0
26.5226	-0.354564	T0
26.5312	-0.354571	T0
26.5396	-0.354579	T0
26.548	-0.354587	T0
26.5556	-0.354594	T0
26.5639	-0.354602	T0
26.5726	-0.35461	T0
26.5806	-0.354618	T0
26.5889	-0.354626	T0
26.5978	-0.354638	T0
26.6057	-0.354648	T0
26.6145	-0.354659	T0
26.6223	-0.354668	T0
26.6314	-0.354677	T0
26.6389	-0.354685	T0
26.6476	-0.354692	T0
26.656	-0.354699	T0
26.6642	-0.354707	T0
26.6724	-0.354715	T0
26.6803	-0.354721	T0
26.6888	-0.35473	T0
26.6968	-0.354742	T0
26.7049	-0.354752	T0
26.7139	-0.354761	T0
26.7218	-0.354773	T0
26.7304	-0.354789	T0
26.739	-0.354803	T0
26.7471	-0.354816	T0
26.7551	-0.35483	T0
26.764	-0.35484	T0
26.772	-0.354846	T0
26.7804	-0.354854	T0
26.7889	-0.354861	T0
26.7977	-0.354868	T0
26.8059	-0.354876	T0
26.8137	-0.354883	T0
26.8224	-0.35489	T0
26.8306	-0.354897	T0
26.8388	-0.354904	T0
26.8475	-0.354911	T0
26.8552	-0.354918	T0
26.8633	-0.354927	T0
26.8714	-0.354936	T0
26.8801	-0.354948	T0
26.8878	-0.354957	T0
26.8973	-0.354965	T0
26.9049	-0.354972	T0
26.9135	-0.354979	T0
26.9215	-0.354985	T0
26.93	-0.354991	T0
26.9384	-0.354997	T0
26.9466	-0.355003	T0
26.9556	-0.355011	T0
26.9634	-0.355018	T0
26.9713	-0.355026	T0
26.9801	-0.355033	T0
26.9883	-0.35504	T0
26.9967	-0.355047	T0
27.0051	-0.355054	T0
27.0136	-0.355061	T0
27.0221	-0.355068	T0
27.0303	-0.355074	T0
27.0386	-0.355081	T0
27.0467	-0.355088	T0
27.0549	-0.355096	T0
27.0634	-0.355103	T0
27.0718	-0.35511	T0
27.0804	-0.355118	T0
27.0883	-0.355125	T0
27.0967	-0.355131	T0
27.1052	-0.355137	T0
27.1135	-0.355145	T0
27.1215	-0.355152	T0
27.1298	-0.355158	T0
27.1385	-0.355164	T0
27.1463	-0.35517	T0
27.1545	-0.355178	T0
27.1627	-0.355185	T0
27.1715	-0.355192	T0
27.1798	-0.355199	T0
27.1874	-0.355207	T0
27.1957	-0.355214	T0
27.2047	-0.355221	T0
27.213	-0.355228	T0
27.2213	-0.355236	T0
27.2296	-0.355243	T0
27.2379	-0.355249	T0
27.2464	-0.355256	T0
27.2549	-0.355263	T0
27.2627	-0.355271	T0
27.2716	-0.355282	T0
27.2797	-0.355294	T0
27.2883	-0.355304	T0
27.2968	-0.355313	T0
27.3046	-0.355319	T0
27.3126	-0.355326	T0
27.3211	-0.355333	T0
27.3295	-0.355339	T0
27.3377	-0.355346	T0
27.3469	-0.355354	T0
27.3547	-0.35536	T0
27.3628	-0.355366	T0
27.3715	-0.355372	T0
27.3799	-0.355377	T0
27.3884	-0.355383	T0
27.396	-0.355389	T0
27.4048	-0.355396	T0
27.4124	-0.355405	T0
27.4216	-0.355411	T0
27.4297	-0.355418	T0
27.4382	-0.355424	T0
27.4464	-0.355431	T0
27.4548	-0.355437	T0
27.4625	-0.355443	T0
27.4713	-0.355449	T0
27.4797	-0.355455	T0
27.488	-0.355461	T0
27.496	-0.355467	T0
27.5041	-0.355473	T0
27.5125	-0.35548	T0
27.521	-0.355486	T0
27.5294	-0.355492	T0
27.5375	-0.355498	T0
27.5463	-0.355504	T0
27.5549	-0.355509	T0
27.5629	-0.355515	T0
27.5712	-0.35552	T0
27.5799	-0.355525	T0
27.5878	-0.355531	T0
27.5961	-0.355537	T0
27.6042	-0.355545	T0
27.6127	-0.355554	T0
27.6209	-0.35556	T0
27.6292	-0.355566	T0
27.6373	-0.355572	T0
27.6454	-0.355578	T0
27.6539	-0.355583	T0
27.6623	-0.355588	T0
27.671	-0.355594	T0
27.6787	-0.355599	T0
27.6876	-0.355604	T0
27.6963	-0.355609	T0
27.7045	-0.355615	T0
27.7129	-0.35562	T0
27.7213	-0.355626	T0
27.7295	-0.355631	T0
27.7375	-0.355636	T0
27.7459	-0.355641	T0
27.7539	-0.355646	T0
27.7631	-0.355651	T0
27.7707	-0.355655	T0
27.7786	-0.355661	T0
27.7871	-0.355666	T0
27.7957	-0.355672	T0
27.8046	-0.355678	T0
27.8124	-0.355684	T0
27.821	-0.35569	T0
27.8289	-0.355696	T0
27.8378	-0.355701	T0
27.8455	-0.355706	T0
27.8544	-0.355711	T0
27.8629	-0.355715	T0
27.8707	-0.355719	T0
27.8794	-0.355723	T0
27.8879	-0.355726	T0
27.8959	-0.35573	T0
27.9041	-0.355734	T0
27.9126	-0.355737	T0
27.9208	-0.355742	T0
27.9291	-0.355746	T0
27.9375	-0.355751	T0
27.9456	-0.355757	T0
27.9542	-0.355762	T0
27.9621	-0.355768	T0
27.9709	-0.355774	T0
27.9789	-0.35578	T0
27.9878	-0.355785	T0
27.9959	-0.355791	T0
28.0047	-0.355796	T0
28.0126	-0.355801	T0
28.021	-0.355805	T0
28.0289	-0.355808	T0
28.0371	-0.355812	T0
28.0453	-0.355817	T0
28.0538	-0.35582	T0
28.0619	-0.355825	T0
28.0703	-0.355829	T0
28.0785	-0.355834	T0
28.0866	-0.355839	T0
28.0954	-0.355845	T0
28.1038	-0.35585	T0
28.1121	-0.355855	T0
28.1211	-0.355862	T0
28.1287	-0.355869	T0
28.1375	-0.355874	T0
28.1456	-0.355879	T0
28.1537	-0.355883	T0
28.1623	-0.355888	T0
28.1701	-0.355895	T0
28.1787	-0.3559	T0
28.1868	-0.355905	T0
28.196	-0.355911	T0
28.2042	-0.355915	T0
28.2123	-0.355919	T0
28.2212	-0.355924	T0
28.2293	-0.355928	T0
28.2377	-0.355932	T0
28.2455	-0.355936	T0
28.2538	-0.35594	T0
28.2627	-0.355945	T0
28.2706	-0.355949	T0
28.2794	-0.355954	T0
28.2874	-0.355958	T0
28.2958	-0.355963	T0
28.3042	-0.355967	T0
28.3123	-0.355972	T0
28.3207	-0.355976	T0
28.329	-0.355981	T0
28.3369	-0.355986	T0
28.3456	-0.355991	T0
28.3539	-0.355996	T0
28.3624	-0.356002	T0
28.3706	-0.356007	T0
28.3786	-0.356012	T0
28.3875	-0.356016	T0
28.3961	-0.356021	T0
28.4041	-0.356025	T0
28.4127	-0.35603	T0
28.4209	-0.356035	T0
28.4291	-0.35604	T0
28.4376	-0.356045	T0
28.4461	-0.356051	T0
28.4544	-0.356056	T0
28.4631	-0.356063	T0
28.4714	-0.356067	T0
28.4793	-0.356073	T0
28.4876	-0.356077	T0
28.4955	-0.356081	T0
28.504	-0.356086	T0
28.5119	-0.35609	T0
28.5206	-0.356095	T0
28.5293	-0.3561	T0
28.5373	-0.356105	T0
28.546	-0.35611	T0
28.5542	-0.356114	T0
28.5628	-0.356118	T0
28.5714	-0.356121	T0
28.5792	-0.356125	T0
28.5878	-0.356129	T0
28.596	-0.356133	T0
28.6044	-0.356137	T0
28.6123	-0.356142	T0
28.6213	-0.356147	T0
28.6295	-0.356152	T0
28.6375	-0.356158	T0
28.646	-0.356164	T0
28.6536	-0.35617	T0
28.6628	-0.356175	T0
28.6708	-0.35618	T0
28.6792	-0.356186	T0
28.6879	-0.356191	T0
28.6963	-0.356196	T0
28.7043	-0.356201	T0
28.7127	-0.356206	T0
28.7212	-0.356211	T0
28.73	-0.356215	T0
28.7379	-0.356218	T0
28.746	-0.356222	T0
28.7547	-0.356225	T0
28.7627	-0.356228	T0
28.7709	-0.356231	T0
28.7793	-0.356235	T0
28.7873	-0.356238	T0
28.7956	-0.356242	T0
28.8041	-0.356247	T0
28.8118	-0.356251	T0
28.8207	-0.356257	T0
28.8288	-0.356262	T0
28.8375	-0.356267	T0
28.8458	-0.356271	T0
28.8541	-0.356274	T0
28.8629	-0.356277	T0
28.871	-0.35628	T0
28.8792	-0.356283	T0
28.8878	-0.356286	T0
28.896	-0.356289	T0
28.9048	-0.356291	T0
28.9128	-0.356295	T0
28.9212	-0.356298	T0
28.9297	-0.356302	T0
28.9378	-0.356305	T0
28.9453	-0.356309	T0
28.9543	-0.356313	T0
28.9628	-0.356317	T0
28.9708	-0.356321	T0
28.9795	-0.356325	T0
28.9878	-0.356328	T0
28.9965	-0.356332	T0
29.0044	-0.356336	T0
29.013	-0.356339	T0
29.0215	-0.356342	T0
29.0291	-0.356345	T0
29.0374	-0.356347	T0
29.0458	-0.35635	T0
29.0546	-0.356353	T0
29.0629	-0.356356	T0
29.0704	-0.35636	T0
29.0791	-0.356363	T0
29.0879	-0.356366	T0
29.0963	-0.356369	T0
29.1046	-0.356376	T0
29.1127	-0.356383	T0
29.1211	-0.356387	T0
29.1295	-0.356391	T0
29.137	-0.356393	T0
29.1456	-0.356396	T0
29.1548	-0.356399	T0
29.1631	-0.356402	T0
29.1707	-0.356409	T0
29.1794	-0.356417	T0
29.1882	-0.356424	T0
29.1958	-0.356432	T0
29.2043	-0.356435	T0
29.2129	-0.356438	T0
29.2213	-0.356441	T0
29.2293	-0.356442	T0
29.2378	-0.356445	T0
29.2457	-0.356447	T0
29.2541	-0.35645	T0
29.2626	-0.356452	T0
29.2714	-0.356455	T0
29.2795	-0.356457	T0
29.2874	-0.356459	T0
29.2961	-0.356461	T0
29.3045	-0.356463	T0
29.3129	-0.356466	T0
29.3215	-0.356469	T0
29.3289	-0.356471	T0
29.3376	-0.356474	T0
29.3458	-0.356477	T0
29.3542	-0.35648	T0
29.3622	-0.356483	T0
29.3708	-0.356486	T0
29.3797	-0.356488	T0
29.3875	-0.356492	T0
29.3954	-0.356495	T0
29.4043	-0.356496	T0
29.4127	-0.356498	T0
29.4208	-0.3565	T0
29.4297	-0.356502	T0
29.4373	-0.356504	T0
29.4461	-0.356507	T0
29.4546	-0.35651	T0
29.4623	-0.356516	T0
29.4713	-0.35652	T0
29.4793	-0.356524	T0
29.4883	-0.356527	T0
29.4967	-0.356529	T0
29.5048	-0.356532	T0
29.5132	-0.356535	T0
29.5208	-0.356537	T0
29.53	-0.35654	T0
29.5379	-0.356544	T0
29.5457	-0.356548	T0
29.5543	-0.356554	T0
29.5627	-0.35656	T0
29.5708	-0.356562	T0
29.5796	-0.356565	T0
29.5877	-0.356566	T0
29.5963	-0.356568	T0
29.6048	-0.35657	T0
29.613	-0.356572	T0
29.6212	-0.356574	T0
29.6293	-0.356576	T0
29.638	-0.356579	T0
29.6463	-0.356581	T0
29.6545	-0.356585	T0
29.6631	-0.356588	T0
29.6709	-0.356591	T0
29.6798	-0.356593	T0
29.6883	-0.356595	T0
29.6962	-0.356597	T0
29.7051	-0.356598	T0
29.7127	-0.3566	T0
29.7214	-0.356601	T0
29.73	-0.356601	T0
29.7382	-0.356602	T0
29.7462	-0.356603	T0
29.7545	-0.356605	T0
29.7635	-0.356608	T0
29.7711	-0.356611	T0
29.7796	-0.356613	T0
29.7873	-0.356617	T0
29.7961	-0.356619	T0
29.8039	-0.356622	T0
29.8132	-0.356625	T0
29.8212	-0.356629	T0
29.83	-0.356633	T0
29.8381	-0.356637	T0
29.8467	-0.35664	T0
29.8546	-0.356643	T0
29.8633	-0.356646	T0
29.8712	-0.356649	T0
29.8797	-0.356652	T0
29.8883	-0.356654	T0
29.8967	-0.356657	T0
29.9044	-0.356659	T0
29.9129	-0.356663	T0
29.9207	-0.356666	T0
29.9297	-0.356669	T0
29.9384	-0.356672	T0
29.9465	-0.356675	T0
29.9548	-0.356677	T0
29.963	-0.356678	T0
29.9718	-0.35668	T0
29.98	-0.356681	T0
29.9881	-0.356682	T0
29.9968	-0.356683	T0
30.005	-0.356685	T0
30.0131	-0.356687	T0
30.021	-0.356689	T0
30.0304	-0.356691	T0
30.0383	-0.356692	T0
30.0466	-0.356694	T0
30.055	-0.356697	T0
30.0632	-0.356698	T0
30.0717	-0.356699	T0
30.0799	-0.356701	T0
30.0877	-0.356702	T0
30.0964	-0.356703	T0
30.1048	-0.356705	T0
30.1135	-0.356707	T0
30.1218	-0.356709	T0
30.1297	-0.356712	T0
30.1386	-0.356715	T0
30.1464	-0.356719	T0
30.1551	-0.356721	T0
30.1632	-0.356723	T0
30.1717	-0.356725	T0
30.1793	-0.356727	T0
30.1883	-0.356729	T0
30.1964	-0.356732	T0
30.2048	-0.356734	T0
30.2128	-0.356736	T0
30.2212	-0.356738	T0
30.2296	-0.356739	T0
30.2382	-0.356741	T0
30.2461	-0.356742	T0
30.2545	-0.356743	T0
30.2631	-0.356745	T0
30.2714	-0.356746	T0
30.28	-0.356748	T0
30.2878	-0.35675	T0
30.2964	-0.356753	T0
30.305	-0.356758	T0
30.3134	-0.356763	T0
30.3217	-0.356766	T0
30.3305	-0.356768	T0
30.3383	-0.35677	T0
30.3465	-0.356773	T0
30.3548	-0.356775	T0
30.3637	-0.356777	T0
30.3718	-0.356779	T0
30.3799	-0.356781	T0
30.3884	-0.356783	T0
30.3965	-0.356784	T0
30.4051	-0.356786	T0
30.4134	-0.356788	T0
30.4216	-0.35679	T0
30.4304	-0.356793	T0
30.4387	-0.356795	T0
30.4467	-0.356798	T0
30.4553	-0.3568	T0
30.4633	-0.356803	T0
30.4717	-0.356805	T0
30.48	-0.356807	T0
30.4883	-0.356809	T0
30.4966	-0.35681	T0
30.5047	-0.356812	T0
30.5134	-0.356814	T0
30.5216	-0.356816	T0
30.53	-0.356817	T0
30.5388	-0.356818	T0
30.5465	-0.35682	T0
30.5555	-0.356822	T0
30.5642	-0.356825	T0
30.5723	-0.356827	T0
30.5809	-0.356829	T0
30.5887	-0.356831	T0
30.5971	-0.356833	T0
30.6051	-0.356835	T0
30.6134	-0.356838	T0
30.622	-0.35684	T0
30.6301	-0.356841	T0
30.6384	-0.356843	T0
30.6472	-0.356844	T0
30.6551	-0.356846	T0
30.6638	-0.356848	T0
30.6728	-0.35685	T0
30.6805	-0.356852	T0
30.689	-0.356854	T0
30.6969	-0.356857	T0
30.7051	-0.35686	T0
30.7135	-0.356863	T0
30.7219	-0.356866	T0
30.7302	-0.356868	T0
30.7388	-0.35687	T0
30.747	-0.356872	T0
30.7557	-0.356874	T0
30.7632	-0.356876	T0
30.7717	-0.356878	T0
30.7803	-0.35688	T0
30.7883	-0.356881	T0
30.7973	-0.356883	T0
30.8062	-0.356886	T0
30.8142	-0.356889	T0
30.8227	-0.356891	T0
30.8304	-0.356892	T0
30.8395	-0.356894	T0
30.8474	-0.356896	T0
30.8553	-0.356897	T0
30.8633	-0.356899	T0
30.8723	-0.3569	T0
30.8806	-0.356902	T0
30.8887	-0.356904	T0
30.8971	-0.356906	T0
30.9054	-0.356909	T0
30.9143	-0.356912	T0
30.9224	-0.356915	T0
30.9308	-0.356917	T0
30.9389	-0.35692	T0
30.9475	-0.356923	T0
30.9558	-0.356925	T0
30.9641	-0.356928	T0
30.9723	-0.356929	T0
30.9811	-0.356931	T0
30.9894	-0.356933	T0
30.9977	-0.356934	T0
31.0061	-0.356936	T0
31.014	-0.356937	T0
31.0223	-0.356938	T0
31.0307	-0.356939	T0
31.039	-0.356939	T0
31.0472	-0.356939	T0
31.0551	-0.356938	T0
31.0636	-0.356937	T0
31.0724	-0.356937	T0
31.0811	-0.356937	T0
31.0891	-0.356938	T0
31.0975	-0.356939	T0
31.1061	-0.356941	T0
31.1143	-0.356945	T0
31.1226	-0.356952	T0
31.131	-0.356955	T0
31.139	-0.356958	T0
31.1471	-0.35696	T0
31.1557	-0.356962	T0
31.1639	-0.356963	T0
31.1721	-0.356965	T0
31.1809	-0.356966	T0
31.1887	-0.356967	T0
31.1978	-0.356968	T0
31.2059	-0.356969	T0
31.2143	-0.35697	T0
31.2228	-0.356971	T0
31.231	-0.356973	T0
31.2399	-0.356974	T0
31.2483	-0.356976	T0
31.2568	-0.356977	T0
31.2648	-0.356979	T0
31.273	-0.356979	T0
31.2816	-0.356979	T0
31.2897	-0.356979	T0
31.2983	-0.35698	T0
31.3063	-0.35698	T0
31.3151	-0.356981	T0
31.323	-0.356981	T0
31.3313	-0.356982	T0
31.3397	-0.356983	T0
31.3481	-0.356984	T0
31.3564	-0.356987	T0
31.3644	-0.356988	T0
31.373	-0.356989	T0
31.3813	-0.35699	T0
31.3896	-0.356991	T0
31.3978	-0.356992	T0
31.4067	-0.356992	T0
31.4145	-0.356993	T0
31.423	-0.356993	T0
31.4317	-0.356993	T0
31.4398	-0.356993	T0
31.4481	-0.356994	T0
31.4566	-0.356996	T0
31.4651	-0.356997	T0
31.4731	-0.356999	T0
31.4818	-0.357	T0
31.4897	-0.357001	T0
31.4981	-0.357003	T0
31.5062	-0.357004	T0
31.5147	-0.357005	T0
31.5231	-0.357005	T0
31.5311	-0.357005	T0
31.5394	-0.357005	T0
31.5477	-0.357005	T0
31.5566	-0.357006	T0
31.5647	-0.357006	T0
31.5735	-0.357005	T0
31.5813	-0.357005	T0
31.5899	-0.357006	T0
31.5985	-0.357007	T0
31.6065	-0.357008	T0
31.6151	-0.357009	T0
31.6231	-0.357009	T0
31.631	-0.357011	T0
31.6398	-0.357012	T0
31.648	-0.357014	T0
31.6564	-0.357015	T0
31.6648	-0.357016	T0
31.6729	-0.357017	T0
31.6817	-0.357017	T0
31.6896	-0.357019	T0
31.6982	-0.35702	T0
31.7067	-0.357021	T0
31.7151	-0.357021	T0
31.7229	-0.357022	T0
31.7312	-0.357022	T0
31.7402	-0.357023	T0
31.7482	-0.357023	T0
31.7562	-0.357024	T0
31.7649	-0.357024	T0
31.7727	-0.357025	T0
31.7812	-0.357026	T0
31.7896	-0.357028	T0
31.7979	-0.357029	T0
31.8067	-0.357031	T0
31.8152	-0.357032	T0
31.8234	-0.357034	T0
31.8315	-0.357036	T0
31.84	-0.357038	T0
31.8486	-0.357039	T0
31.857	-0.357041	T0
31.8651	-0.357042	T0
31.8736	-0.357044	T0
31.8816	-0.357045	T0
31.8903	-0.357045	T0
31.8984	-0.357046	T0
31.9069	-0.357047	T0
31.9149	-0.35705	T0
31.9239	-0.357053	T0
31.9315	-0.357056	T0
31.9397	-0.357058	T0
31.9482	-0.357059	T0
31.9565	-0.357061	T0
31.9653	-0.357063	T0
31.9738	-0.357064	T0
31.9823	-0.357065	T0
31.9904	-0.357066	T0
31.9982	-0.357067	T0
32.0067	-0.35707	T0
32.0149	-0.357072	T0
32.0237	-0.357077	T0
32.0317	-0.357083	T0
32.0407	-0.357087	T0
32.0484	-0.35709	T0
32.057	-0.357093	T0
32.0649	-0.357096	T0
32.0737	-0.357098	T0
32.0819	-0.357099	T0
32.0904	-0.3571	T0
32.0988	-0.357101	T0
32.1075	-0.357102	T0
32.1155	-0.357104	T0
32.1238	-0.357106	T0
32.1317	-0.357109	T0
32.1407	-0.357112	T0
32.1488	-0.357116	T0
32.1572	-0.35712	T0
32.1652	-0.357123	T0
32.174	-0.357125	T0
32.1823	-0.357128	T0
32.1903	-0.35713	T0
32.1988	-0.357131	T0
32.2073	-0.357133	T0
32.2156	-0.357135	T0
32.2238	-0.357137	T0
32.2321	-0.35714	T0
32.2402	-0.357141	T0
32.249	-0.357143	T0
32.2572	-0.357145	T0
32.2654	-0.357146	T0
32.2739	-0.357147	T0
32.2823	-0.357148	T0
32.2909	-0.35715	T0
32.2985	-0.357152	T0
32.3073	-0.357153	T0
32.3149	-0.357154	T0
32.3238	-0.357155	T0
32.3321	-0.357156	T0
32.3406	-0.357157	T0
32.3489	-0.357157	T0
32.3573	-0.357158	T0
32.3657	-0.357159	T0
32.374	-0.357161	T0
32.382	-0.357163	T0
32.3912	-0.357165	T0
32.3988	-0.357167	T0
32.4073	-0.35717	T0
32.4158	-0.357171	T0
32.4245	-0.357172	T0
32.4321	-0.357174	T0
32.4408	-0.357175	T0
32.4492	-0.357176	T0
32.4576	-0.357177	T0
32.466	-0.357177	T0
32.4744	-0.357179	T0
32.4822	-0.35718	T0
32.4908	-0.35718	T0
32.4989	-0.357181	T0
32.5072	-0.357181	T0
32.5159	-0.357182	T0
32.5241	-0.357182	T0
32.5321	-0.357183	T0
32.541	-0.357184	T0
32.549	-0.357184	T0
32.5576	-0.357186	T0
32.566	-0.357187	T0
32.5745	-0.357189	T0
32.5826	-0.357191	T0
32.5908	-0.357192	T0
32.5993	-0.357193	T0
32.6071	-0.357193	T0
32.6161	-0.357193	T0
32.6237	-0.357194	T0
32.6325	-0.357195	T0
32.6411	-0.357195	T0
32.6496	-0.357196	T0
32.6576	-0.357196	T0
32.6662	-0.357197	T0
32.6741	-0.357198	T0
32.6823	-0.357199	T0
32.6909	-0.357199	T0
32.6991	-0.357199	T0
32.7076	-0.357199	T0
32.7158	-0.357198	T0
32.7242	-0.357197	T0
32.7325	-0.357194	T0
32.7408	-0.357192	T0
32.7498	-0.357191	T0
32.7577	-0.35719	T0
32.7658	-0.357189	T0
32.774	-0.357187	T0
32.7827	-0.357185	T0
32.7913	-0.357184	T0
32.7995	-0.357183	T0
32.8073	-0.357181	T0
32.8158	-0.357181	T0
32.824	-0.35718	T0
32.8325	-0.35718	T0
32.8411	-0.357179	T0
32.8496	-0.357179	T0
32.8573	-0.357179	T0
32.8662	-0.357179	T0
32.874	-0.357179	T0
32.8834	-0.35718	T0
32.891	-0.357182	T0
32.8989	-0.357183	T0
32.9079	-0.357184	T0
32.916	-0.357184	T0
32.9241	-0.357185	T0
32.9325	-0.357184	T0
32.9407	-0.357183	T0
32.9496	-0.357182	T0
32.9578	-0.357181	T0
32.9659	-0.357181	T0
32.9744	-0.35718	T0
32.9825	-0.35718	T0
32.9912	-0.35718	T0
32.9995	-0.357179	T0
33.0083	-0.357179	T0
33.0164	-0.357179	T0
33.0244	-0.357177	T0
33.0329	-0.357177	T0
33.0413	-0.357178	T0
33.0492	-0.357178	T0
33.0578	-0.357177	T0
33.0662	-0.357177	T0
33.0751	-0.357177	T0
33.0828	-0.357176	T0
33.0917	-0.357175	T0
33.0997	-0.357174	T0
33.1081	-0.357173	T0
33.1164	-0.357172	T0
33.1248	-0.357172	T0
33.1335	-0.357171	T0
33.141	-0.357171	T0
33.1491	-0.357172	T0
33.1572	-0.357172	T0
33.1662	-0.357172	T0
33.1743	-0.357172	T0
33.1828	-0.357173	T0
33.1911	-0.357174	T0
33.2003	-0.357174	T0
33.2084	-0.357174	T0
33.2163	-0.357169	T0
33.2246	-0.357167	T0
33.2326	-0.357166	T0
33.2412	-0.357166	T0
33.2493	-0.357165	T0
33.2579	-0.357165	T0
33.2664	-0.357165	T0
33.2749	-0.357165	T0
33.2832	-0.357167	T0
33.2908	-0.357169	T0
33.2999	-0.35717	T0
33.3078	-0.357171	T0
33.3161	-0.357172	T0
33.3246	-0.357172	T0
33.3326	-0.357171	T0
33.3416	-0.357171	T0
33.3494	-0.357171	T0
33.3577	-0.357171	T0
33.366	-0.357171	T0
33.3747	-0.357172	T0
33.3832	-0.357172	T0
33.391	-0.357173	T0
33.3992	-0.357174	T0
33.4079	-0.357176	T0
33.4165	-0.357177	T0
33.4245	-0.357178	T0
33.4329	-0.357179	T0
33.4417	-0.357179	T0
33.4498	-0.357178	T0
33.4581	-0.357177	T0
33.4671	-0.357176	T0
33.4751	-0.357176	T0
33.4832	-0.357174	T0
33.4915	-0.357174	T0
33.5	-0.357174	T0
33.5079	-0.357176	T0
33.5163	-0.357178	T0
33.5247	-0.357179	T0
33.5329	-0.35718	T0
33.5421	-0.357181	T0
33.5501	-0.357181	T0
33.5586	-0.35718	T0
33.5659	-0.357179	T0
33.5747	-0.357178	T0
33.5834	-0.357177	T0
33.5916	-0.357177	T0
33.6001	-0.357178	T0
33.6076	-0.35718	T0
33.6167	-0.357182	T0
33.6253	-0.357183	T0
33.6337	-0.357186	T0
33.6422	-0.357188	T0
33.6506	-0.35719	T0
33.6584	-0.357191	T0
33.6668	-0.357192	T0
33.6745	-0.357192	T0
33.6834	-0.357192	T0
33.691	-0.357192	T0
33.6995	-0.357192	T0
33.7079	-0.357192	T0
33.7162	-0.357191	T0
33.7247	-0.357191	T0
33.7334	-0.357191	T0
33.7417	-0.357191	T0
33.7504	-0.357192	T0
33.7576	-0.357193	T0
33.7666	-0.357193	T0
33.7752	-0.357193	T0
33.7827	-0.357194	T0
33.7914	-0.357195	T0
33.7999	-0.357196	T0
33.8084	-0.357197	T0
33.8165	-0.357198	T0
33.8251	-0.357199	T0
33.8332	-0.3572	T0
33.8417	-0.357201	T0
33.8499	-0.357204	T0
33.8583	-0.357205	T0
33.8665	-0.357206	T0
33.875	-0.357206	T0
33.8834	-0.357207	T0
33.8921	-0.357207	T0
33.9003	-0.357208	T0
33.9084	-0.357209	T0
33.9163	-0.35721	T0
33.9257	-0.357211	T0
33.9328	-0.357212	T0
33.9419	-0.357214	T0
33.9501	-0.357215	T0
33.9587	-0.357217	T0
33.9669	-0.357217	T0
33.9754	-0.357218	T0
33.9835	-0.357219	T0
33.992	-0.357219	T0
34.0006	-0.35722	T0
34.0086	-0.35722	T0
34.0172	-0.35722	T0
34.0254	-0.35722	T0
34.0338	-0.35722	T0
34.0421	-0.357221	T0
34.0505	-0.357222	T0
34.0589	-0.357223	T0
34.0676	-0.357224	T0
34.0755	-0.357226	T0
34.0837	-0.357227	T0
34.0919	-0.357229	T0
34.1005	-0.357229	T0
34.1088	-0.35723	T0
34.117	-0.357231	T0
34.1254	-0.357233	T0
34.1336	-0.357235	T0
34.142	-0.357237	T0
34.1506	-0.35724	T0
34.1586	-0.357242	T0
34.1669	-0.357244	T0
34.1755	-0.357245	T0
34.1845	-0.357246	T0
34.1923	-0.357247	T0
34.2005	-0.357248	T0
34.2091	-0.357248	T0
34.2171	-0.357249	T0
34.2253	-0.35725	T0
34.2338	-0.357252	T0
34.2422	-0.357254	T0
34.2512	-0.357256	T0
34.2591	-0.357258	T0
34.2674	-0.357258	T0
34.2757	-0.357257	T0
34.2844	-0.357257	T0
34.2919	-0.357257	T0
34.3007	-0.357257	T0
34.3089	-0.357257	T0
34.3166	-0.357257	T0
34.3252	-0.357257	T0
34.3331	-0.357257	T0
34.3423	-0.357257	T0
34.3506	-0.357257	T0
34.3591	-0.357258	T0
34.367	-0.357259	T0
34.3755	-0.35726	T0
34.3843	-0.35726	T0
34.3928	-0.357261	T0
34.4008	-0.357262	T0
34.4091	-0.357263	T0
34.4178	-0.357263	T0
34.4259	-0.357263	T0
34.434	-0.357264	T0
34.4425	-0.357265	T0
34.4501	-0.357266	T0
34.459	-0.357267	T0
34.4673	-0.357268	T0
34.4755	-0.357269	T0
34.4845	-0.357269	T0
34.4922	-0.35727	T0
34.5012	-0.35727	T0
34.5091	-0.35727	T0
34.5179	-0.357272	T0
34.526	-0.357273	T0
34.5348	-0.357275	T0
34.5426	-0.357276	T0
34.5506	-0.357278	T0
34.5588	-0.357279	T0
34.5673	-0.357279	T0
34.5756	-0.35728	T0
34.5845	-0.35728	T0
34.5924	-0.357282	T0
34.6008	-0.357283	T0
34.6095	-0.357284	T0
34.6178	-0.357286	T0
34.6254	-0.357287	T0
34.6346	-0.357288	T0
34.6427	-0.357289	T0
34.6513	-0.35729	T0
34.6596	-0.357291	T0
34.6677	-0.357291	T0
34.6762	-0.357291	T0
34.6846	-0.357292	T0
34.6929	-0.357293	T0
34.7015	-0.357294	T0
34.7097	-0.357295	T0
34.7176	-0.357295	T0
34.7253	-0.357296	T0
34.7345	-0.357297	T0
34.7423	-0.357298	T0
34.7512	-0.357298	T0
34.7594	-0.357299	T0
34.7679	-0.3573	T0
34.7765	-0.357301	T0
34.7844	-0.357302	T0
34.7929	-0.357303	T0
34.8015	-0.357304	T0
34.8096	-0.357306	T0
34.8174	-0.357308	T0
34.8263	-0.357312	T0
34.8347	-0.357315	T0
34.8421	-0.357317	T0
34.8512	-0.357318	T0
34.8595	-0.35732	T0
34.8677	-0.35732	T0
34.876	-0.35732	T0
34.8846	-0.35732	T0
34.893	-0.357319	T0
34.9009	-0.357319	T0
34.9101	-0.357319	T0
34.918	-0.35732	T0
34.9265	-0.357321	T0
34.935	-0.357322	T0
34.9431	-0.357322	T0
34.952	-0.357323	T0
34.96	-0.357324	T0
34.9679	-0.357325	T0
34.9766	-0.357326	T0
34.9849	-0.357326	T0
34.9933	-0.357327	T0
35.0015	-0.357328	T0
35.0094	-0.357328	T0
35.0182	-0.357329	T0
35.027	-0.35733	T0
35.035	-0.357331	T0
35.0433	-0.357332	T0
35.0518	-0.357333	T0
35.0601	-0.357335	T0
35.0682	-0.357337	T0
35.0763	-0.357339	T0
35.0848	-0.35734	T0
35.0927	-0.357341	T0
35.1013	-0.357343	T0
35.1093	-0.357344	T0
35.1187	-0.357344	T0
35.127	-0.357345	T0
35.1351	-0.357346	T0
35.1435	-0.357347	T0
35.1518	-0.357349	T0
35.1599	-0.35735	T0
35.1683	-0.357352	T0
35.1763	-0.357353	T0
35.1852	-0.357354	T0
35.1936	-0.357355	T0
35.2016	-0.357357	T0
35.2101	-0.357358	T0
35.2185	-0.357359	T0
35.227	-0.357361	T0
[truncated: 21,830 more rows]

## Sheet: BSA_Sucrose
Temperature	Heat Flow (Normalized)	Sample
20.0198	-0.0152983	S0
20.0194	-0.0152982	S0
20.02	-0.0152984	S0
20.0197	-0.0152981	S0
20.0197	-0.0152977	S0
20.0198	-0.0152975	S0
20.0202	-0.0152972	S0
20.0193	-0.0152971	S0
20.0202	-0.015297	S0
20.0188	-0.0152968	S0
20.0189	-0.0152967	S0
20.0199	-0.0152965	S0
20.0199	-0.0152966	S0
20.0195	-0.0152964	S0
20.0203	-0.0152961	S0
20.0197	-0.0152958	S0
20.0198	-0.0152959	S0
20.021	-0.0152963	S0
20.0212	-0.0152967	S0
20.0215	-0.0152974	S0
20.0202	-0.0152982	S0
20.0212	-0.015299	S0
20.0211	-0.0153001	S0
20.0218	-0.015302	S0
20.0218	-0.0153042	S0
20.0223	-0.0153066	S0
20.0227	-0.0153098	S0
20.0227	-0.0153182	S0
20.0233	-0.0153302	S0
20.0239	-0.0153475	S0
20.0235	-0.0153685	S0
20.024	-0.0154023	S0
20.0237	-0.0154473	S0
20.0246	-0.0155111	S0
20.0255	-0.0156027	S0
20.026	-0.0157208	S0
20.026	-0.0158732	S0
20.0275	-0.0160744	S0
20.0274	-0.0163363	S0
20.0282	-0.0166488	S0
20.0288	-0.0169958	S0
20.0287	-0.0173556	S0
20.0299	-0.0177496	S0
20.0297	-0.0181953	S0
20.0304	-0.0187087	S0
20.0315	-0.0191957	S0
20.0326	-0.0197365	S0
20.0329	-0.020259	S0
20.0342	-0.0207557	S0
20.0357	-0.0212837	S0
20.0367	-0.0217511	S0
20.0373	-0.022241	S0
20.0386	-0.0227318	S0
20.0398	-0.0233428	S0
20.0408	-0.0239045	S0
20.0416	-0.0245055	S0
20.0427	-0.0251297	S0
20.0445	-0.025802	S0
20.045	-0.0264814	S0
20.0464	-0.0272405	S0
20.048	-0.0280247	S0
20.0497	-0.0288467	S0
20.0512	-0.0296811	S0
20.0523	-0.0305368	S0
20.0538	-0.0313915	S0
20.0557	-0.0322952	S0
20.0574	-0.0332405	S0
20.0591	-0.0341694	S0
20.0611	-0.0351201	S0
20.0624	-0.0361116	S0
20.0644	-0.0371447	S0
20.0669	-0.0382225	S0
20.0686	-0.0393264	S0
20.0705	-0.0404109	S0
20.0724	-0.0415837	S0
20.0747	-0.04269	S0
20.0768	-0.0438725	S0
20.0793	-0.0451145	S0
20.0817	-0.0463739	S0
20.0833	-0.0476151	S0
20.0852	-0.048921	S0
20.088	-0.0502361	S0
20.0904	-0.0516107	S0
20.0932	-0.0529881	S0
20.0956	-0.0543372	S0
20.0983	-0.0557372	S0
20.1006	-0.05713	S0
20.1029	-0.0585184	S0
20.106	-0.059937	S0
20.1079	-0.0613634	S0
20.1113	-0.0628174	S0
20.1136	-0.064336	S0
20.1165	-0.0658714	S0
20.1197	-0.0673868	S0
20.1223	-0.0689729	S0
20.1258	-0.0705202	S0
20.1289	-0.0721378	S0
20.1319	-0.0737473	S0
20.1357	-0.0753598	S0
20.1382	-0.0769825	S0
20.1419	-0.0785555	S0
20.1451	-0.0801228	S0
20.1477	-0.0817316	S0
20.1512	-0.0833314	S0
20.1543	-0.084876	S0
20.1576	-0.086473	S0
20.1615	-0.0881023	S0
20.165	-0.0897301	S0
20.1681	-0.0913744	S0
20.1714	-0.0930377	S0
20.1756	-0.0947515	S0
20.1793	-0.0964239	S0
20.1832	-0.0980935	S0
20.1865	-0.0997512	S0
20.1912	-0.101394	S0
20.1946	-0.103036	S0
20.1981	-0.104662	S0
20.2023	-0.106278	S0
20.2053	-0.107933	S0
20.2092	-0.10955	S0
20.2138	-0.111161	S0
20.2179	-0.112742	S0
20.2222	-0.114269	S0
20.2256	-0.115894	S0
20.2296	-0.117524	S0
20.2341	-0.119125	S0
20.2378	-0.120746	S0
20.2423	-0.122341	S0
20.2464	-0.124027	S0
20.2509	-0.125586	S0
20.2549	-0.127182	S0
20.259	-0.128755	S0
20.2636	-0.130269	S0
20.2682	-0.131748	S0
20.2725	-0.133261	S0
20.2766	-0.134794	S0
20.2814	-0.136359	S0
20.2861	-0.137919	S0
20.2907	-0.139407	S0
20.2948	-0.140918	S0
20.3007	-0.142394	S0
20.3037	-0.143933	S0
20.3084	-0.14545	S0
20.3135	-0.14691	S0
20.318	-0.148328	S0
20.3226	-0.149758	S0
20.3272	-0.151254	S0
20.3319	-0.152691	S0
20.3367	-0.154087	S0
20.3421	-0.155428	S0
20.3462	-0.156828	S0
20.3508	-0.158156	S0
20.356	-0.159489	S0
20.3616	-0.160851	S0
20.3664	-0.16224	S0
20.3714	-0.163632	S0
20.3761	-0.16496	S0
20.381	-0.166384	S0
20.3862	-0.167672	S0
20.3914	-0.168933	S0
20.3965	-0.170249	S0
20.4012	-0.171578	S0
20.4058	-0.172866	S0
20.411	-0.174148	S0
20.4161	-0.175432	S0
20.422	-0.176731	S0
20.4275	-0.178009	S0
20.4322	-0.179202	S0
20.4375	-0.180473	S0
20.4427	-0.181636	S0
20.4487	-0.182779	S0
20.454	-0.183895	S0
20.4584	-0.185038	S0
20.4641	-0.186178	S0
20.469	-0.187391	S0
20.4737	-0.188617	S0
20.4802	-0.189901	S0
20.4853	-0.191089	S0
20.4911	-0.192276	S0
20.4962	-0.193434	S0
20.5018	-0.194586	S0
20.5072	-0.19571	S0
20.5126	-0.196794	S0
20.5186	-0.197758	S0
20.5236	-0.198794	S0
20.5291	-0.199929	S0
20.5355	-0.201001	S0
20.5411	-0.20211	S0
20.5463	-0.20324	S0
20.5521	-0.204284	S0
20.5582	-0.205298	S0
20.5636	-0.206315	S0
20.5696	-0.207317	S0
20.5753	-0.208344	S0
20.5805	-0.209288	S0
20.5864	-0.210288	S0
20.5921	-0.21131	S0
20.5979	-0.21233	S0
20.6044	-0.213317	S0
20.6095	-0.214343	S0
20.6155	-0.215311	S0
20.6212	-0.216374	S0
20.6273	-0.217375	S0
20.6329	-0.218298	S0
20.6393	-0.219228	S0
20.6453	-0.220107	S0
20.6511	-0.221044	S0
20.657	-0.221944	S0
20.6628	-0.222889	S0
20.6694	-0.223803	S0
20.675	-0.224727	S0
20.681	-0.22558	S0
20.6871	-0.226521	S0
20.6931	-0.22739	S0
20.6993	-0.228338	S0
20.7047	-0.229256	S0
20.7111	-0.230128	S0
20.7171	-0.230995	S0
20.7239	-0.231813	S0
20.7296	-0.232651	S0
20.7359	-0.233483	S0
20.7425	-0.234365	S0
20.7488	-0.235152	S0
20.7552	-0.235943	S0
20.7614	-0.236755	S0
20.7675	-0.237607	S0
20.7735	-0.238388	S0
20.7794	-0.239237	S0
20.7858	-0.240029	S0
20.7921	-0.240779	S0
20.7982	-0.241616	S0
20.8045	-0.242401	S0
20.8112	-0.243213	S0
20.818	-0.244	S0
20.8241	-0.244766	S0
20.8306	-0.245522	S0
20.8367	-0.24629	S0
20.8427	-0.247025	S0
20.8499	-0.247761	S0
20.8562	-0.248436	S0
20.862	-0.249181	S0
20.8692	-0.249912	S0
20.876	-0.250648	S0
20.8822	-0.251362	S0
20.8878	-0.252102	S0
20.8945	-0.252821	S0
20.9009	-0.253536	S0
20.9077	-0.254242	S0
20.9143	-0.254956	S0
20.921	-0.255677	S0
20.9273	-0.256307	S0
20.9345	-0.256996	S0
20.9409	-0.257612	S0
20.9475	-0.25833	S0
20.9542	-0.259016	S0
20.9604	-0.259786	S0
20.9668	-0.260468	S0
20.9743	-0.261155	S0
20.9806	-0.261777	S0
20.9874	-0.262409	S0
20.9941	-0.263079	S0
21.0005	-0.263678	S0
21.0072	-0.264228	S0
21.0142	-0.264778	S0
21.0203	-0.265382	S0
21.0274	-0.266038	S0
21.0345	-0.266655	S0
21.0408	-0.267285	S0
21.0483	-0.267938	S0
21.0545	-0.268544	S0
21.061	-0.269158	S0
21.0681	-0.269778	S0
21.0745	-0.270392	S0
21.0815	-0.270988	S0
21.0884	-0.271539	S0
21.0954	-0.272114	S0
21.102	-0.272665	S0
21.1089	-0.273177	S0
21.1161	-0.273759	S0
21.1231	-0.274309	S0
21.1297	-0.274789	S0
21.137	-0.275391	S0
21.1437	-0.275939	S0
21.1506	-0.276488	S0
21.1573	-0.277017	S0
21.1647	-0.277535	S0
21.1714	-0.278095	S0
21.1785	-0.278627	S0
21.1854	-0.279137	S0
21.1927	-0.279681	S0
21.1997	-0.280225	S0
21.2062	-0.280739	S0
21.2137	-0.281194	S0
21.2197	-0.28163	S0
21.2272	-0.282163	S0
21.234	-0.282626	S0
21.2412	-0.283153	S0
21.2484	-0.283602	S0
21.255	-0.284084	S0
21.2628	-0.284615	S0
21.2694	-0.2852	S0
21.2765	-0.285703	S0
21.284	-0.286168	S0
21.2911	-0.286565	S0
21.2978	-0.286969	S0
21.3051	-0.287474	S0
21.312	-0.287985	S0
21.3188	-0.288459	S0
21.3258	-0.288877	S0
21.3325	-0.289322	S0
21.3405	-0.289785	S0
21.3475	-0.290306	S0
21.3547	-0.290752	S0
21.3621	-0.291171	S0
21.3695	-0.291641	S0
21.3759	-0.292033	S0
21.3846	-0.292484	S0
21.3909	-0.292928	S0
21.3982	-0.293307	S0
21.4052	-0.293744	S0
21.4122	-0.294184	S0
21.4194	-0.294546	S0
21.4273	-0.294985	S0
21.4343	-0.295351	S0
21.4412	-0.295838	S0
21.4484	-0.296268	S0
21.4552	-0.296686	S0
21.4632	-0.297096	S0
21.4705	-0.297493	S0
21.4778	-0.29788	S0
21.4852	-0.298255	S0
21.4924	-0.298711	S0
21.4998	-0.299131	S0
21.5069	-0.299549	S0
21.5145	-0.299854	S0
21.522	-0.300209	S0
21.5294	-0.300532	S0
21.5368	-0.300831	S0
21.5443	-0.301171	S0
21.5511	-0.301467	S0
21.5584	-0.30182	S0
21.5659	-0.302156	S0
21.5732	-0.302571	S0
21.5809	-0.303026	S0
21.5881	-0.303467	S0
21.5954	-0.303843	S0
21.6024	-0.3042	S0
21.6101	-0.304548	S0
21.6174	-0.304949	S0
21.6251	-0.305299	S0
21.6326	-0.305601	S0
21.6399	-0.305901	S0
21.6471	-0.30627	S0
21.6553	-0.306569	S0
21.6624	-0.306925	S0
21.6697	-0.307253	S0
21.6773	-0.307598	S0
21.6849	-0.307868	S0
21.6926	-0.308205	S0
21.7003	-0.308467	S0
21.7072	-0.308744	S0
21.7157	-0.309053	S0
21.7223	-0.309375	S0
21.7293	-0.30967	S0
21.7372	-0.309938	S0
21.7444	-0.310219	S0
21.7524	-0.310584	S0
21.7599	-0.310945	S0
21.7673	-0.31128	S0
21.7745	-0.311654	S0
21.7824	-0.311949	S0
21.79	-0.312214	S0
21.7975	-0.31249	S0
21.8044	-0.31276	S0
21.8127	-0.313035	S0
21.8196	-0.313261	S0
21.8275	-0.313478	S0
21.8348	-0.313738	S0
21.8429	-0.314055	S0
21.8499	-0.314355	S0
21.8583	-0.314628	S0
21.8649	-0.314836	S0
21.8731	-0.315137	S0
21.8806	-0.315437	S0
21.8875	-0.315719	S0
21.8958	-0.315998	S0
21.9032	-0.316316	S0
21.9107	-0.316519	S0
21.9186	-0.316744	S0
21.9266	-0.316957	S0
21.9346	-0.317298	S0
21.9419	-0.317533	S0
21.9492	-0.31776	S0
21.957	-0.317993	S0
21.9649	-0.318227	S0
21.9722	-0.318484	S0
21.9798	-0.318793	S0
21.9868	-0.319073	S0
21.9951	-0.319294	S0
22.0021	-0.319549	S0
22.0102	-0.319711	S0
22.0177	-0.319954	S0
22.0259	-0.320207	S0
22.0332	-0.320463	S0
22.0413	-0.320628	S0
22.0486	-0.320884	S0
22.0567	-0.321098	S0
22.0646	-0.321321	S0
22.0725	-0.3215	S0
22.0795	-0.321735	S0
22.0874	-0.321933	S0
22.0957	-0.322239	S0
22.1027	-0.322446	S0
22.1103	-0.322674	S0
22.1185	-0.322898	S0
22.1264	-0.323158	S0
22.1337	-0.323428	S0
22.1414	-0.323623	S0
22.1493	-0.323847	S0
22.1569	-0.324064	S0
22.1644	-0.324212	S0
22.1728	-0.324453	S0
22.1802	-0.324735	S0
22.188	-0.324982	S0
22.1959	-0.325175	S0
22.2035	-0.32529	S0
22.2114	-0.325408	S0
22.2186	-0.325504	S0
22.2274	-0.325618	S0
22.2343	-0.325798	S0
22.242	-0.325943	S0
22.2499	-0.32611	S0
22.2579	-0.326308	S0
22.266	-0.326588	S0
22.2732	-0.32692	S0
22.2813	-0.327162	S0
22.289	-0.327286	S0
22.2971	-0.327423	S0
22.3051	-0.327554	S0
22.3128	-0.327738	S0
22.3199	-0.328031	S0
22.3281	-0.328202	S0
22.336	-0.328425	S0
22.3437	-0.32855	S0
22.3517	-0.328807	S0
22.3598	-0.329023	S0
22.3676	-0.329137	S0
22.3752	-0.329307	S0
22.3833	-0.329391	S0
22.3913	-0.329458	S0
22.3986	-0.329625	S0
22.4061	-0.329831	S0
22.4142	-0.330059	S0
22.4223	-0.330256	S0
22.4302	-0.330345	S0
22.4382	-0.330506	S0
22.4458	-0.330694	S0
22.454	-0.330838	S0
22.4613	-0.330996	S0
22.4696	-0.331098	S0
22.4774	-0.331209	S0
22.4852	-0.331296	S0
22.4932	-0.331411	S0
22.501	-0.331556	S0
22.5084	-0.3317	S0
22.5169	-0.331906	S0
22.5244	-0.332096	S0
22.5318	-0.332265	S0
22.5401	-0.332452	S0
22.5478	-0.332641	S0
22.5558	-0.332836	S0
22.5637	-0.332998	S0
22.5717	-0.333168	S0
22.5799	-0.333296	S0
22.5872	-0.333413	S0
22.5963	-0.333477	S0
22.6039	-0.333567	S0
22.6119	-0.333678	S0
22.6196	-0.333795	S0
22.627	-0.33395	S0
22.6351	-0.334092	S0
22.6426	-0.334229	S0
22.6509	-0.334385	S0
22.659	-0.334572	S0
22.6667	-0.334754	S0
22.675	-0.334942	S0
22.6826	-0.335129	S0
22.6912	-0.335285	S0
22.6991	-0.335424	S0
22.7069	-0.335571	S0
22.7149	-0.335696	S0
22.7229	-0.335814	S0
22.7307	-0.335924	S0
22.7386	-0.336058	S0
22.7462	-0.336178	S0
22.755	-0.336266	S0
22.7625	-0.336328	S0
22.77	-0.336413	S0
22.7779	-0.336474	S0
22.7861	-0.336563	S0
22.7937	-0.336682	S0
22.8018	-0.336773	S0
22.81	-0.336892	S0
22.8184	-0.337035	S0
22.8258	-0.337206	S0
22.8341	-0.337366	S0
22.8419	-0.337507	S0
22.8496	-0.337627	S0
22.8579	-0.337765	S0
22.8663	-0.337858	S0
22.8737	-0.337928	S0
22.882	-0.338001	S0
22.8899	-0.338092	S0
22.8981	-0.338179	S0
22.9063	-0.338254	S0
22.9141	-0.338346	S0
22.9218	-0.338446	S0
22.9302	-0.338592	S0
22.9377	-0.338785	S0
22.946	-0.338969	S0
22.9542	-0.339138	S0
22.9618	-0.33929	S0
22.9704	-0.339421	S0
22.9784	-0.339558	S0
22.9862	-0.339652	S0
22.9945	-0.339717	S0
23.0029	-0.339769	S0
23.0105	-0.339817	S0
23.0188	-0.339893	S0
23.0257	-0.339996	S0
23.0345	-0.340077	S0
23.0418	-0.340149	S0
23.0503	-0.340235	S0
23.0586	-0.340332	S0
23.0663	-0.340453	S0
23.074	-0.340568	S0
23.0825	-0.340666	S0
23.0905	-0.340747	S0
23.0986	-0.340862	S0
23.1067	-0.341001	S0
23.115	-0.341149	S0
23.1229	-0.341266	S0
23.1312	-0.341376	S0
23.1389	-0.341443	S0
23.1467	-0.341529	S0
23.1548	-0.341598	S0
23.1632	-0.341672	S0
23.171	-0.34175	S0
23.1787	-0.341809	S0
23.1873	-0.341891	S0
23.195	-0.341969	S0
23.2037	-0.342045	S0
23.2118	-0.342182	S0
23.2195	-0.342308	S0
23.2277	-0.342437	S0
23.2357	-0.342579	S0
23.2436	-0.342707	S0
23.2518	-0.342816	S0
23.2604	-0.342936	S0
23.2683	-0.343036	S0
23.276	-0.343099	S0
23.2839	-0.343122	S0
23.2925	-0.343146	S0
23.3008	-0.343179	S0
23.3094	-0.343225	S0
23.3171	-0.343306	S0
23.325	-0.343416	S0
23.3329	-0.343541	S0
23.3414	-0.343678	S0
23.3489	-0.343804	S0
23.3573	-0.343912	S0
23.365	-0.343984	S0
23.3732	-0.344051	S0
23.3814	-0.344089	S0
23.3902	-0.34411	S0
23.3981	-0.344132	S0
23.4061	-0.344162	S0
23.4143	-0.344203	S0
23.4223	-0.344255	S0
23.4301	-0.344332	S0
23.4383	-0.344417	S0
23.4464	-0.344521	S0
23.4548	-0.344635	S0
23.4625	-0.344756	S0
23.4709	-0.34485	S0
23.479	-0.344935	S0
23.4874	-0.345008	S0
23.4949	-0.345063	S0
23.5036	-0.345103	S0
23.5117	-0.345138	S0
23.5197	-0.345174	S0
23.5287	-0.345218	S0
23.5361	-0.345266	S0
23.5442	-0.345331	S0
23.5522	-0.345402	S0
23.5602	-0.34547	S0
23.5686	-0.345541	S0
23.5768	-0.34562	S0
23.5843	-0.345706	S0
23.5935	-0.345806	S0
23.6012	-0.34588	S0
23.6095	-0.345943	S0
23.6176	-0.346012	S0
23.6252	-0.346073	S0
23.6338	-0.346116	S0
23.6415	-0.346144	S0
23.6498	-0.346173	S0
23.6575	-0.346211	S0
23.6659	-0.346263	S0
23.6739	-0.34631	S0
23.6829	-0.346372	S0
23.6911	-0.346437	S0
23.6988	-0.3465	S0
23.7068	-0.346563	S0
23.7148	-0.346623	S0
23.7236	-0.346676	S0
23.7311	-0.346727	S0
23.7394	-0.346782	S0
23.7476	-0.346837	S0
23.7549	-0.346896	S0
23.7633	-0.346943	S0
23.7721	-0.346982	S0
23.7804	-0.347023	S0
23.7887	-0.347066	S0
23.7966	-0.347107	S0
23.8048	-0.347159	S0
23.8133	-0.347217	S0
23.8207	-0.347269	S0
23.8293	-0.347317	S0
23.8375	-0.347375	S0
23.8454	-0.34744	S0
23.8537	-0.347528	S0
23.8622	-0.347597	S0
23.8705	-0.347645	S0
23.8786	-0.347684	S0
23.8869	-0.347731	S0
23.8951	-0.347777	S0
23.9023	-0.347822	S0
23.9112	-0.347866	S0
23.9192	-0.347916	S0
23.9269	-0.347964	S0
23.935	-0.34801	S0
23.9433	-0.348065	S0
23.9516	-0.348128	S0
23.96	-0.348176	S0
23.9688	-0.348211	S0
23.9768	-0.348247	S0
23.985	-0.34828	S0
23.9935	-0.348325	S0
24.0013	-0.34837	S0
24.0092	-0.348402	S0
24.0172	-0.348437	S0
24.0253	-0.348472	S0
24.034	-0.348517	S0
24.0418	-0.348549	S0
24.0499	-0.348582	S0
24.0585	-0.348614	S0
24.0669	-0.34865	S0
24.0751	-0.348686	S0
24.0828	-0.348727	S0
24.0914	-0.348777	S0
24.0992	-0.348828	S0
24.1079	-0.348887	S0
24.116	-0.348954	S0
24.124	-0.34901	S0
24.1325	-0.349051	S0
24.1405	-0.34909	S0
24.1487	-0.349133	S0
24.157	-0.349177	S0
24.1656	-0.349215	S0
24.1739	-0.34925	S0
24.182	-0.349286	S0
24.1896	-0.349324	S0
24.1975	-0.349368	S0
24.2057	-0.349409	S0
24.2145	-0.349448	S0
24.2217	-0.349473	S0
24.2302	-0.349497	S0
24.239	-0.349524	S0
24.247	-0.34956	S0
24.256	-0.349606	S0
24.2631	-0.349659	S0
24.2718	-0.349703	S0
24.2798	-0.349743	S0
24.2882	-0.349778	S0
24.2964	-0.349814	S0
24.3045	-0.349843	S0
24.3124	-0.349867	S0
24.3208	-0.349886	S0
24.3294	-0.349903	S0
24.3376	-0.349923	S0
24.3459	-0.349942	S0
24.3543	-0.349975	S0
24.3623	-0.350008	S0
24.3704	-0.350039	S0
24.3788	-0.350068	S0
24.3868	-0.350102	S0
24.3951	-0.350155	S0
24.4032	-0.3502	S0
24.4114	-0.35023	S0
24.4199	-0.350256	S0
24.4277	-0.350284	S0
24.436	-0.350305	S0
24.4445	-0.350331	S0
24.4528	-0.350351	S0
24.4607	-0.350371	S0
24.4694	-0.350395	S0
24.4775	-0.350417	S0
24.4857	-0.350435	S0
24.4935	-0.350458	S0
24.5019	-0.350485	S0
24.5098	-0.350517	S0
24.5189	-0.350553	S0
24.5262	-0.350581	S0
24.5351	-0.350618	S0
24.543	-0.350656	S0
24.5511	-0.350688	S0
24.5594	-0.350721	S0
24.5677	-0.350757	S0
24.5761	-0.350795	S0
24.5839	-0.350828	S0
24.5921	-0.350863	S0
24.6004	-0.350896	S0
24.6087	-0.350921	S0
24.6169	-0.350935	S0
24.6253	-0.350948	S0
24.6346	-0.350967	S0
24.6421	-0.350986	S0
24.6501	-0.351004	S0
24.6585	-0.35103	S0
24.6668	-0.351052	S0
24.6752	-0.351075	S0
24.6835	-0.351102	S0
24.6911	-0.351132	S0
24.6996	-0.351154	S0
24.7077	-0.351171	S0
24.7162	-0.351188	S0
24.7248	-0.351206	S0
24.7322	-0.35122	S0
24.7408	-0.351238	S0
24.7487	-0.351264	S0
24.7574	-0.351295	S0
24.7655	-0.351314	S0
24.7734	-0.351337	S0
24.7821	-0.351362	S0
24.7899	-0.351394	S0
24.7984	-0.351425	S0
24.8063	-0.351455	S0
24.8148	-0.351488	S0
24.8233	-0.351524	S0
24.832	-0.351555	S0
24.8401	-0.351588	S0
24.8475	-0.351612	S0
24.8562	-0.351636	S0
24.8643	-0.351656	S0
24.8723	-0.351672	S0
24.8807	-0.351684	S0
24.8891	-0.351704	S0
24.8972	-0.351715	S0
24.9053	-0.351725	S0
24.9141	-0.351738	S0
24.9224	-0.351755	S0
24.9302	-0.351778	S0
24.9388	-0.351803	S0
24.9472	-0.351826	S0
24.955	-0.351845	S0
24.9637	-0.351863	S0
24.9713	-0.351885	S0
24.9802	-0.351907	S0
24.9881	-0.35193	S0
24.9971	-0.351954	S0
25.0047	-0.351977	S0
25.0129	-0.351994	S0
25.0224	-0.352013	S0
25.0302	-0.352032	S0
25.0386	-0.352051	S0
25.0466	-0.352072	S0
25.0548	-0.35209	S0
25.0633	-0.352106	S0
25.0713	-0.352122	S0
25.0791	-0.352148	S0
25.0874	-0.352165	S0
25.096	-0.352181	S0
25.1041	-0.352195	S0
25.1124	-0.352208	S0
25.1203	-0.352219	S0
25.129	-0.352234	S0
25.1365	-0.352257	S0
25.1452	-0.352281	S0
25.1532	-0.352308	S0
25.1617	-0.352332	S0
25.1698	-0.35236	S0
25.1787	-0.352393	S0
25.187	-0.352429	S0
25.195	-0.35246	S0
25.2032	-0.352479	S0
25.2111	-0.352491	S0
25.22	-0.352504	S0
25.2276	-0.352519	S0
25.2358	-0.352524	S0
25.2443	-0.352531	S0
25.2526	-0.352542	S0
25.2611	-0.352554	S0
25.2702	-0.352565	S0
25.2778	-0.352578	S0
25.2862	-0.352591	S0
25.2937	-0.35261	S0
25.302	-0.352631	S0
25.3108	-0.352652	S0
25.3191	-0.352668	S0
25.3276	-0.352686	S0
25.3356	-0.352708	S0
25.3442	-0.352736	S0
25.3524	-0.352764	S0
25.3611	-0.352794	S0
25.3696	-0.352819	S0
25.3775	-0.35284	S0
25.3856	-0.352855	S0
25.3933	-0.352871	S0
25.4018	-0.352888	S0
25.4101	-0.352901	S0
25.4186	-0.352911	S0
25.4265	-0.352924	S0
25.435	-0.352934	S0
25.4434	-0.352943	S0
25.451	-0.352957	S0
25.4598	-0.352969	S0
25.4686	-0.352979	S0
25.477	-0.352992	S0
25.4845	-0.353004	S0
25.493	-0.353023	S0
25.5016	-0.353045	S0
25.5097	-0.353069	S0
25.518	-0.353099	S0
25.526	-0.353122	S0
25.5334	-0.353142	S0
25.5424	-0.353165	S0
25.5504	-0.353188	S0
25.559	-0.353213	S0
25.567	-0.353236	S0
25.5756	-0.353253	S0
25.5835	-0.353272	S0
25.5926	-0.353288	S0
25.5999	-0.353301	S0
25.6091	-0.353321	S0
25.6171	-0.353337	S0
25.6254	-0.353346	S0
25.6341	-0.353354	S0
25.6426	-0.353365	S0
25.6501	-0.353372	S0
25.6584	-0.353381	S0
25.6667	-0.353393	S0
25.675	-0.353404	S0
25.6832	-0.353419	S0
25.6919	-0.353434	S0
25.7005	-0.35345	S0
25.7089	-0.353467	S0
25.7169	-0.353484	S0
25.7252	-0.353497	S0
25.7336	-0.353511	S0
25.7418	-0.353522	S0
25.7501	-0.353533	S0
25.7586	-0.353543	S0
25.7668	-0.353553	S0
25.7746	-0.353562	S0
25.7839	-0.353575	S0
25.7917	-0.353585	S0
25.8	-0.353594	S0
25.8077	-0.353603	S0
25.8164	-0.353618	S0
25.8243	-0.353636	S0
25.8326	-0.353655	S0
25.8409	-0.353671	S0
25.85	-0.353689	S0
25.8589	-0.353714	S0
25.8662	-0.353733	S0
25.875	-0.353752	S0
25.883	-0.353768	S0
25.8909	-0.353782	S0
25.8999	-0.35379	S0
25.9077	-0.353802	S0
25.9159	-0.353809	S0
25.9245	-0.353817	S0
25.9323	-0.353824	S0
25.9407	-0.353833	S0
25.9497	-0.353841	S0
25.9577	-0.35385	S0
25.9656	-0.353859	S0
25.9741	-0.353867	S0
25.9821	-0.353875	S0
[truncated: 22,940 more rows]

[truncated: 4 more sheets: HeLEA68614_Trehalose, HeLEA68614_Sucrose, Trehalose, Sucrose]
