# Supplementary material for: Disordered proteins interact with the chemical environment to tune their protective function during drying
Source: eLife. 2024 Nov 19;13:RP97231. doi: 10.7554/eLife.97231 (PMC11575898; doi:10.7554/eLife.97231)
Supplement: Figure 6—figure supplement 1—source data 1. [file elife-97231-fig6-figsupp1-data1.xlsx]

## Sheet: Tris
Q	I(Q)	Error
0.0114	16.0465	49.4946
0.01191	6.67204	39.1669
0.01242	12.0119	32.5654
0.01292	10.6759	25.0967
0.01343	13.8872	17.1174
0.01394	13.8628	14.5373
0.01444	15.5135	9.54578
0.01495	14.2599	6.40758
0.01546	15.1477	4.68303
0.01596	14.7937	3.39287
0.01647	14.0917	2.55779
0.01698	13.9662	2.08596
0.01748	14.0942	1.72775
0.01799	12.9971	1.19235
0.0185	14.2476	0.949743
0.019	13.2878	0.799694
0.01951	13.3365	0.600544
0.02002	13.0022	0.551202
0.02052	12.2858	0.462315
0.02103	12.5149	0.380798
0.02154	12.1902	0.36003
0.02204	12.1443	0.337294
0.02255	11.8076	0.30629
0.02306	11.3943	0.27509
0.02356	11.2537	0.260172
0.02407	11.074	0.237724
0.02458	10.7399	0.227785
0.02509	10.5209	0.215403
0.02559	10.4748	0.206952
0.0261	10.3395	0.204496
0.02661	10.0628	0.189566
0.02711	9.99874	0.191466
0.02762	9.43869	0.188531
0.02813	9.23883	0.177774
0.02863	9.31829	0.175627
0.02914	8.92728	0.16755
0.02965	8.71303	0.167094
0.03015	8.93163	0.168409
0.03066	8.79758	0.169737
0.03117	8.55456	0.16284
0.03167	8.18374	0.156325
0.03218	8.02487	0.15212
0.03269	8.15449	0.157043
0.03319	7.94614	0.145422
0.0337	7.57929	0.151236
0.03421	7.46033	0.149891
0.03471	7.29943	0.144416
0.03522	7.22077	0.144158
0.03573	7.13363	0.138684
0.03623	6.70329	0.140909
0.03674	6.70276	0.137099
0.03725	6.84105	0.135165
0.03775	6.72396	0.131804
0.03826	6.55559	0.130971
0.03877	6.33504	0.128239
0.03927	6.18957	0.129912
0.03978	6.17798	0.130544
0.04029	6.09631	0.125571
0.0408	5.99731	0.123036
0.0413	5.88494	0.126737
0.04181	5.81916	0.123273
0.04232	5.94513	0.12215
0.04282	5.48189	0.119216
0.04333	5.48428	0.116468
0.04384	5.24605	0.117729
0.04434	5.24883	0.118642
0.04485	5.2888	0.116094
0.04536	5.0617	0.114033
0.04586	4.98645	0.113986
0.04637	4.99768	0.114294
0.04688	4.84064	0.111616
0.04738	4.80729	0.110377
0.04789	4.80061	0.10833
0.0484	4.61001	0.109248
0.0489	4.28803	0.106328
0.04941	4.42589	0.10547
0.04992	4.25549	0.104462
0.05042	4.30248	0.104791
0.05093	4.18505	0.104594
0.05144	4.28727	0.102747
0.05194	3.87154	0.100584
0.05245	4.0394	0.0985576
0.05296	3.93091	0.0991219
0.05346	4.01787	0.097321
0.05397	3.83231	0.0975113
0.05448	3.89007	0.0970348
0.05498	3.71422	0.0952296
0.05549	3.64228	0.0973776
0.056	3.67789	0.0953663
0.0565	3.59653	0.0947866
0.05701	3.55727	0.0956314
0.05752	3.489	0.0918624
0.05803	3.27174	0.0907015
0.05853	3.33998	0.0906837
0.05904	3.37284	0.0932792
0.05955	3.22155	0.0894557
0.06005	3.42429	0.0900753
0.06056	3.13506	0.0902858
0.06107	3.08602	0.0900049
0.06157	3.0659	0.0883054
0.06208	2.92723	0.0876727
0.06259	2.77647	0.0879326
0.06309	2.92836	0.0874276
0.0636	2.94985	0.086349
0.06411	2.92379	0.0862297
0.06461	2.90882	0.085363
0.06512	2.70659	0.0852255
0.06563	2.75698	0.0845478
0.06613	2.57591	0.0839437
0.06664	2.65964	0.0838997
0.06715	2.58022	0.0836324
0.06765	2.58856	0.0822325
0.06816	2.46843	0.083304
0.06867	2.54885	0.0822334
0.06917	2.34294	0.081449
0.06968	2.34324	0.0813701
0.07019	2.47893	0.0786408
0.07069	2.54394	0.0799521
0.0712	2.47988	0.0798952
0.07171	2.24934	0.0792533
0.07221	2.3892	0.080079
0.07272	2.40083	0.0778049
0.07323	2.33476	0.0783634
0.07373	2.25547	0.0772971
0.07424	2.30001	0.0750445
0.07475	2.15618	0.0783693
0.07526	2.13958	0.0762601
0.07576	2.23694	0.0759686
0.07627	2.07998	0.0749588
0.07678	2.21783	0.0758268
0.07728	1.99089	0.07434
0.07779	2.00768	0.0744284
0.0783	2.06982	0.0747226
0.0788	2.09422	0.0750826
0.07931	2.04269	0.074273
0.07982	1.96679	0.0765559
0.08032	2.0618	0.074639
0.08083	1.88834	0.0753939
0.08134	1.87943	0.0766484
0.08184	1.96238	0.0759322
0.08235	1.94053	0.0761422
0.08286	1.92581	0.0752357
0.08336	1.90032	0.0771117
0.08387	1.79043	0.0750436
0.08438	1.90693	0.0740642
0.08488	1.69599	0.0760785
0.08539	1.76295	0.0766213
0.0859	1.78638	0.0746686
0.0864	1.70097	0.0756614
0.08691	1.83524	0.0759529
0.08742	1.69449	0.0757921
0.08792	1.75581	0.07384
0.08843	1.7064	0.0749552
0.08894	1.71051	0.0740955
0.08944	1.73057	0.0734056
0.08995	1.6727	0.0747476
0.09046	1.6598	0.0747564
0.09096	1.58036	0.0730323
0.09147	1.58347	0.0721047
0.09198	1.57686	0.0715422
0.09248	1.46301	0.0732841
0.09299	1.62518	0.0722133
0.0935	1.56332	0.0733252
0.09401	1.56543	0.0728947
0.09451	1.51286	0.0728398
0.09502	1.54022	0.0733371
0.09553	1.48391	0.0719985
0.09603	1.62292	0.0738921
0.09654	1.4194	0.0711224
0.09705	1.38309	0.0719253
0.09755	1.3736	0.0726698
0.09806	1.40084	0.0718962
0.09857	1.39281	0.072463
0.09907	1.41165	0.0718903
0.09958	1.38975	0.0720292
0.10009	1.35565	0.0715907
0.10059	1.46194	0.0714328
0.1011	1.3965	0.071723
0.10161	1.29168	0.07144
0.10211	1.29186	0.0723752
0.10262	1.30464	0.0717503
0.10313	1.1495	0.0730483
0.10363	1.25293	0.0709032
0.10414	1.29253	0.0701357
0.10465	1.35438	0.0702781
0.10515	1.36149	0.0687112
0.10566	1.1898	0.0693981
0.10617	1.27755	0.0701927
0.10667	1.19788	0.0674424
0.10718	1.31494	0.0681275
0.10769	1.30269	0.0680079
0.10819	1.15335	0.0678873
0.1087	1.18126	0.065668
0.10921	1.20283	0.0665189
0.10971	1.09007	0.0669602
0.11022	1.19368	0.0647798
0.11073	1.23876	0.0645198
0.11123	1.19999	0.0650346
0.11174	1.16572	0.0651097
0.11225	1.08004	0.0639497
0.11275	1.19755	0.0634684
0.11326	1.22976	0.0634041
0.11377	1.21016	0.0627246
0.11428	1.10507	0.0624319
0.11478	1.0706	0.0629691
0.11529	0.97135	0.0620009
0.1158	1.16664	0.0618498
0.1163	1.21653	0.0621511
0.11681	0.98081	0.0618834
0.11732	1.08984	0.0609792
0.11782	1.06012	0.0621157
0.11833	1.07994	0.0599038
0.11884	1.0004	0.0613435
0.11934	1.06328	0.0604875
0.11985	1.09227	0.0593727
0.12036	1.02712	0.0607258
0.12086	1.02547	0.0597588
0.12137	0.998525	0.0599766
0.12188	0.990187	0.0605389
0.12238	0.945985	0.059076
0.12289	1.07136	0.0583829
0.1234	0.998405	0.0589339
0.1239	1.12696	0.0590906
0.12441	0.972295	0.0584351
0.12492	0.988873	0.0579175
0.12542	0.89226	0.0580288
0.12593	0.960762	0.0580907
0.12644	0.836738	0.0567042
0.12694	0.913183	0.0566075
0.12745	0.93813	0.0568414
0.12796	0.957908	0.0569575
0.12846	1.00314	0.0572625
0.12897	0.979407	0.0566274
0.12948	0.953105	0.0555389
0.12998	0.959422	0.05535
0.13049	0.90372	0.0557076
0.131	0.854047	0.0555694
0.1315	0.913438	0.0554334
0.13201	0.931418	0.0547534
0.13252	0.82718	0.0547703
0.13302	0.874642	0.0546976
0.13353	0.850255	0.0546413
0.13404	0.871235	0.0534877
0.13454	0.872845	0.054292
0.13505	0.856875	0.0544003
0.13556	0.880618	0.0539019
0.13606	0.838448	0.0538373
0.13657	0.827122	0.0538355
0.13708	0.895142	0.0533436
0.13758	0.874977	0.0532549
0.13809	0.815385	0.0535027
0.1386	0.808813	0.053094
0.13911	0.82077	0.0528789
0.13961	0.89564	0.0539769
0.14012	0.838285	0.0532479
0.14063	0.834022	0.0521633
0.14113	0.793443	0.0519704
0.14164	0.831793	0.0518858
0.14215	0.766888	0.0522435
0.14265	0.733718	0.0526404
0.14316	0.778425	0.0516603
0.14367	0.839017	0.0514078
0.14417	0.856823	0.0516867
0.14468	0.861853	0.050873
0.14519	0.738375	0.052048
0.14569	0.727158	0.0515871
0.1462	0.783865	0.0511006
0.14671	0.74963	0.051082
0.14721	0.735618	0.0510604
0.14772	0.761255	0.0504767
0.14823	0.804955	0.0502431
0.14873	0.720163	0.0498563
0.14924	0.819847	0.0507991
0.14975	0.730715	0.0507105
0.15025	0.768765	0.0507055
0.15076	0.767648	0.050641
0.15127	0.680867	0.0500789
0.15177	0.719233	0.0496752
0.15228	0.66902	0.0499054
0.15279	0.837858	0.0501753
0.15329	0.755545	0.0489274
0.1538	0.678305	0.0494451
0.15431	0.617818	0.0490589
0.15481	0.654567	0.0484599
0.15532	0.70047	0.0490056
0.15583	0.705365	0.0489462
0.15633	0.592755	0.048247
0.15684	0.689133	0.0480029
0.15735	0.680205	0.0487599
0.15785	0.71043	0.0490174
0.15836	0.657905	0.0477548
0.15887	0.62638	0.0478725
0.15937	0.669443	0.0479917
0.15988	0.699005	0.0474888
0.16039	0.63632	0.0474437
0.16089	0.593017	0.0478015
0.1614	0.685678	0.0471701
0.16191	0.701503	0.047355
0.16241	0.649552	0.047471
0.16292	0.653678	0.047159
0.16343	0.609563	0.0467759
0.16393	0.638983	0.0471497
0.16444	0.67404	0.0472776
0.16495	0.649957	0.0468663
0.16545	0.636768	0.0466868
0.16596	0.670857	0.0470003
0.16647	0.582518	0.0464996
0.16697	0.619765	0.0459767
0.16748	0.55115	0.0471185
0.16799	0.615138	0.0475872
0.16849	0.569565	0.0473549
0.169	0.673795	0.0475377
0.16951	0.679527	0.0483566
0.17001	0.587085	0.047701
0.17052	0.595325	0.047572
0.17103	0.564765	0.0480585
0.17153	0.66397	0.0473223
0.17204	0.605823	0.0477474
0.17255	0.55392	0.0478665
0.17305	0.59018	0.0480234
0.17356	0.542528	0.0483503
0.17407	0.630513	0.0475548
0.17457	0.644402	0.0479977
0.17508	0.532432	0.0476792
0.17559	0.661672	0.048135
0.1761	0.548418	0.0472372
0.1766	0.524855	0.0476241
0.17711	0.603988	0.0480622
0.17762	0.5319	0.0474761
0.17812	0.549262	0.0475737
0.17863	0.561608	0.0475184
0.17914	0.54972	0.0476486
0.17964	0.59145	0.0467805
0.18015	0.54077	0.0481126
0.18066	0.535277	0.0477418
0.18116	0.548397	0.0466596
0.18167	0.512125	0.0480086
0.18218	0.592017	0.04886
0.18268	0.571017	0.0485499
0.18319	0.596895	0.0481195
0.1837	0.536312	0.0490373
0.1842	0.528887	0.0487882
0.18471	0.49473	0.0486689
0.18522	0.478705	0.0487254
0.18572	0.463275	0.049685
0.18623	0.47455	0.049545
0.18674	0.500347	0.0492624
0.18724	0.504095	0.0500426
0.18775	0.439928	0.0501575
0.18826	0.409455	0.0495453
0.18876	0.487563	0.0500326
0.18927	0.477392	0.0503379
0.18978	0.599535	0.0503246
0.19028	0.503855	0.0504091
0.19079	0.548582	0.0506146
0.1913	0.483473	0.0507158
0.1918	0.512672	0.0500491
0.19231	0.482413	0.0504856
0.19282	0.52541	0.0511892
0.19332	0.474785	0.0512219
0.19383	0.492855	0.0504975
0.19434	0.517983	0.0506424
0.19484	0.471492	0.0511055
0.19535	0.526687	0.0506364
0.19586	0.43704	0.0513792
0.19636	0.51814	0.0515544
0.19687	0.547065	0.0513764
0.19738	0.473733	0.051309
0.19788	0.530977	0.0511186
0.19839	0.43874	0.0515991
0.1989	0.530197	0.0514992
0.1994	0.469027	0.0507832
0.19991	0.473042	0.0520567
0.20042	0.479442	0.051242
0.20092	0.425223	0.0510027
0.20143	0.445765	0.0511118
0.20194	0.476137	0.0521699
0.20244	0.40165	0.0509663
0.20295	0.45847	0.0513493
0.20346	0.46072	0.0518393
0.20396	0.44728	0.0511781
0.20447	0.46243	0.0510915
0.20498	0.444585	0.0509115
0.20548	0.435758	0.0513818
0.20599	0.446298	0.0508315
0.2065	0.475442	0.0516139
0.207	0.418015	0.0515303
0.20751	0.422135	0.0520573
0.20802	0.407765	0.0514784
0.20852	0.43369	0.0512017
0.20903	0.43014	0.0513166
0.20954	0.48734	0.0504297
0.21004	0.375638	0.0507342
0.21055	0.445605	0.0517848
0.21106	0.408957	0.0512408
0.21156	0.502567	0.0509677
0.21207	0.398205	0.0511691
0.21258	0.414247	0.0520217
0.21308	0.504945	0.0510615
0.21359	0.46872	0.0512239
0.2141	0.462925	0.0514528
0.2146	0.320485	0.0511635
0.21511	0.397825	0.050817
0.21562	0.410197	0.0504966
0.21612	0.41723	0.0521835
0.21663	0.436173	0.0502329
0.21714	0.4059	0.0504091
0.21764	0.386132	0.0512352
0.21815	0.47895	0.0508609
0.21866	0.369017	0.0503967
0.21916	0.411623	0.0507598
0.21967	0.433482	0.0511553
0.22018	0.37495	0.0497174
0.22068	0.40528	0.0506921
0.22119	0.392257	0.0504166
0.2217	0.390863	0.0508745
0.2222	0.312597	0.0499776
0.22271	0.397705	0.0498159
0.22322	0.327885	0.0503816
0.22372	0.40232	0.0490415
0.22423	0.37052	0.0494373
0.22474	0.402955	0.0499601
0.22524	0.342112	0.0490655
0.22575	0.353485	0.0492382
0.22626	0.371447	0.0493988
0.22676	0.482922	0.0493091
0.22727	0.439767	0.0489901
0.22778	0.396535	0.0484097
0.22828	0.379763	0.0487868
0.22879	0.44583	0.0491265
0.2293	0.327315	0.0476264
0.2298	0.401185	0.0488222
0.23031	0.434845	0.0481711
0.23082	0.3637	0.0479962
0.23132	0.3763	0.047825
0.23183	0.375248	0.0480988
0.23234	0.342135	0.0471917
0.23284	0.30893	0.0470191
0.23335	0.33544	0.0478337
0.23386	0.361	0.0476874
0.23436	0.417573	0.0474967
0.23487	0.37988	0.0464608
0.23538	0.397475	0.0468218
0.23588	0.289915	0.045811
0.23639	0.37112	0.0466897
0.2369	0.403832	0.0465244
0.2374	0.365815	0.0468216
0.23791	0.350828	0.0460525
0.23842	0.30256	0.0458761
0.23892	0.40125	0.0468021
0.23943	0.31018	0.0457359
0.23994	0.435117	0.0463016
0.24044	0.405008	0.0455963
0.24095	0.35682	0.0452798
0.24145	0.371708	0.0452474
0.24196	0.361065	0.0453061
0.24247	0.32303	0.0453558
0.24297	0.336587	0.0449921
0.24348	0.39899	0.045197
0.24399	0.38872	0.0450731
0.24449	0.33408	0.045337
0.245	0.329622	0.0446643
0.24551	0.37089	0.044361
0.24601	0.345295	0.0449083
0.24652	0.368858	0.0443933
0.24703	0.31225	0.0440701
0.24753	0.31165	0.0448555
0.24804	0.354075	0.0450519
0.24855	0.400857	0.0437254
0.24905	0.399423	0.0445988
0.24956	0.315735	0.0446481
0.25007	0.303415	0.043701
0.25057	0.319902	0.0439206
0.25108	0.395937	0.0436109
0.25159	0.270575	0.043818
0.25209	0.297903	0.0437067
0.2526	0.35947	0.043667
0.25311	0.28363	0.0441921
0.25361	0.347857	0.042752
0.25412	0.37485	0.0429343
0.25463	0.329735	0.0434944
0.25513	0.344687	0.0432307
0.25564	0.3136	0.0427417
0.25615	0.299625	0.0428193
0.25665	0.297183	0.0426527
0.25716	0.368167	0.0425302
0.25767	0.311595	0.0422524
0.25817	0.404222	0.0432715
0.25868	0.311377	0.0424811
0.25919	0.30527	0.0426042
0.25969	0.322235	0.0420505
0.2602	0.324375	0.0419889
0.26071	0.31359	0.0416525
0.26121	0.217092	0.0415455
0.26172	0.289885	0.041645
0.26223	0.378862	0.041779
0.26273	0.244045	0.0414687
0.26324	0.35734	0.0416136
0.26375	0.335895	0.0413451
0.26425	0.290828	0.0414809
0.26476	0.308233	0.0413241
0.26527	0.289237	0.0419763
0.26577	0.378333	0.0414592
0.26628	0.314845	0.0415838
0.26679	0.34733	0.0410362
0.26729	0.307607	0.0408499
0.2678	0.276653	0.0411264
0.26831	0.368482	0.0408613
0.26881	0.333357	0.04085
0.26932	0.26788	0.0407201
0.26983	0.232082	0.0407196
0.27033	0.323203	0.040945
0.27084	0.340353	0.0409747
0.27134	0.322223	0.0407282
0.27185	0.277232	0.0408184
0.27236	0.325487	0.0406328
0.27286	0.283303	0.0403964
0.27337	0.305277	0.0402649
0.27388	0.320043	0.0402495
0.27438	0.315148	0.0403576
0.27489	0.331462	0.0396478
0.2754	0.334715	0.0399803
0.2759	0.324555	0.0402689
0.27641	0.316785	0.0399463
0.27692	0.305663	0.0401939
0.27742	0.267755	0.039481
0.27793	0.280062	0.0401023
0.27844	0.31079	0.0396452
0.27894	0.270087	0.0396912
0.27945	0.271852	0.0396773
0.27996	0.309173	0.039938
0.28046	0.289382	0.039546
0.28097	0.27067	0.0392214
0.28148	0.28969	0.0395387
0.28198	0.26842	0.039486
0.28249	0.285665	0.0390692
0.283	0.255597	0.039184
0.2835	0.316263	0.0393538
0.28401	0.338222	0.0391685
0.28452	0.191615	0.0394063
0.28502	0.321742	0.0392314
0.28553	0.296198	0.0394662
0.28604	0.308698	0.0394323
0.28654	0.25304	0.0390984
0.28705	0.282845	0.0395363
0.28756	0.234497	0.0388346
0.28806	0.308667	0.0389636
0.28857	0.29532	0.039286
0.28908	0.281373	0.0394705
0.28958	0.309155	0.0392384
0.29009	0.270377	0.0395175
0.29059	0.193648	0.0390937
0.2911	0.242712	0.0393058
0.29161	0.235915	0.0393237
0.29211	0.288645	0.0394385
0.29262	0.27479	0.0394844
0.29313	0.331445	0.0393138
0.29363	0.211005	0.0390134
0.29414	0.218915	0.0389795
0.29465	0.31761	0.0392598
0.29515	0.266065	0.0389236
0.29566	0.29223	0.0390526
0.29617	0.22394	0.0390934
0.29667	0.208042	0.0390984
0.29718	0.254408	0.0387339
0.29769	0.27778	0.0391672
0.29819	0.233113	0.0389153
0.2987	0.270813	0.0390197
0.29921	0.30648	0.0390949
0.29971	0.291645	0.0392998
0.30022	0.280303	0.039171
0.30073	0.23326	0.0388606
0.30123	0.290517	0.0387302
0.30174	0.201063	0.039215
0.30225	0.206138	0.0389214
0.30275	0.293513	0.0383684
0.30326	0.263553	0.0388625
0.30377	0.243635	0.0380008
0.30427	0.230307	0.0384603
0.30478	0.264643	0.0386746
0.30529	0.285952	0.0386196
0.30579	0.197717	0.0382372
0.3063	0.25713	0.0380537
0.3068	0.253315	0.038023
0.30731	0.214485	0.0385088
0.30782	0.256955	0.0386135
0.30832	0.272935	0.0389893
0.30883	0.277682	0.0392087
0.30934	0.26132	0.0390061
0.30984	0.213707	0.0390219
0.31035	0.267348	0.0391423
0.31086	0.348222	0.0391426
0.31136	0.177198	0.039166
0.31187	0.215062	0.0394099
0.31238	0.284083	0.0402151
0.31288	0.296073	0.0402748
0.31339	0.282108	0.0402191
0.3139	0.239835	0.04097
0.3144	0.161513	0.0404499
0.31491	0.207492	0.0412401
0.31542	0.173847	0.0405266
0.31592	0.19979	0.0410422
0.31643	0.288448	0.0412987
0.31694	0.244935	0.0408997
0.31744	0.261008	0.0417064
0.31795	0.239283	0.0413375
0.31845	0.21901	0.0412619
0.31896	0.259925	0.0412134
0.31947	0.18591	0.0414036
0.31997	0.240982	0.0416826
0.32048	0.230618	0.0415646
0.32099	0.213322	0.0422352
0.32149	0.276128	0.0416455
0.322	0.284515	0.041408
0.32251	0.225775	0.0417455
0.32301	0.183883	0.0413249
0.32352	0.169153	0.0411587
0.32403	0.2234	0.0415126
0.32453	0.213493	0.0416394
0.32504	0.25732	0.0413988
0.32555	0.227128	0.0410869
0.32605	0.202698	0.0414953
0.32656	0.193912	0.0415813
0.32707	0.217042	0.0411863
0.32757	0.210558	0.0416913
0.32808	0.28471	0.0416625
0.32859	0.180253	0.0419833
0.32909	0.202733	0.0419446
0.3296	0.20523	0.0419267
0.3301	0.265688	0.0421764
0.33061	0.169195	0.0419028
0.33112	0.299683	0.0418251
0.33162	0.249543	0.0421096
0.33213	0.185397	0.0423046
0.33264	0.192878	0.0420518
0.33314	0.243195	0.042045
0.33365	0.227768	0.0426205
0.33416	0.267355	0.0421503
0.33466	0.195568	0.042126
0.33517	0.284535	0.0424144
0.33568	0.21586	0.0423821
0.33618	0.200322	0.042284
0.33669	0.23747	0.0423852
0.3372	0.199742	0.0424821
0.3377	0.213935	0.0424371
0.33821	0.198802	0.042728
0.33872	0.18115	0.0425391
0.33922	0.183762	0.0432067
0.33973	0.221702	0.0424631
0.34023	0.18798	0.042529
0.34074	0.206745	0.0427976
0.34125	0.166357	0.0431365
0.34175	0.19062	0.0427098
0.34226	0.23391	0.0428784
0.34277	0.1995	0.0428521
0.34327	0.196022	0.042348
0.34378	0.18992	0.0426308
0.34429	0.173643	0.0432544
0.34479	0.194013	0.0428702
0.3453	0.239083	0.0431133
0.34581	0.179875	0.0430341
0.34631	0.196373	0.0431443
0.34682	0.232712	0.0433218
0.34733	0.190145	0.042991
0.34783	0.212592	0.0427729
0.34834	0.230615	0.0432892
0.34884	0.227332	0.0429942
0.34935	0.184397	0.0426502
0.34986	0.212355	0.0435815
0.35036	0.218693	0.0430933
0.35087	0.19304	0.0423372
0.35138	0.252792	0.0432833
0.35188	0.167745	0.0427025
0.35239	0.253038	0.0426915
0.3529	0.213572	0.0428902
0.3534	0.118832	0.0429718
0.35391	0.212347	0.0431186
0.35442	0.221215	0.0424981
0.35492	0.16906	0.0421415
0.35543	0.21838	0.0411163
0.35594	0.191192	0.0416734
0.35644	0.175985	0.0406824
0.35695	0.144885	0.04089
0.35745	0.18022	0.0409377
0.35796	0.2421	0.0401669
0.35847	0.143712	0.040624
0.35897	0.180352	0.040915
0.35948	0.286703	0.0410326
0.35999	0.146278	0.0409
0.36049	0.139267	0.0410424
0.361	0.220828	0.0416413
0.36151	0.222718	0.0416184
0.36201	0.13213	0.0411149
0.36252	0.21235	0.0418992
0.36303	0.17663	0.0413003
0.36353	0.253808	0.0416602
0.36404	0.182143	0.0422581
0.36455	0.21	0.0422134
0.36505	0.250543	0.042159
0.36556	0.204235	0.0417442
0.36606	0.249435	0.0421426
0.36657	0.181757	0.0422965
0.36708	0.198733	0.0425586
0.36758	0.154312	0.0430628
0.36809	0.170063	0.0433232
0.3686	0.117078	0.0427828
0.3691	0.222578	0.0432708
0.36961	0.153952	0.0435191
0.37012	0.151165	0.0442488
0.37062	0.172737	0.0437306
0.37113	0.155488	0.0441461
0.37164	0.153255	0.0453132
0.37214	0.15722	0.0446233
0.37265	0.180493	0.0443102
0.37315	0.1756	0.0449076
0.37366	0.301787	0.0445493
0.37417	0.20428	0.0448532
0.37467	0.20378	0.0445236
0.37518	0.102475	0.0448226
0.37569	0.16596	0.0452283
0.37619	0.183805	0.0452818
0.3767	0.204847	0.0453373
0.37721	0.152705	0.0459111
0.37771	0.144825	0.0455594
0.37822	0.165063	0.0462265
0.37873	0.130158	0.0463895
0.37923	0.258217	0.0473285
0.37974	0.12056	0.0461316
0.38024	0.22012	0.0476418
0.38075	0.182902	0.0476512
0.38126	0.261015	0.0474322
0.38176	0.23226	0.0475343
0.38227	0.172515	0.0482752
0.38278	0.145317	0.0477185
0.38328	0.250148	0.0476514
0.38379	0.170742	0.0480524
0.3843	0.173638	0.0483236
0.3848	0.203767	0.0489304
0.38531	0.168572	0.0485848
0.38582	0.149352	0.0486699
0.38632	0.177535	0.0491151
0.38683	0.15332	0.0493673
0.38733	0.147865	0.0498027
0.38784	0.214575	0.0494576
0.38835	0.206627	0.04987
0.38885	0.203887	0.049729
0.38936	0.161573	0.0509057
0.38987	0.16512	0.050654
0.39037	0.197797	0.0510357
0.39088	0.201648	0.050887
0.39139	0.211998	0.051033
0.39189	0.14826	0.0519441
0.3924	0.175435	0.0515807
0.3929	0.1525	0.0516791
0.39341	0.201052	0.0518843
0.39392	0.129263	0.0534558
0.39442	0.170728	0.0522091
0.39493	0.242033	0.0530027
0.39544	0.195312	0.0536032
0.39594	0.122455	0.0528383
0.39645	0.25933	0.0567086
0.39696	0.173052	0.0539
0.39746	0.207558	0.0532828
0.39797	0.172915	0.0547464
0.39847	0.19667	0.0539637
0.39898	0.193692	0.0542395
0.39949	0.204735	0.0553547
0.39999	0.230345	0.0551996
0.4005	0.221452	0.0553473
0.40101	0.102347	0.0555568
0.40151	0.175003	0.0560697
0.40202	0.224183	0.0564911
0.40253	0.229013	0.0560952
0.40303	0.136302	0.0575462
0.40354	0.100422	0.0563633
0.40405	0.07013	0.0564799
0.40455	0.124565	0.0581609
0.40506	0.210155	0.057694
0.40556	0.129277	0.0562553
0.40607	0.193355	0.0574851
0.40658	0.185355	0.0584106
0.40708	0.278185	0.0579823
0.40759	0.20164	0.0578578
0.4081	0.198208	0.0594116
0.4086	0.1999	0.0574862
0.40911	0.187312	0.0577588
0.40962	0.133382	0.0584614
0.41012	0.12587	0.0596098
0.41063	0.19865	0.057977
0.41113	0.154633	0.0583251
0.41164	0.217337	0.0600858
0.41215	0.13454	0.0604124
0.41265	0.16135	0.0595519
0.41316	0.12963	0.059697
0.41367	0.190793	0.0599715
0.41417	0.078915	0.0591951
0.41468	0.191123	0.0589893
0.41518	0.117572	0.0607642
0.41569	0.25142	0.0614338
0.4162	0.136453	0.0600493
0.4167	0.18264	0.0601371
0.41721	0.11965	0.0614177
0.41772	0.205255	0.0606616
0.41822	0.247798	0.0611436
0.41873	0.214243	0.0615492
0.41924	0.202187	0.0624457
0.41974	0.258198	0.0619481
0.42025	0.187745	0.0627247
0.42075	0.153007	0.0636875
0.42126	0.193983	0.062632
0.42177	0.129328	0.0626603
0.42227	0.193442	0.0636498
0.42278	0.176693	0.0645341
0.42329	0.0743375	0.0640572
0.42379	0.17277	0.0643382
0.4243	0.17345	0.0635794
0.42481	0.13126	0.0674004
0.42531	0.107635	0.065308
0.42582	0.0191325	0.0662053
0.42632	0.191472	0.069189
0.42683	0.117142	0.0676412
0.42734	0.18898	0.0659384
0.42784	0.111382	0.0682241
0.42835	0.131137	0.0703198
0.42886	0.13991	0.0695705
0.42936	0.11648	0.0679868
0.42987	0.22189	0.0705946
0.43037	0.17299	0.0709789
0.43088	0.14848	0.0705423
0.43139	0.101917	0.0707246
0.43189	0.16225	0.0723144
0.4324	0.24488	0.0729384
0.43291	0.0949875	0.0719599
0.43341	0.0091175	0.0731665
0.43392	0.120663	0.0746375
0.43443	0.077185	0.0740108
0.43493	0.146792	0.074072
0.43544	0.195538	0.0768646
0.43594	0.195743	0.0771118
0.43645	0.144132	0.0766584
0.43696	0.172813	0.0768769
0.43746	0.106883	0.0808578
0.43797	0.22777	0.0788386
0.43848	0.253097	0.0804248
0.43898	0.24486	0.0798038
0.43949	0.196763	0.0817314
0.43999	0.13191	0.0817436

## Sheet: 500_Trehalose
Q	I(Q)	Error
0.0114	160.702	14.9301
0.01191	143.751	11.8201
0.01242	131.1	9.79299
0.01292	120.225	7.55071
0.01343	112.079	5.26857
0.01394	102.541	4.41081
0.01444	96.6103	2.87771
0.01495	89.5043	1.95393
0.01546	84.2102	1.42375
0.01596	79.6966	1.05582
0.01647	75.081	0.808836
0.01698	70.656	0.658629
0.01748	67.1156	0.542371
0.01799	63.6064	0.382029
0.0185	60.3598	0.306734
0.019	57.237	0.26117
0.01951	54.6255	0.210421
0.02002	52.1081	0.191746
0.02052	49.8016	0.169627
0.02103	47.2185	0.148841
0.02154	45.2431	0.138634
0.02204	43.3002	0.132078
0.02255	41.2704	0.119668
0.02306	39.6108	0.112584
0.02356	37.7062	0.10476
0.02407	36.355	0.102919
0.02458	34.7906	0.0955021
0.02509	33.4842	0.0914496
0.02559	32.361	0.0901371
0.0261	30.939	0.0843376
0.02661	29.9454	0.0831414
0.02711	28.8486	0.0812844
0.02762	27.8401	0.0785778
0.02813	26.8419	0.0752068
0.02863	25.8463	0.0748629
0.02914	25.177	0.0736621
0.02965	24.4177	0.0711094
0.03015	23.4847	0.0693635
0.03066	22.9111	0.0683553
0.03117	22.0852	0.0667206
0.03167	21.5307	0.0657828
0.03218	20.9854	0.0648036
0.03269	20.3166	0.0643335
0.03319	19.7284	0.0616682
0.0337	19.2629	0.0618496
0.03421	18.7032	0.0614371
0.03471	18.0751	0.0598128
0.03522	17.767	0.0583521
0.03573	17.196	0.058023
0.03623	16.7234	0.0572243
0.03674	16.1907	0.0569745
0.03725	15.7893	0.0552267
0.03775	15.445	0.0541085
0.03826	15.1352	0.0534917
0.03877	14.55	0.0528077
0.03927	14.3512	0.0526942
0.03978	13.8272	0.0523213
0.04029	13.5871	0.0506758
0.0408	13.2786	0.0510923
0.0413	12.8818	0.0506068
0.04181	12.7747	0.0498017
0.04232	12.4027	0.0493365
0.04282	12.0746	0.0489791
0.04333	11.8322	0.0478858
0.04384	11.6061	0.0475919
0.04434	11.2287	0.0475231
0.04485	11.1565	0.0469177
0.04536	10.908	0.0466222
0.04586	10.7071	0.0456746
0.04637	10.568	0.046062
0.04688	10.3422	0.0452897
0.04738	10.1776	0.044472
0.04789	9.93591	0.0441554
0.0484	9.66605	0.0444844
0.0489	9.5688	0.0433734
0.04941	9.413	0.0430804
0.04992	9.19419	0.0426781
0.05042	9.04682	0.0427044
0.05093	8.97956	0.0414787
0.05144	8.7091	0.0412014
0.05194	8.58645	0.0407947
0.05245	8.42819	0.0399385
0.05296	8.28886	0.0399114
0.05346	8.11152	0.0400371
0.05397	7.95751	0.0396503
0.05448	7.91424	0.0390361
0.05498	7.77173	0.0387192
0.05549	7.67029	0.0389342
0.056	7.52508	0.0384292
0.0565	7.36039	0.0383691
0.05701	7.20853	0.0379017
0.05752	7.16436	0.0374257
0.05803	7.095	0.0375237
0.05853	6.98697	0.0371925
0.05904	6.95118	0.0374527
0.05955	6.87523	0.036503
0.06005	6.82347	0.036369
0.06056	6.76879	0.0367263
0.06107	6.8385	0.0363926
0.06157	6.76827	0.0357281
0.06208	6.75188	0.0357938
0.06259	6.83295	0.036081
0.06309	6.87039	0.0357744
0.0636	6.86666	0.0356069
0.06411	6.92502	0.035422
0.06461	6.99721	0.0347968
0.06512	7.03222	0.0349725
0.06563	6.96584	0.0345797
0.06613	7.00888	0.0349071
0.06664	6.8475	0.0342975
0.06715	6.59098	0.0341655
0.06765	6.45736	0.0342135
0.06816	6.18008	0.0339573
0.06867	6.06526	0.0333332
0.06917	5.82396	0.033129
0.06968	5.59529	0.0331734
0.07019	5.36853	0.0325377
0.07069	5.26021	0.0323971
0.0712	5.11924	0.032411
0.07171	5.05579	0.0320904
0.07221	4.90333	0.031641
0.07272	4.73007	0.0319464
0.07323	4.63112	0.0315451
0.07373	4.57394	0.0312869
0.07424	4.53325	0.0309327
0.07475	4.45578	0.0315647
0.07526	4.31397	0.0306483
0.07576	4.2914	0.0304806
0.07627	4.21393	0.0303004
0.07678	4.09803	0.0301912
0.07728	4.11237	0.0301688
0.07779	4.00078	0.0301714
0.0783	3.97622	0.0298717
0.0788	3.94659	0.0301545
0.07931	3.84523	0.0298944
0.07982	3.78885	0.0305023
0.08032	3.74782	0.0303475
0.08083	3.68841	0.030197
0.08134	3.57308	0.0301181
0.08184	3.58993	0.0306129
0.08235	3.48314	0.030131
0.08286	3.43305	0.0303255
0.08336	3.42319	0.0305931
0.08387	3.35734	0.0301174
0.08438	3.32865	0.0300281
0.08488	3.27571	0.0300996
0.08539	3.24804	0.0303951
0.0859	3.2051	0.0299253
0.0864	3.16126	0.0297625
0.08691	3.1359	0.0304158
0.08742	3.06157	0.030096
0.08792	3.06498	0.029582
0.08843	3.06009	0.029682
0.08894	2.98599	0.0301217
0.08944	2.9344	0.0295566
0.08995	2.94822	0.0295809
0.09046	2.90242	0.02975
0.09096	2.8964	0.0294749
0.09147	2.81617	0.0289767
0.09198	2.85157	0.0287428
0.09248	2.79213	0.029102
0.09299	2.74063	0.028525
0.0935	2.72462	0.0285895
0.09401	2.74889	0.0293084
0.09451	2.59897	0.0290278
0.09502	2.64834	0.0288225
0.09553	2.59246	0.0287893
0.09603	2.59595	0.0291049
0.09654	2.58937	0.0287776
0.09705	2.56954	0.028963
0.09755	2.58021	0.0290944
0.09806	2.51477	0.0288737
0.09857	2.50781	0.0286985
0.09907	2.42526	0.0286545
0.09958	2.38799	0.0287062
0.10009	2.43354	0.0283338
0.10059	2.43246	0.0283484
0.1011	2.37833	0.0290459
0.10161	2.34396	0.0287465
0.10211	2.28169	0.0286993
0.10262	2.26203	0.028871
0.10313	2.25246	0.0289927
0.10363	2.24077	0.0280334
0.10414	2.17175	0.0279485
0.10465	2.15003	0.0279696
0.10515	2.14061	0.0272953
0.10566	2.08976	0.0274931
0.10617	2.10182	0.0278716
0.10667	2.10913	0.0274741
0.10718	2.06565	0.0273103
0.10769	2.06151	0.0269986
0.10819	1.99512	0.027156
0.1087	2.01826	0.0264898
0.10921	1.9608	0.02647
0.10971	1.93197	0.0264928
0.11022	1.91404	0.026045
0.11073	1.94787	0.0259143
0.11123	1.89436	0.0257463
0.11174	1.92965	0.0259177
0.11225	1.87359	0.0254706
0.11275	1.85691	0.0255365
0.11326	1.85248	0.0255205
0.11377	1.81653	0.0252845
0.11428	1.77271	0.0250123
0.11478	1.75745	0.0249964
0.11529	1.76033	0.0248261
0.1158	1.77363	0.0247112
0.1163	1.71745	0.0247533
0.11681	1.74627	0.0246801
0.11732	1.68636	0.0243926
0.11782	1.73028	0.0244968
0.11833	1.67207	0.0242004
0.11884	1.63112	0.0244046
0.11934	1.64142	0.0241188
0.11985	1.62336	0.0238807
0.12036	1.63592	0.0240427
0.12086	1.64817	0.0237112
0.12137	1.55773	0.0237838
0.12188	1.55776	0.0237018
0.12238	1.57841	0.0234723
0.12289	1.55488	0.0235334
0.1234	1.55356	0.0234499
0.1239	1.54238	0.0235216
0.12441	1.51018	0.0230998
0.12492	1.5023	0.0231245
0.12542	1.47877	0.0233084
0.12593	1.50139	0.0230895
0.12644	1.49051	0.0227577
0.12694	1.44241	0.0225776
0.12745	1.42782	0.0228393
0.12796	1.43666	0.0225891
0.12846	1.39813	0.0226306
0.12897	1.41576	0.0224165
0.12948	1.38095	0.0222758
0.12998	1.38778	0.0221997
0.13049	1.36625	0.0222451
0.131	1.35825	0.0222615
0.1315	1.3619	0.0221239
0.13201	1.34035	0.0219669
0.13252	1.34934	0.0218918
0.13302	1.38245	0.0218297
0.13353	1.32137	0.021571
0.13404	1.31123	0.0215492
0.13454	1.29143	0.021653
0.13505	1.27957	0.0214921
0.13556	1.28782	0.0214516
0.13606	1.30327	0.0215425
0.13657	1.27797	0.0214015
0.13708	1.25749	0.0214289
0.13758	1.22407	0.0211892
0.13809	1.26155	0.0212801
0.1386	1.21957	0.0210896
0.13911	1.20386	0.0210288
0.13961	1.21162	0.0210977
0.14012	1.18988	0.0210881
0.14063	1.22547	0.0207541
0.14113	1.20705	0.0207825
0.14164	1.19157	0.0206654
0.14215	1.16358	0.0207973
0.14265	1.18353	0.0207437
0.14316	1.14455	0.0206953
0.14367	1.14142	0.02058
0.14417	1.13461	0.0205413
0.14468	1.13547	0.0204782
0.14519	1.11645	0.0205114
0.14569	1.09547	0.0204921
0.1462	1.08465	0.0202704
0.14671	1.10111	0.0203912
0.14721	1.06638	0.0202818
0.14772	1.06565	0.0202648
0.14823	1.09204	0.0201853
0.14873	1.04377	0.0200786
0.14924	1.0498	0.020107
0.14975	1.04226	0.0200789
0.15025	1.07298	0.0200648
0.15076	1.02216	0.0199739
0.15127	1.05083	0.0198706
0.15177	1.00674	0.0198739
0.15228	1.01547	0.0199103
0.15279	0.996969	0.0197188
0.15329	0.996355	0.0195485
0.1538	0.991292	0.0197068
0.15431	0.975431	0.0195328
0.15481	1.01579	0.0196377
0.15532	0.947746	0.0194165
0.15583	0.974925	0.0194786
0.15633	0.946221	0.0194323
0.15684	0.958797	0.0193184
0.15735	0.954151	0.0194742
0.15785	0.940335	0.0193041
0.15836	0.929266	0.019044
0.15887	0.949445	0.0191418
0.15937	0.939626	0.0191425
0.15988	0.948026	0.0190321
0.16039	0.951339	0.0189679
0.16089	0.916946	0.0190824
0.1614	0.903112	0.0189663
0.16191	0.883901	0.0189186
0.16241	0.938442	0.0188998
0.16292	0.914252	0.0189343
0.16343	0.898354	0.0187761
0.16393	0.853145	0.0186151
0.16444	0.839463	0.0188485
0.16495	0.865611	0.0186952
0.16545	0.851327	0.0185457
0.16596	0.852719	0.0185985
0.16647	0.844128	0.0186368
0.16697	0.850398	0.0184413
0.16748	0.858783	0.018707
0.16799	0.851658	0.018724
0.16849	0.839932	0.0187563
0.169	0.852909	0.0188054
0.16951	0.81625	0.0188736
0.17001	0.818213	0.0189703
0.17052	0.829232	0.0187659
0.17103	0.806524	0.0188895
0.17153	0.819484	0.0190487
0.17204	0.797641	0.0189499
0.17255	0.802658	0.018875
0.17305	0.790437	0.0189878
0.17356	0.810991	0.019132
0.17407	0.777173	0.018944
0.17457	0.762481	0.019037
0.17508	0.781805	0.0190594
0.17559	0.765964	0.0189563
0.1761	0.793589	0.0189042
0.1766	0.795777	0.0189884
0.17711	0.761449	0.01912
0.17762	0.760434	0.018838
0.17812	0.741117	0.0189415
0.17863	0.751488	0.0190905
0.17914	0.748099	0.0188928
0.17964	0.726879	0.0187468
0.18015	0.709058	0.0188076
0.18066	0.736926	0.0189279
0.18116	0.722695	0.0186711
0.18167	0.728528	0.0190196
0.18218	0.742059	0.0193231
0.18268	0.710618	0.0192637
0.18319	0.740546	0.0193083
0.1837	0.699825	0.0194179
0.1842	0.717459	0.0194667
0.18471	0.699948	0.0193648
0.18522	0.718752	0.019505
0.18572	0.717036	0.0195631
0.18623	0.699983	0.01963
0.18674	0.692717	0.0197122
0.18724	0.719368	0.0198173
0.18775	0.718322	0.0199901
0.18826	0.659321	0.0196872
0.18876	0.697593	0.0197667
0.18927	0.663102	0.0199446
0.18978	0.705357	0.0199789
0.19028	0.664086	0.0200175
0.19079	0.669423	0.019933
0.1913	0.650814	0.0201266
0.1918	0.735378	0.0199476
0.19231	0.674925	0.0199993
0.19282	0.667241	0.0201092
0.19332	0.692018	0.0201307
0.19383	0.667218	0.0200469
0.19434	0.66947	0.0201442
0.19484	0.614689	0.0201834
0.19535	0.613223	0.0200065
0.19586	0.660895	0.0201799
0.19636	0.643611	0.0203007
0.19687	0.64871	0.0202243
0.19738	0.650341	0.020139
0.19788	0.650107	0.0201997
0.19839	0.655452	0.0203405
0.1989	0.646379	0.0202296
0.1994	0.626368	0.0201484
0.19991	0.600441	0.0204201
0.20042	0.602347	0.0202993
0.20092	0.631954	0.0202127
0.20143	0.613574	0.0203394
0.20194	0.614079	0.0204595
0.20244	0.603071	0.0202707
0.20295	0.638784	0.0203433
0.20346	0.623468	0.0205632
0.20396	0.628933	0.0203412
0.20447	0.611567	0.0202219
0.20498	0.603613	0.0203913
0.20548	0.586703	0.0203677
0.20599	0.589234	0.0202466
0.2065	0.615879	0.0202424
0.207	0.600746	0.0204951
0.20751	0.566054	0.0203242
0.20802	0.575064	0.0202012
0.20852	0.579562	0.0204632
0.20903	0.564772	0.0204731
0.20954	0.607105	0.0200846
0.21004	0.580861	0.0200824
0.21055	0.601931	0.020364
0.21106	0.562639	0.020208
0.21156	0.546786	0.0201162
0.21207	0.549695	0.0202426
0.21258	0.560108	0.0204663
0.21308	0.581255	0.0201934
0.21359	0.569319	0.0201658
0.2141	0.541651	0.0203847
0.2146	0.581564	0.0202137
0.21511	0.56949	0.0201763
0.21562	0.56958	0.0202849
0.21612	0.557707	0.020331
0.21663	0.555066	0.0199369
0.21714	0.589817	0.020064
0.21764	0.582988	0.0203267
0.21815	0.528173	0.0200376
0.21866	0.566045	0.0199081
0.21916	0.516171	0.0201006
0.21967	0.526382	0.0200961
0.22018	0.549963	0.019839
0.22068	0.509962	0.0198825
0.22119	0.515597	0.0201318
0.2217	0.579088	0.0198229
0.2222	0.52084	0.0196811
0.22271	0.545599	0.0197559
0.22322	0.515615	0.0199185
0.22372	0.52214	0.0196013
0.22423	0.544864	0.0195893
0.22474	0.504901	0.0197626
0.22524	0.561411	0.0194749
0.22575	0.522124	0.0194023
0.22626	0.515218	0.0195095
0.22676	0.521793	0.019502
0.22727	0.534979	0.0192238
0.22778	0.515348	0.0192765
0.22828	0.492818	0.0193268
0.22879	0.516901	0.0191108
0.2293	0.513997	0.0190012
0.2298	0.520877	0.0191438
0.23031	0.519709	0.019069
0.23082	0.489392	0.0187196
0.23132	0.477648	0.0187953
0.23183	0.513524	0.0189734
0.23234	0.501184	0.018706
0.23284	0.506137	0.0187978
0.23335	0.511306	0.0187054
0.23386	0.478313	0.0188025
0.23436	0.490227	0.0184853
0.23487	0.51286	0.0182921
0.23538	0.490566	0.0184388
0.23588	0.485671	0.0182638
0.23639	0.484758	0.01825
0.2369	0.474812	0.0183406
0.2374	0.485039	0.0183962
0.23791	0.473356	0.0181348
0.23842	0.490857	0.0181626
0.23892	0.487798	0.0182626
0.23943	0.473726	0.0181596
0.23994	0.46665	0.0180722
0.24044	0.482296	0.0180753
0.24095	0.474907	0.0180652
0.24145	0.471191	0.0179433
0.24196	0.44369	0.017904
0.24247	0.465434	0.0180405
0.24297	0.443969	0.0177504
0.24348	0.477086	0.0178379
0.24399	0.442162	0.0178143
0.24449	0.461857	0.0177054
0.245	0.492139	0.0177035
0.24551	0.454012	0.0176521
0.24601	0.493864	0.017722
0.24652	0.462365	0.0175317
0.24703	0.453953	0.0174921
0.24753	0.46815	0.0175245
0.24804	0.451318	0.0175184
0.24855	0.455572	0.0173877
0.24905	0.44981	0.0175227
0.24956	0.458229	0.0174392
0.25007	0.446681	0.0172604
0.25057	0.45854	0.0173141
0.25108	0.464905	0.0172537
0.25159	0.433056	0.017313
0.25209	0.450186	0.0171628
0.2526	0.467086	0.0171916
0.25311	0.438253	0.0171903
0.25361	0.45755	0.017055
0.25412	0.4269	0.0170621
0.25463	0.42426	0.0171081
0.25513	0.423407	0.0170401
0.25564	0.453962	0.0169246
0.25615	0.447165	0.0168573
0.25665	0.437988	0.016822
0.25716	0.44905	0.0167905
0.25767	0.415063	0.0166601
0.25817	0.457064	0.0167672
0.25868	0.438032	0.0166684
0.25919	0.423759	0.0166031
0.25969	0.453388	0.0166728
0.2602	0.412168	0.0165151
0.26071	0.427841	0.0164636
0.26121	0.429015	0.0164432
0.26172	0.438424	0.0164868
0.26223	0.428478	0.0164522
0.26273	0.439692	0.0164099
0.26324	0.428902	0.0163485
0.26375	0.44675	0.0163218
0.26425	0.415194	0.0163519
0.26476	0.444311	0.0163196
0.26527	0.405696	0.016298
0.26577	0.419661	0.0163129
0.26628	0.384649	0.0162219
0.26679	0.413847	0.0161821
0.26729	0.401483	0.016171
0.2678	0.416178	0.0161947
0.26831	0.411923	0.0161136
0.26881	0.417844	0.0160595
0.26932	0.448194	0.0160783
0.26983	0.40021	0.0160226
0.27033	0.414583	0.016039
0.27084	0.418631	0.0160121
0.27134	0.426454	0.0159745
0.27185	0.402918	0.0158724
0.27236	0.382382	0.0158935
0.27286	0.392965	0.0159317
0.27337	0.405786	0.0159336
0.27388	0.392326	0.0157375
0.27438	0.382267	0.0158136
0.27489	0.408472	0.0157793
0.2754	0.401172	0.0156964
0.2759	0.402615	0.0156868
0.27641	0.409029	0.0157145
0.27692	0.389349	0.0157271
0.27742	0.393421	0.0155953
0.27793	0.407615	0.0156312
0.27844	0.391962	0.0156325
0.27894	0.399965	0.0155799
0.27945	0.398442	0.0156066
0.27996	0.420648	0.0156977
0.28046	0.397773	0.015556
0.28097	0.418806	0.015467
0.28148	0.409761	0.0154832
0.28198	0.399528	0.01552
0.28249	0.391954	0.0154214
0.283	0.386555	0.0154205
0.2835	0.379106	0.015484
0.28401	0.388747	0.0154187
0.28452	0.359846	0.0154462
0.28502	0.393027	0.0154009
0.28553	0.398041	0.0154247
0.28604	0.349212	0.0152792
0.28654	0.377252	0.0153075
0.28705	0.38517	0.015412
0.28756	0.376	0.0153117
0.28806	0.375214	0.0152797
0.28857	0.394997	0.0154032
0.28908	0.378383	0.0153851
0.28958	0.374073	0.0153343
0.29009	0.385986	0.0153008
0.29059	0.372298	0.0153222
0.2911	0.374548	0.0153278
0.29161	0.385991	0.0153546
0.29211	0.397154	0.0153976
0.29262	0.382342	0.0153869
0.29313	0.38332	0.0152709
0.29363	0.394115	0.0153809
0.29414	0.370415	0.0154054
0.29465	0.354402	0.0152816
0.29515	0.356105	0.0152751
0.29566	0.365289	0.0152736
0.29617	0.372644	0.0153321
0.29667	0.384144	0.0152201
0.29718	0.386147	0.0152867
0.29769	0.366428	0.0153209
0.29819	0.392957	0.0153176
0.2987	0.365084	0.0151842
0.29921	0.363018	0.0152684
0.29971	0.380595	0.0152364
0.30022	0.386693	0.0151766
0.30073	0.342547	0.0151931
0.30123	0.35741	0.0152172
0.30174	0.372047	0.0152288
0.30225	0.335827	0.0151344
0.30275	0.360094	0.0151402
0.30326	0.365022	0.015183
0.30377	0.350022	0.0150995
0.30427	0.360121	0.0150319
0.30478	0.35851	0.0149966
0.30529	0.35398	0.0151454
0.30579	0.356999	0.0150075
0.3063	0.346845	0.0148847
0.3068	0.352056	0.0149988
0.30731	0.367655	0.015102
0.30782	0.365267	0.015098
0.30832	0.35444	0.0151818
0.30883	0.390877	0.0152794
0.30934	0.343372	0.0151294
0.30984	0.347815	0.0151857
0.31035	0.348353	0.0153249
0.31086	0.361185	0.0152772
0.31136	0.328524	0.015364
0.31187	0.356009	0.0154691
0.31238	0.339169	0.0157015
0.31288	0.3657	0.0156679
0.31339	0.357973	0.0157437
0.3139	0.34516	0.015812
0.3144	0.353307	0.0158692
0.31491	0.341171	0.0158857
0.31542	0.346128	0.0158987
0.31592	0.335598	0.0160551
0.31643	0.340185	0.0159906
0.31694	0.332055	0.0159752
0.31744	0.340381	0.0160964
0.31795	0.348607	0.0161973
0.31845	0.32636	0.0160814
0.31896	0.333815	0.0160718
0.31947	0.344555	0.0162836
0.31997	0.342194	0.016179
0.32048	0.348067	0.0161805
0.32099	0.35426	0.0163511
0.32149	0.336754	0.0162222
0.322	0.33143	0.0161296
0.32251	0.319848	0.0160974
0.32301	0.331734	0.0162548
0.32352	0.352854	0.0162284
0.32403	0.338512	0.0161721
0.32453	0.320279	0.0161301
0.32504	0.35208	0.0161954
0.32555	0.319494	0.0160962
0.32605	0.3307	0.0161969
0.32656	0.35076	0.0161418
0.32707	0.354253	0.01628
0.32757	0.338367	0.0161598
0.32808	0.341171	0.0162325
0.32859	0.323511	0.0163661
0.32909	0.34503	0.0162243
0.3296	0.354203	0.0162888
0.3301	0.31009	0.0163806
0.33061	0.319901	0.0162909
0.33112	0.338223	0.0163049
0.33162	0.333175	0.0164044
0.33213	0.323047	0.0164095
0.33264	0.338386	0.0164007
0.33314	0.324597	0.0163592
0.33365	0.355752	0.0164635
0.33416	0.349968	0.0164494
0.33466	0.334893	0.016384
0.33517	0.305826	0.0164402
0.33568	0.301743	0.0165111
0.33618	0.308204	0.0165121
0.33669	0.330305	0.0164429
0.3372	0.323102	0.0164318
0.3377	0.327082	0.0165639
0.33821	0.337201	0.0164829
0.33872	0.305806	0.0164469
0.33922	0.298234	0.016631
0.33973	0.326282	0.0164858
0.34023	0.311904	0.0164806
0.34074	0.326906	0.0165392
0.34125	0.308339	0.0166306
0.34175	0.323697	0.0164784
0.34226	0.330321	0.0165763
0.34277	0.3404	0.0166949
0.34327	0.333962	0.0166026
0.34378	0.334811	0.0164865
0.34429	0.316631	0.0165931
0.34479	0.32852	0.0166789
0.3453	0.340214	0.0165378
0.34581	0.310295	0.0165659
0.34631	0.325531	0.0167442
0.34682	0.324079	0.0166638
0.34733	0.299504	0.0166974
0.34783	0.309765	0.0167439
0.34834	0.301727	0.0168472
0.34884	0.301395	0.016589
0.34935	0.322545	0.0166493
0.34986	0.277441	0.0167199
0.35036	0.313543	0.0167014
0.35087	0.329744	0.0165399
0.35138	0.300326	0.0166714
0.35188	0.315067	0.0167378
0.35239	0.284804	0.016572
0.3529	0.29486	0.0165326
0.3534	0.313335	0.0166495
0.35391	0.313385	0.0167065
0.35442	0.322729	0.0164884
0.35492	0.325643	0.0162592
0.35543	0.289039	0.0161545
0.35594	0.297536	0.0160987
0.35644	0.321022	0.0158229
0.35695	0.304411	0.0158952
0.35745	0.294104	0.015806
0.35796	0.295728	0.0154526
0.35847	0.318496	0.0157051
0.35897	0.300678	0.0159209
0.35948	0.309646	0.015907
0.35999	0.305672	0.0158697
0.36049	0.285331	0.0159874
0.361	0.28722	0.0161226
0.36151	0.290047	0.0159719
0.36201	0.289208	0.0160484
0.36252	0.321703	0.016277
0.36303	0.3062	0.0161876
0.36353	0.31892	0.0160388
0.36404	0.306658	0.0162955
0.36455	0.297994	0.0163702
0.36505	0.33519	0.0162422
0.36556	0.297272	0.0162885
0.36606	0.321628	0.0163695
0.36657	0.290379	0.0164391
0.36708	0.296459	0.0163011
0.36758	0.281111	0.0165477
0.36809	0.308659	0.0165806
0.3686	0.285283	0.0165987
0.3691	0.313335	0.0168179
0.36961	0.29724	0.0170049
0.37012	0.29526	0.0171621
0.37062	0.354111	0.0171859
0.37113	0.301543	0.0172989
0.37164	0.290184	0.0174367
0.37214	0.277568	0.0172533
0.37265	0.304838	0.0172466
0.37315	0.314856	0.0173194
0.37366	0.2902	0.0171956
0.37417	0.291527	0.0171299
0.37467	0.300932	0.0172563
0.37518	0.285607	0.0175405
0.37569	0.265915	0.017486
0.37619	0.280398	0.0174073
0.3767	0.321063	0.0175448
0.37721	0.276014	0.0177705
0.37771	0.280675	0.0176707
0.37822	0.314662	0.0177782
0.37873	0.303922	0.0179722
0.37923	0.283711	0.0179904
0.37974	0.261659	0.0178907
0.38024	0.302117	0.0181887
0.38075	0.305205	0.0181964
0.38126	0.296546	0.018131
0.38176	0.305936	0.0182325
0.38227	0.303767	0.0184416
0.38278	0.287145	0.0186184
0.38328	0.283275	0.0183405
0.38379	0.303013	0.0184944
0.3843	0.313832	0.0187053
0.3848	0.291859	0.018812
0.38531	0.268266	0.0186879
0.38582	0.309678	0.018938
0.38632	0.29546	0.018936
0.38683	0.305784	0.0190171
0.38733	0.277973	0.0190347
0.38784	0.309512	0.0191249
0.38835	0.28441	0.0193209
0.38885	0.270265	0.0191428
0.38936	0.28801	0.0194288
0.38987	0.318413	0.0193645
0.39037	0.263245	0.0195151
0.39088	0.249152	0.0195339
0.39139	0.306437	0.0196421
0.39189	0.307903	0.0199072
0.3924	0.317157	0.0199712
0.3929	0.299861	0.0199103
0.39341	0.284065	0.0199408
0.39392	0.266996	0.0203487
0.39442	0.287043	0.0200841
0.39493	0.270437	0.0202762
0.39544	0.287652	0.0204237
0.39594	0.273022	0.020459
0.39645	0.286303	0.0213889
0.39696	0.330076	0.020659
0.39746	0.246069	0.0207855
0.39797	0.277938	0.0205849
0.39847	0.269168	0.0209711
0.39898	0.292994	0.0210655
0.39949	0.294466	0.021042
0.39999	0.276115	0.020986
0.4005	0.28989	0.0213182
0.40101	0.255637	0.0215499
0.40151	0.294727	0.0213408
0.40202	0.308948	0.0215756
0.40253	0.282962	0.0216246
0.40303	0.2931	0.0218754
0.40354	0.2584	0.0215311
0.40405	0.263505	0.0217843
0.40455	0.255926	0.0218944
0.40506	0.306238	0.0219485
0.40556	0.251578	0.021875
0.40607	0.284167	0.0220538
0.40658	0.253794	0.0222791
0.40708	0.269437	0.0219582
0.40759	0.262365	0.0220169
0.4081	0.284442	0.0225282
0.4086	0.242812	0.0222341
0.40911	0.298395	0.02212
0.40962	0.322918	0.0223061
0.41012	0.31755	0.02275
0.41063	0.293882	0.0222435
0.41113	0.26764	0.0223701
0.41164	0.283027	0.022906
0.41215	0.268347	0.0227143
0.41265	0.295078	0.0223482
0.41316	0.251843	0.0228111
0.41367	0.272835	0.0230465
0.41417	0.274727	0.0228458
0.41468	0.259284	0.0229021
0.41518	0.296943	0.0231805
0.41569	0.269908	0.0233158
0.4162	0.285463	0.0228893
0.4167	0.281456	0.0232293
0.41721	0.270395	0.0236262
0.41772	0.231953	0.0233379
0.41822	0.223604	0.0232769
0.41873	0.25409	0.0234362
0.41924	0.286266	0.0239881
0.41974	0.264123	0.0235943
0.42025	0.26663	0.0236772
0.42075	0.27864	0.0242423
0.42126	0.250191	0.0241255
0.42177	0.258096	0.0238567
0.42227	0.264873	0.0243171
0.42278	0.271487	0.0246981
0.42329	0.275545	0.0244828
0.42379	0.268401	0.0243769
0.4243	0.305671	0.0249709
0.42481	0.273238	0.0255603
0.42531	0.286265	0.024758
0.42582	0.284421	0.0252168
0.42632	0.24471	0.0258655
0.42683	0.303016	0.0255875
0.42734	0.25619	0.0255211
0.42784	0.255545	0.0258599
0.42835	0.270682	0.0264865
0.42886	0.273486	0.02628
0.42936	0.264235	0.026219
0.42987	0.277022	0.0268735
0.43037	0.309801	0.0273332
0.43088	0.262364	0.0266926
0.43139	0.28546	0.0270789
0.43189	0.240987	0.0281349
0.4324	0.252595	0.0276394
0.43291	0.273012	0.0276106
0.43341	0.296719	0.0280852
0.43392	0.236843	0.0288439
0.43443	0.276508	0.028154
0.43493	0.265163	0.0286787
0.43544	0.258057	0.029287
0.43594	0.30784	0.0294669
0.43645	0.281489	0.0293147
0.43696	0.221554	0.0296589
0.43746	0.221835	0.0302678
0.43797	0.336064	0.0300901
0.43848	0.252805	0.0303661
0.43898	0.266737	0.0306224
0.43949	0.235133	0.0314237
0.43999	0.246197	0.0310672

## Sheet: 500_Sucrose
Q	I(Q)	Error
0.0114	50.1278	11.0918
0.01191	45.4671	8.78142
0.01242	43.9089	7.29712
0.01292	40.2817	5.62462
0.01343	38.3275	3.90821
0.01394	35.4545	3.26964
0.01444	33.0403	2.12879
0.01495	31.3206	1.44618
0.01546	30.2159	1.05658
0.01596	29.1337	0.774657
0.01647	28.0174	0.594609
0.01698	26.8257	0.485105
0.01748	25.737	0.391504
0.01799	24.6055	0.27521
0.0185	23.783	0.21495
0.019	22.919	0.182443
0.01951	22.0571	0.142939
0.02002	21.3906	0.130748
0.02052	20.8756	0.112517
0.02103	20.0786	0.0979151
0.02154	19.4578	0.0904854
0.02204	18.8317	0.0868054
0.02255	18.3474	0.0784366
0.02306	17.7979	0.0725542
0.02356	17.156	0.0679094
0.02407	16.6609	0.065801
0.02458	16.2839	0.061157
0.02509	15.8465	0.0588079
0.02559	15.482	0.0576149
0.0261	14.9496	0.0539316
0.02661	14.6486	0.0533689
0.02711	14.2217	0.0528375
0.02762	13.9666	0.0512675
0.02813	13.6738	0.0492808
0.02863	13.3065	0.0488679
0.02914	12.9858	0.0482665
0.02965	12.7393	0.0472588
0.03015	12.3652	0.0459249
0.03066	12.127	0.0452899
0.03117	11.9144	0.0442297
0.03167	11.6065	0.0437432
0.03218	11.334	0.0429607
0.03269	11.0781	0.0429491
0.03319	10.7871	0.0410896
0.0337	10.6385	0.0415157
0.03421	10.3959	0.0413903
0.03471	10.1534	0.0404522
0.03522	9.88706	0.0394169
0.03573	9.75914	0.0394955
0.03623	9.45594	0.0391979
0.03674	9.33718	0.0383896
0.03725	9.07365	0.0377507
0.03775	8.88381	0.0368247
0.03826	8.6418	0.0364774
0.03877	8.48952	0.0359608
0.03927	8.30004	0.0359368
0.03978	8.10502	0.0360237
0.04029	7.9756	0.0348532
0.0408	7.75195	0.0348934
0.0413	7.59554	0.0350703
0.04181	7.43511	0.034356
0.04232	7.26914	0.0339681
0.04282	7.12266	0.0335961
0.04333	7.01089	0.0333786
0.04384	6.85562	0.0327559
0.04434	6.7382	0.0328342
0.04485	6.57343	0.0324901
0.04536	6.46317	0.0321627
0.04586	6.40349	0.0316672
0.04637	6.2567	0.0320809
0.04688	6.14123	0.0314899
0.04738	6.04176	0.0307896
0.04789	5.92331	0.0308699
0.0484	5.77687	0.0309481
0.0489	5.69999	0.0303404
0.04941	5.59638	0.0301547
0.04992	5.47695	0.0297892
0.05042	5.48137	0.0297475
0.05093	5.30603	0.0290731
0.05144	5.23318	0.0290648
0.05194	5.13392	0.028712
0.05245	5.02734	0.027979
0.05296	4.98189	0.0279451
0.05346	4.95293	0.0279212
0.05397	4.84197	0.0278514
0.05448	4.75655	0.0271817
0.05498	4.69974	0.0270057
0.05549	4.60198	0.027373
0.056	4.50058	0.0269124
0.0565	4.47257	0.0268446
0.05701	4.39569	0.026684
0.05752	4.34454	0.0264729
0.05803	4.30166	0.0264068
0.05853	4.1961	0.0262354
0.05904	4.17382	0.0264229
0.05955	4.1322	0.0255836
0.06005	4.11134	0.0258056
0.06056	4.04561	0.0257854
0.06107	4.06409	0.0256905
0.06157	4.02727	0.0252748
0.06208	4.02733	0.0253046
0.06259	4.00205	0.0252686
0.06309	3.99952	0.0249588
0.0636	4.00091	0.024875
0.06411	3.98384	0.0249429
0.06461	4.04615	0.0244396
0.06512	3.95421	0.0246743
0.06563	3.9696	0.0243306
0.06613	3.95109	0.0244429
0.06664	3.86026	0.023922
0.06715	3.82972	0.0239413
0.06765	3.73472	0.0238935
0.06816	3.65751	0.0237163
0.06867	3.58491	0.0235396
0.06917	3.49539	0.0233754
0.06968	3.35316	0.0234622
0.07019	3.30614	0.023146
0.07069	3.201	0.0229229
0.0712	3.15597	0.0230987
0.07171	3.11315	0.0227687
0.07221	3.04698	0.0225806
0.07272	3.02819	0.0227893
0.07323	2.96773	0.0225228
0.07373	2.88393	0.0222472
0.07424	2.86319	0.0221262
0.07475	2.80799	0.0223571
0.07526	2.75381	0.0219399
0.07576	2.76941	0.0217991
0.07627	2.70636	0.0216762
0.07678	2.65412	0.0217214
0.07728	2.60642	0.0214917
0.07779	2.60963	0.021552
0.0783	2.56895	0.02146
0.0788	2.54871	0.02157
0.07931	2.48724	0.021496
0.07982	2.49039	0.0218965
0.08032	2.4839	0.0217923
0.08083	2.4145	0.021693
0.08134	2.4187	0.0217556
0.08184	2.39022	0.0219769
0.08235	2.35542	0.0216845
0.08286	2.33499	0.0217384
0.08336	2.27294	0.0221107
0.08387	2.2733	0.0217033
0.08438	2.25439	0.021637
0.08488	2.22922	0.0216921
0.08539	2.21906	0.0218874
0.0859	2.15569	0.021558
0.0864	2.18145	0.0215132
0.08691	2.10693	0.0218262
0.08742	2.08619	0.0215614
0.08792	2.09324	0.0214396
0.08843	2.10429	0.0214174
0.08894	2.01478	0.0217163
0.08944	2.0101	0.021396
0.08995	1.97955	0.0213579
0.09046	1.96937	0.0215811
0.09096	1.97943	0.021341
0.09147	1.93672	0.0209857
0.09198	1.92371	0.0208223
0.09248	1.86047	0.0209847
0.09299	1.89064	0.0206761
0.0935	1.84398	0.0208761
0.09401	1.84268	0.0210975
0.09451	1.8452	0.02097
0.09502	1.78646	0.0210042
0.09553	1.7901	0.0208562
0.09603	1.75816	0.0210857
0.09654	1.79047	0.020864
0.09705	1.74207	0.0208946
0.09755	1.73962	0.0209915
0.09806	1.69301	0.0208236
0.09857	1.70646	0.0208086
0.09907	1.71567	0.0208368
0.09958	1.65199	0.0208728
0.10009	1.65333	0.0205063
0.10059	1.64211	0.0206675
0.1011	1.61646	0.0210285
0.10161	1.61855	0.0207591
0.10211	1.5758	0.0208839
0.10262	1.59171	0.0210739
0.10313	1.57002	0.0210473
0.10363	1.55176	0.0204343
0.10414	1.53381	0.0202399
0.10465	1.51732	0.0203227
0.10515	1.51119	0.0199253
0.10566	1.46352	0.019969
0.10617	1.45764	0.0203422
0.10667	1.47134	0.0200034
0.10718	1.4852	0.0198347
0.10769	1.45841	0.019639
0.10819	1.45237	0.0197077
0.1087	1.44093	0.0192319
0.10921	1.4035	0.0193282
0.10971	1.38536	0.0192265
0.11022	1.38456	0.0188909
0.11073	1.37887	0.0188294
0.11123	1.36391	0.0188212
0.11174	1.34891	0.018827
0.11225	1.32872	0.0186156
0.11275	1.32905	0.0184567
0.11326	1.29732	0.0186503
0.11377	1.32218	0.0184127
0.11428	1.31443	0.0181514
0.11478	1.29673	0.018276
0.11529	1.27791	0.0181853
0.1158	1.26696	0.0179843
0.1163	1.25025	0.0179886
0.11681	1.26126	0.0180861
0.11732	1.24174	0.0177155
0.11782	1.23607	0.0179053
0.11833	1.22352	0.0176657
0.11884	1.2395	0.0178266
0.11934	1.23105	0.0175887
0.11985	1.19244	0.0174606
0.12036	1.20499	0.0175398
0.12086	1.17963	0.017346
0.12137	1.17694	0.0173624
0.12188	1.15969	0.0173534
0.12238	1.14484	0.0172209
0.12289	1.13472	0.0171525
0.1234	1.11925	0.0171892
0.1239	1.13321	0.0171677
0.12441	1.1599	0.0168537
0.12492	1.11978	0.0169576
0.12542	1.11096	0.0169366
0.12593	1.08889	0.0168618
0.12644	1.10659	0.0165861
0.12694	1.09456	0.0165169
0.12745	1.06204	0.0166873
0.12796	1.08338	0.0164487
0.12846	1.05899	0.0165238
0.12897	1.08014	0.0163777
0.12948	1.07043	0.0162522
0.12998	1.04963	0.0162294
0.13049	1.04618	0.0162842
0.131	1.03883	0.0163043
0.1315	1.02468	0.0161093
0.13201	1.02248	0.0160911
0.13252	1.00124	0.016031
0.13302	1.01298	0.015969
0.13353	1.03294	0.015862
0.13404	0.992943	0.0158116
0.13454	1.00915	0.0158637
0.13505	0.994084	0.015787
0.13556	0.985814	0.0157816
0.13606	0.954634	0.0156601
0.13657	0.960904	0.015624
0.13708	0.969676	0.0157445
0.13758	0.952819	0.0155767
0.13809	0.925445	0.0155913
0.1386	0.941829	0.0154529
0.13911	0.920025	0.0154544
0.13961	0.895408	0.0154708
0.14012	0.894117	0.015432
0.14063	0.915492	0.0152488
0.14113	0.928162	0.0152332
0.14164	0.892389	0.0151581
0.14215	0.886977	0.0152364
0.14265	0.867939	0.0151798
0.14316	0.905584	0.0151406
0.14367	0.889338	0.0151257
0.14417	0.884402	0.0150609
0.14468	0.869397	0.0149926
0.14519	0.862423	0.0150756
0.14569	0.863112	0.014988
0.1462	0.867178	0.0148428
0.14671	0.846049	0.0149065
0.14721	0.859197	0.0148753
0.14772	0.842311	0.0148828
0.14823	0.84502	0.0148061
0.14873	0.83083	0.0147934
0.14924	0.836331	0.0147408
0.14975	0.790533	0.0147476
0.15025	0.801507	0.0146945
0.15076	0.798362	0.0146637
0.15127	0.817274	0.0145687
0.15177	0.807632	0.014647
0.15228	0.804682	0.0146247
0.15279	0.774712	0.0145026
0.15329	0.758464	0.0144232
0.1538	0.74816	0.0144988
0.15431	0.785409	0.0143646
0.15481	0.77256	0.0143851
0.15532	0.762182	0.0143006
0.15583	0.765245	0.014273
0.15633	0.754606	0.0142696
0.15684	0.757299	0.0141924
0.15735	0.750209	0.0142786
0.15785	0.739237	0.014184
0.15836	0.744991	0.0139692
0.15887	0.7321	0.0140206
0.15937	0.720026	0.0140311
0.15988	0.72588	0.0139694
0.16039	0.714727	0.013911
0.16089	0.733407	0.0139873
0.1614	0.720063	0.0139555
0.16191	0.714364	0.013858
0.16241	0.687787	0.0138362
0.16292	0.705284	0.0138753
0.16343	0.698903	0.0137952
0.16393	0.68169	0.013719
0.16444	0.691599	0.0138636
0.16495	0.688926	0.0136947
0.16545	0.680641	0.0136569
0.16596	0.674993	0.0136755
0.16647	0.687723	0.0136861
0.16697	0.655266	0.0135705
0.16748	0.655497	0.0137383
0.16799	0.662215	0.0138015
0.16849	0.657065	0.0138386
0.169	0.676732	0.0138494
0.16951	0.662055	0.0138943
0.17001	0.643688	0.0139252
0.17052	0.647871	0.0138332
0.17103	0.67015	0.0139238
0.17153	0.650835	0.0139759
0.17204	0.656288	0.0139818
0.17255	0.65725	0.0139369
0.17305	0.646141	0.0139696
0.17356	0.666328	0.0140252
0.17407	0.674236	0.0139047
0.17457	0.645266	0.0139398
0.17508	0.632821	0.0139786
0.17559	0.6184	0.0139937
0.1761	0.642831	0.013891
0.1766	0.652889	0.0139633
0.17711	0.607895	0.0140782
0.17762	0.633454	0.0138646
0.17812	0.617585	0.0139678
0.17863	0.603569	0.0140699
0.17914	0.609954	0.0139235
0.17964	0.628392	0.0138146
0.18015	0.626708	0.0138453
0.18066	0.610796	0.0139694
0.18116	0.590278	0.0137843
0.18167	0.570626	0.0139798
0.18218	0.599613	0.0142076
0.18268	0.598749	0.0142149
0.18319	0.597957	0.01422
0.1837	0.593757	0.0142916
0.1842	0.583058	0.014346
0.18471	0.592063	0.0142686
0.18522	0.597855	0.0143656
0.18572	0.601841	0.0144661
0.18623	0.573862	0.0144564
0.18674	0.568805	0.0144867
0.18724	0.588976	0.0145871
0.18775	0.574137	0.0146702
0.18826	0.595874	0.014502
0.18876	0.561701	0.0145555
0.18927	0.575592	0.014711
0.18978	0.55179	0.0146358
0.19028	0.570667	0.0146818
0.19079	0.586501	0.0147051
0.1913	0.569406	0.0148436
0.1918	0.578613	0.0147117
0.19231	0.567623	0.0147345
0.19282	0.574833	0.014796
0.19332	0.560373	0.0148139
0.19383	0.589387	0.0148294
0.19434	0.549239	0.0148423
0.19484	0.565785	0.0149222
0.19535	0.554575	0.0148229
0.19586	0.541431	0.0148469
0.19636	0.544464	0.01498
0.19687	0.543246	0.0148734
0.19738	0.55662	0.0148759
0.19788	0.547042	0.0148926
0.19839	0.535053	0.0150077
0.1989	0.529136	0.0149173
0.1994	0.556337	0.0148929
0.19991	0.556449	0.0151204
0.20042	0.53921	0.014952
0.20092	0.535043	0.0148788
0.20143	0.54931	0.0150196
0.20194	0.517893	0.0151673
0.20244	0.522478	0.0149257
0.20295	0.540424	0.0149888
0.20346	0.514421	0.015141
0.20396	0.529984	0.0150578
0.20447	0.509371	0.0149708
0.20498	0.52584	0.0149484
0.20548	0.523244	0.0150448
0.20599	0.507315	0.0149018
0.2065	0.4876	0.0149862
0.207	0.496305	0.0151023
0.20751	0.51216	0.0149785
0.20802	0.534427	0.0149689
0.20852	0.511722	0.0150965
0.20903	0.485473	0.0150955
0.20954	0.478112	0.0148095
0.21004	0.496499	0.0147405
0.21055	0.487887	0.0150633
0.21106	0.490156	0.0149267
0.21156	0.499584	0.0148563
0.21207	0.482172	0.0149569
0.21258	0.483591	0.0150678
0.21308	0.476559	0.0149025
0.21359	0.507678	0.0149715
0.2141	0.495425	0.0149492
0.2146	0.461208	0.0149246
0.21511	0.48015	0.014904
0.21562	0.488378	0.0149241
0.21612	0.458628	0.0149956
0.21663	0.479514	0.0147438
0.21714	0.472987	0.0148037
0.21764	0.440248	0.0149731
0.21815	0.441299	0.0147573
0.21866	0.466083	0.0147034
0.21916	0.470594	0.0148198
0.21967	0.462888	0.0148665
0.22018	0.454862	0.0146371
0.22068	0.472915	0.014729
0.22119	0.454969	0.0147952
0.2217	0.452375	0.0146657
0.2222	0.463274	0.0145868
0.22271	0.470052	0.0145941
0.22322	0.430127	0.0147324
0.22372	0.456155	0.0144381
0.22423	0.44582	0.0144198
0.22474	0.465915	0.0145707
0.22524	0.44737	0.0144025
0.22575	0.436053	0.0142856
0.22626	0.456869	0.014431
0.22676	0.447569	0.0143871
0.22727	0.435829	0.0142452
0.22778	0.446272	0.0142765
0.22828	0.432859	0.0142961
0.22879	0.419273	0.0141368
0.2293	0.460868	0.0139886
0.2298	0.433111	0.0141378
0.23031	0.43759	0.0141035
0.23082	0.454475	0.0137774
0.23132	0.438681	0.0139392
0.23183	0.4161	0.0139829
0.23234	0.419315	0.0138009
0.23284	0.419958	0.0138717
0.23335	0.41102	0.0137782
0.23386	0.438887	0.0138464
0.23436	0.410764	0.0135988
0.23487	0.393781	0.0136206
0.23538	0.392237	0.0136568
0.23588	0.425391	0.0135457
0.23639	0.401145	0.0135006
0.2369	0.418505	0.013594
0.2374	0.431757	0.0135705
0.23791	0.40857	0.0133825
0.23842	0.410408	0.0134356
0.23892	0.401358	0.0134776
0.23943	0.423868	0.0133864
0.23994	0.411238	0.013388
0.24044	0.409386	0.0133579
0.24095	0.415787	0.0133397
0.24145	0.40548	0.013219
0.24196	0.403186	0.0132608
0.24247	0.396269	0.0132834
0.24297	0.40134	0.0131183
0.24348	0.411358	0.013179
0.24399	0.399508	0.0131907
0.24449	0.401931	0.0130955
0.245	0.41234	0.0130612
0.24551	0.37926	0.0130297
0.24601	0.404673	0.0130738
0.24652	0.390346	0.0129615
0.24703	0.386267	0.0129635
0.24753	0.390622	0.0129892
0.24804	0.377037	0.0129837
0.24855	0.385634	0.012876
0.24905	0.393298	0.0129326
0.24956	0.376673	0.012906
0.25007	0.372188	0.0127753
0.25057	0.382385	0.0128504
0.25108	0.393629	0.0128031
0.25159	0.389357	0.0128165
0.25209	0.385233	0.0126689
0.2526	0.384143	0.0127181
0.25311	0.39925	0.0127074
0.25361	0.37254	0.0125686
0.25412	0.376042	0.0125923
0.25463	0.379823	0.012621
0.25513	0.389017	0.0125958
0.25564	0.380766	0.0124683
0.25615	0.371099	0.0124288
0.25665	0.357648	0.0124202
0.25716	0.382851	0.0123975
0.25767	0.377392	0.0123303
0.25817	0.361961	0.0123881
0.25868	0.369745	0.012406
0.25919	0.38052	0.0123019
0.25969	0.362929	0.0123275
0.2602	0.389537	0.0122409
0.26071	0.3781	0.0122245
0.26121	0.35793	0.0121925
0.26172	0.384053	0.0122045
0.26223	0.353156	0.0121648
0.26273	0.367733	0.0121311
0.26324	0.365286	0.0121237
0.26375	0.368268	0.0120677
0.26425	0.360529	0.0121041
0.26476	0.367422	0.012084
0.26527	0.367463	0.0120205
0.26577	0.347176	0.0120472
0.26628	0.366943	0.0119925
0.26679	0.373831	0.0119616
0.26729	0.358524	0.0119763
0.2678	0.37367	0.0120057
0.26831	0.386911	0.0119339
0.26881	0.378458	0.0119073
0.26932	0.354555	0.0119085
0.26983	0.374224	0.0118909
0.27033	0.337505	0.0118622
0.27084	0.354818	0.0118425
0.27134	0.356342	0.0118207
0.27185	0.355964	0.011756
0.27236	0.347125	0.0117775
0.27286	0.335275	0.0117831
0.27337	0.374881	0.011792
0.27388	0.349699	0.0116805
0.27438	0.352592	0.011711
0.27489	0.348575	0.0117004
0.2754	0.363997	0.0116462
0.2759	0.358032	0.0116432
0.27641	0.343924	0.0116158
0.27692	0.336889	0.0116288
0.27742	0.339667	0.0115587
0.27793	0.338468	0.0115937
0.27844	0.356058	0.0116031
0.27894	0.328283	0.0115535
0.27945	0.346273	0.0115706
0.27996	0.344224	0.0116022
0.28046	0.343106	0.0115116
0.28097	0.353048	0.0114597
0.28148	0.33456	0.0114815
0.28198	0.337464	0.011492
0.28249	0.33626	0.0114397
0.283	0.33108	0.0114357
0.2835	0.321427	0.0114906
0.28401	0.319493	0.0114352
0.28452	0.345233	0.011429
0.28502	0.327076	0.0114332
0.28553	0.326251	0.0114386
0.28604	0.342677	0.0113333
0.28654	0.316328	0.0113653
0.28705	0.339094	0.011417
0.28756	0.329919	0.0113745
0.28806	0.347751	0.0113378
0.28857	0.331634	0.0114045
0.28908	0.311811	0.011428
0.28958	0.328956	0.011354
0.29009	0.330079	0.011343
0.29059	0.329854	0.0113818
0.2911	0.325756	0.0113619
0.29161	0.322196	0.0113642
0.29211	0.332723	0.0113913
0.29262	0.33397	0.0114363
0.29313	0.308345	0.0113547
0.29363	0.318361	0.0113784
0.29414	0.314589	0.0114019
0.29465	0.328152	0.0113611
0.29515	0.324993	0.0113329
0.29566	0.320218	0.011335
0.29617	0.314573	0.011412
0.29667	0.31313	0.0113202
0.29718	0.305607	0.0113078
0.29769	0.327979	0.0113603
0.29819	0.308842	0.0113344
0.2987	0.302615	0.0112544
0.29921	0.321452	0.0112898
0.29971	0.306809	0.0113129
0.30022	0.307837	0.0112706
0.30073	0.296967	0.011278
0.30123	0.31812	0.0112821
0.30174	0.306311	0.0113245
0.30225	0.305388	0.0112346
0.30275	0.297527	0.0112096
0.30326	0.312061	0.0112508
0.30377	0.303863	0.0111936
0.30427	0.321454	0.0111807
0.30478	0.299799	0.0111219
0.30529	0.309087	0.0111928
0.30579	0.304964	0.011116
0.3063	0.322793	0.0110749
0.3068	0.29635	0.0111276
0.30731	0.302022	0.0111828
0.30782	0.301558	0.0111881
0.30832	0.313083	0.0112905
0.30883	0.294856	0.0113273
0.30934	0.297859	0.011257
0.30984	0.287228	0.011276
0.31035	0.301188	0.0113718
0.31086	0.307098	0.0113352
0.31136	0.291384	0.0114222
0.31187	0.313321	0.0115063
0.31238	0.300932	0.0116578
0.31288	0.291349	0.01164
0.31339	0.29842	0.011678
0.3139	0.284027	0.0117583
0.3144	0.290845	0.011775
0.31491	0.30025	0.0118343
0.31542	0.276812	0.0117874
0.31592	0.295482	0.0119576
0.31643	0.282044	0.0119003
0.31694	0.272596	0.0118864
0.31744	0.272175	0.0120195
0.31795	0.310765	0.012037
0.31845	0.283826	0.0119623
0.31896	0.27445	0.0119727
0.31947	0.273625	0.0120476
0.31997	0.277502	0.01197
0.32048	0.28341	0.0119999
0.32099	0.275735	0.0121639
0.32149	0.304409	0.0120491
0.322	0.288926	0.0119741
0.32251	0.279582	0.0119659
0.32301	0.272498	0.0120756
0.32352	0.3067	0.0120638
0.32403	0.268213	0.0120357
0.32453	0.271809	0.0120313
0.32504	0.293824	0.012094
0.32555	0.278405	0.0119611
0.32605	0.267373	0.0120479
0.32656	0.275301	0.012049
0.32707	0.286052	0.0120553
0.32757	0.280347	0.0120227
0.32808	0.274027	0.0120622
0.32859	0.272636	0.0121643
0.32909	0.260274	0.0120309
0.3296	0.281738	0.01208
0.3301	0.270327	0.0121755
0.33061	0.274227	0.0121284
0.33112	0.294159	0.0120933
0.33162	0.266233	0.012169
0.33213	0.281459	0.0122376
0.33264	0.272554	0.0121419
0.33314	0.28909	0.0121371
0.33365	0.271846	0.0122601
0.33416	0.268246	0.0122192
0.33466	0.261565	0.0121646
0.33517	0.261999	0.0122178
0.33568	0.276626	0.0122852
0.33618	0.263541	0.0122292
0.33669	0.292642	0.0122082
0.3372	0.284162	0.0122487
0.3377	0.274224	0.0123197
0.33821	0.27634	0.0122422
0.33872	0.279852	0.0122519
0.33922	0.237114	0.0123354
0.33973	0.25782	0.0122867
0.34023	0.277587	0.0122768
0.34074	0.250835	0.0123618
0.34125	0.27917	0.0123348
0.34175	0.247193	0.0122951
0.34226	0.274202	0.0123187
0.34277	0.256721	0.0123808
0.34327	0.260634	0.0123292
0.34378	0.281741	0.0122722
0.34429	0.270192	0.0123562
0.34479	0.265454	0.0124504
0.3453	0.282356	0.0123162
0.34581	0.265529	0.0123272
0.34631	0.265622	0.0124443
0.34682	0.250256	0.0124177
0.34733	0.255105	0.0123934
0.34783	0.253798	0.012477
0.34834	0.261306	0.0125445
0.34884	0.253437	0.0123518
0.34935	0.244415	0.0124107
0.34986	0.261669	0.0124157
0.35036	0.266404	0.0124515
0.35087	0.264297	0.012304
0.35138	0.263781	0.012427
0.35188	0.270437	0.0124505
0.35239	0.258505	0.0123476
0.3529	0.245088	0.0123415
0.3534	0.260142	0.0124474
0.35391	0.249673	0.0124242
0.35442	0.251183	0.0122514
0.35492	0.269606	0.0121276
0.35543	0.236087	0.0119922
0.35594	0.253776	0.0119742
0.35644	0.249691	0.0117983
0.35695	0.230331	0.0117945
0.35745	0.25583	0.0117836
0.35796	0.259104	0.0115441
0.35847	0.25298	0.0116908
0.35897	0.257297	0.0118246
0.35948	0.246536	0.0118363
0.35999	0.244258	0.0118395
0.36049	0.244297	0.0118935
0.361	0.243487	0.0119804
0.36151	0.247465	0.0119037
0.36201	0.256176	0.0119092
0.36252	0.248884	0.0121109
0.36303	0.250831	0.0120921
0.36353	0.244763	0.0119633
0.36404	0.263658	0.0121652
0.36455	0.257273	0.0121985
0.36505	0.261587	0.0121437
0.36556	0.241221	0.0121077
0.36606	0.253524	0.0122065
0.36657	0.248989	0.012274
0.36708	0.242204	0.0121658
0.36758	0.259371	0.012321
0.36809	0.256544	0.0123935
0.3686	0.263401	0.0123739
0.3691	0.244493	0.0124994
0.36961	0.227435	0.0126986
0.37012	0.252528	0.0127781
0.37062	0.243273	0.0128156
0.37113	0.244292	0.0128783
0.37164	0.247291	0.0129785
0.37214	0.21947	0.012876
0.37265	0.237046	0.0128614
0.37315	0.264602	0.012896
0.37366	0.242708	0.0128716
0.37417	0.237148	0.0128037
0.37467	0.247604	0.0128456
0.37518	0.234496	0.0130292
0.37569	0.23964	0.0130563
0.37619	0.240743	0.0129755
0.3767	0.238161	0.0131357
0.37721	0.243918	0.0132123
0.37771	0.22856	0.0131789
0.37822	0.233566	0.0132554
0.37873	0.255225	0.013381
0.37923	0.246784	0.0134337
0.37974	0.232386	0.013388
0.38024	0.242979	0.0135548
0.38075	0.256559	0.0135538
0.38126	0.224013	0.0135467
0.38176	0.237538	0.0135496
0.38227	0.233702	0.0137199
0.38278	0.239461	0.0138127
0.38328	0.226648	0.0136889
0.38379	0.254881	0.0138423
0.3843	0.238265	0.0139297
0.3848	0.239325	0.0139992
0.38531	0.210538	0.0139522
0.38582	0.237661	0.0140927
0.38632	0.261617	0.0141004
0.38683	0.243118	0.0141667
0.38733	0.23999	0.0142141
0.38784	0.238264	0.014268
0.38835	0.257345	0.0143233
0.38885	0.245021	0.0143027
0.38936	0.254218	0.0145232
0.38987	0.231143	0.0144885
0.39037	0.244484	0.0146825
0.39088	0.2445	0.0145602
0.39139	0.232565	0.0146868
0.39189	0.218003	0.0148564
0.3924	0.233571	0.0148351
0.3929	0.234026	0.0148264
0.39341	0.226914	0.0149456
0.39392	0.246686	0.0151066
0.39442	0.223334	0.0150875
0.39493	0.260468	0.015146
0.39544	0.240473	0.0152437
0.39594	0.218061	0.0152666
0.39645	0.226885	0.0161265
0.39696	0.237983	0.0155126
0.39746	0.23547	0.015524
0.39797	0.241376	0.0155311
0.39847	0.245735	0.0156924
0.39898	0.24267	0.0156914
0.39949	0.217652	0.015727
0.39999	0.240618	0.0157868
0.4005	0.230235	0.0158965
0.40101	0.239492	0.0160742
0.40151	0.229325	0.0158991
0.40202	0.232539	0.0159987
0.40253	0.210086	0.0162198
0.40303	0.234196	0.0162653
0.40354	0.248812	0.0160844
0.40405	0.217231	0.016269
0.40455	0.214046	0.0163283
0.40506	0.226095	0.0163419
0.40556	0.217813	0.0163363
0.40607	0.241121	0.0164475
0.40658	0.219564	0.0166239
0.40708	0.218809	0.0164302
0.40759	0.219455	0.0164679
0.4081	0.227942	0.0168094
0.4086	0.213738	0.016615
0.40911	0.226798	0.0165823
0.40962	0.219927	0.0167383
0.41012	0.260474	0.0170336
0.41063	0.225782	0.0166666
0.41113	0.208734	0.016718
0.41164	0.213782	0.0170858
0.41215	0.236949	0.0169921
0.41265	0.220682	0.0167031
0.41316	0.225642	0.017066
0.41367	0.209147	0.0172579
0.41417	0.204835	0.0170581
0.41468	0.206371	0.0170851
0.41518	0.225191	0.0173304
0.41569	0.236098	0.0174864
0.4162	0.207388	0.0171194
0.4167	0.202514	0.0172804
0.41721	0.220577	0.0176723
0.41772	0.207782	0.017419
0.41822	0.200401	0.0173342
0.41873	0.206203	0.0175393
0.41924	0.203438	0.0180229
0.41974	0.205869	0.0176608
0.42025	0.233482	0.0176631
0.42075	0.216639	0.018094
0.42126	0.195646	0.0180473
0.42177	0.215322	0.0177523
0.42227	0.199343	0.0181156
0.42278	0.237566	0.0184603
0.42329	0.193939	0.0184
0.42379	0.206575	0.0181795
0.4243	0.22309	0.0186122
0.42481	0.205472	0.0191659
0.42531	0.224064	0.0184692
0.42582	0.200561	0.0188166
0.42632	0.208979	0.0193445
0.42683	0.229669	0.0192849
0.42734	0.205692	0.019104
0.42784	0.23108	0.0194005
0.42835	0.208008	0.0198686
0.42886	0.204537	0.0197264
0.42936	0.234207	0.0196819
0.42987	0.216017	0.0201745
0.43037	0.221489	0.020373
0.43088	0.233303	0.0200049
0.43139	0.219665	0.0202663
0.43189	0.194797	0.020945
0.4324	0.21746	0.0207314
0.43291	0.197195	0.0206916
0.43341	0.218628	0.0209411
0.43392	0.205844	0.0215636
0.43443	0.223963	0.0210745
0.43493	0.22899	0.0214352
0.43544	0.220143	0.0220581
0.43594	0.202937	0.0219239
0.43645	0.184207	0.0218628
0.43696	0.201229	0.022133
0.43746	0.190368	0.022672
0.43797	0.230945	0.0225647
0.43848	0.191387	0.0227123
0.43898	0.232808	0.0230491
0.43949	0.174228	0.0234128
0.43999	0.20601	0.0232183

## Sheet: 500_Betaine
Q	I(Q)	Error
0.0114	12.3655	49.2141
0.01191	13.0634	39.164
0.01242	9.24263	32.4901
0.01292	13.3676	24.9028
0.01343	13.2675	17.6361
0.01394	15.3969	14.5282
0.01444	13.4979	9.53517
0.01495	12.1254	6.41394
0.01546	13.5225	4.72959
0.01596	13.0572	3.46757
0.01647	12.9596	2.57894
0.01698	12.8316	2.10592
0.01748	12.1433	1.73388
0.01799	12.8209	1.22617
0.0185	12.2004	0.93447
0.019	12.3003	0.779678
0.01951	11.7165	0.613418
0.02002	11.3023	0.538344
0.02052	11.534	0.466835
0.02103	11.4541	0.391988
0.02154	11.0921	0.344534
0.02204	11.0754	0.344258
0.02255	10.9513	0.310747
0.02306	10.6245	0.268637
0.02356	10.701	0.251411
0.02407	10.0801	0.248576
0.02458	9.69717	0.232278
0.02509	9.62661	0.212976
0.02559	9.38212	0.208138
0.0261	9.56187	0.197777
0.02661	9.34764	0.19358
0.02711	9.28412	0.196346
0.02762	8.83826	0.178551
0.02813	8.85626	0.17651
0.02863	8.5486	0.178221
0.02914	8.44029	0.182032
0.02965	8.46251	0.170236
0.03015	8.18032	0.167407
0.03066	7.86751	0.164973
0.03117	7.66193	0.163132
0.03167	7.82423	0.156784
0.03218	7.42403	0.155652
0.03269	7.32732	0.15458
0.03319	7.52084	0.147721
0.0337	7.17558	0.14995
0.03421	6.82812	0.149148
0.03471	6.85706	0.147146
0.03522	6.69009	0.141793
0.03573	6.68948	0.142881
0.03623	6.55399	0.137051
0.03674	6.46901	0.136399
0.03725	6.06665	0.1332
0.03775	6.28741	0.134549
0.03826	6.08868	0.134073
0.03877	5.90172	0.129518
0.03927	5.99533	0.125867
0.03978	5.86504	0.129699
0.04029	5.73615	0.12511
0.0408	5.50422	0.125441
0.0413	5.38541	0.12492
0.04181	5.40269	0.126295
0.04232	5.22872	0.120544
0.04282	5.05606	0.122134
0.04333	4.85032	0.11904
0.04384	4.93557	0.117576
0.04434	4.96633	0.115943
0.04485	4.58922	0.113003
0.04536	4.86778	0.114274
0.04586	4.77428	0.113619
0.04637	4.37529	0.110591
0.04688	4.37054	0.114124
0.04738	4.39561	0.109123
0.04789	4.30068	0.108204
0.0484	4.14213	0.109026
0.0489	4.23426	0.105313
0.04941	4.21371	0.108862
0.04992	4.03941	0.107051
0.05042	4.01041	0.10574
0.05093	4.21526	0.105552
0.05144	3.75177	0.101679
0.05194	3.75386	0.10148
0.05245	3.6199	0.10014
0.05296	3.83565	0.0980191
0.05346	3.75947	0.100554
0.05397	3.605	0.098607
0.05448	3.54294	0.0971422
0.05498	3.53457	0.0951982
0.05549	3.45465	0.0970291
0.056	3.31547	0.0937795
0.0565	3.18357	0.096748
0.05701	3.29828	0.0925486
0.05752	3.22483	0.0933691
0.05803	3.14768	0.092048
0.05853	2.9691	0.0921999
0.05904	3.00445	0.0941441
0.05955	2.9927	0.090685
0.06005	2.94966	0.0889727
0.06056	3.07151	0.0926045
0.06107	2.87519	0.0902131
0.06157	2.8538	0.0870281
0.06208	2.89106	0.0877502
0.06259	2.61151	0.0868284
0.06309	2.77851	0.0874279
0.0636	2.62784	0.086929
0.06411	2.68505	0.0865603
0.06461	2.57265	0.0848129
0.06512	2.557	0.0867087
0.06563	2.62292	0.0839489
0.06613	2.59573	0.0850469
0.06664	2.71643	0.0845771
0.06715	2.39101	0.0833173
0.06765	2.38175	0.0833139
0.06816	2.42795	0.0815493
0.06867	2.35893	0.0824242
0.06917	2.4621	0.0829358
0.06968	2.31768	0.0816824
0.07019	2.19366	0.0808215
0.07069	2.18219	0.0810756
0.0712	2.15531	0.079632
0.07171	2.06795	0.0802474
0.07221	2.17691	0.0780247
0.07272	2.13293	0.0796695
0.07323	2.05495	0.0781393
0.07373	2.13096	0.0784023
0.07424	2.00722	0.0770332
0.07475	2.07427	0.079165
0.07526	2.12365	0.0755064
0.07576	2.05653	0.0759148
0.07627	1.9051	0.0751505
0.07678	1.94133	0.0764995
0.07728	1.86393	0.0745212
0.07779	1.81241	0.0745913
0.0783	1.97405	0.0748198
0.0788	1.85845	0.0735229
0.07931	1.75685	0.074287
0.07982	1.96744	0.0774744
0.08032	1.72766	0.0755002
0.08083	1.71656	0.0753359
0.08134	1.80734	0.0762981
0.08184	1.84254	0.0766243
0.08235	1.60184	0.0752814
0.08286	1.67545	0.0758396
0.08336	1.81532	0.0756808
0.08387	1.67933	0.0760179
0.08438	1.63086	0.0747877
0.08488	1.59121	0.076092
0.08539	1.62284	0.0754134
0.0859	1.46353	0.0751222
0.0864	1.50567	0.0754237
0.08691	1.64221	0.0753714
0.08742	1.6526	0.0749807
0.08792	1.55231	0.0736382
0.08843	1.53753	0.0739387
0.08894	1.59547	0.0743997
0.08944	1.49512	0.0739262
0.08995	1.37271	0.0742622
0.09046	1.41057	0.0737913
0.09096	1.48368	0.0740669
0.09147	1.42633	0.0723378
0.09198	1.44317	0.0719904
0.09248	1.33462	0.0710646
0.09299	1.4447	0.0712427
0.0935	1.31948	0.0714709
0.09401	1.34993	0.0729857
0.09451	1.26152	0.0728533
0.09502	1.38447	0.0707957
0.09553	1.34742	0.0709148
0.09603	1.34297	0.0734199
0.09654	1.31705	0.0711261
0.09705	1.31113	0.0724885
0.09755	1.47079	0.0735336
0.09806	1.29888	0.0730315
0.09857	1.28171	0.0715347
0.09907	1.29231	0.0726803
0.09958	1.25537	0.0720227
0.10009	1.24381	0.0710307
0.10059	1.27383	0.0703183
0.1011	1.1262	0.0723678
0.10161	1.21951	0.0719263
0.10211	1.23577	0.0726132
0.10262	1.22289	0.0728577
0.10313	1.17247	0.0718346
0.10363	1.28299	0.0714827
0.10414	1.09925	0.0694887
0.10465	1.11007	0.0710397
0.10515	1.04181	0.0686102
0.10566	1.17233	0.0695535
0.10617	1.22739	0.0703531
0.10667	1.1545	0.0693323
0.10718	1.1443	0.0689091
0.10769	1.11453	0.0665731
0.10819	1.11576	0.0667455
0.1087	1.15833	0.0661633
0.10921	1.10009	0.0662044
0.10971	1.05357	0.0665681
0.11022	1.16452	0.0650874
0.11073	1.09543	0.0649539
0.11123	1.04271	0.0648581
0.11174	1.06947	0.0649995
0.11225	1.01488	0.0638513
0.11275	1.1453	0.0644163
0.11326	0.891203	0.0645385
0.11377	1.01225	0.0639247
0.11428	1.03495	0.0622306
0.11478	1.02081	0.0627532
0.11529	0.872692	0.0624044
0.1158	0.990097	0.0622227
0.1163	1.06737	0.0621882
0.11681	0.96229	0.0620307
0.11732	0.993232	0.0609155
0.11782	0.913985	0.0607411
0.11833	0.950655	0.0605654
0.11884	1.02987	0.0613145
0.11934	0.954218	0.0599148
0.11985	0.88884	0.0600246
0.12036	0.904443	0.0611132
0.12086	0.931288	0.0601959
0.12137	0.893467	0.0598899
0.12188	0.891892	0.0590942
0.12238	0.949755	0.0590023
0.12289	0.965785	0.0591031
0.1234	0.869417	0.0585702
0.1239	0.916275	0.0587248
0.12441	0.828662	0.0581187
0.12492	0.910203	0.0591978
0.12542	0.913057	0.0582969
0.12593	0.898543	0.0581376
0.12644	0.896367	0.0567614
0.12694	0.915535	0.0558329
0.12745	0.772012	0.0580625
0.12796	0.898112	0.0570601
0.12846	0.90487	0.0567111
0.12897	0.762245	0.0574692
0.12948	0.940263	0.055821
0.12998	0.814445	0.0557782
0.13049	0.781955	0.056149
0.131	0.83657	0.0555589
0.1315	0.816685	0.0552135
0.13201	0.815497	0.055198
0.13252	0.826925	0.0551947
0.13302	0.759983	0.05449
0.13353	0.79165	0.0545558
0.13404	0.75512	0.0535351
0.13454	0.761648	0.0546263
0.13505	0.695858	0.0544477
0.13556	0.761108	0.0537579
0.13606	0.769335	0.0538959
0.13657	0.774205	0.054067
0.13708	0.73412	0.0539769
0.13758	0.869287	0.052993
0.13809	0.715155	0.0537583
0.1386	0.709658	0.0532818
0.13911	0.69537	0.0525563
0.13961	0.774535	0.0535663
0.14012	0.76215	0.053417
0.14063	0.71762	0.0525107
0.14113	0.696392	0.0522358
0.14164	0.692037	0.052128
0.14215	0.725272	0.052542
0.14265	0.731337	0.0521879
0.14316	0.696673	0.0522216
0.14367	0.633378	0.0520718
0.14417	0.758275	0.0514646
0.14468	0.66309	0.051174
0.14519	0.662528	0.0519449
0.14569	0.692392	0.0508827
0.1462	0.583405	0.0506602
0.14671	0.743167	0.0507768
0.14721	0.71976	0.0511786
0.14772	0.69024	0.050669
0.14823	0.680708	0.0508702
0.14873	0.609912	0.0511795
0.14924	0.6351	0.0505705
0.14975	0.632628	0.0511739
0.15025	0.649552	0.0501868
0.15076	0.636583	0.0502232
0.15127	0.64098	0.0506827
0.15177	0.633678	0.0501076
0.15228	0.605028	0.0505485
0.15279	0.62515	0.0497688
0.15329	0.668972	0.0491916
0.1538	0.68383	0.0493861
0.15431	0.703143	0.0499207
0.15481	0.614818	0.0494408
0.15532	0.61144	0.0493898
0.15583	0.62749	0.0490882
0.15633	0.648197	0.0487067
0.15684	0.592923	0.049385
0.15735	0.67599	0.049029
0.15785	0.559185	0.0489972
0.15836	0.621225	0.0482815
0.15887	0.634387	0.0479485
0.15937	0.548535	0.0483899
0.15988	0.54623	0.0482473
0.16039	0.578553	0.0478674
0.16089	0.616162	0.0487557
0.1614	0.647397	0.0478751
0.16191	0.48153	0.0476836
0.16241	0.60762	0.0471159
0.16292	0.534027	0.0479527
0.16343	0.56072	0.047556
0.16393	0.515023	0.0471849
0.16444	0.593328	0.0477691
0.16495	0.50266	0.0470054
0.16545	0.56331	0.0469908
0.16596	0.58522	0.046668
0.16647	0.579283	0.0471017
0.16697	0.605415	0.0466354
0.16748	0.54771	0.0476576
0.16799	0.633145	0.0474675
0.16849	0.528075	0.0477572
0.169	0.529103	0.0478888
0.16951	0.553203	0.0477223
0.17001	0.538497	0.0478875
0.17052	0.52711	0.0479861
0.17103	0.567943	0.0471459
0.17153	0.596665	0.0480616
0.17204	0.521742	0.0477347
0.17255	0.532253	0.0485013
0.17305	0.587377	0.0480262
0.17356	0.512227	0.0481188
0.17407	0.47946	0.0478413
0.17457	0.494773	0.0480091
0.17508	0.463213	0.0473389
0.17559	0.445965	0.0477407
0.1761	0.531077	0.047742
0.1766	0.431598	0.048343
0.17711	0.521935	0.0480348
0.17762	0.478573	0.0475038
0.17812	0.534112	0.0476351
0.17863	0.466222	0.0484511
0.17914	0.488503	0.0480538
0.17964	0.492235	0.0476016
0.18015	0.502287	0.0480623
0.18066	0.539728	0.0485711
0.18116	0.546625	0.0472453
0.18167	0.609707	0.0481314
0.18218	0.518698	0.049095
0.18268	0.444515	0.0490641
0.18319	0.438107	0.0480471
0.1837	0.505015	0.0486994
0.1842	0.508255	0.0489382
0.18471	0.528443	0.049108
0.18522	0.45532	0.0498556
0.18572	0.419117	0.0497551
0.18623	0.488802	0.0499431
0.18674	0.497445	0.0495139
0.18724	0.558732	0.0500005
0.18775	0.388282	0.0504245
0.18826	0.515652	0.0505502
0.18876	0.47462	0.0502953
0.18927	0.45284	0.0506326
0.18978	0.35849	0.0502343
0.19028	0.418	0.050944
0.19079	0.45265	0.0507614
0.1913	0.439458	0.0511241
0.1918	0.398895	0.0505315
0.19231	0.509842	0.0508522
0.19282	0.460285	0.0507637
0.19332	0.52523	0.0510065
0.19383	0.446265	0.0512657
0.19434	0.466875	0.0512733
0.19484	0.522057	0.0524058
0.19535	0.489085	0.0507877
0.19586	0.438393	0.050739
0.19636	0.344853	0.0517687
0.19687	0.39373	0.0514654
0.19738	0.375507	0.0517968
0.19788	0.451302	0.0517007
0.19839	0.393745	0.0517623
0.1989	0.449103	0.0512591
0.1994	0.4615	0.0514521
0.19991	0.48449	0.0518192
0.20042	0.467935	0.0514845
0.20092	0.50298	0.0510562
0.20143	0.438013	0.0520954
0.20194	0.511957	0.0522044
0.20244	0.417442	0.0518402
0.20295	0.345765	0.0519149
0.20346	0.423233	0.0518092
0.20396	0.37293	0.0514707
0.20447	0.47511	0.0513269
0.20498	0.387265	0.0510161
0.20548	0.45984	0.0522413
0.20599	0.374922	0.0513806
0.2065	0.404398	0.0517603
0.207	0.437748	0.0519808
0.20751	0.488685	0.0519396
0.20802	0.440192	0.0511046
0.20852	0.39966	0.0522066
0.20903	0.415685	0.0521723
0.20954	0.456647	0.0513932
0.21004	0.473712	0.0511641
0.21055	0.4507	0.0517097
0.21106	0.37945	0.0522354
0.21156	0.433248	0.0514072
0.21207	0.31642	0.0511552
0.21258	0.40356	0.052048
0.21308	0.371335	0.0510111
0.21359	0.41084	0.0516728
0.2141	0.403363	0.0522369
0.2146	0.337	0.0514129
0.21511	0.339232	0.0512337
0.21562	0.41708	0.0513638
0.21612	0.411228	0.0512018
0.21663	0.37633	0.0508866
0.21714	0.380805	0.050549
0.21764	0.374005	0.0511862
0.21815	0.343902	0.0509114
0.21866	0.318202	0.0513117
0.21916	0.38734	0.0509513
0.21967	0.31628	0.0514031
0.22018	0.26468	0.0502893
0.22068	0.311148	0.0505779
0.22119	0.362855	0.0507459
0.2217	0.42972	0.0508803
0.2222	0.386695	0.0505445
0.22271	0.306663	0.0505453
0.22322	0.387062	0.051233
0.22372	0.360155	0.0501743
0.22423	0.379763	0.0500521
0.22474	0.286517	0.0503593
0.22524	0.310652	0.0494088
0.22575	0.399585	0.0493682
0.22626	0.42274	0.0494544
0.22676	0.328682	0.0502903
0.22727	0.417965	0.0493844
0.22778	0.342763	0.0490585
0.22828	0.355152	0.0491363
0.22879	0.35087	0.0485601
0.2293	0.35667	0.0484773
0.2298	0.362085	0.048949
0.23031	0.40517	0.0491
0.23082	0.363915	0.0474441
0.23132	0.350975	0.047885
0.23183	0.328275	0.0486867
0.23234	0.323883	0.0478875
0.23284	0.345813	0.0479196
0.23335	0.34985	0.0477365
0.23386	0.365088	0.0477247
0.23436	0.406017	0.047026
0.23487	0.33615	0.0469513
0.23538	0.338135	0.0468533
0.23588	0.325402	0.046466
0.23639	0.34424	0.0469676
0.2369	0.342385	0.0469284
0.2374	0.271015	0.046663
0.23791	0.336487	0.046949
0.23842	0.295755	0.0461433
0.23892	0.32413	0.0464152
0.23943	0.270002	0.0462909
0.23994	0.342902	0.0463021
0.24044	0.301528	0.0456587
0.24095	0.391522	0.0462575
0.24145	0.310085	0.0457532
0.24196	0.28478	0.0453181
0.24247	0.26828	0.0453627
0.24297	0.274877	0.0453333
0.24348	0.350762	0.0458384
0.24399	0.331717	0.0453794
0.24449	0.285055	0.0450548
0.245	0.306333	0.0449814
0.24551	0.354992	0.044985
0.24601	0.356925	0.0457143
0.24652	0.33751	0.0451893
0.24703	0.316678	0.0445681
0.24753	0.291395	0.044773
0.24804	0.320145	0.0450548
0.24855	0.29633	0.0442858
0.24905	0.35332	0.0452182
0.24956	0.291737	0.0443208
0.25007	0.334668	0.0442137
0.25057	0.351612	0.044207
0.25108	0.248603	0.0442329
0.25159	0.27853	0.0437529
0.25209	0.267185	0.0434924
0.2526	0.31514	0.043743
0.25311	0.310695	0.0442845
0.25361	0.362915	0.0438579
0.25412	0.273523	0.0440115
0.25463	0.210322	0.0437767
0.25513	0.262867	0.0434379
0.25564	0.292563	0.0432753
0.25615	0.311245	0.0433373
0.25665	0.30066	0.0426268
0.25716	0.270917	0.0433906
0.25767	0.306192	0.0425541
0.25817	0.295897	0.042939
0.25868	0.294985	0.042959
0.25919	0.3097	0.0430722
0.25969	0.322483	0.0428625
0.2602	0.252242	0.0418317
0.26071	0.288772	0.042254
0.26121	0.3046	0.0421214
0.26172	0.28028	0.0418642
0.26223	0.332282	0.0417051
0.26273	0.346623	0.0421014
0.26324	0.32153	0.042419
0.26375	0.224548	0.0415643
0.26425	0.350818	0.0419577
0.26476	0.265887	0.0416
0.26527	0.29509	0.0413241
0.26577	0.280335	0.0417885
0.26628	0.278272	0.0413638
0.26679	0.330875	0.0416005
0.26729	0.1992	0.0413843
0.2678	0.276413	0.0420537
0.26831	0.203935	0.0408451
0.26881	0.27108	0.0410282
0.26932	0.248427	0.0418263
0.26983	0.22933	0.0412701
0.27033	0.21498	0.0411363
0.27084	0.26865	0.0409194
0.27134	0.268682	0.0408328
0.27185	0.255113	0.0407664
0.27236	0.306298	0.040806
0.27286	0.2165	0.0408813
0.27337	0.242487	0.040891
0.27388	0.337222	0.0402101
0.27438	0.277568	0.04054
0.27489	0.313955	0.0407287
0.2754	0.210622	0.0403952
0.2759	0.262842	0.0401001
0.27641	0.260267	0.040439
0.27692	0.271245	0.0401077
0.27742	0.215668	0.0399273
0.27793	0.233827	0.0399612
0.27844	0.189185	0.0398573
0.27894	0.301395	0.0401724
0.27945	0.317283	0.0400917
0.27996	0.2269	0.040681
0.28046	0.261852	0.0396499
0.28097	0.219628	0.0395606
0.28148	0.241558	0.0397849
0.28198	0.271668	0.0398448
0.28249	0.235125	0.0393935
0.283	0.251075	0.0399357
0.2835	0.227763	0.0398627
0.28401	0.26977	0.0397279
0.28452	0.19687	0.0395888
0.28502	0.306943	0.0396993
0.28553	0.2769	0.0395452
0.28604	0.230488	0.0390373
0.28654	0.296797	0.0391247
0.28705	0.300635	0.0397879
0.28756	0.254018	0.0396731
0.28806	0.226903	0.0395879
0.28857	0.225425	0.0396306
0.28908	0.25392	0.0400659
0.28958	0.211168	0.0393081
0.29009	0.277193	0.0396599
0.29059	0.258345	0.0400562
0.2911	0.244537	0.0397072
0.29161	0.249525	0.0394617
0.29211	0.271545	0.0395274
0.29262	0.231212	0.0398211
0.29313	0.273375	0.0394252
0.29363	0.249295	0.039166
0.29414	0.251595	0.0400239
0.29465	0.19811	0.0392809
0.29515	0.255252	0.0393962
0.29566	0.243735	0.0393337
0.29617	0.223862	0.0395173
0.29667	0.224782	0.0393685
0.29718	0.24356	0.0394975
0.29769	0.23149	0.0393294
0.29819	0.228275	0.0392136
0.2987	0.203763	0.0389904
0.29921	0.174778	0.0395935
0.29971	0.249112	0.0398003
0.30022	0.25589	0.0392565
0.30073	0.256335	0.0390895
0.30123	0.206418	0.0391086
0.30174	0.23869	0.0391871
0.30225	0.209897	0.039261
0.30275	0.23848	0.0391949
0.30326	0.19232	0.0393054
0.30377	0.266825	0.0388732
0.30427	0.237882	0.0388412
0.30478	0.248278	0.039161
0.30529	0.126463	0.0388315
0.30579	0.25253	0.0389794
0.3063	0.289685	0.0386928
0.3068	0.185372	0.0387299
0.30731	0.21973	0.0390586
0.30782	0.221832	0.0391984
0.30832	0.283322	0.039331
0.30883	0.212855	0.0393634
0.30934	0.1516	0.0391098
0.30984	0.206005	0.0389247
0.31035	0.225155	0.0391504
0.31086	0.224378	0.0393847
0.31136	0.205258	0.0394768
0.31187	0.210075	0.0401657
0.31238	0.225598	0.040371
0.31288	0.1795	0.0404599
0.31339	0.223465	0.0406656
0.3139	0.173992	0.0407001
0.3144	0.258135	0.0412085
0.31491	0.203522	0.0411615
0.31542	0.194288	0.0411767
0.31592	0.162983	0.0411828
0.31643	0.250787	0.0415426
0.31694	0.21773	0.0413169
0.31744	0.242578	0.0420168
0.31795	0.216158	0.0419449
0.31845	0.19362	0.0414329
0.31896	0.200445	0.0416495
0.31947	0.230022	0.0422463
0.31997	0.203882	0.0414963
0.32048	0.236063	0.0418475
0.32099	0.2059	0.0432725
0.32149	0.236588	0.041917
0.322	0.259402	0.0417114
0.32251	0.276325	0.041703
0.32301	0.19329	0.042226
0.32352	0.209702	0.0420839
0.32403	0.269345	0.0423949
0.32453	0.227967	0.0420031
0.32504	0.171668	0.0416928
0.32555	0.196577	0.0419257
0.32605	0.143278	0.0420088
0.32656	0.17051	0.0421355
0.32707	0.197985	0.0422731
0.32757	0.161075	0.0419927
0.32808	0.233845	0.0423029
0.32859	0.201903	0.0426792
0.32909	0.208858	0.0419952
0.3296	0.17602	0.0414101
0.3301	0.16482	0.0425648
0.33061	0.209022	0.0418241
0.33112	0.18617	0.0425143
0.33162	0.204455	0.042509
0.33213	0.157793	0.042278
0.33264	0.11516	0.0420716
0.33314	0.191565	0.0426719
0.33365	0.17511	0.0430514
0.33416	0.22374	0.0426927
0.33466	0.161708	0.0427959
0.33517	0.136827	0.042439
0.33568	0.154278	0.0433553
0.33618	0.21956	0.0433145
0.33669	0.249977	0.0430016
0.3372	0.146177	0.0428924
0.3377	0.187303	0.0431279
0.33821	0.189837	0.0424614
0.33872	0.230297	0.0431278
0.33922	0.20538	0.0433078
0.33973	0.203533	0.0433598
0.34023	0.196722	0.042894
0.34074	0.16133	0.0427978
0.34125	0.185358	0.0428404
0.34175	0.198818	0.0428903
0.34226	0.172555	0.042985
0.34277	0.182998	0.0431534
0.34327	0.13235	0.042792
0.34378	0.170953	0.0427616
0.34429	0.15988	0.0432103
0.34479	0.177767	0.0433203
0.3453	0.220435	0.0436176
0.34581	0.188562	0.0431615
0.34631	0.17343	0.0439231
0.34682	0.128995	0.0430922
0.34733	0.158553	0.043129
0.34783	0.214007	0.0440134
0.34834	0.167365	0.0440269
0.34884	0.196382	0.0435532
0.34935	0.18724	0.0436716
0.34986	0.176998	0.0437137
0.35036	0.165247	0.0434369
0.35087	0.163155	0.0432124
0.35138	0.161257	0.0437794
0.35188	0.23442	0.0438759
0.35239	0.226398	0.0435611
0.3529	0.13634	0.0430936
0.3534	0.16596	0.0435116
0.35391	0.221195	0.0436271
0.35442	0.166495	0.0430849
0.35492	0.180388	0.0431167
0.35543	0.17201	0.0420261
0.35594	0.16861	0.0420036
0.35644	0.106353	0.0413439
0.35695	0.160968	0.0411161
0.35745	0.125548	0.0409871
0.35796	0.16434	0.0404967
0.35847	0.150457	0.0409113
0.35897	0.139293	0.0418007
0.35948	0.190968	0.0414933
0.35999	0.119965	0.0410762
0.36049	0.194785	0.0418788
0.361	0.161717	0.0413219
0.36151	0.257355	0.04193
0.36201	0.207838	0.0422748
0.36252	0.152975	0.0422815
0.36303	0.198178	0.0421219
0.36353	0.200893	0.0417304
0.36404	0.168483	0.0421589
0.36455	0.179537	0.042374
0.36505	0.169648	0.0427612
0.36556	0.13583	0.0426345
0.36606	0.200055	0.042979
0.36657	0.132093	0.042732
0.36708	0.203455	0.0428694
0.36758	0.129105	0.0432241
0.36809	0.223743	0.043094
0.3686	0.1892	0.0432955
0.3691	0.1569	0.0436453
0.36961	0.200875	0.0439954
0.37012	0.144695	0.0441592
0.37062	0.141235	0.0445913
0.37113	0.224485	0.044958
0.37164	0.225425	0.045226
0.37214	0.133843	0.0449643
0.37265	0.229355	0.0451418
0.37315	0.197903	0.0459262
0.37366	0.127117	0.0451624
0.37417	0.146668	0.0447645
0.37467	0.13666	0.0451544
0.37518	0.125133	0.0455997
0.37569	0.12582	0.0461422
0.37619	0.162892	0.0450435
0.3767	0.15527	0.0464361
0.37721	0.21807	0.0455911
0.37771	0.24145	0.0465072
0.37822	0.26383	0.0474314
0.37873	0.123315	0.0469859
0.37923	0.165227	0.047344
0.37974	0.143155	0.0467296
0.38024	0.170492	0.047912
0.38075	0.170405	0.0478613
0.38126	0.135265	0.0474448
0.38176	0.129238	0.0474288
0.38227	0.225265	0.0483819
0.38278	0.144223	0.0482686
0.38328	0.21073	0.0482388
0.38379	0.159913	0.0488311
0.3843	0.0806	0.0491907
0.3848	0.161782	0.0492964
0.38531	0.159697	0.0495467
0.38582	0.18421	0.0499039
0.38632	0.182265	0.0495887
0.38683	0.142597	0.0492614
0.38733	0.149143	0.0500955
0.38784	0.202242	0.0508158
0.38835	0.124905	0.0504301
0.38885	0.252345	0.0505758
0.38936	0.11826	0.0514854
0.38987	0.101413	0.0511342
0.39037	0.186885	0.0515448
0.39088	0.197063	0.0526655
0.39139	0.213605	0.0516284
0.39189	0.101445	0.0525047
0.3924	0.119652	0.0527184
0.3929	0.158073	0.0526549
0.39341	0.15694	0.0527577
0.39392	0.103745	0.0529968
0.39442	0.201153	0.0537962
0.39493	0.111988	0.0531033
0.39544	0.07105	0.0538172
0.39594	0.266267	0.0539224
0.39645	0.136733	0.0554163
0.39696	0.157573	0.0549276
0.39746	0.238973	0.0554803
0.39797	0.0951875	0.0539444
0.39847	0.08267	0.0556859
0.39898	0.136563	0.0549909
0.39949	0.164077	0.056252
0.39999	0.141565	0.0562626
0.4005	0.123945	0.0564294
0.40101	0.163738	0.0564311
0.40151	0.221935	0.0550721
0.40202	0.14837	0.0561896
0.40253	0.224903	0.0571486
0.40303	0.247845	0.0577076
0.40354	0.171695	0.0573277
0.40405	0.162818	0.0572993
0.40455	0.142235	0.0582149
0.40506	0.12762	0.0583935
0.40556	0.2068	0.0574951
0.40607	0.12017	0.0574477
0.40658	0.131435	0.0589574
0.40708	0.0886675	0.0580085
0.40759	0.143783	0.0586561
0.4081	0.222085	0.058938
0.4086	0.176093	0.0589579
0.40911	0.138988	0.0583174
0.40962	0.258163	0.0596578
0.41012	0.164132	0.0599979
0.41063	0.20654	0.0595971
0.41113	0.02916	0.0592917
0.41164	0.154798	0.0612019
0.41215	0.182965	0.0599166
0.41265	0.14236	0.0593705
0.41316	0.22774	0.0595538
0.41367	0.108927	0.0614504
0.41417	0.06437	0.0604769
0.41468	0.112208	0.0606432
0.41518	0.121798	0.0614687
0.41569	0.117112	0.0630814
0.4162	0.08268	0.0597687
0.4167	0.206407	0.0612945
0.41721	0.052425	0.0625459
0.41772	0.0591575	0.0615632
0.41822	0.136747	0.0611419
0.41873	0.102932	0.0631049
0.41924	0.220075	0.0639619
0.41974	0.112763	0.062802
0.42025	0.117032	0.0635897
0.42075	0.0804625	0.0651275
0.42126	0.204942	0.0646609
0.42177	0.08373	0.0623672
0.42227	0.121637	0.065059
0.42278	0.120335	0.0663774
0.42329	0.054415	0.0641508
0.42379	0.108677	0.0645235
0.4243	0.02878	0.0650883
0.42481	0.136123	0.0687399
0.42531	0.22804	0.0643222
0.42582	0.160078	0.0676874
0.42632	0.15187	0.0685681
0.42683	0.156695	0.0702899
0.42734	-0.00496	0.0670501
0.42784	0.15022	0.0698768
0.42835	0.158782	0.0712152
0.42886	0.166758	0.0690427
0.42936	0.14153	0.0685847
0.42987	0.246457	0.0725917
0.43037	0.163975	0.0739385
0.43088	0.0514175	0.0705719
0.43139	0.154075	0.0725479
0.43189	0.11414	0.0747076
0.4324	0.098135	0.0732581
0.43291	0.167238	0.0743753
0.43341	0.16315	0.0748879
0.43392	0.12349	0.0779447
0.43443	0.114275	0.0743066
0.43493	0.190595	0.0768709
0.43544	0.216073	0.0779733
0.43594	0.100153	0.0786424
0.43645	0.15791	0.0785987
0.43696	0.285915	0.0789536
0.43746	0.092235	0.0787057
0.43797	0.236953	0.0807953
0.43848	0.04415	0.0813143
0.43898	0.117752	0.0808103
0.43949	0.013415	0.0850772
0.43999	0.232233	0.0840932

## Sheet: CAHS_betaine_Tris_4
Q	I(Q)	Error
0.0114	16.0465	49.4946
0.01191	6.67204	39.1669
0.01242	12.0119	32.5654
0.01292	10.6759	25.0967
0.01343	13.8872	17.1174
0.01394	13.8628	14.5373
0.01444	15.5135	9.54578
0.01495	14.2599	6.40758
0.01546	15.1477	4.68303
0.01596	14.7937	3.39287
0.01647	14.0917	2.55779
0.01698	13.9662	2.08596
0.01748	14.0942	1.72775
0.01799	12.9971	1.19235
0.0185	14.2476	0.949743
0.019	13.2878	0.799694
0.01951	13.3365	0.600544
0.02002	13.0022	0.551202
0.02052	12.2858	0.462315
0.02103	12.5149	0.380798
0.02154	12.1902	0.36003
0.02204	12.1443	0.337294
0.02255	11.8076	0.30629
0.02306	11.3943	0.27509
0.02356	11.2537	0.260172
0.02407	11.074	0.237724
0.02458	10.7399	0.227785
0.02509	10.5209	0.215403
0.02559	10.4748	0.206952
0.0261	10.3395	0.204496
0.02661	10.0628	0.189566
0.02711	9.99874	0.191466
0.02762	9.43869	0.188531
0.02813	9.23883	0.177774
0.02863	9.31829	0.175627
0.02914	8.92728	0.16755
0.02965	8.71303	0.167094
0.03015	8.93163	0.168409
0.03066	8.79758	0.169737
0.03117	8.55456	0.16284
0.03167	8.18374	0.156325
0.03218	8.02487	0.15212
0.03269	8.15449	0.157043
0.03319	7.94614	0.145422
0.0337	7.57929	0.151236
0.03421	7.46033	0.149891
0.03471	7.29943	0.144416
0.03522	7.22077	0.144158
0.03573	7.13363	0.138684
0.03623	6.70329	0.140909
0.03674	6.70276	0.137099
0.03725	6.84105	0.135165
0.03775	6.72396	0.131804
0.03826	6.55559	0.130971
0.03877	6.33504	0.128239
0.03927	6.18957	0.129912
0.03978	6.17798	0.130544
0.04029	6.09631	0.125571
0.0408	5.99731	0.123036
0.0413	5.88494	0.126737
0.04181	5.81916	0.123273
0.04232	5.94513	0.12215
0.04282	5.48189	0.119216
0.04333	5.48428	0.116468
0.04384	5.24605	0.117729
0.04434	5.24883	0.118642
0.04485	5.2888	0.116094
0.04536	5.0617	0.114033
0.04586	4.98645	0.113986
0.04637	4.99768	0.114294
0.04688	4.84064	0.111616
0.04738	4.80729	0.110377
0.04789	4.80061	0.10833
0.0484	4.61001	0.109248
0.0489	4.28803	0.106328
0.04941	4.42589	0.10547
0.04992	4.25549	0.104462
0.05042	4.30248	0.104791
0.05093	4.18505	0.104594
0.05144	4.28727	0.102747
0.05194	3.87154	0.100584
0.05245	4.0394	0.0985576
0.05296	3.93091	0.0991219
0.05346	4.01787	0.097321
0.05397	3.83231	0.0975113
0.05448	3.89007	0.0970348
0.05498	3.71422	0.0952296
0.05549	3.64228	0.0973776
0.056	3.67789	0.0953663
0.0565	3.59653	0.0947866
0.05701	3.55727	0.0956314
0.05752	3.489	0.0918624
0.05803	3.27174	0.0907015
0.05853	3.33998	0.0906837
0.05904	3.37284	0.0932792
0.05955	3.22155	0.0894557
0.06005	3.42429	0.0900753
0.06056	3.13506	0.0902858
0.06107	3.08602	0.0900049
0.06157	3.0659	0.0883054
0.06208	2.92723	0.0876727
0.06259	2.77647	0.0879326
0.06309	2.92836	0.0874276
0.0636	2.94985	0.086349
0.06411	2.92379	0.0862297
0.06461	2.90882	0.085363
0.06512	2.70659	0.0852255
0.06563	2.75698	0.0845478
0.06613	2.57591	0.0839437
0.06664	2.65964	0.0838997
0.06715	2.58022	0.0836324
0.06765	2.58856	0.0822325
0.06816	2.46843	0.083304
0.06867	2.54885	0.0822334
0.06917	2.34294	0.081449
0.06968	2.34324	0.0813701
0.07019	2.47893	0.0786408
0.07069	2.54394	0.0799521
0.0712	2.47988	0.0798952
0.07171	2.24934	0.0792533
0.07221	2.3892	0.080079
0.07272	2.40083	0.0778049
0.07323	2.33476	0.0783634
0.07373	2.25547	0.0772971
0.07424	2.30001	0.0750445
0.07475	2.15618	0.0783693
0.07526	2.13958	0.0762601
0.07576	2.23694	0.0759686
0.07627	2.07998	0.0749588
0.07678	2.21783	0.0758268
0.07728	1.99089	0.07434
0.07779	2.00768	0.0744284
0.0783	2.06982	0.0747226
0.0788	2.09422	0.0750826
0.07931	2.04269	0.074273
0.07982	1.96679	0.0765559
0.08032	2.0618	0.074639
0.08083	1.88834	0.0753939
0.08134	1.87943	0.0766484
0.08184	1.96238	0.0759322
0.08235	1.94053	0.0761422
0.08286	1.92581	0.0752357
0.08336	1.90032	0.0771117
0.08387	1.79043	0.0750436
0.08438	1.90693	0.0740642
0.08488	1.69599	0.0760785
0.08539	1.76295	0.0766213
0.0859	1.78638	0.0746686
0.0864	1.70097	0.0756614
0.08691	1.83524	0.0759529
0.08742	1.69449	0.0757921
0.08792	1.75581	0.07384
0.08843	1.7064	0.0749552
0.08894	1.71051	0.0740955
0.08944	1.73057	0.0734056
0.08995	1.6727	0.0747476
0.09046	1.6598	0.0747564
0.09096	1.58036	0.0730323
0.09147	1.58347	0.0721047
0.09198	1.57686	0.0715422
0.09248	1.46301	0.0732841
0.09299	1.62518	0.0722133
0.0935	1.56332	0.0733252
0.09401	1.56543	0.0728947
0.09451	1.51286	0.0728398
0.09502	1.54022	0.0733371
0.09553	1.48391	0.0719985
0.09603	1.62292	0.0738921
0.09654	1.4194	0.0711224
0.09705	1.38309	0.0719253
0.09755	1.3736	0.0726698
0.09806	1.40084	0.0718962
0.09857	1.39281	0.072463
0.09907	1.41165	0.0718903
0.09958	1.38975	0.0720292
0.10009	1.35565	0.0715907
0.10059	1.46194	0.0714328
0.1011	1.3965	0.071723
0.10161	1.29168	0.07144
0.10211	1.29186	0.0723752
0.10262	1.30464	0.0717503
0.10313	1.1495	0.0730483
0.10363	1.25293	0.0709032
0.10414	1.29253	0.0701357
0.10465	1.35438	0.0702781
0.10515	1.36149	0.0687112
0.10566	1.1898	0.0693981
0.10617	1.27755	0.0701927
0.10667	1.19788	0.0674424
0.10718	1.31494	0.0681275
0.10769	1.30269	0.0680079
0.10819	1.15335	0.0678873
0.1087	1.18126	0.065668
0.10921	1.20283	0.0665189
0.10971	1.09007	0.0669602
0.11022	1.19368	0.0647798
0.11073	1.23876	0.0645198
0.11123	1.19999	0.0650346
0.11174	1.16572	0.0651097
0.11225	1.08004	0.0639497
0.11275	1.19755	0.0634684
0.11326	1.22976	0.0634041
0.11377	1.21016	0.0627246
0.11428	1.10507	0.0624319
0.11478	1.0706	0.0629691
0.11529	0.97135	0.0620009
0.1158	1.16664	0.0618498
0.1163	1.21653	0.0621511
0.11681	0.98081	0.0618834
0.11732	1.08984	0.0609792
0.11782	1.06012	0.0621157
0.11833	1.07994	0.0599038
0.11884	1.0004	0.0613435
0.11934	1.06328	0.0604875
0.11985	1.09227	0.0593727
0.12036	1.02712	0.0607258
0.12086	1.02547	0.0597588
0.12137	0.998525	0.0599766
0.12188	0.990187	0.0605389
0.12238	0.945985	0.059076
0.12289	1.07136	0.0583829
0.1234	0.998405	0.0589339
0.1239	1.12696	0.0590906
0.12441	0.972295	0.0584351
0.12492	0.988873	0.0579175
0.12542	0.89226	0.0580288
0.12593	0.960762	0.0580907
0.12644	0.836738	0.0567042
0.12694	0.913183	0.0566075
0.12745	0.93813	0.0568414
0.12796	0.957908	0.0569575
0.12846	1.00314	0.0572625
0.12897	0.979407	0.0566274
0.12948	0.953105	0.0555389
0.12998	0.959422	0.05535
0.13049	0.90372	0.0557076
0.131	0.854047	0.0555694
0.1315	0.913438	0.0554334
0.13201	0.931418	0.0547534
0.13252	0.82718	0.0547703
0.13302	0.874642	0.0546976
0.13353	0.850255	0.0546413
0.13404	0.871235	0.0534877
0.13454	0.872845	0.054292
0.13505	0.856875	0.0544003
0.13556	0.880618	0.0539019
0.13606	0.838448	0.0538373
0.13657	0.827122	0.0538355
0.13708	0.895142	0.0533436
0.13758	0.874977	0.0532549
0.13809	0.815385	0.0535027
0.1386	0.808813	0.053094
0.13911	0.82077	0.0528789
0.13961	0.89564	0.0539769
0.14012	0.838285	0.0532479
0.14063	0.834022	0.0521633
0.14113	0.793443	0.0519704
0.14164	0.831793	0.0518858
0.14215	0.766888	0.0522435
0.14265	0.733718	0.0526404
0.14316	0.778425	0.0516603
0.14367	0.839017	0.0514078
0.14417	0.856823	0.0516867
0.14468	0.861853	0.050873
0.14519	0.738375	0.052048
0.14569	0.727158	0.0515871
0.1462	0.783865	0.0511006
0.14671	0.74963	0.051082
0.14721	0.735618	0.0510604
0.14772	0.761255	0.0504767
0.14823	0.804955	0.0502431
0.14873	0.720163	0.0498563
0.14924	0.819847	0.0507991
0.14975	0.730715	0.0507105
0.15025	0.768765	0.0507055
0.15076	0.767648	0.050641
0.15127	0.680867	0.0500789
0.15177	0.719233	0.0496752
0.15228	0.66902	0.0499054
0.15279	0.837858	0.0501753
0.15329	0.755545	0.0489274
0.1538	0.678305	0.0494451
0.15431	0.617818	0.0490589
0.15481	0.654567	0.0484599
0.15532	0.70047	0.0490056
0.15583	0.705365	0.0489462
0.15633	0.592755	0.048247
0.15684	0.689133	0.0480029
0.15735	0.680205	0.0487599
0.15785	0.71043	0.0490174
0.15836	0.657905	0.0477548
0.15887	0.62638	0.0478725
0.15937	0.669443	0.0479917
0.15988	0.699005	0.0474888
0.16039	0.63632	0.0474437
0.16089	0.593017	0.0478015
0.1614	0.685678	0.0471701
0.16191	0.701503	0.047355
0.16241	0.649552	0.047471
0.16292	0.653678	0.047159
0.16343	0.609563	0.0467759
0.16393	0.638983	0.0471497
0.16444	0.67404	0.0472776
0.16495	0.649957	0.0468663
0.16545	0.636768	0.0466868
0.16596	0.670857	0.0470003
0.16647	0.582518	0.0464996
0.16697	0.619765	0.0459767
0.16748	0.55115	0.0471185
0.16799	0.615138	0.0475872
0.16849	0.569565	0.0473549
0.169	0.673795	0.0475377
0.16951	0.679527	0.0483566
0.17001	0.587085	0.047701
0.17052	0.595325	0.047572
0.17103	0.564765	0.0480585
0.17153	0.66397	0.0473223
0.17204	0.605823	0.0477474
0.17255	0.55392	0.0478665
0.17305	0.59018	0.0480234
0.17356	0.542528	0.0483503
0.17407	0.630513	0.0475548
0.17457	0.644402	0.0479977
0.17508	0.532432	0.0476792
0.17559	0.661672	0.048135
0.1761	0.548418	0.0472372
0.1766	0.524855	0.0476241
0.17711	0.603988	0.0480622
0.17762	0.5319	0.0474761
0.17812	0.549262	0.0475737
0.17863	0.561608	0.0475184
0.17914	0.54972	0.0476486
0.17964	0.59145	0.0467805
0.18015	0.54077	0.0481126
0.18066	0.535277	0.0477418
0.18116	0.548397	0.0466596
0.18167	0.512125	0.0480086
0.18218	0.592017	0.04886
0.18268	0.571017	0.0485499
0.18319	0.596895	0.0481195
0.1837	0.536312	0.0490373
0.1842	0.528887	0.0487882
0.18471	0.49473	0.0486689
0.18522	0.478705	0.0487254
0.18572	0.463275	0.049685
0.18623	0.47455	0.049545
0.18674	0.500347	0.0492624
0.18724	0.504095	0.0500426
0.18775	0.439928	0.0501575
0.18826	0.409455	0.0495453
0.18876	0.487563	0.0500326
0.18927	0.477392	0.0503379
0.18978	0.599535	0.0503246
0.19028	0.503855	0.0504091
0.19079	0.548582	0.0506146
0.1913	0.483473	0.0507158
0.1918	0.512672	0.0500491
0.19231	0.482413	0.0504856
0.19282	0.52541	0.0511892
0.19332	0.474785	0.0512219
0.19383	0.492855	0.0504975
0.19434	0.517983	0.0506424
0.19484	0.471492	0.0511055
0.19535	0.526687	0.0506364
0.19586	0.43704	0.0513792
0.19636	0.51814	0.0515544
0.19687	0.547065	0.0513764
0.19738	0.473733	0.051309
0.19788	0.530977	0.0511186
0.19839	0.43874	0.0515991
0.1989	0.530197	0.0514992
0.1994	0.469027	0.0507832
0.19991	0.473042	0.0520567
0.20042	0.479442	0.051242
0.20092	0.425223	0.0510027
0.20143	0.445765	0.0511118
0.20194	0.476137	0.0521699
0.20244	0.40165	0.0509663
0.20295	0.45847	0.0513493
0.20346	0.46072	0.0518393
0.20396	0.44728	0.0511781
0.20447	0.46243	0.0510915
0.20498	0.444585	0.0509115
0.20548	0.435758	0.0513818
0.20599	0.446298	0.0508315
0.2065	0.475442	0.0516139
0.207	0.418015	0.0515303
0.20751	0.422135	0.0520573
0.20802	0.407765	0.0514784
0.20852	0.43369	0.0512017
0.20903	0.43014	0.0513166
0.20954	0.48734	0.0504297
0.21004	0.375638	0.0507342
0.21055	0.445605	0.0517848
0.21106	0.408957	0.0512408
0.21156	0.502567	0.0509677
0.21207	0.398205	0.0511691
0.21258	0.414247	0.0520217
0.21308	0.504945	0.0510615
0.21359	0.46872	0.0512239
0.2141	0.462925	0.0514528
0.2146	0.320485	0.0511635
0.21511	0.397825	0.050817
0.21562	0.410197	0.0504966
0.21612	0.41723	0.0521835
0.21663	0.436173	0.0502329
0.21714	0.4059	0.0504091
0.21764	0.386132	0.0512352
0.21815	0.47895	0.0508609
0.21866	0.369017	0.0503967
0.21916	0.411623	0.0507598
0.21967	0.433482	0.0511553
0.22018	0.37495	0.0497174
0.22068	0.40528	0.0506921
0.22119	0.392257	0.0504166
0.2217	0.390863	0.0508745
0.2222	0.312597	0.0499776
0.22271	0.397705	0.0498159
0.22322	0.327885	0.0503816
0.22372	0.40232	0.0490415
0.22423	0.37052	0.0494373
0.22474	0.402955	0.0499601
0.22524	0.342112	0.0490655
0.22575	0.353485	0.0492382
0.22626	0.371447	0.0493988
0.22676	0.482922	0.0493091
0.22727	0.439767	0.0489901
0.22778	0.396535	0.0484097
0.22828	0.379763	0.0487868
0.22879	0.44583	0.0491265
0.2293	0.327315	0.0476264
0.2298	0.401185	0.0488222
0.23031	0.434845	0.0481711
0.23082	0.3637	0.0479962
0.23132	0.3763	0.047825
0.23183	0.375248	0.0480988
0.23234	0.342135	0.0471917
0.23284	0.30893	0.0470191
0.23335	0.33544	0.0478337
0.23386	0.361	0.0476874
0.23436	0.417573	0.0474967
0.23487	0.37988	0.0464608
0.23538	0.397475	0.0468218
0.23588	0.289915	0.045811
0.23639	0.37112	0.0466897
0.2369	0.403832	0.0465244
0.2374	0.365815	0.0468216
0.23791	0.350828	0.0460525
0.23842	0.30256	0.0458761
0.23892	0.40125	0.0468021
0.23943	0.31018	0.0457359
0.23994	0.435117	0.0463016
0.24044	0.405008	0.0455963
0.24095	0.35682	0.0452798
0.24145	0.371708	0.0452474
0.24196	0.361065	0.0453061
0.24247	0.32303	0.0453558
0.24297	0.336587	0.0449921
0.24348	0.39899	0.045197
0.24399	0.38872	0.0450731
0.24449	0.33408	0.045337
0.245	0.329622	0.0446643
0.24551	0.37089	0.044361
0.24601	0.345295	0.0449083
0.24652	0.368858	0.0443933
0.24703	0.31225	0.0440701
0.24753	0.31165	0.0448555
0.24804	0.354075	0.0450519
0.24855	0.400857	0.0437254
0.24905	0.399423	0.0445988
0.24956	0.315735	0.0446481
0.25007	0.303415	0.043701
0.25057	0.319902	0.0439206
0.25108	0.395937	0.0436109
0.25159	0.270575	0.043818
0.25209	0.297903	0.0437067
0.2526	0.35947	0.043667
0.25311	0.28363	0.0441921
0.25361	0.347857	0.042752
0.25412	0.37485	0.0429343
0.25463	0.329735	0.0434944
0.25513	0.344687	0.0432307
0.25564	0.3136	0.0427417
0.25615	0.299625	0.0428193
0.25665	0.297183	0.0426527
0.25716	0.368167	0.0425302
0.25767	0.311595	0.0422524
0.25817	0.404222	0.0432715
0.25868	0.311377	0.0424811
0.25919	0.30527	0.0426042
0.25969	0.322235	0.0420505
0.2602	0.324375	0.0419889
0.26071	0.31359	0.0416525
0.26121	0.217092	0.0415455
0.26172	0.289885	0.041645
0.26223	0.378862	0.041779
0.26273	0.244045	0.0414687
0.26324	0.35734	0.0416136
0.26375	0.335895	0.0413451
0.26425	0.290828	0.0414809
0.26476	0.308233	0.0413241
0.26527	0.289237	0.0419763
0.26577	0.378333	0.0414592
0.26628	0.314845	0.0415838
0.26679	0.34733	0.0410362
0.26729	0.307607	0.0408499
0.2678	0.276653	0.0411264
0.26831	0.368482	0.0408613
0.26881	0.333357	0.04085
0.26932	0.26788	0.0407201
0.26983	0.232082	0.0407196
0.27033	0.323203	0.040945
0.27084	0.340353	0.0409747
0.27134	0.322223	0.0407282
0.27185	0.277232	0.0408184
0.27236	0.325487	0.0406328
0.27286	0.283303	0.0403964
0.27337	0.305277	0.0402649
0.27388	0.320043	0.0402495
0.27438	0.315148	0.0403576
0.27489	0.331462	0.0396478
0.2754	0.334715	0.0399803
0.2759	0.324555	0.0402689
0.27641	0.316785	0.0399463
0.27692	0.305663	0.0401939
0.27742	0.267755	0.039481
0.27793	0.280062	0.0401023
0.27844	0.31079	0.0396452
0.27894	0.270087	0.0396912
0.27945	0.271852	0.0396773
0.27996	0.309173	0.039938
0.28046	0.289382	0.039546
0.28097	0.27067	0.0392214
0.28148	0.28969	0.0395387
0.28198	0.26842	0.039486
0.28249	0.285665	0.0390692
0.283	0.255597	0.039184
0.2835	0.316263	0.0393538
0.28401	0.338222	0.0391685
0.28452	0.191615	0.0394063
0.28502	0.321742	0.0392314
0.28553	0.296198	0.0394662
0.28604	0.308698	0.0394323
0.28654	0.25304	0.0390984
0.28705	0.282845	0.0395363
0.28756	0.234497	0.0388346
0.28806	0.308667	0.0389636
0.28857	0.29532	0.039286
0.28908	0.281373	0.0394705
0.28958	0.309155	0.0392384
0.29009	0.270377	0.0395175
0.29059	0.193648	0.0390937
0.2911	0.242712	0.0393058
0.29161	0.235915	0.0393237
0.29211	0.288645	0.0394385
0.29262	0.27479	0.0394844
0.29313	0.331445	0.0393138
0.29363	0.211005	0.0390134
0.29414	0.218915	0.0389795
0.29465	0.31761	0.0392598
0.29515	0.266065	0.0389236
0.29566	0.29223	0.0390526
0.29617	0.22394	0.0390934
0.29667	0.208042	0.0390984
0.29718	0.254408	0.0387339
0.29769	0.27778	0.0391672
0.29819	0.233113	0.0389153
0.2987	0.270813	0.0390197
0.29921	0.30648	0.0390949
0.29971	0.291645	0.0392998
0.30022	0.280303	0.039171
0.30073	0.23326	0.0388606
0.30123	0.290517	0.0387302
0.30174	0.201063	0.039215
0.30225	0.206138	0.0389214
0.30275	0.293513	0.0383684
0.30326	0.263553	0.0388625
0.30377	0.243635	0.0380008
0.30427	0.230307	0.0384603
0.30478	0.264643	0.0386746
0.30529	0.285952	0.0386196
0.30579	0.197717	0.0382372
0.3063	0.25713	0.0380537
0.3068	0.253315	0.038023
0.30731	0.214485	0.0385088
0.30782	0.256955	0.0386135
0.30832	0.272935	0.0389893
0.30883	0.277682	0.0392087
0.30934	0.26132	0.0390061
0.30984	0.213707	0.0390219
0.31035	0.267348	0.0391423
0.31086	0.348222	0.0391426
0.31136	0.177198	0.039166
0.31187	0.215062	0.0394099
0.31238	0.284083	0.0402151
0.31288	0.296073	0.0402748
0.31339	0.282108	0.0402191
0.3139	0.239835	0.04097
0.3144	0.161513	0.0404499
0.31491	0.207492	0.0412401
0.31542	0.173847	0.0405266
0.31592	0.19979	0.0410422
0.31643	0.288448	0.0412987
0.31694	0.244935	0.0408997
0.31744	0.261008	0.0417064
0.31795	0.239283	0.0413375
0.31845	0.21901	0.0412619
0.31896	0.259925	0.0412134
0.31947	0.18591	0.0414036
0.31997	0.240982	0.0416826
0.32048	0.230618	0.0415646
0.32099	0.213322	0.0422352
0.32149	0.276128	0.0416455
0.322	0.284515	0.041408
0.32251	0.225775	0.0417455
0.32301	0.183883	0.0413249
0.32352	0.169153	0.0411587
0.32403	0.2234	0.0415126
0.32453	0.213493	0.0416394
0.32504	0.25732	0.0413988
0.32555	0.227128	0.0410869
0.32605	0.202698	0.0414953
0.32656	0.193912	0.0415813
0.32707	0.217042	0.0411863
0.32757	0.210558	0.0416913
0.32808	0.28471	0.0416625
0.32859	0.180253	0.0419833
0.32909	0.202733	0.0419446
0.3296	0.20523	0.0419267
0.3301	0.265688	0.0421764
0.33061	0.169195	0.0419028
0.33112	0.299683	0.0418251
0.33162	0.249543	0.0421096
0.33213	0.185397	0.0423046
0.33264	0.192878	0.0420518
0.33314	0.243195	0.042045
0.33365	0.227768	0.0426205
0.33416	0.267355	0.0421503
0.33466	0.195568	0.042126
0.33517	0.284535	0.0424144
0.33568	0.21586	0.0423821
0.33618	0.200322	0.042284
0.33669	0.23747	0.0423852
0.3372	0.199742	0.0424821
0.3377	0.213935	0.0424371
0.33821	0.198802	0.042728
0.33872	0.18115	0.0425391
0.33922	0.183762	0.0432067
0.33973	0.221702	0.0424631
0.34023	0.18798	0.042529
0.34074	0.206745	0.0427976
0.34125	0.166357	0.0431365
0.34175	0.19062	0.0427098
0.34226	0.23391	0.0428784
0.34277	0.1995	0.0428521
0.34327	0.196022	0.042348
0.34378	0.18992	0.0426308
0.34429	0.173643	0.0432544
0.34479	0.194013	0.0428702
0.3453	0.239083	0.0431133
0.34581	0.179875	0.0430341
0.34631	0.196373	0.0431443
0.34682	0.232712	0.0433218
0.34733	0.190145	0.042991
0.34783	0.212592	0.0427729
0.34834	0.230615	0.0432892
0.34884	0.227332	0.0429942
0.34935	0.184397	0.0426502
0.34986	0.212355	0.0435815
0.35036	0.218693	0.0430933
0.35087	0.19304	0.0423372
0.35138	0.252792	0.0432833
0.35188	0.167745	0.0427025
0.35239	0.253038	0.0426915
0.3529	0.213572	0.0428902
0.3534	0.118832	0.0429718
0.35391	0.212347	0.0431186
0.35442	0.221215	0.0424981
0.35492	0.16906	0.0421415
0.35543	0.21838	0.0411163
0.35594	0.191192	0.0416734
0.35644	0.175985	0.0406824
0.35695	0.144885	0.04089
0.35745	0.18022	0.0409377
0.35796	0.2421	0.0401669
0.35847	0.143712	0.040624
0.35897	0.180352	0.040915
0.35948	0.286703	0.0410326
0.35999	0.146278	0.0409
0.36049	0.139267	0.0410424
0.361	0.220828	0.0416413
0.36151	0.222718	0.0416184
0.36201	0.13213	0.0411149
0.36252	0.21235	0.0418992
0.36303	0.17663	0.0413003
0.36353	0.253808	0.0416602
0.36404	0.182143	0.0422581
0.36455	0.21	0.0422134
0.36505	0.250543	0.042159
0.36556	0.204235	0.0417442
0.36606	0.249435	0.0421426
0.36657	0.181757	0.0422965
0.36708	0.198733	0.0425586
0.36758	0.154312	0.0430628
0.36809	0.170063	0.0433232
0.3686	0.117078	0.0427828
0.3691	0.222578	0.0432708
0.36961	0.153952	0.0435191
0.37012	0.151165	0.0442488
0.37062	0.172737	0.0437306
0.37113	0.155488	0.0441461
0.37164	0.153255	0.0453132
0.37214	0.15722	0.0446233
0.37265	0.180493	0.0443102
0.37315	0.1756	0.0449076
0.37366	0.301787	0.0445493
0.37417	0.20428	0.0448532
0.37467	0.20378	0.0445236
0.37518	0.102475	0.0448226
0.37569	0.16596	0.0452283
0.37619	0.183805	0.0452818
0.3767	0.204847	0.0453373
0.37721	0.152705	0.0459111
0.37771	0.144825	0.0455594
0.37822	0.165063	0.0462265
0.37873	0.130158	0.0463895
0.37923	0.258217	0.0473285
0.37974	0.12056	0.0461316
0.38024	0.22012	0.0476418
0.38075	0.182902	0.0476512
0.38126	0.261015	0.0474322
0.38176	0.23226	0.0475343
0.38227	0.172515	0.0482752
0.38278	0.145317	0.0477185
0.38328	0.250148	0.0476514
0.38379	0.170742	0.0480524
0.3843	0.173638	0.0483236
0.3848	0.203767	0.0489304
0.38531	0.168572	0.0485848
0.38582	0.149352	0.0486699
0.38632	0.177535	0.0491151
0.38683	0.15332	0.0493673
0.38733	0.147865	0.0498027
0.38784	0.214575	0.0494576
0.38835	0.206627	0.04987
0.38885	0.203887	0.049729
0.38936	0.161573	0.0509057
0.38987	0.16512	0.050654
0.39037	0.197797	0.0510357
0.39088	0.201648	0.050887
0.39139	0.211998	0.051033
0.39189	0.14826	0.0519441
0.3924	0.175435	0.0515807
0.3929	0.1525	0.0516791
0.39341	0.201052	0.0518843
0.39392	0.129263	0.0534558
0.39442	0.170728	0.0522091
0.39493	0.242033	0.0530027
0.39544	0.195312	0.0536032
0.39594	0.122455	0.0528383
0.39645	0.25933	0.0567086
0.39696	0.173052	0.0539
0.39746	0.207558	0.0532828
0.39797	0.172915	0.0547464
0.39847	0.19667	0.0539637
0.39898	0.193692	0.0542395
0.39949	0.204735	0.0553547
0.39999	0.230345	0.0551996
0.4005	0.221452	0.0553473
0.40101	0.102347	0.0555568
0.40151	0.175003	0.0560697
0.40202	0.224183	0.0564911
0.40253	0.229013	0.0560952
0.40303	0.136302	0.0575462
0.40354	0.100422	0.0563633
0.40405	0.07013	0.0564799
0.40455	0.124565	0.0581609
0.40506	0.210155	0.057694
0.40556	0.129277	0.0562553
0.40607	0.193355	0.0574851
0.40658	0.185355	0.0584106
0.40708	0.278185	0.0579823
0.40759	0.20164	0.0578578
0.4081	0.198208	0.0594116
0.4086	0.1999	0.0574862
0.40911	0.187312	0.0577588
0.40962	0.133382	0.0584614
0.41012	0.12587	0.0596098
0.41063	0.19865	0.057977
0.41113	0.154633	0.0583251
0.41164	0.217337	0.0600858
0.41215	0.13454	0.0604124
0.41265	0.16135	0.0595519
0.41316	0.12963	0.059697
0.41367	0.190793	0.0599715
0.41417	0.078915	0.0591951
0.41468	0.191123	0.0589893
0.41518	0.117572	0.0607642
0.41569	0.25142	0.0614338
0.4162	0.136453	0.0600493
0.4167	0.18264	0.0601371
0.41721	0.11965	0.0614177
0.41772	0.205255	0.0606616
0.41822	0.247798	0.0611436
0.41873	0.214243	0.0615492
0.41924	0.202187	0.0624457
0.41974	0.258198	0.0619481
0.42025	0.187745	0.0627247
0.42075	0.153007	0.0636875
0.42126	0.193983	0.062632
0.42177	0.129328	0.0626603
0.42227	0.193442	0.0636498
0.42278	0.176693	0.0645341
0.42329	0.0743375	0.0640572
0.42379	0.17277	0.0643382
0.4243	0.17345	0.0635794
0.42481	0.13126	0.0674004
0.42531	0.107635	0.065308
0.42582	0.0191325	0.0662053
0.42632	0.191472	0.069189
0.42683	0.117142	0.0676412
0.42734	0.18898	0.0659384
0.42784	0.111382	0.0682241
0.42835	0.131137	0.0703198
0.42886	0.13991	0.0695705
0.42936	0.11648	0.0679868
0.42987	0.22189	0.0705946
0.43037	0.17299	0.0709789
0.43088	0.14848	0.0705423
0.43139	0.101917	0.0707246
0.43189	0.16225	0.0723144
0.4324	0.24488	0.0729384
0.43291	0.0949875	0.0719599
0.43341	0.0091175	0.0731665
0.43392	0.120663	0.0746375
0.43443	0.077185	0.0740108
0.43493	0.146792	0.074072
0.43544	0.195538	0.0768646
0.43594	0.195743	0.0771118
0.43645	0.144132	0.0766584
0.43696	0.172813	0.0768769
0.43746	0.106883	0.0808578
0.43797	0.22777	0.0788386
0.43848	0.253097	0.0804248
0.43898	0.24486	0.0798038
0.43949	0.196763	0.0817314
0.43999	0.13191	0.0817436

## Sheet: CAHS_betaine_Tris Fit_4
#q**2_data	ln(I(q))_data	error_data	q**2_fit	ln(I(q))_fit	normalized_residual
0.00012996	2.77549	3.08444	0.000194324	2.72774	-0.0939669
0.000141848	1.89793	5.87029	0.000208514	2.71608	0.0416528
0.000154256	2.4859	2.71109	0.000223502	2.70376	-0.103065
0.000166926	2.36799	2.35078	0.000239012	2.69101	0.0867986
0.000180365	2.63097	1.23261	0.000254722	2.6781	0.0701941
0.000194324	2.62921	1.04866	0.000271261	2.66451	-0.104234
0.000208514	2.74171	0.615321	0.00028832	2.65048	-0.0926672
0.000223502	2.65745	0.449343	0.00030555	2.63632	0.0770451
0.000239012	2.71785	0.309158	0.00032364	2.62145	-0.618305
0.000254722	2.6942	0.229346	0.00034225	2.60616	0.756591
0.000271261	2.64559	0.18151	0.000361	2.59074	-0.0648155
0.00028832	2.63664	0.149357	0.00038064	2.5746	0.353161
0.00030555	2.64577	0.122585	0.0004008	2.55803	0.167174
0.00032364	2.56473	0.0917395	0.00042107	2.54137	-0.874938
0.00034225	2.65659	0.0666597	0.000442261	2.52395	0.0976458
0.000361	2.58684	0.0601827	0.000463972	2.50611	-0.185484
0.00038064	2.5905	0.0450301	0.000485762	2.4882	0.311995
0.0004008	2.56512	0.042393
0.00042107	2.50845	0.0376299
0.000442261	2.52692	0.0304275
0.000463972	2.50063	0.0295345
0.000485762	2.49686	0.0277738
0.000508503	2.46874	0.0259401
0.000531764	2.43311	0.0241429
0.000555074	2.4207	0.0231187

## Sheet: 10B-4
Q	I(Q)	Error
0.0114	27.4	70.5
0.0119	27.5	56.2
0.0124	21.4	45.8
0.0129	23	35.3
0.0134	23.5	24.6
0.0139	22.2	20.4
0.0144	23.6	13.3
0.015	23	8.96
0.0155	23.6	6.69
0.016	23	4.83
0.0165	22	3.73
0.017	22.1	2.99
0.0175	20.9	2.38
0.018	20.9	1.68
0.0185	20.6	1.34
0.019	19.7	1.12
0.0195	19.9	0.86
0.02	20.4	0.797
0.0205	19.5	0.671
0.021	19.3	0.553
0.0215	19.1	0.544
0.022	18.9	0.518
0.0226	18.3	0.436
0.0231	18.2	0.41
0.0236	17.4	0.389
0.0241	16.6	0.382
0.0246	16.8	0.345
0.0251	16.7	0.353
0.0256	16.8	0.335
0.0261	16.2	0.292
0.0266	15.5	0.313
0.0271	14.8	0.292
0.0276	15.2	0.284
0.0281	14.9	0.276
0.0286	14.8	0.268
0.0291	14.5	0.263
0.0297	13.9	0.255
0.0302	13.5	0.252
0.0307	13.1	0.245
0.0312	13	0.245
0.0317	13.2	0.241
0.0322	12.8	0.24
0.0327	12.5	0.245
0.0332	12.1	0.231
0.0337	12.1	0.217
0.0342	11.8	0.226
0.0347	11.6	0.221
0.0352	11.3	0.223
0.0357	11	0.216
0.0362	10.8	0.213
0.0367	10.9	0.215
0.0373	10.7	0.2
0.0378	10.4	0.205
0.0383	10.1	0.197
0.0388	9.87	0.191
0.0393	10	0.191
0.0398	9.57	0.197
0.0403	9.4	0.183
0.0408	9.01	0.189
0.0413	8.75	0.19
0.0418	8.93	0.186
0.0423	8.6	0.184
0.0428	8.3	0.179
0.0433	8.25	0.18
0.0438	8.22	0.175
0.0443	8.06	0.176
0.0449	7.69	0.174
0.0454	7.72	0.168
0.0459	7.49	0.168
0.0464	7.54	0.171
0.0469	7.41	0.169
0.0474	7.17	0.167
0.0479	7.2	0.166
0.0484	6.95	0.161
0.0489	7.05	0.159
0.0494	6.69	0.162
0.0499	6.74	0.159
0.0504	6.71	0.156
0.0509	6.29	0.153
0.0514	6.41	0.151
0.0519	6.5	0.15
0.0525	6.03	0.15
0.053	5.91	0.145
0.0535	5.91	0.15
0.054	5.81	0.149
0.0545	5.62	0.143
0.055	5.82	0.145
0.0555	5.55	0.144
0.056	5.67	0.141
0.0565	5.43	0.139
0.057	5.32	0.14
0.0575	5.28	0.141
0.058	5.23	0.137
0.0585	5.16	0.134
0.059	4.91	0.141
0.0596	5.03	0.128
0.0601	4.93	0.132
0.0606	4.68	0.131
0.0611	4.67	0.132
0.0616	4.61	0.13
0.0621	4.81	0.129
0.0626	4.55	0.131
0.0631	4.29	0.129
0.0636	4.27	0.128
0.0641	4.32	0.125
0.0646	4.25	0.125
0.0651	4.22	0.13
0.0656	4.16	0.124
0.0661	4.18	0.127
0.0666	4.11	0.122
0.0672	4.11	0.126
0.0677	4.01	0.125
0.0682	3.99	0.121
0.0687	3.96	0.121
0.0692	3.76	0.121
0.0697	3.74	0.119
0.0702	3.61	0.12
0.0707	3.71	0.12
0.0712	3.81	0.12
0.0717	3.49	0.119
0.0722	3.64	0.115
0.0727	3.49	0.115
0.0732	3.41	0.117
0.0737	3.44	0.114
0.0742	3.31	0.115
0.0748	3.4	0.112
0.0753	3.26	0.114
0.0758	3.51	0.113
0.0763	3.09	0.108
0.0768	3.53	0.112
0.0773	3.16	0.111
0.0778	3.37	0.11
0.0783	3.02	0.109
0.0788	3.16	0.111
0.0793	3.05	0.11
0.0798	2.96	0.112
0.0803	3.1	0.112
0.0808	3.03	0.113
0.0813	2.85	0.11
0.0818	2.81	0.112
0.0824	2.78	0.109
0.0829	3	0.108
0.0834	2.86	0.114
0.0839	2.75	0.108
0.0844	3.05	0.112
0.0849	2.67	0.107
0.0854	2.74	0.111
0.0859	2.89	0.107
0.0864	2.62	0.106
0.0869	2.6	0.109
0.0874	2.55	0.111
0.0879	2.75	0.109
0.0884	2.73	0.106
0.0889	2.58	0.112
0.0894	2.39	0.105
0.09	2.59	0.108
0.0905	2.46	0.108
0.091	2.54	0.106
0.0915	2.43	0.105
0.092	2.4	0.105
0.0925	2.41	0.104
0.093	2.39	0.104
0.0935	2.23	0.106
0.094	2.34	0.108
0.0945	2.41	0.106
0.095	2.33	0.105
0.0955	2.25	0.105
0.096	2.11	0.103
0.0965	2.37	0.104
0.0971	2.13	0.104
0.0976	2.23	0.105
0.0981	2.2	0.106
0.0986	2.18	0.106
0.0991	2.21	0.106
0.0996	2	0.106
0.1	1.94	0.103
0.101	2.26	0.102
0.101	1.9	0.104
0.102	1.89	0.104
0.102	2.07	0.105
0.103	1.93	0.106
0.103	2.05	0.104
0.104	2	0.102
0.104	1.82	0.0996
0.105	1.77	0.0994
0.105	1.95	0.101
0.106	1.87	0.0995
0.106	1.89	0.101
0.107	1.91	0.0994
0.107	1.77	0.0982
0.108	1.89	0.0969
0.108	1.82	0.0968
0.109	1.9	0.0941
0.109	1.79	0.0979
0.11	1.86	0.0952
0.11	1.76	0.0925
0.111	1.71	0.0939
0.111	1.89	0.0934
0.112	1.75	0.0939
0.112	1.83	0.0929
0.113	1.75	0.0927
0.113	1.6	0.0929
0.114	1.65	0.0923
0.114	1.65	0.0917
0.115	1.76	0.09
0.115	1.63	0.0922
0.116	1.68	0.0899
0.116	1.65	0.0886
0.117	1.7	0.0903
0.117	1.63	0.0899
0.118	1.78	0.0888
0.118	1.55	0.0894
0.119	1.4	0.0872
0.119	1.49	0.0863
0.12	1.59	0.086
0.12	1.63	0.0879
0.121	1.58	0.0855
0.121	1.63	0.0857
0.122	1.48	0.0859
0.122	1.57	0.0855
0.123	1.54	0.0844
0.123	1.63	0.0849
0.124	1.46	0.0849
0.124	1.55	0.0835
0.125	1.4	0.0871
0.125	1.58	0.0847
0.126	1.46	0.0833
0.126	1.5	0.0816
0.127	1.43	0.0806
0.127	1.53	0.0813
0.128	1.36	0.0799
0.128	1.33	0.0806
0.129	1.31	0.0803
0.129	1.31	0.0794
0.13	1.45	0.0798
0.13	1.45	0.0825
0.131	1.31	0.0793
0.132	1.36	0.0809
0.132	1.41	0.0784
0.133	1.37	0.0801
0.133	1.31	0.0788
0.134	1.4	0.0792
0.134	1.34	0.079
0.135	1.31	0.0775
0.135	1.26	0.0783
0.136	1.2	0.0772
0.136	1.29	0.0765
0.137	1.16	0.0768
0.137	1.25	0.0774
0.138	1.27	0.0772
0.138	1.19	0.0772
0.139	1.22	0.076
0.139	1.17	0.0749
0.14	1.25	0.076
0.14	1.07	0.0759
0.141	1.42	0.0748
0.141	1.26	0.0754
0.142	1.12	0.0742
0.142	1.16	0.0764
0.143	1.06	0.074
0.143	1.2	0.0751
0.144	1.21	0.0747
0.144	1.05	0.0749
0.145	1.18	0.0741
0.145	1.12	0.0734
0.146	1.1	0.0739
0.146	1.15	0.0737
0.147	1.19	0.0733
0.147	1.09	0.0715
0.148	1.14	0.0727
0.148	1.24	0.074
0.149	1.14	0.0718
0.149	1.15	0.0714
0.15	1.11	0.0731
0.15	1.08	0.0728
0.151	1.21	0.0721
0.151	1.09	0.0715
0.152	0.945	0.0712
0.152	0.957	0.072
0.153	1.04	0.0707
0.153	1.07	0.0708
0.154	1.09	0.0721
0.154	0.979	0.0709
0.155	0.979	0.0701
0.155	1.07	0.0709
0.156	1.02	0.0704
0.156	1.09	0.0695
0.157	0.975	0.0702
0.157	1.03	0.0711
0.158	1.02	0.0689
0.158	0.955	0.0682
0.159	0.959	0.0689
0.159	1.03	0.0692
0.16	1.06	0.0688
0.16	1.08	0.069
0.161	1.01	0.069
0.161	0.993	0.069
0.162	0.957	0.067
0.162	0.88	0.0679
0.163	0.935	0.0675
0.163	0.993	0.0675
0.164	0.887	0.0678
0.164	0.906	0.0676
0.165	0.889	0.0668
0.165	0.967	0.0664
0.166	0.966	0.067
0.166	0.845	0.0673
0.167	0.866	0.0664
0.167	0.842	0.0668
0.168	0.82	0.0675
0.168	0.96	0.0685
0.169	0.841	0.0671
0.17	0.959	0.0678
0.17	0.871	0.0682
0.171	0.891	0.0678
0.171	0.837	0.0674
0.172	0.94	0.0691
0.172	0.924	0.0684
0.173	0.872	0.0678
0.173	0.795	0.0685
0.174	0.878	0.0692
0.174	0.863	0.0683
0.175	0.826	0.069
0.175	0.904	0.0686
0.176	0.917	0.069
0.176	0.906	0.0677
0.177	0.834	0.0681
0.177	0.82	0.0676
0.178	0.773	0.0679
0.178	0.826	0.0679
0.179	0.77	0.0688
0.179	0.805	0.0691
0.18	0.792	0.0669
0.18	0.797	0.0685
0.181	0.796	0.0675
0.181	0.827	0.0675
0.182	0.828	0.068
0.182	0.745	0.0696
0.183	0.767	0.0695
0.183	0.786	0.0695
0.184	0.777	0.0697
0.184	0.827	0.0698
0.185	0.705	0.0692
0.185	0.822	0.0715
0.186	0.767	0.0696
0.186	0.79	0.0693
0.187	0.834	0.0708
0.187	0.789	0.0704
0.188	0.672	0.0714
0.188	0.684	0.0714
0.189	0.745	0.0724
0.189	0.706	0.0736
0.19	0.746	0.0719
0.19	0.802	0.0735
0.191	0.671	0.073
0.191	0.863	0.0731
0.192	0.677	0.0717
0.192	0.713	0.0718
0.193	0.638	0.0719
0.193	0.739	0.0727
0.194	0.625	0.072
0.194	0.733	0.0723
0.195	0.733	0.0725
0.195	0.694	0.0726
0.196	0.644	0.0734
0.196	0.656	0.0736
0.197	0.785	0.0735
0.197	0.666	0.0718
0.198	0.715	0.0727
0.198	0.711	0.0731
0.199	0.819	0.0728
0.199	0.671	0.0726
0.2	0.701	0.0738
0.2	0.679	0.0728
0.201	0.688	0.0728
0.201	0.553	0.073
0.202	0.782	0.0741
0.202	0.678	0.0735
0.203	0.757	0.0746
0.203	0.554	0.0738
0.204	0.661	0.0739
0.204	0.702	0.0738
0.205	0.761	0.0734
0.205	0.654	0.0733
0.206	0.606	0.0735
0.207	0.752	0.074
0.207	0.628	0.0745
0.208	0.628	0.0719
0.208	0.654	0.0731
0.209	0.627	0.0735
0.209	0.717	0.0743
0.21	0.578	0.0729
0.21	0.693	0.0729
0.211	0.707	0.0738
0.211	0.58	0.0733
0.212	0.623	0.0729
0.212	0.667	0.0723
0.213	0.603	0.0735
0.213	0.634	0.0729
0.214	0.706	0.0725
0.214	0.495	0.0732
0.215	0.633	0.074
0.215	0.49	0.0731
0.216	0.655	0.073
0.216	0.683	0.0733
0.217	0.571	0.0723
0.217	0.436	0.0714
0.218	0.53	0.0727
0.218	0.65	0.0724
0.219	0.548	0.0731
0.219	0.629	0.0744
0.22	0.584	0.0736
0.22	0.648	0.0724
0.221	0.604	0.0717
0.221	0.66	0.0712
0.222	0.64	0.0716
0.222	0.629	0.0713
0.223	0.546	0.072
0.223	0.582	0.0719
0.224	0.645	0.0705
0.224	0.615	0.0712
0.225	0.655	0.0713
0.225	0.51	0.0705
0.226	0.536	0.07
0.226	0.529	0.0704
0.227	0.579	0.0699
0.227	0.626	0.0682
0.228	0.654	0.0696
0.228	0.552	0.0697
0.229	0.696	0.0704
0.229	0.483	0.0677
0.23	0.602	0.0686
0.23	0.582	0.0683
0.231	0.636	0.0674
0.231	0.454	0.0675
0.232	0.74	0.0675
0.232	0.455	0.0678
0.233	0.565	0.0684
0.233	0.627	0.067
0.234	0.433	0.0679
0.234	0.499	0.0678
0.235	0.513	0.0658
0.235	0.566	0.0664
0.236	0.604	0.0669
0.236	0.531	0.067
0.237	0.698	0.0653
0.237	0.492	0.0656
0.238	0.475	0.0658
0.238	0.54	0.0665
0.239	0.606	0.0661
0.239	0.567	0.0647
0.24	0.465	0.065
0.24	0.529	0.0651
0.241	0.509	0.0658
0.241	0.501	0.064
0.242	0.454	0.0641
0.242	0.501	0.0657
0.243	0.486	0.0639
0.243	0.478	0.0648
0.244	0.472	0.0641
0.244	0.587	0.0644
0.245	0.468	0.064
0.246	0.507	0.064
0.246	0.427	0.0639
0.247	0.476	0.0641
0.247	0.47	0.0644
0.248	0.547	0.0637
0.248	0.429	0.0633
0.249	0.532	0.0631
0.249	0.426	0.0628
0.25	0.402	0.0633
0.25	0.572	0.0624
0.251	0.464	0.0625
0.251	0.486	0.063
0.252	0.595	0.0629
0.252	0.434	0.0623
0.253	0.524	0.0623
0.253	0.478	0.0633
0.254	0.471	0.0605
0.254	0.613	0.061
0.255	0.505	0.0615
0.255	0.561	0.0617
0.256	0.485	0.0619
0.256	0.433	0.0612
0.257	0.474	0.0605
0.257	0.494	0.0601
0.258	0.437	0.0601
0.258	0.536	0.0599
0.259	0.414	0.0603
0.259	0.474	0.0611
0.26	0.505	0.0604
0.26	0.507	0.0598
0.261	0.493	0.0596
0.261	0.486	0.0591
0.262	0.516	0.0597
0.262	0.472	0.0588
0.263	0.431	0.0595
0.263	0.494	0.0589
0.264	0.452	0.0585
0.264	0.474	0.0597
0.265	0.397	0.0586
0.265	0.47	0.0593
0.266	0.487	0.0587
0.266	0.509	0.0594
0.267	0.473	0.0587
0.267	0.506	0.0587
0.268	0.393	0.0592
0.268	0.448	0.0578
0.269	0.484	0.0581
0.269	0.435	0.0572
0.27	0.446	0.0587
0.27	0.419	0.0586
0.271	0.513	0.0588
0.271	0.442	0.0578
0.272	0.481	0.058
0.272	0.418	0.0577
0.273	0.478	0.0573
0.273	0.384	0.0578
0.274	0.377	0.0578
0.274	0.457	0.0579
0.275	0.454	0.0571
0.275	0.456	0.0568
0.276	0.442	0.0566
0.276	0.406	0.0571
0.277	0.374	0.0572
0.277	0.494	0.0561
0.278	0.452	0.0567
0.278	0.386	0.0569
0.279	0.327	0.0567
0.279	0.429	0.0574
0.28	0.471	0.0569
0.28	0.441	0.057
0.281	0.414	0.057
0.281	0.398	0.057
0.282	0.492	0.0566
0.282	0.466	0.056
0.283	0.436	0.0564
0.284	0.322	0.0556
0.284	0.409	0.0565
0.285	0.485	0.0561
0.285	0.429	0.0556
0.286	0.346	0.0559
0.286	0.408	0.0552
0.287	0.511	0.0554
0.287	0.332	0.0555
0.288	0.398	0.0555
0.288	0.307	0.0556
0.289	0.433	0.0559
0.289	0.445	0.0558
0.29	0.487	0.0553
0.29	0.436	0.0556
0.291	0.311	0.0556
0.291	0.371	0.0563
0.292	0.386	0.0553
0.292	0.384	0.0558
0.293	0.35	0.0557
0.293	0.4	0.0551
0.294	0.428	0.0563
0.294	0.411	0.0561
0.295	0.401	0.0555
0.295	0.381	0.0562
0.296	0.394	0.0559
0.296	0.354	0.057
0.297	0.367	0.0559
0.297	0.365	0.0558
0.298	0.437	0.0555
0.298	0.449	0.0556
0.299	0.333	0.0545
0.299	0.35	0.0549
0.3	0.38	0.0558
0.3	0.368	0.0561
0.301	0.434	0.0548
0.301	0.348	0.055
0.302	0.388	0.0549
0.302	0.394	0.0555
0.303	0.392	0.0554
0.303	0.48	0.0552
0.304	0.429	0.0547
0.304	0.28	0.0555
0.305	0.335	0.0542
0.305	0.354	0.0553
0.306	0.338	0.0544
0.306	0.396	0.0543
0.307	0.352	0.0545
0.307	0.313	0.0558
0.308	0.412	0.0554
0.308	0.327	0.0554
0.309	0.361	0.0556
0.309	0.449	0.0551
0.31	0.458	0.0559
0.31	0.35	0.0558
0.311	0.352	0.0559
0.311	0.372	0.0555
0.312	0.369	0.0562
0.312	0.302	0.0572
0.313	0.265	0.0576
0.313	0.371	0.0576
0.314	0.296	0.0572
0.314	0.305	0.0571
0.315	0.239	0.0573
0.315	0.311	0.0582
0.316	0.281	0.0581
0.316	0.321	0.059
0.317	0.357	0.0584
0.317	0.309	0.0585
0.318	0.398	0.0583
0.318	0.327	0.0583
0.319	0.331	0.059
0.319	0.292	0.0596
0.32	0.335	0.0582
0.32	0.373	0.0593
0.321	0.32	0.0602
0.321	0.306	0.059
0.322	0.347	0.0587
0.323	0.364	0.0595
0.323	0.346	0.0603
0.324	0.361	0.0591
0.324	0.327	0.0595
0.325	0.321	0.0578
0.325	0.286	0.0589
0.326	0.285	0.0588
0.326	0.337	0.059
0.327	0.334	0.0594
0.327	0.363	0.0596
0.328	0.295	0.0589
0.328	0.39	0.0589
0.329	0.273	0.0595
0.329	0.374	0.0587
0.33	0.292	0.0592
0.33	0.246	0.0593
0.331	0.307	0.0598
0.331	0.361	0.06
0.332	0.333	0.06
0.332	0.243	0.0598
0.333	0.274	0.0607
0.333	0.356	0.0603
0.334	0.317	0.061
0.334	0.295	0.0597
0.335	0.387	0.0608
0.335	0.327	0.0603
0.336	0.231	0.0605
0.336	0.297	0.0614
0.337	0.296	0.0595
0.337	0.285	0.0612
0.338	0.31	0.0617
0.338	0.391	0.0601
0.339	0.267	0.0612
0.339	0.334	0.0607
0.34	0.27	0.0599
0.34	0.307	0.061
0.341	0.243	0.0617
0.341	0.337	0.0606
0.342	0.434	0.0614
0.342	0.326	0.0607
0.343	0.217	0.0613
0.343	0.366	0.0605
0.344	0.279	0.061
0.344	0.381	0.0606
0.345	0.312	0.0613
0.345	0.282	0.0608
0.346	0.26	0.0613
0.346	0.358	0.0617
0.347	0.265	0.0605
0.347	0.234	0.061
0.348	0.321	0.0615
0.348	0.297	0.0612
0.349	0.351	0.0609
0.349	0.225	0.0604
0.35	0.221	0.0615
0.35	0.269	0.0615
0.351	0.313	0.0601
0.351	0.367	0.0622
0.352	0.335	0.0627
0.352	0.309	0.0607
0.353	0.287	0.06
0.353	0.343	0.0614
0.354	0.343	0.0616
0.354	0.299	0.0621
0.355	0.295	0.0598
0.355	0.29	0.0596
0.356	0.229	0.0583
0.356	0.246	0.058
0.357	0.286	0.0581
0.357	0.252	0.0583
0.358	0.304	0.0574
0.358	0.295	0.0573
0.359	0.359	0.0582
0.359	0.252	0.0579
0.36	0.243	0.0589
0.36	0.251	0.0597
0.361	0.28	0.0594
0.362	0.264	0.0585
0.362	0.315	0.0591
0.363	0.241	0.0598
0.363	0.221	0.0596
0.364	0.221	0.0596
0.364	0.306	0.0595
0.365	0.372	0.0607
0.365	0.334	0.0601
0.366	0.307	0.0597
0.366	0.287	0.0609
0.367	0.299	0.0603
0.367	0.292	0.0605
0.368	0.212	0.06
0.368	0.199	0.0604
0.369	0.175	0.0613
0.369	0.266	0.0624
0.37	0.281	0.062
0.37	0.25	0.063
0.371	0.274	0.0624
0.371	0.143	0.063
0.372	0.211	0.0639
0.372	0.293	0.0633
0.373	0.305	0.0634
0.373	0.335	0.0636
0.374	0.316	0.0631
0.374	0.278	0.0633
0.375	0.168	0.0639
0.375	0.26	0.0656
0.376	0.245	0.0632
0.376	0.296	0.0644
0.377	0.277	0.0652
0.377	0.312	0.0646
0.378	0.268	0.0652
0.378	0.298	0.0653
0.379	0.232	0.0662
0.379	0.247	0.0666
0.38	0.284	0.0663
0.38	0.277	0.067
0.381	0.0602	0.0676
0.381	0.335	0.0679
0.382	0.349	0.0672
0.382	0.367	0.0683
0.383	0.315	0.0695
0.383	0.282	0.0672
0.384	0.311	0.0676
0.384	0.332	0.0687
0.385	0.383	0.0693
0.385	0.277	0.0696
0.386	0.277	0.0696
0.386	0.239	0.0695
0.387	0.224	0.0701
0.387	0.367	0.0713
0.388	0.336	0.0706
0.388	0.358	0.0701
0.389	0.297	0.0716
0.389	0.284	0.0718
0.39	0.144	0.072
0.39	0.168	0.0726
0.391	0.39	0.0721
0.391	0.348	0.0727
0.392	0.334	0.0728
0.392	0.277	0.074
0.393	0.13	0.073
0.393	0.259	0.0739
0.394	0.278	0.0742
0.394	0.261	0.0731
0.395	0.239	0.0746
0.395	0.324	0.0753
0.396	0.326	0.0756
0.396	0.171	0.0787
0.397	0.129	0.0771
0.397	0.25	0.0767
0.398	0.259	0.0767
0.398	0.237	0.0778
0.399	0.194	0.0786
0.399	0.193	0.0791
0.4	0.283	0.078
0.401	0.34	0.0788
0.401	0.321	0.0807
0.402	0.315	0.077
0.402	0.255	0.0796
0.403	0.358	0.0813
0.403	0.226	0.0807
0.404	0.274	0.0801
0.404	0.222	0.0804
0.405	0.307	0.0806
0.405	0.36	0.0809
0.406	0.286	0.0812
0.406	0.376	0.0837
0.407	0.154	0.082
0.407	0.291	0.0809
0.408	0.219	0.0831
0.408	0.395	0.0835
0.409	0.207	0.0827
0.409	0.244	0.0829
0.41	0.236	0.0819
0.41	0.184	0.0838
0.411	0.29	0.0816
0.411	0.208	0.0812
0.412	0.408	0.0866
0.412	0.22	0.0839
0.413	0.216	0.0816
0.413	0.155	0.0836
0.414	0.266	0.0857
0.414	0.181	0.0846
0.415	0.181	0.0845
0.415	0.366	0.0874
0.416	0.282	0.0864
0.416	0.204	0.0841
0.417	0.193	0.0865
0.417	0.409	0.0885
0.418	0.138	0.0875
0.418	0.215	0.085
0.419	0.205	0.0863
0.419	0.251	0.0884
0.42	0.186	0.0888
0.42	0.34	0.0863
0.421	0.386	0.0904
0.421	0.2	0.0889
0.422	0.256	0.0891
0.422	0.325	0.0929
0.423	0.0994	0.0936
0.423	0.262	0.0918
0.424	0.326	0.0904
0.424	0.237	0.094
0.425	0.392	0.0968
0.425	0.33	0.0928
0.426	0.281	0.0907
0.426	0.291	0.0975
0.427	0.129	0.0962
0.427	0.278	0.0973
0.428	0.246	0.096
0.428	0.317	0.0973
0.429	0.232	0.0976
0.429	0.102	0.0962
0.43	0.334	0.0991
0.43	0.101	0.102
0.431	0.326	0.101
0.431	0.308	0.101
0.432	0.129	0.102
0.432	0.25	0.103
0.433	0.254	0.103
0.433	0.179	0.105
0.434	0.252	0.108
0.434	0.091	0.105
0.435	0.24	0.11
0.435	0.225	0.108
0.436	0.284	0.108
0.436	0.194	0.112
0.437	0.358	0.113
0.437	0.0738	0.112
0.438	0.363	0.114
0.438	0.303	0.115
0.439	0.247	0.115
0.439	0.177	0.116
0.44	0.133	0.119

## Sheet: 10B Fit-4
#q**2_data	ln(I(q))_data	error_data	q**2_fit	ln(I(q))_fit	normalized_residual
0.00012996	3.31112	2.57146	0.000166926	3.14697	-0.00836523
0.000141848	3.31413	2.04539	0.000180365	3.13792	0.0178869
0.000154256	3.0636	2.13911	0.000194324	3.12851	-0.0303043
0.000166926	3.13411	1.53721	0.000208514	3.11895	0.074955
0.000180365	3.15666	1.04787	0.000223502	3.10885	0.0714438
0.000194324	3.10072	0.917237	0.000239012	3.0984	0.228794
0.000208514	3.16128	0.564711	0.000254722	3.08782	0.231497
0.000223502	3.13667	0.389318	0.000271261	3.07668	0.080692
0.000239012	3.16317	0.283057	0.00028832	3.06518	0.239781
0.000254722	3.13642	0.209927	0.00030555	3.05358	-0.102507
0.000271261	3.09038	0.169833	0.00032364	3.04139	-0.0280107
0.00028832	3.09752	0.134844	0.00034225	3.02885	-0.0269268
0.00030555	3.04192	0.113729	0.000361	3.01622	-0.616269
0.00032364	3.03914	0.0802242	0.00038064	3.00299	-0.292091
0.00034225	3.0271	0.0650541	0.0004008	2.9894	0.674919
0.000361	2.98122	0.0567834	0.00042107	2.97575	-0.107191
0.00038064	2.99035	0.0432515	0.000442261	2.96147	-0.0714063
0.0004008	3.01578	0.0390797	0.000463972	2.94684	0.11006
0.00042107	2.97207	0.0343553	0.000485762	2.93216	0.246582
0.000442261	2.95942	0.028667	0.000508503	2.91684	-0.339648
0.000463972	2.94998	0.0284584	0.000531764	2.90117	0.102389
0.000485762	2.93892	0.0273999
0.000508503	2.90876	0.0238047
0.000531764	2.90347	0.0224859
0.000555074	2.85743	0.0223581
0.000579365	2.81203	0.0229347
0.000604176	2.82142	0.0205202

## Sheet: 100B-4
Q	I(Q)	Error
0.0114	24.1617	49.871
0.01191	24.185	40.0624
0.01242	22.4315	32.9183
0.01292	28.5485	25.5165
0.01343	25.6314	17.5321
0.01394	23.2739	14.5464
0.01444	23.3071	9.59999
0.01495	23.5074	6.34153
0.01546	24.3314	4.76629
0.01596	22.1147	3.42337
0.01647	21.5743	2.65848
0.01698	21.3166	2.142
0.01748	20.8819	1.73281
0.01799	21.0664	1.22103
0.0185	20.9287	0.966138
0.019	20.3057	0.777762
0.01951	19.6257	0.597909
0.02002	19.7465	0.543635
0.02052	19.3495	0.479437
0.02103	18.8699	0.402544
0.02154	18.8087	0.379561
0.02204	18.657	0.367582
0.02255	18.0755	0.328315
0.02306	17.5001	0.296438
0.02356	17.2675	0.276636
0.02407	16.8127	0.261426
0.02458	16.296	0.251044
0.02509	16.6473	0.23906
0.02559	16.1146	0.224658
0.0261	15.8598	0.217045
0.02661	15.3723	0.21082
0.02711	15.3959	0.211905
0.02762	15.2291	0.19577
0.02813	14.4579	0.19886
0.02863	14.1815	0.196515
0.02914	14.0829	0.191454
0.02965	13.9161	0.185193
0.03015	13.4493	0.184959
0.03066	13.1162	0.18131
0.03117	12.9067	0.171985
0.03167	12.661	0.175733
0.03218	12.707	0.169992
0.03269	12.3253	0.162643
0.03319	11.9594	0.157337
0.0337	11.9192	0.159708
0.03421	11.3113	0.156075
0.03471	11.2831	0.159075
0.03522	11.3695	0.150241
0.03573	11.0334	0.154023
0.03623	10.7906	0.150513
0.03674	10.6399	0.147926
0.03725	10.4272	0.142132
0.03775	10.0236	0.14339
0.03826	9.91694	0.139134
0.03877	9.82048	0.138217
0.03927	9.3841	0.137392
0.03978	9.67279	0.138018
0.04029	9.28299	0.136468
0.0408	8.89509	0.13383
0.0413	8.89129	0.132894
0.04181	8.91444	0.129999
0.04232	8.56727	0.128033
0.04282	8.57025	0.126788
0.04333	8.3831	0.125868
0.04384	8.31941	0.124023
0.04434	8.00887	0.124923
0.04485	7.89123	0.124584
0.04536	7.6973	0.124618
0.04586	7.58708	0.118479
0.04637	7.44433	0.11858
0.04688	7.38834	0.119611
0.04738	7.35422	0.116736
0.04789	7.18068	0.115319
0.0484	6.88513	0.117409
0.0489	6.86735	0.11421
0.04941	6.62147	0.114619
0.04992	6.487	0.112425
0.05042	6.40785	0.112433
0.05093	6.46723	0.111068
0.05144	6.16508	0.107843
0.05194	6.26228	0.107036
0.05245	6.064	0.10277
0.05296	6.03103	0.103539
0.05346	5.7945	0.103524
0.05397	5.7662	0.105399
0.05448	5.77252	0.101594
0.05498	5.75889	0.100547
0.05549	5.57637	0.100425
0.056	5.47863	0.10141
0.0565	5.30126	0.101422
0.05701	5.31015	0.10004
0.05752	5.15849	0.0990806
0.05803	5.16072	0.0965784
0.05853	5.13856	0.0983592
0.05904	4.99021	0.098851
0.05955	5.02336	0.0923768
0.06005	4.85224	0.0947197
0.06056	4.67622	0.0939945
0.06107	4.68349	0.0915313
0.06157	4.7369	0.0908712
0.06208	4.56158	0.0912452
0.06259	4.48469	0.0936438
0.06309	4.45447	0.0910681
0.0636	4.35588	0.088611
0.06411	4.54476	0.0909283
0.06461	4.18702	0.0878525
0.06512	4.31669	0.0894565
0.06563	4.36156	0.088876
0.06613	4.0791	0.0885133
0.06664	4.03948	0.0866035
0.06715	4.13689	0.0878067
0.06765	3.97735	0.0872845
0.06816	3.85853	0.0862901
0.06867	3.90065	0.0850738
0.06917	3.87564	0.0847627
0.06968	3.74835	0.084524
0.07019	3.79443	0.0841681
0.07069	3.60389	0.081979
0.0712	3.70992	0.0841848
0.07171	3.60998	0.0827494
0.07221	3.60525	0.0808518
0.07272	3.4574	0.0835041
0.07323	3.57539	0.081608
0.07373	3.45519	0.0803084
0.07424	3.45024	0.0802805
0.07475	3.31031	0.0800756
0.07526	3.4155	0.0791083
0.07576	3.26227	0.0788616
0.07627	3.40705	0.0788093
0.07678	3.21513	0.0780719
0.07728	3.05498	0.0772217
0.07779	3.13749	0.0781448
0.0783	3.08469	0.0770577
0.0788	3.0077	0.0767883
0.07931	3.06843	0.0780956
0.07982	2.9757	0.0785231
0.08032	2.92801	0.0789856
0.08083	3.03597	0.0796267
0.08134	2.97687	0.078534
0.08184	2.85578	0.0797287
0.08235	2.93534	0.0792305
0.08286	2.66996	0.0781764
0.08336	2.91506	0.0796236
0.08387	2.83236	0.077456
0.08438	2.61281	0.0769666
0.08488	2.61447	0.076741
0.08539	2.6545	0.078693
0.0859	2.64492	0.077663
0.0864	2.58786	0.0779472
0.08691	2.58841	0.0775849
0.08742	2.62644	0.0773321
0.08792	2.58462	0.0771393
0.08843	2.45319	0.0762949
0.08894	2.43781	0.0762917
0.08944	2.54745	0.0761234
0.08995	2.529	0.0767949
0.09046	2.50445	0.0767056
0.09096	2.43755	0.0758486
0.09147	2.31546	0.0750588
0.09198	2.38675	0.0740504
0.09248	2.40376	0.0734624
0.09299	2.33685	0.0732777
0.0935	2.38826	0.0748885
0.09401	2.3142	0.0759237
0.09451	2.22765	0.0743362
0.09502	2.19188	0.0742687
0.09553	2.20736	0.073667
0.09603	2.24618	0.075121
0.09654	2.17258	0.0738062
0.09705	2.17349	0.0744907
0.09755	2.13185	0.0738095
0.09806	2.05359	0.0721234
0.09857	1.98329	0.0739366
0.09907	2.1212	0.0739877
0.09958	2.10804	0.0737745
0.10009	2.01317	0.0726088
0.10059	2.05824	0.0734324
0.1011	2.0253	0.0743739
0.10161	2.10085	0.0747911
0.10211	1.962	0.0747713
0.10262	2.03577	0.0751066
0.10313	2.05127	0.0739969
0.10363	1.93406	0.0723704
0.10414	1.93277	0.0714808
0.10465	1.86766	0.0722849
0.10515	1.82033	0.0702695
0.10566	1.87425	0.0704656
0.10617	1.90851	0.0715361
0.10667	1.89695	0.0701385
0.10718	1.9915	0.0704547
0.10769	1.89556	0.070483
0.10819	1.78925	0.0701694
0.1087	1.87291	0.0683816
0.10921	1.80638	0.0676177
0.10971	1.8339	0.0674588
0.11022	1.68213	0.0661125
0.11073	1.72305	0.0665939
0.11123	1.82573	0.0667576
0.11174	1.68951	0.0670577
0.11225	1.75829	0.0652242
0.11275	1.66823	0.0646525
0.11326	1.82407	0.0659036
0.11377	1.63289	0.0642769
0.11428	1.74515	0.0646951
0.11478	1.66362	0.0650703
0.11529	1.70366	0.0635198
0.1158	1.62174	0.0629758
0.1163	1.61481	0.0631304
0.11681	1.52881	0.0635975
0.11732	1.59963	0.0622758
0.11782	1.57797	0.0634085
0.11833	1.56678	0.0616834
0.11884	1.62661	0.0628261
0.11934	1.57817	0.0611073
0.11985	1.56106	0.0609897
0.12036	1.52397	0.0617533
0.12086	1.58358	0.0610645
0.12137	1.46035	0.0606821
0.12188	1.48601	0.0603029
0.12238	1.56263	0.0606442
0.12289	1.43597	0.0611574
0.1234	1.55089	0.060252
0.1239	1.54926	0.0598479
0.12441	1.4661	0.0585092
0.12492	1.49498	0.0590799
0.12542	1.42508	0.0591097
0.12593	1.45957	0.0590177
0.12644	1.5543	0.0581028
0.12694	1.45385	0.0578201
0.12745	1.4392	0.0584982
0.12796	1.37671	0.0573878
0.12846	1.43416	0.0576461
0.12897	1.30676	0.0575374
0.12948	1.32447	0.0564485
0.12998	1.34598	0.0565511
0.13049	1.40972	0.0570537
0.131	1.37665	0.0567353
0.1315	1.34847	0.0563473
0.13201	1.31261	0.0559562
0.13252	1.23812	0.0560934
0.13302	1.32811	0.0554618
0.13353	1.35636	0.0551128
0.13404	1.31007	0.055612
0.13454	1.32133	0.055304
0.13505	1.31468	0.0561975
0.13556	1.26798	0.0554433
0.13606	1.32229	0.0551251
0.13657	1.25548	0.0548351
0.13708	1.2172	0.0554288
0.13758	1.26357	0.053971
0.13809	1.25541	0.0546933
0.1386	1.25448	0.0543911
0.13911	1.23481	0.0545454
0.13961	1.23734	0.0538884
0.14012	1.22843	0.0537231
0.14063	1.23981	0.0537296
0.14113	1.24022	0.0524867
0.14164	1.16159	0.0534445
0.14215	1.16426	0.0532208
0.14265	1.20023	0.0533331
0.14316	1.1622	0.0526061
0.14367	1.12529	0.0531442
0.14417	1.0956	0.0522575
0.14468	1.24521	0.0522354
0.14519	1.09496	0.0526086
0.14569	1.10376	0.0520624
0.1462	1.16745	0.0512414
0.14671	1.12459	0.0516729
0.14721	1.09045	0.0520117
0.14772	1.18417	0.0520088
0.14823	1.07617	0.0515899
0.14873	1.15336	0.0517204
0.14924	1.13494	0.0510393
0.14975	1.11827	0.0509081
0.15025	1.09353	0.0514012
0.15076	0.99759	0.0504377
0.15127	1.09064	0.0509229
0.15177	1.01039	0.0510152
0.15228	1.0137	0.0502669
0.15279	0.94947	0.0501263
0.15329	1.08962	0.049525
0.1538	1.09136	0.0503089
0.15431	1.05934	0.0497726
0.15481	1.02177	0.0505227
0.15532	1.04738	0.0500513
0.15583	1.05789	0.0497865
0.15633	1.06716	0.0497025
0.15684	0.974993	0.0496374
0.15735	1.04812	0.0496941
0.15785	1.0711	0.0500883
0.15836	0.960512	0.0482848
0.15887	1.03414	0.0491416
0.15937	0.995962	0.0492237
0.15988	1.05817	0.0488062
0.16039	0.927523	0.0481435
0.16089	1.02359	0.0489207
0.1614	0.979973	0.048049
0.16191	0.960967	0.0479477
0.16241	0.978648	0.0479216
0.16292	0.914183	0.0479924
0.16343	0.994315	0.0479006
0.16393	0.88501	0.0479598
0.16444	0.963257	0.0484611
0.16495	0.993265	0.0464145
0.16545	0.983792	0.0474886
0.16596	0.910968	0.0472798
0.16647	0.994735	0.047193
0.16697	1.00072	0.0465862
0.16748	0.96429	0.0477244
0.16799	0.869382	0.0475685
0.16849	0.902397	0.0479211
0.169	0.888807	0.0482361
0.16951	0.8657	0.0482574
0.17001	0.9006	0.0488653
0.17052	1.0229	0.0485189
0.17103	0.921693	0.0478282
0.17153	0.837078	0.0482251
0.17204	0.803408	0.0480812
0.17255	0.876555	0.0482897
0.17305	0.889565	0.0485324
0.17356	0.910425	0.0485461
0.17407	0.8347	0.0482398
0.17457	0.898115	0.0492638
0.17508	0.902053	0.0483082
0.17559	0.816298	0.0486086
0.1761	0.921005	0.0484794
0.1766	0.874587	0.04856
0.17711	0.89002	0.0490049
0.17762	0.83039	0.0480789
0.17812	0.79786	0.0483014
0.17863	0.721995	0.0487883
0.17914	0.835387	0.0485318
0.17964	0.871762	0.0480171
0.18015	0.850815	0.0478476
0.18066	0.805933	0.0483486
0.18116	0.800898	0.0477653
0.18167	0.80458	0.0482798
0.18218	0.709963	0.0494508
0.18268	0.855405	0.0488702
0.18319	0.7852	0.0493975
0.1837	0.81793	0.0491804
0.1842	0.8093	0.0501824
0.18471	0.879147	0.0489652
0.18522	0.798813	0.0502851
0.18572	0.820952	0.0509039
0.18623	0.840915	0.0501223
0.18674	0.75572	0.0500702
0.18724	0.76591	0.049922
0.18775	0.73701	0.0514218
0.18826	0.76852	0.0508766
0.18876	0.799667	0.0505439
0.18927	0.771887	0.0508459
0.18978	0.748452	0.0508277
0.19028	0.803805	0.0513328
0.19079	0.653643	0.0511166
0.1913	0.755045	0.0510477
0.1918	0.661343	0.0507649
0.19231	0.704272	0.0507919
0.19282	0.786563	0.0516459
0.19332	0.77048	0.0513967
0.19383	0.748023	0.0518597
0.19434	0.7771	0.0515093
0.19484	0.684708	0.051108
0.19535	0.77254	0.051389
0.19586	0.759097	0.0513647
0.19636	0.684865	0.0520884
0.19687	0.705307	0.0518829
0.19738	0.763073	0.0518093
0.19788	0.763938	0.0520992
0.19839	0.805532	0.0515177
0.1989	0.747217	0.0513831
0.1994	0.745032	0.0518064
0.19991	0.6873	0.0527384
0.20042	0.682723	0.0518692
0.20092	0.725278	0.0518363
0.20143	0.699255	0.0521618
0.20194	0.67239	0.0526657
0.20244	0.670027	0.0516891
0.20295	0.690213	0.0519681
0.20346	0.70863	0.0522894
0.20396	0.657175	0.0525213
0.20447	0.675127	0.0514756
0.20498	0.658772	0.0513343
0.20548	0.732692	0.0520343
0.20599	0.70863	0.0514955
0.2065	0.690545	0.051502
0.207	0.679122	0.0516162
0.20751	0.607498	0.0518815
0.20802	0.68227	0.0516327
0.20852	0.60067	0.0523385
0.20903	0.580545	0.0525228
0.20954	0.618677	0.0518463
0.21004	0.647452	0.0515509
0.21055	0.60787	0.0525607
0.21106	0.701592	0.0520557
0.21156	0.65358	0.0520692
0.21207	0.722287	0.0521969
0.21258	0.593435	0.0523968
0.21308	0.625687	0.0520341
0.21359	0.626067	0.0517256
0.2141	0.690468	0.052348
0.2146	0.579893	0.0513284
0.21511	0.678323	0.0524407
0.21562	0.61303	0.0515159
0.21612	0.690555	0.0516319
0.21663	0.603925	0.0514153
0.21714	0.678645	0.0512332
0.21764	0.588867	0.0516522
0.21815	0.604765	0.0512595
0.21866	0.61851	0.0518269
0.21916	0.564875	0.0510471
0.21967	0.59315	0.0521058
0.22018	0.576198	0.0510307
0.22068	0.537467	0.0507893
0.22119	0.565007	0.0515331
0.2217	0.652018	0.0512352
0.2222	0.575588	0.0502832
0.22271	0.637132	0.050538
0.22322	0.65942	0.0507564
0.22372	0.652983	0.0502957
0.22423	0.583607	0.0498713
0.22474	0.579835	0.0502827
0.22524	0.6234	0.0495815
0.22575	0.57695	0.0494277
0.22626	0.532	0.0496163
0.22676	0.65845	0.0497302
0.22727	0.543218	0.0490713
0.22778	0.590137	0.0494818
0.22828	0.542652	0.04937
0.22879	0.583433	0.048562
0.2293	0.564052	0.0490809
0.2298	0.575725	0.0488925
0.23031	0.574555	0.0486605
0.23082	0.538575	0.047908
0.23132	0.61692	0.0478946
0.23183	0.569265	0.0484997
0.23234	0.542057	0.0475756
0.23284	0.555728	0.0473822
0.23335	0.546215	0.0486178
0.23386	0.572315	0.0480857
0.23436	0.59587	0.0471654
0.23487	0.548802	0.0470784
0.23538	0.51089	0.0471872
0.23588	0.625175	0.0470009
0.23639	0.46724	0.0464595
0.2369	0.565898	0.0469383
0.2374	0.545828	0.0468483
0.23791	0.63586	0.0468029
0.23842	0.518575	0.0467201
0.23892	0.569285	0.0472911
0.23943	0.510153	0.0465503
0.23994	0.529332	0.0464792
0.24044	0.532188	0.0459168
0.24095	0.408215	0.0458886
0.24145	0.5326	0.0457997
0.24196	0.526637	0.0462751
0.24247	0.573863	0.0456932
0.24297	0.467822	0.0455906
0.24348	0.511938	0.045822
0.24399	0.520135	0.046057
0.24449	0.406625	0.0451124
0.245	0.435613	0.0456221
0.24551	0.52784	0.0455038
0.24601	0.518005	0.0448036
0.24652	0.509665	0.0452646
0.24703	0.48516	0.0447636
0.24753	0.530293	0.0450088
0.24804	0.51361	0.0450257
0.24855	0.483265	0.0448135
0.24905	0.53844	0.0447893
0.24956	0.532053	0.0442339
0.25007	0.515737	0.0443417
0.25057	0.497968	0.0436741
0.25108	0.521412	0.0438779
0.25159	0.46846	0.0447169
0.25209	0.487368	0.0437856
0.2526	0.48541	0.0442599
0.25311	0.466945	0.0441717
0.25361	0.509258	0.0437068
0.25412	0.484193	0.0439506
0.25463	0.514992	0.0438744
0.25513	0.531062	0.043797
0.25564	0.451415	0.0430093
0.25615	0.45056	0.0432242
0.25665	0.543647	0.0431216
0.25716	0.424432	0.0428422
0.25767	0.514637	0.0429703
0.25817	0.50117	0.0433378
0.25868	0.431762	0.0432279
0.25919	0.471567	0.0424414
0.25969	0.464025	0.0424539
0.2602	0.485205	0.0423347
0.26071	0.418215	0.0428434
0.26121	0.467955	0.0420351
0.26172	0.432648	0.042108
0.26223	0.455867	0.0422303
0.26273	0.468917	0.0420316
0.26324	0.472753	0.0420063
0.26375	0.412445	0.0421727
0.26425	0.477492	0.0418911
0.26476	0.48674	0.0422851
0.26527	0.508105	0.0418201
0.26577	0.469585	0.0421152
0.26628	0.471892	0.0414901
0.26679	0.478705	0.0417911
0.26729	0.48899	0.0412149
0.2678	0.446113	0.0417751
0.26831	0.46615	0.0415326
0.26881	0.42399	0.0411888
0.26932	0.439038	0.0409287
0.26983	0.50059	0.0408069
0.27033	0.518522	0.0416227
0.27084	0.43937	0.0409566
0.27134	0.441937	0.0408444
0.27185	0.452072	0.04116
0.27236	0.50051	0.0412164
0.27286	0.48295	0.041069
0.27337	0.447905	0.0409375
0.27388	0.500552	0.0404517
0.27438	0.457175	0.0405927
0.27489	0.423712	0.0405403
0.2754	0.45728	0.0403553
0.2759	0.447107	0.0404766
0.27641	0.410898	0.0402766
0.27692	0.426542	0.0406089
0.27742	0.416913	0.0402223
0.27793	0.42232	0.0403849
0.27844	0.431978	0.0407775
0.27894	0.498343	0.0402214
0.27945	0.384302	0.0400048
0.27996	0.43704	0.0403362
0.28046	0.438135	0.0399897
0.28097	0.405035	0.039703
0.28148	0.423938	0.0397042
0.28198	0.405855	0.0399202
0.28249	0.394253	0.0398235
0.283	0.39651	0.0400759
0.2835	0.428915	0.0398602
0.28401	0.428787	0.0398376
0.28452	0.441915	0.0397537
0.28502	0.39436	0.0398712
0.28553	0.410618	0.0397112
0.28604	0.361095	0.0397092
0.28654	0.393405	0.0395324
0.28705	0.411338	0.0394322
0.28756	0.3944	0.0389137
0.28806	0.407942	0.0391786
0.28857	0.464685	0.0396174
0.28908	0.38123	0.0395573
0.28958	0.404948	0.0396824
0.29009	0.436762	0.0397118
0.29059	0.426903	0.0394251
0.2911	0.424353	0.0399089
0.29161	0.403907	0.0396396
0.29211	0.438802	0.0395223
0.29262	0.401995	0.0398134
0.29313	0.363375	0.0394023
0.29363	0.423418	0.0397824
0.29414	0.354753	0.0392462
0.29465	0.409967	0.0395261
0.29515	0.389775	0.0393723
0.29566	0.421247	0.0392222
0.29617	0.367727	0.0397715
0.29667	0.36351	0.0394267
0.29718	0.4431	0.0392
0.29769	0.382955	0.039451
0.29819	0.40657	0.0395422
0.2987	0.387697	0.0393034
0.29921	0.432248	0.0394226
0.29971	0.42931	0.0396197
0.30022	0.381505	0.0389667
0.30073	0.42457	0.0393761
0.30123	0.352152	0.0390837
0.30174	0.36449	0.0395101
0.30225	0.35781	0.0390152
0.30275	0.421388	0.0392111
0.30326	0.372095	0.0394123
0.30377	0.351878	0.0389669
0.30427	0.40965	0.0389331
0.30478	0.39059	0.0387785
0.30529	0.414045	0.0392859
0.30579	0.33106	0.0389574
0.3063	0.406467	0.0383258
0.3068	0.389405	0.0390262
0.30731	0.40615	0.0388796
0.30782	0.361405	0.0384383
0.30832	0.363205	0.0399239
0.30883	0.36054	0.0394649
0.30934	0.422513	0.0394054
0.30984	0.40327	0.0393137
0.31035	0.404602	0.0393782
0.31086	0.35636	0.0395022
0.31136	0.421467	0.0395576
0.31187	0.351205	0.0403724
0.31238	0.348467	0.0405267
0.31288	0.41165	0.0406893
0.31339	0.41182	0.0405124
0.3139	0.37635	0.04056
0.3144	0.359475	0.041052
0.31491	0.376032	0.0412341
0.31542	0.339467	0.0414191
0.31592	0.38489	0.0415451
0.31643	0.38935	0.0416096
0.31694	0.423285	0.041075
0.31744	0.462753	0.0415644
0.31795	0.353523	0.0418115
0.31845	0.28793	0.0416381
0.31896	0.376128	0.0415314
0.31947	0.28687	0.0418808
0.31997	0.29147	0.0418936
0.32048	0.352448	0.041534
0.32099	0.413592	0.0428929
0.32149	0.3473	0.0421198
0.322	0.437265	0.0417067
0.32251	0.331348	0.0418852
0.32301	0.329415	0.0424645
0.32352	0.341517	0.0419403
0.32403	0.306443	0.0416219
0.32453	0.327505	0.0418788
0.32504	0.38324	0.0421951
0.32555	0.35225	0.0417504
0.32605	0.263468	0.0419768
0.32656	0.279768	0.0416864
0.32707	0.29978	0.0418635
0.32757	0.39583	0.0421226
0.32808	0.308805	0.0421334
0.32859	0.388615	0.0427602
0.32909	0.397645	0.0419137
0.3296	0.41091	0.0425094
0.3301	0.404938	0.0428408
0.33061	0.40653	0.0427734
0.33112	0.327235	0.0423157
0.33162	0.347425	0.0426655
0.33213	0.312065	0.0426164
0.33264	0.34239	0.0423127
0.33314	0.297385	0.0431503
0.33365	0.306152	0.0430556
0.33416	0.362255	0.043033
0.33466	0.26344	0.0421935
0.33517	0.30307	0.0425706
0.33568	0.326242	0.0426614
0.33618	0.399425	0.0423727
0.33669	0.410465	0.0427916
0.3372	0.317543	0.0427054
0.3377	0.30335	0.0430293
0.33821	0.301967	0.0431857
0.33872	0.324765	0.0426418
0.33922	0.32956	0.0431453
0.33973	0.367615	0.0429846
0.34023	0.361482	0.0429978
0.34074	0.380018	0.0428345
0.34125	0.37327	0.0434137
0.34175	0.366378	0.0430192
0.34226	0.323987	0.0436621
0.34277	0.244962	0.0430613
0.34327	0.342865	0.0427978
0.34378	0.352108	0.0426262
0.34429	0.275405	0.0433016
0.34479	0.310285	0.0433438
0.3453	0.347537	0.0431541
0.34581	0.324325	0.0429465
0.34631	0.266282	0.0436392
0.34682	0.292295	0.0432691
0.34733	0.40763	0.0428283
0.34783	0.311267	0.0433571
0.34834	0.21806	0.0435922
0.34884	0.336285	0.0433003
0.34935	0.356758	0.0434566
0.34986	0.231093	0.0433018
0.35036	0.360255	0.0436105
0.35087	0.290565	0.0430634
0.35138	0.319642	0.0430214
0.35188	0.298595	0.0432211
0.35239	0.27194	0.0430745
0.3529	0.331668	0.0425253
0.3534	0.258505	0.0433979
0.35391	0.293535	0.043626
0.35442	0.362762	0.0427815
0.35492	0.278662	0.0425669
0.35543	0.307922	0.0421355
0.35594	0.313638	0.0417125
0.35644	0.28565	0.04126
0.35695	0.263632	0.0411718
0.35745	0.308455	0.0410931
0.35796	0.3463	0.0407724
0.35847	0.353432	0.0408327
0.35897	0.31466	0.0413413
0.35948	0.334823	0.0410612
0.35999	0.25997	0.0414951
0.36049	0.31187	0.0416388
0.361	0.26239	0.0422477
0.36151	0.29073	0.0415067
0.36201	0.247365	0.0415867
0.36252	0.265045	0.042102
0.36303	0.27569	0.0427029
0.36353	0.335037	0.0415363
0.36404	0.34366	0.0426443
0.36455	0.266508	0.0423292
0.36505	0.24734	0.0418843
0.36556	0.292555	0.0425218
0.36606	0.296965	0.0422989
0.36657	0.316018	0.0429674
0.36708	0.28014	0.0428856
0.36758	0.307667	0.0431442
0.36809	0.305268	0.0431779
0.3686	0.329323	0.043287
0.3691	0.261585	0.0432041
0.36961	0.238817	0.0441955
0.37012	0.274085	0.0444297
0.37062	0.253063	0.0448575
0.37113	0.332527	0.0451293
0.37164	0.23223	0.0451969
0.37214	0.323415	0.045171
0.37265	0.321723	0.0444749
0.37315	0.265735	0.045024
0.37366	0.245425	0.0452441
0.37417	0.281367	0.0446008
0.37467	0.269552	0.0450318
0.37518	0.331145	0.0456388
0.37569	0.238872	0.0456095
0.37619	0.347073	0.0455454
0.3767	0.308748	0.0461683
0.37721	0.317323	0.046917
0.37771	0.383215	0.0457583
0.37822	0.367245	0.0466568
0.37873	0.233203	0.0472196
0.37923	0.281055	0.0468844
0.37974	0.263325	0.0472557
0.38024	0.30237	0.0476211
0.38075	0.236943	0.0474122
0.38126	0.273052	0.0479835
0.38176	0.278255	0.0479151
0.38227	0.188078	0.048201
0.38278	0.324155	0.0485974
0.38328	0.317325	0.0477592
0.38379	0.29628	0.0482812
0.3843	0.297803	0.0488988
0.3848	0.286778	0.0496076
0.38531	0.301787	0.0487499
0.38582	0.256975	0.0494337
0.38632	0.243425	0.0489813
0.38683	0.269273	0.0502557
0.38733	0.28501	0.0497578
0.38784	0.257685	0.0505764
0.38835	0.29477	0.050723
0.38885	0.239698	0.0500782
0.38936	0.388068	0.0516031
0.38987	0.204792	0.0507342
0.39037	0.237125	0.0513165
0.39088	0.284382	0.0512342
0.39139	0.250063	0.0516239
0.39189	0.28199	0.0522774
0.3924	0.309705	0.051762
0.3929	0.218315	0.051434
0.39341	0.167557	0.0528442
0.39392	0.177455	0.0528507
0.39442	0.2547	0.0534262
0.39493	0.272253	0.0526375
0.39544	0.2693	0.0534847
0.39594	0.278558	0.0544767
0.39645	0.276715	0.064052
0.39696	0.255447	0.0542121
0.39746	0.245732	0.0538555
0.39797	0.326902	0.0550986
0.39847	0.26059	0.0547534
0.39898	0.245737	0.0550128
0.39949	0.22307	0.0551374
0.39999	0.24122	0.0550416
0.4005	0.338353	0.0562965
0.40101	0.30859	0.0566895
0.40151	0.242872	0.0570963
0.40202	0.285957	0.0566481
0.40253	0.32482	0.0573587
0.40303	0.351542	0.0565737
0.40354	0.26525	0.0563847
0.40405	0.285988	0.0574438
0.40455	0.235868	0.0585311
0.40506	0.26305	0.0580329
0.40556	0.24603	0.0569036
0.40607	0.207215	0.0577167
0.40658	0.200192	0.0598624
0.40708	0.247278	0.0581015
0.40759	0.262132	0.0587416
0.4081	0.139483	0.0593055
0.4086	0.190527	0.0594186
0.40911	0.32719	0.0582392
0.40962	0.193628	0.0582393
0.41012	0.330388	0.0602943
0.41063	0.296677	0.0581738
0.41113	0.241728	0.0590356
0.41164	0.25553	0.0603567
0.41215	0.235212	0.0598033
0.41265	0.291492	0.059705
0.41316	0.156417	0.0603013
0.41367	0.307418	0.0616598
0.41417	0.244	0.0603589
0.41468	0.18838	0.0599233
0.41518	0.21885	0.0599672
0.41569	0.245215	0.0607324
0.4162	0.216713	0.0614416
0.4167	0.203168	0.0608691
0.41721	0.239817	0.0623693
0.41772	0.258	0.0614656
0.41822	0.22	0.0613213
0.41873	0.22989	0.0611807
0.41924	0.185405	0.0638425
0.41974	0.269873	0.0613928
0.42025	0.201345	0.0623981
0.42075	0.254458	0.0644636
0.42126	0.18787	0.0639735
0.42177	0.175748	0.0637587
0.42227	0.338265	0.0642161
0.42278	0.271923	0.0658867
0.42329	0.214227	0.0654099
0.42379	0.362167	0.0647039
0.4243	0.197555	0.0654399
0.42481	0.235978	0.0680085
0.42531	0.310318	0.063998
0.42582	0.340253	0.0665701
0.42632	0.288542	0.0677771
0.42683	0.211075	0.0674314
0.42734	0.261458	0.0680645
0.42784	0.198345	0.0688389
0.42835	0.20855	0.0708361
0.42886	0.25116	0.0694594
0.42936	0.175168	0.0696974
0.42987	0.20318	0.0706977
0.43037	0.202153	0.0697962
0.43088	0.150267	0.0713417
0.43139	0.23459	0.071075
0.43189	0.236953	0.074171
0.4324	0.188578	0.0732741
0.43291	0.17979	0.0736367
0.43341	0.296715	0.0746166
0.43392	0.27159	0.0741778
0.43443	0.209732	0.0760297
0.43493	0.19879	0.0758128
0.43544	0.25578	0.0775263
0.43594	0.204445	0.0785091
0.43645	0.222433	0.0775126
0.43696	0.222455	0.0796211
0.43746	0.260495	0.0804467
0.43797	0.2184	0.0796721
0.43848	0.22607	0.0800729
0.43898	0.305277	0.0814698
0.43949	0.29404	0.0841286
0.43999	0.065725	0.0828077

## Sheet: 100B Fit-4
#q**2_data	ln(I(q))_data	error_data	q**2_fit	ln(I(q))_fit	normalized_residual
0.00012996	3.18477	2.06405	0.000166926	3.15037	0.225151
0.000141848	3.18573	1.6565	0.000180365	3.14054	0.150986
0.000154256	3.11047	1.4675	0.000194324	3.13034	0.027191
0.000166926	3.35161	0.893795	0.000208514	3.11996	0.0699116
0.000180365	3.24382	0.684008	0.000223502	3.109	0.179085
0.000194324	3.14733	0.625011	0.000239012	3.09767	0.480385
0.000208514	3.14876	0.411891	0.000254722	3.08618	0.0650002
0.000223502	3.15732	0.269767	0.000271261	3.07409	-0.020994
0.000239012	3.19177	0.19589	0.00028832	3.06162	-0.0212214
0.000254722	3.09624	0.154801	0.00030555	3.04902	-0.122177
0.000271261	3.0715	0.123224	0.00032364	3.03579	0.205018
0.00028832	3.05948	0.100485	0.00034225	3.02219	0.410148
0.00030555	3.03888	0.0829813	0.000361	3.00848	0.0632455
0.00032364	3.04768	0.0579609	0.00038064	2.99412	-0.567283
0.00034225	3.04112	0.0461632	0.0004008	2.97938	0.130462
0.000361	3.0109	0.0383026	0.00042107	2.96456	-0.0766116
0.00038064	2.97684	0.0304656	0.000442261	2.94907	-0.539359
0.0004008	2.98298	0.0275307	0.000463972	2.9332	0.0555873
0.00042107	2.96267	0.0247778	0.000485762	2.91727	0.454353
0.000442261	2.93757	0.0213326
0.000463972	2.93432	0.02018
0.000485762	2.92622	0.0197021
0.000508503	2.89455	0.0181636
0.000531764	2.86221	0.0169392
0.000555074	2.84883	0.0160206

[truncated: 5 more sheets: 500B-4, 500B Fit-4, Dimensionless Kratkt_Rg, SASA and TFE values, Synergy Correlation values]
