# Supplementary material for: Disordered proteins interact with the chemical environment to tune their protective function during drying
Source: eLife. 2024 Nov 19;13:RP97231. doi: 10.7554/eLife.97231 (PMC11575898; doi:10.7554/eLife.97231)
Supplement: Figure 6—source data 1. [file elife-97231-fig6-data1.xlsx]

## Sheet: 6B_TFE Barplot
Protein	Cosolute	dG Folding	dG Dimerization	dG Folding Error	dG Dimerization Error
CAHS D	Trehalose	6971.16	4172.82	3.07836	651.491
CAHS D	Sucrose	3750.48	-93.1857	2.74872	300.876
CAHS D	Betaine	-118.234	-1290.46	6.27268	139.454
AtLEA3-3	Trehalose	4334.52	6948.84	4.72511	552.511
AtLEA3-3	Sucrose	3603.81	2555.45	1.23859	337.29
AavLEA	Trehalose	4569.5	5746.06	3.73426	261.221
AavLEA	Sucrose	3031.88	1195.79	1.45594	147.452
HeLEA	Trehalose	8900.08	3929.65	7.72501	1279.26
HeLEA	Sucrose	5409.54	-425.073	3.17577	774.951
AvLEA	Trehalose	10153.4	204.13	13.7027	623.31
AvLEA	Sucrose	6832.83	-1935.05	3.89112	490.446
AtLEA4-2	Trehalose	2897.71	3357.51	2.14494	133.984
AtLEA4-2	Sucrose	1736.2	691.79	2.50468	305.596
BSA	Trehalose	13406.8		4.66363
BSA	Sucrose	5177.22		6.64972

## Sheet: 6C_Betaine DSC_6
Temperature	Heat Flow (Normalized)	Sample
20.0195	-0.0136228	CB0
20.0192	-0.0136229	CB0
20.0186	-0.0136229	CB0
20.0186	-0.0136219	CB0
20.0188	-0.0136213	CB0
20.0182	-0.0136209	CB0
20.0192	-0.0136197	CB0
20.0193	-0.0136186	CB0
20.019	-0.0136175	CB0
20.0198	-0.0136166	CB0
20.0194	-0.0136162	CB0
20.0188	-0.0136162	CB0
20.0188	-0.0136165	CB0
20.0197	-0.0136174	CB0
20.0202	-0.0136184	CB0
20.0193	-0.0136196	CB0
20.0195	-0.0136209	CB0
20.0198	-0.0136221	CB0
20.0196	-0.0136229	CB0
20.0204	-0.0136232	CB0
20.0208	-0.0136232	CB0
20.0203	-0.0136232	CB0
20.0211	-0.0136228	CB0
20.0209	-0.0136219	CB0
20.0209	-0.0136212	CB0
20.0214	-0.01362	CB0
20.0225	-0.0136187	CB0
20.0235	-0.0136175	CB0
20.0245	-0.0136163	CB0
20.0248	-0.0136147	CB0
20.0249	-0.0136137	CB0
20.0249	-0.0136126	CB0
20.0256	-0.0136113	CB0
20.0269	-0.0136098	CB0
20.0272	-0.0136077	CB0
20.0283	-0.0136052	CB0
20.0289	-0.0136032	CB0
20.0301	-0.0136005	CB0
20.0308	-0.013597	CB0
20.0318	-0.0135911	CB0
20.0333	-0.0135848	CB0
20.0342	-0.0135771	CB0
20.0354	-0.0135712	CB0
20.0372	-0.0135632	CB0
20.0383	-0.0135495	CB0
20.0398	-0.0135303	CB0
20.0412	-0.0134995	CB0
20.0433	-0.0134654	CB0
20.0444	-0.0134249	CB0
20.046	-0.0133868	CB0
20.048	-0.0133616	CB0
20.0493	-0.0133454	CB0
20.0521	-0.0133323	CB0
20.0543	-0.0133242	CB0
20.0565	-0.0133175	CB0
20.0575	-0.0133068	CB0
20.06	-0.0132994	CB0
20.0618	-0.0132923	CB0
20.0651	-0.0132876	CB0
20.0665	-0.0132835	CB0
20.0691	-0.0132799	CB0
20.0724	-0.0132769	CB0
20.0755	-0.0132744	CB0
20.0784	-0.0132726	CB0
20.0806	-0.0132719	CB0
20.083	-0.0132727	CB0
20.087	-0.0132765	CB0
20.0901	-0.0132893	CB0
20.0929	-0.0133195	CB0
20.0955	-0.0133704	CB0
20.0994	-0.0134766	CB0
20.102	-0.0136261	CB0
20.1051	-0.0138608	CB0
20.1088	-0.0141233	CB0
20.1125	-0.0144253	CB0
20.1159	-0.0147576	CB0
20.1197	-0.0151623	CB0
20.1217	-0.0157249	CB0
20.1258	-0.016292	CB0
20.1296	-0.0167887	CB0
20.1328	-0.0174099	CB0
20.1374	-0.0180601	CB0
20.1417	-0.0184954	CB0
20.1451	-0.0190705	CB0
20.1492	-0.0196073	CB0
20.1543	-0.0201011	CB0
20.1568	-0.0206401	CB0
20.161	-0.021091	CB0
20.1668	-0.0216412	CB0
20.1699	-0.0221804	CB0
20.174	-0.0227606	CB0
20.1784	-0.0232963	CB0
20.1827	-0.0239665	CB0
20.1868	-0.0245424	CB0
20.1918	-0.0253845	CB0
20.1966	-0.0261195	CB0
20.2014	-0.0269307	CB0
20.2062	-0.0276877	CB0
20.2106	-0.0284373	CB0
20.2145	-0.0292107	CB0
20.2198	-0.0299526	CB0
20.2233	-0.0308763	CB0
20.2282	-0.0317123	CB0
20.233	-0.0325179	CB0
20.2374	-0.0334025	CB0
20.2423	-0.0344092	CB0
20.2475	-0.0352673	CB0
20.2526	-0.0361974	CB0
20.2566	-0.0371559	CB0
20.2627	-0.0379741	CB0
20.2682	-0.0388579	CB0
20.2721	-0.0398209	CB0
20.2772	-0.0408125	CB0
20.2818	-0.0417223	CB0
20.2863	-0.0427212	CB0
20.2921	-0.043758	CB0
20.2972	-0.0447929	CB0
20.303	-0.0458079	CB0
20.308	-0.0467895	CB0
20.3137	-0.0477835	CB0
20.3184	-0.048844	CB0
20.3236	-0.0499095	CB0
20.3301	-0.0510698	CB0
20.3341	-0.0521601	CB0
20.3392	-0.0532049	CB0
20.3439	-0.0543069	CB0
20.3492	-0.0553628	CB0
20.3554	-0.0563055	CB0
20.3601	-0.0574478	CB0
20.3645	-0.0585973	CB0
20.3704	-0.05974	CB0
20.3755	-0.0608467	CB0
20.3823	-0.06195	CB0
20.3876	-0.0632712	CB0
20.3929	-0.0644534	CB0
20.3971	-0.0656745	CB0
20.403	-0.066795	CB0
20.4089	-0.0679252	CB0
20.4137	-0.06895	CB0
20.42	-0.0700343	CB0
20.4254	-0.0711561	CB0
20.4301	-0.0721495	CB0
20.4362	-0.0731651	CB0
20.4417	-0.0742821	CB0
20.448	-0.0753969	CB0
20.4531	-0.0766406	CB0
20.4582	-0.0779123	CB0
20.4641	-0.0790081	CB0
20.4696	-0.0801227	CB0
20.4763	-0.0813155	CB0
20.4815	-0.082449	CB0
20.4872	-0.0835669	CB0
20.4929	-0.0847038	CB0
20.4974	-0.0858069	CB0
20.5034	-0.0869204	CB0
20.5096	-0.0880372	CB0
20.5151	-0.0892849	CB0
20.521	-0.0904206	CB0
20.526	-0.091533	CB0
20.5322	-0.09262	CB0
20.5378	-0.0937413	CB0
20.544	-0.0947966	CB0
20.5489	-0.0958542	CB0
20.5549	-0.0968201	CB0
20.5608	-0.0978796	CB0
20.5668	-0.0989379	CB0
20.5725	-0.0999974	CB0
20.5784	-0.101017	CB0
20.5839	-0.102001	CB0
20.5897	-0.10318	CB0
20.5952	-0.104285	CB0
20.6001	-0.105399	CB0
20.6076	-0.10659	CB0
20.6128	-0.107631	CB0
20.6189	-0.108791	CB0
20.6253	-0.109806	CB0
20.6294	-0.110858	CB0
20.637	-0.111903	CB0
20.6431	-0.112934	CB0
20.6489	-0.113949	CB0
20.6551	-0.115061	CB0
20.6596	-0.11604	CB0
20.6661	-0.117069	CB0
20.6712	-0.118064	CB0
20.6781	-0.119048	CB0
20.6842	-0.120101	CB0
20.6899	-0.12113	CB0
20.6969	-0.122046	CB0
20.7016	-0.123105	CB0
20.7081	-0.124266	CB0
20.7139	-0.125177	CB0
20.7197	-0.12617	CB0
20.7268	-0.127198	CB0
20.7333	-0.1282	CB0
20.7375	-0.129049	CB0
20.7437	-0.129868	CB0
20.7511	-0.130723	CB0
20.757	-0.131681	CB0
20.7625	-0.132546	CB0
20.7697	-0.133575	CB0
20.7743	-0.134558	CB0
20.7811	-0.135405	CB0
20.7868	-0.136374	CB0
20.7926	-0.137463	CB0
20.7997	-0.138454	CB0
20.8056	-0.13939	CB0
20.8115	-0.140282	CB0
20.8188	-0.141196	CB0
20.8242	-0.142052	CB0
20.831	-0.143051	CB0
20.8362	-0.144035	CB0
20.8426	-0.144887	CB0
20.8497	-0.145801	CB0
20.8563	-0.146555	CB0
20.8615	-0.147463	CB0
20.8687	-0.148368	CB0
20.8736	-0.149156	CB0
20.8802	-0.150036	CB0
20.8869	-0.150873	CB0
20.8935	-0.15171	CB0
20.8999	-0.152649	CB0
20.9065	-0.153517	CB0
20.913	-0.154334	CB0
20.92	-0.155171	CB0
20.9256	-0.156003	CB0
20.9312	-0.156832	CB0
20.9381	-0.15773	CB0
20.9449	-0.158549	CB0
20.9508	-0.159303	CB0
20.957	-0.160154	CB0
20.9644	-0.160924	CB0
20.9701	-0.161803	CB0
20.9768	-0.162684	CB0
20.983	-0.163601	CB0
20.9899	-0.164422	CB0
20.9964	-0.165313	CB0
21.0028	-0.166144	CB0
21.009	-0.166745	CB0
21.0157	-0.167525	CB0
21.0216	-0.168247	CB0
21.0285	-0.169114	CB0
21.0346	-0.169788	CB0
21.0415	-0.170486	CB0
21.0485	-0.171252	CB0
21.0534	-0.172159	CB0
21.0604	-0.172932	CB0
21.067	-0.173645	CB0
21.0733	-0.174398	CB0
21.0806	-0.175133	CB0
21.0867	-0.175986	CB0
21.0941	-0.176857	CB0
21.0996	-0.177781	CB0
21.1079	-0.178475	CB0
21.1143	-0.179338	CB0
21.1207	-0.180119	CB0
21.1266	-0.180907	CB0
21.1329	-0.181552	CB0
21.1404	-0.182149	CB0
21.1462	-0.182702	CB0
21.1529	-0.183272	CB0
21.1595	-0.183912	CB0
21.1674	-0.184653	CB0
21.1734	-0.185437	CB0
21.18	-0.185985	CB0
21.1859	-0.186851	CB0
21.1935	-0.187571	CB0
21.2012	-0.188376	CB0
21.207	-0.189055	CB0
21.2143	-0.189703	CB0
21.2204	-0.190462	CB0
21.2267	-0.191153	CB0
21.2336	-0.191784	CB0
21.2407	-0.192439	CB0
21.2477	-0.193113	CB0
21.2549	-0.193857	CB0
21.2599	-0.194644	CB0
21.2692	-0.195219	CB0
21.2763	-0.195847	CB0
21.2818	-0.196362	CB0
21.2889	-0.196895	CB0
21.2958	-0.197552	CB0
21.3017	-0.198245	CB0
21.3091	-0.198869	CB0
21.315	-0.199511	CB0
21.3217	-0.200104	CB0
21.329	-0.200782	CB0
21.336	-0.201592	CB0
21.3432	-0.202238	CB0
21.35	-0.203072	CB0
21.3565	-0.20365	CB0
21.3635	-0.204254	CB0
21.3718	-0.204897	CB0
21.3775	-0.205368	CB0
21.3855	-0.206006	CB0
21.3925	-0.206494	CB0
21.3982	-0.206975	CB0
21.4042	-0.207572	CB0
21.4123	-0.208175	CB0
21.4192	-0.208814	CB0
21.4253	-0.209536	CB0
21.4332	-0.210243	CB0
21.4398	-0.211045	CB0
21.447	-0.21174	CB0
21.4539	-0.212339	CB0
21.4604	-0.212849	CB0
21.4689	-0.213437	CB0
21.475	-0.213827	CB0
21.4822	-0.214325	CB0
21.4901	-0.214746	CB0
21.497	-0.215272	CB0
21.5039	-0.215826	CB0
21.51	-0.216292	CB0
21.5175	-0.216854	CB0
21.5243	-0.217366	CB0
21.5303	-0.217941	CB0
21.538	-0.218609	CB0
21.5447	-0.219156	CB0
21.552	-0.219725	CB0
21.5589	-0.220298	CB0
21.5664	-0.220861	CB0
21.5738	-0.221517	CB0
21.5809	-0.222123	CB0
21.5882	-0.22261	CB0
21.5953	-0.222976	CB0
21.6011	-0.223464	CB0
21.6089	-0.223995	CB0
21.6157	-0.224574	CB0
21.6227	-0.225057	CB0
21.6304	-0.225552	CB0
21.6385	-0.226104	CB0
21.6445	-0.226575	CB0
21.6518	-0.22717	CB0
21.6596	-0.227755	CB0
21.6665	-0.228305	CB0
21.6732	-0.228697	CB0
21.6806	-0.229188	CB0
21.6875	-0.229752	CB0
21.6937	-0.230336	CB0
21.7018	-0.230914	CB0
21.7076	-0.231446	CB0
21.716	-0.231932	CB0
21.7228	-0.232292	CB0
21.7307	-0.232682	CB0
21.7378	-0.233033	CB0
21.7452	-0.23347	CB0
21.7523	-0.233887	CB0
21.7595	-0.2343	CB0
21.7669	-0.234727	CB0
21.7746	-0.235245	CB0
21.7816	-0.235693	CB0
21.7876	-0.236164	CB0
21.7959	-0.236761	CB0
21.8025	-0.237283	CB0
21.8098	-0.237743	CB0
21.8172	-0.238187	CB0
21.8246	-0.23874	CB0
21.8317	-0.239181	CB0
21.8392	-0.239683	CB0
21.847	-0.240194	CB0
21.8539	-0.240661	CB0
21.861	-0.241036	CB0
21.8678	-0.241352	CB0
21.8746	-0.241693	CB0
21.882	-0.242098	CB0
21.8905	-0.242432	CB0
21.8972	-0.242804	CB0
21.9053	-0.243258	CB0
21.9123	-0.243595	CB0
21.9183	-0.244027	CB0
21.9261	-0.244462	CB0
21.934	-0.245022	CB0
21.942	-0.245552	CB0
21.9504	-0.246009	CB0
21.957	-0.246401	CB0
21.9638	-0.246806	CB0
21.9714	-0.247238	CB0
21.9789	-0.247453	CB0
21.9873	-0.247777	CB0
21.9936	-0.248203	CB0
22.0012	-0.248762	CB0
22.008	-0.249215	CB0
22.0153	-0.249681	CB0
22.0229	-0.250152	CB0
22.0302	-0.250488	CB0
22.0374	-0.250995	CB0
22.0452	-0.251428	CB0
22.0526	-0.251911	CB0
22.06	-0.252034	CB0
22.0676	-0.25224	CB0
22.0756	-0.252607	CB0
22.0823	-0.253195	CB0
22.0896	-0.253557	CB0
22.0971	-0.254057	CB0
22.1033	-0.254528	CB0
22.1115	-0.254828	CB0
22.1188	-0.255278	CB0
22.1266	-0.255698	CB0
22.1345	-0.256107	CB0
22.1429	-0.25641	CB0
22.1502	-0.256716	CB0
22.1576	-0.257035	CB0
22.1651	-0.257355	CB0
22.1715	-0.257675	CB0
22.1801	-0.258113	CB0
22.188	-0.258455	CB0
22.1948	-0.258795	CB0
22.2026	-0.259096	CB0
22.2088	-0.259437	CB0
22.2167	-0.259695	CB0
22.2244	-0.259965	CB0
22.2327	-0.260392	CB0
22.24	-0.260606	CB0
22.2471	-0.260923	CB0
22.2541	-0.261223	CB0
22.2613	-0.261628	CB0
22.2689	-0.262054	CB0
22.2768	-0.262451	CB0
22.2845	-0.262849	CB0
22.2924	-0.263231	CB0
22.2994	-0.263642	CB0
22.3075	-0.264038	CB0
22.3158	-0.264495	CB0
22.3232	-0.264696	CB0
22.331	-0.265041	CB0
22.3379	-0.265308	CB0
22.3447	-0.265586	CB0
22.3531	-0.265936	CB0
22.3608	-0.266169	CB0
22.3681	-0.266417	CB0
22.3758	-0.26664	CB0
22.3831	-0.266908	CB0
22.3903	-0.267235	CB0
22.3979	-0.267537	CB0
22.4057	-0.267782	CB0
22.4132	-0.268066	CB0
22.4203	-0.268446	CB0
22.4284	-0.26887	CB0
22.4353	-0.269297	CB0
22.4439	-0.269543	CB0
22.4512	-0.269726	CB0
22.4593	-0.26998	CB0
22.4665	-0.270266	CB0
22.4745	-0.270537	CB0
22.4826	-0.270714	CB0
22.4897	-0.271047	CB0
22.4974	-0.271309	CB0
22.5056	-0.271643	CB0
22.5122	-0.272006	CB0
22.5204	-0.272419	CB0
22.5277	-0.272741	CB0
22.5355	-0.272957	CB0
22.5429	-0.273241	CB0
22.5508	-0.273619	CB0
22.5582	-0.273971	CB0
22.5656	-0.274218	CB0
22.5736	-0.274431	CB0
22.5813	-0.274714	CB0
22.5893	-0.275023	CB0
22.5966	-0.275295	CB0
22.6049	-0.275682	CB0
22.6128	-0.275988	CB0
22.6205	-0.27631	CB0
22.6282	-0.276604	CB0
22.6357	-0.276932	CB0
22.6425	-0.277222	CB0
22.6506	-0.27746	CB0
22.6587	-0.27758	CB0
22.6654	-0.277849	CB0
22.6731	-0.278133	CB0
22.6811	-0.278271	CB0
22.6895	-0.278395	CB0
22.696	-0.278549	CB0
22.7042	-0.278786	CB0
22.7123	-0.278982	CB0
22.7196	-0.279228	CB0
22.7278	-0.27939	CB0
22.7349	-0.279696	CB0
22.7434	-0.279919	CB0
22.751	-0.280187	CB0
22.7585	-0.28056	CB0
22.7661	-0.280997	CB0
22.7739	-0.281364	CB0
22.7822	-0.281574	CB0
22.7903	-0.281787	CB0
22.7971	-0.282003	CB0
22.8051	-0.282232	CB0
22.8123	-0.282379	CB0
22.8207	-0.282604	CB0
22.8282	-0.282816	CB0
22.8361	-0.283089	CB0
22.8439	-0.283345	CB0
22.8529	-0.283492	CB0
22.8597	-0.283722	CB0
22.8666	-0.283845	CB0
22.8752	-0.284049	CB0
22.8827	-0.284314	CB0
22.8903	-0.284536	CB0
22.8986	-0.284758	CB0
22.9066	-0.285026	CB0
22.9146	-0.285225	CB0
22.9218	-0.285651	CB0
22.9297	-0.286053	CB0
22.9378	-0.286355	CB0
22.9454	-0.286492	CB0
22.9531	-0.286548	CB0
22.9611	-0.286792	CB0
22.9684	-0.286951	CB0
22.9769	-0.286985	CB0
22.985	-0.287106	CB0
22.9918	-0.287268	CB0
23.0001	-0.287433	CB0
23.0077	-0.287586	CB0
23.0165	-0.287912	CB0
23.023	-0.288158	CB0
23.0312	-0.288366	CB0
23.0389	-0.288719	CB0
23.0467	-0.28893	CB0
23.0536	-0.289252	CB0
23.0629	-0.289417	CB0
23.0694	-0.289708	CB0
23.0779	-0.289931	CB0
23.0872	-0.290198	CB0
23.0932	-0.290218	CB0
23.1021	-0.290503	CB0
23.1094	-0.290591	CB0
23.1177	-0.290761	CB0
23.1253	-0.291046	CB0
23.1329	-0.291322	CB0
23.1416	-0.291585	CB0
23.1495	-0.291806	CB0
23.1574	-0.292023	CB0
23.1645	-0.292198	CB0
23.1718	-0.292462	CB0
23.18	-0.292586	CB0
23.188	-0.292762	CB0
23.1966	-0.29284	CB0
23.2034	-0.292893	CB0
23.2125	-0.293015	CB0
23.2201	-0.293234	CB0
23.2278	-0.293408	CB0
23.2355	-0.293465	CB0
23.2432	-0.29349	CB0
23.2507	-0.293721	CB0
23.2586	-0.293921	CB0
23.2672	-0.294092	CB0
23.2745	-0.294369	CB0
23.2827	-0.294618	CB0
23.2904	-0.294818	CB0
23.2988	-0.295096	CB0
23.3073	-0.295298	CB0
23.3145	-0.295416	CB0
23.323	-0.295538	CB0
23.3303	-0.29573	CB0
23.3388	-0.295863	CB0
23.3463	-0.296103	CB0
23.3539	-0.296313	CB0
23.3618	-0.296439	CB0
23.3695	-0.296776	CB0
23.3775	-0.296872	CB0
23.3866	-0.297008	CB0
23.3939	-0.297089	CB0
23.4013	-0.29721	CB0
23.4087	-0.297371	CB0
23.4165	-0.29765	CB0
23.4251	-0.297785	CB0
23.4324	-0.29816	CB0
23.4404	-0.298357	CB0
23.449	-0.298476	CB0
23.4576	-0.298816	CB0
23.4657	-0.298922	CB0
23.4736	-0.298993	CB0
23.4831	-0.299	CB0
23.4906	-0.299004	CB0
23.498	-0.299051	CB0
23.5053	-0.299092	CB0
23.5138	-0.299122	CB0
23.5213	-0.299288	CB0
23.5299	-0.29947	CB0
23.537	-0.299591	CB0
23.5448	-0.299692	CB0
23.5528	-0.29999	CB0
23.561	-0.300164	CB0
23.5688	-0.300375	CB0
23.5764	-0.300618	CB0
23.585	-0.300793	CB0
23.5926	-0.300909	CB0
23.6018	-0.301	CB0
23.609	-0.30125	CB0
23.6166	-0.3015	CB0
23.6249	-0.301555	CB0
23.6329	-0.301663	CB0
23.6403	-0.301894	CB0
23.649	-0.302023	CB0
23.6573	-0.302166	CB0
23.6645	-0.302335	CB0
23.673	-0.302416	CB0
23.6802	-0.302606	CB0
23.6892	-0.302727	CB0
23.6966	-0.302924	CB0
23.7046	-0.303223	CB0
23.7124	-0.30338	CB0
23.7206	-0.303449	CB0
23.7283	-0.303595	CB0
23.7357	-0.303655	CB0
23.7442	-0.30372	CB0
23.7528	-0.303771	CB0
23.7605	-0.303886	CB0
23.768	-0.303987	CB0
23.776	-0.304078	CB0
23.7845	-0.304185	CB0
23.7927	-0.304375	CB0
23.8007	-0.304607	CB0
23.8094	-0.304848	CB0
23.817	-0.304994	CB0
23.825	-0.305134	CB0
23.8342	-0.305239	CB0
23.8407	-0.305274	CB0
23.8481	-0.30531	CB0
23.8564	-0.305408	CB0
23.8644	-0.305456	CB0
23.8729	-0.305575	CB0
23.8807	-0.305706	CB0
23.8879	-0.305865	CB0
23.8961	-0.306078	CB0
23.9055	-0.306198	CB0
23.9136	-0.306416	CB0
23.9214	-0.30667	CB0
23.9292	-0.306737	CB0
23.9375	-0.306751	CB0
23.945	-0.306796	CB0
23.9542	-0.30685	CB0
23.9622	-0.306888	CB0
23.9703	-0.306951	CB0
23.978	-0.307084	CB0
23.9851	-0.307221	CB0
23.9933	-0.307384	CB0
24.0011	-0.307509	CB0
24.0104	-0.307626	CB0
24.0179	-0.307671	CB0
24.0255	-0.307721	CB0
24.0341	-0.307813	CB0
24.0414	-0.307911	CB0
24.0503	-0.307999	CB0
24.0577	-0.308114	CB0
24.0658	-0.308267	CB0
24.0734	-0.308505	CB0
24.082	-0.308761	CB0
24.09	-0.30898	CB0
24.0986	-0.309228	CB0
24.1058	-0.309346	CB0
24.1132	-0.309472	CB0
24.122	-0.309524	CB0
24.1311	-0.30955	CB0
24.1388	-0.309588	CB0
24.1461	-0.309637	CB0
24.1559	-0.309735	CB0
24.1634	-0.309858	CB0
24.1716	-0.31008	CB0
24.1789	-0.310275	CB0
24.1878	-0.310446	CB0
24.1953	-0.310605	CB0
24.2038	-0.310712	CB0
24.2121	-0.310716	CB0
24.2196	-0.310702	CB0
24.2275	-0.310685	CB0
24.2354	-0.31065	CB0
24.2437	-0.310647	CB0
24.2516	-0.310734	CB0
24.2593	-0.310864	CB0
24.267	-0.310988	CB0
24.2766	-0.311111	CB0
24.2826	-0.311245	CB0
24.2913	-0.31135	CB0
24.2989	-0.311456	CB0
24.3077	-0.311596	CB0
24.3155	-0.311739	CB0
24.3233	-0.31182	CB0
24.3333	-0.311894	CB0
24.3407	-0.31195	CB0
24.3486	-0.312032	CB0
24.3576	-0.312115	CB0
24.366	-0.312265	CB0
24.3732	-0.312389	CB0
24.3807	-0.312499	CB0
24.3893	-0.312557	CB0
24.3978	-0.312624	CB0
24.4055	-0.312729	CB0
24.4141	-0.312835	CB0
24.4217	-0.312952	CB0
24.4304	-0.313031	CB0
24.4383	-0.313105	CB0
24.4459	-0.313122	CB0
24.4538	-0.313171	CB0
24.4621	-0.313236	CB0
24.4697	-0.313336	CB0
24.4778	-0.313451	CB0
24.4863	-0.313543	CB0
24.4947	-0.313619	CB0
24.5025	-0.313736	CB0
24.5113	-0.313897	CB0
24.5192	-0.314011	CB0
24.5288	-0.314088	CB0
24.5362	-0.314131	CB0
24.544	-0.314159	CB0
24.5533	-0.314167	CB0
24.5606	-0.314173	CB0
24.5682	-0.314229	CB0
24.5755	-0.314291	CB0
24.5842	-0.314362	CB0
24.5926	-0.314464	CB0
24.5996	-0.31464	CB0
24.6077	-0.314783	CB0
24.6168	-0.314937	CB0
24.6255	-0.315078	CB0
24.6336	-0.315179	CB0
24.6415	-0.315237	CB0
24.6494	-0.31528	CB0
24.6575	-0.315337	CB0
24.6654	-0.315378	CB0
24.6743	-0.315402	CB0
24.682	-0.315418	CB0
24.691	-0.315455	CB0
24.6989	-0.315505	CB0
24.7065	-0.315599	CB0
24.7141	-0.315721	CB0
24.7228	-0.31585	CB0
24.7311	-0.315988	CB0
24.7383	-0.316095	CB0
24.7469	-0.316156	CB0
24.7558	-0.316191	CB0
24.7627	-0.316196	CB0
24.7725	-0.316198	CB0
24.7796	-0.316211	CB0
24.7876	-0.316239	CB0
24.7964	-0.316352	CB0
24.8045	-0.316521	CB0
24.8119	-0.316789	CB0
24.8198	-0.317085	CB0
24.8278	-0.317251	CB0
24.8366	-0.317336	CB0
24.8447	-0.317411	CB0
24.853	-0.317416	CB0
24.8607	-0.317393	CB0
24.869	-0.317368	CB0
24.8772	-0.317346	CB0
24.8857	-0.317333	CB0
24.8935	-0.317338	CB0
24.9015	-0.317379	CB0
24.9103	-0.317427	CB0
24.9186	-0.317524	CB0
24.9269	-0.317655	CB0
24.9349	-0.317793	CB0
24.9434	-0.317916	CB0
24.9521	-0.317994	CB0
24.9596	-0.31805	CB0
24.9677	-0.318086	CB0
24.9762	-0.318109	CB0
24.9843	-0.318121	CB0
24.9935	-0.318117	CB0
25.0008	-0.318115	CB0
25.0086	-0.318114	CB0
25.0163	-0.31813	CB0
25.0241	-0.31815	CB0
25.033	-0.318169	CB0
25.0409	-0.318196	CB0
25.0495	-0.318264	CB0
25.0586	-0.318383	CB0
25.0656	-0.31853	CB0
25.0739	-0.318653	CB0
25.0828	-0.31875	CB0
25.0904	-0.318844	CB0
25.0989	-0.318918	CB0
25.106	-0.319003	CB0
25.1149	-0.319083	CB0
25.1229	-0.319153	CB0
25.1303	-0.31921	CB0
25.1386	-0.319257	CB0
25.1467	-0.319311	CB0
25.1553	-0.319391	CB0
25.1638	-0.319467	CB0
25.1717	-0.31954	CB0
25.1806	-0.319599	CB0
25.1884	-0.319658	CB0
25.197	-0.31971	CB0
25.2049	-0.319771	CB0
25.2133	-0.319827	CB0
25.2216	-0.31989	CB0
25.2296	-0.319925	CB0
25.238	-0.319968	CB0
25.2467	-0.320006	CB0
25.2558	-0.320061	CB0
25.2628	-0.320125	CB0
25.2707	-0.320182	CB0
25.2786	-0.320228	CB0
25.2864	-0.320271	CB0
25.2958	-0.320313	CB0
25.3037	-0.320357	CB0
25.3121	-0.320414	CB0
25.3207	-0.320455	CB0
25.3293	-0.320507	CB0
25.3376	-0.32056	CB0
25.346	-0.320627	CB0
25.353	-0.320696	CB0
25.3614	-0.320771	CB0
25.369	-0.320835	CB0
25.3775	-0.320914	CB0
25.3862	-0.320992	CB0
25.394	-0.321068	CB0
25.4025	-0.321152	CB0
25.4105	-0.3212	CB0
25.4193	-0.321236	CB0
25.4269	-0.321259	CB0
25.4355	-0.321271	CB0
25.4438	-0.32128	CB0
25.4529	-0.321287	CB0
25.4605	-0.321301	CB0
25.4692	-0.32133	CB0
25.4765	-0.321374	CB0
25.4851	-0.321424	CB0
25.4927	-0.321523	CB0
25.5011	-0.321642	CB0
25.5091	-0.321746	CB0
25.5173	-0.321813	CB0
25.526	-0.321854	CB0
25.5334	-0.321887	CB0
25.5418	-0.321926	CB0
25.5502	-0.321951	CB0
25.5585	-0.321979	CB0
25.5669	-0.322015	CB0
25.5756	-0.322048	CB0
25.5833	-0.322118	CB0
25.592	-0.322213	CB0
25.6007	-0.322325	CB0
25.6071	-0.322412	CB0
25.6161	-0.322471	CB0
25.6235	-0.322515	CB0
25.632	-0.322566	CB0
25.6404	-0.32259	CB0
25.6487	-0.322607	CB0
25.6564	-0.322636	CB0
25.6657	-0.322664	CB0
25.6739	-0.322682	CB0
25.682	-0.32271	CB0
25.6904	-0.32276	CB0
25.6986	-0.322798	CB0
25.7071	-0.322839	CB0
25.715	-0.322868	CB0
25.7228	-0.322893	CB0
25.7316	-0.322919	CB0
25.7397	-0.322943	CB0
25.7482	-0.322961	CB0
25.7562	-0.322981	CB0
25.7634	-0.323008	CB0
25.7723	-0.323044	CB0
25.7802	-0.323103	CB0
25.7886	-0.323162	CB0
25.7979	-0.32321	CB0
25.805	-0.32328	CB0
25.8139	-0.323332	CB0
25.8215	-0.323393	CB0
25.8302	-0.323453	CB0
25.8378	-0.323487	CB0
25.8463	-0.32352	CB0
25.8541	-0.323542	CB0
25.8627	-0.323563	CB0
25.8707	-0.323583	CB0
25.8804	-0.323598	CB0
25.8879	-0.323612	CB0
25.8968	-0.323634	CB0
25.9042	-0.323663	CB0
25.9129	-0.323696	CB0
25.9208	-0.323734	CB0
25.9296	-0.323766	CB0
25.9377	-0.323805	CB0
25.9456	-0.323842	CB0
25.9529	-0.323866	CB0
25.9614	-0.32388	CB0
25.9705	-0.323885	CB0
25.9787	-0.323889	CB0
25.9869	-0.323893	CB0
25.996	-0.323898	CB0
26.0039	-0.323908	CB0
26.0114	-0.323925	CB0
26.0216	-0.323966	CB0
26.0278	-0.324042	CB0
26.0365	-0.324122	CB0
26.0436	-0.324188	CB0
26.0533	-0.324241	CB0
26.0607	-0.324279	CB0
26.0692	-0.324319	CB0
26.0772	-0.324343	CB0
26.0857	-0.324372	CB0
26.0935	-0.324396	CB0
26.1021	-0.324419	CB0
26.111	-0.324437	CB0
26.1184	-0.324458	CB0
26.1274	-0.324479	CB0
26.135	-0.324498	CB0
26.1443	-0.324511	CB0
26.1523	-0.324522	CB0
26.1613	-0.324536	CB0
26.1686	-0.324555	CB0
26.1769	-0.32459	CB0
26.1845	-0.32463	CB0
26.1934	-0.324683	CB0
26.2026	-0.324736	CB0
26.2105	-0.324781	CB0
26.2186	-0.324819	CB0
26.2266	-0.324868	CB0
26.235	-0.324902	CB0
26.2425	-0.324947	CB0
26.2512	-0.324992	CB0
26.2601	-0.32503	CB0
26.2676	-0.325078	CB0
26.2761	-0.325115	CB0
26.2838	-0.325139	CB0
26.2928	-0.325163	CB0
26.3003	-0.325184	CB0
26.3101	-0.3252	CB0
26.3174	-0.325217	CB0
26.3254	-0.325227	CB0
26.333	-0.325239	CB0
26.3425	-0.325248	CB0
26.3505	-0.325258	CB0
26.3597	-0.325279	CB0
26.3676	-0.325318	CB0
26.3751	-0.325363	CB0
26.3845	-0.325409	CB0
26.3921	-0.325468	CB0
26.4003	-0.325519	CB0
26.4081	-0.325556	CB0
26.4168	-0.325576	CB0
26.4244	-0.325596	CB0
26.433	-0.325603	CB0
26.441	-0.325632	CB0
26.4495	-0.325637	CB0
26.4577	-0.325648	CB0
26.4668	-0.325664	CB0
26.4748	-0.32568	CB0
26.4824	-0.325715	CB0
26.4909	-0.325745	CB0
26.4996	-0.325776	CB0
26.5078	-0.3258	CB0
26.5163	-0.325832	CB0
26.5254	-0.325863	CB0
26.5329	-0.325897	CB0
26.5407	-0.325932	CB0
26.5489	-0.325955	CB0
26.5571	-0.325974	CB0
26.5649	-0.325998	CB0
26.5732	-0.326023	CB0
26.5822	-0.326052	CB0
26.5898	-0.326081	CB0
26.5988	-0.326108	CB0
26.6068	-0.326126	CB0
26.615	-0.326143	CB0
26.6235	-0.32616	CB0
26.6311	-0.326176	CB0
26.6397	-0.326185	CB0
26.6483	-0.326192	CB0
26.6568	-0.326197	CB0
26.6648	-0.326209	CB0
26.6737	-0.326218	CB0
26.6811	-0.326226	CB0
26.6898	-0.326233	CB0
26.6982	-0.32624	CB0
26.7065	-0.326252	CB0
26.7144	-0.326267	CB0
26.7218	-0.326299	CB0
26.7309	-0.326335	CB0
26.7401	-0.326365	CB0
26.7472	-0.326397	CB0
26.756	-0.326457	CB0
26.7649	-0.326516	CB0
26.7719	-0.326569	CB0
26.7804	-0.3266	CB0
26.7899	-0.326623	CB0
26.7961	-0.326649	CB0
26.8055	-0.32668	CB0
26.8136	-0.326706	CB0
26.8218	-0.326728	CB0
26.8301	-0.326745	CB0
26.8387	-0.326754	CB0
26.847	-0.326765	CB0
26.8557	-0.32678	CB0
26.8637	-0.326791	CB0
26.8719	-0.3268	CB0
26.8807	-0.326808	CB0
26.8879	-0.326817	CB0
26.8963	-0.32683	CB0
26.9043	-0.326845	CB0
26.9129	-0.326864	CB0
26.9209	-0.326877	CB0
26.9292	-0.326883	CB0
26.937	-0.32689	CB0
26.9462	-0.326901	CB0
26.9545	-0.326911	CB0
26.9632	-0.32692	CB0
26.9713	-0.326927	CB0
26.9796	-0.326943	CB0
26.9871	-0.326961	CB0
26.9963	-0.326977	CB0
27.004	-0.326992	CB0
27.0126	-0.327	CB0
27.0206	-0.327008	CB0
27.0293	-0.327015	CB0
27.037	-0.327029	CB0
27.0451	-0.327046	CB0
27.0532	-0.327061	CB0
27.0617	-0.327079	CB0
27.0702	-0.327104	CB0
27.078	-0.327135	CB0
27.0866	-0.327174	CB0
27.0944	-0.327204	CB0
27.1032	-0.327223	CB0
27.1115	-0.327238	CB0
27.12	-0.327246	CB0
27.1282	-0.327256	CB0
27.1369	-0.327268	CB0
27.1449	-0.327276	CB0
27.154	-0.327286	CB0
27.1624	-0.327298	CB0
27.1703	-0.327307	CB0
27.1788	-0.32732	CB0
27.1869	-0.327333	CB0
27.195	-0.32735	CB0
27.2041	-0.327359	CB0
27.2107	-0.327367	CB0
27.2198	-0.327374	CB0
27.2278	-0.327384	CB0
27.2368	-0.327391	CB0
27.2445	-0.327403	CB0
27.2524	-0.327411	CB0
27.2618	-0.327419	CB0
27.2694	-0.327439	CB0
27.2781	-0.327467	CB0
27.2865	-0.327495	CB0
27.2947	-0.327525	CB0
27.3032	-0.327545	CB0
27.3109	-0.327557	CB0
27.3199	-0.327565	CB0
27.3278	-0.327581	CB0
27.3358	-0.327589	CB0
27.3448	-0.327599	CB0
27.3521	-0.327613	CB0
27.3606	-0.327633	CB0
27.3688	-0.327657	CB0
27.3781	-0.327689	CB0
27.3858	-0.327721	CB0
27.395	-0.327767	CB0
27.4025	-0.327799	CB0
27.4109	-0.327809	CB0
27.4186	-0.32782	CB0
27.4285	-0.327838	CB0
27.4363	-0.327855	CB0
27.4447	-0.327867	CB0
27.4526	-0.327876	CB0
27.4609	-0.32789	CB0
27.4689	-0.327897	CB0
27.4775	-0.327902	CB0
27.4858	-0.327909	CB0
27.493	-0.327917	CB0
27.5013	-0.327925	CB0
27.5104	-0.327934	CB0
27.5187	-0.327943	CB0
27.5273	-0.327967	CB0
27.5359	-0.328005	CB0
27.5437	-0.328047	CB0
27.5526	-0.328065	CB0
27.5605	-0.328074	CB0
27.5681	-0.328083	CB0
27.5769	-0.328091	CB0
27.5858	-0.3281	CB0
27.5932	-0.328109	CB0
27.6023	-0.328117	CB0
27.6097	-0.328125	CB0
27.6182	-0.328134	CB0
27.6264	-0.328144	CB0
27.635	-0.328153	CB0
27.6428	-0.328161	CB0
27.6515	-0.32817	CB0
27.6603	-0.328178	CB0
27.6676	-0.328185	CB0
27.6766	-0.328193	CB0
27.6849	-0.328212	CB0
27.693	-0.328236	CB0
27.702	-0.328262	CB0
27.7092	-0.32829	CB0
27.7176	-0.328322	CB0
27.7267	-0.328347	CB0
27.7353	-0.328368	CB0
27.7434	-0.328385	CB0
27.7524	-0.328406	CB0
27.7598	-0.328417	CB0
27.7677	-0.328426	CB0
27.7771	-0.32844	CB0
27.7849	-0.328451	CB0
27.7929	-0.328458	CB0
27.8014	-0.328466	CB0
27.808	-0.328473	CB0
27.8183	-0.328479	CB0
27.8255	-0.328486	CB0
27.8347	-0.328493	CB0
27.843	-0.328504	CB0
27.8514	-0.328528	CB0
27.8595	-0.328571	CB0
27.8675	-0.32861	CB0
27.8758	-0.328638	CB0
27.8842	-0.32865	CB0
27.8927	-0.328663	CB0
27.9013	-0.328677	CB0
27.9092	-0.328689	CB0
27.9176	-0.328697	CB0
27.9256	-0.328706	CB0
27.9345	-0.328715	CB0
27.9416	-0.328725	CB0
27.9513	-0.328739	CB0
27.9594	-0.328748	CB0
27.9677	-0.328756	CB0
27.976	-0.328763	CB0
27.9845	-0.32877	CB0
27.9923	-0.328777	CB0
28.0006	-0.328784	CB0
28.0093	-0.328792	CB0
28.0179	-0.328799	CB0
28.0256	-0.328812	CB0
28.0335	-0.328836	CB0
28.0437	-0.328859	CB0
28.0511	-0.328873	CB0
28.0594	-0.328889	CB0
28.0674	-0.328898	CB0
28.0761	-0.328907	CB0
28.0847	-0.328915	CB0
28.0921	-0.328924	CB0
28.0999	-0.328931	CB0
28.109	-0.328938	CB0
28.1176	-0.328946	CB0
28.1258	-0.328953	CB0
28.1344	-0.328961	CB0
28.1422	-0.32897	CB0
28.1506	-0.328983	CB0
28.1601	-0.329001	CB0
28.1678	-0.329023	CB0
28.1755	-0.329049	CB0
28.1831	-0.329067	CB0
28.1921	-0.329076	CB0
28.2003	-0.329085	CB0
28.209	-0.329093	CB0
28.2174	-0.329099	CB0
28.2262	-0.329106	CB0
28.2341	-0.329113	CB0
28.2422	-0.32912	CB0
28.2501	-0.329128	CB0
28.2575	-0.329138	CB0
28.2669	-0.329147	CB0
28.2753	-0.329163	CB0
28.2831	-0.329174	CB0
28.2923	-0.329189	CB0
28.3004	-0.329204	CB0
28.3086	-0.32922	CB0
28.3175	-0.329232	CB0
28.326	-0.329243	CB0
28.3334	-0.329252	CB0
28.342	-0.329261	CB0
28.3502	-0.329279	CB0
28.3597	-0.329296	CB0
28.3679	-0.329309	CB0
28.3754	-0.329325	CB0
28.3838	-0.329344	CB0
28.3917	-0.329368	CB0
28.4	-0.329391	CB0
28.4086	-0.329406	CB0
28.4172	-0.329419	CB0
28.4253	-0.329426	CB0
28.4342	-0.329431	CB0
28.4417	-0.329438	CB0
28.4501	-0.329445	CB0
28.4585	-0.329451	CB0
28.4661	-0.329458	CB0
28.4748	-0.329467	CB0
28.4833	-0.329476	CB0
28.4922	-0.329487	CB0
28.5007	-0.3295	CB0
28.5087	-0.329511	CB0
28.5172	-0.32952	CB0
28.5246	-0.329528	CB0
28.5326	-0.329537	CB0
28.5408	-0.329545	CB0
28.5491	-0.329553	CB0
28.558	-0.329562	CB0
28.5672	-0.329572	CB0
28.5753	-0.329581	CB0
28.5833	-0.32959	CB0
28.5917	-0.329599	CB0
28.6004	-0.329607	CB0
28.6083	-0.329614	CB0
28.6168	-0.329622	CB0
28.6243	-0.32963	CB0
28.6338	-0.329638	CB0
28.6408	-0.329646	CB0
28.6493	-0.329654	CB0
28.6577	-0.329663	CB0
28.6659	-0.329671	CB0
28.6738	-0.32968	CB0
28.6825	-0.329689	CB0
28.6911	-0.329697	CB0
28.7	-0.329704	CB0
28.7083	-0.329712	CB0
28.7177	-0.329721	CB0
28.7255	-0.329729	CB0
28.7333	-0.329737	CB0
28.7422	-0.329746	CB0
28.7504	-0.329754	CB0
28.7585	-0.329761	CB0
28.7666	-0.329768	CB0
28.7751	-0.329775	CB0
28.784	-0.329781	CB0
28.7921	-0.329787	CB0
28.8002	-0.329792	CB0
28.8086	-0.3298	CB0
28.8168	-0.329808	CB0
28.824	-0.329817	CB0
28.8328	-0.329838	CB0
28.8414	-0.329869	CB0
28.8494	-0.329897	CB0
28.8577	-0.329939	CB0
28.8664	-0.329968	CB0
28.8746	-0.329985	CB0
28.883	-0.329994	CB0
28.8917	-0.330002	CB0
28.8997	-0.330009	CB0
28.9071	-0.330015	CB0
28.9161	-0.330021	CB0
28.9246	-0.330025	CB0
28.9325	-0.33003	CB0
28.9409	-0.330035	CB0
28.9504	-0.330041	CB0
28.9573	-0.330048	CB0
28.966	-0.330055	CB0
28.9746	-0.330062	CB0
28.9825	-0.330071	CB0
28.9909	-0.330079	CB0
28.999	-0.330087	CB0
29.0076	-0.330095	CB0
29.0163	-0.330103	CB0
29.024	-0.33011	CB0
29.032	-0.330118	CB0
29.0418	-0.330127	CB0
29.0492	-0.330135	CB0
29.057	-0.330143	CB0
29.0648	-0.33015	CB0
29.0751	-0.330157	CB0
29.0824	-0.330163	CB0
29.0908	-0.330169	CB0
29.0992	-0.330174	CB0
29.1082	-0.330178	CB0
29.1163	-0.330182	CB0
29.1242	-0.330187	CB0
29.1317	-0.330194	CB0
29.1399	-0.3302	CB0
29.1489	-0.330207	CB0
29.157	-0.330213	CB0
29.1657	-0.33022	CB0
29.1738	-0.330227	CB0
29.1821	-0.330235	CB0
29.1907	-0.330242	CB0
29.1991	-0.330248	CB0
29.2076	-0.330255	CB0
29.2152	-0.330261	CB0
29.2244	-0.330268	CB0
29.232	-0.330275	CB0
29.241	-0.330281	CB0
29.2483	-0.330288	CB0
29.2576	-0.330295	CB0
29.2658	-0.330302	CB0
29.2742	-0.330309	CB0
29.2824	-0.330317	CB0
29.2915	-0.330324	CB0
29.2983	-0.330332	CB0
29.3077	-0.330338	CB0
29.3165	-0.330344	CB0
29.3241	-0.330349	CB0
29.3322	-0.330354	CB0
29.3408	-0.330359	CB0
29.3481	-0.330365	CB0
29.3573	-0.330371	CB0
29.3659	-0.330378	CB0
29.3744	-0.330384	CB0
29.3823	-0.330392	CB0
29.3907	-0.330399	CB0
29.3987	-0.330406	CB0
29.4073	-0.330414	CB0
29.4163	-0.330422	CB0
29.424	-0.33043	CB0
29.4332	-0.330437	CB0
29.441	-0.330445	CB0
29.4484	-0.330453	CB0
29.4575	-0.330461	CB0
29.4651	-0.330468	CB0
29.4741	-0.330475	CB0
29.4822	-0.330481	CB0
29.4901	-0.330488	CB0
29.4993	-0.330494	CB0
29.5076	-0.330499	CB0
29.5149	-0.330502	CB0
29.5236	-0.330507	CB0
29.5318	-0.33051	CB0
29.5405	-0.330514	CB0
29.5497	-0.330519	CB0
29.5569	-0.330523	CB0
29.5653	-0.330528	CB0
29.5737	-0.330532	CB0
29.5826	-0.330538	CB0
29.5905	-0.330545	CB0
29.5988	-0.330552	CB0
29.6076	-0.330561	CB0
29.6153	-0.330578	CB0
29.6238	-0.330597	CB0
29.6319	-0.330617	CB0
29.6406	-0.330637	CB0
29.6483	-0.330646	CB0
29.6573	-0.330654	CB0
29.6665	-0.330661	CB0
29.6742	-0.330668	CB0
29.6821	-0.330674	CB0
29.6909	-0.33068	CB0
29.6989	-0.330686	CB0
29.7069	-0.330693	CB0
29.7155	-0.3307	CB0
29.7238	-0.330706	CB0
29.7315	-0.330713	CB0
29.7408	-0.33072	CB0
29.7493	-0.330726	CB0
29.7572	-0.330733	CB0
29.7665	-0.33074	CB0
29.7731	-0.330745	CB0
29.7824	-0.33075	CB0
29.7908	-0.330754	CB0
29.7992	-0.330757	CB0
29.8077	-0.330761	CB0
29.815	-0.330765	CB0
29.8237	-0.330769	CB0
29.8324	-0.330775	CB0
29.8406	-0.330781	CB0
29.849	-0.330787	CB0
29.8583	-0.330794	CB0
29.8656	-0.330801	CB0
29.8744	-0.330809	CB0
29.8827	-0.330815	CB0
29.8904	-0.330821	CB0
29.8997	-0.330827	CB0
29.9079	-0.330832	CB0
29.9156	-0.330839	CB0
29.9231	-0.330846	CB0
29.9321	-0.330852	CB0
29.9404	-0.330858	CB0
29.9482	-0.330862	CB0
29.9577	-0.330866	CB0
29.9652	-0.330871	CB0
29.9734	-0.330875	CB0
29.9813	-0.330878	CB0
29.9905	-0.330882	CB0
29.9985	-0.330888	CB0
30.0069	-0.330893	CB0
30.0156	-0.3309	CB0
30.023	-0.330907	CB0
30.0325	-0.330912	CB0
30.0404	-0.330918	CB0
30.0494	-0.330923	CB0
30.0577	-0.330928	CB0
30.0654	-0.330931	CB0
30.0736	-0.330934	CB0
30.0821	-0.330936	CB0
30.0905	-0.330939	CB0
30.0994	-0.330941	CB0
30.1071	-0.330943	CB0
30.1158	-0.330945	CB0
30.1234	-0.330948	CB0
30.1315	-0.330951	CB0
30.1399	-0.330955	CB0
30.148	-0.330959	CB0
30.1579	-0.330964	CB0
30.1647	-0.330969	CB0
30.1733	-0.330974	CB0
30.1827	-0.330979	CB0
30.1897	-0.330985	CB0
30.1993	-0.330989	CB0
30.2074	-0.330994	CB0
30.2161	-0.330999	CB0
30.2248	-0.331004	CB0
30.2327	-0.331011	CB0
30.2413	-0.331017	CB0
30.249	-0.331021	CB0
30.2578	-0.331024	CB0
30.266	-0.331028	CB0
30.274	-0.331032	CB0
30.2829	-0.331035	CB0
30.2906	-0.331037	CB0
30.2987	-0.33104	CB0
30.308	-0.331044	CB0
30.3162	-0.331047	CB0
30.3251	-0.331052	CB0
30.3336	-0.331058	CB0
30.3397	-0.331062	CB0
30.3495	-0.331067	CB0
30.3573	-0.331072	CB0
30.3661	-0.331077	CB0
30.3743	-0.331081	CB0
30.382	-0.331084	CB0
30.3909	-0.331088	CB0
30.3989	-0.331092	CB0
30.4067	-0.331096	CB0
30.4157	-0.331099	CB0
30.4238	-0.331102	CB0
30.4318	-0.331105	CB0
30.4403	-0.331109	CB0
30.4485	-0.331112	CB0
30.457	-0.331117	CB0
30.4654	-0.331123	CB0
30.4735	-0.33113	CB0
30.4829	-0.331141	CB0
30.4914	-0.331147	CB0
30.4998	-0.331153	CB0
30.5074	-0.331159	CB0
30.5165	-0.331165	CB0
30.5245	-0.331171	CB0
30.5321	-0.331175	CB0
30.5403	-0.331178	CB0
30.5495	-0.331181	CB0
30.5577	-0.331184	CB0
30.5659	-0.331188	CB0
30.5747	-0.331192	CB0
30.5822	-0.331195	CB0
30.5907	-0.331198	CB0
30.599	-0.331201	CB0
30.6085	-0.331204	CB0
30.6166	-0.331207	CB0
30.6243	-0.331212	CB0
30.6324	-0.331217	CB0
30.6404	-0.331221	CB0
30.6488	-0.331225	CB0
30.657	-0.33123	CB0
30.6646	-0.331236	CB0
30.6745	-0.331241	CB0
30.6829	-0.331246	CB0
30.6908	-0.331251	CB0
30.6994	-0.331255	CB0
30.7076	-0.331259	CB0
30.7166	-0.331262	CB0
30.7242	-0.331266	CB0
30.7326	-0.331269	CB0
30.7405	-0.331273	CB0
30.7491	-0.331276	CB0
30.7582	-0.33128	CB0
30.7661	-0.331283	CB0
30.774	-0.331287	CB0
30.7833	-0.331291	CB0
30.7917	-0.331296	CB0
30.8	-0.3313	CB0
30.808	-0.331304	CB0
30.8168	-0.331308	CB0
30.8244	-0.331312	CB0
30.8324	-0.331316	CB0
30.8416	-0.331321	CB0
30.8499	-0.331325	CB0
30.857	-0.331328	CB0
30.8663	-0.331331	CB0
30.8743	-0.331335	CB0
30.8824	-0.331339	CB0
30.8906	-0.331343	CB0
30.899	-0.331348	CB0
30.907	-0.331353	CB0
30.9155	-0.331358	CB0
30.9242	-0.331362	CB0
30.933	-0.331367	CB0
30.9413	-0.331371	CB0
30.9502	-0.331376	CB0
30.9578	-0.331381	CB0
30.9655	-0.331385	CB0
30.9739	-0.331389	CB0
30.9829	-0.331393	CB0
30.9912	-0.331398	CB0
30.9986	-0.331404	CB0
31.0073	-0.33141	CB0
31.0162	-0.331415	CB0
31.0246	-0.331421	CB0
31.0335	-0.331426	CB0
31.0413	-0.331431	CB0
31.0493	-0.331434	CB0
31.0576	-0.331436	CB0
31.0667	-0.331438	CB0
31.0742	-0.331439	CB0
31.0827	-0.33144	CB0
31.091	-0.331442	CB0
31.099	-0.331444	CB0
31.1069	-0.331447	CB0
31.1167	-0.331451	CB0
31.1243	-0.331455	CB0
31.1334	-0.331459	CB0
31.1422	-0.331461	CB0
31.1499	-0.331464	CB0
31.1581	-0.331466	CB0
31.1672	-0.331468	CB0
31.1745	-0.33147	CB0
31.1823	-0.331472	CB0
31.1913	-0.331475	CB0
31.1993	-0.331478	CB0
31.2078	-0.331481	CB0
31.2165	-0.331484	CB0
31.2253	-0.331487	CB0
31.233	-0.33149	CB0
31.2413	-0.331492	CB0
31.2504	-0.331493	CB0
31.2583	-0.331494	CB0
31.2665	-0.331495	CB0
31.2748	-0.331497	CB0
31.2833	-0.331499	CB0
31.2904	-0.331503	CB0
31.3001	-0.331507	CB0
31.3085	-0.331512	CB0
31.3169	-0.331523	CB0
31.3256	-0.331539	CB0
31.3335	-0.331553	CB0
31.3414	-0.331559	CB0
31.35	-0.331567	CB0
31.3576	-0.331573	CB0
31.3659	-0.331577	CB0
31.3745	-0.331581	CB0
31.3828	-0.331584	CB0
31.3913	-0.331586	CB0
31.3997	-0.331587	CB0
31.4084	-0.331588	CB0
31.4166	-0.33159	CB0
31.4259	-0.331592	CB0
31.4339	-0.331594	CB0
31.4416	-0.331596	CB0
31.4503	-0.331599	CB0
31.4583	-0.331602	CB0
31.4671	-0.331605	CB0
31.4754	-0.331609	CB0
31.4836	-0.331611	CB0
31.4922	-0.331613	CB0
31.5	-0.331613	CB0
31.5091	-0.331612	CB0
31.517	-0.331613	CB0
31.5249	-0.331616	CB0
31.534	-0.331619	CB0
31.5416	-0.331621	CB0
31.5497	-0.331624	CB0
31.5581	-0.331627	CB0
31.5663	-0.33163	CB0
31.5757	-0.331632	CB0
31.5843	-0.331634	CB0
31.592	-0.331634	CB0
31.6005	-0.331635	CB0
31.6086	-0.331636	CB0
31.6176	-0.331638	CB0
31.6261	-0.331641	CB0
31.6339	-0.331644	CB0
31.6424	-0.33165	CB0
31.6516	-0.331656	CB0
31.6596	-0.331662	CB0
31.6679	-0.331666	CB0
31.6749	-0.331669	CB0
31.6844	-0.331673	CB0
31.6927	-0.331674	CB0
31.7009	-0.331676	CB0
31.7086	-0.331676	CB0
31.7172	-0.331676	CB0
31.7247	-0.331677	CB0
31.7332	-0.331678	CB0
31.7418	-0.33168	CB0
31.7497	-0.331683	CB0
31.7574	-0.331686	CB0
31.767	-0.331689	CB0
31.7759	-0.331693	CB0
31.7837	-0.331695	CB0
31.7927	-0.331696	CB0
31.7998	-0.331699	CB0
31.8084	-0.331702	CB0
31.8173	-0.331704	CB0
31.8255	-0.331707	CB0
31.8325	-0.331709	CB0
31.8415	-0.331713	CB0
31.8499	-0.331716	CB0
31.859	-0.331719	CB0
31.8674	-0.33172	CB0
31.8765	-0.331722	CB0
31.8839	-0.331723	CB0
31.8931	-0.331723	CB0
31.8997	-0.331724	CB0
31.9086	-0.331725	CB0
31.9173	-0.331726	CB0
31.9265	-0.331727	CB0
31.934	-0.331729	CB0
31.942	-0.331732	CB0
31.9507	-0.331734	CB0
31.959	-0.331735	CB0
31.967	-0.331738	CB0
31.9755	-0.33174	CB0
31.9841	-0.331742	CB0
31.9923	-0.331745	CB0
32.0009	-0.331748	CB0
32.0083	-0.331752	CB0
32.0168	-0.331756	CB0
32.0253	-0.331759	CB0
32.0339	-0.331762	CB0
32.0425	-0.331764	CB0
32.0498	-0.331766	CB0
32.0593	-0.331767	CB0
32.0677	-0.331769	CB0
32.0749	-0.33177	CB0
32.0829	-0.331772	CB0
32.0922	-0.331773	CB0
32.1006	-0.331774	CB0
32.1088	-0.331776	CB0
32.117	-0.331778	CB0
32.1253	-0.331779	CB0
32.1333	-0.331778	CB0
32.1415	-0.331778	CB0
32.1496	-0.331778	CB0
32.1592	-0.331779	CB0
32.1671	-0.33178	CB0
32.1758	-0.331781	CB0
32.1841	-0.331783	CB0
32.1922	-0.331786	CB0
32.2007	-0.33179	CB0
32.2086	-0.331803	CB0
32.217	-0.331811	CB0
32.2256	-0.331813	CB0
32.2338	-0.331815	CB0
32.2417	-0.331816	CB0
32.2497	-0.331816	CB0
32.2581	-0.331815	CB0
32.2666	-0.331813	CB0
32.2755	-0.331806	CB0
32.2839	-0.331803	CB0
32.2915	-0.331802	CB0
32.3003	-0.331803	CB0
32.309	-0.331805	CB0
32.3177	-0.331808	CB0
32.3258	-0.331811	CB0
32.3344	-0.331814	CB0
32.3428	-0.331816	CB0
32.3507	-0.331818	CB0
32.3595	-0.331819	CB0
32.3679	-0.331819	CB0
32.3764	-0.331818	CB0
32.3844	-0.331817	CB0
32.3929	-0.331817	CB0
32.4005	-0.331818	CB0
32.4088	-0.331819	CB0
32.4176	-0.331822	CB0
32.426	-0.331825	CB0
32.4337	-0.331826	CB0
32.4424	-0.331827	CB0
32.4493	-0.331828	CB0
32.4593	-0.331828	CB0
32.4673	-0.331828	CB0
32.4764	-0.331829	CB0
32.4848	-0.331829	CB0
32.4917	-0.33183	CB0
32.5015	-0.331831	CB0
32.5095	-0.331832	CB0
32.5173	-0.331834	CB0
32.525	-0.331836	CB0
32.5345	-0.331839	CB0
32.5422	-0.331842	CB0
32.5503	-0.331845	CB0
32.5583	-0.331848	CB0
32.5683	-0.33185	CB0
32.5748	-0.331853	CB0
32.5841	-0.331856	CB0
32.5912	-0.331858	CB0
32.6016	-0.33186	CB0
32.6085	-0.331861	CB0
32.6169	-0.331862	CB0
32.6251	-0.331863	CB0
32.6328	-0.331865	CB0
32.6422	-0.331866	CB0
32.6496	-0.331866	CB0
32.6588	-0.331865	CB0
32.6681	-0.331863	CB0
32.6752	-0.331862	CB0
32.6836	-0.331861	CB0
32.6923	-0.331861	CB0
32.7012	-0.331862	CB0
32.7099	-0.331863	CB0
32.7179	-0.331864	CB0
32.7262	-0.331866	CB0
32.7343	-0.331869	CB0
32.742	-0.331871	CB0
32.7509	-0.331874	CB0
32.759	-0.331875	CB0
32.7663	-0.331876	CB0
32.7761	-0.331877	CB0
32.7842	-0.331879	CB0
32.7932	-0.33188	CB0
32.8014	-0.331881	CB0
32.8104	-0.331881	CB0
32.8185	-0.331881	CB0
32.8268	-0.331882	CB0
32.8348	-0.331883	CB0
32.843	-0.331883	CB0
32.8516	-0.331884	CB0
32.8599	-0.331885	CB0
32.8687	-0.331886	CB0
32.8762	-0.331889	CB0
32.8847	-0.33189	CB0
32.8934	-0.331892	CB0
32.9011	-0.331893	CB0
32.9089	-0.331895	CB0
32.9177	-0.331897	CB0
32.9258	-0.331897	CB0
32.9351	-0.331897	CB0
32.9433	-0.331898	CB0
32.952	-0.331899	CB0
32.9593	-0.3319	CB0
32.9675	-0.331901	CB0
32.9755	-0.331903	CB0
32.9848	-0.331904	CB0
32.9934	-0.331905	CB0
33.0021	-0.331907	CB0
33.0098	-0.331909	CB0
33.0188	-0.331911	CB0
33.0266	-0.331914	CB0
33.0352	-0.331916	CB0
33.0436	-0.331919	CB0
33.0521	-0.331922	CB0
33.0598	-0.331926	CB0
33.0684	-0.331929	CB0
33.0767	-0.331931	CB0
33.0849	-0.331933	CB0
33.0931	-0.331934	CB0
33.1013	-0.331935	CB0
33.1101	-0.331937	CB0
33.1177	-0.331939	CB0
33.126	-0.331942	CB0
33.1346	-0.331943	CB0
33.143	-0.331945	CB0
33.1519	-0.331948	CB0
33.1592	-0.331951	CB0
33.1689	-0.331953	CB0
33.1761	-0.331954	CB0
33.185	-0.331955	CB0
33.1925	-0.331955	CB0
33.2009	-0.331956	CB0
33.2096	-0.331956	CB0
33.2185	-0.331957	CB0
33.2263	-0.331958	CB0
33.2346	-0.33196	CB0
33.2431	-0.331962	CB0
33.2506	-0.331964	CB0
33.2598	-0.331967	CB0
33.2681	-0.33197	CB0
33.2762	-0.331971	CB0
33.2843	-0.331972	CB0
33.2933	-0.331972	CB0
33.3011	-0.331972	CB0
33.3099	-0.331971	CB0
33.3181	-0.33197	CB0
33.327	-0.33197	CB0
33.335	-0.331971	CB0
33.3432	-0.331972	CB0
33.3513	-0.331974	CB0
33.3602	-0.331977	CB0
33.3693	-0.331979	CB0
33.3771	-0.331981	CB0
33.3841	-0.331983	CB0
33.3934	-0.331984	CB0
33.4019	-0.331983	CB0
33.41	-0.331983	CB0
33.4179	-0.331983	CB0
33.4269	-0.331982	CB0
33.4349	-0.331983	CB0
33.4429	-0.331983	CB0
33.4519	-0.331985	CB0
33.4602	-0.331987	CB0
33.468	-0.33199	CB0
33.4764	-0.331992	CB0
33.4852	-0.331994	CB0
33.4941	-0.331995	CB0
33.5025	-0.331996	CB0
33.5099	-0.331997	CB0
33.5187	-0.331998	CB0
33.5273	-0.331999	CB0
33.535	-0.332	CB0
33.5439	-0.332001	CB0
33.552	-0.332004	CB0
33.5604	-0.332006	CB0
33.5684	-0.332007	CB0
33.5768	-0.332009	CB0
33.5851	-0.332011	CB0
33.5941	-0.332012	CB0
33.6025	-0.332012	CB0
33.6107	-0.332013	CB0
33.6186	-0.332013	CB0
33.6271	-0.332013	CB0
33.635	-0.332012	CB0
33.6431	-0.332012	CB0
33.6517	-0.332012	CB0
33.6605	-0.332012	CB0
33.668	-0.332013	CB0
33.6771	-0.332013	CB0
33.6843	-0.332015	CB0
33.6922	-0.332017	CB0
33.7009	-0.332019	CB0
33.7094	-0.332021	CB0
33.7182	-0.332022	CB0
33.7264	-0.332021	CB0
33.7355	-0.332021	CB0
33.7434	-0.332021	CB0
33.7516	-0.33202	CB0
33.7593	-0.332019	CB0
33.7678	-0.332018	CB0
33.7763	-0.332017	CB0
33.7846	-0.332017	CB0
33.7932	-0.332015	CB0
33.802	-0.332014	CB0
33.8097	-0.332012	CB0
33.8188	-0.33201	CB0
33.8272	-0.33201	CB0
33.8343	-0.33201	CB0
33.8433	-0.33201	CB0
33.8524	-0.332011	CB0
33.8603	-0.332012	CB0
33.8688	-0.332014	CB0
33.8772	-0.332015	CB0
33.8848	-0.332014	CB0
33.8936	-0.332012	CB0
33.9015	-0.332006	CB0
33.9096	-0.332002	CB0
33.9179	-0.332	CB0
33.926	-0.331996	CB0
33.9352	-0.331993	CB0
33.9434	-0.331991	CB0
33.9518	-0.33199	CB0
33.9609	-0.33199	CB0
33.9684	-0.331992	CB0
33.9772	-0.331994	CB0
33.985	-0.331995	CB0
33.9938	-0.331997	CB0
34.0023	-0.332001	CB0
34.0096	-0.332005	CB0
34.0183	-0.332008	CB0
34.0272	-0.33201	CB0
34.0353	-0.332011	CB0
34.0435	-0.332011	CB0
34.0523	-0.33201	CB0
34.0606	-0.332009	CB0
34.0689	-0.332008	CB0
34.0774	-0.332007	CB0
34.0851	-0.332007	CB0
34.0945	-0.332008	CB0
34.1015	-0.332008	CB0
34.1112	-0.33201	CB0
34.1189	-0.332012	CB0
34.1278	-0.332014	CB0
34.1365	-0.332018	CB0
34.1442	-0.332021	CB0
34.1525	-0.332022	CB0
34.1603	-0.332023	CB0
34.1688	-0.332024	CB0
34.1774	-0.332024	CB0
34.1858	-0.332024	CB0
34.1937	-0.332022	CB0
34.2021	-0.33202	CB0
34.2108	-0.332019	CB0
34.2193	-0.332019	CB0
34.228	-0.33202	CB0
34.2365	-0.332021	CB0
34.2449	-0.332022	CB0
34.253	-0.332023	CB0
34.2609	-0.332025	CB0
34.2701	-0.332026	CB0
34.2776	-0.332027	CB0
34.2868	-0.332028	CB0
34.2946	-0.332029	CB0
34.3021	-0.33203	CB0
34.3108	-0.332031	CB0
34.3195	-0.332033	CB0
34.3273	-0.332033	CB0
34.3358	-0.332034	CB0
34.3444	-0.332034	CB0
34.3521	-0.332034	CB0
34.3616	-0.332033	CB0
34.3699	-0.332032	CB0
34.3789	-0.332031	CB0
34.3869	-0.332031	CB0
34.3954	-0.332031	CB0
34.4031	-0.332032	CB0
34.412	-0.332032	CB0
34.4201	-0.332034	CB0
34.4282	-0.332036	CB0
34.4366	-0.332038	CB0
34.4448	-0.332044	CB0
34.4535	-0.332047	CB0
34.4606	-0.332049	CB0
34.4694	-0.332052	CB0
34.4784	-0.332056	CB0
34.4875	-0.332058	CB0
34.4941	-0.33206	CB0
34.5035	-0.332062	CB0
34.5112	-0.332063	CB0
34.5204	-0.332064	CB0
34.5285	-0.332066	CB0
34.5365	-0.332068	CB0
34.545	-0.33207	CB0
34.5532	-0.332071	CB0
34.5619	-0.332073	CB0
34.5702	-0.332076	CB0
34.5786	-0.332078	CB0
34.5854	-0.33208	CB0
34.5947	-0.332082	CB0
34.6023	-0.332083	CB0
34.6106	-0.332085	CB0
34.6195	-0.332087	CB0
34.6274	-0.332089	CB0
34.6355	-0.33209	CB0
34.6444	-0.332092	CB0
34.6538	-0.332093	CB0
34.6611	-0.332095	CB0
34.6696	-0.332097	CB0
34.6775	-0.332099	CB0
34.6861	-0.3321	CB0
34.695	-0.332101	CB0
34.7026	-0.332102	CB0
34.7115	-0.332103	CB0
34.7195	-0.332105	CB0
34.7278	-0.332106	CB0
34.7364	-0.332106	CB0
34.745	-0.332107	CB0
34.7528	-0.332107	CB0
34.7609	-0.332107	CB0
34.7695	-0.332108	CB0
34.7781	-0.332109	CB0
34.7864	-0.332109	CB0
34.7945	-0.33211	CB0
34.8026	-0.33211	CB0
34.8108	-0.332111	CB0
34.8196	-0.332111	CB0
34.8277	-0.332112	CB0
34.836	-0.332111	CB0
34.8441	-0.332112	CB0
34.853	-0.332112	CB0
34.8613	-0.332113	CB0
34.8704	-0.332113	CB0
34.8788	-0.332113	CB0
34.8857	-0.332114	CB0
34.8937	-0.332114	CB0
34.9033	-0.332113	CB0
34.9115	-0.332111	CB0
34.9195	-0.332109	CB0
34.9281	-0.332106	CB0
34.9367	-0.332106	CB0
34.9455	-0.332106	CB0
34.9534	-0.332106	CB0
34.9619	-0.332108	CB0
34.9697	-0.332111	CB0
34.9787	-0.332114	CB0
34.9862	-0.332117	CB0
34.9943	-0.332119	CB0
35.0031	-0.33212	CB0
35.0111	-0.33212	CB0
35.02	-0.332121	CB0
35.028	-0.332122	CB0
35.0374	-0.332122	CB0
35.0448	-0.332124	CB0
35.0523	-0.332125	CB0
35.0612	-0.332126	CB0
35.07	-0.332127	CB0
35.078	-0.332127	CB0
35.0864	-0.332126	CB0
35.0952	-0.332125	CB0
35.102	-0.332125	CB0
35.1113	-0.332125	CB0
35.1202	-0.332124	CB0
35.1276	-0.332124	CB0
35.1356	-0.332123	CB0
35.145	-0.332122	CB0
35.1536	-0.332122	CB0
35.1613	-0.332123	CB0
35.17	-0.332123	CB0
35.1779	-0.332122	CB0
35.1862	-0.332122	CB0
35.1948	-0.332123	CB0
35.203	-0.332124	CB0
35.2118	-0.332126	CB0
35.2193	-0.332127	CB0
35.2287	-0.332129	CB0
35.2367	-0.33213	CB0
35.2448	-0.33213	CB0
35.2527	-0.33213	CB0
35.2613	-0.332129	CB0
35.2694	-0.332128	CB0
35.278	-0.332127	CB0
35.2863	-0.332126	CB0
35.2953	-0.332124	CB0
35.3026	-0.332123	CB0
[truncated: 22,002 more rows]

## Sheet: Betaine points
Temperature	adjusted_heatflow
33.8524	-0.323866
33.853	-0.329942
33.8501	-0.335928
33.8564	-0.341824
33.8516	-0.347659
38.5076	-0.323861
38.5009	-0.329882
38.5069	-0.335925
38.5282	-0.341919
38.5573	-0.347737

## Sheet: 6D_CAHS D_Betaine Enthalpy_6
Sample	Trial	Tm	Enthalpy	Avg_Tm	Stdev_Tm	Avg_Enthalpy	Stdev_Enthalpy	C_Enthalpy	Avg_C_Enthalpy	Stdev_C_Enthalpy
CB0	1	35.07	0.0050766	35.3753	0.264329	0.00356827	0.00130625
CB0	2	35.5279	0.0028141
CB0	3	35.5279	0.0028141
CB1	1	34.1866	0.0029804	34.7628	0.666868	0.0031911	0.000322365	0.0020962	-0.000377167	0.00151226
CB1	2	34.6084	0.0030307					-0.0002166
CB1	3	35.4933	0.0035622					-0.0007481
CB10	1	34.4678	0.0047193	34.5113	0.198416	0.0035537	0.00101102	0.0003573	-1.45667e-05	0.000302164
CB10	2	34.3382	0.0030275					-0.0002134
CB10	3	34.7279	0.0029143					-0.0001002
CB100	1	34.6813	0.0063036	35.0098	0.636404	0.00463447	0.00148162	-0.001227	0.0010662	0.00035367
CB100	2	34.6048	0.0034748					-0.0006607
CB100	3	35.7433	0.004125					-0.0013109
CB500	1	34.2281	0.0057814	34.2289	0.000676077	0.00587173	7.8231e-05	-0.0007048	0.00230347	0.00138449
CB500	2	34.2293	0.0059169					-0.0031028
CB500	3	34.2293	0.0059169					-0.0031028

## Sheet: 6E_Betaine DSC_12
Temperature	Heat Flow (Normalized)	Sample
20.0158	-0.0132914	CB0
20.0164	-0.0132916	CB0
20.0164	-0.0132915	CB0
20.017	-0.0132919	CB0
20.0163	-0.0132923	CB0
20.0167	-0.0132921	CB0
20.0167	-0.0132917	CB0
20.017	-0.0132914	CB0
20.0169	-0.0132907	CB0
20.0171	-0.0132899	CB0
20.0174	-0.0132889	CB0
20.0172	-0.0132879	CB0
20.0172	-0.0132871	CB0
20.0166	-0.0132863	CB0
20.0173	-0.0132861	CB0
20.017	-0.013286	CB0
20.0175	-0.0132854	CB0
20.0174	-0.0132841	CB0
20.0181	-0.0132834	CB0
20.0174	-0.013283	CB0
20.018	-0.0132826	CB0
20.0182	-0.0132821	CB0
20.018	-0.0132813	CB0
20.0181	-0.0132802	CB0
20.0183	-0.013279	CB0
20.02	-0.0132778	CB0
20.0201	-0.0132769	CB0
20.0203	-0.0132755	CB0
20.0213	-0.0132737	CB0
20.022	-0.0132722	CB0
20.022	-0.0132709	CB0
20.0224	-0.0132694	CB0
20.023	-0.0132676	CB0
20.0226	-0.0132659	CB0
20.0238	-0.0132637	CB0
20.0245	-0.0132615	CB0
20.0243	-0.0132588	CB0
20.0255	-0.0132562	CB0
20.0258	-0.0132514	CB0
20.0283	-0.0132464	CB0
20.0293	-0.0132405	CB0
20.0296	-0.0132353	CB0
20.0315	-0.0132319	CB0
20.0323	-0.0132289	CB0
20.0331	-0.0132254	CB0
20.0352	-0.0132219	CB0
20.0372	-0.0132187	CB0
20.0386	-0.0132154	CB0
20.0388	-0.0132123	CB0
20.0397	-0.0132094	CB0
20.0419	-0.0132062	CB0
20.0434	-0.0132036	CB0
20.0446	-0.0132021	CB0
20.0459	-0.0132014	CB0
20.0476	-0.013202	CB0
20.0504	-0.0132034	CB0
20.0528	-0.0132065	CB0
20.0539	-0.0132169	CB0
20.0567	-0.0132356	CB0
20.058	-0.0132708	CB0
20.0605	-0.0133376	CB0
20.0624	-0.0134246	CB0
20.0649	-0.0135667	CB0
20.0677	-0.01374	CB0
20.0696	-0.0139698	CB0
20.0718	-0.0142698	CB0
20.075	-0.0146219	CB0
20.0763	-0.0150475	CB0
20.0793	-0.0154929	CB0
20.0826	-0.0159751	CB0
20.0865	-0.0165372	CB0
20.0884	-0.0171545	CB0
20.0917	-0.0177348	CB0
20.0945	-0.0182802	CB0
20.098	-0.0186941	CB0
20.1006	-0.0190676	CB0
20.1036	-0.0195454	CB0
20.1062	-0.0201054	CB0
20.1093	-0.0207188	CB0
20.114	-0.0212294	CB0
20.117	-0.021912	CB0
20.1201	-0.0226538	CB0
20.1233	-0.023285	CB0
20.1282	-0.0240213	CB0
20.1311	-0.024673	CB0
20.1346	-0.0254619	CB0
20.1378	-0.0262069	CB0
20.1409	-0.0269669	CB0
20.1457	-0.0277815	CB0
20.1483	-0.028511	CB0
20.1534	-0.0292958	CB0
20.1572	-0.0301753	CB0
20.1612	-0.0311551	CB0
20.1651	-0.0320255	CB0
20.1687	-0.032969	CB0
20.1719	-0.0338968	CB0
20.177	-0.0349527	CB0
20.1815	-0.0358424	CB0
20.1849	-0.0368057	CB0
20.1895	-0.0378811	CB0
20.1934	-0.038853	CB0
20.1973	-0.0398536	CB0
20.2007	-0.0408516	CB0
20.2057	-0.0419448	CB0
20.2103	-0.043075	CB0
20.2138	-0.0442785	CB0
20.2187	-0.0454263	CB0
20.2241	-0.0467286	CB0
20.229	-0.0478906	CB0
20.2319	-0.0489095	CB0
20.237	-0.0500834	CB0
20.2412	-0.0513081	CB0
20.2462	-0.0525082	CB0
20.2509	-0.0536196	CB0
20.2546	-0.0547803	CB0
20.2599	-0.0559688	CB0
20.2634	-0.0572346	CB0
20.2684	-0.0584655	CB0
20.2732	-0.0597906	CB0
20.278	-0.0609994	CB0
20.2824	-0.0621465	CB0
20.2868	-0.0634316	CB0
20.2912	-0.0646653	CB0
20.2973	-0.0658847	CB0
20.3022	-0.0671009	CB0
20.3069	-0.0683	CB0
20.3116	-0.0695367	CB0
20.3175	-0.070757	CB0
20.3217	-0.0720532	CB0
20.3272	-0.0734148	CB0
20.332	-0.0747771	CB0
20.3373	-0.0760248	CB0
20.3414	-0.0774706	CB0
20.3471	-0.0788676	CB0
20.3527	-0.0802123	CB0
20.3562	-0.0815367	CB0
20.3623	-0.0828056	CB0
20.3674	-0.0841238	CB0
20.3729	-0.0853124	CB0
20.3777	-0.0865021	CB0
20.3821	-0.0877501	CB0
20.3872	-0.0890054	CB0
20.3919	-0.0902476	CB0
20.3971	-0.0914776	CB0
20.4035	-0.0927486	CB0
20.4083	-0.0939169	CB0
20.4141	-0.0951941	CB0
20.4198	-0.0964384	CB0
20.4246	-0.0978081	CB0
20.4294	-0.0991162	CB0
20.4351	-0.100395	CB0
20.441	-0.101679	CB0
20.4459	-0.103047	CB0
20.4516	-0.104256	CB0
20.4569	-0.105525	CB0
20.4625	-0.106728	CB0
20.4678	-0.107896	CB0
20.4731	-0.109114	CB0
20.4775	-0.110222	CB0
20.4839	-0.111311	CB0
20.4886	-0.112426	CB0
20.4943	-0.113582	CB0
20.5005	-0.114804	CB0
20.5055	-0.116047	CB0
20.5109	-0.117245	CB0
20.516	-0.118512	CB0
20.5217	-0.119737	CB0
20.5284	-0.120976	CB0
20.5335	-0.122204	CB0
20.539	-0.123354	CB0
20.5451	-0.124479	CB0
20.5508	-0.125513	CB0
20.5567	-0.126605	CB0
20.562	-0.127791	CB0
20.5674	-0.128909	CB0
20.5728	-0.129954	CB0
20.5786	-0.131093	CB0
20.5844	-0.132282	CB0
20.5902	-0.133368	CB0
20.5957	-0.134485	CB0
20.6022	-0.135542	CB0
20.6071	-0.136586	CB0
20.6131	-0.137604	CB0
20.6181	-0.138644	CB0
20.6243	-0.139745	CB0
20.6306	-0.140971	CB0
20.637	-0.141976	CB0
20.6427	-0.143042	CB0
20.6476	-0.144166	CB0
20.6547	-0.145147	CB0
20.6599	-0.146166	CB0
20.666	-0.147259	CB0
20.6716	-0.148242	CB0
20.6764	-0.149138	CB0
20.6834	-0.150049	CB0
20.6899	-0.151085	CB0
20.6952	-0.152013	CB0
20.7016	-0.152955	CB0
20.7082	-0.154001	CB0
20.7131	-0.155025	CB0
20.7193	-0.15599	CB0
20.7251	-0.157063	CB0
20.7299	-0.158161	CB0
20.7383	-0.159117	CB0
20.7427	-0.160084	CB0
20.7486	-0.161004	CB0
20.7553	-0.162008	CB0
20.76	-0.162863	CB0
20.7671	-0.163769	CB0
20.7731	-0.164761	CB0
20.78	-0.165596	CB0
20.7853	-0.166487	CB0
20.7913	-0.167378	CB0
20.798	-0.168195	CB0
20.8042	-0.169054	CB0
20.8104	-0.170034	CB0
20.8165	-0.170853	CB0
20.8242	-0.171713	CB0
20.83	-0.172526	CB0
20.8359	-0.173524	CB0
20.8425	-0.174483	CB0
20.8477	-0.175319	CB0
20.8539	-0.176165	CB0
20.86	-0.177031	CB0
20.866	-0.177883	CB0
20.873	-0.178638	CB0
20.8789	-0.179639	CB0
20.8848	-0.180497	CB0
20.8911	-0.181406	CB0
20.8975	-0.182236	CB0
20.9038	-0.182994	CB0
20.9108	-0.183788	CB0
20.9164	-0.184662	CB0
20.9226	-0.185445	CB0
20.929	-0.186215	CB0
20.9363	-0.18706	CB0
20.942	-0.187927	CB0
20.9495	-0.18872	CB0
20.9554	-0.189571	CB0
20.9619	-0.19046	CB0
20.9682	-0.191284	CB0
20.975	-0.192028	CB0
20.9811	-0.192733	CB0
20.9868	-0.193487	CB0
20.9939	-0.194129	CB0
20.9993	-0.194746	CB0
21.0061	-0.195407	CB0
21.013	-0.196131	CB0
21.0206	-0.196833	CB0
21.0261	-0.197622	CB0
21.033	-0.198424	CB0
21.0395	-0.199282	CB0
21.0463	-0.200117	CB0
21.0521	-0.200952	CB0
21.059	-0.201802	CB0
21.0658	-0.202542	CB0
21.0717	-0.203298	CB0
21.0792	-0.203899	CB0
21.0853	-0.204575	CB0
21.0924	-0.20531	CB0
21.0988	-0.206027	CB0
21.1044	-0.206634	CB0
21.1134	-0.207391	CB0
21.1186	-0.208015	CB0
21.1258	-0.208772	CB0
21.1325	-0.209332	CB0
21.1392	-0.209983	CB0
21.1459	-0.210663	CB0
21.153	-0.211288	CB0
21.1587	-0.211976	CB0
21.1652	-0.212705	CB0
21.1714	-0.213505	CB0
21.1787	-0.2142	CB0
21.1856	-0.214784	CB0
21.1929	-0.215446	CB0
21.1998	-0.216187	CB0
21.2067	-0.216749	CB0
21.2123	-0.217353	CB0
21.2195	-0.217905	CB0
21.2268	-0.218484	CB0
21.2332	-0.219076	CB0
21.2397	-0.219864	CB0
21.2467	-0.220484	CB0
21.2532	-0.221155	CB0
21.2609	-0.22186	CB0
21.2674	-0.222546	CB0
21.2744	-0.223276	CB0
21.2809	-0.223732	CB0
21.2869	-0.224246	CB0
21.2946	-0.224805	CB0
21.3007	-0.225313	CB0
21.3078	-0.225869	CB0
21.3148	-0.226327	CB0
21.3229	-0.226779	CB0
21.3299	-0.227375	CB0
21.3372	-0.228057	CB0
21.344	-0.22864	CB0
21.3505	-0.229302	CB0
21.357	-0.229931	CB0
21.3643	-0.230574	CB0
21.3713	-0.231333	CB0
21.3772	-0.232013	CB0
21.3851	-0.232623	CB0
21.3914	-0.233143	CB0
21.3984	-0.233696	CB0
21.4056	-0.234251	CB0
21.413	-0.234729	CB0
21.4187	-0.235141	CB0
21.4267	-0.235591	CB0
21.4341	-0.236031	CB0
21.4409	-0.236587	CB0
21.4482	-0.237214	CB0
21.456	-0.237643	CB0
21.4621	-0.238155	CB0
21.4687	-0.238704	CB0
21.4757	-0.239183	CB0
21.4832	-0.239774	CB0
21.4898	-0.240293	CB0
21.4976	-0.24085	CB0
21.5042	-0.241413	CB0
21.5107	-0.241827	CB0
21.5177	-0.242332	CB0
21.5259	-0.242861	CB0
21.5339	-0.243405	CB0
21.5401	-0.243855	CB0
21.5478	-0.244403	CB0
21.5543	-0.244753	CB0
21.562	-0.245168	CB0
21.5693	-0.24567	CB0
21.5763	-0.246282	CB0
21.5826	-0.246896	CB0
21.5911	-0.247387	CB0
21.5975	-0.247844	CB0
21.6044	-0.248298	CB0
21.6117	-0.248754	CB0
21.6182	-0.249158	CB0
21.6251	-0.249612	CB0
21.6332	-0.250018	CB0
21.6402	-0.250372	CB0
21.6478	-0.250857	CB0
21.6548	-0.251363	CB0
21.6617	-0.251794	CB0
21.6695	-0.252325	CB0
21.6762	-0.252758	CB0
21.6839	-0.25316	CB0
21.6906	-0.253606	CB0
21.6979	-0.254033	CB0
21.7055	-0.254521	CB0
21.7129	-0.254955	CB0
21.7199	-0.255414	CB0
21.7272	-0.255856	CB0
21.7343	-0.256414	CB0
21.7413	-0.256798	CB0
21.7489	-0.257147	CB0
21.7561	-0.25765	CB0
21.7637	-0.257949	CB0
21.7715	-0.258247	CB0
21.778	-0.258504	CB0
21.7859	-0.258901	CB0
21.7929	-0.259279	CB0
21.8005	-0.259676	CB0
21.8073	-0.260058	CB0
21.8154	-0.260609	CB0
21.8222	-0.260952	CB0
21.8298	-0.261525	CB0
21.8373	-0.262104	CB0
21.8444	-0.262545	CB0
21.8519	-0.263016	CB0
21.8594	-0.263465	CB0
21.8662	-0.263832	CB0
21.8738	-0.264118	CB0
21.8806	-0.264333	CB0
21.8882	-0.26457	CB0
21.8964	-0.264989	CB0
21.9035	-0.265298	CB0
21.9116	-0.265825	CB0
21.9183	-0.266384	CB0
21.9264	-0.26673	CB0
21.9338	-0.267109	CB0
21.9408	-0.267556	CB0
21.9481	-0.268112	CB0
21.9554	-0.268423	CB0
21.9632	-0.268721	CB0
21.97	-0.268996	CB0
21.9778	-0.269257	CB0
21.9849	-0.269454	CB0
21.9923	-0.269771	CB0
22.0004	-0.270085	CB0
22.0072	-0.270456	CB0
22.0144	-0.270732	CB0
22.0221	-0.270993	CB0
22.0283	-0.271431	CB0
22.0373	-0.271813	CB0
22.0444	-0.272217	CB0
22.0523	-0.272728	CB0
22.059	-0.273119	CB0
22.0674	-0.273423	CB0
22.0746	-0.273643	CB0
22.0825	-0.273909	CB0
22.0908	-0.274346	CB0
22.0979	-0.2746	CB0
22.1044	-0.274827	CB0
22.1122	-0.275124	CB0
22.1202	-0.275433	CB0
22.1276	-0.275773	CB0
22.1349	-0.276155	CB0
22.1433	-0.276578	CB0
22.1503	-0.276872	CB0
22.1579	-0.27712	CB0
22.1652	-0.277381	CB0
22.1726	-0.277831	CB0
22.181	-0.278087	CB0
22.1873	-0.278231	CB0
22.1945	-0.278505	CB0
22.203	-0.278854	CB0
22.2108	-0.2792	CB0
22.2184	-0.279398	CB0
22.2265	-0.279722	CB0
22.2337	-0.280151	CB0
22.2414	-0.280504	CB0
22.2489	-0.280797	CB0
22.2564	-0.281145	CB0
22.2635	-0.281455	CB0
22.2715	-0.281695	CB0
22.2789	-0.282016	CB0
22.2869	-0.282282	CB0
22.2931	-0.282609	CB0
22.3023	-0.282775	CB0
22.3097	-0.283104	CB0
22.3179	-0.283304	CB0
22.3255	-0.283615	CB0
22.3328	-0.283816	CB0
22.3388	-0.283975	CB0
22.347	-0.28415	CB0
22.3549	-0.284483	CB0
22.3631	-0.284746	CB0
22.3703	-0.285053	CB0
22.378	-0.285343	CB0
22.3873	-0.285652	CB0
22.3935	-0.286071	CB0
22.4002	-0.286448	CB0
22.4093	-0.286846	CB0
22.4156	-0.287117	CB0
22.4248	-0.287233	CB0
22.4316	-0.287308	CB0
22.4395	-0.287499	CB0
22.4464	-0.287566	CB0
22.4551	-0.287769	CB0
22.4625	-0.288001	CB0
22.4701	-0.28823	CB0
22.478	-0.288492	CB0
22.4856	-0.288826	CB0
22.492	-0.289179	CB0
22.5006	-0.289587	CB0
22.5084	-0.28994	CB0
22.5151	-0.290302	CB0
22.5237	-0.290549	CB0
22.5315	-0.290792	CB0
22.5398	-0.291018	CB0
22.5469	-0.29126	CB0
22.5543	-0.291462	CB0
22.563	-0.291657	CB0
22.5708	-0.291719	CB0
22.5785	-0.291668	CB0
22.5862	-0.291762	CB0
22.5933	-0.291987	CB0
22.602	-0.292312	CB0
22.6097	-0.292614	CB0
22.6173	-0.292827	CB0
22.6247	-0.29303	CB0
22.6325	-0.293335	CB0
22.6407	-0.293697	CB0
22.6477	-0.293963	CB0
22.6559	-0.294134	CB0
22.6644	-0.294198	CB0
22.6719	-0.294294	CB0
22.6796	-0.294516	CB0
22.687	-0.294694	CB0
22.6944	-0.295002	CB0
22.7025	-0.295174	CB0
22.7104	-0.295358	CB0
22.7182	-0.295613	CB0
22.7262	-0.295852	CB0
22.7332	-0.296206	CB0
22.7415	-0.296512	CB0
22.7496	-0.296738	CB0
22.7568	-0.29703	CB0
22.7642	-0.297211	CB0
22.7722	-0.297271	CB0
22.7814	-0.297423	CB0
22.7875	-0.297693	CB0
22.7969	-0.297888	CB0
22.8046	-0.297932	CB0
22.812	-0.298061	CB0
22.8205	-0.298272	CB0
22.8273	-0.298597	CB0
22.8367	-0.298848	CB0
22.8437	-0.29904	CB0
22.8515	-0.299174	CB0
22.8588	-0.299245	CB0
22.8677	-0.299324	CB0
22.8761	-0.299644	CB0
22.8835	-0.300007	CB0
22.8894	-0.300157	CB0
22.8988	-0.300243	CB0
22.9069	-0.300368	CB0
22.9149	-0.300679	CB0
22.9226	-0.300877	CB0
22.9306	-0.300987	CB0
22.9384	-0.301059	CB0
22.9456	-0.301184	CB0
22.9538	-0.301249	CB0
22.9615	-0.30142	CB0
22.9689	-0.301657	CB0
22.9765	-0.30195	CB0
22.9846	-0.302208	CB0
22.9931	-0.302377	CB0
23.0003	-0.30273	CB0
23.0084	-0.302907	CB0
23.0167	-0.303083	CB0
23.0255	-0.303274	CB0
23.0331	-0.303439	CB0
23.0426	-0.303626	CB0
23.0491	-0.303751	CB0
23.0566	-0.303818	CB0
23.0648	-0.303995	CB0
23.0723	-0.304138	CB0
23.08	-0.30421	CB0
23.0884	-0.304341	CB0
23.0957	-0.304495	CB0
23.1044	-0.304567	CB0
23.112	-0.304706	CB0
23.119	-0.30485	CB0
23.1287	-0.30496	CB0
23.1352	-0.305146	CB0
23.144	-0.305282	CB0
23.1516	-0.305484	CB0
23.16	-0.305791	CB0
23.1678	-0.306031	CB0
23.176	-0.30622	CB0
23.1837	-0.306438	CB0
23.192	-0.306672	CB0
23.1995	-0.30674	CB0
23.2073	-0.306987	CB0
23.2154	-0.30718	CB0
23.2238	-0.307385	CB0
23.231	-0.307398	CB0
23.2394	-0.307436	CB0
23.2475	-0.307602	CB0
23.255	-0.307803	CB0
23.2625	-0.307979	CB0
23.2709	-0.308162	CB0
23.2787	-0.308364	CB0
23.2865	-0.308453	CB0
23.2949	-0.308559	CB0
23.3027	-0.308678	CB0
23.3105	-0.308809	CB0
23.3189	-0.308861	CB0
23.3273	-0.309021	CB0
23.3346	-0.309121	CB0
23.3426	-0.309205	CB0
23.3504	-0.309304	CB0
23.359	-0.309407	CB0
23.3669	-0.309554	CB0
23.3759	-0.30974	CB0
23.3834	-0.309932	CB0
23.391	-0.309997	CB0
23.3993	-0.310067	CB0
23.4065	-0.310077	CB0
23.4149	-0.310219	CB0
23.4225	-0.310459	CB0
23.4307	-0.310652	CB0
23.4385	-0.310826	CB0
23.4463	-0.310958	CB0
23.4548	-0.311087	CB0
23.4634	-0.31129	CB0
23.4706	-0.311482	CB0
23.4795	-0.311547	CB0
23.4864	-0.311626	CB0
23.4948	-0.311678	CB0
23.5028	-0.311818	CB0
23.5106	-0.31199	CB0
23.5186	-0.312072	CB0
23.5262	-0.312101	CB0
23.5347	-0.312181	CB0
23.5425	-0.312339	CB0
23.5509	-0.312465	CB0
23.5587	-0.312645	CB0
23.5667	-0.312848	CB0
23.5765	-0.313001	CB0
23.5828	-0.313183	CB0
23.5912	-0.313334	CB0
23.5985	-0.313417	CB0
23.6072	-0.313493	CB0
23.6147	-0.313536	CB0
23.6226	-0.313634	CB0
23.6315	-0.313724	CB0
23.6397	-0.313799	CB0
23.6476	-0.313906	CB0
23.6558	-0.314098	CB0
23.6641	-0.314252	CB0
23.6717	-0.314362	CB0
23.6807	-0.314437	CB0
23.6877	-0.31448	CB0
23.6961	-0.31456	CB0
23.7034	-0.314647	CB0
23.7123	-0.314764	CB0
23.72	-0.314884	CB0
23.7288	-0.314945	CB0
23.7374	-0.315012	CB0
23.7439	-0.315087	CB0
23.7521	-0.315164	CB0
23.7601	-0.315269	CB0
23.7684	-0.315404	CB0
23.7764	-0.315479	CB0
23.7847	-0.315666	CB0
23.7917	-0.31582	CB0
23.8007	-0.315955	CB0
23.8086	-0.316086	CB0
23.8179	-0.316163	CB0
23.8256	-0.316228	CB0
23.8329	-0.316271	CB0
23.841	-0.316365	CB0
23.8491	-0.316496	CB0
23.8575	-0.316665	CB0
23.8646	-0.316808	CB0
23.8725	-0.317012	CB0
23.8818	-0.31718	CB0
23.8902	-0.31725	CB0
23.8976	-0.31728	CB0
23.906	-0.317317	CB0
23.9141	-0.317329	CB0
23.9223	-0.317353	CB0
23.93	-0.31742	CB0
23.938	-0.317581	CB0
23.9457	-0.317707	CB0
23.9535	-0.317852	CB0
23.9631	-0.317972	CB0
23.9706	-0.318045	CB0
23.9781	-0.31813	CB0
23.9868	-0.318162	CB0
23.9951	-0.318206	CB0
24.0026	-0.318229	CB0
24.0106	-0.318263	CB0
24.0187	-0.31834	CB0
24.0276	-0.318473	CB0
24.0358	-0.318596	CB0
24.0434	-0.318697	CB0
24.0515	-0.318791	CB0
24.0598	-0.318859	CB0
24.0687	-0.318936	CB0
24.076	-0.319049	CB0
24.0843	-0.319139	CB0
24.092	-0.319149	CB0
24.0996	-0.31916	CB0
24.1076	-0.319212	CB0
24.1168	-0.319281	CB0
24.1246	-0.319343	CB0
24.1319	-0.319399	CB0
24.1409	-0.319492	CB0
24.1489	-0.319571	CB0
24.1572	-0.319649	CB0
24.165	-0.319752	CB0
24.1741	-0.31981	CB0
24.181	-0.319842	CB0
24.1898	-0.319873	CB0
24.1969	-0.319909	CB0
24.2054	-0.319971	CB0
24.2135	-0.320029	CB0
24.2224	-0.320091	CB0
24.2302	-0.320171	CB0
24.2377	-0.320276	CB0
24.2466	-0.32037	CB0
24.2544	-0.320453	CB0
24.2622	-0.320494	CB0
24.2704	-0.320557	CB0
24.279	-0.320626	CB0
24.2874	-0.320709	CB0
24.2952	-0.320794	CB0
24.3026	-0.320864	CB0
24.3118	-0.320969	CB0
24.3191	-0.3211	CB0
24.3267	-0.321218	CB0
24.3364	-0.321337	CB0
24.344	-0.321419	CB0
24.3515	-0.321489	CB0
24.3598	-0.321561	CB0
24.3679	-0.321652	CB0
24.3759	-0.321721	CB0
24.384	-0.32179	CB0
24.3914	-0.321859	CB0
24.4005	-0.321938	CB0
24.4094	-0.322002	CB0
24.4177	-0.322042	CB0
24.426	-0.322064	CB0
24.4335	-0.322086	CB0
24.4415	-0.322104	CB0
24.4494	-0.322128	CB0
24.458	-0.322159	CB0
24.4655	-0.322177	CB0
24.4747	-0.322215	CB0
24.4826	-0.32228	CB0
24.4905	-0.322357	CB0
24.4985	-0.322432	CB0
24.5069	-0.322517	CB0
24.5149	-0.322605	CB0
24.5225	-0.322692	CB0
24.531	-0.322778	CB0
24.5396	-0.322862	CB0
24.5478	-0.322941	CB0
24.5563	-0.322987	CB0
24.5647	-0.32304	CB0
24.5726	-0.323092	CB0
24.58	-0.323124	CB0
24.5884	-0.323143	CB0
24.5963	-0.323159	CB0
24.6048	-0.323194	CB0
24.613	-0.323244	CB0
24.62	-0.323328	CB0
24.6283	-0.323448	CB0
24.6362	-0.323584	CB0
24.6456	-0.323711	CB0
24.6542	-0.323817	CB0
24.6616	-0.323911	CB0
24.6702	-0.32397	CB0
24.6779	-0.324008	CB0
24.6869	-0.324019	CB0
24.6957	-0.324028	CB0
24.7029	-0.32404	CB0
24.7114	-0.324066	CB0
24.719	-0.324106	CB0
24.7263	-0.324167	CB0
24.7356	-0.324211	CB0
24.7438	-0.324276	CB0
24.7521	-0.324355	CB0
24.7596	-0.324422	CB0
24.7681	-0.324511	CB0
24.7768	-0.324574	CB0
24.7853	-0.324657	CB0
24.7927	-0.324737	CB0
24.8013	-0.324831	CB0
24.8096	-0.324906	CB0
24.8176	-0.324957	CB0
24.8257	-0.32501	CB0
24.8339	-0.325072	CB0
24.8426	-0.325126	CB0
24.8504	-0.325153	CB0
24.8589	-0.325163	CB0
24.8667	-0.325163	CB0
24.8747	-0.325178	CB0
24.8836	-0.325218	CB0
24.8918	-0.325272	CB0
24.9001	-0.325334	CB0
24.9076	-0.325414	CB0
24.916	-0.32553	CB0
24.9237	-0.325695	CB0
24.9335	-0.325835	CB0
24.941	-0.325931	CB0
24.9484	-0.325963	CB0
24.9574	-0.325962	CB0
24.966	-0.32596	CB0
24.9749	-0.325961	CB0
24.9822	-0.325968	CB0
24.9907	-0.325981	CB0
24.9989	-0.326001	CB0
25.0063	-0.326039	CB0
25.0145	-0.326103	CB0
25.0228	-0.326185	CB0
25.0308	-0.32629	CB0
25.0391	-0.326379	CB0
25.0477	-0.326414	CB0
25.0556	-0.32645	CB0
25.0639	-0.326476	CB0
25.0719	-0.3265	CB0
25.0806	-0.326517	CB0
25.0886	-0.326535	CB0
25.097	-0.326552	CB0
25.1049	-0.326569	CB0
25.1136	-0.326593	CB0
25.1215	-0.326623	CB0
25.1298	-0.326675	CB0
25.138	-0.32674	CB0
25.1464	-0.326814	CB0
25.1544	-0.326878	CB0
25.1628	-0.326958	CB0
25.1712	-0.327043	CB0
25.1787	-0.327118	CB0
25.1877	-0.32717	CB0
25.1958	-0.327217	CB0
25.2042	-0.327263	CB0
25.2122	-0.327296	CB0
25.2213	-0.32733	CB0
25.2287	-0.327361	CB0
25.2367	-0.327396	CB0
25.2451	-0.327422	CB0
25.2534	-0.32744	CB0
25.262	-0.327463	CB0
25.2697	-0.327488	CB0
25.2785	-0.327512	CB0
25.2867	-0.32753	CB0
25.2955	-0.327547	CB0
25.3027	-0.327568	CB0
25.311	-0.327591	CB0
25.32	-0.32761	CB0
25.327	-0.327646	CB0
25.3354	-0.327681	CB0
25.3445	-0.327732	CB0
25.3514	-0.327777	CB0
25.3603	-0.327834	CB0
25.3683	-0.327914	CB0
25.3768	-0.327967	CB0
25.385	-0.328	CB0
25.3936	-0.32803	CB0
25.4021	-0.32806	CB0
25.4098	-0.328087	CB0
25.4179	-0.328113	CB0
25.4262	-0.328133	CB0
25.4341	-0.328158	CB0
25.4428	-0.328175	CB0
25.4508	-0.328191	CB0
25.4599	-0.328219	CB0
25.4666	-0.32825	CB0
25.4754	-0.328279	CB0
25.4837	-0.328314	CB0
25.4922	-0.328351	CB0
25.5003	-0.328385	CB0
25.5084	-0.328413	CB0
25.5174	-0.328431	CB0
25.5252	-0.32845	CB0
25.5344	-0.328478	CB0
25.542	-0.328517	CB0
25.5504	-0.32855	CB0
25.5595	-0.328596	CB0
25.5673	-0.328653	CB0
25.5758	-0.32873	CB0
25.5827	-0.328807	CB0
25.5916	-0.328867	CB0
25.5999	-0.328925	CB0
25.6082	-0.328969	CB0
25.6155	-0.328991	CB0
25.6247	-0.32901	CB0
25.6332	-0.329026	CB0
25.6417	-0.329045	CB0
25.6502	-0.329063	CB0
25.6586	-0.329078	CB0
25.6667	-0.329093	CB0
25.6741	-0.329104	CB0
25.6822	-0.329119	CB0
25.6916	-0.329135	CB0
25.6993	-0.329148	CB0
25.7075	-0.329159	CB0
25.7162	-0.329171	CB0
25.7233	-0.329188	CB0
25.7315	-0.329216	CB0
25.7397	-0.329243	CB0
25.7479	-0.329266	CB0
25.7559	-0.329305	CB0
25.764	-0.329335	CB0
25.7736	-0.329369	CB0
25.7821	-0.329411	CB0
25.7899	-0.329452	CB0
25.7984	-0.329492	CB0
25.8051	-0.329532	CB0
25.8144	-0.329559	CB0
25.8225	-0.329575	CB0
25.8313	-0.329585	CB0
25.8395	-0.329591	CB0
25.8482	-0.329603	CB0
25.8559	-0.329614	CB0
25.864	-0.329625	CB0
25.8728	-0.329643	CB0
25.8809	-0.329686	CB0
25.8892	-0.32973	CB0
25.8972	-0.329775	CB0
25.9065	-0.329805	CB0
25.9141	-0.329822	CB0
25.922	-0.32985	CB0
25.9305	-0.329867	CB0
25.938	-0.329883	CB0
25.946	-0.329889	CB0
25.955	-0.329893	CB0
25.9637	-0.329899	CB0
25.9719	-0.329916	CB0
25.9804	-0.329934	CB0
25.988	-0.32995	CB0
25.9965	-0.329965	CB0
26.0049	-0.329981	CB0
26.0122	-0.330008	CB0
26.021	-0.330023	CB0
26.0294	-0.330043	CB0
26.0378	-0.330066	CB0
26.0451	-0.330088	CB0
26.0543	-0.330106	CB0
26.0628	-0.330128	CB0
26.0713	-0.33016	CB0
26.0801	-0.330184	CB0
26.0877	-0.330195	CB0
26.0955	-0.330205	CB0
26.1038	-0.33021	CB0
26.1117	-0.330215	CB0
26.1202	-0.330221	CB0
26.1288	-0.330231	CB0
26.1366	-0.330242	CB0
26.1456	-0.330266	CB0
26.154	-0.330301	CB0
26.1626	-0.330331	CB0
26.1708	-0.330365	CB0
26.179	-0.330394	CB0
26.1862	-0.330412	CB0
26.1953	-0.330429	CB0
26.203	-0.330441	CB0
26.2119	-0.330451	CB0
26.2203	-0.33046	CB0
26.2285	-0.330467	CB0
26.2363	-0.330481	CB0
26.2447	-0.330495	CB0
26.2518	-0.330507	CB0
26.2601	-0.330515	CB0
26.2696	-0.330523	CB0
26.2775	-0.330532	CB0
26.2868	-0.330543	CB0
26.2949	-0.330549	CB0
26.3035	-0.330556	CB0
26.3104	-0.330562	CB0
26.3199	-0.330568	CB0
26.3281	-0.330577	CB0
26.3362	-0.330598	CB0
26.3443	-0.330623	CB0
26.353	-0.330649	CB0
26.3609	-0.330677	CB0
26.3691	-0.33071	CB0
26.3773	-0.330741	CB0
26.3865	-0.330775	CB0
26.395	-0.330813	CB0
26.4022	-0.330846	CB0
26.411	-0.330863	CB0
26.4196	-0.33088	CB0
26.4272	-0.330901	CB0
26.4371	-0.330922	CB0
26.4444	-0.330934	CB0
26.4526	-0.330946	CB0
26.4606	-0.330959	CB0
26.4679	-0.330969	CB0
26.4773	-0.330984	CB0
26.4857	-0.330992	CB0
26.4939	-0.331004	CB0
26.5014	-0.331012	CB0
26.5103	-0.331021	CB0
26.5186	-0.331031	CB0
26.5264	-0.33105	CB0
26.5357	-0.331068	CB0
26.5437	-0.331091	CB0
26.552	-0.331111	CB0
26.5602	-0.331133	CB0
26.5684	-0.331154	CB0
26.577	-0.331166	CB0
26.5843	-0.331186	CB0
26.5928	-0.331212	CB0
26.6008	-0.331228	CB0
26.6089	-0.331244	CB0
26.6175	-0.33126	CB0
26.6264	-0.331268	CB0
26.6348	-0.331276	CB0
26.6437	-0.331284	CB0
26.6512	-0.331293	CB0
26.6598	-0.331301	CB0
26.6679	-0.331313	CB0
26.6758	-0.331319	CB0
26.6835	-0.331327	CB0
26.6926	-0.331338	CB0
26.7009	-0.331344	CB0
26.7092	-0.331351	CB0
26.7177	-0.331359	CB0
26.725	-0.331366	CB0
26.7341	-0.331383	CB0
26.7432	-0.331405	CB0
26.75	-0.331429	CB0
26.7589	-0.331446	CB0
26.7657	-0.331465	CB0
26.7746	-0.331488	CB0
26.7838	-0.331501	CB0
26.7919	-0.331508	CB0
26.8006	-0.331514	CB0
26.8093	-0.331521	CB0
26.8171	-0.331528	CB0
26.825	-0.331535	CB0
26.8328	-0.331543	CB0
26.8419	-0.331551	CB0
26.8503	-0.331558	CB0
26.8581	-0.331566	CB0
26.8665	-0.331579	CB0
26.8745	-0.331607	CB0
26.8828	-0.331647	CB0
26.8918	-0.331687	CB0
26.8995	-0.331747	CB0
26.9089	-0.33179	CB0
26.9174	-0.331818	CB0
26.9251	-0.331838	CB0
26.9323	-0.331854	CB0
26.9422	-0.33186	CB0
26.9505	-0.331866	CB0
26.9588	-0.331872	CB0
26.9668	-0.331878	CB0
26.9742	-0.331885	CB0
26.9833	-0.331891	CB0
26.9921	-0.331898	CB0
27.0002	-0.331905	CB0
27.0095	-0.331913	CB0
27.0166	-0.331919	CB0
27.025	-0.331926	CB0
27.0331	-0.331932	CB0
27.0422	-0.331939	CB0
27.0504	-0.331947	CB0
27.0575	-0.331956	CB0
27.0661	-0.331966	CB0
27.0736	-0.331982	CB0
27.0829	-0.332017	CB0
27.0906	-0.332047	CB0
27.0991	-0.332088	CB0
27.1067	-0.332119	CB0
27.1162	-0.332145	CB0
27.1246	-0.332159	CB0
27.1326	-0.332173	CB0
27.1418	-0.33218	CB0
27.149	-0.332189	CB0
27.1574	-0.332195	CB0
27.1665	-0.332201	CB0
27.1748	-0.332211	CB0
27.1829	-0.332217	CB0
27.1907	-0.332224	CB0
27.1985	-0.332232	CB0
27.2071	-0.332241	CB0
27.2159	-0.33225	CB0
27.2237	-0.332258	CB0
27.2329	-0.332265	CB0
27.24	-0.332272	CB0
27.2491	-0.33228	CB0
27.2576	-0.332287	CB0
27.2657	-0.332295	CB0
27.2738	-0.332303	CB0
27.2826	-0.332311	CB0
27.2903	-0.332318	CB0
27.2984	-0.332327	CB0
27.3078	-0.332335	CB0
27.316	-0.332342	CB0
27.3234	-0.332349	CB0
27.3314	-0.332357	CB0
27.3402	-0.332367	CB0
27.3492	-0.332387	CB0
27.3564	-0.332407	CB0
27.3653	-0.332425	CB0
27.3742	-0.332433	CB0
27.3821	-0.332442	CB0
27.3908	-0.332451	CB0
27.399	-0.332458	CB0
27.4075	-0.332464	CB0
27.4153	-0.33247	CB0
27.4249	-0.332478	CB0
27.4327	-0.332484	CB0
27.4401	-0.332492	CB0
27.4487	-0.3325	CB0
27.4573	-0.332508	CB0
27.4656	-0.332517	CB0
27.473	-0.332527	CB0
27.4827	-0.332544	CB0
27.4895	-0.332554	CB0
27.4992	-0.332565	CB0
27.5061	-0.332577	CB0
27.5149	-0.332587	CB0
27.523	-0.332598	CB0
27.5314	-0.332608	CB0
27.5391	-0.332621	CB0
27.5475	-0.33263	CB0
27.5572	-0.332638	CB0
27.5659	-0.332646	CB0
27.5739	-0.332654	CB0
27.583	-0.332663	CB0
27.5905	-0.332676	CB0
27.5988	-0.332685	CB0
27.6081	-0.332695	CB0
27.6157	-0.332707	CB0
27.6243	-0.332715	CB0
27.632	-0.332724	CB0
27.6397	-0.332733	CB0
27.6482	-0.33274	CB0
27.6565	-0.332748	CB0
27.6653	-0.332756	CB0
27.6737	-0.332766	CB0
27.6811	-0.332778	CB0
27.6894	-0.332788	CB0
27.6984	-0.332803	CB0
27.7064	-0.332823	CB0
27.7146	-0.332834	CB0
27.7233	-0.332843	CB0
27.7312	-0.332852	CB0
27.7396	-0.33286	CB0
27.7485	-0.332868	CB0
27.7569	-0.332875	CB0
27.7651	-0.332884	CB0
27.7727	-0.332895	CB0
27.7809	-0.33291	CB0
27.7899	-0.332926	CB0
27.7974	-0.33294	CB0
27.8072	-0.332961	CB0
27.8151	-0.332976	CB0
27.8239	-0.332985	CB0
27.8311	-0.332994	CB0
27.8407	-0.333002	CB0
27.849	-0.333009	CB0
27.8569	-0.333016	CB0
27.8656	-0.333022	CB0
27.873	-0.333029	CB0
27.8812	-0.333036	CB0
27.8897	-0.333042	CB0
27.8979	-0.33305	CB0
27.9069	-0.333058	CB0
27.9147	-0.333065	CB0
27.9232	-0.333074	CB0
27.9307	-0.333083	CB0
27.9395	-0.333092	CB0
27.9475	-0.333104	CB0
27.9563	-0.33312	CB0
27.9637	-0.333141	CB0
27.9731	-0.33315	CB0
27.9801	-0.333159	CB0
27.9892	-0.333167	CB0
27.9978	-0.333174	CB0
28.0055	-0.333182	CB0
28.0145	-0.333189	CB0
28.0227	-0.333195	CB0
28.032	-0.333201	CB0
28.0395	-0.333208	CB0
28.048	-0.333215	CB0
28.0567	-0.333223	CB0
28.0651	-0.33323	CB0
28.0731	-0.333239	CB0
28.0821	-0.333247	CB0
28.0906	-0.333256	CB0
28.0986	-0.333274	CB0
28.1069	-0.3333	CB0
28.1142	-0.333323	CB0
28.1226	-0.33335	CB0
28.1315	-0.333385	CB0
28.1396	-0.333399	CB0
28.1478	-0.333408	CB0
28.157	-0.333415	CB0
28.1644	-0.333421	CB0
28.1723	-0.333427	CB0
28.1818	-0.333432	CB0
28.1894	-0.333437	CB0
28.198	-0.333442	CB0
28.2065	-0.333448	CB0
28.2151	-0.333455	CB0
28.223	-0.333463	CB0
28.232	-0.333473	CB0
28.2394	-0.333493	CB0
28.2479	-0.333515	CB0
28.255	-0.333523	CB0
28.2645	-0.333532	CB0
28.272	-0.333539	CB0
28.2813	-0.333547	CB0
28.2898	-0.333554	CB0
28.2986	-0.333562	CB0
28.3054	-0.333571	CB0
28.3141	-0.333578	CB0
28.3229	-0.333587	CB0
28.3315	-0.333595	CB0
28.3393	-0.333603	CB0
28.3477	-0.333611	CB0
28.3564	-0.333618	CB0
28.365	-0.333625	CB0
28.3727	-0.333631	CB0
28.3814	-0.333638	CB0
28.3896	-0.333645	CB0
28.3978	-0.333652	CB0
28.4065	-0.333659	CB0
28.4144	-0.333666	CB0
28.4231	-0.333672	CB0
28.4313	-0.333679	CB0
28.4402	-0.333686	CB0
28.4476	-0.333693	CB0
28.4559	-0.3337	CB0
28.4648	-0.333705	CB0
28.4734	-0.333711	CB0
28.4823	-0.333718	CB0
28.4893	-0.333725	CB0
28.4971	-0.333733	CB0
28.5054	-0.33374	CB0
28.5143	-0.333748	CB0
28.5219	-0.333756	CB0
28.531	-0.333767	CB0
28.5391	-0.333775	CB0
28.547	-0.333782	CB0
28.5569	-0.333789	CB0
28.5644	-0.333794	CB0
28.5734	-0.333799	CB0
28.5815	-0.333803	CB0
28.5894	-0.333807	CB0
28.5979	-0.333811	CB0
28.6067	-0.333815	CB0
28.6131	-0.333819	CB0
28.6223	-0.333823	CB0
28.6305	-0.333829	CB0
28.6396	-0.333835	CB0
28.647	-0.333842	CB0
28.6564	-0.333859	CB0
28.6643	-0.333876	CB0
28.6729	-0.333889	CB0
28.6806	-0.333906	CB0
28.6903	-0.333934	CB0
28.6973	-0.333961	CB0
28.7069	-0.333977	CB0
28.714	-0.333985	CB0
28.7237	-0.333992	CB0
28.7317	-0.333998	CB0
28.7394	-0.334003	CB0
28.7473	-0.334009	CB0
28.7562	-0.334014	CB0
28.7635	-0.334018	CB0
28.7721	-0.334021	CB0
28.7816	-0.334024	CB0
28.7892	-0.334028	CB0
28.7979	-0.334032	CB0
28.8062	-0.334036	CB0
28.8142	-0.334041	CB0
28.8219	-0.334046	CB0
28.8308	-0.334053	CB0
28.84	-0.33406	CB0
28.8478	-0.334069	CB0
28.8557	-0.334076	CB0
28.8641	-0.334082	CB0
28.8719	-0.334087	CB0
28.8809	-0.334093	CB0
28.8897	-0.334098	CB0
28.8977	-0.334103	CB0
28.9051	-0.334108	CB0
28.9154	-0.334113	CB0
28.9234	-0.334117	CB0
28.9315	-0.334121	CB0
28.9394	-0.334126	CB0
28.9476	-0.33413	CB0
28.9565	-0.334135	CB0
28.9633	-0.33414	CB0
28.972	-0.334145	CB0
28.9798	-0.334151	CB0
28.9888	-0.334157	CB0
28.9977	-0.334164	CB0
29.0053	-0.334171	CB0
29.0143	-0.334177	CB0
29.0223	-0.334183	CB0
29.0302	-0.334189	CB0
29.0397	-0.334195	CB0
29.0478	-0.3342	CB0
29.056	-0.334205	CB0
29.0644	-0.334211	CB0
29.0734	-0.334216	CB0
29.0808	-0.334221	CB0
29.0897	-0.334226	CB0
29.0972	-0.334232	CB0
29.1065	-0.334238	CB0
29.1154	-0.334242	CB0
29.1229	-0.334247	CB0
29.1314	-0.334252	CB0
29.1405	-0.334256	CB0
29.1483	-0.334261	CB0
29.1559	-0.334267	CB0
29.1646	-0.334274	CB0
29.1727	-0.334281	CB0
29.1803	-0.33429	CB0
29.1886	-0.334298	CB0
29.1974	-0.334305	CB0
29.2059	-0.33431	CB0
29.2139	-0.334315	CB0
29.2224	-0.334319	CB0
29.2309	-0.334323	CB0
29.2392	-0.334326	CB0
29.2476	-0.334329	CB0
29.2567	-0.334332	CB0
29.2657	-0.334334	CB0
29.2728	-0.334337	CB0
29.2815	-0.33434	CB0
29.2889	-0.334344	CB0
29.2983	-0.334349	CB0
29.3048	-0.334354	CB0
29.3147	-0.334359	CB0
29.3221	-0.334365	CB0
29.331	-0.33437	CB0
29.3394	-0.334375	CB0
29.3479	-0.33438	CB0
29.3568	-0.334385	CB0
29.3645	-0.334389	CB0
29.3735	-0.334393	CB0
29.3804	-0.334398	CB0
29.389	-0.334402	CB0
29.3973	-0.334408	CB0
29.4057	-0.334414	CB0
29.4137	-0.33442	CB0
29.422	-0.334426	CB0
29.4305	-0.33443	CB0
29.4396	-0.334434	CB0
29.4481	-0.334437	CB0
29.4562	-0.334441	CB0
29.4657	-0.334444	CB0
29.4738	-0.334448	CB0
29.4813	-0.334451	CB0
29.4899	-0.334455	CB0
29.4981	-0.33446	CB0
29.5064	-0.334466	CB0
29.5142	-0.334471	CB0
29.5223	-0.334476	CB0
29.5299	-0.334481	CB0
29.5394	-0.334485	CB0
29.5467	-0.334489	CB0
29.5551	-0.334494	CB0
29.5641	-0.334497	CB0
29.5717	-0.334501	CB0
29.5808	-0.334505	CB0
29.5897	-0.334508	CB0
29.5978	-0.334512	CB0
29.6058	-0.334515	CB0
29.6138	-0.334518	CB0
29.6217	-0.334521	CB0
29.6303	-0.334524	CB0
29.6394	-0.334527	CB0
29.6472	-0.334532	CB0
29.6563	-0.334536	CB0
29.6644	-0.334542	CB0
29.6718	-0.334547	CB0
29.6803	-0.334553	CB0
29.6894	-0.334559	CB0
29.6978	-0.334564	CB0
29.7065	-0.334568	CB0
29.7144	-0.334572	CB0
29.7221	-0.334576	CB0
29.7297	-0.33458	CB0
29.7388	-0.334584	CB0
29.7482	-0.334588	CB0
29.7558	-0.334591	CB0
29.7647	-0.334596	CB0
29.7722	-0.334601	CB0
29.7813	-0.334606	CB0
29.7894	-0.334611	CB0
29.7978	-0.334616	CB0
29.8059	-0.33462	CB0
29.8141	-0.334624	CB0
29.8223	-0.334627	CB0
29.8304	-0.334631	CB0
29.8397	-0.334634	CB0
29.8479	-0.334639	CB0
29.8564	-0.334644	CB0
29.8644	-0.33465	CB0
29.8725	-0.334653	CB0
29.8817	-0.334656	CB0
29.889	-0.334659	CB0
29.8978	-0.334662	CB0
29.9057	-0.334665	CB0
29.9139	-0.334668	CB0
29.9227	-0.334671	CB0
29.9305	-0.334675	CB0
29.9388	-0.33468	CB0
29.9474	-0.334684	CB0
29.9553	-0.334688	CB0
29.9639	-0.33469	CB0
29.9737	-0.334693	CB0
29.9808	-0.334695	CB0
29.9894	-0.334698	CB0
29.9973	-0.3347	CB0
30.0064	-0.334703	CB0
30.0148	-0.334705	CB0
30.0222	-0.334709	CB0
30.0302	-0.334713	CB0
30.0394	-0.334717	CB0
30.0485	-0.33472	CB0
30.0566	-0.334723	CB0
30.0644	-0.334727	CB0
30.0731	-0.33473	CB0
30.0812	-0.334733	CB0
30.0897	-0.334737	CB0
30.0978	-0.334741	CB0
30.1067	-0.334745	CB0
30.1138	-0.334749	CB0
30.1229	-0.334753	CB0
30.131	-0.334757	CB0
30.1398	-0.33476	CB0
30.1479	-0.334764	CB0
30.1564	-0.334767	CB0
30.1645	-0.334768	CB0
30.1723	-0.33477	CB0
30.1822	-0.334773	CB0
30.1896	-0.334777	CB0
30.1979	-0.334781	CB0
30.2064	-0.334785	CB0
30.2146	-0.33479	CB0
30.2229	-0.334795	CB0
30.2318	-0.3348	CB0
30.2411	-0.334804	CB0
30.2483	-0.334808	CB0
30.2559	-0.334812	CB0
30.2649	-0.334817	CB0
30.2734	-0.334821	CB0
30.2821	-0.334825	CB0
30.2897	-0.334827	CB0
30.2986	-0.334829	CB0
30.3067	-0.334831	CB0
30.3147	-0.334833	CB0
30.323	-0.334835	CB0
30.3306	-0.334838	CB0
30.3401	-0.334839	CB0
30.3481	-0.334843	CB0
30.3567	-0.334847	CB0
30.3643	-0.334851	CB0
30.3722	-0.334856	CB0
30.3819	-0.33486	CB0
30.3895	-0.334865	CB0
30.3981	-0.33487	CB0
30.4064	-0.334874	CB0
30.4154	-0.33488	CB0
30.4227	-0.334885	CB0
30.4322	-0.334893	CB0
30.4401	-0.334905	CB0
30.4488	-0.334914	CB0
30.4563	-0.334919	CB0
30.4661	-0.334924	CB0
30.4734	-0.334928	CB0
30.4819	-0.334931	CB0
30.49	-0.334934	CB0
30.4989	-0.334936	CB0
30.5068	-0.334939	CB0
30.5146	-0.334942	CB0
30.5219	-0.334946	CB0
30.5312	-0.334949	CB0
30.5399	-0.334953	CB0
30.5481	-0.334957	CB0
30.5575	-0.334961	CB0
30.5643	-0.334966	CB0
30.573	-0.33497	CB0
30.5811	-0.334974	CB0
30.5898	-0.334979	CB0
30.5969	-0.334983	CB0
30.606	-0.334988	CB0
30.6148	-0.334992	CB0
30.6229	-0.334995	CB0
30.6323	-0.334998	CB0
30.641	-0.335001	CB0
30.6475	-0.335004	CB0
30.6566	-0.335008	CB0
30.6653	-0.335013	CB0
30.6735	-0.335017	CB0
30.6816	-0.335022	CB0
30.69	-0.335025	CB0
30.6977	-0.335029	CB0
30.7076	-0.335033	CB0
30.716	-0.335037	CB0
30.7228	-0.33504	CB0
30.7318	-0.335042	CB0
30.7396	-0.335044	CB0
30.7478	-0.335047	CB0
30.7565	-0.33505	CB0
30.764	-0.335053	CB0
30.7722	-0.335055	CB0
30.7816	-0.335057	CB0
30.7903	-0.33506	CB0
30.799	-0.335063	CB0
30.8076	-0.335067	CB0
30.8149	-0.335071	CB0
30.8236	-0.335075	CB0
30.8309	-0.335079	CB0
30.8402	-0.335083	CB0
30.8488	-0.335087	CB0
30.8563	-0.335091	CB0
30.8651	-0.335093	CB0
30.8728	-0.335095	CB0
30.8817	-0.335097	CB0
30.89	-0.335097	CB0
30.8978	-0.335098	CB0
30.9066	-0.3351	CB0
30.9144	-0.335103	CB0
30.923	-0.335106	CB0
30.9315	-0.335109	CB0
30.9402	-0.335113	CB0
30.948	-0.335117	CB0
30.9562	-0.335122	CB0
30.9651	-0.335126	CB0
30.9734	-0.33513	CB0
30.9815	-0.335134	CB0
30.991	-0.335137	CB0
30.9981	-0.33514	CB0
31.0066	-0.335143	CB0
31.0155	-0.335146	CB0
31.023	-0.335149	CB0
31.0314	-0.335153	CB0
31.04	-0.335157	CB0
31.0491	-0.335161	CB0
31.057	-0.335167	CB0
31.0648	-0.335175	CB0
31.0734	-0.335182	CB0
31.0818	-0.335188	CB0
31.0905	-0.335192	CB0
31.0989	-0.335195	CB0
31.1073	-0.335196	CB0
31.1155	-0.335196	CB0
31.1238	-0.335196	CB0
31.1322	-0.335197	CB0
31.1406	-0.335197	CB0
31.1483	-0.335199	CB0
31.1556	-0.335201	CB0
31.1647	-0.335204	CB0
31.1734	-0.335207	CB0
31.1808	-0.335211	CB0
31.1902	-0.335214	CB0
31.1989	-0.335217	CB0
31.2076	-0.335219	CB0
31.2151	-0.335222	CB0
31.2236	-0.335225	CB0
31.2317	-0.335226	CB0
31.2402	-0.335229	CB0
31.2498	-0.335232	CB0
31.2576	-0.335236	CB0
31.2657	-0.33524	CB0
31.2746	-0.335246	CB0
31.2828	-0.335251	CB0
31.291	-0.335256	CB0
31.2988	-0.33526	CB0
31.308	-0.335265	CB0
31.3165	-0.335269	CB0
31.3243	-0.335273	CB0
31.3327	-0.335276	CB0
31.3394	-0.335279	CB0
31.3493	-0.33528	CB0
31.357	-0.335282	CB0
31.3658	-0.335284	CB0
31.3744	-0.335287	CB0
31.382	-0.33529	CB0
31.39	-0.335294	CB0
31.3992	-0.335298	CB0
31.408	-0.335301	CB0
31.4163	-0.335306	CB0
31.4241	-0.335311	CB0
31.4323	-0.335315	CB0
31.441	-0.33532	CB0
31.4491	-0.335324	CB0
31.4575	-0.335329	CB0
31.4659	-0.335332	CB0
31.4741	-0.335334	CB0
31.4827	-0.335336	CB0
31.4907	-0.335337	CB0
31.4993	-0.33534	CB0
31.5071	-0.335343	CB0
31.5155	-0.335345	CB0
31.5238	-0.335347	CB0
31.532	-0.33535	CB0
31.5393	-0.335355	CB0
31.5487	-0.335359	CB0
31.5566	-0.335363	CB0
31.5654	-0.335367	CB0
31.5741	-0.335371	CB0
31.5819	-0.335375	CB0
31.5905	-0.335379	CB0
31.5984	-0.335383	CB0
31.607	-0.335386	CB0
31.6157	-0.335388	CB0
31.6237	-0.33539	CB0
31.6319	-0.335392	CB0
31.6405	-0.335391	CB0
31.6489	-0.33539	CB0
31.6578	-0.335389	CB0
31.6655	-0.335389	CB0
31.6745	-0.33539	CB0
31.6821	-0.335392	CB0
31.69	-0.335395	CB0
31.6995	-0.335399	CB0
31.7072	-0.335403	CB0
31.7159	-0.335407	CB0
31.7242	-0.33541	CB0
31.7324	-0.335412	CB0
31.7411	-0.335413	CB0
31.7484	-0.335413	CB0
31.757	-0.335413	CB0
31.7653	-0.335414	CB0
31.7736	-0.335416	CB0
31.7827	-0.335418	CB0
31.791	-0.33542	CB0
31.799	-0.335423	CB0
31.8081	-0.335425	CB0
31.8155	-0.335427	CB0
31.8251	-0.335429	CB0
31.8328	-0.335431	CB0
31.8405	-0.335434	CB0
31.8486	-0.335436	CB0
31.8572	-0.335438	CB0
31.8656	-0.335439	CB0
31.8745	-0.335441	CB0
31.8823	-0.335443	CB0
31.891	-0.335446	CB0
31.8991	-0.335448	CB0
31.9068	-0.335451	CB0
31.9167	-0.335452	CB0
31.924	-0.335453	CB0
31.9312	-0.335453	CB0
31.9412	-0.335453	CB0
31.9493	-0.335453	CB0
31.9569	-0.335453	CB0
31.9655	-0.335454	CB0
31.974	-0.335455	CB0
31.9828	-0.335458	CB0
31.9916	-0.335462	CB0
31.9991	-0.335468	CB0
32.008	-0.335474	CB0
32.0157	-0.335478	CB0
32.0239	-0.335481	CB0
32.032	-0.335483	CB0
32.0414	-0.335483	CB0
32.0498	-0.335483	CB0
32.0571	-0.335483	CB0
32.0658	-0.335483	CB0
32.0746	-0.335484	CB0
32.0833	-0.335485	CB0
32.0906	-0.335487	CB0
32.0992	-0.33549	CB0
32.1077	-0.335493	CB0
32.1167	-0.335496	CB0
32.1245	-0.335499	CB0
32.1326	-0.335501	CB0
32.1405	-0.335502	CB0
32.1481	-0.335503	CB0
32.157	-0.335505	CB0
32.1661	-0.335509	CB0
32.1745	-0.335512	CB0
32.1832	-0.335519	CB0
32.1908	-0.335531	CB0
32.1989	-0.335535	CB0
32.2077	-0.335539	CB0
32.2161	-0.335541	CB0
32.2247	-0.335542	CB0
32.2331	-0.335543	CB0
32.2414	-0.335544	CB0
32.2502	-0.335545	CB0
32.2584	-0.335548	CB0
32.2667	-0.335551	CB0
32.2742	-0.335554	CB0
32.283	-0.335557	CB0
32.2908	-0.335558	CB0
32.299	-0.33556	CB0
32.3078	-0.33556	CB0
32.3152	-0.335561	CB0
32.3245	-0.335561	CB0
32.3334	-0.335563	CB0
32.3408	-0.335565	CB0
32.3496	-0.335566	CB0
32.358	-0.33557	CB0
32.3651	-0.335573	CB0
32.3741	-0.335576	CB0
32.3825	-0.335579	CB0
32.3912	-0.335581	CB0
32.3996	-0.335584	CB0
32.4077	-0.335587	CB0
32.4166	-0.33559	CB0
32.4241	-0.335593	CB0
32.4329	-0.335597	CB0
32.4419	-0.335599	CB0
32.4493	-0.335601	CB0
32.4581	-0.335602	CB0
32.4662	-0.335603	CB0
32.4751	-0.335605	CB0
32.4828	-0.335607	CB0
32.4919	-0.335608	CB0
32.4994	-0.335611	CB0
32.5083	-0.335613	CB0
32.516	-0.335616	CB0
32.5242	-0.335619	CB0
32.5329	-0.335624	CB0
32.5413	-0.335629	CB0
32.549	-0.335632	CB0
32.5583	-0.335635	CB0
32.5659	-0.335638	CB0
32.5736	-0.33564	CB0
32.5824	-0.335642	CB0
32.59	-0.335645	CB0
32.5988	-0.335647	CB0
32.6068	-0.335649	CB0
32.616	-0.335652	CB0
32.6242	-0.335656	CB0
32.6326	-0.335659	CB0
32.6416	-0.335663	CB0
32.6494	-0.335667	CB0
32.6578	-0.335671	CB0
32.6662	-0.335674	CB0
32.6744	-0.335675	CB0
32.6826	-0.335678	CB0
32.6908	-0.33568	CB0
32.6982	-0.335683	CB0
32.7069	-0.335686	CB0
32.716	-0.335689	CB0
32.7251	-0.335693	CB0
32.7326	-0.335695	CB0
32.7418	-0.335698	CB0
32.7504	-0.3357	CB0
32.7585	-0.335701	CB0
32.7671	-0.335702	CB0
32.7754	-0.335703	CB0
32.7829	-0.335705	CB0
32.7912	-0.335708	CB0
32.7995	-0.335711	CB0
32.8073	-0.335714	CB0
32.8156	-0.335718	CB0
32.8247	-0.33572	CB0
32.833	-0.335723	CB0
32.841	-0.335725	CB0
32.8493	-0.335727	CB0
32.8583	-0.335729	CB0
32.8671	-0.335731	CB0
32.8751	-0.335733	CB0
32.8834	-0.335736	CB0
32.8926	-0.335738	CB0
32.9002	-0.335741	CB0
32.9085	-0.335744	CB0
32.9164	-0.335746	CB0
32.9247	-0.335748	CB0
32.9326	-0.33575	CB0
32.9411	-0.335754	CB0
32.9494	-0.335758	CB0
32.9579	-0.335763	CB0
32.9668	-0.335767	CB0
32.9752	-0.335772	CB0
32.9833	-0.335776	CB0
32.9919	-0.335778	CB0
32.999	-0.33578	CB0
33.0082	-0.335781	CB0
33.0157	-0.335783	CB0
33.0252	-0.335784	CB0
33.0326	-0.335786	CB0
33.0416	-0.335788	CB0
33.0503	-0.335791	CB0
33.0586	-0.335795	CB0
33.0667	-0.335799	CB0
33.0751	-0.335804	CB0
33.0833	-0.335807	CB0
33.0919	-0.335809	CB0
33.0995	-0.335811	CB0
33.1072	-0.335813	CB0
33.1161	-0.335814	CB0
33.1236	-0.335815	CB0
33.1324	-0.335816	CB0
33.1412	-0.335817	CB0
33.1486	-0.335819	CB0
33.1567	-0.335822	CB0
33.1661	-0.335825	CB0
33.1751	-0.335828	CB0
33.1826	-0.335831	CB0
33.1914	-0.335834	CB0
33.1999	-0.335838	CB0
33.2087	-0.335841	CB0
33.2175	-0.335844	CB0
33.2247	-0.335848	CB0
33.2341	-0.335852	CB0
33.2415	-0.335855	CB0
33.2502	-0.335858	CB0
33.259	-0.335862	CB0
33.267	-0.335866	CB0
33.2747	-0.33587	CB0
33.2831	-0.335873	CB0
33.2913	-0.335876	CB0
33.2998	-0.335878	CB0
33.3075	-0.33588	CB0
33.3167	-0.335882	CB0
33.3255	-0.335885	CB0
33.3336	-0.335888	CB0
33.3409	-0.335891	CB0
33.3504	-0.335895	CB0
33.3588	-0.335899	CB0
33.3669	-0.335903	CB0
33.3749	-0.335906	CB0
33.383	-0.335909	CB0
33.3917	-0.335913	CB0
33.3991	-0.335915	CB0
33.4085	-0.335918	CB0
33.4167	-0.335922	CB0
33.4244	-0.335924	CB0
33.4336	-0.335927	CB0
33.4422	-0.335929	CB0
33.4495	-0.335932	CB0
33.4574	-0.335934	CB0
33.4671	-0.335937	CB0
33.4754	-0.335939	CB0
33.4835	-0.335941	CB0
33.4917	-0.335943	CB0
33.4995	-0.335945	CB0
33.5083	-0.335947	CB0
33.5178	-0.335949	CB0
33.5255	-0.335951	CB0
33.5338	-0.335953	CB0
33.5418	-0.335956	CB0
33.5496	-0.335959	CB0
33.5583	-0.335961	CB0
33.5658	-0.335964	CB0
33.5748	-0.335967	CB0
33.5824	-0.33597	CB0
33.5914	-0.335974	CB0
33.6003	-0.335976	CB0
33.6089	-0.335979	CB0
33.6163	-0.335982	CB0
33.6247	-0.335984	CB0
33.6331	-0.335986	CB0
33.6417	-0.335988	CB0
33.6495	-0.33599	CB0
33.6588	-0.335993	CB0
33.6669	-0.335996	CB0
33.6747	-0.335999	CB0
33.6832	-0.336003	CB0
33.6924	-0.336007	CB0
33.6991	-0.336011	CB0
33.7092	-0.336015	CB0
33.7164	-0.336019	CB0
33.7248	-0.336023	CB0
33.734	-0.336027	CB0
33.7415	-0.336031	CB0
33.7495	-0.336034	CB0
33.7584	-0.336037	CB0
33.7665	-0.336042	CB0
33.775	-0.336046	CB0
33.783	-0.33605	CB0
33.7915	-0.336055	CB0
33.8002	-0.336058	CB0
33.8085	-0.336063	CB0
33.8171	-0.336066	CB0
33.8241	-0.33607	CB0
33.8327	-0.336073	CB0
33.8409	-0.336077	CB0
33.8487	-0.336081	CB0
33.859	-0.336085	CB0
33.867	-0.33609	CB0
33.8742	-0.336095	CB0
33.8831	-0.336099	CB0
33.8925	-0.336104	CB0
33.8995	-0.336109	CB0
33.9089	-0.336113	CB0
33.9176	-0.336116	CB0
33.9249	-0.336119	CB0
33.933	-0.336122	CB0
33.9422	-0.336126	CB0
33.9501	-0.336129	CB0
33.9591	-0.336132	CB0
33.9674	-0.336135	CB0
33.9755	-0.336138	CB0
33.9837	-0.336142	CB0
33.9923	-0.336146	CB0
34.0008	-0.336149	CB0
34.0088	-0.336153	CB0
34.0169	-0.336157	CB0
34.0245	-0.336162	CB0
34.0333	-0.336166	CB0
34.0414	-0.33617	CB0
34.0494	-0.336173	CB0
34.0582	-0.336176	CB0
34.067	-0.33618	CB0
34.0745	-0.336183	CB0
34.0843	-0.336188	CB0
34.0916	-0.336193	CB0
34.1011	-0.336198	CB0
34.11	-0.336203	CB0
34.1176	-0.336208	CB0
34.1257	-0.336212	CB0
34.1335	-0.336216	CB0
34.1419	-0.336218	CB0
34.1496	-0.336219	CB0
34.1602	-0.336221	CB0
34.1671	-0.336224	CB0
34.1756	-0.336229	CB0
34.1842	-0.336234	CB0
34.1926	-0.336238	CB0
34.2012	-0.336244	CB0
34.2089	-0.33625	CB0
34.2173	-0.336256	CB0
34.2259	-0.336261	CB0
34.2342	-0.336266	CB0
34.2429	-0.336269	CB0
34.2504	-0.336273	CB0
34.2592	-0.336276	CB0
34.2666	-0.336279	CB0
34.2759	-0.336282	CB0
34.2838	-0.336285	CB0
34.2923	-0.336288	CB0
34.3005	-0.33629	CB0
34.3094	-0.336293	CB0
34.3176	-0.336296	CB0
34.3257	-0.3363	CB0
34.334	-0.336304	CB0
34.3416	-0.336308	CB0
34.3504	-0.336312	CB0
34.3589	-0.336316	CB0
34.3672	-0.33632	CB0
34.3753	-0.336323	CB0
34.3837	-0.336327	CB0
34.3926	-0.336329	CB0
34.401	-0.336332	CB0
34.4089	-0.336335	CB0
34.4169	-0.33634	CB0
34.4262	-0.336345	CB0
34.434	-0.336349	CB0
34.4421	-0.336352	CB0
34.4515	-0.336356	CB0
34.4592	-0.336359	CB0
34.4675	-0.336362	CB0
34.4753	-0.336364	CB0
34.4828	-0.336365	CB0
34.4928	-0.336366	CB0
34.5008	-0.336368	CB0
34.5086	-0.336371	CB0
34.5181	-0.336375	CB0
34.5262	-0.336379	CB0
34.535	-0.336384	CB0
34.5433	-0.336389	CB0
34.5524	-0.336393	CB0
34.5607	-0.336398	CB0
34.5673	-0.336402	CB0
34.576	-0.336405	CB0
34.584	-0.336408	CB0
34.5925	-0.33641	CB0
34.6007	-0.336413	CB0
34.6089	-0.336415	CB0
34.6175	-0.336417	CB0
34.6263	-0.336418	CB0
34.6338	-0.33642	CB0
34.6422	-0.336422	CB0
34.65	-0.336424	CB0
34.6596	-0.336427	CB0
34.6678	-0.33643	CB0
34.676	-0.336433	CB0
34.6851	-0.336435	CB0
34.6932	-0.336438	CB0
34.7014	-0.336442	CB0
34.7091	-0.336446	CB0
34.7177	-0.33645	CB0
34.7262	-0.336453	CB0
34.7346	-0.336457	CB0
34.7423	-0.33646	CB0
34.7506	-0.336463	CB0
34.7596	-0.336466	CB0
34.7677	-0.336469	CB0
34.7752	-0.336471	CB0
34.7844	-0.336472	CB0
34.792	-0.336474	CB0
34.8009	-0.336477	CB0
34.809	-0.33648	CB0
34.8183	-0.336483	CB0
34.8262	-0.336486	CB0
34.8338	-0.336491	CB0
34.8433	-0.336496	CB0
34.8518	-0.336504	CB0
34.86	-0.33651	CB0
34.8683	-0.336514	CB0
34.876	-0.336517	CB0
34.8845	-0.336518	CB0
34.8925	-0.336519	CB0
34.901	-0.33652	CB0
34.9096	-0.336521	CB0
34.9175	-0.336521	CB0
34.926	-0.336522	CB0
34.9348	-0.336523	CB0
34.9434	-0.336526	CB0
34.9512	-0.336529	CB0
34.9595	-0.336532	CB0
34.9671	-0.336535	CB0
34.975	-0.336538	CB0
34.984	-0.336539	CB0
34.9924	-0.33654	CB0
35.0003	-0.336541	CB0
35.0096	-0.336543	CB0
35.0183	-0.336544	CB0
35.0257	-0.336545	CB0
35.0347	-0.336548	CB0
35.0432	-0.336549	CB0
35.0508	-0.336551	CB0
35.0591	-0.336553	CB0
35.0671	-0.336556	CB0
35.0758	-0.336559	CB0
35.0839	-0.336561	CB0
35.0926	-0.336563	CB0
35.1001	-0.336565	CB0
35.1095	-0.336567	CB0
35.1169	-0.336568	CB0
35.1266	-0.33657	CB0
35.1342	-0.336571	CB0
35.1426	-0.336573	CB0
35.1514	-0.336576	CB0
35.1589	-0.336579	CB0
35.168	-0.336583	CB0
35.1766	-0.336586	CB0
35.1857	-0.33659	CB0
35.1929	-0.336593	CB0
35.2016	-0.336596	CB0
35.2102	-0.336599	CB0
35.2183	-0.336601	CB0
35.2265	-0.336602	CB0
35.2346	-0.336604	CB0
35.2426	-0.336605	CB0
35.2506	-0.336607	CB0
35.2591	-0.336609	CB0
35.2678	-0.33661	CB0
[truncated: 22,004 more rows]

## Sheet: Betaine points_12
Temperature	adjusted_heatflow
33.5824	-0.323267
33.5613	-0.329253
33.5991	-0.335369
33.6231	-0.340992
35.2807	-0.346805
41.527	-0.32308
41.3372	-0.329076
41.2158	-0.33507
41.1737	-0.341094
43.2456	-0.347698

## Sheet: 6F_Betaine_Enthalpy_12
Sample	Trial	Tm	Enthalpy	Avg_Tm	Stdev_Tm	Avg_Enthalpy	Stdev_Enthalpy	C_Enthalpy	Avg_C_Enthalpy	Stdev_C_Enthalpy
CB0	1	36.5066	0.056843	36.4067	0.268553	0.050442	0.00818389
CB0	2	36.1025	0.041221
CB0	3	36.6109	0.053262
CB1	1	36.739	0.048746	36.4701	0.23716	0.047345	0.00349674	0.008097	-0.003097	0.00512475
CB1	2	36.3805	0.043365					-0.002144
CB1	3	36.2908	0.049924					0.003338
CB10	1	36.3568	0.052865	36.3369	0.101254	0.049546	0.00510053	0.003978	-0.000896	0.00322324
CB10	2	36.4267	0.043673					-0.002452
CB10	3	36.2272	0.0521					0.001162
CB100	1	37.2309	0.055645	37.1142	0.242566	0.050355	0.00724062	0.001198	-8.7e-05	0.00104725
CB100	2	37.2764	0.042103					-0.000882
CB100	3	36.8354	0.053317					-5.5e-05
CB500	1	40.7634	0.038458	40.0772	0.951272	0.0323593	0.00655242	0.018385	-0.0180827	0.00215844
CB500	2	38.9913	0.025432					0.015789
CB500	3	40.4769	0.033188					0.020074

## Sheet: 6G_Betaine
Q	I(Q)	Error
0.0114	12.4	49.2
0.0119	13.1	39.2
0.0124	9.24	32.5
0.0129	13.4	24.9
0.0134	13.3	17.6
0.0139	15.4	14.5
0.0144	13.5	9.54
0.015	12.1	6.41
0.0155	13.5	4.73
0.016	13.1	3.47
0.0165	13	2.58
0.017	12.8	2.11
0.0175	12.1	1.73
0.018	12.8	1.23
0.0185	12.2	0.934
0.019	12.3	0.78
0.0195	11.7	0.613
0.02	11.3	0.538
0.0205	11.5	0.467
0.021	11.5	0.392
0.0215	11.1	0.345
0.022	11.1	0.344
0.0226	11	0.311
0.0231	10.6	0.269
0.0236	10.7	0.251
0.0241	10.1	0.249
0.0246	9.7	0.232
0.0251	9.63	0.213
0.0256	9.38	0.208
0.0261	9.56	0.198
0.0266	9.35	0.194
0.0271	9.28	0.196
0.0276	8.84	0.179
0.0281	8.86	0.177
0.0286	8.55	0.178
0.0291	8.44	0.182
0.0297	8.46	0.17
0.0302	8.18	0.167
0.0307	7.87	0.165
0.0312	7.66	0.163
0.0317	7.82	0.157
0.0322	7.42	0.156
0.0327	7.33	0.155
0.0332	7.52	0.148
0.0337	7.18	0.15
0.0342	6.83	0.149
0.0347	6.86	0.147
0.0352	6.69	0.142
0.0357	6.69	0.143
0.0362	6.55	0.137
0.0367	6.47	0.136
0.0373	6.07	0.133
0.0378	6.29	0.135
0.0383	6.09	0.134
0.0388	5.9	0.13
0.0393	6	0.126
0.0398	5.87	0.13
0.0403	5.74	0.125
0.0408	5.5	0.125
0.0413	5.39	0.125
0.0418	5.4	0.126
0.0423	5.23	0.121
0.0428	5.06	0.122
0.0433	4.85	0.119
0.0438	4.94	0.118
0.0443	4.97	0.116
0.0449	4.59	0.113
0.0454	4.87	0.114
0.0459	4.77	0.114
0.0464	4.38	0.111
0.0469	4.37	0.114
0.0474	4.4	0.109
0.0479	4.3	0.108
0.0484	4.14	0.109
0.0489	4.23	0.105
0.0494	4.21	0.109
0.0499	4.04	0.107
0.0504	4.01	0.106
0.0509	4.22	0.106
0.0514	3.75	0.102
0.0519	3.75	0.101
0.0525	3.62	0.1
0.053	3.84	0.098
0.0535	3.76	0.101
0.054	3.6	0.0986
0.0545	3.54	0.0971
0.055	3.53	0.0952
0.0555	3.45	0.097
0.056	3.32	0.0938
0.0565	3.18	0.0967
0.057	3.3	0.0925
0.0575	3.22	0.0934
0.058	3.15	0.092
0.0585	2.97	0.0922
0.059	3	0.0941
0.0596	2.99	0.0907
0.0601	2.95	0.089
0.0606	3.07	0.0926
0.0611	2.88	0.0902
0.0616	2.85	0.087
0.0621	2.89	0.0878
0.0626	2.61	0.0868
0.0631	2.78	0.0874
0.0636	2.63	0.0869
0.0641	2.69	0.0866
0.0646	2.57	0.0848
0.0651	2.56	0.0867
0.0656	2.62	0.0839
0.0661	2.6	0.085
0.0666	2.72	0.0846
0.0672	2.39	0.0833
0.0677	2.38	0.0833
0.0682	2.43	0.0815
0.0687	2.36	0.0824
0.0692	2.46	0.0829
0.0697	2.32	0.0817
0.0702	2.19	0.0808
0.0707	2.18	0.0811
0.0712	2.16	0.0796
0.0717	2.07	0.0802
0.0722	2.18	0.078
0.0727	2.13	0.0797
0.0732	2.05	0.0781
0.0737	2.13	0.0784
0.0742	2.01	0.077
0.0748	2.07	0.0792
0.0753	2.12	0.0755
0.0758	2.06	0.0759
0.0763	1.91	0.0752
0.0768	1.94	0.0765
0.0773	1.86	0.0745
0.0778	1.81	0.0746
0.0783	1.97	0.0748
0.0788	1.86	0.0735
0.0793	1.76	0.0743
0.0798	1.97	0.0775
0.0803	1.73	0.0755
0.0808	1.72	0.0753
0.0813	1.81	0.0763
0.0818	1.84	0.0766
0.0824	1.6	0.0753
0.0829	1.68	0.0758
0.0834	1.82	0.0757
0.0839	1.68	0.076
0.0844	1.63	0.0748
0.0849	1.59	0.0761
0.0854	1.62	0.0754
0.0859	1.46	0.0751
0.0864	1.51	0.0754
0.0869	1.64	0.0754
0.0874	1.65	0.075
0.0879	1.55	0.0736
0.0884	1.54	0.0739
0.0889	1.6	0.0744
0.0894	1.5	0.0739
0.09	1.37	0.0743
0.0905	1.41	0.0738
0.091	1.48	0.0741
0.0915	1.43	0.0723
0.092	1.44	0.072
0.0925	1.33	0.0711
0.093	1.44	0.0712
0.0935	1.32	0.0715
0.094	1.35	0.073
0.0945	1.26	0.0729
0.095	1.38	0.0708
0.0955	1.35	0.0709
0.096	1.34	0.0734
0.0965	1.32	0.0711
0.0971	1.31	0.0725
0.0976	1.47	0.0735
0.0981	1.3	0.073
0.0986	1.28	0.0715
0.0991	1.29	0.0727
0.0996	1.26	0.072
0.1	1.24	0.071
0.101	1.27	0.0703
0.101	1.13	0.0724
0.102	1.22	0.0719
0.102	1.24	0.0726
0.103	1.22	0.0729
0.103	1.17	0.0718
0.104	1.28	0.0715
0.104	1.1	0.0695
0.105	1.11	0.071
0.105	1.04	0.0686
0.106	1.17	0.0696
0.106	1.23	0.0704
0.107	1.15	0.0693
0.107	1.14	0.0689
0.108	1.11	0.0666
0.108	1.12	0.0667
0.109	1.16	0.0662
0.109	1.1	0.0662
0.11	1.05	0.0666
0.11	1.16	0.0651
0.111	1.1	0.065
0.111	1.04	0.0649
0.112	1.07	0.065
0.112	1.01	0.0639
0.113	1.15	0.0644
0.113	0.891	0.0645
0.114	1.01	0.0639
0.114	1.03	0.0622
0.115	1.02	0.0628
0.115	0.873	0.0624
0.116	0.99	0.0622
0.116	1.07	0.0622
0.117	0.962	0.062
0.117	0.993	0.0609
0.118	0.914	0.0607
0.118	0.951	0.0606
0.119	1.03	0.0613
0.119	0.954	0.0599
0.12	0.889	0.06
0.12	0.904	0.0611
0.121	0.931	0.0602
0.121	0.893	0.0599
0.122	0.892	0.0591
0.122	0.95	0.059
0.123	0.966	0.0591
0.123	0.869	0.0586
0.124	0.916	0.0587
0.124	0.829	0.0581
0.125	0.91	0.0592
0.125	0.913	0.0583
0.126	0.899	0.0581
0.126	0.896	0.0568
0.127	0.916	0.0558
0.127	0.772	0.0581
0.128	0.898	0.0571
0.128	0.905	0.0567
0.129	0.762	0.0575
0.129	0.94	0.0558
0.13	0.814	0.0558
0.13	0.782	0.0561
0.131	0.837	0.0556
0.132	0.817	0.0552
0.132	0.815	0.0552
0.133	0.827	0.0552
0.133	0.76	0.0545
0.134	0.792	0.0546
0.134	0.755	0.0535
0.135	0.762	0.0546
0.135	0.696	0.0544
0.136	0.761	0.0538
0.136	0.769	0.0539
0.137	0.774	0.0541
0.137	0.734	0.054
0.138	0.869	0.053
0.138	0.715	0.0538
0.139	0.71	0.0533
0.139	0.695	0.0526
0.14	0.775	0.0536
0.14	0.762	0.0534
0.141	0.718	0.0525
0.141	0.696	0.0522
0.142	0.692	0.0521
0.142	0.725	0.0525
0.143	0.731	0.0522
0.143	0.697	0.0522
0.144	0.633	0.0521
0.144	0.758	0.0515
0.145	0.663	0.0512
0.145	0.663	0.0519
0.146	0.692	0.0509
0.146	0.583	0.0507
0.147	0.743	0.0508
0.147	0.72	0.0512
0.148	0.69	0.0507
0.148	0.681	0.0509
0.149	0.61	0.0512
0.149	0.635	0.0506
0.15	0.633	0.0512
0.15	0.65	0.0502
0.151	0.637	0.0502
0.151	0.641	0.0507
0.152	0.634	0.0501
0.152	0.605	0.0505
0.153	0.625	0.0498
0.153	0.669	0.0492
0.154	0.684	0.0494
0.154	0.703	0.0499
0.155	0.615	0.0494
0.155	0.611	0.0494
0.156	0.627	0.0491
0.156	0.648	0.0487
0.157	0.593	0.0494
0.157	0.676	0.049
0.158	0.559	0.049
0.158	0.621	0.0483
0.159	0.634	0.0479
0.159	0.549	0.0484
0.16	0.546	0.0482
0.16	0.579	0.0479
0.161	0.616	0.0488
0.161	0.647	0.0479
0.162	0.482	0.0477
0.162	0.608	0.0471
0.163	0.534	0.048
0.163	0.561	0.0476
0.164	0.515	0.0472
0.164	0.593	0.0478
0.165	0.503	0.047
0.165	0.563	0.047
0.166	0.585	0.0467
0.166	0.579	0.0471
0.167	0.605	0.0466
0.167	0.548	0.0477
0.168	0.633	0.0475
0.168	0.528	0.0478
0.169	0.529	0.0479
0.17	0.553	0.0477
0.17	0.538	0.0479
0.171	0.527	0.048
0.171	0.568	0.0471
0.172	0.597	0.0481
0.172	0.522	0.0477
0.173	0.532	0.0485
0.173	0.587	0.048
0.174	0.512	0.0481
0.174	0.479	0.0478
0.175	0.495	0.048
0.175	0.463	0.0473
0.176	0.446	0.0477
0.176	0.531	0.0477
0.177	0.432	0.0483
0.177	0.522	0.048
0.178	0.479	0.0475
0.178	0.534	0.0476
0.179	0.466	0.0485
0.179	0.489	0.0481
0.18	0.492	0.0476
0.18	0.502	0.0481
0.181	0.54	0.0486
0.181	0.547	0.0472
0.182	0.61	0.0481
0.182	0.519	0.0491
0.183	0.445	0.0491
0.183	0.438	0.048
0.184	0.505	0.0487
0.184	0.508	0.0489
0.185	0.528	0.0491
0.185	0.455	0.0499
0.186	0.419	0.0498
0.186	0.489	0.0499
0.187	0.497	0.0495
0.187	0.559	0.05
0.188	0.388	0.0504
0.188	0.516	0.0506
0.189	0.475	0.0503
0.189	0.453	0.0506
0.19	0.358	0.0502
0.19	0.418	0.0509
0.191	0.453	0.0508
0.191	0.439	0.0511
0.192	0.399	0.0505
0.192	0.51	0.0509
0.193	0.46	0.0508
0.193	0.525	0.051
0.194	0.446	0.0513
0.194	0.467	0.0513
0.195	0.522	0.0524
0.195	0.489	0.0508
0.196	0.438	0.0507
0.196	0.345	0.0518
0.197	0.394	0.0515
0.197	0.376	0.0518
0.198	0.451	0.0517
0.198	0.394	0.0518
0.199	0.449	0.0513
0.199	0.462	0.0515
0.2	0.484	0.0518
0.2	0.468	0.0515
0.201	0.503	0.0511
0.201	0.438	0.0521
0.202	0.512	0.0522
0.202	0.417	0.0518
0.203	0.346	0.0519
0.203	0.423	0.0518
0.204	0.373	0.0515
0.204	0.475	0.0513
0.205	0.387	0.051
0.205	0.46	0.0522
0.206	0.375	0.0514
0.207	0.404	0.0518
0.207	0.438	0.052
0.208	0.489	0.0519
0.208	0.44	0.0511
0.209	0.4	0.0522
0.209	0.416	0.0522
0.21	0.457	0.0514
0.21	0.474	0.0512
0.211	0.451	0.0517
0.211	0.379	0.0522
0.212	0.433	0.0514
0.212	0.316	0.0512
0.213	0.404	0.052
0.213	0.371	0.051
0.214	0.411	0.0517
0.214	0.403	0.0522
0.215	0.337	0.0514
0.215	0.339	0.0512
0.216	0.417	0.0514
0.216	0.411	0.0512
0.217	0.376	0.0509
0.217	0.381	0.0505
0.218	0.374	0.0512
0.218	0.344	0.0509
0.219	0.318	0.0513
0.219	0.387	0.051
0.22	0.316	0.0514
0.22	0.265	0.0503
0.221	0.311	0.0506
0.221	0.363	0.0507
0.222	0.43	0.0509
0.222	0.387	0.0505
0.223	0.307	0.0505
0.223	0.387	0.0512
0.224	0.36	0.0502
0.224	0.38	0.0501
0.225	0.287	0.0504
0.225	0.311	0.0494
0.226	0.4	0.0494
0.226	0.423	0.0495
0.227	0.329	0.0503
0.227	0.418	0.0494
0.228	0.343	0.0491
0.228	0.355	0.0491
0.229	0.351	0.0486
0.229	0.357	0.0485
0.23	0.362	0.0489
0.23	0.405	0.0491
0.231	0.364	0.0474
0.231	0.351	0.0479
0.232	0.328	0.0487
0.232	0.324	0.0479
0.233	0.346	0.0479
0.233	0.35	0.0477
0.234	0.365	0.0477
0.234	0.406	0.047
0.235	0.336	0.047
0.235	0.338	0.0469
0.236	0.325	0.0465
0.236	0.344	0.047
0.237	0.342	0.0469
0.237	0.271	0.0467
0.238	0.336	0.0469
0.238	0.296	0.0461
0.239	0.324	0.0464
0.239	0.27	0.0463
0.24	0.343	0.0463
0.24	0.302	0.0457
0.241	0.392	0.0463
0.241	0.31	0.0458
0.242	0.285	0.0453
0.242	0.268	0.0454
0.243	0.275	0.0453
0.243	0.351	0.0458
0.244	0.332	0.0454
0.244	0.285	0.0451
0.245	0.306	0.045
0.246	0.355	0.045
0.246	0.357	0.0457
0.247	0.338	0.0452
0.247	0.317	0.0446
0.248	0.291	0.0448
0.248	0.32	0.0451
0.249	0.296	0.0443
0.249	0.353	0.0452
0.25	0.292	0.0443
0.25	0.335	0.0442
0.251	0.352	0.0442
0.251	0.249	0.0442
0.252	0.279	0.0438
0.252	0.267	0.0435
0.253	0.315	0.0437
0.253	0.311	0.0443
0.254	0.363	0.0439
0.254	0.274	0.044
0.255	0.21	0.0438
0.255	0.263	0.0434
0.256	0.293	0.0433
0.256	0.311	0.0433
0.257	0.301	0.0426
0.257	0.271	0.0434
0.258	0.306	0.0426
0.258	0.296	0.0429
0.259	0.295	0.043
0.259	0.31	0.0431
0.26	0.322	0.0429
0.26	0.252	0.0418
0.261	0.289	0.0423
0.261	0.305	0.0421
0.262	0.28	0.0419
0.262	0.332	0.0417
0.263	0.347	0.0421
0.263	0.322	0.0424
0.264	0.225	0.0416
0.264	0.351	0.042
0.265	0.266	0.0416
0.265	0.295	0.0413
0.266	0.28	0.0418
0.266	0.278	0.0414
0.267	0.331	0.0416
0.267	0.199	0.0414
0.268	0.276	0.0421
0.268	0.204	0.0408
0.269	0.271	0.041
0.269	0.248	0.0418
0.27	0.229	0.0413
0.27	0.215	0.0411
0.271	0.269	0.0409
0.271	0.269	0.0408
0.272	0.255	0.0408
0.272	0.306	0.0408
0.273	0.217	0.0409
0.273	0.242	0.0409
0.274	0.337	0.0402
0.274	0.278	0.0405
0.275	0.314	0.0407
0.275	0.211	0.0404
0.276	0.263	0.0401
0.276	0.26	0.0404
0.277	0.271	0.0401
0.277	0.216	0.0399
0.278	0.234	0.04
0.278	0.189	0.0399
0.279	0.301	0.0402
0.279	0.317	0.0401
0.28	0.227	0.0407
0.28	0.262	0.0396
0.281	0.22	0.0396
0.281	0.242	0.0398
0.282	0.272	0.0398
0.282	0.235	0.0394
0.283	0.251	0.0399
0.284	0.228	0.0399
0.284	0.27	0.0397
0.285	0.197	0.0396
0.285	0.307	0.0397
0.286	0.277	0.0395
0.286	0.23	0.039
0.287	0.297	0.0391
0.287	0.301	0.0398
0.288	0.254	0.0397
0.288	0.227	0.0396
0.289	0.225	0.0396
0.289	0.254	0.0401
0.29	0.211	0.0393
0.29	0.277	0.0397
0.291	0.258	0.0401
0.291	0.245	0.0397
0.292	0.25	0.0395
0.292	0.272	0.0395
0.293	0.231	0.0398
0.293	0.273	0.0394
0.294	0.249	0.0392
0.294	0.252	0.04
0.295	0.198	0.0393
0.295	0.255	0.0394
0.296	0.244	0.0393
0.296	0.224	0.0395
0.297	0.225	0.0394
0.297	0.244	0.0395
0.298	0.231	0.0393
0.298	0.228	0.0392
0.299	0.204	0.039
0.299	0.175	0.0396
0.3	0.249	0.0398
0.3	0.256	0.0393
0.301	0.256	0.0391
0.301	0.206	0.0391
0.302	0.239	0.0392
0.302	0.21	0.0393
0.303	0.238	0.0392
0.303	0.192	0.0393
0.304	0.267	0.0389
0.304	0.238	0.0388
0.305	0.248	0.0392
0.305	0.126	0.0388
0.306	0.253	0.039
0.306	0.29	0.0387
0.307	0.185	0.0387
0.307	0.22	0.0391
0.308	0.222	0.0392
0.308	0.283	0.0393
0.309	0.213	0.0394
0.309	0.152	0.0391
0.31	0.206	0.0389
0.31	0.225	0.0392
0.311	0.224	0.0394
0.311	0.205	0.0395
0.312	0.21	0.0402
0.312	0.226	0.0404
0.313	0.18	0.0405
0.313	0.223	0.0407
0.314	0.174	0.0407
0.314	0.258	0.0412
0.315	0.204	0.0412
0.315	0.194	0.0412
0.316	0.163	0.0412
0.316	0.251	0.0415
0.317	0.218	0.0413
0.317	0.243	0.042
0.318	0.216	0.0419
0.318	0.194	0.0414
0.319	0.2	0.0416
0.319	0.23	0.0422
0.32	0.204	0.0415
0.32	0.236	0.0418
0.321	0.206	0.0433
0.321	0.237	0.0419
0.322	0.259	0.0417
0.323	0.276	0.0417
0.323	0.193	0.0422
0.324	0.21	0.0421
0.324	0.269	0.0424
0.325	0.228	0.042
0.325	0.172	0.0417
0.326	0.197	0.0419
0.326	0.143	0.042
0.327	0.171	0.0421
0.327	0.198	0.0423
0.328	0.161	0.042
0.328	0.234	0.0423
0.329	0.202	0.0427
0.329	0.209	0.042
0.33	0.176	0.0414
0.33	0.165	0.0426
0.331	0.209	0.0418
0.331	0.186	0.0425
0.332	0.204	0.0425
0.332	0.158	0.0423
0.333	0.115	0.0421
0.333	0.192	0.0427
0.334	0.175	0.0431
0.334	0.224	0.0427
0.335	0.162	0.0428
0.335	0.137	0.0424
0.336	0.154	0.0434
0.336	0.22	0.0433
0.337	0.25	0.043
0.337	0.146	0.0429
0.338	0.187	0.0431
0.338	0.19	0.0425
0.339	0.23	0.0431
0.339	0.205	0.0433
0.34	0.204	0.0434
0.34	0.197	0.0429
0.341	0.161	0.0428
0.341	0.185	0.0428
0.342	0.199	0.0429
0.342	0.173	0.043
0.343	0.183	0.0432
0.343	0.132	0.0428
0.344	0.171	0.0428
0.344	0.16	0.0432
0.345	0.178	0.0433
0.345	0.22	0.0436
0.346	0.189	0.0432
0.346	0.173	0.0439
0.347	0.129	0.0431
0.347	0.159	0.0431
0.348	0.214	0.044
0.348	0.167	0.044
0.349	0.196	0.0436
0.349	0.187	0.0437
0.35	0.177	0.0437
0.35	0.165	0.0434
0.351	0.163	0.0432
0.351	0.161	0.0438
0.352	0.234	0.0439
0.352	0.226	0.0436
0.353	0.136	0.0431
0.353	0.166	0.0435
0.354	0.221	0.0436
0.354	0.166	0.0431
0.355	0.18	0.0431
0.355	0.172	0.042
0.356	0.169	0.042
0.356	0.106	0.0413
0.357	0.161	0.0411
0.357	0.126	0.041
0.358	0.164	0.0405
0.358	0.15	0.0409
0.359	0.139	0.0418
0.359	0.191	0.0415
0.36	0.12	0.0411
0.36	0.195	0.0419
0.361	0.162	0.0413
0.362	0.257	0.0419
0.362	0.208	0.0423
0.363	0.153	0.0423
0.363	0.198	0.0421
0.364	0.201	0.0417
0.364	0.168	0.0422
0.365	0.18	0.0424
0.365	0.17	0.0428
0.366	0.136	0.0426
0.366	0.2	0.043
0.367	0.132	0.0427
0.367	0.203	0.0429
0.368	0.129	0.0432
0.368	0.224	0.0431
0.369	0.189	0.0433
0.369	0.157	0.0436
0.37	0.201	0.044
0.37	0.145	0.0442
0.371	0.141	0.0446
0.371	0.224	0.045
0.372	0.225	0.0452
0.372	0.134	0.045
0.373	0.229	0.0451
0.373	0.198	0.0459
0.374	0.127	0.0452
0.374	0.147	0.0448
0.375	0.137	0.0452
0.375	0.125	0.0456
0.376	0.126	0.0461
0.376	0.163	0.045
0.377	0.155	0.0464
0.377	0.218	0.0456
0.378	0.241	0.0465
0.378	0.264	0.0474
0.379	0.123	0.047
0.379	0.165	0.0473
0.38	0.143	0.0467
0.38	0.17	0.0479
0.381	0.17	0.0479
0.381	0.135	0.0474
0.382	0.129	0.0474
0.382	0.225	0.0484
0.383	0.144	0.0483
0.383	0.211	0.0482
0.384	0.16	0.0488
0.384	0.0806	0.0492
0.385	0.162	0.0493
0.385	0.16	0.0495
0.386	0.184	0.0499
0.386	0.182	0.0496
0.387	0.143	0.0493
0.387	0.149	0.0501
0.388	0.202	0.0508
0.388	0.125	0.0504
0.389	0.252	0.0506
0.389	0.118	0.0515
0.39	0.101	0.0511
0.39	0.187	0.0515
0.391	0.197	0.0527
0.391	0.214	0.0516
0.392	0.101	0.0525
0.392	0.12	0.0527
0.393	0.158	0.0527
0.393	0.157	0.0528
0.394	0.104	0.053
0.394	0.201	0.0538
0.395	0.112	0.0531
0.395	0.0711	0.0538
0.396	0.266	0.0539
0.396	0.137	0.0554
0.397	0.158	0.0549
0.397	0.239	0.0555
0.398	0.0952	0.0539
0.398	0.0827	0.0557
0.399	0.137	0.055
0.399	0.164	0.0563
0.4	0.142	0.0563
0.401	0.124	0.0564
0.401	0.164	0.0564
0.402	0.222	0.0551
0.402	0.148	0.0562
0.403	0.225	0.0571
0.403	0.248	0.0577
0.404	0.172	0.0573
0.404	0.163	0.0573
0.405	0.142	0.0582
0.405	0.128	0.0584
0.406	0.207	0.0575
0.406	0.12	0.0574
0.407	0.131	0.059
0.407	0.0887	0.058
0.408	0.144	0.0587
0.408	0.222	0.0589
0.409	0.176	0.059
0.409	0.139	0.0583
0.41	0.258	0.0597
0.41	0.164	0.06
0.411	0.207	0.0596
0.411	0.0292	0.0593
0.412	0.155	0.0612
0.412	0.183	0.0599
0.413	0.142	0.0594
0.413	0.228	0.0596
0.414	0.109	0.0615
0.414	0.0644	0.0605
0.415	0.112	0.0606
0.415	0.122	0.0615
0.416	0.117	0.0631
0.416	0.0827	0.0598
0.417	0.206	0.0613
0.417	0.0524	0.0625
0.418	0.0592	0.0616
0.418	0.137	0.0611
0.419	0.103	0.0631
0.419	0.22	0.064
0.42	0.113	0.0628
0.42	0.117	0.0636
0.421	0.0805	0.0651
0.421	0.205	0.0647
0.422	0.0837	0.0624
0.422	0.122	0.0651
0.423	0.12	0.0664
0.423	0.0544	0.0642
0.424	0.109	0.0645
0.424	0.0288	0.0651
0.425	0.136	0.0687
0.425	0.228	0.0643
0.426	0.16	0.0677
0.426	0.152	0.0686
0.427	0.157	0.0703
0.427	-0.00496	0.0671
0.428	0.15	0.0699
0.428	0.159	0.0712
0.429	0.167	0.069
0.429	0.142	0.0686
0.43	0.246	0.0726
0.43	0.164	0.0739
0.431	0.0514	0.0706
0.431	0.154	0.0725
0.432	0.114	0.0747
0.432	0.0981	0.0733
0.433	0.167	0.0744
0.433	0.163	0.0749
0.434	0.123	0.0779
0.434	0.114	0.0743
0.435	0.191	0.0769
0.435	0.216	0.078
0.436	0.1	0.0786
0.436	0.158	0.0786
0.437	0.286	0.079
0.437	0.0922	0.0787
0.438	0.237	0.0808
0.438	0.0442	0.0813
0.439	0.118	0.0808
0.439	0.0134	0.0851
0.44	0.232	0.0841

## Sheet: 6G_Trehalose
Q	I(Q)	Error
0.0114	160.702	14.9301
0.01191	143.751	11.8201
0.01242	131.1	9.79299
0.01292	120.225	7.55071
0.01343	112.079	5.26857
0.01394	102.541	4.41081
0.01444	96.6103	2.87771
0.01495	89.5043	1.95393
0.01546	84.2102	1.42375
0.01596	79.6966	1.05582
0.01647	75.081	0.808836
0.01698	70.656	0.658629
0.01748	67.1156	0.542371
0.01799	63.6064	0.382029
0.0185	60.3598	0.306734
0.019	57.237	0.26117
0.01951	54.6255	0.210421
0.02002	52.1081	0.191746
0.02052	49.8016	0.169627
0.02103	47.2185	0.148841
0.02154	45.2431	0.138634
0.02204	43.3002	0.132078
0.02255	41.2704	0.119668
0.02306	39.6108	0.112584
0.02356	37.7062	0.10476
0.02407	36.355	0.102919
0.02458	34.7906	0.0955021
0.02509	33.4842	0.0914496
0.02559	32.361	0.0901371
0.0261	30.939	0.0843376
0.02661	29.9454	0.0831414
0.02711	28.8486	0.0812844
0.02762	27.8401	0.0785778
0.02813	26.8419	0.0752068
0.02863	25.8463	0.0748629
0.02914	25.177	0.0736621
0.02965	24.4177	0.0711094
0.03015	23.4847	0.0693635
0.03066	22.9111	0.0683553
0.03117	22.0852	0.0667206
0.03167	21.5307	0.0657828
0.03218	20.9854	0.0648036
0.03269	20.3166	0.0643335
0.03319	19.7284	0.0616682
0.0337	19.2629	0.0618496
0.03421	18.7032	0.0614371
0.03471	18.0751	0.0598128
0.03522	17.767	0.0583521
0.03573	17.196	0.058023
0.03623	16.7234	0.0572243
0.03674	16.1907	0.0569745
0.03725	15.7893	0.0552267
0.03775	15.445	0.0541085
0.03826	15.1352	0.0534917
0.03877	14.55	0.0528077
0.03927	14.3512	0.0526942
0.03978	13.8272	0.0523213
0.04029	13.5871	0.0506758
0.0408	13.2786	0.0510923
0.0413	12.8818	0.0506068
0.04181	12.7747	0.0498017
0.04232	12.4027	0.0493365
0.04282	12.0746	0.0489791
0.04333	11.8322	0.0478858
0.04384	11.6061	0.0475919
0.04434	11.2287	0.0475231
0.04485	11.1565	0.0469177
0.04536	10.908	0.0466222
0.04586	10.7071	0.0456746
0.04637	10.568	0.046062
0.04688	10.3422	0.0452897
0.04738	10.1776	0.044472
0.04789	9.93591	0.0441554
0.0484	9.66605	0.0444844
0.0489	9.5688	0.0433734
0.04941	9.413	0.0430804
0.04992	9.19419	0.0426781
0.05042	9.04682	0.0427044
0.05093	8.97956	0.0414787
0.05144	8.7091	0.0412014
0.05194	8.58645	0.0407947
0.05245	8.42819	0.0399385
0.05296	8.28886	0.0399114
0.05346	8.11152	0.0400371
0.05397	7.95751	0.0396503
0.05448	7.91424	0.0390361
0.05498	7.77173	0.0387192
0.05549	7.67029	0.0389342
0.056	7.52508	0.0384292
0.0565	7.36039	0.0383691
0.05701	7.20853	0.0379017
0.05752	7.16436	0.0374257
0.05803	7.095	0.0375237
0.05853	6.98697	0.0371925
0.05904	6.95118	0.0374527
0.05955	6.87523	0.036503
0.06005	6.82347	0.036369
0.06056	6.76879	0.0367263
0.06107	6.8385	0.0363926
0.06157	6.76827	0.0357281
0.06208	6.75188	0.0357938
0.06259	6.83295	0.036081
0.06309	6.87039	0.0357744
0.0636	6.86666	0.0356069
0.06411	6.92502	0.035422
0.06461	6.99721	0.0347968
0.06512	7.03222	0.0349725
0.06563	6.96584	0.0345797
0.06613	7.00888	0.0349071
0.06664	6.8475	0.0342975
0.06715	6.59098	0.0341655
0.06765	6.45736	0.0342135
0.06816	6.18008	0.0339573
0.06867	6.06526	0.0333332
0.06917	5.82396	0.033129
0.06968	5.59529	0.0331734
0.07019	5.36853	0.0325377
0.07069	5.26021	0.0323971
0.0712	5.11924	0.032411
0.07171	5.05579	0.0320904
0.07221	4.90333	0.031641
0.07272	4.73007	0.0319464
0.07323	4.63112	0.0315451
0.07373	4.57394	0.0312869
0.07424	4.53325	0.0309327
0.07475	4.45578	0.0315647
0.07526	4.31397	0.0306483
0.07576	4.2914	0.0304806
0.07627	4.21393	0.0303004
0.07678	4.09803	0.0301912
0.07728	4.11237	0.0301688
0.07779	4.00078	0.0301714
0.0783	3.97622	0.0298717
0.0788	3.94659	0.0301545
0.07931	3.84523	0.0298944
0.07982	3.78885	0.0305023
0.08032	3.74782	0.0303475
0.08083	3.68841	0.030197
0.08134	3.57308	0.0301181
0.08184	3.58993	0.0306129
0.08235	3.48314	0.030131
0.08286	3.43305	0.0303255
0.08336	3.42319	0.0305931
0.08387	3.35734	0.0301174
0.08438	3.32865	0.0300281
0.08488	3.27571	0.0300996
0.08539	3.24804	0.0303951
0.0859	3.2051	0.0299253
0.0864	3.16126	0.0297625
0.08691	3.1359	0.0304158
0.08742	3.06157	0.030096
0.08792	3.06498	0.029582
0.08843	3.06009	0.029682
0.08894	2.98599	0.0301217
0.08944	2.9344	0.0295566
0.08995	2.94822	0.0295809
0.09046	2.90242	0.02975
0.09096	2.8964	0.0294749
0.09147	2.81617	0.0289767
0.09198	2.85157	0.0287428
0.09248	2.79213	0.029102
0.09299	2.74063	0.028525
0.0935	2.72462	0.0285895
0.09401	2.74889	0.0293084
0.09451	2.59897	0.0290278
0.09502	2.64834	0.0288225
0.09553	2.59246	0.0287893
0.09603	2.59595	0.0291049
0.09654	2.58937	0.0287776
0.09705	2.56954	0.028963
0.09755	2.58021	0.0290944
0.09806	2.51477	0.0288737
0.09857	2.50781	0.0286985
0.09907	2.42526	0.0286545
0.09958	2.38799	0.0287062
0.10009	2.43354	0.0283338
0.10059	2.43246	0.0283484
0.1011	2.37833	0.0290459
0.10161	2.34396	0.0287465
0.10211	2.28169	0.0286993
0.10262	2.26203	0.028871
0.10313	2.25246	0.0289927
0.10363	2.24077	0.0280334
0.10414	2.17175	0.0279485
0.10465	2.15003	0.0279696
0.10515	2.14061	0.0272953
0.10566	2.08976	0.0274931
0.10617	2.10182	0.0278716
0.10667	2.10913	0.0274741
0.10718	2.06565	0.0273103
0.10769	2.06151	0.0269986
0.10819	1.99512	0.027156
0.1087	2.01826	0.0264898
0.10921	1.9608	0.02647
0.10971	1.93197	0.0264928
0.11022	1.91404	0.026045
0.11073	1.94787	0.0259143
0.11123	1.89436	0.0257463
0.11174	1.92965	0.0259177
0.11225	1.87359	0.0254706
0.11275	1.85691	0.0255365
0.11326	1.85248	0.0255205
0.11377	1.81653	0.0252845
0.11428	1.77271	0.0250123
0.11478	1.75745	0.0249964
0.11529	1.76033	0.0248261
0.1158	1.77363	0.0247112
0.1163	1.71745	0.0247533
0.11681	1.74627	0.0246801
0.11732	1.68636	0.0243926
0.11782	1.73028	0.0244968
0.11833	1.67207	0.0242004
0.11884	1.63112	0.0244046
0.11934	1.64142	0.0241188
0.11985	1.62336	0.0238807
0.12036	1.63592	0.0240427
0.12086	1.64817	0.0237112
0.12137	1.55773	0.0237838
0.12188	1.55776	0.0237018
0.12238	1.57841	0.0234723
0.12289	1.55488	0.0235334
0.1234	1.55356	0.0234499
0.1239	1.54238	0.0235216
0.12441	1.51018	0.0230998
0.12492	1.5023	0.0231245
0.12542	1.47877	0.0233084
0.12593	1.50139	0.0230895
0.12644	1.49051	0.0227577
0.12694	1.44241	0.0225776
0.12745	1.42782	0.0228393
0.12796	1.43666	0.0225891
0.12846	1.39813	0.0226306
0.12897	1.41576	0.0224165
0.12948	1.38095	0.0222758
0.12998	1.38778	0.0221997
0.13049	1.36625	0.0222451
0.131	1.35825	0.0222615
0.1315	1.3619	0.0221239
0.13201	1.34035	0.0219669
0.13252	1.34934	0.0218918
0.13302	1.38245	0.0218297
0.13353	1.32137	0.021571
0.13404	1.31123	0.0215492
0.13454	1.29143	0.021653
0.13505	1.27957	0.0214921
0.13556	1.28782	0.0214516
0.13606	1.30327	0.0215425
0.13657	1.27797	0.0214015
0.13708	1.25749	0.0214289
0.13758	1.22407	0.0211892
0.13809	1.26155	0.0212801
0.1386	1.21957	0.0210896
0.13911	1.20386	0.0210288
0.13961	1.21162	0.0210977
0.14012	1.18988	0.0210881
0.14063	1.22547	0.0207541
0.14113	1.20705	0.0207825
0.14164	1.19157	0.0206654
0.14215	1.16358	0.0207973
0.14265	1.18353	0.0207437
0.14316	1.14455	0.0206953
0.14367	1.14142	0.02058
0.14417	1.13461	0.0205413
0.14468	1.13547	0.0204782
0.14519	1.11645	0.0205114
0.14569	1.09547	0.0204921
0.1462	1.08465	0.0202704
0.14671	1.10111	0.0203912
0.14721	1.06638	0.0202818
0.14772	1.06565	0.0202648
0.14823	1.09204	0.0201853
0.14873	1.04377	0.0200786
0.14924	1.0498	0.020107
0.14975	1.04226	0.0200789
0.15025	1.07298	0.0200648
0.15076	1.02216	0.0199739
0.15127	1.05083	0.0198706
0.15177	1.00674	0.0198739
0.15228	1.01547	0.0199103
0.15279	0.996969	0.0197188
0.15329	0.996355	0.0195485
0.1538	0.991292	0.0197068
0.15431	0.975431	0.0195328
0.15481	1.01579	0.0196377
0.15532	0.947746	0.0194165
0.15583	0.974925	0.0194786
0.15633	0.946221	0.0194323
0.15684	0.958797	0.0193184
0.15735	0.954151	0.0194742
0.15785	0.940335	0.0193041
0.15836	0.929266	0.019044
0.15887	0.949445	0.0191418
0.15937	0.939626	0.0191425
0.15988	0.948026	0.0190321
0.16039	0.951339	0.0189679
0.16089	0.916946	0.0190824
0.1614	0.903112	0.0189663
0.16191	0.883901	0.0189186
0.16241	0.938442	0.0188998
0.16292	0.914252	0.0189343
0.16343	0.898354	0.0187761
0.16393	0.853145	0.0186151
0.16444	0.839463	0.0188485
0.16495	0.865611	0.0186952
0.16545	0.851327	0.0185457
0.16596	0.852719	0.0185985
0.16647	0.844128	0.0186368
0.16697	0.850398	0.0184413
0.16748	0.858783	0.018707
0.16799	0.851658	0.018724
0.16849	0.839932	0.0187563
0.169	0.852909	0.0188054
0.16951	0.81625	0.0188736
0.17001	0.818213	0.0189703
0.17052	0.829232	0.0187659
0.17103	0.806524	0.0188895
0.17153	0.819484	0.0190487
0.17204	0.797641	0.0189499
0.17255	0.802658	0.018875
0.17305	0.790437	0.0189878
0.17356	0.810991	0.019132
0.17407	0.777173	0.018944
0.17457	0.762481	0.019037
0.17508	0.781805	0.0190594
0.17559	0.765964	0.0189563
0.1761	0.793589	0.0189042
0.1766	0.795777	0.0189884
0.17711	0.761449	0.01912
0.17762	0.760434	0.018838
0.17812	0.741117	0.0189415
0.17863	0.751488	0.0190905
0.17914	0.748099	0.0188928
0.17964	0.726879	0.0187468
0.18015	0.709058	0.0188076
0.18066	0.736926	0.0189279
0.18116	0.722695	0.0186711
0.18167	0.728528	0.0190196
0.18218	0.742059	0.0193231
0.18268	0.710618	0.0192637
0.18319	0.740546	0.0193083
0.1837	0.699825	0.0194179
0.1842	0.717459	0.0194667
0.18471	0.699948	0.0193648
0.18522	0.718752	0.019505
0.18572	0.717036	0.0195631
0.18623	0.699983	0.01963
0.18674	0.692717	0.0197122
0.18724	0.719368	0.0198173
0.18775	0.718322	0.0199901
0.18826	0.659321	0.0196872
0.18876	0.697593	0.0197667
0.18927	0.663102	0.0199446
0.18978	0.705357	0.0199789
0.19028	0.664086	0.0200175
0.19079	0.669423	0.019933
0.1913	0.650814	0.0201266
0.1918	0.735378	0.0199476
0.19231	0.674925	0.0199993
0.19282	0.667241	0.0201092
0.19332	0.692018	0.0201307
0.19383	0.667218	0.0200469
0.19434	0.66947	0.0201442
0.19484	0.614689	0.0201834
0.19535	0.613223	0.0200065
0.19586	0.660895	0.0201799
0.19636	0.643611	0.0203007
0.19687	0.64871	0.0202243
0.19738	0.650341	0.020139
0.19788	0.650107	0.0201997
0.19839	0.655452	0.0203405
0.1989	0.646379	0.0202296
0.1994	0.626368	0.0201484
0.19991	0.600441	0.0204201
0.20042	0.602347	0.0202993
0.20092	0.631954	0.0202127
0.20143	0.613574	0.0203394
0.20194	0.614079	0.0204595
0.20244	0.603071	0.0202707
0.20295	0.638784	0.0203433
0.20346	0.623468	0.0205632
0.20396	0.628933	0.0203412
0.20447	0.611567	0.0202219
0.20498	0.603613	0.0203913
0.20548	0.586703	0.0203677
0.20599	0.589234	0.0202466
0.2065	0.615879	0.0202424
0.207	0.600746	0.0204951
0.20751	0.566054	0.0203242
0.20802	0.575064	0.0202012
0.20852	0.579562	0.0204632
0.20903	0.564772	0.0204731
0.20954	0.607105	0.0200846
0.21004	0.580861	0.0200824
0.21055	0.601931	0.020364
0.21106	0.562639	0.020208
0.21156	0.546786	0.0201162
0.21207	0.549695	0.0202426
0.21258	0.560108	0.0204663
0.21308	0.581255	0.0201934
0.21359	0.569319	0.0201658
0.2141	0.541651	0.0203847
0.2146	0.581564	0.0202137
0.21511	0.56949	0.0201763
0.21562	0.56958	0.0202849
0.21612	0.557707	0.020331
0.21663	0.555066	0.0199369
0.21714	0.589817	0.020064
0.21764	0.582988	0.0203267
0.21815	0.528173	0.0200376
0.21866	0.566045	0.0199081
0.21916	0.516171	0.0201006
0.21967	0.526382	0.0200961
0.22018	0.549963	0.019839
0.22068	0.509962	0.0198825
0.22119	0.515597	0.0201318
0.2217	0.579088	0.0198229
0.2222	0.52084	0.0196811
0.22271	0.545599	0.0197559
0.22322	0.515615	0.0199185
0.22372	0.52214	0.0196013
0.22423	0.544864	0.0195893
0.22474	0.504901	0.0197626
0.22524	0.561411	0.0194749
0.22575	0.522124	0.0194023
0.22626	0.515218	0.0195095
0.22676	0.521793	0.019502
0.22727	0.534979	0.0192238
0.22778	0.515348	0.0192765
0.22828	0.492818	0.0193268
0.22879	0.516901	0.0191108
0.2293	0.513997	0.0190012
0.2298	0.520877	0.0191438
0.23031	0.519709	0.019069
0.23082	0.489392	0.0187196
0.23132	0.477648	0.0187953
0.23183	0.513524	0.0189734
0.23234	0.501184	0.018706
0.23284	0.506137	0.0187978
0.23335	0.511306	0.0187054
0.23386	0.478313	0.0188025
0.23436	0.490227	0.0184853
0.23487	0.51286	0.0182921
0.23538	0.490566	0.0184388
0.23588	0.485671	0.0182638
0.23639	0.484758	0.01825
0.2369	0.474812	0.0183406
0.2374	0.485039	0.0183962
0.23791	0.473356	0.0181348
0.23842	0.490857	0.0181626
0.23892	0.487798	0.0182626
0.23943	0.473726	0.0181596
0.23994	0.46665	0.0180722
0.24044	0.482296	0.0180753
0.24095	0.474907	0.0180652
0.24145	0.471191	0.0179433
0.24196	0.44369	0.017904
0.24247	0.465434	0.0180405
0.24297	0.443969	0.0177504
0.24348	0.477086	0.0178379
0.24399	0.442162	0.0178143
0.24449	0.461857	0.0177054
0.245	0.492139	0.0177035
0.24551	0.454012	0.0176521
0.24601	0.493864	0.017722
0.24652	0.462365	0.0175317
0.24703	0.453953	0.0174921
0.24753	0.46815	0.0175245
0.24804	0.451318	0.0175184
0.24855	0.455572	0.0173877
0.24905	0.44981	0.0175227
0.24956	0.458229	0.0174392
0.25007	0.446681	0.0172604
0.25057	0.45854	0.0173141
0.25108	0.464905	0.0172537
0.25159	0.433056	0.017313
0.25209	0.450186	0.0171628
0.2526	0.467086	0.0171916
0.25311	0.438253	0.0171903
0.25361	0.45755	0.017055
0.25412	0.4269	0.0170621
0.25463	0.42426	0.0171081
0.25513	0.423407	0.0170401
0.25564	0.453962	0.0169246
0.25615	0.447165	0.0168573
0.25665	0.437988	0.016822
0.25716	0.44905	0.0167905
0.25767	0.415063	0.0166601
0.25817	0.457064	0.0167672
0.25868	0.438032	0.0166684
0.25919	0.423759	0.0166031
0.25969	0.453388	0.0166728
0.2602	0.412168	0.0165151
0.26071	0.427841	0.0164636
0.26121	0.429015	0.0164432
0.26172	0.438424	0.0164868
0.26223	0.428478	0.0164522
0.26273	0.439692	0.0164099
0.26324	0.428902	0.0163485
0.26375	0.44675	0.0163218
0.26425	0.415194	0.0163519
0.26476	0.444311	0.0163196
0.26527	0.405696	0.016298
0.26577	0.419661	0.0163129
0.26628	0.384649	0.0162219
0.26679	0.413847	0.0161821
0.26729	0.401483	0.016171
0.2678	0.416178	0.0161947
0.26831	0.411923	0.0161136
0.26881	0.417844	0.0160595
0.26932	0.448194	0.0160783
0.26983	0.40021	0.0160226
0.27033	0.414583	0.016039
0.27084	0.418631	0.0160121
0.27134	0.426454	0.0159745
0.27185	0.402918	0.0158724
0.27236	0.382382	0.0158935
0.27286	0.392965	0.0159317
0.27337	0.405786	0.0159336
0.27388	0.392326	0.0157375
0.27438	0.382267	0.0158136
0.27489	0.408472	0.0157793
0.2754	0.401172	0.0156964
0.2759	0.402615	0.0156868
0.27641	0.409029	0.0157145
0.27692	0.389349	0.0157271
0.27742	0.393421	0.0155953
0.27793	0.407615	0.0156312
0.27844	0.391962	0.0156325
0.27894	0.399965	0.0155799
0.27945	0.398442	0.0156066
0.27996	0.420648	0.0156977
0.28046	0.397773	0.015556
0.28097	0.418806	0.015467
0.28148	0.409761	0.0154832
0.28198	0.399528	0.01552
0.28249	0.391954	0.0154214
0.283	0.386555	0.0154205
0.2835	0.379106	0.015484
0.28401	0.388747	0.0154187
0.28452	0.359846	0.0154462
0.28502	0.393027	0.0154009
0.28553	0.398041	0.0154247
0.28604	0.349212	0.0152792
0.28654	0.377252	0.0153075
0.28705	0.38517	0.015412
0.28756	0.376	0.0153117
0.28806	0.375214	0.0152797
0.28857	0.394997	0.0154032
0.28908	0.378383	0.0153851
0.28958	0.374073	0.0153343
0.29009	0.385986	0.0153008
0.29059	0.372298	0.0153222
0.2911	0.374548	0.0153278
0.29161	0.385991	0.0153546
0.29211	0.397154	0.0153976
0.29262	0.382342	0.0153869
0.29313	0.38332	0.0152709
0.29363	0.394115	0.0153809
0.29414	0.370415	0.0154054
0.29465	0.354402	0.0152816
0.29515	0.356105	0.0152751
0.29566	0.365289	0.0152736
0.29617	0.372644	0.0153321
0.29667	0.384144	0.0152201
0.29718	0.386147	0.0152867
0.29769	0.366428	0.0153209
0.29819	0.392957	0.0153176
0.2987	0.365084	0.0151842
0.29921	0.363018	0.0152684
0.29971	0.380595	0.0152364
0.30022	0.386693	0.0151766
0.30073	0.342547	0.0151931
0.30123	0.35741	0.0152172
0.30174	0.372047	0.0152288
0.30225	0.335827	0.0151344
0.30275	0.360094	0.0151402
0.30326	0.365022	0.015183
0.30377	0.350022	0.0150995
0.30427	0.360121	0.0150319
0.30478	0.35851	0.0149966
0.30529	0.35398	0.0151454
0.30579	0.356999	0.0150075
0.3063	0.346845	0.0148847
0.3068	0.352056	0.0149988
0.30731	0.367655	0.015102
0.30782	0.365267	0.015098
0.30832	0.35444	0.0151818
0.30883	0.390877	0.0152794
0.30934	0.343372	0.0151294
0.30984	0.347815	0.0151857
0.31035	0.348353	0.0153249
0.31086	0.361185	0.0152772
0.31136	0.328524	0.015364
0.31187	0.356009	0.0154691
0.31238	0.339169	0.0157015
0.31288	0.3657	0.0156679
0.31339	0.357973	0.0157437
0.3139	0.34516	0.015812
0.3144	0.353307	0.0158692
0.31491	0.341171	0.0158857
0.31542	0.346128	0.0158987
0.31592	0.335598	0.0160551
0.31643	0.340185	0.0159906
0.31694	0.332055	0.0159752
0.31744	0.340381	0.0160964
0.31795	0.348607	0.0161973
0.31845	0.32636	0.0160814
0.31896	0.333815	0.0160718
0.31947	0.344555	0.0162836
0.31997	0.342194	0.016179
0.32048	0.348067	0.0161805
0.32099	0.35426	0.0163511
0.32149	0.336754	0.0162222
0.322	0.33143	0.0161296
0.32251	0.319848	0.0160974
0.32301	0.331734	0.0162548
0.32352	0.352854	0.0162284
0.32403	0.338512	0.0161721
0.32453	0.320279	0.0161301
0.32504	0.35208	0.0161954
0.32555	0.319494	0.0160962
0.32605	0.3307	0.0161969
0.32656	0.35076	0.0161418
0.32707	0.354253	0.01628
0.32757	0.338367	0.0161598
0.32808	0.341171	0.0162325
0.32859	0.323511	0.0163661
0.32909	0.34503	0.0162243
0.3296	0.354203	0.0162888
0.3301	0.31009	0.0163806
0.33061	0.319901	0.0162909
0.33112	0.338223	0.0163049
0.33162	0.333175	0.0164044
0.33213	0.323047	0.0164095
0.33264	0.338386	0.0164007
0.33314	0.324597	0.0163592
0.33365	0.355752	0.0164635
0.33416	0.349968	0.0164494
0.33466	0.334893	0.016384
0.33517	0.305826	0.0164402
0.33568	0.301743	0.0165111
0.33618	0.308204	0.0165121
0.33669	0.330305	0.0164429
0.3372	0.323102	0.0164318
0.3377	0.327082	0.0165639
0.33821	0.337201	0.0164829
0.33872	0.305806	0.0164469
0.33922	0.298234	0.016631
0.33973	0.326282	0.0164858
0.34023	0.311904	0.0164806
0.34074	0.326906	0.0165392
0.34125	0.308339	0.0166306
0.34175	0.323697	0.0164784
0.34226	0.330321	0.0165763
0.34277	0.3404	0.0166949
0.34327	0.333962	0.0166026
0.34378	0.334811	0.0164865
0.34429	0.316631	0.0165931
0.34479	0.32852	0.0166789
0.3453	0.340214	0.0165378
0.34581	0.310295	0.0165659
0.34631	0.325531	0.0167442
0.34682	0.324079	0.0166638
0.34733	0.299504	0.0166974
0.34783	0.309765	0.0167439
0.34834	0.301727	0.0168472
0.34884	0.301395	0.016589
0.34935	0.322545	0.0166493
0.34986	0.277441	0.0167199
0.35036	0.313543	0.0167014
0.35087	0.329744	0.0165399
0.35138	0.300326	0.0166714
0.35188	0.315067	0.0167378
0.35239	0.284804	0.016572
0.3529	0.29486	0.0165326
0.3534	0.313335	0.0166495
0.35391	0.313385	0.0167065
0.35442	0.322729	0.0164884
0.35492	0.325643	0.0162592
0.35543	0.289039	0.0161545
0.35594	0.297536	0.0160987
0.35644	0.321022	0.0158229
0.35695	0.304411	0.0158952
0.35745	0.294104	0.015806
0.35796	0.295728	0.0154526
0.35847	0.318496	0.0157051
0.35897	0.300678	0.0159209
0.35948	0.309646	0.015907
0.35999	0.305672	0.0158697
0.36049	0.285331	0.0159874
0.361	0.28722	0.0161226
0.36151	0.290047	0.0159719
0.36201	0.289208	0.0160484
0.36252	0.321703	0.016277
0.36303	0.3062	0.0161876
0.36353	0.31892	0.0160388
0.36404	0.306658	0.0162955
0.36455	0.297994	0.0163702
0.36505	0.33519	0.0162422
0.36556	0.297272	0.0162885
0.36606	0.321628	0.0163695
0.36657	0.290379	0.0164391
0.36708	0.296459	0.0163011
0.36758	0.281111	0.0165477
0.36809	0.308659	0.0165806
0.3686	0.285283	0.0165987
0.3691	0.313335	0.0168179
0.36961	0.29724	0.0170049
0.37012	0.29526	0.0171621
0.37062	0.354111	0.0171859
0.37113	0.301543	0.0172989
0.37164	0.290184	0.0174367
0.37214	0.277568	0.0172533
0.37265	0.304838	0.0172466
0.37315	0.314856	0.0173194
0.37366	0.2902	0.0171956
0.37417	0.291527	0.0171299
0.37467	0.300932	0.0172563
0.37518	0.285607	0.0175405
0.37569	0.265915	0.017486
0.37619	0.280398	0.0174073
0.3767	0.321063	0.0175448
0.37721	0.276014	0.0177705
0.37771	0.280675	0.0176707
0.37822	0.314662	0.0177782
0.37873	0.303922	0.0179722
0.37923	0.283711	0.0179904
0.37974	0.261659	0.0178907
0.38024	0.302117	0.0181887
0.38075	0.305205	0.0181964
0.38126	0.296546	0.018131
0.38176	0.305936	0.0182325
0.38227	0.303767	0.0184416
0.38278	0.287145	0.0186184
0.38328	0.283275	0.0183405
0.38379	0.303013	0.0184944
0.3843	0.313832	0.0187053
0.3848	0.291859	0.018812
0.38531	0.268266	0.0186879
0.38582	0.309678	0.018938
0.38632	0.29546	0.018936
0.38683	0.305784	0.0190171
0.38733	0.277973	0.0190347
0.38784	0.309512	0.0191249
0.38835	0.28441	0.0193209
0.38885	0.270265	0.0191428
0.38936	0.28801	0.0194288
0.38987	0.318413	0.0193645
0.39037	0.263245	0.0195151
0.39088	0.249152	0.0195339
0.39139	0.306437	0.0196421
0.39189	0.307903	0.0199072
0.3924	0.317157	0.0199712
0.3929	0.299861	0.0199103
0.39341	0.284065	0.0199408
0.39392	0.266996	0.0203487
0.39442	0.287043	0.0200841
0.39493	0.270437	0.0202762
0.39544	0.287652	0.0204237
0.39594	0.273022	0.020459
0.39645	0.286303	0.0213889
0.39696	0.330076	0.020659
0.39746	0.246069	0.0207855
0.39797	0.277938	0.0205849
0.39847	0.269168	0.0209711
0.39898	0.292994	0.0210655
0.39949	0.294466	0.021042
0.39999	0.276115	0.020986
0.4005	0.28989	0.0213182
0.40101	0.255637	0.0215499
0.40151	0.294727	0.0213408
0.40202	0.308948	0.0215756
0.40253	0.282962	0.0216246
0.40303	0.2931	0.0218754
0.40354	0.2584	0.0215311
0.40405	0.263505	0.0217843
0.40455	0.255926	0.0218944
0.40506	0.306238	0.0219485
0.40556	0.251578	0.021875
0.40607	0.284167	0.0220538
0.40658	0.253794	0.0222791
0.40708	0.269437	0.0219582
0.40759	0.262365	0.0220169
0.4081	0.284442	0.0225282
0.4086	0.242812	0.0222341
0.40911	0.298395	0.02212
0.40962	0.322918	0.0223061
0.41012	0.31755	0.02275
0.41063	0.293882	0.0222435
0.41113	0.26764	0.0223701
0.41164	0.283027	0.022906
0.41215	0.268347	0.0227143
0.41265	0.295078	0.0223482
0.41316	0.251843	0.0228111
0.41367	0.272835	0.0230465
0.41417	0.274727	0.0228458
0.41468	0.259284	0.0229021
0.41518	0.296943	0.0231805
0.41569	0.269908	0.0233158
0.4162	0.285463	0.0228893
0.4167	0.281456	0.0232293
0.41721	0.270395	0.0236262
0.41772	0.231953	0.0233379
0.41822	0.223604	0.0232769
0.41873	0.25409	0.0234362
0.41924	0.286266	0.0239881
0.41974	0.264123	0.0235943
0.42025	0.26663	0.0236772
0.42075	0.27864	0.0242423
0.42126	0.250191	0.0241255
0.42177	0.258096	0.0238567
0.42227	0.264873	0.0243171
0.42278	0.271487	0.0246981
0.42329	0.275545	0.0244828
0.42379	0.268401	0.0243769
0.4243	0.305671	0.0249709
0.42481	0.273238	0.0255603
0.42531	0.286265	0.024758
0.42582	0.284421	0.0252168
0.42632	0.24471	0.0258655
0.42683	0.303016	0.0255875
0.42734	0.25619	0.0255211
0.42784	0.255545	0.0258599
0.42835	0.270682	0.0264865
0.42886	0.273486	0.02628
0.42936	0.264235	0.026219
0.42987	0.277022	0.0268735
0.43037	0.309801	0.0273332
0.43088	0.262364	0.0266926
0.43139	0.28546	0.0270789
0.43189	0.240987	0.0281349
0.4324	0.252595	0.0276394
0.43291	0.273012	0.0276106
0.43341	0.296719	0.0280852
0.43392	0.236843	0.0288439
0.43443	0.276508	0.028154
0.43493	0.265163	0.0286787
0.43544	0.258057	0.029287
0.43594	0.30784	0.0294669
0.43645	0.281489	0.0293147
0.43696	0.221554	0.0296589
0.43746	0.221835	0.0302678
0.43797	0.336064	0.0300901
0.43848	0.252805	0.0303661
0.43898	0.266737	0.0306224
0.43949	0.235133	0.0314237
0.43999	0.246197	0.0310672

## Sheet: 6G_Sucrose
Q	I(Q)	Error
0.0114	50.1278	11.0918
0.01191	45.4671	8.78142
0.01242	43.9089	7.29712
0.01292	40.2817	5.62462
0.01343	38.3275	3.90821
0.01394	35.4545	3.26964
0.01444	33.0403	2.12879
0.01495	31.3206	1.44618
0.01546	30.2159	1.05658
0.01596	29.1337	0.774657
0.01647	28.0174	0.594609
0.01698	26.8257	0.485105
0.01748	25.737	0.391504
0.01799	24.6055	0.27521
0.0185	23.783	0.21495
0.019	22.919	0.182443
0.01951	22.0571	0.142939
0.02002	21.3906	0.130748
0.02052	20.8756	0.112517
0.02103	20.0786	0.0979151
0.02154	19.4578	0.0904854
0.02204	18.8317	0.0868054
0.02255	18.3474	0.0784366
0.02306	17.7979	0.0725542
0.02356	17.156	0.0679094
0.02407	16.6609	0.065801
0.02458	16.2839	0.061157
0.02509	15.8465	0.0588079
0.02559	15.482	0.0576149
0.0261	14.9496	0.0539316
0.02661	14.6486	0.0533689
0.02711	14.2217	0.0528375
0.02762	13.9666	0.0512675
0.02813	13.6738	0.0492808
0.02863	13.3065	0.0488679
0.02914	12.9858	0.0482665
0.02965	12.7393	0.0472588
0.03015	12.3652	0.0459249
0.03066	12.127	0.0452899
0.03117	11.9144	0.0442297
0.03167	11.6065	0.0437432
0.03218	11.334	0.0429607
0.03269	11.0781	0.0429491
0.03319	10.7871	0.0410896
0.0337	10.6385	0.0415157
0.03421	10.3959	0.0413903
0.03471	10.1534	0.0404522
0.03522	9.88706	0.0394169
0.03573	9.75914	0.0394955
0.03623	9.45594	0.0391979
0.03674	9.33718	0.0383896
0.03725	9.07365	0.0377507
0.03775	8.88381	0.0368247
0.03826	8.6418	0.0364774
0.03877	8.48952	0.0359608
0.03927	8.30004	0.0359368
0.03978	8.10502	0.0360237
0.04029	7.9756	0.0348532
0.0408	7.75195	0.0348934
0.0413	7.59554	0.0350703
0.04181	7.43511	0.034356
0.04232	7.26914	0.0339681
0.04282	7.12266	0.0335961
0.04333	7.01089	0.0333786
0.04384	6.85562	0.0327559
0.04434	6.7382	0.0328342
0.04485	6.57343	0.0324901
0.04536	6.46317	0.0321627
0.04586	6.40349	0.0316672
0.04637	6.2567	0.0320809
0.04688	6.14123	0.0314899
0.04738	6.04176	0.0307896
0.04789	5.92331	0.0308699
0.0484	5.77687	0.0309481
0.0489	5.69999	0.0303404
0.04941	5.59638	0.0301547
0.04992	5.47695	0.0297892
0.05042	5.48137	0.0297475
0.05093	5.30603	0.0290731
0.05144	5.23318	0.0290648
0.05194	5.13392	0.028712
0.05245	5.02734	0.027979
0.05296	4.98189	0.0279451
0.05346	4.95293	0.0279212
0.05397	4.84197	0.0278514
0.05448	4.75655	0.0271817
0.05498	4.69974	0.0270057
0.05549	4.60198	0.027373
0.056	4.50058	0.0269124
0.0565	4.47257	0.0268446
0.05701	4.39569	0.026684
0.05752	4.34454	0.0264729
0.05803	4.30166	0.0264068
0.05853	4.1961	0.0262354
0.05904	4.17382	0.0264229
0.05955	4.1322	0.0255836
0.06005	4.11134	0.0258056
0.06056	4.04561	0.0257854
0.06107	4.06409	0.0256905
0.06157	4.02727	0.0252748
0.06208	4.02733	0.0253046
0.06259	4.00205	0.0252686
0.06309	3.99952	0.0249588
0.0636	4.00091	0.024875
0.06411	3.98384	0.0249429
0.06461	4.04615	0.0244396
0.06512	3.95421	0.0246743
0.06563	3.9696	0.0243306
0.06613	3.95109	0.0244429
0.06664	3.86026	0.023922
0.06715	3.82972	0.0239413
0.06765	3.73472	0.0238935
0.06816	3.65751	0.0237163
0.06867	3.58491	0.0235396
0.06917	3.49539	0.0233754
0.06968	3.35316	0.0234622
0.07019	3.30614	0.023146
0.07069	3.201	0.0229229
0.0712	3.15597	0.0230987
0.07171	3.11315	0.0227687
0.07221	3.04698	0.0225806
0.07272	3.02819	0.0227893
0.07323	2.96773	0.0225228
0.07373	2.88393	0.0222472
0.07424	2.86319	0.0221262
0.07475	2.80799	0.0223571
0.07526	2.75381	0.0219399
0.07576	2.76941	0.0217991
0.07627	2.70636	0.0216762
0.07678	2.65412	0.0217214
0.07728	2.60642	0.0214917
0.07779	2.60963	0.021552
0.0783	2.56895	0.02146
0.0788	2.54871	0.02157
0.07931	2.48724	0.021496
0.07982	2.49039	0.0218965
0.08032	2.4839	0.0217923
0.08083	2.4145	0.021693
0.08134	2.4187	0.0217556
0.08184	2.39022	0.0219769
0.08235	2.35542	0.0216845
0.08286	2.33499	0.0217384
0.08336	2.27294	0.0221107
0.08387	2.2733	0.0217033
0.08438	2.25439	0.021637
0.08488	2.22922	0.0216921
0.08539	2.21906	0.0218874
0.0859	2.15569	0.021558
0.0864	2.18145	0.0215132
0.08691	2.10693	0.0218262
0.08742	2.08619	0.0215614
0.08792	2.09324	0.0214396
0.08843	2.10429	0.0214174
0.08894	2.01478	0.0217163
0.08944	2.0101	0.021396
0.08995	1.97955	0.0213579
0.09046	1.96937	0.0215811
0.09096	1.97943	0.021341
0.09147	1.93672	0.0209857
0.09198	1.92371	0.0208223
0.09248	1.86047	0.0209847
0.09299	1.89064	0.0206761
0.0935	1.84398	0.0208761
0.09401	1.84268	0.0210975
0.09451	1.8452	0.02097
0.09502	1.78646	0.0210042
0.09553	1.7901	0.0208562
0.09603	1.75816	0.0210857
0.09654	1.79047	0.020864
0.09705	1.74207	0.0208946
0.09755	1.73962	0.0209915
0.09806	1.69301	0.0208236
0.09857	1.70646	0.0208086
0.09907	1.71567	0.0208368
0.09958	1.65199	0.0208728
0.10009	1.65333	0.0205063
0.10059	1.64211	0.0206675
0.1011	1.61646	0.0210285
0.10161	1.61855	0.0207591
0.10211	1.5758	0.0208839
0.10262	1.59171	0.0210739
0.10313	1.57002	0.0210473
0.10363	1.55176	0.0204343
0.10414	1.53381	0.0202399
0.10465	1.51732	0.0203227
0.10515	1.51119	0.0199253
0.10566	1.46352	0.019969
0.10617	1.45764	0.0203422
0.10667	1.47134	0.0200034
0.10718	1.4852	0.0198347
0.10769	1.45841	0.019639
0.10819	1.45237	0.0197077
0.1087	1.44093	0.0192319
0.10921	1.4035	0.0193282
0.10971	1.38536	0.0192265
0.11022	1.38456	0.0188909
0.11073	1.37887	0.0188294
0.11123	1.36391	0.0188212
0.11174	1.34891	0.018827
0.11225	1.32872	0.0186156
0.11275	1.32905	0.0184567
0.11326	1.29732	0.0186503
0.11377	1.32218	0.0184127
0.11428	1.31443	0.0181514
0.11478	1.29673	0.018276
0.11529	1.27791	0.0181853
0.1158	1.26696	0.0179843
0.1163	1.25025	0.0179886
0.11681	1.26126	0.0180861
0.11732	1.24174	0.0177155
0.11782	1.23607	0.0179053
0.11833	1.22352	0.0176657
0.11884	1.2395	0.0178266
0.11934	1.23105	0.0175887
0.11985	1.19244	0.0174606
0.12036	1.20499	0.0175398
0.12086	1.17963	0.017346
0.12137	1.17694	0.0173624
0.12188	1.15969	0.0173534
0.12238	1.14484	0.0172209
0.12289	1.13472	0.0171525
0.1234	1.11925	0.0171892
0.1239	1.13321	0.0171677
0.12441	1.1599	0.0168537
0.12492	1.11978	0.0169576
0.12542	1.11096	0.0169366
0.12593	1.08889	0.0168618
0.12644	1.10659	0.0165861
0.12694	1.09456	0.0165169
0.12745	1.06204	0.0166873
0.12796	1.08338	0.0164487
0.12846	1.05899	0.0165238
0.12897	1.08014	0.0163777
0.12948	1.07043	0.0162522
0.12998	1.04963	0.0162294
0.13049	1.04618	0.0162842
0.131	1.03883	0.0163043
0.1315	1.02468	0.0161093
0.13201	1.02248	0.0160911
0.13252	1.00124	0.016031
0.13302	1.01298	0.015969
0.13353	1.03294	0.015862
0.13404	0.992943	0.0158116
0.13454	1.00915	0.0158637
0.13505	0.994084	0.015787
0.13556	0.985814	0.0157816
0.13606	0.954634	0.0156601
0.13657	0.960904	0.015624
0.13708	0.969676	0.0157445
0.13758	0.952819	0.0155767
0.13809	0.925445	0.0155913
0.1386	0.941829	0.0154529
0.13911	0.920025	0.0154544
0.13961	0.895408	0.0154708
0.14012	0.894117	0.015432
0.14063	0.915492	0.0152488
0.14113	0.928162	0.0152332
0.14164	0.892389	0.0151581
0.14215	0.886977	0.0152364
0.14265	0.867939	0.0151798
0.14316	0.905584	0.0151406
0.14367	0.889338	0.0151257
0.14417	0.884402	0.0150609
0.14468	0.869397	0.0149926
0.14519	0.862423	0.0150756
0.14569	0.863112	0.014988
0.1462	0.867178	0.0148428
0.14671	0.846049	0.0149065
0.14721	0.859197	0.0148753
0.14772	0.842311	0.0148828
0.14823	0.84502	0.0148061
0.14873	0.83083	0.0147934
0.14924	0.836331	0.0147408
0.14975	0.790533	0.0147476
0.15025	0.801507	0.0146945
0.15076	0.798362	0.0146637
0.15127	0.817274	0.0145687
0.15177	0.807632	0.014647
0.15228	0.804682	0.0146247
0.15279	0.774712	0.0145026
0.15329	0.758464	0.0144232
0.1538	0.74816	0.0144988
0.15431	0.785409	0.0143646
0.15481	0.77256	0.0143851
0.15532	0.762182	0.0143006
0.15583	0.765245	0.014273
0.15633	0.754606	0.0142696
0.15684	0.757299	0.0141924
0.15735	0.750209	0.0142786
0.15785	0.739237	0.014184
0.15836	0.744991	0.0139692
0.15887	0.7321	0.0140206
0.15937	0.720026	0.0140311
0.15988	0.72588	0.0139694
0.16039	0.714727	0.013911
0.16089	0.733407	0.0139873
0.1614	0.720063	0.0139555
0.16191	0.714364	0.013858
0.16241	0.687787	0.0138362
0.16292	0.705284	0.0138753
0.16343	0.698903	0.0137952
0.16393	0.68169	0.013719
0.16444	0.691599	0.0138636
0.16495	0.688926	0.0136947
0.16545	0.680641	0.0136569
0.16596	0.674993	0.0136755
0.16647	0.687723	0.0136861
0.16697	0.655266	0.0135705
0.16748	0.655497	0.0137383
0.16799	0.662215	0.0138015
0.16849	0.657065	0.0138386
0.169	0.676732	0.0138494
0.16951	0.662055	0.0138943
0.17001	0.643688	0.0139252
0.17052	0.647871	0.0138332
0.17103	0.67015	0.0139238
0.17153	0.650835	0.0139759
0.17204	0.656288	0.0139818
0.17255	0.65725	0.0139369
0.17305	0.646141	0.0139696
0.17356	0.666328	0.0140252
0.17407	0.674236	0.0139047
0.17457	0.645266	0.0139398
0.17508	0.632821	0.0139786
0.17559	0.6184	0.0139937
0.1761	0.642831	0.013891
0.1766	0.652889	0.0139633
0.17711	0.607895	0.0140782
0.17762	0.633454	0.0138646
0.17812	0.617585	0.0139678
0.17863	0.603569	0.0140699
0.17914	0.609954	0.0139235
0.17964	0.628392	0.0138146
0.18015	0.626708	0.0138453
0.18066	0.610796	0.0139694
0.18116	0.590278	0.0137843
0.18167	0.570626	0.0139798
0.18218	0.599613	0.0142076
0.18268	0.598749	0.0142149
0.18319	0.597957	0.01422
0.1837	0.593757	0.0142916
0.1842	0.583058	0.014346
0.18471	0.592063	0.0142686
0.18522	0.597855	0.0143656
0.18572	0.601841	0.0144661
0.18623	0.573862	0.0144564
0.18674	0.568805	0.0144867
0.18724	0.588976	0.0145871
0.18775	0.574137	0.0146702
0.18826	0.595874	0.014502
0.18876	0.561701	0.0145555
0.18927	0.575592	0.014711
0.18978	0.55179	0.0146358
0.19028	0.570667	0.0146818
0.19079	0.586501	0.0147051
0.1913	0.569406	0.0148436
0.1918	0.578613	0.0147117
0.19231	0.567623	0.0147345
0.19282	0.574833	0.014796
0.19332	0.560373	0.0148139
0.19383	0.589387	0.0148294
0.19434	0.549239	0.0148423
0.19484	0.565785	0.0149222
0.19535	0.554575	0.0148229
0.19586	0.541431	0.0148469
0.19636	0.544464	0.01498
0.19687	0.543246	0.0148734
0.19738	0.55662	0.0148759
0.19788	0.547042	0.0148926
0.19839	0.535053	0.0150077
0.1989	0.529136	0.0149173
0.1994	0.556337	0.0148929
0.19991	0.556449	0.0151204
0.20042	0.53921	0.014952
0.20092	0.535043	0.0148788
0.20143	0.54931	0.0150196
0.20194	0.517893	0.0151673
0.20244	0.522478	0.0149257
0.20295	0.540424	0.0149888
0.20346	0.514421	0.015141
0.20396	0.529984	0.0150578
0.20447	0.509371	0.0149708
0.20498	0.52584	0.0149484
0.20548	0.523244	0.0150448
0.20599	0.507315	0.0149018
0.2065	0.4876	0.0149862
0.207	0.496305	0.0151023
0.20751	0.51216	0.0149785
0.20802	0.534427	0.0149689
0.20852	0.511722	0.0150965
0.20903	0.485473	0.0150955
0.20954	0.478112	0.0148095
0.21004	0.496499	0.0147405
0.21055	0.487887	0.0150633
0.21106	0.490156	0.0149267
0.21156	0.499584	0.0148563
0.21207	0.482172	0.0149569
0.21258	0.483591	0.0150678
0.21308	0.476559	0.0149025
0.21359	0.507678	0.0149715
0.2141	0.495425	0.0149492
0.2146	0.461208	0.0149246
0.21511	0.48015	0.014904
0.21562	0.488378	0.0149241
0.21612	0.458628	0.0149956
0.21663	0.479514	0.0147438
0.21714	0.472987	0.0148037
0.21764	0.440248	0.0149731
0.21815	0.441299	0.0147573
0.21866	0.466083	0.0147034
0.21916	0.470594	0.0148198
0.21967	0.462888	0.0148665
0.22018	0.454862	0.0146371
0.22068	0.472915	0.014729
0.22119	0.454969	0.0147952
0.2217	0.452375	0.0146657
0.2222	0.463274	0.0145868
0.22271	0.470052	0.0145941
0.22322	0.430127	0.0147324
0.22372	0.456155	0.0144381
0.22423	0.44582	0.0144198
0.22474	0.465915	0.0145707
0.22524	0.44737	0.0144025
0.22575	0.436053	0.0142856
0.22626	0.456869	0.014431
0.22676	0.447569	0.0143871
0.22727	0.435829	0.0142452
0.22778	0.446272	0.0142765
0.22828	0.432859	0.0142961
0.22879	0.419273	0.0141368
0.2293	0.460868	0.0139886
0.2298	0.433111	0.0141378
0.23031	0.43759	0.0141035
0.23082	0.454475	0.0137774
0.23132	0.438681	0.0139392
0.23183	0.4161	0.0139829
0.23234	0.419315	0.0138009
0.23284	0.419958	0.0138717
0.23335	0.41102	0.0137782
0.23386	0.438887	0.0138464
0.23436	0.410764	0.0135988
0.23487	0.393781	0.0136206
0.23538	0.392237	0.0136568
0.23588	0.425391	0.0135457
0.23639	0.401145	0.0135006
0.2369	0.418505	0.013594
0.2374	0.431757	0.0135705
0.23791	0.40857	0.0133825
0.23842	0.410408	0.0134356
0.23892	0.401358	0.0134776
0.23943	0.423868	0.0133864
0.23994	0.411238	0.013388
0.24044	0.409386	0.0133579
0.24095	0.415787	0.0133397
0.24145	0.40548	0.013219
0.24196	0.403186	0.0132608
0.24247	0.396269	0.0132834
0.24297	0.40134	0.0131183
0.24348	0.411358	0.013179
0.24399	0.399508	0.0131907
0.24449	0.401931	0.0130955
0.245	0.41234	0.0130612
0.24551	0.37926	0.0130297
0.24601	0.404673	0.0130738
0.24652	0.390346	0.0129615
0.24703	0.386267	0.0129635
0.24753	0.390622	0.0129892
0.24804	0.377037	0.0129837
0.24855	0.385634	0.012876
0.24905	0.393298	0.0129326
0.24956	0.376673	0.012906
0.25007	0.372188	0.0127753
0.25057	0.382385	0.0128504
0.25108	0.393629	0.0128031
0.25159	0.389357	0.0128165
0.25209	0.385233	0.0126689
0.2526	0.384143	0.0127181
0.25311	0.39925	0.0127074
0.25361	0.37254	0.0125686
0.25412	0.376042	0.0125923
0.25463	0.379823	0.012621
0.25513	0.389017	0.0125958
0.25564	0.380766	0.0124683
0.25615	0.371099	0.0124288
0.25665	0.357648	0.0124202
0.25716	0.382851	0.0123975
0.25767	0.377392	0.0123303
0.25817	0.361961	0.0123881
0.25868	0.369745	0.012406
0.25919	0.38052	0.0123019
0.25969	0.362929	0.0123275
0.2602	0.389537	0.0122409
0.26071	0.3781	0.0122245
0.26121	0.35793	0.0121925
0.26172	0.384053	0.0122045
0.26223	0.353156	0.0121648
0.26273	0.367733	0.0121311
0.26324	0.365286	0.0121237
0.26375	0.368268	0.0120677
0.26425	0.360529	0.0121041
0.26476	0.367422	0.012084
0.26527	0.367463	0.0120205
0.26577	0.347176	0.0120472
0.26628	0.366943	0.0119925
0.26679	0.373831	0.0119616
0.26729	0.358524	0.0119763
0.2678	0.37367	0.0120057
0.26831	0.386911	0.0119339
0.26881	0.378458	0.0119073
0.26932	0.354555	0.0119085
0.26983	0.374224	0.0118909
0.27033	0.337505	0.0118622
0.27084	0.354818	0.0118425
0.27134	0.356342	0.0118207
0.27185	0.355964	0.011756
0.27236	0.347125	0.0117775
0.27286	0.335275	0.0117831
0.27337	0.374881	0.011792
0.27388	0.349699	0.0116805
0.27438	0.352592	0.011711
0.27489	0.348575	0.0117004
0.2754	0.363997	0.0116462
0.2759	0.358032	0.0116432
0.27641	0.343924	0.0116158
0.27692	0.336889	0.0116288
0.27742	0.339667	0.0115587
0.27793	0.338468	0.0115937
0.27844	0.356058	0.0116031
0.27894	0.328283	0.0115535
0.27945	0.346273	0.0115706
0.27996	0.344224	0.0116022
0.28046	0.343106	0.0115116
0.28097	0.353048	0.0114597
0.28148	0.33456	0.0114815
0.28198	0.337464	0.011492
0.28249	0.33626	0.0114397
0.283	0.33108	0.0114357
0.2835	0.321427	0.0114906
0.28401	0.319493	0.0114352
0.28452	0.345233	0.011429
0.28502	0.327076	0.0114332
0.28553	0.326251	0.0114386
0.28604	0.342677	0.0113333
0.28654	0.316328	0.0113653
0.28705	0.339094	0.011417
0.28756	0.329919	0.0113745
0.28806	0.347751	0.0113378
0.28857	0.331634	0.0114045
0.28908	0.311811	0.011428
0.28958	0.328956	0.011354
0.29009	0.330079	0.011343
0.29059	0.329854	0.0113818
0.2911	0.325756	0.0113619
0.29161	0.322196	0.0113642
0.29211	0.332723	0.0113913
0.29262	0.33397	0.0114363
0.29313	0.308345	0.0113547
0.29363	0.318361	0.0113784
0.29414	0.314589	0.0114019
0.29465	0.328152	0.0113611
0.29515	0.324993	0.0113329
0.29566	0.320218	0.011335
0.29617	0.314573	0.011412
0.29667	0.31313	0.0113202
0.29718	0.305607	0.0113078
0.29769	0.327979	0.0113603
0.29819	0.308842	0.0113344
0.2987	0.302615	0.0112544
0.29921	0.321452	0.0112898
0.29971	0.306809	0.0113129
0.30022	0.307837	0.0112706
0.30073	0.296967	0.011278
0.30123	0.31812	0.0112821
0.30174	0.306311	0.0113245
0.30225	0.305388	0.0112346
0.30275	0.297527	0.0112096
0.30326	0.312061	0.0112508
0.30377	0.303863	0.0111936
0.30427	0.321454	0.0111807
0.30478	0.299799	0.0111219
0.30529	0.309087	0.0111928
0.30579	0.304964	0.011116
0.3063	0.322793	0.0110749
0.3068	0.29635	0.0111276
0.30731	0.302022	0.0111828
0.30782	0.301558	0.0111881
0.30832	0.313083	0.0112905
0.30883	0.294856	0.0113273
0.30934	0.297859	0.011257
0.30984	0.287228	0.011276
0.31035	0.301188	0.0113718
0.31086	0.307098	0.0113352
0.31136	0.291384	0.0114222
0.31187	0.313321	0.0115063
0.31238	0.300932	0.0116578
0.31288	0.291349	0.01164
0.31339	0.29842	0.011678
0.3139	0.284027	0.0117583
0.3144	0.290845	0.011775
0.31491	0.30025	0.0118343
0.31542	0.276812	0.0117874
0.31592	0.295482	0.0119576
0.31643	0.282044	0.0119003
0.31694	0.272596	0.0118864
0.31744	0.272175	0.0120195
0.31795	0.310765	0.012037
0.31845	0.283826	0.0119623
0.31896	0.27445	0.0119727
0.31947	0.273625	0.0120476
0.31997	0.277502	0.01197
0.32048	0.28341	0.0119999
0.32099	0.275735	0.0121639
0.32149	0.304409	0.0120491
0.322	0.288926	0.0119741
0.32251	0.279582	0.0119659
0.32301	0.272498	0.0120756
0.32352	0.3067	0.0120638
0.32403	0.268213	0.0120357
0.32453	0.271809	0.0120313
0.32504	0.293824	0.012094
0.32555	0.278405	0.0119611
0.32605	0.267373	0.0120479
0.32656	0.275301	0.012049
0.32707	0.286052	0.0120553
0.32757	0.280347	0.0120227
0.32808	0.274027	0.0120622
0.32859	0.272636	0.0121643
0.32909	0.260274	0.0120309
0.3296	0.281738	0.01208
0.3301	0.270327	0.0121755
0.33061	0.274227	0.0121284
0.33112	0.294159	0.0120933
0.33162	0.266233	0.012169
0.33213	0.281459	0.0122376
0.33264	0.272554	0.0121419
0.33314	0.28909	0.0121371
0.33365	0.271846	0.0122601
0.33416	0.268246	0.0122192
0.33466	0.261565	0.0121646
0.33517	0.261999	0.0122178
0.33568	0.276626	0.0122852
0.33618	0.263541	0.0122292
0.33669	0.292642	0.0122082
0.3372	0.284162	0.0122487
0.3377	0.274224	0.0123197
0.33821	0.27634	0.0122422
0.33872	0.279852	0.0122519
0.33922	0.237114	0.0123354
0.33973	0.25782	0.0122867
0.34023	0.277587	0.0122768
0.34074	0.250835	0.0123618
0.34125	0.27917	0.0123348
0.34175	0.247193	0.0122951
0.34226	0.274202	0.0123187
0.34277	0.256721	0.0123808
0.34327	0.260634	0.0123292
0.34378	0.281741	0.0122722
0.34429	0.270192	0.0123562
0.34479	0.265454	0.0124504
0.3453	0.282356	0.0123162
0.34581	0.265529	0.0123272
0.34631	0.265622	0.0124443
0.34682	0.250256	0.0124177
0.34733	0.255105	0.0123934
0.34783	0.253798	0.012477
0.34834	0.261306	0.0125445
0.34884	0.253437	0.0123518
0.34935	0.244415	0.0124107
0.34986	0.261669	0.0124157
0.35036	0.266404	0.0124515
0.35087	0.264297	0.012304
0.35138	0.263781	0.012427
0.35188	0.270437	0.0124505
0.35239	0.258505	0.0123476
0.3529	0.245088	0.0123415
0.3534	0.260142	0.0124474
0.35391	0.249673	0.0124242
0.35442	0.251183	0.0122514
0.35492	0.269606	0.0121276
0.35543	0.236087	0.0119922
0.35594	0.253776	0.0119742
0.35644	0.249691	0.0117983
0.35695	0.230331	0.0117945
0.35745	0.25583	0.0117836
0.35796	0.259104	0.0115441
0.35847	0.25298	0.0116908
0.35897	0.257297	0.0118246
0.35948	0.246536	0.0118363
0.35999	0.244258	0.0118395
0.36049	0.244297	0.0118935
0.361	0.243487	0.0119804
0.36151	0.247465	0.0119037
0.36201	0.256176	0.0119092
0.36252	0.248884	0.0121109
0.36303	0.250831	0.0120921
0.36353	0.244763	0.0119633
0.36404	0.263658	0.0121652
0.36455	0.257273	0.0121985
0.36505	0.261587	0.0121437
0.36556	0.241221	0.0121077
0.36606	0.253524	0.0122065
0.36657	0.248989	0.012274
0.36708	0.242204	0.0121658
0.36758	0.259371	0.012321
0.36809	0.256544	0.0123935
0.3686	0.263401	0.0123739
0.3691	0.244493	0.0124994
0.36961	0.227435	0.0126986
0.37012	0.252528	0.0127781
0.37062	0.243273	0.0128156
0.37113	0.244292	0.0128783
0.37164	0.247291	0.0129785
0.37214	0.21947	0.012876
0.37265	0.237046	0.0128614
0.37315	0.264602	0.012896
0.37366	0.242708	0.0128716
0.37417	0.237148	0.0128037
0.37467	0.247604	0.0128456
0.37518	0.234496	0.0130292
0.37569	0.23964	0.0130563
0.37619	0.240743	0.0129755
0.3767	0.238161	0.0131357
0.37721	0.243918	0.0132123
0.37771	0.22856	0.0131789
0.37822	0.233566	0.0132554
0.37873	0.255225	0.013381
0.37923	0.246784	0.0134337
0.37974	0.232386	0.013388
0.38024	0.242979	0.0135548
0.38075	0.256559	0.0135538
0.38126	0.224013	0.0135467
0.38176	0.237538	0.0135496
0.38227	0.233702	0.0137199
0.38278	0.239461	0.0138127
0.38328	0.226648	0.0136889
0.38379	0.254881	0.0138423
0.3843	0.238265	0.0139297
0.3848	0.239325	0.0139992
0.38531	0.210538	0.0139522
0.38582	0.237661	0.0140927
0.38632	0.261617	0.0141004
0.38683	0.243118	0.0141667
0.38733	0.23999	0.0142141
0.38784	0.238264	0.014268
0.38835	0.257345	0.0143233
0.38885	0.245021	0.0143027
0.38936	0.254218	0.0145232
0.38987	0.231143	0.0144885
0.39037	0.244484	0.0146825
0.39088	0.2445	0.0145602
0.39139	0.232565	0.0146868
0.39189	0.218003	0.0148564
0.3924	0.233571	0.0148351
0.3929	0.234026	0.0148264
0.39341	0.226914	0.0149456
0.39392	0.246686	0.0151066
0.39442	0.223334	0.0150875
0.39493	0.260468	0.015146
0.39544	0.240473	0.0152437
0.39594	0.218061	0.0152666
0.39645	0.226885	0.0161265
0.39696	0.237983	0.0155126
0.39746	0.23547	0.015524
0.39797	0.241376	0.0155311
0.39847	0.245735	0.0156924
0.39898	0.24267	0.0156914
0.39949	0.217652	0.015727
0.39999	0.240618	0.0157868
0.4005	0.230235	0.0158965
0.40101	0.239492	0.0160742
0.40151	0.229325	0.0158991
0.40202	0.232539	0.0159987
0.40253	0.210086	0.0162198
0.40303	0.234196	0.0162653
0.40354	0.248812	0.0160844
0.40405	0.217231	0.016269
0.40455	0.214046	0.0163283
0.40506	0.226095	0.0163419
0.40556	0.217813	0.0163363
0.40607	0.241121	0.0164475
0.40658	0.219564	0.0166239
0.40708	0.218809	0.0164302
0.40759	0.219455	0.0164679
0.4081	0.227942	0.0168094
0.4086	0.213738	0.016615
0.40911	0.226798	0.0165823
0.40962	0.219927	0.0167383
0.41012	0.260474	0.0170336
0.41063	0.225782	0.0166666
0.41113	0.208734	0.016718
0.41164	0.213782	0.0170858
0.41215	0.236949	0.0169921
0.41265	0.220682	0.0167031
0.41316	0.225642	0.017066
0.41367	0.209147	0.0172579
0.41417	0.204835	0.0170581
0.41468	0.206371	0.0170851
0.41518	0.225191	0.0173304
0.41569	0.236098	0.0174864
0.4162	0.207388	0.0171194
0.4167	0.202514	0.0172804
0.41721	0.220577	0.0176723
0.41772	0.207782	0.017419
0.41822	0.200401	0.0173342
0.41873	0.206203	0.0175393
0.41924	0.203438	0.0180229
0.41974	0.205869	0.0176608
0.42025	0.233482	0.0176631
0.42075	0.216639	0.018094
0.42126	0.195646	0.0180473
0.42177	0.215322	0.0177523
0.42227	0.199343	0.0181156
0.42278	0.237566	0.0184603
0.42329	0.193939	0.0184
0.42379	0.206575	0.0181795
0.4243	0.22309	0.0186122
0.42481	0.205472	0.0191659
0.42531	0.224064	0.0184692
0.42582	0.200561	0.0188166
0.42632	0.208979	0.0193445
0.42683	0.229669	0.0192849
0.42734	0.205692	0.019104
0.42784	0.23108	0.0194005
0.42835	0.208008	0.0198686
0.42886	0.204537	0.0197264
0.42936	0.234207	0.0196819
0.42987	0.216017	0.0201745
0.43037	0.221489	0.020373
0.43088	0.233303	0.0200049
0.43139	0.219665	0.0202663
0.43189	0.194797	0.020945
0.4324	0.21746	0.0207314
0.43291	0.197195	0.0206916
0.43341	0.218628	0.0209411
0.43392	0.205844	0.0215636
0.43443	0.223963	0.0210745
0.43493	0.22899	0.0214352
0.43544	0.220143	0.0220581
0.43594	0.202937	0.0219239
0.43645	0.184207	0.0218628
0.43696	0.201229	0.022133
0.43746	0.190368	0.022672
0.43797	0.230945	0.0225647
0.43848	0.191387	0.0227123
0.43898	0.232808	0.0230491
0.43949	0.174228	0.0234128
0.43999	0.20601	0.0232183

[truncated: 5 more sheets: 6G_Tris, 6H_CAHS D_Betaine Summary, 6H_R plot, SASA and TFE data, 6I_Synergy Correlation values]
