# Supplementary material for: Disordered proteins interact with the chemical environment to tune their protective function during drying
Source: eLife journal article supplement (doi:10.7554/elife.97231), 2024-06-21
Supplement: supp1 [file elife-97231-supp1-v1.pdf]

| Organism                                                                          | Motif | Concentration (mM) |
|-----------------------------------------------------------------------------------|-------|--------------------|
|  | At11  | 0.297              |
|                                                                                   | At22  | 0.277              |
|                                                                                   | At44  | 0.161              |
|  | Aav11 | 0.0562             |
|  | He11  | 0.287              |
|  | Av11  | 0.262              |
|  | At20  | 0.264              |

A. Protein concentrations used in synergy assays for LEA motifs in this study.

| Organism                                                                            | Protein    | Concentration (mM) |
|-------------------------------------------------------------------------------------|------------|--------------------|
|  | AtLEA3-3   | 0.1215             |
|  | AavLEA1    | 0.112              |
|  | HeLEA68614 | 0.0392             |
|  | AvLEA1C    | 0.068              |
|  | AtLEA4-2   | 0.217              |
|  | CAHS D     | 0.0078             |
|  | BSA        | 0.054              |

B. Protein concentrations used in synergy assays for full-length proteins in this study
